# Supplementary material
Source: PubMed Central journal article supplement (PMC4543426)
Supplement: NIHMS693711-supplement-2.pdf [file NIHMS693711-supplement-2.pdf]

**Table S1: Percentage of experimental animals with abnormal growths in tissues other than the lungs**

| Screen    | Genotype                                                            | N   | Chest Cavity | Fat Pads | GI Tract | Head & Neck | Heart | Kidney | Liver | Lymph Nodes | Limbs | Pancreas | Peritoneal cavity | Seminal Vesicles | Skin | Spleen | Thymus |
|-----------|---------------------------------------------------------------------|-----|--------------|----------|----------|-------------|-------|--------|-------|-------------|-------|----------|-------------------|------------------|------|--------|--------|
| wild-type | <i>Rosa26-LsL-SB11 x T2/Onc x Spc-Cre</i>                           | 53  | 2%           | 0%       | 2%       | 4%          | 8%    | 0%     | 13%   | 11%         | 17%   | 4%       | 0%                | 15%              | 4%   | 28%    | 4%     |
| p19       | <i>Rosa26-LsL-SB11 x T2/Onc x Spc-Cre x p19ARF<sup>-/-</sup></i>    | 99  | 10%          | 1%       | 1%       | 6%          | 1%    | 0%     | 48%   | 28%         | 12%   | 3%       | 1%                | 2%               | 0%   | 82%    | 6%     |
| p53       | <i>Rosa26-LsL-SB11 x T2/Onc x Spc-Cre x p53<sup>+fl</sup>/R270H</i> | 116 | 9%           | 2%       | 7%       | 10%         | 1%    | 5%     | 25%   | 17%         | 27%   | 5%       | 9%                | 5%               | 0%   | 59%    | 7%     |
| Pten      | <i>Rosa26-LsL-SB11 x T2/Onc x Spc-Cre x Pten<sup>fl/fl</sup></i>    | 62  | 5%           | 2%       | 6%       | 48%         | 0%    | 0%     | 5%    | 37%         | 23%   | 2%       | 2%                | 6%               | 0%   | 35%    | 2%     |

**Table S3: Candidate Lung Cancer Genes based on CIS**

| Candidate Mouse Gene | Mouse Gene ID | Candidate Human Gene | Human Gene ID | Total # of insertions in gene | Predicted Effect | Other genes in CIS   | CIS locus (NCBI37/mm9)    | % of mice | # of mice |
|----------------------|---------------|----------------------|---------------|-------------------------------|------------------|----------------------|---------------------------|-----------|-----------|
| Serinc3              | 26943         | SERINC3              | 10955         | 43                            | Gain             |                      | chr2:163459000-163481000  | 50%       | 12        |
| Nckap5               | 210356        | NCKAP5               | 344148        | 39                            | Loss             |                      | chr1:128334400-128531400  | 33%       | 8         |
| Magi1                | 14924         | MAGI1                | 9223          | 35                            | Loss             |                      | chr6:93709200-93749200    | 33%       | 8         |
| Ppp3ca               | 19055         | PPP3CA               | 5530          | 16                            | Loss             |                      | chr3:136358800-136481800  | 33%       | 8         |
| Ank3                 | 11735         | ANK3                 | 288           | 16                            | Loss             |                      | chr10:69052600-69175600   | 29%       | 7         |
| Gab2                 | 14389         | GAB2                 | 9846          | 12                            | Loss             | Nars2                | chr7:104192700-104315700  | 33%       | 8         |
| Stag2                | 20843         | STAG2                | 10735         | 12                            | Loss             |                      | chrX:39548500-39639500    | 25%       | 6         |
| Arfgef1              | 211673        | ARFGEF1              | 10565         | 12                            | Loss             |                      | chr1:10134100-10198100    | 21%       | 5         |
| Mllt10               | 17354         | MLLT10               | 8028          | 11                            | Loss             |                      | chr2:17981900-18104900    | 38%       | 9         |
| Rock1                | 19877         | ROCK1                | 6093          | 11                            | Loss             |                      | chr18:10051700-10142700   | 38%       | 9         |
| Wac                  | 225131        | WAC                  | 51322         | 11                            | Loss             |                      | chr18:7833700-7924700     | 38%       | 9         |
| Map4k3               | 225028        | MAP4K3               | 8491          | 11                            | Loss             |                      | chr17:80996700-81119700   | 33%       | 8         |
| Cobl1                | 319876        | COBLL1               | 22837         | 11                            | Loss             |                      | chr2:64978000-65069000    | 29%       | 7         |
| Stim2                | 116873        | STIM2                | 57620         | 11                            | Loss             |                      | chr5:54401100-54492100    | 29%       | 7         |
| Cul3                 | 26554         | CUL3                 | 8452          | 11                            | Loss             |                      | chr1:80282000-80322000    | 25%       | 6         |
| Magi3                | 99470         | MAGI3                | 260425        | 11                            | Gain             |                      | chr3:103913100-103953100  | 25%       | 6         |
| Simap                | 83997         | SLMAP                | 7871          | 11                            | Gain             |                      | chr14:27302300-27366300   | 25%       | 6         |
| Gsk3b                | 56637         | GSK3B                | 2932          | 11                            | Loss             |                      | chr16:38197500-38219500   | 17%       | 4         |
| Tle4                 | 21888         | TLE4                 | 7091          | 10                            | Loss             |                      | chr19:14554000-14677000   | 33%       | 8         |
| Sptbn1               | 20742         | SPTBN1               | 6711          | 10                            | Loss             |                      | chr11:30001400-30124400   | 29%       | 7         |
| Crebbp               | 12914         | CREBBP               | 1387          | 10                            | Loss             |                      | chr16:4125900-4189900     | 21%       | 5         |
| Btdb7                | 238386        | BTBD7                | 55727         | 9                             | Loss             |                      | chr12:104037200-104077200 | 29%       | 7         |
| Cdk13                | 69562         | CDK13                | 8621          | 9                             | Loss             | 2810021B07Rik        | chr13:17794700-17885700   | 29%       | 7         |
| Stard13              | 243362        | STARD13              | 90627         | 9                             | Gain             |                      | chr5:151913300-152004300  | 29%       | 7         |
| Vps54                | 245944        | VPS54                | 51542         | 9                             | Loss             |                      | chr11:21164900-21204900   | 29%       | 7         |
| Arhgap5              | 11855         | ARHGAP5              | 394           | 9                             | Loss             |                      | chr12:53620200-53660200   | 25%       | 6         |
| Setd2                | 235626        | SETD2                | 29072         | 9                             | Loss             | Nradd                | chr9:110486900-110526900  | 25%       | 6         |
| Pbrm1                | 66923         | PBRM1                | 55193         | 9                             | Loss             |                      | chr14:31869900-31891900   | 21%       | 5         |
| Map3k8               | 26410         | MAP3K8               | 1326          | 9                             | Loss             |                      | chr18:4316000-4338000     | 13%       | 3         |
| Mpp5                 | 56217         | MPP5                 | 64398         | 8                             | Loss             |                      | chr12:79852500-79943500   | 33%       | 8         |
| Psd3                 | 234353        | PSD3                 | 23362         | 8                             | Gain             |                      | chr8:70454700-70577700    | 33%       | 8         |
| Atp13a3              | 224088        | ATP13A3              | 79572         | 8                             | Loss             |                      | chr16:30327000-30418000   | 29%       | 7         |
| Col4a3bp             | 68018         | COL4A3BP             | 10087         | 8                             | Loss             |                      | chr13:97318100-97409100   | 29%       | 7         |
| Hectd1               | 207304        | HECTD1               | 25831         | 8                             | Loss             |                      | chr12:52861400-52925400   | 29%       | 7         |
| Actr2                | 66713         | ACTR2                | 10097         | 8                             | Loss             |                      | chr11:19985800-20007800   | 25%       | 6         |
| Asxl2                | 75302         | ASXL2                | 55252         | 8                             | Loss             | 1110002L01Rik, Kif3c | chr12:3397700-3488700     | 25%       | 6         |
| Pan3                 | 72587         | PAN3                 | 255967        | 8                             | Loss             |                      | chr5:148247700-148338700  | 25%       | 6         |
| Wapal                | 218914        | WAPAL                | 23063         | 8                             | Loss             |                      | chr14:35488800-35528800   | 25%       | 6         |
| Cacul1               | 78832         | CACUL1               | 143384        | 8                             | Loss             |                      | chr19:60635700-60657700   | 21%       | 5         |
| Fbxw11               | 103583        | FBXW11               | 23291         | 8                             | Gain             |                      | chr11:32582700-32604700   | 21%       | 5         |
| Ints6                | 18130         | INTS6                | 26512         | 8                             | Loss             |                      | chr14:63321500-63361500   | 21%       | 5         |
| Smad4                | 17128         | SMAD4                | 4089          | 8                             | Loss             |                      | chr18:73817500-73839500   | 21%       | 5         |
| Tab2                 | 68652         | TAB2                 | 23118         | 8                             | Loss             |                      | chr10:7631800-7671800     | 21%       | 5         |
| Cblb                 | 208650        | CBLB                 | 868           | 8                             | Loss             |                      | chr16:52142700-52164700   | 17%       | 4         |
| Zfp148               | 22661         | ZNF148               | 7707          | 8                             | Loss             |                      | chr16:33432400-33454400   | 17%       | 4         |
| Scaf8                | 106583        | SCAF8                | 22828         | 7                             | Loss             |                      | chr17:3146100-3237100     | 38%       | 9         |
| Cnot1                | 234594        | CNOT1                | 23019         | 7                             | Loss             | Setd6                | chr8:98241500-98332500    | 29%       | 7         |
| Jmjd1c               | 108829        | JMJD1C               | 221037        | 7                             | Loss             | Nrbf2                | chr10:66645000-66736000   | 29%       | 7         |
| Eml4                 | 78798         | EML4                 | 27436         | 7                             | Gain             |                      | chr17:83765000-83805000   | 25%       | 6         |
| Atp11b               | 76295         | ATP11B               | 23200         | 7                             | Gain             |                      | chr3:35657900-35679900    | 21%       | 5         |
| Ctnna1               | 12385         | CTNNA1               | 1495          | 7                             | Loss             |                      | chr18:35347700-35369700   | 21%       | 5         |
| Rbpj                 | 19664         | RBPJ                 | 3516          | 7                             | Loss             |                      | chr5:54001400-54041400    | 21%       | 5         |
| Tnpo1                | 238799        | TNPO1                | 3842          | 7                             | Loss             |                      | chr13:99633100-99655100   | 21%       | 5         |
| Wdr7                 | 104082        | WDR7                 | 23335         | 7                             | Loss             |                      | chr18:63974300-63996300   | 21%       | 5         |
| Cnot4                | 53621         | CNOT4                | 4850          | 7                             | Loss             |                      | chr6:34958800-34998800    | 17%       | 4         |
| Pcm1                 | 18536         | PCM1                 | 5108          | 6                             | Loss             | Asah1, Frg1          | chr8:42327700-42486700    | 33%       | 8         |
| Kif2a                | 16563         | KIF2A                | 3796          | 6                             | Loss             | Dimt1                | chr13:107747000-107811000 | 29%       | 7         |
| Chd1                 | 12648         | CHD1                 | 1105          | 6                             | Loss             |                      | chr17:15861600-15925600   | 25%       | 6         |
| Ggnbp2               | 217039        | GGNBP2               | 79893         | 6                             | Loss             |                      | chr11:84654000-84694000   | 25%       | 6         |
| Gbp1                 | 73274         | GPBP1                | 65056         | 6                             | Loss             |                      | chr13:112239700-112279700 | 25%       | 6         |
| Adam19               | 11492         | ADAM19               | 8728          | 6                             | Gain             |                      | chr11:45888700-45910700   | 21%       | 5         |
| Jhdm1d               | 338523        | JHDM1D               | 80853         | 6                             | Loss             |                      | chr6:39107500-39129500    | 21%       | 5         |
| Ndfip1               | 65113         | NDFIP1               | 80762         | 6                             | Loss             |                      | chr18:38598900-38620900   | 21%       | 5         |
| Ranbp9               | 56705         | RANBP9               | 10048         | 6                             | Loss             |                      | chr13:43498900-43538900   | 21%       | 5         |
| Cnot2                | 72068         | CNOT2                | 4848          | 6                             | Loss             |                      | chr10:115973200-115995200 | 17%       | 4         |
| Rab1                 | 19324         | RAB1A                | 5861          | 6                             | Loss             |                      | chr11:20105600-20127600   | 17%       | 4         |
| Trpc4ap              | 56407         | TRPC4AP              | 26133         | 6                             | Loss             |                      | chr2:155474000-155514000  | 17%       | 4         |
| Svil                 | 225115        | SVIL                 | 6840          | 5                             | Loss             |                      | chr18:4933000-5130000     | 38%       | 9         |
| Fam179b              | 328108        | FAM179B              | 23116         | 5                             | Loss             | Prpf39               | chr12:66069200-66160200   | 33%       | 8         |
| Ehd4                 | 98878         | EHD4                 | 30844         | 5                             | Loss             |                      | chr2:119932600-119954600  | 17%       | 4         |
| Tbc1d20              | 67231         | TBC1D20              | 128637        | 4                             | Loss             |                      | chr2:152116400-152138400  | 21%       | 5         |
| Zfp62                | 22720         | ZFP62                | 643836        | 4                             | Loss             |                      | chr11:49019600-49041600   | 21%       | 5         |
| Rab9                 | 56382         | RAB9A                | 9367          | 4                             | Loss             |                      | chrX:162894200-162916200  | 17%       | 4         |
| 170002014Rik         | 66602         | No Ortholog          | No Ortholog   | 2                             | Loss             | 1500003O03Rik        | chr2:119393700-119433700  | 25%       | 6         |
| Cct7                 | 12516         | CC7                  | 10574         | 2                             | Loss             | Smyd5, 1700040I03Rik | chr6:85393500-85415500    | 21%       | 5         |
| Cntnap5a             | 636808        | CNTNAP5              | 129684        | 0                             | Unknown          |                      | chr1:118870000-118961000  | 29%       | 7         |

Table S4: CIS human ortholog overlap with human cancer genes

|               |        |         |          |       |       |       |       |
|---------------|--------|---------|----------|-------|-------|-------|-------|
| p-Value*      | 0.0001 | 5.3 e-8 | 3.5 e-11 | 0.018 | 0.003 | 0.004 | 0.001 |
| Overlap Total | 9      | 52      | 44       | 29    | 2     | 12    | 2     |

| CIS Human Ortholog | Cancer Gene Census | COSMIC >9 Lung Mutations | TCGA >9 Lung Mutations | Hammerman Sig amp/del | Hammerman Sig Mutations | Imielinski Sig Rearrangements | Imielinski Sig Mutations | CGC + COSMIC + TCGA + Hammerman + Imielinski |
|--------------------|--------------------|--------------------------|------------------------|-----------------------|-------------------------|-------------------------------|--------------------------|----------------------------------------------|
| CBLB               | Yes                | Yes                      | Yes                    | Yes                   |                         |                               |                          | 4                                            |
| CREBBP             | Yes                | Yes                      | Yes                    |                       | Yes                     |                               |                          | 4                                            |
| EML4               | Yes                | Yes                      |                        |                       |                         |                               |                          | 2                                            |
| MLLT10             | Yes                | Yes                      | Yes                    |                       |                         |                               |                          | 3                                            |
| PBRM1              | Yes                | Yes                      | Yes                    |                       |                         | Yes                           |                          | 4                                            |
| PCM1               | Yes                | Yes                      | Yes                    |                       |                         |                               |                          | 3                                            |
| SETD2              | Yes                | Yes                      | Yes                    |                       |                         |                               | Yes                      | 4                                            |
| SMAD4              | Yes                | Yes                      | Yes                    |                       | Yes                     |                               | Yes                      | 3                                            |
| STAG2              | Yes                | Yes                      | Yes                    |                       |                         |                               |                          | 2                                            |
| ACTR2              |                    |                          |                        |                       |                         |                               |                          | 0                                            |
| ADAM19             |                    | Yes                      | Yes                    | Yes                   |                         |                               |                          | 3                                            |
| ANK3               |                    | Yes                      | Yes                    |                       |                         | Yes                           |                          | 3                                            |
| ARFGEF1            |                    | Yes                      | Yes                    |                       |                         |                               |                          | 2                                            |
| ARHGAP5            |                    | Yes                      | Yes                    | Yes                   |                         |                               |                          | 3                                            |
| ASXL2              |                    | Yes                      | Yes                    |                       |                         |                               |                          | 2                                            |
| ATP11B             |                    | Yes                      | Yes                    | Yes                   |                         | Yes                           |                          | 3                                            |
| ATP13A3            |                    | Yes                      | Yes                    |                       |                         |                               |                          | 2                                            |
| BTBD7              |                    | Yes                      |                        |                       |                         |                               |                          | 1                                            |
| CACUL1             |                    |                          |                        |                       |                         |                               |                          | 0                                            |
| CCT7               |                    |                          |                        |                       |                         |                               |                          | 0                                            |
| CDK13              |                    | Yes                      |                        |                       |                         | Yes                           |                          | 2                                            |
| CHD1               |                    | Yes                      | Yes                    | Yes                   |                         |                               |                          | 3                                            |
| CNOT1              |                    | Yes                      | Yes                    |                       |                         |                               |                          | 2                                            |
| CNOT2              |                    | Yes                      | Yes                    | Yes                   |                         |                               |                          | 3                                            |
| CNOT4              |                    | Yes                      | Yes                    | Yes                   |                         |                               |                          | 3                                            |
| CNTNAP5            |                    | Yes                      | Yes                    |                       |                         |                               |                          | 2                                            |
| COBLL1             |                    | Yes                      |                        |                       |                         | Yes                           |                          | 2                                            |
| COL4A3BP           |                    |                          |                        | Yes                   |                         |                               |                          | 1                                            |
| CTNNA1             |                    |                          | Yes                    | Yes                   |                         |                               |                          | 2                                            |
| CUL3               |                    | Yes                      | Yes                    | Yes                   |                         |                               |                          | 3                                            |
| EHD4               |                    |                          |                        | Yes                   |                         |                               |                          | 1                                            |
| FAM179B            |                    | Yes                      | Yes                    | Yes                   |                         |                               |                          | 3                                            |
| FBXW11             |                    |                          |                        | Yes                   |                         |                               |                          | 1                                            |
| GAB2               |                    |                          |                        |                       |                         |                               |                          | 0                                            |
| GGNBP2             |                    | Yes                      | Yes                    |                       |                         |                               |                          | 2                                            |
| GPBP1              |                    |                          |                        | Yes                   |                         |                               |                          | 1                                            |
| GSK3B              |                    | Yes                      |                        | Yes                   |                         |                               |                          | 2                                            |
| HECTD1             |                    | Yes                      | Yes                    | Yes                   |                         |                               |                          | 3                                            |
| INTS6              |                    | Yes                      |                        |                       |                         |                               |                          | 1                                            |
| JHDM1D             |                    | Yes                      | Yes                    | Yes                   |                         |                               |                          | 3                                            |
| JMJD1C             |                    | Yes                      | Yes                    |                       |                         | Yes                           |                          | 3                                            |
| KIF2A              |                    |                          |                        | Yes                   |                         |                               |                          | 1                                            |
| MAG1               |                    | Yes                      | Yes                    |                       |                         | Yes                           |                          | 3                                            |
| MAG13              |                    | Yes                      | Yes                    | Yes                   |                         | Yes                           |                          | 3                                            |
| MAP3K8             |                    |                          |                        |                       |                         |                               |                          | 0                                            |
| MAP4K3             |                    | Yes                      | Yes                    |                       |                         |                               |                          | 2                                            |
| MPP5               |                    |                          |                        |                       |                         |                               |                          | 0                                            |
| NCKAP5             |                    | Yes                      | Yes                    |                       |                         |                               |                          | 2                                            |
| NDFIP1             |                    |                          |                        | Yes                   |                         |                               |                          | 1                                            |
| PAN3               |                    | Yes                      |                        | Yes                   |                         |                               |                          | 2                                            |
| PPP3CA             |                    | Yes                      | Yes                    | Yes                   |                         |                               |                          | 3                                            |
| PSD3               |                    | Yes                      | Yes                    |                       |                         |                               |                          | 2                                            |
| RAB1A              |                    |                          |                        |                       |                         |                               |                          | 0                                            |
| RAB9A              |                    |                          |                        |                       |                         |                               |                          | 0                                            |
| RANBP9             |                    |                          |                        |                       |                         |                               |                          | 0                                            |
| RBPJ               |                    |                          |                        | Yes                   |                         |                               |                          | 1                                            |
| ROCK1              |                    | Yes                      | Yes                    |                       |                         | Yes                           |                          | 3                                            |
| SCAF8              |                    | Yes                      | Yes                    |                       |                         |                               |                          | 2                                            |
| SERINC3            |                    | Yes                      |                        |                       |                         | Yes                           |                          | 2                                            |
| SLMAP              |                    | Yes                      |                        |                       |                         |                               |                          | 1                                            |
| SPTBN1             |                    | Yes                      | Yes                    |                       |                         | Yes                           |                          | 3                                            |
| STARD13            |                    | Yes                      | Yes                    |                       |                         |                               |                          | 2                                            |
| STIM2              |                    |                          | Yes                    | Yes                   |                         |                               |                          | 2                                            |
| SVIL               |                    | Yes                      | Yes                    |                       |                         |                               |                          | 2                                            |
| TAB2               |                    |                          |                        | Yes                   |                         |                               |                          | 1                                            |
| TBC1D20            |                    |                          |                        |                       |                         |                               |                          | 0                                            |
| TLE4               |                    | Yes                      | Yes                    |                       |                         |                               |                          | 2                                            |
| TNPO1              |                    |                          |                        | Yes                   |                         |                               |                          | 1                                            |
| TRPC4AP            |                    | Yes                      |                        |                       |                         |                               |                          | 1                                            |
| VPS54              |                    | Yes                      |                        |                       |                         |                               |                          | 1                                            |
| WAC                |                    |                          | Yes                    |                       |                         |                               |                          | 1                                            |
| WAPAL              |                    | Yes                      | Yes                    | Yes                   |                         |                               |                          | 3                                            |
| WDR7               |                    | Yes                      | Yes                    |                       |                         | Yes                           |                          | 3                                            |
| ZFP62              |                    |                          |                        | Yes                   |                         |                               |                          | 1                                            |
| ZNF148             |                    | Yes                      | Yes                    | Yes                   |                         |                               |                          | 3                                            |

\*p-Value based on 2-Tailed Fisher's Exact Test

**Table S5: Ingenuity Pathway Analysis significant canonical pathways with 3 or more molecules**

| Ingenuity Canonical Pathways                                                   | -log(p-value) | Ratio    | Molecules                                | # Molecules |
|--------------------------------------------------------------------------------|---------------|----------|------------------------------------------|-------------|
| Molecular Mechanisms of Cancer                                                 | 3.32E+00      | 1.84E-02 | GAB2,TAB2,CREBBP,CTNNA1,RBPJ,SMAD4,GSK3B | 7           |
| B Cell Receptor Signaling                                                      | 3.32E+00      | 2.92E-02 | GAB2,CREBBP,MAP3K8,GSK3B,PPP3CA          | 5           |
| Cardiac Hypertrophy Signaling                                                  | 2.66E+00      | 2.02E-02 | ROCK1,CREBBP,MAP3K8,GSK3B,PPP3CA         | 5           |
| NF-κB Signaling                                                                | 2.33E+00      | 2.30E-02 | TAB2,CREBBP,MAP3K8,GSK3B                 | 4           |
| RANK Signaling in Osteoclasts                                                  | 2.27E+00      | 3.16E-02 | TAB2,MAP3K8,PPP3CA                       | 3           |
| RhoGDI Signaling                                                               | 2.26E+00      | 2.01E-02 | ROCK1,ARHGAP5,ACTR2,CREBBP               | 4           |
| Sertoli Cell-Sertoli Cell Junction Signaling                                   | 2.23E+00      | 2.04E-02 | SPTBN1,CTNNA1,MAP3K8,GSK3B               | 4           |
| Mouse Embryonic Stem Cell Pluripotency                                         | 2.16E+00      | 3.03E-02 | CREBBP,SMAD4,GSK3B                       | 3           |
| Integrin Signaling                                                             | 2.07E+00      | 1.92E-02 | ROCK1,ARHGAP5,ACTR2,GSK3B                | 4           |
| NGF Signaling                                                                  | 2.02E+00      | 2.52E-02 | ROCK1,CREBBP,MAP3K8                      | 3           |
| Role of Osteoblasts, Osteoclasts and Chondrocytes in Rheumatoid Arthritis      | 1.91E+00      | 1.67E-02 | TAB2,SMAD4,GSK3B,PPP3CA                  | 4           |
| PTEN Signaling                                                                 | 1.91E+00      | 2.26E-02 | MAGI1,GSK3B,MAGI3                        | 3           |
| RhoA Signaling                                                                 | 1.91E+00      | 2.50E-02 | ROCK1,ARHGAP5,ACTR2                      | 3           |
| PI3K/AKT Signaling                                                             | 1.86E+00      | 2.08E-02 | GAB2,MAP3K8,GSK3B                        | 3           |
| Protein Kinase A Signaling                                                     | 1.71E+00      | 1.25E-02 | ROCK1,CREBBP,SMAD4,GSK3B,PPP3CA          | 5           |
| Epithelial Adherens Junction Signaling                                         | 1.66E+00      | 2.03E-02 | ACTR2,MAGI1,CTNNA1                       | 3           |
| Gαq Signaling                                                                  | 1.64E+00      | 1.78E-02 | ROCK1,GSK3B,PPP3CA                       | 3           |
| Axonal Guidance Signaling                                                      | 1.51E+00      | 1.06E-02 | ROCK1,ACTR2,ADAM19,GSK3B,PPP3CA          | 5           |
| Wnt/β-catenin Signaling                                                        | 1.48E+00      | 1.71E-02 | CREBBP,TLE4,GSK3B                        | 3           |
| Ephrin Receptor Signaling                                                      | 1.46E+00      | 1.48E-02 | ROCK1,ACTR2,CREBBP                       | 3           |
| Role of Macrophages, Fibroblasts and Endothelial Cells in Rheumatoid Arthritis | 1.44E+00      | 1.19E-02 | ROCK1,CREBBP,GSK3B,PPP3CA                | 4           |
| NRF2-mediated Oxidative Stress Response                                        | 1.43E+00      | 1.56E-02 | CUL3,CREBBP,GSK3B                        | 3           |
| Regulation of the Epithelial-Mesenchymal Transition Pathway                    | 1.42E+00      | 1.56E-02 | RBPJ,SMAD4,GSK3B                         | 3           |
| Leukocyte Extravasation Signaling                                              | 1.33E+00      | 1.45E-02 | ROCK1,ARHGAP5,CTNNA1                     | 3           |
| Glucocorticoid Receptor Signaling                                              | 1.04E+00      | 1.02E-02 | CREBBP,SMAD4,PPP3CA                      | 3           |
| Xenobiotic Metabolism Signaling                                                | 9.49E-01      | 1.00E-02 | CUL3,CREBBP,MAP3K8                       | 3           |

**Table S6: Sets of genes with transposon insertions in multiple mice based on frequent itemset mining**

| Itemset # | Gene set                       | Mouse IDs                                | FDR q-value | -Log (p-value) |
|-----------|--------------------------------|------------------------------------------|-------------|----------------|
| 1         | Cobl, Cpxcr1, Gm20268, Cadm2   | 1152-Lng-A-T, 1223-Lng-B-T, 901-Lng-D-T  | 0.260829    | 13.37          |
| 2         | Cdh8, Cntnap5a, Socs6, Mbd5    | 1223-Lng-B-T, 846-Lng-A-T, 901-Lng-B-T   | 0.359576    | 10.84          |
| 3         | Cntnap5a, Cadm2, Socs6, Grb14  | 1223-Lng-B-T, 846-Lng-A-T, 901-Lng-D-T   | 0.256512    | 10.45          |
| 4         | Serinc3, Luzp2, Svil, Tcf4     | 1065-Lng-B-T, 1090-Lng-B-T, 1223-Lng-A-T | 0.223951    | 10.08          |
| 5         | Serinc3, Cdh8, Lrp1b, Mir1186b | 1065-Lng-A-T, 1152-Lng-A-T, 1223-Lng-B-T | 0.459091    | 8.43           |
| 6         | Cdh8, Cntnap5a, Psme4          | 1188-Lng-A-T, 846-Lng-A-T, 901-Lng-B-T   | 0.843428    | 6.39           |
| 7         | Serinc3, Flrt2, Magi3          | 1151-Lng-A-T, 1152-Lng-A-T, 846-Lng-A-T  | 0.765641    | 5.84           |
| 8         | Serinc3, Foxa2, Gpbp1          | 1100-Lng-A-T, 1188-Lng-A-T, 1223-Lng-C-T | 0.765641    | 5.84           |
| 9         | Cdh8, Cntnap5a, Rock1          | 1188-Lng-A-T, 1223-Lng-B-T, 901-Lng-B-T  | 0.709821    | 5.58           |
| 10        | Serinc3, Gm10440, Wnk1         | 1152-Lng-A-T, 1188-Lng-A-T, 901-Lng-C-T  | 0.808772    | 5.04           |

**Table S7: Differentially expressed genes in A549 cells with CUL3, PTEN, or CUL3 and PTEN knocked down**

|       |    |    |     |    |     |
|-------|----|----|-----|----|-----|
| Up    | 28 | 6  | 44  | 8  | 44  |
| Down  | 59 | 5  | 76  | 4  | 68  |
| Total | 87 | 11 | 120 | 12 | 112 |

| NCBI Gene Symbol | Entrez Gene ID | CUL3 vs Control: Fold-Change | PTEN vs Control: Fold-Change | CUL3/PTEN vs Control: Fold-Change | CUL3/PTEN vs CUL3: Fold-Change | CUL3/PTEN vs PTEN: Fold-Change | # of conditions |
|------------------|----------------|------------------------------|------------------------------|-----------------------------------|--------------------------------|--------------------------------|-----------------|
| AARD             | 441376         | 2.7                          |                              | 2.2                               |                                | 2.2                            | 3               |
| ACY1             | 95             |                              |                              | -2.0                              |                                |                                | 1               |
| AHNAK2           | 113146         | -2.3                         |                              | -2.3                              |                                | -2.2                           | 3               |
| ALDH1A1          | 216            |                              |                              | -2.8                              |                                | -2.4                           | 2               |
| ALDOC            | 230            |                              |                              |                                   |                                | -2.1                           | 1               |
| ANKRD34B         | 340120         | -8.9                         | -2.7                         | -10.0                             |                                | -3.7                           | 4               |
| ANXA2R           | 389289         | -2.0                         |                              | -2.5                              |                                | -2.1                           | 3               |
| ARHGAP21         | 57584          | -2.7                         |                              | -2.1                              |                                | -2.1                           | 3               |
| ASNS             | 440            |                              |                              |                                   |                                | 2.3                            | 1               |
| B4GALT7          | 11285          |                              |                              | 2.1                               |                                |                                | 1               |
| BAMBI            | 25805          | 2.9                          |                              | 2.9                               |                                | 3.3                            | 3               |
| BCHE             | 590            |                              |                              | 2.9                               |                                | 2.7                            | 2               |
| BHLHE40          | 8553           | -3.1                         |                              | -2.6                              |                                | -2.4                           | 3               |
| BMP7             | 655            | -2.1                         |                              |                                   |                                |                                | 1               |
| C11orf88         | 399949         |                              | 2.6                          |                                   |                                | -2.4                           | 2               |
| CABLES1          | 91768          |                              |                              | -2.4                              |                                |                                | 1               |
| CCNA1            | 8900           | 3.2                          |                              | 2.7                               |                                | 2.6                            | 3               |
| CD74             | 972            | -2.4                         |                              | -2.3                              |                                |                                | 2               |
| CHGB             | 1114           |                              | 2.3                          |                                   |                                |                                | 1               |
| CKB              | 1152           | -2.1                         |                              | -2.7                              |                                | -2.7                           | 3               |
| CNTNAP1          | 8506           | 2.0                          |                              |                                   |                                |                                | 1               |
| COL5A2           | 1290           |                              |                              |                                   |                                | 2.5                            | 1               |
| COLGALT2         | 23127          | 3.7                          |                              | 3.0                               |                                | 3.3                            | 3               |
| COX20            | 116228         | -2.5                         | -2.3                         | -2.4                              |                                |                                | 3               |
| CRIP2            | 1397           |                              |                              | -3.7                              | -2.0                           | -3.0                           | 3               |
| CTGF             | 1490           | 2.1                          |                              | 2.8                               |                                | 3.2                            | 3               |
| CXXC5            | 51523          | -2.4                         |                              | -3.0                              |                                | -2.5                           | 3               |
| CYB5B            | 80777          | -2.1                         |                              | -2.4                              |                                | -2.3                           | 3               |
| CYBRD1           | 79901          | 2.6                          |                              | 2.3                               |                                | 2.3                            | 3               |
| CYR61            | 3491           | 2.1                          |                              |                                   |                                | 2.2                            | 2               |
| DBNDD2           | 55861          | -2.3                         |                              | -2.7                              |                                |                                | 2               |
| DDIT4            | 54541          |                              |                              |                                   | 2.2                            |                                | 1               |
| DHCR24           | 1718           |                              |                              |                                   |                                | -2.1                           | 1               |
| DHFRP2           | 729816         | -2.2                         |                              | -2.1                              |                                |                                | 2               |
| DKK1             | 22943          | -3.1                         | 3.8                          | -3.9                              |                                | -14.7                          | 4               |
| DNAJB1           | 3337           |                              |                              |                                   |                                | -2.0                           | 1               |
| DUSP6            | 1848           | -3.2                         |                              | -3.0                              |                                | -2.5                           | 3               |
| EFCAB4A          | 283229         | -2.4                         |                              | -2.3                              |                                | -2.3                           | 3               |
| EGR1             | 1958           | -4.2                         |                              | -5.9                              |                                | -6.5                           | 3               |
| FABP5            | 2171           |                              |                              | -2.0                              |                                | -2.2                           | 2               |
| FABP5P2          | 729163         | -2.0                         |                              | -2.9                              |                                | -2.8                           | 3               |
| FAH              | 2184           |                              |                              | 2.0                               |                                | 2.0                            | 2               |
| FAM129A          | 116496         | 2.7                          |                              | 3.8                               |                                | 3.1                            | 3               |
| FAM133A          | 286499         |                              |                              |                                   |                                | 2.8                            | 1               |
| FAM84B           | 157638         |                              |                              | 2.2                               |                                | 2.3                            | 2               |
| FGF2             | 2247           | -4.0                         |                              | -4.3                              |                                | -4.5                           | 3               |
| FGF9             | 2254           | 3.5                          |                              | 3.2                               |                                | 2.6                            | 3               |
| FGFR3            | 2261           | -3.6                         |                              | -4.2                              |                                | -3.5                           | 3               |
| FNDC3B           | 64778          | 2.6                          |                              | 2.2                               |                                | 2.1                            | 3               |
| FOS              | 2353           |                              |                              | -2.8                              |                                | -3.9                           | 2               |
| FOSB             | 2354           |                              |                              |                                   |                                | -2.2                           | 1               |
| FOXA1            | 3169           | -3.1                         |                              | -3.0                              |                                | -2.8                           | 3               |
| FTH1P20          | 729009         |                              |                              |                                   |                                | 2.0                            | 1               |
| GAMT             | 2593           |                              |                              | -2.2                              |                                |                                | 1               |
| GCLM             | 2730           |                              |                              | 2.5                               |                                | 2.2                            | 2               |
| GLA              | 2717           |                              |                              | 2.5                               |                                | 2.1                            | 2               |
| GLRB             | 2743           | -5.8                         |                              | -5.0                              |                                | -5.2                           | 3               |
| GRIA2            | 2891           | -2.5                         |                              | -2.6                              |                                | -4.4                           | 3               |
| H19              | 283120         |                              |                              |                                   |                                | -2.1                           | 1               |
| HES6             | 55502          | -2.3                         |                              |                                   |                                |                                | 1               |
| HEY1             | 23462          | -3.8                         |                              | -6.7                              |                                | -7.4                           | 3               |
| HLA-B            | 3106           |                              |                              | 2.0                               |                                |                                | 1               |
| HMMR             | 3161           |                              |                              | -2.2                              |                                |                                | 1               |
| HMOX1            | 3162           |                              |                              | 4.7                               | 2.4                            | 4.5                            | 3               |
| HOXA-AS2         | 285943         | -2.1                         |                              | -2.2                              |                                |                                | 2               |
| HOXA2            | 3199           | -3.1                         |                              | -3.2                              |                                | -2.8                           | 3               |
| HOXA4            | 3201           | -2.2                         |                              | -2.4                              |                                | -2.3                           | 3               |
| HOXA5            | 3202           | -5.2                         |                              | -7.3                              |                                | -6.9                           | 3               |
| HSD17B1          | 3292           |                              |                              |                                   |                                | -2.4                           | 1               |
| IFITM2           | 10581          | -3.0                         |                              | -2.3                              |                                | -2.3                           | 3               |
| IFITM3           | 10410          | -2.6                         |                              | -2.1                              |                                | -2.5                           | 3               |
| INPP1            | 3628           |                              |                              |                                   |                                | -2.2                           | 1               |
| ISL1             | 3670           | 2.9                          |                              | 2.5                               |                                | 3.4                            | 3               |
| JAG2             | 3714           |                              |                              | -2.2                              |                                | -2.1                           | 2               |
| KIF1A            | 547            | 2.2                          |                              | 3.0                               |                                | 2.6                            | 3               |
| KITLG            | 4254           | -3.3                         |                              | -3.5                              |                                | -3.7                           | 3               |

**Table S7: Differentially expressed genes in A549 cells with CUL3, PTEN, or CUL3 and PTEN knocked down**

|              |           |       |      |       |      |       |   |
|--------------|-----------|-------|------|-------|------|-------|---|
| KLF2         | 10365     |       |      |       |      | -2.2  | 1 |
| KLF9         | 687       |       |      | 2.2   |      |       | 1 |
| LAMB1        | 3912      | -4.3  |      | -4.3  |      | -2.3  | 3 |
| LDOC1        | 23641     | 2.1   |      | 2.6   |      | 2.5   | 3 |
| LGALS1       | 3956      |       |      | -3.6  |      | -2.5  | 3 |
| LINC00052    | 145978    |       |      |       |      | 2.3   | 2 |
| LMO4         | 8543      |       |      | 2.4   | 2.2  | 2.4   | 3 |
| LOC100129129 | 100129129 |       |      | 2.1   |      |       | 1 |
| LOC642590    | 642590    | 2.2   |      |       |      | 2.2   | 2 |
| LOC646347    | 646347    | 2.0   |      |       |      | 2.4   | 2 |
| LYN          | 4067      |       |      | -2.3  |      | -2.1  | 2 |
| MEGF9        | 1955      |       |      | -2.1  |      |       | 1 |
| METRN        | 79006     |       |      | -2.2  |      |       | 1 |
| MFSD6        | 54842     |       |      |       |      | -2.6  | 1 |
| MRPS28       | 28957     |       |      | -2.0  |      |       | 1 |
| MYOF         | 26509     | -13.4 |      | -12.6 |      | -11.3 | 3 |
| NAB1         | 4664      | -2.0  |      | -2.2  |      | -2.5  | 3 |
| NBPF22P      | 285622    | -3.1  | -3.1 | -3.0  |      |       | 3 |
| NELL2        | 4753      |       |      |       | 2.8  |       | 1 |
| NQO1         | 1728      |       |      | 2.0   |      |       | 1 |
| NR2F1        | 7025      | -2.5  |      |       |      |       | 1 |
| NR2F6        | 2063      |       |      | -2.0  |      | -2.1  | 2 |
| NUDT6        | 11162     | -2.6  |      | -2.5  |      |       | 2 |
| OCEL1        | 79629     | -2.2  |      | -2.9  |      | -2.5  | 3 |
| OMG          | 4974      |       |      | -2.1  |      |       | 1 |
| OSGIN1       | 29948     | 4.9   |      | 7.5   |      | 7.7   | 3 |
| OVOL2        | 58495     |       | -2.2 |       |      |       | 1 |
| PAM          | 5066      | 2.6   |      | 2.4   |      | 2.6   | 3 |
| PANX2        | 56666     |       |      | 2.0   |      | 2.4   | 2 |
| PCDH18       | 54510     |       |      | 2.4   |      | 2.3   | 2 |
| PCED1B       | 91523     | -2.5  |      | -2.4  |      | -2.3  | 3 |
| PDGFC        | 56034     | -7.9  |      |       |      | -5.5  | 2 |
| PIR          | 8544      |       |      |       |      | 2.0   | 1 |
| PLD1         | 5337      | 2.1   |      |       |      | 2.0   | 2 |
| PLEKHG4B     | 153478    | 2.1   |      |       | -2.1 |       | 2 |
| PLEKHO1      | 51177     |       |      |       |      | -2.2  | 1 |
| PPM1H        | 57460     |       |      |       | 2.9  |       | 1 |
| PRKCB        | 5579      | -2.1  |      | -2.1  |      | -2.2  | 3 |
| PROK2        | 60675     | 2.6   |      |       |      |       | 1 |
| PSAT1        | 29968     |       |      | 2.2   |      | 2.3   | 2 |
| PTEN         | 5728      |       | -2.1 |       |      |       | 1 |
| RAB32        | 10981     | -3.4  |      | -5.6  |      | -4.9  | 3 |
| RDX          | 5962      | -2.2  |      | -2.2  |      | -2.1  | 3 |
| RGCC         | 28984     | 6.1   |      | 4.1   |      | 2.4   | 3 |
| RGL1         | 23179     | 2.4   |      | 2.2   |      |       | 2 |
| RHOBTB3      | 22836     | 2.0   |      | 2.2   |      |       | 2 |
| RHOJ         | 57381     |       |      | -2.1  |      | -2.2  | 2 |
| RNY1         | 6084      |       |      | 2.1   |      |       | 1 |
| RNY4         | 6086      |       |      | 3.1   |      | 2.4   | 2 |
| RPRML        | 388394    | -2.3  |      |       |      |       | 1 |
| RRAGD        | 58528     | -3.7  |      | -3.0  |      | -2.8  | 3 |
| RSBN1        | 54665     |       |      | -2.0  |      |       | 1 |
| S100A10      | 6281      | -3.4  | 2.3  |       |      | -3.8  | 3 |
| SCD          | 6319      | -10.0 |      | -6.9  |      | -5.5  | 3 |
| SCG2         | 7857      |       | 2.8  | -2.9  |      | -8.3  | 3 |
| SEL1L3       | 23231     | -11.7 |      | -6.1  |      | -6.5  | 3 |
| SERPINE2     | 5270      |       | 2.2  |       |      | -2.4  | 2 |
| SH3RF1       | 57630     |       |      | -2.1  |      |       | 1 |
| SKAP2        | 8935      | -2.0  |      | -2.0  |      |       | 2 |
| SLC2A3       | 6515      |       |      | 4.2   | 2.4  | 2.6   | 3 |
| SLC30A3      | 7781      | -2.1  |      |       |      |       | 1 |
| SLIT2        | 9353      | -2.0  |      |       |      |       | 1 |
| SMS          | 6611      |       |      |       |      | 2.2   | 1 |
| SNHG6        | 641638    |       |      | -2.0  |      |       | 1 |
| SOCS2        | 8835      |       |      | -2.3  |      | -2.1  | 2 |
| SOSTDC1      | 25928     |       |      | 3.1   |      | 2.6   | 2 |
| SOX18        | 54345     |       |      | -2.1  |      |       | 1 |
| SPP1         | 6696      |       |      | 2.3   | 2.3  | 2.3   | 3 |
| SQSTM1       | 8878      |       |      | 2.1   |      |       | 1 |
| SRGAP1       | 57522     | -2.6  |      | -2.5  |      | -2.5  | 3 |
| SRXN1        | 140809    | 2.0   |      | 3.3   |      | 3.6   | 3 |
| STEAP1B      | 256227    |       |      | 2.0   |      |       | 1 |
| STMN2        | 11075     |       |      | -2.8  |      | -3.2  | 2 |
| STOM         | 2040      | -2.3  |      | -2.2  |      |       | 2 |
| TBC1D4       | 9882      | -2.9  |      | -2.7  |      | -2.6  | 3 |
| TBX2         | 6909      | -2.5  |      | -5.5  | -2.2 | -5.7  | 4 |
| TLE2         | 7089      | -2.2  |      |       |      |       | 1 |
| TNNC1        | 7134      |       |      | -2.1  |      | -2.3  | 2 |
| TP53I3       | 9540      |       |      | -2.2  |      |       | 1 |
| TRO          | 7216      | 4.1   |      | 4.3   |      | 4.5   | 3 |
| TXNRD1       | 7296      | 2.4   |      | 3.3   |      | 3.4   | 3 |
| VGFB         | 7425      |       |      | 2.3   |      |       | 1 |
| ZMIZ1        | 57178     | -2.7  |      | -3.0  |      | -2.8  | 3 |
| ZNF143       | 7702      | -4.6  |      | -4.2  |      | -4.2  | 3 |
| ZNF239       | 8187      | 2.7   |      | 3.0   |      | 3.0   | 3 |

**Table S8: NRF2 pathway genes differentially expressed in A549 CUL3/PTEN knockdown cells**

| NCBI Gene Symbol | Entrez Gene ID | Fold change CUL3/PTEN vs Ctrl <sup>1</sup> | NRF2 Target gene <sup>2</sup> | Sulforaphane induced gene <sup>3</sup> |
|------------------|----------------|--------------------------------------------|-------------------------------|----------------------------------------|
| GCLM             | 2730           | 2.5                                        | Yes                           |                                        |
| HMOX1            | 3162           | 4.7                                        | Yes                           | Yes                                    |
| NQO1             | 1728           | 2.0                                        | Yes                           | Yes                                    |
| OSGIN1           | 29948          | 7.5                                        |                               | Yes                                    |
| PANX2            | 56666          | 2                                          |                               | Yes                                    |
| PRKCB            | 5579           | -2.1                                       | Yes                           |                                        |
| SQSTM1           | 8878           | 2.1                                        | Yes                           | Yes                                    |
| SRXN1            | 140809         | 3.3                                        | Yes                           | Yes                                    |
| TXNRD1           | 7296           | 3.3                                        | Yes                           | Yes                                    |

<sup>1</sup>From Table S7. this publication

<sup>2</sup>Genes were identified as NRF2 target genes by Chorlev. et al., 2012 and were significantly changed in our study

<sup>3</sup>Genes were identified as sulforaphane-induced by Chorlev. et al., 2012 and were significant changed in our study



**Table S9: Top 50 canonical pathways enriched for significantly altered genes in CUL3/PTEN knockdown cells compared to controls**

| Ingenuity Canonical Pathways                                    | -log(p-value) | Ratio    | Molecules                               |
|-----------------------------------------------------------------|---------------|----------|-----------------------------------------|
| NRF2-mediated Oxidative Stress Response                         | 3.85E+00      | 3.59E-02 | HMOX1,FOS,NQO1,SQSTM1,GCLM,TXNRD1,PRKCB |
| Role of Oct4 in Mammalian Embryonic Stem Cell Pluripotency      | 2.56E+00      | 5.77E-02 | SPP1,FOXA1,NR2F6                        |
| CXCR4 Signaling                                                 | 2.55E+00      | 2.87E-02 | FOS,EGR1,LYN,RHOJ,PRKCB                 |
| Vitamin-C Transport                                             | 2.52E+00      | 9.09E-02 | SLC2A3,TXNRD1                           |
| Regulation of the Epithelial-Mesenchymal Transition Pathway     | 2.24E+00      | 2.55E-02 | FGFR3,JAG2,FGF2,EGR1,FGF9               |
| Growth Hormone Signaling                                        | 2.03E+00      | 3.85E-02 | FOS,SOCS2,PRKCB                         |
| Aryl Hydrocarbon Receptor Signaling                             | 1.98E+00      | 2.34E-02 | FOS,ALDH1A1,CCNA1,NQO1                  |
| Prolactin Signaling                                             | 1.94E+00      | 3.57E-02 | FOS,SOCS2,PRKCB                         |
| Glycine Degradation (Creatine Biosynthesis)                     | 1.89E+00      | 1.11E-01 | GAMT                                    |
| Tec Kinase Signaling                                            | 1.81E+00      | 2.17E-02 | FOS,LYN,RHOJ,PRKCB                      |
| FGF Signaling                                                   | 1.77E+00      | 3.19E-02 | FGFR3,FGF2,FGF9                         |
| Bladder Cancer Signaling                                        | 1.75E+00      | 3.09E-02 | FGFR3,FGF2,FGF9                         |
| CDK5 Signaling                                                  | 1.74E+00      | 3.09E-02 | CABLES1,EGR1,LAMB1                      |
| Glutathione Biosynthesis                                        | 1.72E+00      | 9.09E-02 | GCLM                                    |
| Fcγ Receptor-mediated Phagocytosis in Macrophages and Monocytes | 1.68E+00      | 2.83E-02 | HMOX1,LYN,PRKCB                         |
| Antioxidant Action of Vitamin C                                 | 1.68E+00      | 2.70E-02 | HMOX1,SLC2A3,TXNRD1                     |
| Antigen Presentation Pathway                                    | 1.66E+00      | 4.76E-02 | HLA-B,CD74                              |
| Notch Signaling                                                 | 1.63E+00      | 4.65E-02 | JAG2,HEY1                               |
| IGF-1 Signaling                                                 | 1.63E+00      | 2.80E-02 | FOS,CTGF,SOCS2                          |
| RAR Activation                                                  | 1.61E+00      | 2.05E-02 | FOS,ALDH1A1,NR2F6,PRKCB                 |
| Creatine-phosphate Biosynthesis                                 | 1.60E+00      | 1.11E-01 | CKB                                     |
| Heme Degradation                                                | 1.60E+00      | 9.09E-02 | HMOX1                                   |
| Serine Biosynthesis                                             | 1.60E+00      | 7.69E-02 | PSAT1                                   |
| Neuropathic Pain Signaling In Dorsal Horn Neurons               | 1.59E+00      | 2.75E-02 | FOS,GRIA2,PRKCB                         |
| Cholecystokinin/Gastrin-mediated Signaling                      | 1.58E+00      | 2.83E-02 | FOS,RHOJ,PRKCB                          |
| MIF Regulation of Innate Immunity                               | 1.57E+00      | 3.85E-02 | FOS,CD74                                |
| UVC-Induced MAPK Signaling                                      | 1.53E+00      | 4.55E-02 | FOS,PRKCB                               |
| IL-8 Signaling                                                  | 1.52E+00      | 1.78E-02 | HMOX1,FOS,RHOJ,PRKCB                    |
| Role of Tissue Factor in Cancer                                 | 1.51E+00      | 2.31E-02 | CTGF,EGR1,LYN                           |
| Thioredoxin Pathway                                             | 1.50E+00      | 1.25E-01 | TXNRD1                                  |
| Tyrosine Degradation I                                          | 1.50E+00      | 6.67E-02 | FAH                                     |
| Superoxide Radicals Degradation                                 | 1.42E+00      | 1.25E-01 | NQO1                                    |
| Superpathway of Serine and Glycine Biosynthesis I               | 1.42E+00      | 5.56E-02 | PSAT1                                   |
| Glycoaminoglycan-protein Linkage Region Biosynthesis            | 1.36E+00      | 6.25E-02 | B4GALT7                                 |
| UVB-Induced MAPK Signaling                                      | 1.36E+00      | 3.45E-02 | FOS,PRKCB                               |
| PI3K Signaling in B Lymphocytes                                 | 1.35E+00      | 2.10E-02 | FOS,LYN,PRKCB                           |
| Thrombopoietin Signaling                                        | 1.32E+00      | 3.12E-02 | FOS,PRKCB                               |
| GNRH Signaling                                                  | 1.32E+00      | 1.96E-02 | FOS,EGR1,PRKCB                          |
| Glioma Invasiveness Signaling                                   | 1.29E+00      | 3.03E-02 | HMMR,RHOJ                               |
| Phospholipase C Signaling                                       | 1.28E+00      | 1.51E-02 | HMOX1,LYN,RHOJ,PRKCB                    |
| Synaptic Long Term Depression                                   | 1.26E+00      | 1.85E-02 | GRIA2,LYN,PRKCB                         |
| Hepatic Fibrosis / Hepatic Stellate Cell Activation             | 1.24E+00      | 1.94E-02 | CTGF,FGF2,BAMBI                         |
| GM-CSF Signaling                                                | 1.22E+00      | 2.94E-02 | LYN,PRKCB                               |
| CCR5 Signaling in Macrophages                                   | 1.22E+00      | 2.06E-02 | FOS,PRKCB                               |
| Embryonic Stem Cell Differentiation into Cardiac Lineages       | 1.21E+00      | 1.00E-01 | ISL1                                    |
| Oleate Biosynthesis II (Animals)                                | 1.21E+00      | 5.26E-02 | SCD                                     |
| PXR/RXR Activation                                              | 1.21E+00      | 2.17E-02 | SCD,ALDH1A1                             |
| Gl $\alpha$ q Signaling                                         | 1.18E+00      | 1.75E-02 | HMOX1,RHOJ,PRKCB                        |
| JAK/Stat Signaling                                              | 1.16E+00      | 2.82E-02 | FOS,SOCS2                               |
| Erythropoietin Signaling                                        | 1.16E+00      | 2.53E-02 | FOS,PRKCB                               |

**Table S10: Top 50 canonical pathways enriched for significantly altered genes in CUL3 knockdown cells compared to controls**

| Ingenuity Canonical Pathways                                                   | <b>-log(p-value)</b> | <b>Ratio</b> | <b>Molecules</b>              |
|--------------------------------------------------------------------------------|----------------------|--------------|-------------------------------|
| Bladder Cancer Signaling                                                       | 3.22E+00             | 4.12E-02     | FGFR3,FGF2,FGF9,PDGFC         |
| Human Embryonic Stem Cell Pluripotency                                         | 2.54E+00             | 2.47E-02     | FGFR3,FGF2,BMP7,PDGFC         |
| Hepatic Fibrosis / Hepatic Stellate Cell Activation                            | 2.48E+00             | 2.58E-02     | CTGF,FGF2,BAMBI,PDGFC         |
| FGF Signaling                                                                  | 2.18E+00             | 3.19E-02     | FGFR3,FGF2,FGF9               |
| Factors Promoting Cardiogenesis in Vertebrates                                 | 2.16E+00             | 3.03E-02     | BMP7,DKK1,PRKCB               |
| Regulation of the Epithelial-Mesenchymal Transition Pathway                    | 2.08E+00             | 2.04E-02     | FGFR3,FGF2,EGR1,FGF9          |
| Role of Tissue Factor in Cancer                                                | 1.91E+00             | 2.31E-02     | CTGF,EGR1,CYR61               |
| Actin Cytoskeleton Signaling                                                   | 1.84E+00             | 1.65E-02     | FGF2,FGF9,RDX,PDGFC           |
| Role of Oct4 in Mammalian Embryonic Stem Cell Pluripotency                     | 1.78E+00             | 3.85E-02     | NR2F1,FOXA1                   |
| Creatine-phosphate Biosynthesis                                                | 1.75E+00             | 1.11E-01     | CKB                           |
| Thioredoxin Pathway                                                            | 1.65E+00             | 1.25E-01     | TXNRD1                        |
| Macropinocytosis Signaling                                                     | 1.43E+00             | 2.60E-02     | PDGFC,PRKCB                   |
| Role of Macrophages, Fibroblasts and Endothelial Cells in Rheumatoid Arthritis | 1.41E+00             | 1.17E-02     | FGF2,DKK1,PDGFC,PRKCB         |
| Axonal Guidance Signaling                                                      | 1.38E+00             | 1.03E-02     | SRGAP1,BMP7,SLIT2,PDGFC,PRKCB |
| Embryonic Stem Cell Differentiation into Cardiac Lineages                      | 1.36E+00             | 1.00E-01     | ISL1                          |
| Oleate Biosynthesis II (Animals)                                               | 1.36E+00             | 5.26E-02     | SCD                           |
| Acute Myeloid Leukemia Signaling                                               | 1.34E+00             | 2.38E-02     | KITLG,CCNA1                   |
| PDGF Signaling                                                                 | 1.33E+00             | 2.33E-02     | PDGFC,PRKCB                   |
| mTOR Signaling                                                                 | 1.32E+00             | 1.41E-02     | PDGFC,PLD1,PRKCB              |
| Clathrin-mediated Endocytosis Signaling                                        | 1.31E+00             | 1.52E-02     | FGF2,FGF9,PDGFC               |
| IL-8 Signaling                                                                 | 1.31E+00             | 1.33E-02     | PDGFC,PLD1,PRKCB              |
| Hematopoiesis from Multipotent Stem Cells                                      | 1.28E+00             | 8.33E-02     | KITLG                         |
| Choline Biosynthesis III                                                       | 1.25E+00             | 4.55E-02     | PLD1                          |
| Vitamin-C Transport                                                            | 1.25E+00             | 4.55E-02     | TXNRD1                        |
| CDK5 Signaling                                                                 | 1.24E+00             | 2.06E-02     | EGR1,LAMB1                    |
| VEGF Signaling                                                                 | 1.22E+00             | 1.83E-02     | PDGFC,PRKCB                   |
| PPAR Signaling                                                                 | 1.21E+00             | 1.87E-02     | NR2F1,PDGFC                   |
| Fc $\gamma$ Receptor-mediated Phagocytosis in Macrophages and Monocytes        | 1.19E+00             | 1.89E-02     | PLD1,PRKCB                    |
| Antioxidant Action of Vitamin C                                                | 1.19E+00             | 1.80E-02     | PLD1,TXNRD1                   |
| Glioma Signaling                                                               | 1.18E+00             | 1.77E-02     | PDGFC,PRKCB                   |
| Nitric Oxide Signaling in the Cardiovascular System                            | 1.17E+00             | 1.60E-02     | PDGFC,PRKCB                   |
| IGF-1 Signaling                                                                | 1.16E+00             | 1.87E-02     | CTGF,CYR61                    |
| Amyotrophic Lateral Sclerosis Signaling                                        | 1.15E+00             | 1.59E-02     | GRIA2,PDGFC                   |
| Neuropathic Pain Signaling In Dorsal Horn Neurons                              | 1.14E+00             | 1.83E-02     | GRIA2,PRKCB                   |
| Pancreatic Adenocarcinoma Signaling                                            | 1.09E+00             | 1.56E-02     | PDGFC,PLD1                    |
| Cardiomyocyte Differentiation via BMP Receptors                                | 1.09E+00             | 4.35E-02     | BMP7                          |
| Synaptic Long Term Potentiation                                                | 1.02E+00             | 1.54E-02     | GRIA2,PRKCB                   |
| p70S6K Signaling                                                               | 1.01E+00             | 1.52E-02     | PLD1,PRKCB                    |
| RhoA Signaling                                                                 | 9.96E-01             | 1.56E-02     | RDX,PLD1                      |
| Estrogen-mediated S-phase Entry                                                | 9.91E-01             | 3.57E-02     | CCNA1                         |
| eNOS Signaling                                                                 | 9.72E-01             | 1.29E-02     | CCNA1,PDGFC                   |
| Antiproliferative Role of TOB in T Cell Signaling                              | 9.58E-01             | 3.85E-02     | CCNA1                         |
| GNRH Signaling                                                                 | 9.55E-01             | 1.31E-02     | EGR1,PRKCB                    |
| Ovarian Cancer Signaling                                                       | 9.38E-01             | 1.32E-02     | FGF9,PDGFC                    |
| Aryl Hydrocarbon Receptor Signaling                                            | 9.22E-01             | 1.17E-02     | NR2F1,CCNA1                   |
| Synaptic Long Term Depression                                                  | 9.17E-01             | 1.23E-02     | GRIA2,PRKCB                   |
| Hematopoiesis from Pluripotent Stem Cells                                      | 8.99E-01             | 1.59E-02     | KITLG                         |
| MIF-mediated Glucocorticoid Regulation                                         | 8.73E-01             | 2.38E-02     | CD74                          |
| G $\beta$ q Signaling                                                          | 8.61E-01             | 1.17E-02     | PLD1,PRKCB                    |
| Circadian Rhythm Signaling                                                     | 8.61E-01             | 2.63E-02     | BHLHE40                       |
