# Supplementary material
Source: PubMed Central journal article supplement (PMC4543426)
Supplement: NIHMS693711-supplement-3.pdf [file NIHMS693711-supplement-3.pdf]

**Table S2: SB Insertion regions**

| <b>Chromo<br/>some</b> | <b>Start<br/>address1</b> | <b>End<br/>Address</b> | <b>Library</b> | <b># of<br/>reads</b> | <b>Full address</b>  |
|------------------------|---------------------------|------------------------|----------------|-----------------------|----------------------|
| chr1                   | 3191050                   | 3191150                | 1072-Lng-A-T   | 201                   | chr1:3191050-3191150 |
| chr1                   | 3245550                   | 3245650                | 1223-Lng-C-T   | 43                    | chr1:3245550-3245650 |
| chr1                   | 3676750                   | 3676850                | 1065-Lng-A-T   | 104                   | chr1:3676750-3676850 |
| chr1                   | 3865750                   | 3865850                | 1223-Lng-A-T   | 235                   | chr1:3865750-3865850 |
| chr1                   | 3918250                   | 3918350                | 1152-Lng-A-T   | 65                    | chr1:3918250-3918350 |
| chr1                   | 3989550                   | 3989650                | 1072-Lng-A-T   | 79                    | chr1:3989550-3989650 |
| chr1                   | 4098850                   | 4098950                | 1004-Lng-A-T   | 72                    | chr1:4098850-4098950 |
| chr1                   | 4256050                   | 4256150                | 1065-Lng-A-T   | 85                    | chr1:4256050-4256150 |
| chr1                   | 4563850                   | 4563950                | 1072-Lng-A-T   | 108                   | chr1:4563850-4563950 |
| chr1                   | 4574350                   | 4574450                | 1065-Lng-B-T   | 50                    | chr1:4574350-4574450 |
| chr1                   | 4809250                   | 4809350                | 846-Lng-A-T    | 934                   | chr1:4809250-4809350 |
| chr1                   | 4835250                   | 4835350                | 1151-Lng-A-T   | 66                    | chr1:4835250-4835350 |
| chr1                   | 4852850                   | 4852950                | 1188-Lng-A-T   | 126                   | chr1:4852850-4852950 |
| chr1                   | 5077250                   | 5077350                | 1065-Lng-B-T   | 44                    | chr1:5077250-5077350 |
| chr1                   | 5084850                   | 5084950                | 1065-Lng-B-T   | 74                    | chr1:5084850-5084950 |
| chr1                   | 5153550                   | 5153650                | 1100-Lng-A-T   | 53                    | chr1:5153550-5153650 |
| chr1                   | 5212150                   | 5212250                | 1090-Lng-A-T   | 80                    | chr1:5212150-5212250 |
| chr1                   | 5252250                   | 5252350                | 1152-Lng-A-T   | 78                    | chr1:5252250-5252350 |
| chr1                   | 5412250                   | 5412350                | 1223-Lng-D-T   | 41                    | chr1:5412250-5412350 |
| chr1                   | 5597250                   | 5597350                | 1065-Lng-A-T   | 60                    | chr1:5597250-5597350 |
| chr1                   | 5657150                   | 5657250                | 1065-Lng-B-T   | 148                   | chr1:5657150-5657250 |
| chr1                   | 5714750                   | 5714850                | 1090-Lng-A-T   | 56                    | chr1:5714750-5714850 |
| chr1                   | 5889750                   | 5889850                | 1274-Lng-A-T   | 60                    | chr1:5889750-5889850 |
| chr1                   | 6198450                   | 6198550                | 846-Lng-A-T    | 185                   | chr1:6198450-6198550 |
| chr1                   | 6212250                   | 6212350                | 1223-Lng-C-T   | 52                    | chr1:6212250-6212350 |
| chr1                   | 6227250                   | 6227350                | 1100-Lng-A-T   | 92                    | chr1:6227250-6227350 |
| chr1                   | 6250150                   | 6250250                | 1090-Lng-A-T   | 80                    | chr1:6250150-6250250 |
| chr1                   | 6260650                   | 6260750                | 901-Lng-A-T    | 115                   | chr1:6260650-6260750 |
| chr1                   | 6366950                   | 6367050                | 1274-Lng-A-T   | 206                   | chr1:6366950-6367050 |
| chr1                   | 6380750                   | 6380850                | 1090-Lng-A-T   | 80                    | chr1:6380750-6380850 |
| chr1                   | 6484650                   | 6484750                | 1090-Lng-A-T   | 125                   | chr1:6484650-6484750 |
| chr1                   | 6721250                   | 6721350                | 1004-Lng-A-T   | 92                    | chr1:6721250-6721350 |
| chr1                   | 6761450                   | 6761550                | 1151-Lng-A-T   | 77                    | chr1:6761450-6761550 |
| chr1                   | 7088450                   | 7088550                | 1065-Lng-A-T   | 249                   | chr1:7088450-7088550 |
| chr1                   | 7099050                   | 7099150                | 1090-Lng-B-T   | 631                   | chr1:7099050-7099150 |
| chr1                   | 7303950                   | 7304050                | 1065-Lng-A-T   | 73                    | chr1:7303950-7304050 |
| chr1                   | 7534350                   | 7534450                | 1065-Lng-C-T   | 73                    | chr1:7534350-7534450 |
| chr1                   | 8063750                   | 8063850                | 901-Lng-B-T    | 38                    | chr1:8063750-8063850 |
| chr1                   | 8066250                   | 8066350                | 1167-Lng-A-T   | 48                    | chr1:8066250-8066350 |
| chr1                   | 8295650                   | 8295750                | 1065-Lng-A-T   | 78                    | chr1:8295650-8295750 |
| chr1                   | 8337850                   | 8337950                | 846-Lng-A-T    | 205                   | chr1:8337850-8337950 |
| chr1                   | 8488550                   | 8488650                | 1188-Lng-A-T   | 182                   | chr1:8488550-8488650 |
| chr1                   | 8549850                   | 8549950                | 1065-Lng-A-T   | 76                    | chr1:8549850-8549950 |

**Table S2: SB Insertion regions**

|      |          |          |              |       |                        |
|------|----------|----------|--------------|-------|------------------------|
| chr1 | 8769450  | 8769550  | 1100-Lng-A-T | 68    | chr1:8769450-8769550   |
| chr1 | 8885650  | 8885750  | 846-Lng-A-T  | 53    | chr1:8885650-8885750   |
| chr1 | 8900650  | 8900750  | 1090-Lng-A-T | 102   | chr1:8900650-8900750   |
| chr1 | 8957250  | 8957350  | 1152-Lng-A-T | 69    | chr1:8957250-8957350   |
| chr1 | 8982950  | 8983050  | 901-Lng-C-T  | 63    | chr1:8982950-8983050   |
| chr1 | 9076050  | 9076150  | 1004-Lng-A-T | 269   | chr1:9076050-9076150   |
| chr1 | 9120250  | 9120350  | 1065-Lng-A-T | 44    | chr1:9120250-9120350   |
| chr1 | 9262750  | 9262850  | 901-Lng-A-T  | 79    | chr1:9262750-9262850   |
| chr1 | 9269550  | 9269650  | 1004-Lng-A-T | 77    | chr1:9269550-9269650   |
| chr1 | 9349450  | 9349550  | 1100-Lng-A-T | 89    | chr1:9349450-9349550   |
| chr1 | 9807150  | 9807250  | 901-Lng-C-T  | 53    | chr1:9807150-9807250   |
| chr1 | 9811750  | 9811850  | 1151-Lng-A-T | 70    | chr1:9811750-9811850   |
| chr1 | 9945250  | 9945350  | 1090-Lng-A-T | 63    | chr1:9945250-9945350   |
| chr1 | 10040150 | 10040250 | 1151-Lng-A-T | 11028 | chr1:10040150-10040250 |
| chr1 | 10065550 | 10065650 | 1004-Lng-A-T | 74    | chr1:10065550-10065650 |
| chr1 | 10089450 | 10089550 | 846-Lng-A-T  | 46    | chr1:10089450-10089550 |
| chr1 | 10117650 | 10117750 | 1188-Lng-A-T | 35    | chr1:10117650-10117750 |
| chr1 | 10134050 | 10134150 | 1151-Lng-A-T | 87    | chr1:10134050-10134150 |
| chr1 | 10135350 | 10135450 | 1223-Lng-D-T | 155   | chr1:10135350-10135450 |
| chr1 | 10138350 | 10138450 | 1223-Lng-B-T | 40    | chr1:10138350-10138450 |
| chr1 | 10148550 | 10148650 | 901-Lng-C-T  | 57    | chr1:10148550-10148650 |
| chr1 | 10148550 | 10148650 | 1223-Lng-D-T | 43    | chr1:10148550-10148650 |
| chr1 | 10153250 | 10153350 | 846-Lng-A-T  | 53    | chr1:10153250-10153350 |
| chr1 | 10158950 | 10159050 | 846-Lng-A-T  | 123   | chr1:10158950-10159050 |
| chr1 | 10181750 | 10181850 | 901-Lng-C-T  | 68    | chr1:10181750-10181850 |
| chr1 | 10186350 | 10186450 | 901-Lng-A-T  | 56    | chr1:10186350-10186450 |
| chr1 | 10187350 | 10187450 | 1152-Lng-A-T | 47    | chr1:10187350-10187450 |
| chr1 | 10195650 | 10195750 | 1223-Lng-C-T | 120   | chr1:10195650-10195750 |
| chr1 | 10209550 | 10209650 | 1152-Lng-A-T | 259   | chr1:10209550-10209650 |
| chr1 | 10283350 | 10283450 | 1100-Lng-B-T | 237   | chr1:10283350-10283450 |
| chr1 | 10439850 | 10439950 | 1004-Lng-A-T | 94    | chr1:10439850-10439950 |
| chr1 | 10581150 | 10581250 | 1274-Lng-A-T | 184   | chr1:10581150-10581250 |
| chr1 | 10615050 | 10615150 | 1274-Lng-A-T | 51    | chr1:10615050-10615150 |
| chr1 | 10838250 | 10838350 | 1004-Lng-A-T | 113   | chr1:10838250-10838350 |
| chr1 | 10957750 | 10957850 | 1065-Lng-A-T | 110   | chr1:10957750-10957850 |
| chr1 | 10977050 | 10977150 | 846-Lng-A-T  | 268   | chr1:10977050-10977150 |
| chr1 | 10999150 | 10999250 | 1065-Lng-B-T | 73    | chr1:10999150-10999250 |
| chr1 | 11049550 | 11049650 | 1090-Lng-A-T | 65    | chr1:11049550-11049650 |
| chr1 | 11057250 | 11057350 | 1274-Lng-A-T | 69    | chr1:11057250-11057350 |
| chr1 | 11290750 | 11290850 | 1152-Lng-A-T | 58    | chr1:11290750-11290850 |
| chr1 | 11454850 | 11454950 | 846-Lng-A-T  | 54    | chr1:11454850-11454950 |
| chr1 | 11535750 | 11535850 | 901-Lng-A-T  | 269   | chr1:11535750-11535850 |
| chr1 | 11572950 | 11573050 | 901-Lng-B-T  | 225   | chr1:11572950-11573050 |
| chr1 | 11620650 | 11620750 | 1090-Lng-B-T | 221   | chr1:11620650-11620750 |
| chr1 | 11689350 | 11689450 | 1065-Lng-B-T | 56    | chr1:11689350-11689450 |
| chr1 | 11730750 | 11730850 | 1223-Lng-B-T | 39    | chr1:11730750-11730850 |

**Table S2: SB Insertion regions**

|      |          |          |              |      |                        |
|------|----------|----------|--------------|------|------------------------|
| chr1 | 11833050 | 11833150 | 1223-Lng-B-T | 174  | chr1:11833050-11833150 |
| chr1 | 11991850 | 11991950 | 1090-Lng-B-T | 112  | chr1:11991850-11991950 |
| chr1 | 12004850 | 12004950 | 901-Lng-D-T  | 247  | chr1:12004850-12004950 |
| chr1 | 12235250 | 12235350 | 1072-Lng-A-T | 100  | chr1:12235250-12235350 |
| chr1 | 12303350 | 12303450 | 1188-Lng-A-T | 34   | chr1:12303350-12303450 |
| chr1 | 12388050 | 12388150 | 1072-Lng-A-T | 105  | chr1:12388050-12388150 |
| chr1 | 12440150 | 12440250 | 1065-Lng-C-T | 1689 | chr1:12440150-12440250 |
| chr1 | 12469950 | 12470050 | 1065-Lng-C-T | 86   | chr1:12469950-12470050 |
| chr1 | 12560450 | 12560550 | 901-Lng-D-T  | 266  | chr1:12560450-12560550 |
| chr1 | 12883050 | 12883150 | 1090-Lng-B-T | 293  | chr1:12883050-12883150 |
| chr1 | 13143650 | 13143750 | 1223-Lng-B-T | 58   | chr1:13143650-13143750 |
| chr1 | 13186150 | 13186250 | 1223-Lng-A-T | 69   | chr1:13186150-13186250 |
| chr1 | 13269850 | 13269950 | 1152-Lng-A-T | 122  | chr1:13269850-13269950 |
| chr1 | 13293450 | 13293550 | 1188-Lng-A-T | 43   | chr1:13293450-13293550 |
| chr1 | 13352750 | 13352850 | 901-Lng-A-T  | 95   | chr1:13352750-13352850 |
| chr1 | 13562350 | 13562450 | 1167-Lng-A-T | 65   | chr1:13562350-13562450 |
| chr1 | 13644250 | 13644350 | 1188-Lng-A-T | 410  | chr1:13644250-13644350 |
| chr1 | 13975250 | 13975350 | 1065-Lng-C-T | 70   | chr1:13975250-13975350 |
| chr1 | 14163550 | 14163650 | 1188-Lng-A-T | 76   | chr1:14163550-14163650 |
| chr1 | 14238450 | 14238550 | 901-Lng-D-T  | 896  | chr1:14238450-14238550 |
| chr1 | 14249350 | 14249450 | 1072-Lng-A-T | 111  | chr1:14249350-14249450 |
| chr1 | 14262250 | 14262350 | 1065-Lng-B-T | 95   | chr1:14262250-14262350 |
| chr1 | 14269550 | 14269650 | 1004-Lng-A-T | 50   | chr1:14269550-14269650 |
| chr1 | 14287050 | 14287150 | 1274-Lng-A-T | 148  | chr1:14287050-14287150 |
| chr1 | 14725650 | 14725750 | 846-Lng-A-T  | 104  | chr1:14725650-14725750 |
| chr1 | 14789750 | 14789850 | 901-Lng-B-T  | 215  | chr1:14789750-14789850 |
| chr1 | 15056950 | 15057050 | 1065-Lng-C-T | 63   | chr1:15056950-15057050 |
| chr1 | 15324850 | 15324950 | 1065-Lng-C-T | 121  | chr1:15324850-15324950 |
| chr1 | 15357250 | 15357350 | 901-Lng-B-T  | 201  | chr1:15357250-15357350 |
| chr1 | 15369550 | 15369650 | 1072-Lng-A-T | 76   | chr1:15369550-15369650 |
| chr1 | 15434750 | 15434850 | 1223-Lng-B-T | 52   | chr1:15434750-15434850 |
| chr1 | 15443050 | 15443150 | 1065-Lng-B-T | 85   | chr1:15443050-15443150 |
| chr1 | 15606250 | 15606350 | 1223-Lng-B-T | 49   | chr1:15606250-15606350 |
| chr1 | 15629050 | 15629150 | 901-Lng-D-T  | 357  | chr1:15629050-15629150 |
| chr1 | 15655250 | 15655350 | 901-Lng-D-T  | 216  | chr1:15655250-15655350 |
| chr1 | 15761950 | 15762050 | 1072-Lng-A-T | 60   | chr1:15761950-15762050 |
| chr1 | 15807050 | 15807150 | 1100-Lng-A-T | 111  | chr1:15807050-15807150 |
| chr1 | 15809050 | 15809150 | 901-Lng-B-T  | 149  | chr1:15809050-15809150 |
| chr1 | 15838350 | 15838450 | 846-Lng-A-T  | 113  | chr1:15838350-15838450 |
| chr1 | 16344650 | 16344750 | 1004-Lng-A-T | 56   | chr1:16344650-16344750 |
| chr1 | 16518150 | 16518250 | 1090-Lng-A-T | 46   | chr1:16518150-16518250 |
| chr1 | 16554150 | 16554250 | 901-Lng-C-T  | 38   | chr1:16554150-16554250 |
| chr1 | 16561850 | 16561950 | 1274-Lng-A-T | 98   | chr1:16561850-16561950 |
| chr1 | 16583850 | 16583950 | 1223-Lng-B-T | 43   | chr1:16583850-16583950 |
| chr1 | 16597250 | 16597350 | 1072-Lng-A-T | 203  | chr1:16597250-16597350 |
| chr1 | 16628750 | 16628850 | 1100-Lng-A-T | 58   | chr1:16628750-16628850 |

**Table S2: SB Insertion regions**

|      |          |          |              |      |                        |
|------|----------|----------|--------------|------|------------------------|
| chr1 | 17276350 | 17276450 | 901-Lng-C-T  | 61   | chr1:17276350-17276450 |
| chr1 | 17276550 | 17276650 | 1274-Lng-A-T | 102  | chr1:17276550-17276650 |
| chr1 | 17650250 | 17650350 | 901-Lng-D-T  | 626  | chr1:17650250-17650350 |
| chr1 | 17900450 | 17900550 | 1274-Lng-A-T | 49   | chr1:17900450-17900550 |
| chr1 | 18129450 | 18129550 | 1065-Lng-B-T | 72   | chr1:18129450-18129550 |
| chr1 | 18145850 | 18145950 | 1188-Lng-A-T | 40   | chr1:18145850-18145950 |
| chr1 | 18176150 | 18176250 | 1004-Lng-A-T | 66   | chr1:18176150-18176250 |
| chr1 | 18259750 | 18259850 | 1223-Lng-D-T | 40   | chr1:18259750-18259850 |
| chr1 | 18976450 | 18976550 | 1065-Lng-A-T | 36   | chr1:18976450-18976550 |
| chr1 | 19010150 | 19010250 | 1223-Lng-C-T | 50   | chr1:19010150-19010250 |
| chr1 | 19156250 | 19156350 | 1004-Lng-A-T | 80   | chr1:19156250-19156350 |
| chr1 | 19333150 | 19333250 | 1223-Lng-B-T | 38   | chr1:19333150-19333250 |
| chr1 | 19418150 | 19418250 | 1065-Lng-B-T | 62   | chr1:19418150-19418250 |
| chr1 | 19547450 | 19547550 | 1065-Lng-A-T | 44   | chr1:19547450-19547550 |
| chr1 | 19779550 | 19779650 | 1065-Lng-A-T | 112  | chr1:19779550-19779650 |
| chr1 | 19881150 | 19881250 | 901-Lng-D-T  | 1186 | chr1:19881150-19881250 |
| chr1 | 20115350 | 20115450 | 1072-Lng-A-T | 51   | chr1:20115350-20115450 |
| chr1 | 20721550 | 20721650 | 1274-Lng-A-T | 71   | chr1:20721550-20721650 |
| chr1 | 20883150 | 20883250 | 1072-Lng-A-T | 52   | chr1:20883150-20883250 |
| chr1 | 20893050 | 20893150 | 1274-Lng-A-T | 56   | chr1:20893050-20893150 |
| chr1 | 20922950 | 20923050 | 901-Lng-C-T  | 42   | chr1:20922950-20923050 |
| chr1 | 21173250 | 21173350 | 1004-Lng-A-T | 62   | chr1:21173250-21173350 |
| chr1 | 21230950 | 21231050 | 901-Lng-A-T  | 96   | chr1:21230950-21231050 |
| chr1 | 21253250 | 21253350 | 846-Lng-A-T  | 144  | chr1:21253250-21253350 |
| chr1 | 21312350 | 21312450 | 1072-Lng-A-T | 88   | chr1:21312350-21312450 |
| chr1 | 21402550 | 21402650 | 1188-Lng-A-T | 34   | chr1:21402550-21402650 |
| chr1 | 21598250 | 21598350 | 1152-Lng-A-T | 45   | chr1:21598250-21598350 |
| chr1 | 21602950 | 21603050 | 1065-Lng-B-T | 95   | chr1:21602950-21603050 |
| chr1 | 21853650 | 21853750 | 1152-Lng-A-T | 83   | chr1:21853650-21853750 |
| chr1 | 22014550 | 22014650 | 1167-Lng-A-T | 69   | chr1:22014550-22014650 |
| chr1 | 22137350 | 22137450 | 1004-Lng-A-T | 75   | chr1:22137350-22137450 |
| chr1 | 22184650 | 22184750 | 1151-Lng-A-T | 68   | chr1:22184650-22184750 |
| chr1 | 22186550 | 22186650 | 1072-Lng-A-T | 96   | chr1:22186550-22186650 |
| chr1 | 22305950 | 22306050 | 1090-Lng-B-T | 71   | chr1:22305950-22306050 |
| chr1 | 22306250 | 22306350 | 1090-Lng-A-T | 47   | chr1:22306250-22306350 |
| chr1 | 22387050 | 22387150 | 1065-Lng-A-T | 91   | chr1:22387050-22387150 |
| chr1 | 22504050 | 22504150 | 901-Lng-B-T  | 210  | chr1:22504050-22504150 |
| chr1 | 22602950 | 22603050 | 846-Lng-A-T  | 678  | chr1:22602950-22603050 |
| chr1 | 22765250 | 22765350 | 1065-Lng-A-T | 128  | chr1:22765250-22765350 |
| chr1 | 22901250 | 22901350 | 1004-Lng-A-T | 109  | chr1:22901250-22901350 |
| chr1 | 22921350 | 22921450 | 846-Lng-A-T  | 74   | chr1:22921350-22921450 |
| chr1 | 23049450 | 23049550 | 1065-Lng-A-T | 141  | chr1:23049450-23049550 |
| chr1 | 23121250 | 23121350 | 1090-Lng-A-T | 63   | chr1:23121250-23121350 |
| chr1 | 23193150 | 23193250 | 1100-Lng-A-T | 129  | chr1:23193150-23193250 |
| chr1 | 23204950 | 23205050 | 1072-Lng-A-T | 50   | chr1:23204950-23205050 |
| chr1 | 23240450 | 23240550 | 1065-Lng-C-T | 93   | chr1:23240450-23240550 |

**Table S2: SB Insertion regions**

|      |          |          |              |     |                        |
|------|----------|----------|--------------|-----|------------------------|
| chr1 | 23264750 | 23264850 | 901-Lng-A-T  | 87  | chr1:23264750-23264850 |
| chr1 | 23286550 | 23286650 | 1100-Lng-A-T | 148 | chr1:23286550-23286650 |
| chr1 | 23373150 | 23373250 | 901-Lng-C-T  | 83  | chr1:23373150-23373250 |
| chr1 | 23403250 | 23403350 | 1223-Lng-C-T | 43  | chr1:23403250-23403350 |
| chr1 | 23516150 | 23516250 | 901-Lng-D-T  | 486 | chr1:23516150-23516250 |
| chr1 | 23853950 | 23854050 | 846-Lng-A-T  | 115 | chr1:23853950-23854050 |
| chr1 | 23890850 | 23890950 | 1223-Lng-B-T | 47  | chr1:23890850-23890950 |
| chr1 | 23930150 | 23930250 | 1065-Lng-B-T | 292 | chr1:23930150-23930250 |
| chr1 | 23938550 | 23938650 | 1274-Lng-A-T | 82  | chr1:23938550-23938650 |
| chr1 | 24141250 | 24141350 | 901-Lng-B-T  | 149 | chr1:24141250-24141350 |
| chr1 | 24169850 | 24169950 | 1152-Lng-A-T | 123 | chr1:24169850-24169950 |
| chr1 | 24812950 | 24813050 | 1065-Lng-A-T | 118 | chr1:24812950-24813050 |
| chr1 | 24977350 | 24977450 | 1065-Lng-C-T | 73  | chr1:24977350-24977450 |
| chr1 | 24999050 | 24999150 | 846-Lng-A-T  | 247 | chr1:24999050-24999150 |
| chr1 | 25417650 | 25417750 | 901-Lng-D-T  | 70  | chr1:25417650-25417750 |
| chr1 | 25452350 | 25452450 | 1100-Lng-A-T | 53  | chr1:25452350-25452450 |
| chr1 | 25514150 | 25514250 | 1100-Lng-B-T | 51  | chr1:25514150-25514250 |
| chr1 | 25550950 | 25551050 | 1223-Lng-B-T | 41  | chr1:25550950-25551050 |
| chr1 | 25617050 | 25617150 | 901-Lng-B-T  | 79  | chr1:25617050-25617150 |
| chr1 | 25875450 | 25875550 | 901-Lng-A-T  | 52  | chr1:25875450-25875550 |
| chr1 | 25907950 | 25908050 | 1223-Lng-B-T | 76  | chr1:25907950-25908050 |
| chr1 | 26384250 | 26384350 | 1065-Lng-B-T | 72  | chr1:26384250-26384350 |
| chr1 | 26386650 | 26386750 | 1100-Lng-A-T | 88  | chr1:26386650-26386750 |
| chr1 | 26542750 | 26542850 | 1223-Lng-C-T | 51  | chr1:26542750-26542850 |
| chr1 | 26557650 | 26557750 | 1090-Lng-B-T | 198 | chr1:26557650-26557750 |
| chr1 | 26731850 | 26731950 | 1090-Lng-A-T | 74  | chr1:26731850-26731950 |
| chr1 | 26779650 | 26779750 | 1188-Lng-A-T | 36  | chr1:26779650-26779750 |
| chr1 | 26823950 | 26824050 | 1065-Lng-B-T | 71  | chr1:26823950-26824050 |
| chr1 | 26824850 | 26824950 | 901-Lng-C-T  | 59  | chr1:26824850-26824950 |
| chr1 | 26923250 | 26923350 | 1065-Lng-B-T | 60  | chr1:26923250-26923350 |
| chr1 | 27292050 | 27292150 | 1065-Lng-B-T | 86  | chr1:27292050-27292150 |
| chr1 | 27513850 | 27513950 | 901-Lng-B-T  | 68  | chr1:27513850-27513950 |
| chr1 | 27697750 | 27697850 | 1152-Lng-A-T | 92  | chr1:27697750-27697850 |
| chr1 | 27955150 | 27955250 | 1065-Lng-B-T | 59  | chr1:27955150-27955250 |
| chr1 | 28013050 | 28013150 | 1274-Lng-A-T | 175 | chr1:28013050-28013150 |
| chr1 | 28021350 | 28021450 | 1100-Lng-A-T | 67  | chr1:28021350-28021450 |
| chr1 | 28224150 | 28224250 | 1004-Lng-A-T | 55  | chr1:28224150-28224250 |
| chr1 | 28262550 | 28262650 | 1065-Lng-A-T | 53  | chr1:28262550-28262650 |
| chr1 | 28289350 | 28289450 | 901-Lng-A-T  | 80  | chr1:28289350-28289450 |
| chr1 | 28326650 | 28326750 | 1100-Lng-B-T | 57  | chr1:28326650-28326750 |
| chr1 | 28390450 | 28390550 | 1065-Lng-B-T | 170 | chr1:28390450-28390550 |
| chr1 | 28469050 | 28469150 | 1100-Lng-A-T | 66  | chr1:28469050-28469150 |
| chr1 | 28527550 | 28527650 | 901-Lng-A-T  | 64  | chr1:28527550-28527650 |
| chr1 | 28568550 | 28568650 | 1223-Lng-A-T | 222 | chr1:28568550-28568650 |
| chr1 | 28590950 | 28591050 | 1004-Lng-A-T | 134 | chr1:28590950-28591050 |
| chr1 | 28653950 | 28654050 | 1072-Lng-A-T | 61  | chr1:28653950-28654050 |

**Table S2: SB Insertion regions**

|      |          |          |              |     |                        |
|------|----------|----------|--------------|-----|------------------------|
| chr1 | 29104150 | 29104250 | 1188-Lng-A-T | 35  | chr1:29104150-29104250 |
| chr1 | 29186950 | 29187050 | 901-Lng-D-T  | 379 | chr1:29186950-29187050 |
| chr1 | 29287150 | 29287250 | 1188-Lng-A-T | 122 | chr1:29287150-29287250 |
| chr1 | 29338850 | 29338950 | 1004-Lng-A-T | 96  | chr1:29338850-29338950 |
| chr1 | 29353250 | 29353350 | 1004-Lng-A-T | 99  | chr1:29353250-29353350 |
| chr1 | 29555950 | 29556050 | 901-Lng-B-T  | 254 | chr1:29555950-29556050 |
| chr1 | 29776150 | 29776250 | 1188-Lng-A-T | 43  | chr1:29776150-29776250 |
| chr1 | 29859750 | 29859850 | 1090-Lng-A-T | 51  | chr1:29859750-29859850 |
| chr1 | 29964550 | 29964650 | 1065-Lng-C-T | 73  | chr1:29964550-29964650 |
| chr1 | 30046150 | 30046250 | 1072-Lng-A-T | 100 | chr1:30046150-30046250 |
| chr1 | 30227850 | 30227950 | 901-Lng-A-T  | 76  | chr1:30227850-30227950 |
| chr1 | 30374750 | 30374850 | 1100-Lng-A-T | 59  | chr1:30374750-30374850 |
| chr1 | 30885550 | 30885650 | 901-Lng-A-T  | 101 | chr1:30885550-30885650 |
| chr1 | 30891550 | 30891650 | 846-Lng-A-T  | 194 | chr1:30891550-30891650 |
| chr1 | 30922850 | 30922950 | 901-Lng-C-T  | 56  | chr1:30922850-30922950 |
| chr1 | 31198250 | 31198350 | 1072-Lng-A-T | 75  | chr1:31198250-31198350 |
| chr1 | 31434550 | 31434650 | 1152-Lng-A-T | 187 | chr1:31434550-31434650 |
| chr1 | 31600550 | 31600650 | 1090-Lng-B-T | 575 | chr1:31600550-31600650 |
| chr1 | 31604650 | 31604750 | 1065-Lng-B-T | 97  | chr1:31604650-31604750 |
| chr1 | 31684550 | 31684650 | 846-Lng-A-T  | 91  | chr1:31684550-31684650 |
| chr1 | 31803050 | 31803150 | 1004-Lng-A-T | 63  | chr1:31803050-31803150 |
| chr1 | 31816550 | 31816650 | 1188-Lng-A-T | 45  | chr1:31816550-31816650 |
| chr1 | 32116950 | 32117050 | 1004-Lng-A-T | 57  | chr1:32116950-32117050 |
| chr1 | 32315450 | 32315550 | 901-Lng-A-T  | 83  | chr1:32315450-32315550 |
| chr1 | 32627750 | 32627850 | 901-Lng-A-T  | 52  | chr1:32627750-32627850 |
| chr1 | 32945750 | 32945850 | 1188-Lng-A-T | 39  | chr1:32945750-32945850 |
| chr1 | 33183650 | 33183750 | 1065-Lng-C-T | 87  | chr1:33183650-33183750 |
| chr1 | 33253250 | 33253350 | 1065-Lng-B-T | 73  | chr1:33253250-33253350 |
| chr1 | 33295750 | 33295850 | 1065-Lng-A-T | 138 | chr1:33295750-33295850 |
| chr1 | 33378950 | 33379050 | 1223-Lng-D-T | 41  | chr1:33378950-33379050 |
| chr1 | 33455350 | 33455450 | 1065-Lng-C-T | 65  | chr1:33455350-33455450 |
| chr1 | 34197450 | 34197550 | 1223-Lng-D-T | 57  | chr1:34197450-34197550 |
| chr1 | 34255050 | 34255150 | 1072-Lng-A-T | 270 | chr1:34255050-34255150 |
| chr1 | 34333550 | 34333650 | 1152-Lng-A-T | 57  | chr1:34333550-34333650 |
| chr1 | 34357150 | 34357250 | 846-Lng-A-T  | 152 | chr1:34357150-34357250 |
| chr1 | 34801050 | 34801150 | 1151-Lng-A-T | 64  | chr1:34801050-34801150 |
| chr1 | 34850350 | 34850450 | 846-Lng-A-T  | 61  | chr1:34850350-34850450 |
| chr1 | 34884150 | 34884250 | 1223-Lng-C-T | 89  | chr1:34884150-34884250 |
| chr1 | 35165250 | 35165350 | 1090-Lng-A-T | 132 | chr1:35165250-35165350 |
| chr1 | 35289750 | 35289850 | 901-Lng-D-T  | 91  | chr1:35289750-35289850 |
| chr1 | 35573850 | 35573950 | 901-Lng-A-T  | 115 | chr1:35573850-35573950 |
| chr1 | 36080650 | 36080750 | 1188-Lng-A-T | 42  | chr1:36080650-36080750 |
| chr1 | 36248150 | 36248250 | 1004-Lng-A-T | 109 | chr1:36248150-36248250 |
| chr1 | 36251350 | 36251450 | 901-Lng-C-T  | 51  | chr1:36251350-36251450 |
| chr1 | 36402750 | 36402850 | 1151-Lng-A-T | 129 | chr1:36402750-36402850 |
| chr1 | 36682750 | 36682850 | 1072-Lng-A-T | 64  | chr1:36682750-36682850 |

**Table S2: SB Insertion regions**

|      |          |          |              |     |                        |
|------|----------|----------|--------------|-----|------------------------|
| chr1 | 36722350 | 36722450 | 901-Lng-A-T  | 89  | chr1:36722350-36722450 |
| chr1 | 36786150 | 36786250 | 1100-Lng-B-T | 50  | chr1:36786150-36786250 |
| chr1 | 36815250 | 36815350 | 1065-Lng-A-T | 46  | chr1:36815250-36815350 |
| chr1 | 36870950 | 36871050 | 1223-Lng-D-T | 40  | chr1:36870950-36871050 |
| chr1 | 36941950 | 36942050 | 1065-Lng-B-T | 76  | chr1:36941950-36942050 |
| chr1 | 36947650 | 36947750 | 1274-Lng-A-T | 141 | chr1:36947650-36947750 |
| chr1 | 36988750 | 36988850 | 1072-Lng-A-T | 49  | chr1:36988750-36988850 |
| chr1 | 37134250 | 37134350 | 1274-Lng-A-T | 155 | chr1:37134250-37134350 |
| chr1 | 37720550 | 37720650 | 1072-Lng-A-T | 95  | chr1:37720550-37720650 |
| chr1 | 37762750 | 37762850 | 846-Lng-A-T  | 68  | chr1:37762750-37762850 |
| chr1 | 37883450 | 37883550 | 901-Lng-A-T  | 58  | chr1:37883450-37883550 |
| chr1 | 38070250 | 38070350 | 1223-Lng-C-T | 62  | chr1:38070250-38070350 |
| chr1 | 38115850 | 38115950 | 1004-Lng-A-T | 70  | chr1:38115850-38115950 |
| chr1 | 38166350 | 38166450 | 1072-Lng-A-T | 57  | chr1:38166350-38166450 |
| chr1 | 38394350 | 38394450 | 1090-Lng-A-T | 78  | chr1:38394350-38394450 |
| chr1 | 38744850 | 38744950 | 1223-Lng-C-T | 50  | chr1:38744850-38744950 |
| chr1 | 38832150 | 38832250 | 1072-Lng-A-T | 208 | chr1:38832150-38832250 |
| chr1 | 39049550 | 39049650 | 1065-Lng-A-T | 46  | chr1:39049550-39049650 |
| chr1 | 39163050 | 39163150 | 1152-Lng-A-T | 258 | chr1:39163050-39163150 |
| chr1 | 39279750 | 39279850 | 901-Lng-B-T  | 56  | chr1:39279750-39279850 |
| chr1 | 39283050 | 39283150 | 1100-Lng-A-T | 56  | chr1:39283050-39283150 |
| chr1 | 39421050 | 39421150 | 1065-Lng-C-T | 106 | chr1:39421050-39421150 |
| chr1 | 39501650 | 39501750 | 1167-Lng-A-T | 46  | chr1:39501650-39501750 |
| chr1 | 39579550 | 39579650 | 901-Lng-A-T  | 382 | chr1:39579550-39579650 |
| chr1 | 39629850 | 39629950 | 1100-Lng-A-T | 81  | chr1:39629850-39629950 |
| chr1 | 39785950 | 39786050 | 1223-Lng-A-T | 218 | chr1:39785950-39786050 |
| chr1 | 39983450 | 39983550 | 1065-Lng-C-T | 69  | chr1:39983450-39983550 |
| chr1 | 40031550 | 40031650 | 901-Lng-C-T  | 40  | chr1:40031550-40031650 |
| chr1 | 40247450 | 40247550 | 1223-Lng-B-T | 34  | chr1:40247450-40247550 |
| chr1 | 40247450 | 40247550 | 1167-Lng-A-T | 55  | chr1:40247450-40247550 |
| chr1 | 40247650 | 40247750 | 1152-Lng-A-T | 154 | chr1:40247650-40247750 |
| chr1 | 40316350 | 40316450 | 1090-Lng-B-T | 153 | chr1:40316350-40316450 |
| chr1 | 40376350 | 40376450 | 1090-Lng-B-T | 604 | chr1:40376350-40376450 |
| chr1 | 40525050 | 40525150 | 1274-Lng-A-T | 106 | chr1:40525050-40525150 |
| chr1 | 40528650 | 40528750 | 1223-Lng-C-T | 48  | chr1:40528650-40528750 |
| chr1 | 40677250 | 40677350 | 1065-Lng-B-T | 69  | chr1:40677250-40677350 |
| chr1 | 41208450 | 41208550 | 1188-Lng-A-T | 43  | chr1:41208450-41208550 |
| chr1 | 41317950 | 41318050 | 1223-Lng-B-T | 41  | chr1:41317950-41318050 |
| chr1 | 41689450 | 41689550 | 901-Lng-D-T  | 47  | chr1:41689450-41689550 |
| chr1 | 41841250 | 41841350 | 1274-Lng-A-T | 93  | chr1:41841250-41841350 |
| chr1 | 42043150 | 42043250 | 901-Lng-A-T  | 58  | chr1:42043150-42043250 |
| chr1 | 42327750 | 42327850 | 1274-Lng-A-T | 55  | chr1:42327750-42327850 |
| chr1 | 42909450 | 42909550 | 1223-Lng-C-T | 169 | chr1:42909450-42909550 |
| chr1 | 42926950 | 42927050 | 901-Lng-D-T  | 372 | chr1:42926950-42927050 |
| chr1 | 42938050 | 42938150 | 846-Lng-A-T  | 100 | chr1:42938050-42938150 |
| chr1 | 42968350 | 42968450 | 1004-Lng-A-T | 61  | chr1:42968350-42968450 |

**Table S2: SB Insertion regions**

|      |          |          |              |      |                        |
|------|----------|----------|--------------|------|------------------------|
| chr1 | 43075350 | 43075450 | 1223-Lng-C-T | 59   | chr1:43075350-43075450 |
| chr1 | 43120150 | 43120250 | 901-Lng-A-T  | 80   | chr1:43120150-43120250 |
| chr1 | 43136150 | 43136250 | 901-Lng-D-T  | 155  | chr1:43136150-43136250 |
| chr1 | 43140450 | 43140550 | 1065-Lng-A-T | 78   | chr1:43140450-43140550 |
| chr1 | 43157450 | 43157550 | 1004-Lng-A-T | 67   | chr1:43157450-43157550 |
| chr1 | 43157850 | 43157950 | 1223-Lng-D-T | 58   | chr1:43157850-43157950 |
| chr1 | 43507850 | 43507950 | 1065-Lng-B-T | 446  | chr1:43507850-43507950 |
| chr1 | 43564950 | 43565050 | 1004-Lng-A-T | 55   | chr1:43564950-43565050 |
| chr1 | 43586750 | 43586850 | 1090-Lng-A-T | 121  | chr1:43586750-43586850 |
| chr1 | 43599650 | 43599750 | 901-Lng-C-T  | 67   | chr1:43599650-43599750 |
| chr1 | 43631850 | 43631950 | 1065-Lng-B-T | 109  | chr1:43631850-43631950 |
| chr1 | 43831250 | 43831350 | 901-Lng-A-T  | 74   | chr1:43831250-43831350 |
| chr1 | 43848150 | 43848250 | 846-Lng-A-T  | 89   | chr1:43848150-43848250 |
| chr1 | 43994850 | 43994950 | 846-Lng-A-T  | 45   | chr1:43994850-43994950 |
| chr1 | 44016750 | 44016850 | 1223-Lng-B-T | 37   | chr1:44016750-44016850 |
| chr1 | 44076650 | 44076750 | 1274-Lng-A-T | 76   | chr1:44076650-44076750 |
| chr1 | 44078850 | 44078950 | 1090-Lng-B-T | 1430 | chr1:44078850-44078950 |
| chr1 | 44179450 | 44179550 | 1004-Lng-A-T | 74   | chr1:44179450-44179550 |
| chr1 | 44253450 | 44253550 | 1152-Lng-A-T | 68   | chr1:44253450-44253550 |
| chr1 | 44276850 | 44276950 | 1065-Lng-C-T | 78   | chr1:44276850-44276950 |
| chr1 | 44353350 | 44353450 | 1072-Lng-A-T | 84   | chr1:44353350-44353450 |
| chr1 | 44654950 | 44655050 | 1065-Lng-B-T | 51   | chr1:44654950-44655050 |
| chr1 | 44860350 | 44860450 | 1151-Lng-A-T | 358  | chr1:44860350-44860450 |
| chr1 | 44920050 | 44920150 | 1152-Lng-A-T | 92   | chr1:44920050-44920150 |
| chr1 | 45028850 | 45028950 | 1072-Lng-A-T | 159  | chr1:45028850-45028950 |
| chr1 | 45415150 | 45415250 | 846-Lng-A-T  | 80   | chr1:45415150-45415250 |
| chr1 | 45874650 | 45874750 | 1223-Lng-A-T | 82   | chr1:45874650-45874750 |
| chr1 | 45925450 | 45925550 | 901-Lng-C-T  | 86   | chr1:45925450-45925550 |
| chr1 | 46106050 | 46106150 | 901-Lng-D-T  | 114  | chr1:46106050-46106150 |
| chr1 | 46826050 | 46826150 | 901-Lng-A-T  | 52   | chr1:46826050-46826150 |
| chr1 | 46922450 | 46922550 | 1100-Lng-A-T | 71   | chr1:46922450-46922550 |
| chr1 | 46941350 | 46941450 | 1274-Lng-A-T | 86   | chr1:46941350-46941450 |
| chr1 | 46988650 | 46988750 | 1100-Lng-B-T | 57   | chr1:46988650-46988750 |
| chr1 | 47116050 | 47116150 | 1090-Lng-A-T | 80   | chr1:47116050-47116150 |
| chr1 | 47363750 | 47363850 | 1065-Lng-B-T | 50   | chr1:47363750-47363850 |
| chr1 | 47483950 | 47484050 | 1004-Lng-A-T | 77   | chr1:47483950-47484050 |
| chr1 | 47591650 | 47591750 | 1065-Lng-B-T | 58   | chr1:47591650-47591750 |
| chr1 | 47599250 | 47599350 | 1090-Lng-A-T | 50   | chr1:47599250-47599350 |
| chr1 | 47750950 | 47751050 | 1072-Lng-A-T | 230  | chr1:47750950-47751050 |
| chr1 | 47978950 | 47979050 | 1167-Lng-A-T | 95   | chr1:47978950-47979050 |
| chr1 | 48279650 | 48279750 | 1188-Lng-A-T | 136  | chr1:48279650-48279750 |
| chr1 | 48572750 | 48572850 | 1090-Lng-A-T | 87   | chr1:48572750-48572850 |
| chr1 | 48920750 | 48920850 | 1065-Lng-B-T | 51   | chr1:48920750-48920850 |
| chr1 | 48994350 | 48994450 | 1090-Lng-A-T | 72   | chr1:48994350-48994450 |
| chr1 | 49169550 | 49169650 | 1072-Lng-A-T | 80   | chr1:49169550-49169650 |
| chr1 | 49182150 | 49182250 | 1065-Lng-A-T | 87   | chr1:49182150-49182250 |



**Table S2: SB Insertion regions**

|      |          |          |              |      |                        |
|------|----------|----------|--------------|------|------------------------|
| chr1 | 49240050 | 49240150 | 1223-Lng-B-T | 264  | chr1:49240050-49240150 |
| chr1 | 49299850 | 49299950 | 901-Lng-C-T  | 79   | chr1:49299850-49299950 |
| chr1 | 49336550 | 49336650 | 1065-Lng-B-T | 50   | chr1:49336550-49336650 |
| chr1 | 49631850 | 49631950 | 1152-Lng-A-T | 61   | chr1:49631850-49631950 |
| chr1 | 49797350 | 49797450 | 1167-Lng-A-T | 55   | chr1:49797350-49797450 |
| chr1 | 49802650 | 49802750 | 1065-Lng-A-T | 84   | chr1:49802650-49802750 |
| chr1 | 49905150 | 49905250 | 901-Lng-B-T  | 183  | chr1:49905150-49905250 |
| chr1 | 49928750 | 49928850 | 1065-Lng-A-T | 46   | chr1:49928750-49928850 |
| chr1 | 50018450 | 50018550 | 901-Lng-B-T  | 60   | chr1:50018450-50018550 |
| chr1 | 50089850 | 50089950 | 1065-Lng-A-T | 59   | chr1:50089850-50089950 |
| chr1 | 50580050 | 50580150 | 1090-Lng-A-T | 95   | chr1:50580050-50580150 |
| chr1 | 50636650 | 50636750 | 901-Lng-B-T  | 54   | chr1:50636650-50636750 |
| chr1 | 50942050 | 50942150 | 1065-Lng-A-T | 41   | chr1:50942050-50942150 |
| chr1 | 51063850 | 51063950 | 1065-Lng-A-T | 319  | chr1:51063850-51063950 |
| chr1 | 51094950 | 51095050 | 1004-Lng-A-T | 60   | chr1:51094950-51095050 |
| chr1 | 51359150 | 51359250 | 1065-Lng-B-T | 57   | chr1:51359150-51359250 |
| chr1 | 51423550 | 51423650 | 1223-Lng-B-T | 42   | chr1:51423550-51423650 |
| chr1 | 51893650 | 51893750 | 1065-Lng-A-T | 47   | chr1:51893650-51893750 |
| chr1 | 51895750 | 51895850 | 1065-Lng-A-T | 51   | chr1:51895750-51895850 |
| chr1 | 51903950 | 51904050 | 1151-Lng-A-T | 63   | chr1:51903950-51904050 |
| chr1 | 51959650 | 51959750 | 1274-Lng-A-T | 1019 | chr1:51959650-51959750 |
| chr1 | 51962650 | 51962750 | 1100-Lng-A-T | 62   | chr1:51962650-51962750 |
| chr1 | 52225150 | 52225250 | 1065-Lng-A-T | 56   | chr1:52225150-52225250 |
| chr1 | 52266750 | 52266850 | 1152-Lng-A-T | 580  | chr1:52266750-52266850 |
| chr1 | 52297950 | 52298050 | 1065-Lng-B-T | 45   | chr1:52297950-52298050 |
| chr1 | 52308850 | 52308950 | 901-Lng-C-T  | 85   | chr1:52308850-52308950 |
| chr1 | 52337650 | 52337750 | 1065-Lng-A-T | 87   | chr1:52337650-52337750 |
| chr1 | 52514650 | 52514750 | 901-Lng-C-T  | 76   | chr1:52514650-52514750 |
| chr1 | 52553450 | 52553550 | 1167-Lng-A-T | 93   | chr1:52553450-52553550 |
| chr1 | 52555950 | 52556050 | 901-Lng-C-T  | 186  | chr1:52555950-52556050 |
| chr1 | 52733850 | 52733950 | 1223-Lng-D-T | 46   | chr1:52733850-52733950 |
| chr1 | 52743250 | 52743350 | 1274-Lng-A-T | 62   | chr1:52743250-52743350 |
| chr1 | 52750450 | 52750550 | 1152-Lng-A-T | 71   | chr1:52750450-52750550 |
| chr1 | 52774450 | 52774550 | 1065-Lng-C-T | 81   | chr1:52774450-52774550 |
| chr1 | 52779750 | 52779850 | 846-Lng-A-T  | 121  | chr1:52779750-52779850 |
| chr1 | 52887350 | 52887450 | 1152-Lng-A-T | 31   | chr1:52887350-52887450 |
| chr1 | 52920150 | 52920250 | 1223-Lng-B-T | 46   | chr1:52920150-52920250 |
| chr1 | 52963850 | 52963950 | 846-Lng-A-T  | 198  | chr1:52963850-52963950 |
| chr1 | 53525150 | 53525250 | 1274-Lng-A-T | 190  | chr1:53525150-53525250 |
| chr1 | 53567550 | 53567650 | 901-Lng-B-T  | 47   | chr1:53567550-53567650 |
| chr1 | 53836450 | 53836550 | 901-Lng-B-T  | 109  | chr1:53836450-53836550 |
| chr1 | 53944350 | 53944450 | 1072-Lng-A-T | 53   | chr1:53944350-53944450 |
| chr1 | 54118750 | 54118850 | 1004-Lng-A-T | 54   | chr1:54118750-54118850 |
| chr1 | 54164150 | 54164250 | 1223-Lng-D-T | 46   | chr1:54164150-54164250 |
| chr1 | 54269650 | 54269750 | 1167-Lng-A-T | 101  | chr1:54269650-54269750 |
| chr1 | 54452250 | 54452350 | 1188-Lng-A-T | 118  | chr1:54452250-54452350 |

**Table S2: SB Insertion regions**

|      |          |          |              |      |                        |
|------|----------|----------|--------------|------|------------------------|
| chr1 | 54788650 | 54788750 | 1065-Lng-B-T | 87   | chr1:54788650-54788750 |
| chr1 | 54804450 | 54804550 | 1152-Lng-A-T | 63   | chr1:54804450-54804550 |
| chr1 | 54824250 | 54824350 | 1004-Lng-A-T | 628  | chr1:54824250-54824350 |
| chr1 | 54862550 | 54862650 | 1274-Lng-A-T | 196  | chr1:54862550-54862650 |
| chr1 | 54899150 | 54899250 | 1223-Lng-A-T | 56   | chr1:54899150-54899250 |
| chr1 | 54925250 | 54925350 | 1065-Lng-B-T | 485  | chr1:54925250-54925350 |
| chr1 | 54938150 | 54938250 | 1274-Lng-A-T | 50   | chr1:54938150-54938250 |
| chr1 | 55012750 | 55012850 | 901-Lng-A-T  | 313  | chr1:55012750-55012850 |
| chr1 | 55067250 | 55067350 | 1223-Lng-A-T | 220  | chr1:55067250-55067350 |
| chr1 | 55167350 | 55167450 | 846-Lng-A-T  | 831  | chr1:55167350-55167450 |
| chr1 | 55319750 | 55319850 | 1065-Lng-A-T | 107  | chr1:55319750-55319850 |
| chr1 | 55455350 | 55455450 | 1152-Lng-A-T | 37   | chr1:55455350-55455450 |
| chr1 | 55898350 | 55898450 | 1188-Lng-A-T | 194  | chr1:55898350-55898450 |
| chr1 | 55991350 | 55991450 | 1223-Lng-D-T | 59   | chr1:55991350-55991450 |
| chr1 | 56001950 | 56002050 | 846-Lng-A-T  | 63   | chr1:56001950-56002050 |
| chr1 | 56017650 | 56017750 | 846-Lng-A-T  | 51   | chr1:56017650-56017750 |
| chr1 | 56315050 | 56315150 | 1090-Lng-A-T | 61   | chr1:56315050-56315150 |
| chr1 | 56491750 | 56491850 | 1152-Lng-A-T | 143  | chr1:56491750-56491850 |
| chr1 | 56562950 | 56563050 | 1152-Lng-A-T | 43   | chr1:56562950-56563050 |
| chr1 | 56650450 | 56650550 | 1004-Lng-A-T | 662  | chr1:56650450-56650550 |
| chr1 | 57106550 | 57106650 | 846-Lng-A-T  | 92   | chr1:57106550-57106650 |
| chr1 | 57332350 | 57332450 | 1167-Lng-A-T | 51   | chr1:57332350-57332450 |
| chr1 | 57360850 | 57360950 | 901-Lng-A-T  | 148  | chr1:57360850-57360950 |
| chr1 | 57360950 | 57361050 | 1065-Lng-A-T | 218  | chr1:57360950-57361050 |
| chr1 | 57374750 | 57374850 | 901-Lng-B-T  | 97   | chr1:57374750-57374850 |
| chr1 | 58055350 | 58055450 | 1223-Lng-D-T | 46   | chr1:58055350-58055450 |
| chr1 | 58081950 | 58082050 | 1188-Lng-A-T | 47   | chr1:58081950-58082050 |
| chr1 | 58101450 | 58101550 | 1072-Lng-A-T | 48   | chr1:58101450-58101550 |
| chr1 | 58113250 | 58113350 | 1274-Lng-A-T | 95   | chr1:58113250-58113350 |
| chr1 | 58143550 | 58143650 | 1188-Lng-A-T | 62   | chr1:58143550-58143650 |
| chr1 | 58165950 | 58166050 | 1090-Lng-A-T | 1294 | chr1:58165950-58166050 |
| chr1 | 58204850 | 58204950 | 901-Lng-B-T  | 225  | chr1:58204850-58204950 |
| chr1 | 58400650 | 58400750 | 1100-Lng-B-T | 144  | chr1:58400650-58400750 |
| chr1 | 58504350 | 58504450 | 846-Lng-A-T  | 145  | chr1:58504350-58504450 |
| chr1 | 58544250 | 58544350 | 1223-Lng-B-T | 160  | chr1:58544250-58544350 |
| chr1 | 58598650 | 58598750 | 901-Lng-A-T  | 227  | chr1:58598650-58598750 |
| chr1 | 58916750 | 58916850 | 1004-Lng-A-T | 65   | chr1:58916750-58916850 |
| chr1 | 58986850 | 58986950 | 1223-Lng-B-T | 58   | chr1:58986850-58986950 |
| chr1 | 59016450 | 59016550 | 1167-Lng-A-T | 151  | chr1:59016450-59016550 |
| chr1 | 59020750 | 59020850 | 1223-Lng-A-T | 67   | chr1:59020750-59020850 |
| chr1 | 59288650 | 59288750 | 1100-Lng-A-T | 63   | chr1:59288650-59288750 |
| chr1 | 59611950 | 59612050 | 1274-Lng-A-T | 81   | chr1:59611950-59612050 |
| chr1 | 59695450 | 59695550 | 1065-Lng-A-T | 41   | chr1:59695450-59695550 |
| chr1 | 59699750 | 59699850 | 1072-Lng-A-T | 93   | chr1:59699750-59699850 |
| chr1 | 59702850 | 59702950 | 1223-Lng-B-T | 52   | chr1:59702850-59702950 |
| chr1 | 59740250 | 59740350 | 1090-Lng-A-T | 113  | chr1:59740250-59740350 |

**Table S2: SB Insertion regions**

|      |          |          |              |      |                        |
|------|----------|----------|--------------|------|------------------------|
| chr1 | 59776750 | 59776850 | 1223-Lng-B-T | 78   | chr1:59776750-59776850 |
| chr1 | 59795750 | 59795850 | 846-Lng-A-T  | 1296 | chr1:59795750-59795850 |
| chr1 | 59840550 | 59840650 | 901-Lng-A-T  | 90   | chr1:59840550-59840650 |
| chr1 | 59861250 | 59861350 | 1274-Lng-A-T | 133  | chr1:59861250-59861350 |
| chr1 | 59865150 | 59865250 | 901-Lng-C-T  | 45   | chr1:59865150-59865250 |
| chr1 | 59907650 | 59907750 | 1100-Lng-A-T | 129  | chr1:59907650-59907750 |
| chr1 | 59937650 | 59937750 | 1223-Lng-C-T | 43   | chr1:59937650-59937750 |
| chr1 | 59968350 | 59968450 | 1072-Lng-A-T | 128  | chr1:59968350-59968450 |
| chr1 | 59974250 | 59974350 | 1223-Lng-D-T | 54   | chr1:59974250-59974350 |
| chr1 | 59992250 | 59992350 | 1152-Lng-A-T | 33   | chr1:59992250-59992350 |
| chr1 | 59997050 | 59997150 | 1090-Lng-A-T | 75   | chr1:59997050-59997150 |
| chr1 | 60017650 | 60017750 | 1100-Lng-A-T | 80   | chr1:60017650-60017750 |
| chr1 | 60024350 | 60024450 | 1188-Lng-A-T | 320  | chr1:60024350-60024450 |
| chr1 | 60057750 | 60057850 | 1274-Lng-A-T | 226  | chr1:60057750-60057850 |
| chr1 | 60070450 | 60070550 | 1065-Lng-B-T | 87   | chr1:60070450-60070550 |
| chr1 | 60110750 | 60110850 | 1090-Lng-A-T | 64   | chr1:60110750-60110850 |
| chr1 | 60215150 | 60215250 | 1223-Lng-A-T | 971  | chr1:60215150-60215250 |
| chr1 | 60350750 | 60350850 | 1274-Lng-A-T | 67   | chr1:60350750-60350850 |
| chr1 | 60369650 | 60369750 | 1152-Lng-A-T | 133  | chr1:60369650-60369750 |
| chr1 | 60386050 | 60386150 | 1100-Lng-A-T | 82   | chr1:60386050-60386150 |
| chr1 | 60392550 | 60392650 | 1223-Lng-C-T | 133  | chr1:60392550-60392650 |
| chr1 | 60448750 | 60448850 | 1167-Lng-A-T | 82   | chr1:60448750-60448850 |
| chr1 | 60553350 | 60553450 | 1072-Lng-A-T | 108  | chr1:60553350-60553450 |
| chr1 | 60559850 | 60559950 | 1274-Lng-A-T | 58   | chr1:60559850-60559950 |
| chr1 | 60581150 | 60581250 | 901-Lng-D-T  | 529  | chr1:60581150-60581250 |
| chr1 | 60598350 | 60598450 | 1100-Lng-A-T | 105  | chr1:60598350-60598450 |
| chr1 | 60793350 | 60793450 | 1274-Lng-A-T | 69   | chr1:60793350-60793450 |
| chr1 | 60910750 | 60910850 | 1072-Lng-A-T | 122  | chr1:60910750-60910850 |
| chr1 | 61393850 | 61393950 | 1090-Lng-B-T | 320  | chr1:61393850-61393950 |
| chr1 | 61427150 | 61427250 | 1004-Lng-A-T | 135  | chr1:61427150-61427250 |
| chr1 | 61453450 | 61453550 | 1223-Lng-A-T | 66   | chr1:61453450-61453550 |
| chr1 | 61689750 | 61689850 | 1100-Lng-A-T | 118  | chr1:61689750-61689850 |
| chr1 | 61712950 | 61713050 | 1090-Lng-B-T | 123  | chr1:61712950-61713050 |
| chr1 | 61838550 | 61838650 | 1223-Lng-A-T | 87   | chr1:61838550-61838650 |
| chr1 | 61838650 | 61838750 | 1004-Lng-A-T | 68   | chr1:61838650-61838750 |
| chr1 | 61916250 | 61916350 | 1223-Lng-B-T | 154  | chr1:61916250-61916350 |
| chr1 | 61936750 | 61936850 | 1065-Lng-A-T | 66   | chr1:61936750-61936850 |
| chr1 | 61969950 | 61970050 | 1152-Lng-A-T | 108  | chr1:61969950-61970050 |
| chr1 | 61973950 | 61974050 | 1100-Lng-A-T | 164  | chr1:61973950-61974050 |
| chr1 | 62076250 | 62076350 | 901-Lng-A-T  | 81   | chr1:62076250-62076350 |
| chr1 | 62243750 | 62243850 | 901-Lng-C-T  | 98   | chr1:62243750-62243850 |
| chr1 | 62288150 | 62288250 | 1065-Lng-C-T | 992  | chr1:62288150-62288250 |
| chr1 | 62328550 | 62328650 | 901-Lng-A-T  | 86   | chr1:62328550-62328650 |
| chr1 | 63033350 | 63033450 | 1100-Lng-A-T | 810  | chr1:63033350-63033450 |
| chr1 | 63097050 | 63097150 | 1004-Lng-A-T | 473  | chr1:63097050-63097150 |
| chr1 | 63127550 | 63127650 | 1223-Lng-A-T | 190  | chr1:63127550-63127650 |

**Table S2: SB Insertion regions**

|      |          |          |              |      |                        |
|------|----------|----------|--------------|------|------------------------|
| chr1 | 63128050 | 63128150 | 1100-Lng-B-T | 59   | chr1:63128050-63128150 |
| chr1 | 63146350 | 63146450 | 1065-Lng-A-T | 58   | chr1:63146350-63146450 |
| chr1 | 63148650 | 63148750 | 1274-Lng-A-T | 71   | chr1:63148650-63148750 |
| chr1 | 63342250 | 63342350 | 1223-Lng-C-T | 43   | chr1:63342250-63342350 |
| chr1 | 63375050 | 63375150 | 1223-Lng-A-T | 170  | chr1:63375050-63375150 |
| chr1 | 63550450 | 63550550 | 1223-Lng-A-T | 1313 | chr1:63550450-63550550 |
| chr1 | 64022650 | 64022750 | 901-Lng-A-T  | 65   | chr1:64022650-64022750 |
| chr1 | 64090750 | 64090850 | 901-Lng-C-T  | 55   | chr1:64090750-64090850 |
| chr1 | 64151350 | 64151450 | 1065-Lng-A-T | 66   | chr1:64151350-64151450 |
| chr1 | 64179750 | 64179850 | 1065-Lng-B-T | 48   | chr1:64179750-64179850 |
| chr1 | 64352750 | 64352850 | 1223-Lng-B-T | 39   | chr1:64352750-64352850 |
| chr1 | 64544450 | 64544550 | 1072-Lng-A-T | 95   | chr1:64544450-64544550 |
| chr1 | 64564150 | 64564250 | 1274-Lng-A-T | 80   | chr1:64564150-64564250 |
| chr1 | 64595550 | 64595650 | 846-Lng-A-T  | 86   | chr1:64595550-64595650 |
| chr1 | 64597550 | 64597650 | 901-Lng-C-T  | 40   | chr1:64597550-64597650 |
| chr1 | 64616650 | 64616750 | 1090-Lng-A-T | 202  | chr1:64616650-64616750 |
| chr1 | 64717950 | 64718050 | 1004-Lng-A-T | 88   | chr1:64717950-64718050 |
| chr1 | 64731150 | 64731250 | 1065-Lng-A-T | 35   | chr1:64731150-64731250 |
| chr1 | 64893450 | 64893550 | 1167-Lng-A-T | 69   | chr1:64893450-64893550 |
| chr1 | 64894050 | 64894150 | 1167-Lng-A-T | 807  | chr1:64894050-64894150 |
| chr1 | 64900850 | 64900950 | 1004-Lng-A-T | 114  | chr1:64900850-64900950 |
| chr1 | 64965150 | 64965250 | 1223-Lng-A-T | 134  | chr1:64965150-64965250 |
| chr1 | 64986250 | 64986350 | 901-Lng-C-T  | 29   | chr1:64986250-64986350 |
| chr1 | 65204850 | 65204950 | 1188-Lng-A-T | 761  | chr1:65204850-65204950 |
| chr1 | 65204850 | 65204950 | 1223-Lng-B-T | 37   | chr1:65204850-65204950 |
| chr1 | 65250550 | 65250650 | 1065-Lng-B-T | 53   | chr1:65250550-65250650 |
| chr1 | 65284050 | 65284150 | 1065-Lng-A-T | 64   | chr1:65284050-65284150 |
| chr1 | 65447850 | 65447950 | 1223-Lng-A-T | 121  | chr1:65447850-65447950 |
| chr1 | 65465850 | 65465950 | 901-Lng-A-T  | 83   | chr1:65465850-65465950 |
| chr1 | 65944350 | 65944450 | 1167-Lng-A-T | 61   | chr1:65944350-65944450 |
| chr1 | 66057250 | 66057350 | 1188-Lng-A-T | 204  | chr1:66057250-66057350 |
| chr1 | 66192150 | 66192250 | 1100-Lng-B-T | 61   | chr1:66192150-66192250 |
| chr1 | 66205950 | 66206050 | 1188-Lng-A-T | 39   | chr1:66205950-66206050 |
| chr1 | 66588850 | 66588950 | 1065-Lng-C-T | 85   | chr1:66588850-66588950 |
| chr1 | 66775950 | 66776050 | 1188-Lng-A-T | 1709 | chr1:66775950-66776050 |
| chr1 | 66777550 | 66777650 | 1188-Lng-A-T | 96   | chr1:66777550-66777650 |
| chr1 | 66777750 | 66777850 | 846-Lng-A-T  | 94   | chr1:66777750-66777850 |
| chr1 | 66780750 | 66780850 | 1188-Lng-A-T | 50   | chr1:66780750-66780850 |
| chr1 | 66850850 | 66850950 | 1188-Lng-A-T | 164  | chr1:66850850-66850950 |
| chr1 | 66851250 | 66851350 | 1274-Lng-A-T | 149  | chr1:66851250-66851350 |
| chr1 | 66856850 | 66856950 | 901-Lng-A-T  | 101  | chr1:66856850-66856950 |
| chr1 | 66907550 | 66907650 | 1167-Lng-A-T | 45   | chr1:66907550-66907650 |
| chr1 | 67022050 | 67022150 | 1072-Lng-A-T | 58   | chr1:67022050-67022150 |
| chr1 | 67042550 | 67042650 | 1090-Lng-A-T | 64   | chr1:67042550-67042650 |
| chr1 | 67064150 | 67064250 | 846-Lng-A-T  | 388  | chr1:67064150-67064250 |
| chr1 | 67078850 | 67078950 | 846-Lng-A-T  | 82   | chr1:67078850-67078950 |

**Table S2: SB Insertion regions**

|      |          |          |              |     |                        |
|------|----------|----------|--------------|-----|------------------------|
| chr1 | 67100650 | 67100750 | 1223-Lng-C-T | 48  | chr1:67100650-67100750 |
| chr1 | 67363050 | 67363150 | 901-Lng-B-T  | 114 | chr1:67363050-67363150 |
| chr1 | 67386650 | 67386750 | 1223-Lng-C-T | 46  | chr1:67386650-67386750 |
| chr1 | 67438450 | 67438550 | 901-Lng-C-T  | 185 | chr1:67438450-67438550 |
| chr1 | 67438650 | 67438750 | 901-Lng-C-T  | 42  | chr1:67438650-67438750 |
| chr1 | 67509050 | 67509150 | 1065-Lng-B-T | 76  | chr1:67509050-67509150 |
| chr1 | 67528150 | 67528250 | 901-Lng-A-T  | 137 | chr1:67528150-67528250 |
| chr1 | 67906650 | 67906750 | 901-Lng-A-T  | 59  | chr1:67906650-67906750 |
| chr1 | 67910950 | 67911050 | 901-Lng-B-T  | 238 | chr1:67910950-67911050 |
| chr1 | 68179050 | 68179150 | 1152-Lng-A-T | 58  | chr1:68179050-68179150 |
| chr1 | 68535750 | 68535850 | 1072-Lng-A-T | 174 | chr1:68535750-68535850 |
| chr1 | 68626150 | 68626250 | 1223-Lng-A-T | 214 | chr1:68626150-68626250 |
| chr1 | 68703350 | 68703450 | 901-Lng-A-T  | 109 | chr1:68703350-68703450 |
| chr1 | 68836850 | 68836950 | 1065-Lng-A-T | 45  | chr1:68836850-68836950 |
| chr1 | 68888050 | 68888150 | 1274-Lng-A-T | 54  | chr1:68888050-68888150 |
| chr1 | 68963550 | 68963650 | 1167-Lng-A-T | 69  | chr1:68963550-68963650 |
| chr1 | 69080750 | 69080850 | 901-Lng-A-T  | 136 | chr1:69080750-69080850 |
| chr1 | 69187750 | 69187850 | 1188-Lng-A-T | 49  | chr1:69187750-69187850 |
| chr1 | 69338050 | 69338150 | 1100-Lng-A-T | 61  | chr1:69338050-69338150 |
| chr1 | 69623350 | 69623450 | 1065-Lng-B-T | 43  | chr1:69623350-69623450 |
| chr1 | 69637850 | 69637950 | 1167-Lng-A-T | 121 | chr1:69637850-69637950 |
| chr1 | 69690950 | 69691050 | 1090-Lng-A-T | 103 | chr1:69690950-69691050 |
| chr1 | 69930150 | 69930250 | 901-Lng-B-T  | 181 | chr1:69930150-69930250 |
| chr1 | 70244750 | 70244850 | 1100-Lng-A-T | 100 | chr1:70244750-70244850 |
| chr1 | 70390150 | 70390250 | 1223-Lng-B-T | 204 | chr1:70390150-70390250 |
| chr1 | 70565650 | 70565750 | 1223-Lng-A-T | 160 | chr1:70565650-70565750 |
| chr1 | 70710050 | 70710150 | 1065-Lng-B-T | 63  | chr1:70710050-70710150 |
| chr1 | 70756350 | 70756450 | 1065-Lng-B-T | 56  | chr1:70756350-70756450 |
| chr1 | 70778350 | 70778450 | 1152-Lng-A-T | 109 | chr1:70778350-70778450 |
| chr1 | 70792650 | 70792750 | 1065-Lng-A-T | 65  | chr1:70792650-70792750 |
| chr1 | 70860550 | 70860650 | 1223-Lng-A-T | 166 | chr1:70860550-70860650 |
| chr1 | 70976850 | 70976950 | 1223-Lng-A-T | 54  | chr1:70976850-70976950 |
| chr1 | 71087150 | 71087250 | 901-Lng-B-T  | 329 | chr1:71087150-71087250 |
| chr1 | 71304150 | 71304250 | 1274-Lng-A-T | 110 | chr1:71304150-71304250 |
| chr1 | 71331250 | 71331350 | 1152-Lng-A-T | 69  | chr1:71331250-71331350 |
| chr1 | 71440450 | 71440550 | 1188-Lng-A-T | 48  | chr1:71440450-71440550 |
| chr1 | 71636050 | 71636150 | 846-Lng-A-T  | 76  | chr1:71636050-71636150 |
| chr1 | 72239450 | 72239550 | 901-Lng-B-T  | 95  | chr1:72239450-72239550 |
| chr1 | 72394850 | 72394950 | 901-Lng-B-T  | 120 | chr1:72394850-72394950 |
| chr1 | 72461350 | 72461450 | 1188-Lng-A-T | 35  | chr1:72461350-72461450 |
| chr1 | 72518750 | 72518850 | 901-Lng-A-T  | 422 | chr1:72518750-72518850 |
| chr1 | 72552850 | 72552950 | 1151-Lng-A-T | 443 | chr1:72552850-72552950 |
| chr1 | 72630450 | 72630550 | 1100-Lng-A-T | 67  | chr1:72630450-72630550 |
| chr1 | 72814450 | 72814550 | 1090-Lng-B-T | 538 | chr1:72814450-72814550 |
| chr1 | 73009450 | 73009550 | 901-Lng-C-T  | 53  | chr1:73009450-73009550 |
| chr1 | 73039150 | 73039250 | 1100-Lng-A-T | 98  | chr1:73039150-73039250 |

**Table S2: SB Insertion regions**

|      |          |          |              |      |                        |
|------|----------|----------|--------------|------|------------------------|
| chr1 | 73099950 | 73100050 | 1072-Lng-A-T | 175  | chr1:73099950-73100050 |
| chr1 | 73191750 | 73191850 | 1223-Lng-A-T | 120  | chr1:73191750-73191850 |
| chr1 | 73221650 | 73221750 | 1100-Lng-A-T | 76   | chr1:73221650-73221750 |
| chr1 | 73251550 | 73251650 | 901-Lng-A-T  | 263  | chr1:73251550-73251650 |
| chr1 | 73273250 | 73273350 | 1004-Lng-A-T | 53   | chr1:73273250-73273350 |
| chr1 | 73297150 | 73297250 | 1004-Lng-A-T | 100  | chr1:73297150-73297250 |
| chr1 | 73297250 | 73297350 | 1004-Lng-A-T | 176  | chr1:73297250-73297350 |
| chr1 | 74045250 | 74045350 | 1152-Lng-A-T | 56   | chr1:74045250-74045350 |
| chr1 | 74155650 | 74155750 | 1065-Lng-C-T | 68   | chr1:74155650-74155750 |
| chr1 | 74192850 | 74192950 | 1151-Lng-A-T | 66   | chr1:74192850-74192950 |
| chr1 | 74507550 | 74507650 | 1223-Lng-C-T | 43   | chr1:74507550-74507650 |
| chr1 | 74509050 | 74509150 | 1167-Lng-A-T | 61   | chr1:74509050-74509150 |
| chr1 | 74557550 | 74557650 | 1223-Lng-A-T | 61   | chr1:74557550-74557650 |
| chr1 | 74580450 | 74580550 | 901-Lng-A-T  | 54   | chr1:74580450-74580550 |
| chr1 | 74633450 | 74633550 | 1100-Lng-A-T | 343  | chr1:74633450-74633550 |
| chr1 | 74644850 | 74644950 | 1100-Lng-A-T | 90   | chr1:74644850-74644950 |
| chr1 | 75122550 | 75122650 | 1152-Lng-A-T | 64   | chr1:75122550-75122650 |
| chr1 | 75186150 | 75186250 | 1151-Lng-A-T | 1470 | chr1:75186150-75186250 |
| chr1 | 75214250 | 75214350 | 1152-Lng-A-T | 65   | chr1:75214250-75214350 |
| chr1 | 75467550 | 75467650 | 1223-Lng-B-T | 35   | chr1:75467550-75467650 |
| chr1 | 75550550 | 75550650 | 1065-Lng-C-T | 386  | chr1:75550550-75550650 |
| chr1 | 75656550 | 75656650 | 1065-Lng-A-T | 43   | chr1:75656550-75656650 |
| chr1 | 75880350 | 75880450 | 901-Lng-C-T  | 92   | chr1:75880350-75880450 |
| chr1 | 76063150 | 76063250 | 1167-Lng-A-T | 124  | chr1:76063150-76063250 |
| chr1 | 76157350 | 76157450 | 901-Lng-A-T  | 59   | chr1:76157350-76157450 |
| chr1 | 77078250 | 77078350 | 1004-Lng-A-T | 273  | chr1:77078250-77078350 |
| chr1 | 77425150 | 77425250 | 1274-Lng-A-T | 55   | chr1:77425150-77425250 |
| chr1 | 77482450 | 77482550 | 1152-Lng-A-T | 67   | chr1:77482450-77482550 |
| chr1 | 77528350 | 77528450 | 1223-Lng-C-T | 48   | chr1:77528350-77528450 |
| chr1 | 77892750 | 77892850 | 1223-Lng-B-T | 34   | chr1:77892750-77892850 |
| chr1 | 78148550 | 78148650 | 1223-Lng-A-T | 176  | chr1:78148550-78148650 |
| chr1 | 78297050 | 78297150 | 901-Lng-C-T  | 55   | chr1:78297050-78297150 |
| chr1 | 78307950 | 78308050 | 1188-Lng-A-T | 209  | chr1:78307950-78308050 |
| chr1 | 78430550 | 78430650 | 1274-Lng-A-T | 331  | chr1:78430550-78430650 |
| chr1 | 78466150 | 78466250 | 1223-Lng-A-T | 61   | chr1:78466150-78466250 |
| chr1 | 78602150 | 78602250 | 1223-Lng-A-T | 110  | chr1:78602150-78602250 |
| chr1 | 79015150 | 79015250 | 1065-Lng-B-T | 58   | chr1:79015150-79015250 |
| chr1 | 79090550 | 79090650 | 1152-Lng-A-T | 88   | chr1:79090550-79090650 |
| chr1 | 79223350 | 79223450 | 1065-Lng-B-T | 87   | chr1:79223350-79223450 |
| chr1 | 79694450 | 79694550 | 1188-Lng-A-T | 43   | chr1:79694450-79694550 |
| chr1 | 79702950 | 79703050 | 1188-Lng-A-T | 38   | chr1:79702950-79703050 |
| chr1 | 79773650 | 79773750 | 1223-Lng-B-T | 217  | chr1:79773650-79773750 |
| chr1 | 79789250 | 79789350 | 1167-Lng-A-T | 50   | chr1:79789250-79789350 |
| chr1 | 79814250 | 79814350 | 901-Lng-A-T  | 103  | chr1:79814250-79814350 |
| chr1 | 79833150 | 79833250 | 1072-Lng-A-T | 55   | chr1:79833150-79833250 |
| chr1 | 80188950 | 80189050 | 901-Lng-B-T  | 93   | chr1:80188950-80189050 |

**Table S2: SB Insertion regions**

|      |          |          |              |     |                        |
|------|----------|----------|--------------|-----|------------------------|
| chr1 | 80260950 | 80261050 | 1223-Lng-B-T | 34  | chr1:80260950-80261050 |
| chr1 | 80266250 | 80266350 | 901-Lng-A-T  | 119 | chr1:80266250-80266350 |
| chr1 | 80281950 | 80282050 | 901-Lng-D-T  | 496 | chr1:80281950-80282050 |
| chr1 | 80283450 | 80283550 | 1004-Lng-A-T | 103 | chr1:80283450-80283550 |
| chr1 | 80302650 | 80302750 | 1188-Lng-A-T | 49  | chr1:80302650-80302750 |
| chr1 | 80308450 | 80308550 | 901-Lng-A-T  | 567 | chr1:80308450-80308550 |
| chr1 | 80309250 | 80309350 | 1188-Lng-A-T | 79  | chr1:80309250-80309350 |
| chr1 | 80314550 | 80314650 | 1167-Lng-A-T | 93  | chr1:80314550-80314650 |
| chr1 | 80317150 | 80317250 | 1223-Lng-C-T | 46  | chr1:80317150-80317250 |
| chr1 | 80318950 | 80319050 | 1151-Lng-A-T | 124 | chr1:80318950-80319050 |
| chr1 | 80325850 | 80325950 | 1151-Lng-A-T | 212 | chr1:80325850-80325950 |
| chr1 | 80328750 | 80328850 | 901-Lng-A-T  | 389 | chr1:80328750-80328850 |
| chr1 | 80492050 | 80492150 | 1100-Lng-A-T | 63  | chr1:80492050-80492150 |
| chr1 | 80600750 | 80600850 | 1223-Lng-B-T | 514 | chr1:80600750-80600850 |
| chr1 | 80671850 | 80671950 | 1065-Lng-B-T | 97  | chr1:80671850-80671950 |
| chr1 | 80744050 | 80744150 | 1223-Lng-B-T | 164 | chr1:80744050-80744150 |
| chr1 | 81129450 | 81129550 | 1100-Lng-A-T | 64  | chr1:81129450-81129550 |
| chr1 | 81135750 | 81135850 | 1274-Lng-A-T | 517 | chr1:81135750-81135850 |
| chr1 | 81150150 | 81150250 | 1072-Lng-A-T | 152 | chr1:81150150-81150250 |
| chr1 | 81206750 | 81206850 | 901-Lng-C-T  | 28  | chr1:81206750-81206850 |
| chr1 | 81481250 | 81481350 | 1274-Lng-A-T | 117 | chr1:81481250-81481350 |
| chr1 | 81528350 | 81528450 | 901-Lng-B-T  | 54  | chr1:81528350-81528450 |
| chr1 | 81528350 | 81528450 | 1152-Lng-A-T | 43  | chr1:81528350-81528450 |
| chr1 | 81528350 | 81528450 | 1188-Lng-A-T | 38  | chr1:81528350-81528450 |
| chr1 | 81528350 | 81528450 | 1223-Lng-B-T | 81  | chr1:81528350-81528450 |
| chr1 | 81528350 | 81528450 | 901-Lng-A-T  | 87  | chr1:81528350-81528450 |
| chr1 | 81570050 | 81570150 | 1072-Lng-A-T | 51  | chr1:81570050-81570150 |
| chr1 | 81836050 | 81836150 | 901-Lng-B-T  | 61  | chr1:81836050-81836150 |
| chr1 | 82013250 | 82013350 | 901-Lng-C-T  | 67  | chr1:82013250-82013350 |
| chr1 | 82240550 | 82240650 | 1065-Lng-A-T | 34  | chr1:82240550-82240650 |
| chr1 | 82263150 | 82263250 | 901-Lng-A-T  | 158 | chr1:82263150-82263250 |
| chr1 | 82515650 | 82515750 | 901-Lng-A-T  | 70  | chr1:82515650-82515750 |
| chr1 | 82579550 | 82579650 | 1223-Lng-B-T | 135 | chr1:82579550-82579650 |
| chr1 | 82588650 | 82588750 | 901-Lng-D-T  | 480 | chr1:82588650-82588750 |
| chr1 | 82592250 | 82592350 | 1100-Lng-A-T | 126 | chr1:82592250-82592350 |
| chr1 | 82605450 | 82605550 | 1151-Lng-A-T | 65  | chr1:82605450-82605550 |
| chr1 | 82664150 | 82664250 | 1090-Lng-A-T | 47  | chr1:82664150-82664250 |
| chr1 | 82698150 | 82698250 | 846-Lng-A-T  | 86  | chr1:82698150-82698250 |
| chr1 | 82707150 | 82707250 | 901-Lng-C-T  | 119 | chr1:82707150-82707250 |
| chr1 | 82839750 | 82839850 | 1188-Lng-A-T | 232 | chr1:82839750-82839850 |
| chr1 | 82850150 | 82850250 | 1274-Lng-A-T | 230 | chr1:82850150-82850250 |
| chr1 | 82926850 | 82926950 | 1090-Lng-A-T | 82  | chr1:82926850-82926950 |
| chr1 | 82946550 | 82946650 | 1004-Lng-A-T | 81  | chr1:82946550-82946650 |
| chr1 | 83269850 | 83269950 | 1090-Lng-A-T | 85  | chr1:83269850-83269950 |
| chr1 | 83567050 | 83567150 | 901-Lng-B-T  | 132 | chr1:83567050-83567150 |
| chr1 | 83625550 | 83625650 | 901-Lng-B-T  | 272 | chr1:83625550-83625650 |

**Table S2: SB Insertion regions**

|      |          |          |              |     |                        |
|------|----------|----------|--------------|-----|------------------------|
| chr1 | 83657950 | 83658050 | 1152-Lng-A-T | 51  | chr1:83657950-83658050 |
| chr1 | 83946950 | 83947050 | 1274-Lng-A-T | 96  | chr1:83946950-83947050 |
| chr1 | 84421750 | 84421850 | 1274-Lng-A-T | 81  | chr1:84421750-84421850 |
| chr1 | 84722050 | 84722150 | 1274-Lng-A-T | 56  | chr1:84722050-84722150 |
| chr1 | 84722050 | 84722150 | 1065-Lng-A-T | 558 | chr1:84722050-84722150 |
| chr1 | 84735750 | 84735850 | 1100-Lng-A-T | 128 | chr1:84735750-84735850 |
| chr1 | 84749150 | 84749250 | 1188-Lng-A-T | 80  | chr1:84749150-84749250 |
| chr1 | 84775550 | 84775650 | 901-Lng-B-T  | 80  | chr1:84775550-84775650 |
| chr1 | 84777950 | 84778050 | 901-Lng-D-T  | 103 | chr1:84777950-84778050 |
| chr1 | 84793650 | 84793750 | 1188-Lng-A-T | 35  | chr1:84793650-84793750 |
| chr1 | 84800550 | 84800650 | 1004-Lng-A-T | 72  | chr1:84800550-84800650 |
| chr1 | 84801350 | 84801450 | 1274-Lng-A-T | 140 | chr1:84801350-84801450 |
| chr1 | 85253550 | 85253650 | 1004-Lng-A-T | 480 | chr1:85253550-85253650 |
| chr1 | 85343550 | 85343650 | 1100-Lng-A-T | 82  | chr1:85343550-85343650 |
| chr1 | 87388850 | 87388950 | 1004-Lng-A-T | 71  | chr1:87388850-87388950 |
| chr1 | 87393050 | 87393150 | 1072-Lng-A-T | 118 | chr1:87393050-87393150 |
| chr1 | 87699450 | 87699550 | 1223-Lng-B-T | 40  | chr1:87699450-87699550 |
| chr1 | 87710650 | 87710750 | 1100-Lng-A-T | 72  | chr1:87710650-87710750 |
| chr1 | 87726450 | 87726550 | 1152-Lng-A-T | 261 | chr1:87726450-87726550 |
| chr1 | 87730450 | 87730550 | 1072-Lng-A-T | 197 | chr1:87730450-87730550 |
| chr1 | 87739950 | 87740050 | 1065-Lng-B-T | 60  | chr1:87739950-87740050 |
| chr1 | 87741250 | 87741350 | 1274-Lng-A-T | 107 | chr1:87741250-87741350 |
| chr1 | 87743850 | 87743950 | 1065-Lng-B-T | 43  | chr1:87743850-87743950 |
| chr1 | 88021050 | 88021150 | 901-Lng-C-T  | 271 | chr1:88021050-88021150 |
| chr1 | 88137450 | 88137550 | 1188-Lng-A-T | 110 | chr1:88137450-88137550 |
| chr1 | 88164550 | 88164650 | 1100-Lng-A-T | 141 | chr1:88164550-88164650 |
| chr1 | 88454750 | 88454850 | 1223-Lng-D-T | 48  | chr1:88454750-88454850 |
| chr1 | 88511450 | 88511550 | 1065-Lng-B-T | 64  | chr1:88511450-88511550 |
| chr1 | 88853350 | 88853450 | 1065-Lng-C-T | 86  | chr1:88853350-88853450 |
| chr1 | 88915150 | 88915250 | 1004-Lng-A-T | 51  | chr1:88915150-88915250 |
| chr1 | 89119950 | 89120050 | 901-Lng-A-T  | 547 | chr1:89119950-89120050 |
| chr1 | 89148950 | 89149050 | 1100-Lng-A-T | 145 | chr1:89148950-89149050 |
| chr1 | 89292050 | 89292150 | 1100-Lng-A-T | 83  | chr1:89292050-89292150 |
| chr1 | 89309550 | 89309650 | 1072-Lng-A-T | 189 | chr1:89309550-89309650 |
| chr1 | 89320550 | 89320650 | 1188-Lng-A-T | 39  | chr1:89320550-89320650 |
| chr1 | 89442850 | 89442950 | 1274-Lng-A-T | 193 | chr1:89442850-89442950 |
| chr1 | 89555850 | 89555950 | 1004-Lng-A-T | 61  | chr1:89555850-89555950 |
| chr1 | 89789350 | 89789450 | 1072-Lng-A-T | 53  | chr1:89789350-89789450 |
| chr1 | 89817450 | 89817550 | 1223-Lng-D-T | 49  | chr1:89817450-89817550 |
| chr1 | 89968350 | 89968450 | 1223-Lng-B-T | 468 | chr1:89968350-89968450 |
| chr1 | 90049550 | 90049650 | 1090-Lng-B-T | 226 | chr1:90049550-90049650 |
| chr1 | 90170850 | 90170950 | 1004-Lng-A-T | 114 | chr1:90170850-90170950 |
| chr1 | 91164050 | 91164150 | 1072-Lng-A-T | 171 | chr1:91164050-91164150 |
| chr1 | 91404550 | 91404650 | 901-Lng-B-T  | 142 | chr1:91404550-91404650 |
| chr1 | 91437250 | 91437350 | 1223-Lng-C-T | 100 | chr1:91437250-91437350 |
| chr1 | 91468750 | 91468850 | 1090-Lng-A-T | 62  | chr1:91468750-91468850 |



**Table S2: SB Insertion regions**

|      |          |          |              |     |                        |
|------|----------|----------|--------------|-----|------------------------|
| chr1 | 91483050 | 91483150 | 1065-Lng-A-T | 84  | chr1:91483050-91483150 |
| chr1 | 91490250 | 91490350 | 1223-Lng-D-T | 52  | chr1:91490250-91490350 |
| chr1 | 91533350 | 91533450 | 1100-Lng-A-T | 71  | chr1:91533350-91533450 |
| chr1 | 91660950 | 91661050 | 1223-Lng-C-T | 51  | chr1:91660950-91661050 |
| chr1 | 91663650 | 91663750 | 901-Lng-A-T  | 50  | chr1:91663650-91663750 |
| chr1 | 92290450 | 92290550 | 1072-Lng-A-T | 72  | chr1:92290450-92290550 |
| chr1 | 92296650 | 92296750 | 1072-Lng-A-T | 381 | chr1:92296650-92296750 |
| chr1 | 92484850 | 92484950 | 1188-Lng-A-T | 97  | chr1:92484850-92484950 |
| chr1 | 92612450 | 92612550 | 1004-Lng-A-T | 51  | chr1:92612450-92612550 |
| chr1 | 92643450 | 92643550 | 1167-Lng-A-T | 58  | chr1:92643450-92643550 |
| chr1 | 92822350 | 92822450 | 1223-Lng-C-T | 65  | chr1:92822350-92822450 |
| chr1 | 92943450 | 92943550 | 1065-Lng-B-T | 45  | chr1:92943450-92943550 |
| chr1 | 92956450 | 92956550 | 1100-Lng-A-T | 63  | chr1:92956450-92956550 |
| chr1 | 92967550 | 92967650 | 1072-Lng-A-T | 64  | chr1:92967550-92967650 |
| chr1 | 92980650 | 92980750 | 1152-Lng-A-T | 249 | chr1:92980650-92980750 |
| chr1 | 93000250 | 93000350 | 901-Lng-D-T  | 373 | chr1:93000250-93000350 |
| chr1 | 93046550 | 93046650 | 1188-Lng-A-T | 120 | chr1:93046550-93046650 |
| chr1 | 93108150 | 93108250 | 1188-Lng-A-T | 36  | chr1:93108150-93108250 |
| chr1 | 93145750 | 93145850 | 1152-Lng-A-T | 162 | chr1:93145750-93145850 |
| chr1 | 93147950 | 93148050 | 1223-Lng-D-T | 44  | chr1:93147950-93148050 |
| chr1 | 93153250 | 93153350 | 1065-Lng-A-T | 244 | chr1:93153250-93153350 |
| chr1 | 93157150 | 93157250 | 1004-Lng-A-T | 92  | chr1:93157150-93157250 |
| chr1 | 93203550 | 93203650 | 1065-Lng-B-T | 67  | chr1:93203550-93203650 |
| chr1 | 93211850 | 93211950 | 901-Lng-B-T  | 55  | chr1:93211850-93211950 |
| chr1 | 93270350 | 93270450 | 1223-Lng-D-T | 88  | chr1:93270350-93270450 |
| chr1 | 93502350 | 93502450 | 1090-Lng-B-T | 781 | chr1:93502350-93502450 |
| chr1 | 93746450 | 93746550 | 1090-Lng-A-T | 129 | chr1:93746450-93746550 |
| chr1 | 93753950 | 93754050 | 1223-Lng-C-T | 49  | chr1:93753950-93754050 |
| chr1 | 93958950 | 93959050 | 901-Lng-C-T  | 85  | chr1:93958950-93959050 |
| chr1 | 93969250 | 93969350 | 1167-Lng-A-T | 147 | chr1:93969250-93969350 |
| chr1 | 94002650 | 94002750 | 1004-Lng-A-T | 70  | chr1:94002650-94002750 |
| chr1 | 94046050 | 94046150 | 1223-Lng-A-T | 178 | chr1:94046050-94046150 |
| chr1 | 94065350 | 94065450 | 1065-Lng-C-T | 129 | chr1:94065350-94065450 |
| chr1 | 94071350 | 94071450 | 1188-Lng-A-T | 49  | chr1:94071350-94071450 |
| chr1 | 95131450 | 95131550 | 846-Lng-A-T  | 138 | chr1:95131450-95131550 |
| chr1 | 95134450 | 95134550 | 901-Lng-A-T  | 84  | chr1:95134450-95134550 |
| chr1 | 95234550 | 95234650 | 901-Lng-A-T  | 94  | chr1:95234550-95234650 |
| chr1 | 95240950 | 95241050 | 1167-Lng-A-T | 76  | chr1:95240950-95241050 |
| chr1 | 95307250 | 95307350 | 1065-Lng-A-T | 47  | chr1:95307250-95307350 |
| chr1 | 95488150 | 95488250 | 1090-Lng-A-T | 55  | chr1:95488150-95488250 |
| chr1 | 95655550 | 95655650 | 1223-Lng-C-T | 164 | chr1:95655550-95655650 |
| chr1 | 95674250 | 95674350 | 901-Lng-C-T  | 140 | chr1:95674250-95674350 |
| chr1 | 96069750 | 96069850 | 1223-Lng-C-T | 54  | chr1:96069750-96069850 |
| chr1 | 96236250 | 96236350 | 1004-Lng-A-T | 122 | chr1:96236250-96236350 |
| chr1 | 96260550 | 96260650 | 1065-Lng-C-T | 88  | chr1:96260550-96260650 |
| chr1 | 96424050 | 96424150 | 1090-Lng-B-T | 531 | chr1:96424050-96424150 |

**Table S2: SB Insertion regions**

|      |          |          |              |     |                        |
|------|----------|----------|--------------|-----|------------------------|
| chr1 | 96450650 | 96450750 | 1004-Lng-A-T | 587 | chr1:96450650-96450750 |
| chr1 | 96523250 | 96523350 | 1188-Lng-A-T | 43  | chr1:96523250-96523350 |
| chr1 | 96856150 | 96856250 | 1274-Lng-A-T | 94  | chr1:96856150-96856250 |
| chr1 | 96856150 | 96856250 | 901-Lng-A-T  | 199 | chr1:96856150-96856250 |
| chr1 | 96856150 | 96856250 | 1090-Lng-B-T | 119 | chr1:96856150-96856250 |
| chr1 | 96856150 | 96856250 | 901-Lng-C-T  | 117 | chr1:96856150-96856250 |
| chr1 | 96856150 | 96856250 | 901-Lng-D-T  | 81  | chr1:96856150-96856250 |
| chr1 | 96856150 | 96856250 | 1188-Lng-A-T | 115 | chr1:96856150-96856250 |
| chr1 | 96856150 | 96856250 | 1152-Lng-A-T | 95  | chr1:96856150-96856250 |
| chr1 | 96856150 | 96856250 | 1065-Lng-A-T | 43  | chr1:96856150-96856250 |
| chr1 | 96856150 | 96856250 | 1072-Lng-A-T | 84  | chr1:96856150-96856250 |
| chr1 | 96856150 | 96856250 | 1223-Lng-D-T | 49  | chr1:96856150-96856250 |
| chr1 | 96856150 | 96856250 | 846-Lng-A-T  | 229 | chr1:96856150-96856250 |
| chr1 | 96881750 | 96881850 | 1004-Lng-A-T | 53  | chr1:96881750-96881850 |
| chr1 | 96908050 | 96908150 | 1151-Lng-A-T | 59  | chr1:96908050-96908150 |
| chr1 | 96955850 | 96955950 | 1274-Lng-A-T | 74  | chr1:96955850-96955950 |
| chr1 | 96979250 | 96979350 | 901-Lng-B-T  | 48  | chr1:96979250-96979350 |
| chr1 | 96999850 | 96999950 | 1065-Lng-A-T | 54  | chr1:96999850-96999950 |
| chr1 | 97037550 | 97037650 | 846-Lng-A-T  | 44  | chr1:97037550-97037650 |
| chr1 | 97206150 | 97206250 | 1223-Lng-B-T | 162 | chr1:97206150-97206250 |
| chr1 | 97213950 | 97214050 | 846-Lng-A-T  | 51  | chr1:97213950-97214050 |
| chr1 | 97224950 | 97225050 | 1188-Lng-A-T | 194 | chr1:97224950-97225050 |
| chr1 | 97235750 | 97235850 | 846-Lng-A-T  | 125 | chr1:97235750-97235850 |
| chr1 | 97260850 | 97260950 | 1274-Lng-A-T | 65  | chr1:97260850-97260950 |
| chr1 | 97437150 | 97437250 | 1004-Lng-A-T | 78  | chr1:97437150-97437250 |
| chr1 | 97619450 | 97619550 | 1223-Lng-A-T | 57  | chr1:97619450-97619550 |
| chr1 | 97668350 | 97668450 | 1223-Lng-B-T | 98  | chr1:97668350-97668450 |
| chr1 | 97723350 | 97723450 | 901-Lng-B-T  | 75  | chr1:97723350-97723450 |
| chr1 | 97996450 | 97996550 | 846-Lng-A-T  | 137 | chr1:97996450-97996550 |
| chr1 | 98022950 | 98023050 | 1072-Lng-A-T | 66  | chr1:98022950-98023050 |
| chr1 | 98050850 | 98050950 | 1152-Lng-A-T | 48  | chr1:98050850-98050950 |
| chr1 | 98135050 | 98135150 | 1152-Lng-A-T | 69  | chr1:98135050-98135150 |
| chr1 | 98204650 | 98204750 | 1090-Lng-A-T | 130 | chr1:98204650-98204750 |
| chr1 | 98481050 | 98481150 | 1065-Lng-B-T | 88  | chr1:98481050-98481150 |
| chr1 | 98546850 | 98546950 | 1090-Lng-A-T | 65  | chr1:98546850-98546950 |
| chr1 | 98711850 | 98711950 | 1100-Lng-A-T | 52  | chr1:98711850-98711950 |
| chr1 | 98739050 | 98739150 | 1152-Lng-A-T | 38  | chr1:98739050-98739150 |
| chr1 | 98756050 | 98756150 | 901-Lng-D-T  | 110 | chr1:98756050-98756150 |
| chr1 | 98792350 | 98792450 | 1065-Lng-A-T | 34  | chr1:98792350-98792450 |
| chr1 | 98833350 | 98833450 | 1100-Lng-A-T | 57  | chr1:98833350-98833450 |
| chr1 | 98890350 | 98890450 | 901-Lng-D-T  | 38  | chr1:98890350-98890450 |
| chr1 | 99012950 | 99013050 | 1072-Lng-A-T | 76  | chr1:99012950-99013050 |
| chr1 | 99528150 | 99528250 | 846-Lng-A-T  | 112 | chr1:99528150-99528250 |
| chr1 | 99548550 | 99548650 | 901-Lng-A-T  | 123 | chr1:99548550-99548650 |
| chr1 | 99832750 | 99832850 | 846-Lng-A-T  | 260 | chr1:99832750-99832850 |
| chr1 | 99846450 | 99846550 | 1065-Lng-B-T | 42  | chr1:99846450-99846550 |

**Table S2: SB Insertion regions**

|      |           |           |              |      |                          |
|------|-----------|-----------|--------------|------|--------------------------|
| chr1 | 99865250  | 99865350  | 901-Lng-B-T  | 184  | chr1:99865250-99865350   |
| chr1 | 99883450  | 99883550  | 1065-Lng-C-T | 1021 | chr1:99883450-99883550   |
| chr1 | 99969150  | 99969250  | 1004-Lng-A-T | 225  | chr1:99969150-99969250   |
| chr1 | 100004050 | 100004150 | 901-Lng-A-T  | 62   | chr1:100004050-100004150 |
| chr1 | 100362350 | 100362450 | 901-Lng-A-T  | 84   | chr1:100362350-100362450 |
| chr1 | 100504350 | 100504450 | 1223-Lng-A-T | 79   | chr1:100504350-100504450 |
| chr1 | 100577050 | 100577150 | 1152-Lng-A-T | 47   | chr1:100577050-100577150 |
| chr1 | 100623750 | 100623850 | 1152-Lng-A-T | 109  | chr1:100623750-100623850 |
| chr1 | 100632850 | 100632950 | 1004-Lng-A-T | 87   | chr1:100632850-100632950 |
| chr1 | 101189950 | 101190050 | 1152-Lng-A-T | 50   | chr1:101189950-101190050 |
| chr1 | 101344650 | 101344750 | 901-Lng-A-T  | 64   | chr1:101344650-101344750 |
| chr1 | 101372250 | 101372350 | 1072-Lng-A-T | 154  | chr1:101372250-101372350 |
| chr1 | 101381050 | 101381150 | 901-Lng-A-T  | 96   | chr1:101381050-101381150 |
| chr1 | 101523750 | 101523850 | 1152-Lng-A-T | 110  | chr1:101523750-101523850 |
| chr1 | 102142250 | 102142350 | 901-Lng-C-T  | 126  | chr1:102142250-102142350 |
| chr1 | 102154350 | 102154450 | 1223-Lng-D-T | 56   | chr1:102154350-102154450 |
| chr1 | 102193350 | 102193450 | 1188-Lng-A-T | 36   | chr1:102193350-102193450 |
| chr1 | 102271950 | 102272050 | 1065-Lng-A-T | 124  | chr1:102271950-102272050 |
| chr1 | 102288050 | 102288150 | 1065-Lng-C-T | 92   | chr1:102288050-102288150 |
| chr1 | 102494350 | 102494450 | 901-Lng-A-T  | 56   | chr1:102494350-102494450 |
| chr1 | 102515150 | 102515250 | 846-Lng-A-T  | 97   | chr1:102515150-102515250 |
| chr1 | 102609250 | 102609350 | 1223-Lng-C-T | 43   | chr1:102609250-102609350 |
| chr1 | 102765250 | 102765350 | 1065-Lng-C-T | 241  | chr1:102765250-102765350 |
| chr1 | 102809450 | 102809550 | 1004-Lng-A-T | 108  | chr1:102809450-102809550 |
| chr1 | 102827250 | 102827350 | 1065-Lng-B-T | 62   | chr1:102827250-102827350 |
| chr1 | 102834250 | 102834350 | 1004-Lng-A-T | 68   | chr1:102834250-102834350 |
| chr1 | 103027550 | 103027650 | 1223-Lng-B-T | 175  | chr1:103027550-103027650 |
| chr1 | 103112350 | 103112450 | 1152-Lng-A-T | 233  | chr1:103112350-103112450 |
| chr1 | 103114450 | 103114550 | 1065-Lng-B-T | 59   | chr1:103114450-103114550 |
| chr1 | 103263350 | 103263450 | 1100-Lng-A-T | 55   | chr1:103263350-103263450 |
| chr1 | 103465550 | 103465650 | 1065-Lng-B-T | 67   | chr1:103465550-103465650 |
| chr1 | 103540950 | 103541050 | 1223-Lng-C-T | 46   | chr1:103540950-103541050 |
| chr1 | 104132650 | 104132750 | 1152-Lng-A-T | 163  | chr1:104132650-104132750 |
| chr1 | 104189950 | 104190050 | 1072-Lng-A-T | 50   | chr1:104189950-104190050 |
| chr1 | 104269050 | 104269150 | 1274-Lng-A-T | 102  | chr1:104269050-104269150 |
| chr1 | 104618250 | 104618350 | 1152-Lng-A-T | 42   | chr1:104618250-104618350 |
| chr1 | 104706250 | 104706350 | 1065-Lng-A-T | 51   | chr1:104706250-104706350 |
| chr1 | 104740950 | 104741050 | 901-Lng-D-T  | 425  | chr1:104740950-104741050 |
| chr1 | 104800050 | 104800150 | 1065-Lng-A-T | 52   | chr1:104800050-104800150 |
| chr1 | 105019050 | 105019150 | 1090-Lng-A-T | 50   | chr1:105019050-105019150 |
| chr1 | 105560150 | 105560250 | 1065-Lng-B-T | 62   | chr1:105560150-105560250 |
| chr1 | 105651950 | 105652050 | 1065-Lng-B-T | 102  | chr1:105651950-105652050 |
| chr1 | 105670450 | 105670550 | 1065-Lng-C-T | 122  | chr1:105670450-105670550 |
| chr1 | 106038350 | 106038450 | 901-Lng-C-T  | 124  | chr1:106038350-106038450 |
| chr1 | 106381950 | 106382050 | 1188-Lng-A-T | 56   | chr1:106381950-106382050 |
| chr1 | 106418450 | 106418550 | 1090-Lng-B-T | 748  | chr1:106418450-106418550 |

**Table S2: SB Insertion regions**

|      |           |           |              |     |                          |
|------|-----------|-----------|--------------|-----|--------------------------|
| chr1 | 106590750 | 106590850 | 1004-Lng-A-T | 74  | chr1:106590750-106590850 |
| chr1 | 106694950 | 106695050 | 1065-Lng-C-T | 85  | chr1:106694950-106695050 |
| chr1 | 107227450 | 107227550 | 1188-Lng-A-T | 115 | chr1:107227450-107227550 |
| chr1 | 107512350 | 107512450 | 1188-Lng-A-T | 71  | chr1:107512350-107512450 |
| chr1 | 107520650 | 107520750 | 1223-Lng-A-T | 149 | chr1:107520650-107520750 |
| chr1 | 107611450 | 107611550 | 1167-Lng-A-T | 68  | chr1:107611450-107611550 |
| chr1 | 107687050 | 107687150 | 901-Lng-A-T  | 310 | chr1:107687050-107687150 |
| chr1 | 107892550 | 107892650 | 1090-Lng-B-T | 82  | chr1:107892550-107892650 |
| chr1 | 107900550 | 107900650 | 1072-Lng-A-T | 53  | chr1:107900550-107900650 |
| chr1 | 107929850 | 107929950 | 1072-Lng-A-T | 64  | chr1:107929850-107929950 |
| chr1 | 108035050 | 108035150 | 1065-Lng-B-T | 40  | chr1:108035050-108035150 |
| chr1 | 108089250 | 108089350 | 1274-Lng-A-T | 83  | chr1:108089250-108089350 |
| chr1 | 108160650 | 108160750 | 1072-Lng-A-T | 145 | chr1:108160650-108160750 |
| chr1 | 108253550 | 108253650 | 1167-Lng-A-T | 63  | chr1:108253550-108253650 |
| chr1 | 108260650 | 108260750 | 901-Lng-B-T  | 181 | chr1:108260650-108260750 |
| chr1 | 108346550 | 108346650 | 901-Lng-A-T  | 172 | chr1:108346550-108346650 |
| chr1 | 108356950 | 108357050 | 1090-Lng-A-T | 76  | chr1:108356950-108357050 |
| chr1 | 108576950 | 108577050 | 901-Lng-A-T  | 82  | chr1:108576950-108577050 |
| chr1 | 108609650 | 108609750 | 1274-Lng-A-T | 51  | chr1:108609650-108609750 |
| chr1 | 108624450 | 108624550 | 1072-Lng-A-T | 205 | chr1:108624450-108624550 |
| chr1 | 108666750 | 108666850 | 846-Lng-A-T  | 172 | chr1:108666750-108666850 |
| chr1 | 108715150 | 108715250 | 1090-Lng-B-T | 335 | chr1:108715150-108715250 |
| chr1 | 108760550 | 108760650 | 901-Lng-C-T  | 102 | chr1:108760550-108760650 |
| chr1 | 108804050 | 108804150 | 1188-Lng-A-T | 37  | chr1:108804050-108804150 |
| chr1 | 108980650 | 108980750 | 901-Lng-B-T  | 91  | chr1:108980650-108980750 |
| chr1 | 109148750 | 109148850 | 901-Lng-B-T  | 62  | chr1:109148750-109148850 |
| chr1 | 109148750 | 109148850 | 901-Lng-A-T  | 52  | chr1:109148750-109148850 |
| chr1 | 109148750 | 109148850 | 1223-Lng-B-T | 49  | chr1:109148750-109148850 |
| chr1 | 109218250 | 109218350 | 1065-Lng-A-T | 43  | chr1:109218250-109218350 |
| chr1 | 109282350 | 109282450 | 1004-Lng-A-T | 191 | chr1:109282350-109282450 |
| chr1 | 109286350 | 109286450 | 901-Lng-A-T  | 60  | chr1:109286350-109286450 |
| chr1 | 109551950 | 109552050 | 901-Lng-C-T  | 104 | chr1:109551950-109552050 |
| chr1 | 109926050 | 109926150 | 1065-Lng-A-T | 80  | chr1:109926050-109926150 |
| chr1 | 109942450 | 109942550 | 1223-Lng-B-T | 39  | chr1:109942450-109942550 |
| chr1 | 110002350 | 110002450 | 901-Lng-B-T  | 67  | chr1:110002350-110002450 |
| chr1 | 110032350 | 110032450 | 1100-Lng-A-T | 69  | chr1:110032350-110032450 |
| chr1 | 110063050 | 110063150 | 1223-Lng-C-T | 48  | chr1:110063050-110063150 |
| chr1 | 110078250 | 110078350 | 901-Lng-B-T  | 66  | chr1:110078250-110078350 |
| chr1 | 110099650 | 110099750 | 901-Lng-B-T  | 234 | chr1:110099650-110099750 |
| chr1 | 110178350 | 110178450 | 1188-Lng-A-T | 100 | chr1:110178350-110178450 |
| chr1 | 110237550 | 110237650 | 1223-Lng-B-T | 36  | chr1:110237550-110237650 |
| chr1 | 110329150 | 110329250 | 1090-Lng-B-T | 577 | chr1:110329150-110329250 |
| chr1 | 110571450 | 110571550 | 1072-Lng-A-T | 51  | chr1:110571450-110571550 |
| chr1 | 110625450 | 110625550 | 901-Lng-C-T  | 46  | chr1:110625450-110625550 |
| chr1 | 111319150 | 111319250 | 1151-Lng-A-T | 248 | chr1:111319150-111319250 |
| chr1 | 111392750 | 111392850 | 1072-Lng-A-T | 168 | chr1:111392750-111392850 |

**Table S2: SB Insertion regions**

|      |           |           |              |     |                          |
|------|-----------|-----------|--------------|-----|--------------------------|
| chr1 | 111642450 | 111642550 | 901-Lng-A-T  | 360 | chr1:111642450-111642550 |
| chr1 | 111927650 | 111927750 | 1065-Lng-A-T | 36  | chr1:111927650-111927750 |
| chr1 | 111928050 | 111928150 | 901-Lng-A-T  | 78  | chr1:111928050-111928150 |
| chr1 | 112007450 | 112007550 | 901-Lng-B-T  | 151 | chr1:112007450-112007550 |
| chr1 | 112158450 | 112158550 | 1223-Lng-A-T | 83  | chr1:112158450-112158550 |
| chr1 | 112288050 | 112288150 | 1065-Lng-B-T | 177 | chr1:112288050-112288150 |
| chr1 | 112311350 | 112311450 | 1004-Lng-A-T | 98  | chr1:112311350-112311450 |
| chr1 | 112351750 | 112351850 | 1152-Lng-A-T | 38  | chr1:112351750-112351850 |
| chr1 | 112508350 | 112508450 | 1223-Lng-C-T | 57  | chr1:112508350-112508450 |
| chr1 | 112608650 | 112608750 | 1152-Lng-A-T | 38  | chr1:112608650-112608750 |
| chr1 | 112722150 | 112722250 | 1274-Lng-A-T | 52  | chr1:112722150-112722250 |
| chr1 | 112809550 | 112809650 | 1223-Lng-B-T | 38  | chr1:112809550-112809650 |
| chr1 | 112825550 | 112825650 | 1090-Lng-B-T | 828 | chr1:112825550-112825650 |
| chr1 | 112885950 | 112886050 | 1004-Lng-A-T | 80  | chr1:112885950-112886050 |
| chr1 | 113066850 | 113066950 | 1223-Lng-A-T | 113 | chr1:113066850-113066950 |
| chr1 | 113148850 | 113148950 | 1167-Lng-A-T | 413 | chr1:113148850-113148950 |
| chr1 | 113449850 | 113449950 | 1223-Lng-B-T | 34  | chr1:113449850-113449950 |
| chr1 | 113575050 | 113575150 | 1090-Lng-A-T | 72  | chr1:113575050-113575150 |
| chr1 | 113946150 | 113946250 | 1065-Lng-B-T | 66  | chr1:113946150-113946250 |
| chr1 | 114230150 | 114230250 | 1100-Lng-A-T | 68  | chr1:114230150-114230250 |
| chr1 | 114310650 | 114310750 | 1274-Lng-A-T | 59  | chr1:114310650-114310750 |
| chr1 | 114348150 | 114348250 | 1274-Lng-A-T | 105 | chr1:114348150-114348250 |
| chr1 | 114641250 | 114641350 | 1223-Lng-A-T | 217 | chr1:114641250-114641350 |
| chr1 | 114654750 | 114654850 | 901-Lng-A-T  | 122 | chr1:114654750-114654850 |
| chr1 | 114711650 | 114711750 | 1223-Lng-A-T | 409 | chr1:114711650-114711750 |
| chr1 | 114942550 | 114942650 | 1223-Lng-B-T | 65  | chr1:114942550-114942650 |
| chr1 | 115051850 | 115051950 | 901-Lng-C-T  | 53  | chr1:115051850-115051950 |
| chr1 | 115094550 | 115094650 | 1274-Lng-A-T | 123 | chr1:115094550-115094650 |
| chr1 | 115451850 | 115451950 | 901-Lng-A-T  | 133 | chr1:115451850-115451950 |
| chr1 | 115472050 | 115472150 | 1223-Lng-B-T | 34  | chr1:115472050-115472150 |
| chr1 | 115553050 | 115553150 | 1004-Lng-A-T | 67  | chr1:115553050-115553150 |
| chr1 | 115774650 | 115774750 | 1072-Lng-A-T | 169 | chr1:115774650-115774750 |
| chr1 | 116024450 | 116024550 | 1065-Lng-A-T | 56  | chr1:116024450-116024550 |
| chr1 | 116147050 | 116147150 | 1065-Lng-B-T | 155 | chr1:116147050-116147150 |
| chr1 | 116155950 | 116156050 | 1274-Lng-A-T | 56  | chr1:116155950-116156050 |
| chr1 | 116160150 | 116160250 | 1065-Lng-A-T | 74  | chr1:116160150-116160250 |
| chr1 | 116164950 | 116165050 | 1090-Lng-A-T | 45  | chr1:116164950-116165050 |
| chr1 | 116340850 | 116340950 | 1223-Lng-A-T | 77  | chr1:116340850-116340950 |
| chr1 | 116443750 | 116443850 | 1223-Lng-B-T | 45  | chr1:116443750-116443850 |
| chr1 | 116452650 | 116452750 | 1065-Lng-C-T | 89  | chr1:116452650-116452750 |
| chr1 | 116643750 | 116643850 | 1274-Lng-A-T | 134 | chr1:116643750-116643850 |
| chr1 | 116894850 | 116894950 | 1152-Lng-A-T | 42  | chr1:116894850-116894950 |
| chr1 | 116929750 | 116929850 | 1004-Lng-A-T | 73  | chr1:116929750-116929850 |
| chr1 | 116989750 | 116989850 | 1152-Lng-A-T | 53  | chr1:116989750-116989850 |
| chr1 | 117087250 | 117087350 | 846-Lng-A-T  | 114 | chr1:117087250-117087350 |
| chr1 | 117301850 | 117301950 | 901-Lng-B-T  | 239 | chr1:117301850-117301950 |

**Table S2: SB Insertion regions**

|      |           |           |              |     |                          |
|------|-----------|-----------|--------------|-----|--------------------------|
| chr1 | 117386550 | 117386650 | 1167-Lng-A-T | 63  | chr1:117386550-117386650 |
| chr1 | 117594050 | 117594150 | 901-Lng-D-T  | 515 | chr1:117594050-117594150 |
| chr1 | 117709750 | 117709850 | 1004-Lng-A-T | 60  | chr1:117709750-117709850 |
| chr1 | 117752450 | 117752550 | 1065-Lng-A-T | 85  | chr1:117752450-117752550 |
| chr1 | 117768550 | 117768650 | 846-Lng-A-T  | 118 | chr1:117768550-117768650 |
| chr1 | 117808650 | 117808750 | 901-Lng-C-T  | 62  | chr1:117808650-117808750 |
| chr1 | 118104650 | 118104750 | 1151-Lng-A-T | 89  | chr1:118104650-118104750 |
| chr1 | 118249150 | 118249250 | 1065-Lng-B-T | 43  | chr1:118249150-118249250 |
| chr1 | 118331150 | 118331250 | 1223-Lng-B-T | 328 | chr1:118331150-118331250 |
| chr1 | 118406750 | 118406850 | 1065-Lng-B-T | 257 | chr1:118406750-118406850 |
| chr1 | 118488250 | 118488350 | 901-Lng-A-T  | 104 | chr1:118488250-118488350 |
| chr1 | 118519150 | 118519250 | 1065-Lng-B-T | 78  | chr1:118519150-118519250 |
| chr1 | 118691850 | 118691950 | 846-Lng-A-T  | 67  | chr1:118691850-118691950 |
| chr1 | 118717950 | 118718050 | 1004-Lng-A-T | 56  | chr1:118717950-118718050 |
| chr1 | 118869950 | 118870050 | 846-Lng-A-T  | 373 | chr1:118869950-118870050 |
| chr1 | 118878350 | 118878450 | 846-Lng-A-T  | 82  | chr1:118878350-118878450 |
| chr1 | 118904250 | 118904350 | 1274-Lng-A-T | 92  | chr1:118904250-118904350 |
| chr1 | 118905350 | 118905450 | 1004-Lng-A-T | 84  | chr1:118905350-118905450 |
| chr1 | 118926050 | 118926150 | 1065-Lng-A-T | 48  | chr1:118926050-118926150 |
| chr1 | 118933850 | 118933950 | 1065-Lng-B-T | 380 | chr1:118933850-118933950 |
| chr1 | 118941150 | 118941250 | 1223-Lng-D-T | 43  | chr1:118941150-118941250 |
| chr1 | 118953150 | 118953250 | 1152-Lng-A-T | 62  | chr1:118953150-118953250 |
| chr1 | 118960650 | 118960750 | 901-Lng-A-T  | 200 | chr1:118960650-118960750 |
| chr1 | 119265150 | 119265250 | 1188-Lng-A-T | 246 | chr1:119265150-119265250 |
| chr1 | 119277650 | 119277750 | 901-Lng-A-T  | 97  | chr1:119277650-119277750 |
| chr1 | 120202050 | 120202150 | 1152-Lng-A-T | 66  | chr1:120202050-120202150 |
| chr1 | 120335350 | 120335450 | 901-Lng-D-T  | 280 | chr1:120335350-120335450 |
| chr1 | 120354250 | 120354350 | 1274-Lng-A-T | 163 | chr1:120354250-120354350 |
| chr1 | 120380950 | 120381050 | 901-Lng-D-T  | 369 | chr1:120380950-120381050 |
| chr1 | 120398250 | 120398350 | 1274-Lng-A-T | 58  | chr1:120398250-120398350 |
| chr1 | 120431350 | 120431450 | 1151-Lng-A-T | 96  | chr1:120431350-120431450 |
| chr1 | 120494850 | 120494950 | 1274-Lng-A-T | 110 | chr1:120494850-120494950 |
| chr1 | 120498150 | 120498250 | 901-Lng-B-T  | 66  | chr1:120498150-120498250 |
| chr1 | 120554150 | 120554250 | 1065-Lng-A-T | 42  | chr1:120554150-120554250 |
| chr1 | 120575350 | 120575450 | 1223-Lng-B-T | 98  | chr1:120575350-120575450 |
| chr1 | 120737750 | 120737850 | 1152-Lng-A-T | 160 | chr1:120737750-120737850 |
| chr1 | 121042550 | 121042650 | 901-Lng-C-T  | 52  | chr1:121042550-121042650 |
| chr1 | 121072050 | 121072150 | 1072-Lng-A-T | 492 | chr1:121072050-121072150 |
| chr1 | 121205650 | 121205750 | 1100-Lng-A-T | 96  | chr1:121205650-121205750 |
| chr1 | 121211450 | 121211550 | 1274-Lng-A-T | 68  | chr1:121211450-121211550 |
| chr1 | 121229950 | 121230050 | 1274-Lng-A-T | 61  | chr1:121229950-121230050 |
| chr1 | 121269350 | 121269450 | 1274-Lng-A-T | 123 | chr1:121269350-121269450 |
| chr1 | 121308950 | 121309050 | 1100-Lng-A-T | 101 | chr1:121308950-121309050 |
| chr1 | 121351050 | 121351150 | 1223-Lng-A-T | 124 | chr1:121351050-121351150 |
| chr1 | 121351850 | 121351950 | 1065-Lng-A-T | 62  | chr1:121351850-121351950 |
| chr1 | 121360350 | 121360450 | 901-Lng-A-T  | 338 | chr1:121360350-121360450 |

**Table S2: SB Insertion regions**

|      |           |           |              |      |                          |
|------|-----------|-----------|--------------|------|--------------------------|
| chr1 | 121500050 | 121500150 | 1151-Lng-A-T | 4377 | chr1:121500050-121500150 |
| chr1 | 121542550 | 121542650 | 901-Lng-B-T  | 46   | chr1:121542550-121542650 |
| chr1 | 121687450 | 121687550 | 1188-Lng-A-T | 35   | chr1:121687450-121687550 |
| chr1 | 121777350 | 121777450 | 1223-Lng-C-T | 60   | chr1:121777350-121777450 |
| chr1 | 122819550 | 122819650 | 1223-Lng-B-T | 42   | chr1:122819550-122819650 |
| chr1 | 123381950 | 123382050 | 1167-Lng-A-T | 64   | chr1:123381950-123382050 |
| chr1 | 123546850 | 123546950 | 1100-Lng-A-T | 73   | chr1:123546850-123546950 |
| chr1 | 123630150 | 123630250 | 901-Lng-B-T  | 64   | chr1:123630150-123630250 |
| chr1 | 123666950 | 123667050 | 1090-Lng-A-T | 56   | chr1:123666950-123667050 |
| chr1 | 123818850 | 123818950 | 1223-Lng-C-T | 43   | chr1:123818850-123818950 |
| chr1 | 123952550 | 123952650 | 1072-Lng-A-T | 62   | chr1:123952550-123952650 |
| chr1 | 123958650 | 123958750 | 1004-Lng-A-T | 62   | chr1:123958650-123958750 |
| chr1 | 124011750 | 124011850 | 1223-Lng-D-T | 42   | chr1:124011750-124011850 |
| chr1 | 124127850 | 124127950 | 901-Lng-A-T  | 94   | chr1:124127850-124127950 |
| chr1 | 124150350 | 124150450 | 901-Lng-C-T  | 100  | chr1:124150350-124150450 |
| chr1 | 124207450 | 124207550 | 1065-Lng-B-T | 55   | chr1:124207450-124207550 |
| chr1 | 124589450 | 124589550 | 1152-Lng-A-T | 50   | chr1:124589450-124589550 |
| chr1 | 124599950 | 124600050 | 1223-Lng-B-T | 48   | chr1:124599950-124600050 |
| chr1 | 124885250 | 124885350 | 846-Lng-A-T  | 96   | chr1:124885250-124885350 |
| chr1 | 125321150 | 125321250 | 901-Lng-A-T  | 78   | chr1:125321150-125321250 |
| chr1 | 125374850 | 125374950 | 1152-Lng-A-T | 57   | chr1:125374850-125374950 |
| chr1 | 125377050 | 125377150 | 901-Lng-D-T  | 53   | chr1:125377050-125377150 |
| chr1 | 125696750 | 125696850 | 1152-Lng-A-T | 61   | chr1:125696750-125696850 |
| chr1 | 125733850 | 125733950 | 1100-Lng-B-T | 57   | chr1:125733850-125733950 |
| chr1 | 125810250 | 125810350 | 1072-Lng-A-T | 85   | chr1:125810250-125810350 |
| chr1 | 125848550 | 125848650 | 1072-Lng-A-T | 48   | chr1:125848550-125848650 |
| chr1 | 125940050 | 125940150 | 1065-Lng-A-T | 40   | chr1:125940050-125940150 |
| chr1 | 126025150 | 126025250 | 1188-Lng-A-T | 35   | chr1:126025150-126025250 |
| chr1 | 126143750 | 126143850 | 846-Lng-A-T  | 146  | chr1:126143750-126143850 |
| chr1 | 126181750 | 126181850 | 1065-Lng-B-T | 128  | chr1:126181750-126181850 |
| chr1 | 126295350 | 126295450 | 1004-Lng-A-T | 63   | chr1:126295350-126295450 |
| chr1 | 126506750 | 126506850 | 1065-Lng-B-T | 67   | chr1:126506750-126506850 |
| chr1 | 126646650 | 126646750 | 901-Lng-C-T  | 143  | chr1:126646650-126646750 |
| chr1 | 126767250 | 126767350 | 1004-Lng-A-T | 930  | chr1:126767250-126767350 |
| chr1 | 126915450 | 126915550 | 1100-Lng-B-T | 53   | chr1:126915450-126915550 |
| chr1 | 126917450 | 126917550 | 1274-Lng-A-T | 65   | chr1:126917450-126917550 |
| chr1 | 126962550 | 126962650 | 846-Lng-A-T  | 69   | chr1:126962550-126962650 |
| chr1 | 127232250 | 127232350 | 901-Lng-A-T  | 282  | chr1:127232250-127232350 |
| chr1 | 127301550 | 127301650 | 1090-Lng-A-T | 1521 | chr1:127301550-127301650 |
| chr1 | 127467350 | 127467450 | 1065-Lng-B-T | 87   | chr1:127467350-127467450 |
| chr1 | 127636250 | 127636350 | 901-Lng-C-T  | 32   | chr1:127636250-127636350 |
| chr1 | 127816250 | 127816350 | 1065-Lng-B-T | 68   | chr1:127816250-127816350 |
| chr1 | 127838350 | 127838450 | 1188-Lng-A-T | 53   | chr1:127838350-127838450 |
| chr1 | 127844150 | 127844250 | 1152-Lng-A-T | 103  | chr1:127844150-127844250 |
| chr1 | 127844950 | 127845050 | 1188-Lng-A-T | 40   | chr1:127844950-127845050 |
| chr1 | 127848950 | 127849050 | 1100-Lng-A-T | 77   | chr1:127848950-127849050 |

**Table S2: SB Insertion regions**

|      |           |           |              |     |                          |
|------|-----------|-----------|--------------|-----|--------------------------|
| chr1 | 127906250 | 127906350 | 901-Lng-C-T  | 216 | chr1:127906250-127906350 |
| chr1 | 127924850 | 127924950 | 901-Lng-C-T  | 75  | chr1:127924850-127924950 |
| chr1 | 127951450 | 127951550 | 1065-Lng-B-T | 73  | chr1:127951450-127951550 |
| chr1 | 127989150 | 127989250 | 901-Lng-A-T  | 341 | chr1:127989150-127989250 |
| chr1 | 127991950 | 127992050 | 901-Lng-D-T  | 291 | chr1:127991950-127992050 |
| chr1 | 128053250 | 128053350 | 1274-Lng-A-T | 94  | chr1:128053250-128053350 |
| chr1 | 128057150 | 128057250 | 1004-Lng-A-T | 75  | chr1:128057150-128057250 |
| chr1 | 128084750 | 128084850 | 901-Lng-C-T  | 87  | chr1:128084750-128084850 |
| chr1 | 128110250 | 128110350 | 1065-Lng-B-T | 46  | chr1:128110250-128110350 |
| chr1 | 128172550 | 128172650 | 1100-Lng-A-T | 94  | chr1:128172550-128172650 |
| chr1 | 128178050 | 128178150 | 1090-Lng-A-T | 71  | chr1:128178050-128178150 |
| chr1 | 128203750 | 128203850 | 1167-Lng-A-T | 97  | chr1:128203750-128203850 |
| chr1 | 128225150 | 128225250 | 901-Lng-B-T  | 72  | chr1:128225150-128225250 |
| chr1 | 128276550 | 128276650 | 1152-Lng-A-T | 40  | chr1:128276550-128276650 |
| chr1 | 128291450 | 128291550 | 901-Lng-C-T  | 120 | chr1:128291450-128291550 |
| chr1 | 128334350 | 128334450 | 1274-Lng-A-T | 142 | chr1:128334350-128334450 |
| chr1 | 128339150 | 128339250 | 1090-Lng-A-T | 103 | chr1:128339150-128339250 |
| chr1 | 128357950 | 128358050 | 1223-Lng-D-T | 43  | chr1:128357950-128358050 |
| chr1 | 128384350 | 128384450 | 901-Lng-B-T  | 145 | chr1:128384350-128384450 |
| chr1 | 128412850 | 128412950 | 1188-Lng-A-T | 37  | chr1:128412850-128412950 |
| chr1 | 128416050 | 128416150 | 1090-Lng-B-T | 725 | chr1:128416050-128416150 |
| chr1 | 128420250 | 128420350 | 1274-Lng-A-T | 70  | chr1:128420250-128420350 |
| chr1 | 128442050 | 128442150 | 1065-Lng-A-T | 460 | chr1:128442050-128442150 |
| chr1 | 128450350 | 128450450 | 1100-Lng-A-T | 112 | chr1:128450350-128450450 |
| chr1 | 128478950 | 128479050 | 1100-Lng-A-T | 71  | chr1:128478950-128479050 |
| chr1 | 128480650 | 128480750 | 901-Lng-C-T  | 57  | chr1:128480650-128480750 |
| chr1 | 128492350 | 128492450 | 846-Lng-A-T  | 93  | chr1:128492350-128492450 |
| chr1 | 128504650 | 128504750 | 1188-Lng-A-T | 375 | chr1:128504650-128504750 |
| chr1 | 128520050 | 128520150 | 1223-Lng-A-T | 269 | chr1:128520050-128520150 |
| chr1 | 128588050 | 128588150 | 1065-Lng-A-T | 38  | chr1:128588050-128588150 |
| chr1 | 128600350 | 128600450 | 1223-Lng-B-T | 169 | chr1:128600350-128600450 |
| chr1 | 128626250 | 128626350 | 1223-Lng-C-T | 331 | chr1:128626250-128626350 |
| chr1 | 128641850 | 128641950 | 1065-Lng-B-T | 393 | chr1:128641850-128641950 |
| chr1 | 128713850 | 128713950 | 1072-Lng-A-T | 220 | chr1:128713850-128713950 |
| chr1 | 128815850 | 128815950 | 1223-Lng-B-T | 45  | chr1:128815850-128815950 |
| chr1 | 129100850 | 129100950 | 1223-Lng-A-T | 245 | chr1:129100850-129100950 |
| chr1 | 129327550 | 129327650 | 1188-Lng-A-T | 47  | chr1:129327550-129327650 |
| chr1 | 129386250 | 129386350 | 1223-Lng-A-T | 206 | chr1:129386250-129386350 |
| chr1 | 129430450 | 129430550 | 1100-Lng-A-T | 51  | chr1:129430450-129430550 |
| chr1 | 129463150 | 129463250 | 1167-Lng-A-T | 108 | chr1:129463150-129463250 |
| chr1 | 129680650 | 129680750 | 1090-Lng-A-T | 45  | chr1:129680650-129680750 |
| chr1 | 129685650 | 129685750 | 1274-Lng-A-T | 106 | chr1:129685650-129685750 |
| chr1 | 129701150 | 129701250 | 1152-Lng-A-T | 61  | chr1:129701150-129701250 |
| chr1 | 129799550 | 129799650 | 1004-Lng-A-T | 72  | chr1:129799550-129799650 |
| chr1 | 129829750 | 129829850 | 1223-Lng-B-T | 34  | chr1:129829750-129829850 |
| chr1 | 129878150 | 129878250 | 1072-Lng-A-T | 212 | chr1:129878150-129878250 |



**Table S2: SB Insertion regions**

|      |           |           |              |      |                          |
|------|-----------|-----------|--------------|------|--------------------------|
| chr1 | 130001150 | 130001250 | 1100-Lng-A-T | 61   | chr1:130001150-130001250 |
| chr1 | 130023850 | 130023950 | 1223-Lng-A-T | 179  | chr1:130023850-130023950 |
| chr1 | 130274750 | 130274850 | 1100-Lng-B-T | 50   | chr1:130274750-130274850 |
| chr1 | 130288450 | 130288550 | 1223-Lng-C-T | 71   | chr1:130288450-130288550 |
| chr1 | 130363550 | 130363650 | 901-Lng-C-T  | 65   | chr1:130363550-130363650 |
| chr1 | 130519250 | 130519350 | 1090-Lng-A-T | 192  | chr1:130519250-130519350 |
| chr1 | 130581750 | 130581850 | 901-Lng-C-T  | 28   | chr1:130581750-130581850 |
| chr1 | 130681950 | 130682050 | 1274-Lng-A-T | 78   | chr1:130681950-130682050 |
| chr1 | 131035750 | 131035850 | 1065-Lng-A-T | 49   | chr1:131035750-131035850 |
| chr1 | 131151750 | 131151850 | 1065-Lng-A-T | 40   | chr1:131151750-131151850 |
| chr1 | 131498950 | 131499050 | 1072-Lng-A-T | 60   | chr1:131498950-131499050 |
| chr1 | 131702850 | 131702950 | 1151-Lng-A-T | 62   | chr1:131702850-131702950 |
| chr1 | 131704650 | 131704750 | 1274-Lng-A-T | 53   | chr1:131704650-131704750 |
| chr1 | 131882850 | 131882950 | 1065-Lng-A-T | 130  | chr1:131882850-131882950 |
| chr1 | 131887450 | 131887550 | 901-Lng-A-T  | 85   | chr1:131887450-131887550 |
| chr1 | 131890950 | 131891050 | 1152-Lng-A-T | 49   | chr1:131890950-131891050 |
| chr1 | 131996950 | 131997050 | 1065-Lng-B-T | 207  | chr1:131996950-131997050 |
| chr1 | 132189250 | 132189350 | 1274-Lng-A-T | 57   | chr1:132189250-132189350 |
| chr1 | 132315550 | 132315650 | 1223-Lng-A-T | 56   | chr1:132315550-132315650 |
| chr1 | 132557750 | 132557850 | 1152-Lng-A-T | 137  | chr1:132557750-132557850 |
| chr1 | 132609250 | 132609350 | 1223-Lng-B-T | 172  | chr1:132609250-132609350 |
| chr1 | 132680750 | 132680850 | 1223-Lng-B-T | 35   | chr1:132680750-132680850 |
| chr1 | 132955650 | 132955750 | 901-Lng-A-T  | 85   | chr1:132955650-132955750 |
| chr1 | 133012650 | 133012750 | 1100-Lng-A-T | 64   | chr1:133012650-133012750 |
| chr1 | 133068150 | 133068250 | 901-Lng-D-T  | 222  | chr1:133068150-133068250 |
| chr1 | 133069550 | 133069650 | 901-Lng-C-T  | 44   | chr1:133069550-133069650 |
| chr1 | 133294950 | 133295050 | 1065-Lng-B-T | 77   | chr1:133294950-133295050 |
| chr1 | 133345050 | 133345150 | 1188-Lng-A-T | 192  | chr1:133345050-133345150 |
| chr1 | 133355650 | 133355750 | 1274-Lng-A-T | 88   | chr1:133355650-133355750 |
| chr1 | 133369150 | 133369250 | 1151-Lng-A-T | 7275 | chr1:133369150-133369250 |
| chr1 | 133382950 | 133383050 | 901-Lng-A-T  | 60   | chr1:133382950-133383050 |
| chr1 | 133589750 | 133589850 | 901-Lng-A-T  | 74   | chr1:133589750-133589850 |
| chr1 | 133611950 | 133612050 | 1065-Lng-C-T | 1336 | chr1:133611950-133612050 |
| chr1 | 133623450 | 133623550 | 1100-Lng-A-T | 175  | chr1:133623450-133623550 |
| chr1 | 133675950 | 133676050 | 1274-Lng-A-T | 166  | chr1:133675950-133676050 |
| chr1 | 133812450 | 133812550 | 1223-Lng-C-T | 48   | chr1:133812450-133812550 |
| chr1 | 134010750 | 134010850 | 1152-Lng-A-T | 121  | chr1:134010750-134010850 |
| chr1 | 134148050 | 134148150 | 1274-Lng-A-T | 54   | chr1:134148050-134148150 |
| chr1 | 134168750 | 134168850 | 1223-Lng-D-T | 51   | chr1:134168750-134168850 |
| chr1 | 134291950 | 134292050 | 1065-Lng-A-T | 36   | chr1:134291950-134292050 |
| chr1 | 134343050 | 134343150 | 1072-Lng-A-T | 142  | chr1:134343050-134343150 |
| chr1 | 134383450 | 134383550 | 1188-Lng-A-T | 35   | chr1:134383450-134383550 |
| chr1 | 134416150 | 134416250 | 1072-Lng-A-T | 118  | chr1:134416150-134416250 |
| chr1 | 134726550 | 134726650 | 1152-Lng-A-T | 294  | chr1:134726550-134726650 |
| chr1 | 134884150 | 134884250 | 1274-Lng-A-T | 173  | chr1:134884150-134884250 |
| chr1 | 135070950 | 135071050 | 901-Lng-D-T  | 1020 | chr1:135070950-135071050 |

**Table S2: SB Insertion regions**

|      |           |           |              |      |                          |
|------|-----------|-----------|--------------|------|--------------------------|
| chr1 | 135311150 | 135311250 | 1167-Lng-A-T | 109  | chr1:135311150-135311250 |
| chr1 | 135327850 | 135327950 | 1004-Lng-A-T | 72   | chr1:135327850-135327950 |
| chr1 | 135570350 | 135570450 | 1090-Lng-A-T | 83   | chr1:135570350-135570450 |
| chr1 | 135858050 | 135858150 | 1223-Lng-C-T | 45   | chr1:135858050-135858150 |
| chr1 | 136078050 | 136078150 | 1090-Lng-A-T | 60   | chr1:136078050-136078150 |
| chr1 | 136352850 | 136352950 | 1100-Lng-A-T | 52   | chr1:136352850-136352950 |
| chr1 | 136459950 | 136460050 | 1100-Lng-A-T | 134  | chr1:136459950-136460050 |
| chr1 | 136500250 | 136500350 | 1223-Lng-D-T | 51   | chr1:136500250-136500350 |
| chr1 | 136506050 | 136506150 | 1188-Lng-A-T | 60   | chr1:136506050-136506150 |
| chr1 | 136530050 | 136530150 | 1065-Lng-A-T | 428  | chr1:136530050-136530150 |
| chr1 | 136532150 | 136532250 | 1065-Lng-B-T | 46   | chr1:136532150-136532250 |
| chr1 | 136710150 | 136710250 | 1223-Lng-A-T | 81   | chr1:136710150-136710250 |
| chr1 | 136723350 | 136723450 | 1151-Lng-A-T | 242  | chr1:136723350-136723450 |
| chr1 | 136723850 | 136723950 | 1188-Lng-A-T | 115  | chr1:136723850-136723950 |
| chr1 | 136852650 | 136852750 | 1188-Lng-A-T | 66   | chr1:136852650-136852750 |
| chr1 | 137099350 | 137099450 | 1188-Lng-A-T | 325  | chr1:137099350-137099450 |
| chr1 | 137153950 | 137154050 | 1188-Lng-A-T | 213  | chr1:137153950-137154050 |
| chr1 | 137154550 | 137154650 | 1100-Lng-A-T | 74   | chr1:137154550-137154650 |
| chr1 | 137282150 | 137282250 | 901-Lng-A-T  | 99   | chr1:137282150-137282250 |
| chr1 | 137359550 | 137359650 | 901-Lng-C-T  | 58   | chr1:137359550-137359650 |
| chr1 | 137383350 | 137383450 | 1072-Lng-A-T | 71   | chr1:137383350-137383450 |
| chr1 | 137455750 | 137455850 | 1072-Lng-A-T | 72   | chr1:137455750-137455850 |
| chr1 | 137819750 | 137819850 | 1090-Lng-A-T | 57   | chr1:137819750-137819850 |
| chr1 | 138060850 | 138060950 | 901-Lng-C-T  | 58   | chr1:138060850-138060950 |
| chr1 | 138107350 | 138107450 | 1274-Lng-A-T | 166  | chr1:138107350-138107450 |
| chr1 | 138108750 | 138108850 | 901-Lng-C-T  | 32   | chr1:138108750-138108850 |
| chr1 | 138224250 | 138224350 | 901-Lng-A-T  | 186  | chr1:138224250-138224350 |
| chr1 | 138504050 | 138504150 | 1090-Lng-A-T | 84   | chr1:138504050-138504150 |
| chr1 | 138523250 | 138523350 | 1223-Lng-A-T | 55   | chr1:138523250-138523350 |
| chr1 | 138523950 | 138524050 | 901-Lng-A-T  | 141  | chr1:138523950-138524050 |
| chr1 | 139128750 | 139128850 | 1188-Lng-A-T | 43   | chr1:139128750-139128850 |
| chr1 | 139249250 | 139249350 | 901-Lng-D-T  | 417  | chr1:139249250-139249350 |
| chr1 | 139601150 | 139601250 | 1065-Lng-B-T | 51   | chr1:139601150-139601250 |
| chr1 | 139795750 | 139795850 | 901-Lng-A-T  | 104  | chr1:139795750-139795850 |
| chr1 | 140170350 | 140170450 | 901-Lng-C-T  | 31   | chr1:140170350-140170450 |
| chr1 | 140191850 | 140191950 | 1151-Lng-A-T | 183  | chr1:140191850-140191950 |
| chr1 | 140378950 | 140379050 | 901-Lng-C-T  | 43   | chr1:140378950-140379050 |
| chr1 | 140400950 | 140401050 | 1223-Lng-D-T | 40   | chr1:140400950-140401050 |
| chr1 | 140435350 | 140435450 | 1223-Lng-B-T | 37   | chr1:140435350-140435450 |
| chr1 | 140475250 | 140475350 | 1274-Lng-A-T | 142  | chr1:140475250-140475350 |
| chr1 | 140487950 | 140488050 | 1072-Lng-A-T | 95   | chr1:140487950-140488050 |
| chr1 | 140796250 | 140796350 | 1223-Lng-A-T | 53   | chr1:140796250-140796350 |
| chr1 | 140818250 | 140818350 | 901-Lng-C-T  | 95   | chr1:140818250-140818350 |
| chr1 | 140832250 | 140832350 | 1090-Lng-B-T | 1173 | chr1:140832250-140832350 |
| chr1 | 140886950 | 140887050 | 1274-Lng-A-T | 249  | chr1:140886950-140887050 |
| chr1 | 140888950 | 140889050 | 901-Lng-C-T  | 163  | chr1:140888950-140889050 |

**Table S2: SB Insertion regions**

|      |           |           |              |     |                          |
|------|-----------|-----------|--------------|-----|--------------------------|
| chr1 | 140897050 | 140897150 | 1072-Lng-A-T | 55  | chr1:140897050-140897150 |
| chr1 | 140947050 | 140947150 | 1274-Lng-A-T | 57  | chr1:140947050-140947150 |
| chr1 | 140947150 | 140947250 | 1072-Lng-A-T | 61  | chr1:140947150-140947250 |
| chr1 | 140955750 | 140955850 | 1152-Lng-A-T | 69  | chr1:140955750-140955850 |
| chr1 | 141004750 | 141004850 | 1274-Lng-A-T | 90  | chr1:141004750-141004850 |
| chr1 | 141334950 | 141335050 | 1072-Lng-A-T | 197 | chr1:141334950-141335050 |
| chr1 | 141374150 | 141374250 | 1223-Lng-D-T | 58  | chr1:141374150-141374250 |
| chr1 | 141977250 | 141977350 | 901-Lng-A-T  | 73  | chr1:141977250-141977350 |
| chr1 | 142233650 | 142233750 | 1004-Lng-A-T | 80  | chr1:142233650-142233750 |
| chr1 | 142297950 | 142298050 | 1152-Lng-A-T | 54  | chr1:142297950-142298050 |
| chr1 | 142316950 | 142317050 | 1223-Lng-B-T | 37  | chr1:142316950-142317050 |
| chr1 | 142354050 | 142354150 | 1004-Lng-A-T | 93  | chr1:142354050-142354150 |
| chr1 | 142381350 | 142381450 | 1274-Lng-A-T | 88  | chr1:142381350-142381450 |
| chr1 | 142385750 | 142385850 | 1274-Lng-A-T | 69  | chr1:142385750-142385850 |
| chr1 | 142481150 | 142481250 | 901-Lng-A-T  | 58  | chr1:142481150-142481250 |
| chr1 | 142711950 | 142712050 | 901-Lng-A-T  | 82  | chr1:142711950-142712050 |
| chr1 | 142786250 | 142786350 | 1188-Lng-A-T | 43  | chr1:142786250-142786350 |
| chr1 | 142948650 | 142948750 | 901-Lng-C-T  | 81  | chr1:142948650-142948750 |
| chr1 | 142997150 | 142997250 | 1065-Lng-C-T | 63  | chr1:142997150-142997250 |
| chr1 | 143335250 | 143335350 | 1152-Lng-A-T | 41  | chr1:143335250-143335350 |
| chr1 | 143367450 | 143367550 | 1004-Lng-A-T | 126 | chr1:143367450-143367550 |
| chr1 | 143367450 | 143367550 | 1004-Lng-A-T | 71  | chr1:143367450-143367550 |
| chr1 | 143633250 | 143633350 | 1152-Lng-A-T | 41  | chr1:143633250-143633350 |
| chr1 | 143676450 | 143676550 | 1065-Lng-B-T | 71  | chr1:143676450-143676550 |
| chr1 | 143682950 | 143683050 | 1065-Lng-C-T | 97  | chr1:143682950-143683050 |
| chr1 | 143683250 | 143683350 | 1065-Lng-C-T | 69  | chr1:143683250-143683350 |
| chr1 | 143710650 | 143710750 | 1274-Lng-A-T | 62  | chr1:143710650-143710750 |
| chr1 | 143844850 | 143844950 | 901-Lng-C-T  | 134 | chr1:143844850-143844950 |
| chr1 | 143851850 | 143851950 | 1072-Lng-A-T | 190 | chr1:143851850-143851950 |
| chr1 | 143956650 | 143956750 | 1090-Lng-B-T | 103 | chr1:143956650-143956750 |
| chr1 | 144029050 | 144029150 | 1090-Lng-A-T | 46  | chr1:144029050-144029150 |
| chr1 | 144107850 | 144107950 | 901-Lng-A-T  | 518 | chr1:144107850-144107950 |
| chr1 | 144464250 | 144464350 | 1152-Lng-A-T | 44  | chr1:144464250-144464350 |
| chr1 | 144490950 | 144491050 | 1152-Lng-A-T | 216 | chr1:144490950-144491050 |
| chr1 | 144604350 | 144604450 | 1223-Lng-A-T | 182 | chr1:144604350-144604450 |
| chr1 | 144614350 | 144614450 | 1152-Lng-A-T | 75  | chr1:144614350-144614450 |
| chr1 | 144627250 | 144627350 | 1090-Lng-A-T | 51  | chr1:144627250-144627350 |
| chr1 | 144657850 | 144657950 | 1065-Lng-B-T | 713 | chr1:144657850-144657950 |
| chr1 | 144731350 | 144731450 | 1004-Lng-A-T | 65  | chr1:144731350-144731450 |
| chr1 | 144823150 | 144823250 | 1004-Lng-A-T | 62  | chr1:144823150-144823250 |
| chr1 | 145250350 | 145250450 | 901-Lng-C-T  | 75  | chr1:145250350-145250450 |
| chr1 | 145494750 | 145494850 | 1151-Lng-A-T | 729 | chr1:145494750-145494850 |
| chr1 | 145510650 | 145510750 | 1100-Lng-A-T | 55  | chr1:145510650-145510750 |
| chr1 | 145514250 | 145514350 | 1274-Lng-A-T | 162 | chr1:145514250-145514350 |
| chr1 | 145524750 | 145524850 | 1223-Lng-D-T | 42  | chr1:145524750-145524850 |
| chr1 | 145604950 | 145605050 | 1188-Lng-A-T | 206 | chr1:145604950-145605050 |

**Table S2: SB Insertion regions**

|      |           |           |              |     |                          |
|------|-----------|-----------|--------------|-----|--------------------------|
| chr1 | 145616650 | 145616750 | 1188-Lng-A-T | 201 | chr1:145616650-145616750 |
| chr1 | 145886850 | 145886950 | 1004-Lng-A-T | 91  | chr1:145886850-145886950 |
| chr1 | 146014150 | 146014250 | 1151-Lng-A-T | 60  | chr1:146014150-146014250 |
| chr1 | 146021650 | 146021750 | 1072-Lng-A-T | 54  | chr1:146021650-146021750 |
| chr1 | 146023750 | 146023850 | 1223-Lng-A-T | 234 | chr1:146023750-146023850 |
| chr1 | 146120550 | 146120650 | 1152-Lng-A-T | 100 | chr1:146120550-146120650 |
| chr1 | 146342650 | 146342750 | 1223-Lng-A-T | 141 | chr1:146342650-146342750 |
| chr1 | 146374950 | 146375050 | 1152-Lng-A-T | 71  | chr1:146374950-146375050 |
| chr1 | 146506750 | 146506850 | 901-Lng-C-T  | 34  | chr1:146506750-146506850 |
| chr1 | 146796650 | 146796750 | 1065-Lng-A-T | 52  | chr1:146796650-146796750 |
| chr1 | 146837950 | 146838050 | 1065-Lng-A-T | 63  | chr1:146837950-146838050 |
| chr1 | 146871750 | 146871850 | 1223-Lng-B-T | 38  | chr1:146871750-146871850 |
| chr1 | 147035250 | 147035350 | 1065-Lng-B-T | 54  | chr1:147035250-147035350 |
| chr1 | 147128750 | 147128850 | 1090-Lng-A-T | 69  | chr1:147128750-147128850 |
| chr1 | 147173950 | 147174050 | 1072-Lng-A-T | 61  | chr1:147173950-147174050 |
| chr1 | 147227550 | 147227650 | 1223-Lng-B-T | 34  | chr1:147227550-147227650 |
| chr1 | 147283550 | 147283650 | 901-Lng-A-T  | 112 | chr1:147283550-147283650 |
| chr1 | 147289750 | 147289850 | 901-Lng-C-T  | 31  | chr1:147289750-147289850 |
| chr1 | 147747850 | 147747950 | 1065-Lng-A-T | 88  | chr1:147747850-147747950 |
| chr1 | 147753050 | 147753150 | 1152-Lng-A-T | 138 | chr1:147753050-147753150 |
| chr1 | 147956750 | 147956850 | 1223-Lng-C-T | 55  | chr1:147956750-147956850 |
| chr1 | 148062550 | 148062650 | 1065-Lng-B-T | 317 | chr1:148062550-148062650 |
| chr1 | 148105550 | 148105650 | 901-Lng-C-T  | 214 | chr1:148105550-148105650 |
| chr1 | 148159950 | 148160050 | 1274-Lng-A-T | 122 | chr1:148159950-148160050 |
| chr1 | 148228350 | 148228450 | 1065-Lng-C-T | 66  | chr1:148228350-148228450 |
| chr1 | 148261750 | 148261850 | 1065-Lng-C-T | 127 | chr1:148261750-148261850 |
| chr1 | 148339350 | 148339450 | 901-Lng-B-T  | 38  | chr1:148339350-148339450 |
| chr1 | 148586850 | 148586950 | 1223-Lng-C-T | 52  | chr1:148586850-148586950 |
| chr1 | 148594150 | 148594250 | 1072-Lng-A-T | 50  | chr1:148594150-148594250 |
| chr1 | 148895650 | 148895750 | 1004-Lng-A-T | 51  | chr1:148895650-148895750 |
| chr1 | 148906750 | 148906850 | 1188-Lng-A-T | 81  | chr1:148906750-148906850 |
| chr1 | 148936350 | 148936450 | 1152-Lng-A-T | 105 | chr1:148936350-148936450 |
| chr1 | 149176250 | 149176350 | 1223-Lng-B-T | 39  | chr1:149176250-149176350 |
| chr1 | 149272850 | 149272950 | 1274-Lng-A-T | 99  | chr1:149272850-149272950 |
| chr1 | 149803150 | 149803250 | 1004-Lng-A-T | 106 | chr1:149803150-149803250 |
| chr1 | 150234150 | 150234250 | 1004-Lng-A-T | 94  | chr1:150234150-150234250 |
| chr1 | 150277550 | 150277650 | 1223-Lng-C-T | 55  | chr1:150277550-150277650 |
| chr1 | 150322050 | 150322150 | 901-Lng-A-T  | 84  | chr1:150322050-150322150 |
| chr1 | 150370450 | 150370550 | 1100-Lng-A-T | 52  | chr1:150370450-150370550 |
| chr1 | 150538150 | 150538250 | 1100-Lng-A-T | 101 | chr1:150538150-150538250 |
| chr1 | 150553850 | 150553950 | 1072-Lng-A-T | 63  | chr1:150553850-150553950 |
| chr1 | 150862050 | 150862150 | 1004-Lng-A-T | 569 | chr1:150862050-150862150 |
| chr1 | 151062650 | 151062750 | 1065-Lng-B-T | 63  | chr1:151062650-151062750 |
| chr1 | 151158750 | 151158850 | 1072-Lng-A-T | 181 | chr1:151158750-151158850 |
| chr1 | 151168950 | 151169050 | 1167-Lng-A-T | 87  | chr1:151168950-151169050 |
| chr1 | 151196150 | 151196250 | 1274-Lng-A-T | 196 | chr1:151196150-151196250 |

**Table S2: SB Insertion regions**

|      |           |           |              |     |                          |
|------|-----------|-----------|--------------|-----|--------------------------|
| chr1 | 151323550 | 151323650 | 901-Lng-C-T  | 76  | chr1:151323550-151323650 |
| chr1 | 151507350 | 151507450 | 1167-Lng-A-T | 54  | chr1:151507350-151507450 |
| chr1 | 151664050 | 151664150 | 1274-Lng-A-T | 51  | chr1:151664050-151664150 |
| chr1 | 151693550 | 151693650 | 1223-Lng-B-T | 44  | chr1:151693550-151693650 |
| chr1 | 151760750 | 151760850 | 1151-Lng-A-T | 390 | chr1:151760750-151760850 |
| chr1 | 151933350 | 151933450 | 1065-Lng-B-T | 41  | chr1:151933350-151933450 |
| chr1 | 152292750 | 152292850 | 1072-Lng-A-T | 252 | chr1:152292750-152292850 |
| chr1 | 152306750 | 152306850 | 1274-Lng-A-T | 125 | chr1:152306750-152306850 |
| chr1 | 152508450 | 152508550 | 1223-Lng-A-T | 69  | chr1:152508450-152508550 |
| chr1 | 152522050 | 152522150 | 1100-Lng-A-T | 52  | chr1:152522050-152522150 |
| chr1 | 152569350 | 152569450 | 1072-Lng-A-T | 152 | chr1:152569350-152569450 |
| chr1 | 152723850 | 152723950 | 1065-Lng-A-T | 89  | chr1:152723850-152723950 |
| chr1 | 153035650 | 153035750 | 1065-Lng-A-T | 95  | chr1:153035650-153035750 |
| chr1 | 153193050 | 153193150 | 1223-Lng-C-T | 45  | chr1:153193050-153193150 |
| chr1 | 153218650 | 153218750 | 1065-Lng-A-T | 412 | chr1:153218650-153218750 |
| chr1 | 153245950 | 153246050 | 1151-Lng-A-T | 318 | chr1:153245950-153246050 |
| chr1 | 153257250 | 153257350 | 901-Lng-C-T  | 84  | chr1:153257250-153257350 |
| chr1 | 153269450 | 153269550 | 1167-Lng-A-T | 55  | chr1:153269450-153269550 |
| chr1 | 153295850 | 153295950 | 1152-Lng-A-T | 129 | chr1:153295850-153295950 |
| chr1 | 153314950 | 153315050 | 1152-Lng-A-T | 93  | chr1:153314950-153315050 |
| chr1 | 153457150 | 153457250 | 1223-Lng-D-T | 61  | chr1:153457150-153457250 |
| chr1 | 153475850 | 153475950 | 1188-Lng-A-T | 40  | chr1:153475850-153475950 |
| chr1 | 153601750 | 153601850 | 1223-Lng-B-T | 46  | chr1:153601750-153601850 |
| chr1 | 153737350 | 153737450 | 1065-Lng-C-T | 62  | chr1:153737350-153737450 |
| chr1 | 154236250 | 154236350 | 1090-Lng-B-T | 253 | chr1:154236250-154236350 |
| chr1 | 154691050 | 154691150 | 1188-Lng-A-T | 46  | chr1:154691050-154691150 |
| chr1 | 154692050 | 154692150 | 1072-Lng-A-T | 164 | chr1:154692050-154692150 |
| chr1 | 154722050 | 154722150 | 1004-Lng-A-T | 61  | chr1:154722050-154722150 |
| chr1 | 154767850 | 154767950 | 1065-Lng-C-T | 935 | chr1:154767850-154767950 |
| chr1 | 154840250 | 154840350 | 1152-Lng-A-T | 251 | chr1:154840250-154840350 |
| chr1 | 154972050 | 154972150 | 1223-Lng-B-T | 46  | chr1:154972050-154972150 |
| chr1 | 155120050 | 155120150 | 1065-Lng-B-T | 59  | chr1:155120050-155120150 |
| chr1 | 155128750 | 155128850 | 1065-Lng-B-T | 56  | chr1:155128750-155128850 |
| chr1 | 155156350 | 155156450 | 1152-Lng-A-T | 48  | chr1:155156350-155156450 |
| chr1 | 155312550 | 155312650 | 1167-Lng-A-T | 121 | chr1:155312550-155312650 |
| chr1 | 155319450 | 155319550 | 1152-Lng-A-T | 60  | chr1:155319450-155319550 |
| chr1 | 155323150 | 155323250 | 1274-Lng-A-T | 96  | chr1:155323150-155323250 |
| chr1 | 155543250 | 155543350 | 1274-Lng-A-T | 53  | chr1:155543250-155543350 |
| chr1 | 155559150 | 155559250 | 1065-Lng-A-T | 83  | chr1:155559150-155559250 |
| chr1 | 155685050 | 155685150 | 1223-Lng-B-T | 40  | chr1:155685050-155685150 |
| chr1 | 155694650 | 155694750 | 1065-Lng-C-T | 85  | chr1:155694650-155694750 |
| chr1 | 155783850 | 155783950 | 1065-Lng-B-T | 40  | chr1:155783850-155783950 |
| chr1 | 155991150 | 155991250 | 1090-Lng-B-T | 859 | chr1:155991150-155991250 |
| chr1 | 156261050 | 156261150 | 1004-Lng-A-T | 62  | chr1:156261050-156261150 |
| chr1 | 156516550 | 156516650 | 1167-Lng-A-T | 83  | chr1:156516550-156516650 |
| chr1 | 156599850 | 156599950 | 1223-Lng-D-T | 43  | chr1:156599850-156599950 |

**Table S2: SB Insertion regions**

|      |           |           |              |      |                          |
|------|-----------|-----------|--------------|------|--------------------------|
| chr1 | 156887550 | 156887650 | 1072-Lng-A-T | 48   | chr1:156887550-156887650 |
| chr1 | 156933750 | 156933850 | 1151-Lng-A-T | 141  | chr1:156933750-156933850 |
| chr1 | 157015550 | 157015650 | 1065-Lng-B-T | 55   | chr1:157015550-157015650 |
| chr1 | 157021550 | 157021650 | 1151-Lng-A-T | 57   | chr1:157021550-157021650 |
| chr1 | 157155750 | 157155850 | 1072-Lng-A-T | 103  | chr1:157155750-157155850 |
| chr1 | 157159350 | 157159450 | 1100-Lng-A-T | 55   | chr1:157159350-157159450 |
| chr1 | 157178150 | 157178250 | 1223-Lng-D-T | 50   | chr1:157178150-157178250 |
| chr1 | 157403150 | 157403250 | 1090-Lng-A-T | 76   | chr1:157403150-157403250 |
| chr1 | 157406650 | 157406750 | 1100-Lng-A-T | 94   | chr1:157406650-157406750 |
| chr1 | 157682850 | 157682950 | 1100-Lng-A-T | 80   | chr1:157682850-157682950 |
| chr1 | 157700850 | 157700950 | 1004-Lng-A-T | 49   | chr1:157700850-157700950 |
| chr1 | 157726750 | 157726850 | 1167-Lng-A-T | 310  | chr1:157726750-157726850 |
| chr1 | 157735350 | 157735450 | 901-Lng-A-T  | 67   | chr1:157735350-157735450 |
| chr1 | 157735650 | 157735750 | 1065-Lng-B-T | 61   | chr1:157735650-157735750 |
| chr1 | 157894150 | 157894250 | 1274-Lng-A-T | 49   | chr1:157894150-157894250 |
| chr1 | 158189650 | 158189750 | 846-Lng-A-T  | 74   | chr1:158189650-158189750 |
| chr1 | 158356150 | 158356250 | 1223-Lng-B-T | 76   | chr1:158356150-158356250 |
| chr1 | 158375250 | 158375350 | 1065-Lng-B-T | 68   | chr1:158375250-158375350 |
| chr1 | 158377450 | 158377550 | 1274-Lng-A-T | 120  | chr1:158377450-158377550 |
| chr1 | 158502750 | 158502850 | 1274-Lng-A-T | 59   | chr1:158502750-158502850 |
| chr1 | 158503850 | 158503950 | 1223-Lng-C-T | 55   | chr1:158503850-158503950 |
| chr1 | 158530050 | 158530150 | 1223-Lng-A-T | 66   | chr1:158530050-158530150 |
| chr1 | 158530050 | 158530150 | 1188-Lng-A-T | 49   | chr1:158530050-158530150 |
| chr1 | 158534450 | 158534550 | 1065-Lng-B-T | 44   | chr1:158534450-158534550 |
| chr1 | 158538250 | 158538350 | 1167-Lng-A-T | 8591 | chr1:158538250-158538350 |
| chr1 | 158551150 | 158551250 | 901-Lng-D-T  | 71   | chr1:158551150-158551250 |
| chr1 | 158615150 | 158615250 | 1223-Lng-C-T | 65   | chr1:158615150-158615250 |
| chr1 | 158645550 | 158645650 | 1274-Lng-A-T | 179  | chr1:158645550-158645650 |
| chr1 | 159113350 | 159113450 | 1065-Lng-B-T | 50   | chr1:159113350-159113450 |
| chr1 | 159204450 | 159204550 | 1167-Lng-A-T | 57   | chr1:159204450-159204550 |
| chr1 | 159310650 | 159310750 | 1152-Lng-A-T | 74   | chr1:159310650-159310750 |
| chr1 | 159708650 | 159708750 | 1065-Lng-B-T | 64   | chr1:159708650-159708750 |
| chr1 | 159730850 | 159730950 | 1065-Lng-C-T | 61   | chr1:159730850-159730950 |
| chr1 | 159805950 | 159806050 | 1065-Lng-A-T | 80   | chr1:159805950-159806050 |
| chr1 | 159816350 | 159816450 | 1151-Lng-A-T | 85   | chr1:159816350-159816450 |
| chr1 | 159816850 | 159816950 | 1065-Lng-B-T | 391  | chr1:159816850-159816950 |
| chr1 | 160090250 | 160090350 | 846-Lng-A-T  | 138  | chr1:160090250-160090350 |
| chr1 | 160789850 | 160789950 | 901-Lng-A-T  | 89   | chr1:160789850-160789950 |
| chr1 | 161263850 | 161263950 | 1065-Lng-B-T | 73   | chr1:161263850-161263950 |
| chr1 | 161271350 | 161271450 | 1065-Lng-A-T | 73   | chr1:161271350-161271450 |
| chr1 | 161279750 | 161279850 | 901-Lng-C-T  | 34   | chr1:161279750-161279850 |
| chr1 | 161392150 | 161392250 | 1223-Lng-B-T | 70   | chr1:161392150-161392250 |
| chr1 | 161411850 | 161411950 | 901-Lng-A-T  | 496  | chr1:161411850-161411950 |
| chr1 | 161531150 | 161531250 | 1274-Lng-A-T | 54   | chr1:161531150-161531250 |
| chr1 | 161693550 | 161693650 | 1090-Lng-A-T | 94   | chr1:161693550-161693650 |
| chr1 | 161774150 | 161774250 | 1004-Lng-A-T | 71   | chr1:161774150-161774250 |

**Table S2: SB Insertion regions**

|      |           |           |              |      |                          |
|------|-----------|-----------|--------------|------|--------------------------|
| chr1 | 161948450 | 161948550 | 1065-Lng-A-T | 38   | chr1:161948450-161948550 |
| chr1 | 161958650 | 161958750 | 901-Lng-B-T  | 73   | chr1:161958650-161958750 |
| chr1 | 161983950 | 161984050 | 1223-Lng-D-T | 145  | chr1:161983950-161984050 |
| chr1 | 162156450 | 162156550 | 1100-Lng-B-T | 66   | chr1:162156450-162156550 |
| chr1 | 162189550 | 162189650 | 1274-Lng-A-T | 52   | chr1:162189550-162189650 |
| chr1 | 162635950 | 162636050 | 901-Lng-A-T  | 111  | chr1:162635950-162636050 |
| chr1 | 162680350 | 162680450 | 1065-Lng-A-T | 42   | chr1:162680350-162680450 |
| chr1 | 162821450 | 162821550 | 1065-Lng-B-T | 56   | chr1:162821450-162821550 |
| chr1 | 162849750 | 162849850 | 1151-Lng-A-T | 252  | chr1:162849750-162849850 |
| chr1 | 162853450 | 162853550 | 1100-Lng-A-T | 56   | chr1:162853450-162853550 |
| chr1 | 162871450 | 162871550 | 1065-Lng-A-T | 102  | chr1:162871450-162871550 |
| chr1 | 162967950 | 162968050 | 901-Lng-A-T  | 89   | chr1:162967950-162968050 |
| chr1 | 163165950 | 163166050 | 1188-Lng-A-T | 75   | chr1:163165950-163166050 |
| chr1 | 163166650 | 163166750 | 1090-Lng-A-T | 66   | chr1:163166650-163166750 |
| chr1 | 163318050 | 163318150 | 901-Lng-B-T  | 124  | chr1:163318050-163318150 |
| chr1 | 163427850 | 163427950 | 1065-Lng-B-T | 59   | chr1:163427850-163427950 |
| chr1 | 163493250 | 163493350 | 1223-Lng-B-T | 44   | chr1:163493250-163493350 |
| chr1 | 163758750 | 163758850 | 1100-Lng-A-T | 156  | chr1:163758750-163758850 |
| chr1 | 163771350 | 163771450 | 1072-Lng-A-T | 237  | chr1:163771350-163771450 |
| chr1 | 163788750 | 163788850 | 1151-Lng-A-T | 59   | chr1:163788750-163788850 |
| chr1 | 163792450 | 163792550 | 1223-Lng-D-T | 104  | chr1:163792450-163792550 |
| chr1 | 163792650 | 163792750 | 1151-Lng-A-T | 187  | chr1:163792650-163792750 |
| chr1 | 164122850 | 164122950 | 1151-Lng-A-T | 65   | chr1:164122850-164122950 |
| chr1 | 164259750 | 164259850 | 1065-Lng-A-T | 88   | chr1:164259750-164259850 |
| chr1 | 164260050 | 164260150 | 1072-Lng-A-T | 179  | chr1:164260050-164260150 |
| chr1 | 164306250 | 164306350 | 1100-Lng-B-T | 89   | chr1:164306250-164306350 |
| chr1 | 164623250 | 164623350 | 1274-Lng-A-T | 67   | chr1:164623250-164623350 |
| chr1 | 164633250 | 164633350 | 1065-Lng-B-T | 57   | chr1:164633250-164633350 |
| chr1 | 164637650 | 164637750 | 1065-Lng-A-T | 52   | chr1:164637650-164637750 |
| chr1 | 164665350 | 164665450 | 1065-Lng-B-T | 539  | chr1:164665350-164665450 |
| chr1 | 164708350 | 164708450 | 1223-Lng-D-T | 77   | chr1:164708350-164708450 |
| chr1 | 164851550 | 164851650 | 846-Lng-A-T  | 54   | chr1:164851550-164851650 |
| chr1 | 164888150 | 164888250 | 1065-Lng-A-T | 260  | chr1:164888150-164888250 |
| chr1 | 164915750 | 164915850 | 1004-Lng-A-T | 64   | chr1:164915750-164915850 |
| chr1 | 165057650 | 165057750 | 1223-Lng-B-T | 59   | chr1:165057650-165057750 |
| chr1 | 165711750 | 165711850 | 1223-Lng-A-T | 179  | chr1:165711750-165711850 |
| chr1 | 165804150 | 165804250 | 1065-Lng-C-T | 88   | chr1:165804150-165804250 |
| chr1 | 165815650 | 165815750 | 1223-Lng-B-T | 44   | chr1:165815650-165815750 |
| chr1 | 165817850 | 165817950 | 1090-Lng-A-T | 44   | chr1:165817850-165817950 |
| chr1 | 165884950 | 165885050 | 901-Lng-C-T  | 1490 | chr1:165884950-165885050 |
| chr1 | 165884950 | 165885050 | 1223-Lng-C-T | 48   | chr1:165884950-165885050 |
| chr1 | 165887150 | 165887250 | 1065-Lng-A-T | 134  | chr1:165887150-165887250 |
| chr1 | 166101350 | 166101450 | 1274-Lng-A-T | 89   | chr1:166101350-166101450 |
| chr1 | 166304950 | 166305050 | 901-Lng-C-T  | 95   | chr1:166304950-166305050 |
| chr1 | 166322850 | 166322950 | 901-Lng-A-T  | 67   | chr1:166322850-166322950 |
| chr1 | 166404450 | 166404550 | 1065-Lng-B-T | 40   | chr1:166404450-166404550 |

**Table S2: SB Insertion regions**

|      |           |           |              |      |                          |
|------|-----------|-----------|--------------|------|--------------------------|
| chr1 | 166411950 | 166412050 | 1223-Lng-D-T | 76   | chr1:166411950-166412050 |
| chr1 | 166450850 | 166450950 | 901-Lng-C-T  | 37   | chr1:166450850-166450950 |
| chr1 | 166523150 | 166523250 | 1100-Lng-A-T | 144  | chr1:166523150-166523250 |
| chr1 | 166732250 | 166732350 | 1004-Lng-A-T | 62   | chr1:166732250-166732350 |
| chr1 | 167145950 | 167146050 | 1072-Lng-A-T | 104  | chr1:167145950-167146050 |
| chr1 | 167292350 | 167292450 | 901-Lng-C-T  | 35   | chr1:167292350-167292450 |
| chr1 | 167360550 | 167360650 | 1100-Lng-A-T | 120  | chr1:167360550-167360650 |
| chr1 | 167399850 | 167399950 | 1167-Lng-A-T | 74   | chr1:167399850-167399950 |
| chr1 | 167403250 | 167403350 | 1072-Lng-A-T | 93   | chr1:167403250-167403350 |
| chr1 | 167403750 | 167403850 | 1223-Lng-C-T | 76   | chr1:167403750-167403850 |
| chr1 | 167411350 | 167411450 | 846-Lng-A-T  | 194  | chr1:167411350-167411450 |
| chr1 | 167648950 | 167649050 | 1065-Lng-A-T | 102  | chr1:167648950-167649050 |
| chr1 | 167709650 | 167709750 | 1223-Lng-B-T | 37   | chr1:167709650-167709750 |
| chr1 | 167865050 | 167865150 | 1152-Lng-A-T | 65   | chr1:167865050-167865150 |
| chr1 | 167920550 | 167920650 | 1072-Lng-A-T | 72   | chr1:167920550-167920650 |
| chr1 | 167922450 | 167922550 | 1072-Lng-A-T | 1788 | chr1:167922450-167922550 |
| chr1 | 167922650 | 167922750 | 1072-Lng-A-T | 62   | chr1:167922650-167922750 |
| chr1 | 167923350 | 167923450 | 901-Lng-B-T  | 120  | chr1:167923350-167923450 |
| chr1 | 167927750 | 167927850 | 1072-Lng-A-T | 62   | chr1:167927750-167927850 |
| chr1 | 168257950 | 168258050 | 901-Lng-C-T  | 45   | chr1:168257950-168258050 |
| chr1 | 168308550 | 168308650 | 1274-Lng-A-T | 126  | chr1:168308550-168308650 |
| chr1 | 169248550 | 169248650 | 1065-Lng-C-T | 93   | chr1:169248550-169248650 |
| chr1 | 169593150 | 169593250 | 901-Lng-A-T  | 286  | chr1:169593150-169593250 |
| chr1 | 169595550 | 169595650 | 901-Lng-B-T  | 50   | chr1:169595550-169595650 |
| chr1 | 169697250 | 169697350 | 1167-Lng-A-T | 98   | chr1:169697250-169697350 |
| chr1 | 170098350 | 170098450 | 1072-Lng-A-T | 154  | chr1:170098350-170098450 |
| chr1 | 170106650 | 170106750 | 1223-Lng-D-T | 41   | chr1:170106650-170106750 |
| chr1 | 170119250 | 170119350 | 1223-Lng-B-T | 64   | chr1:170119250-170119350 |
| chr1 | 170205550 | 170205650 | 1274-Lng-A-T | 60   | chr1:170205550-170205650 |
| chr1 | 170208550 | 170208650 | 901-Lng-A-T  | 65   | chr1:170208550-170208650 |
| chr1 | 170223450 | 170223550 | 901-Lng-D-T  | 379  | chr1:170223450-170223550 |
| chr1 | 170224150 | 170224250 | 1004-Lng-A-T | 121  | chr1:170224150-170224250 |
| chr1 | 170234550 | 170234650 | 901-Lng-A-T  | 61   | chr1:170234550-170234650 |
| chr1 | 170236350 | 170236450 | 901-Lng-C-T  | 87   | chr1:170236350-170236450 |
| chr1 | 170306850 | 170306950 | 1274-Lng-A-T | 68   | chr1:170306850-170306950 |
| chr1 | 170351550 | 170351650 | 901-Lng-D-T  | 210  | chr1:170351550-170351650 |
| chr1 | 170471750 | 170471850 | 1223-Lng-B-T | 146  | chr1:170471750-170471850 |
| chr1 | 171337150 | 171337250 | 1223-Lng-B-T | 59   | chr1:171337150-171337250 |
| chr1 | 171458550 | 171458650 | 1090-Lng-A-T | 558  | chr1:171458550-171458650 |
| chr1 | 171556450 | 171556550 | 1065-Lng-C-T | 61   | chr1:171556450-171556550 |
| chr1 | 171632750 | 171632850 | 1167-Lng-A-T | 57   | chr1:171632750-171632850 |
| chr1 | 171711050 | 171711150 | 1065-Lng-A-T | 71   | chr1:171711050-171711150 |
| chr1 | 171845850 | 171845950 | 1188-Lng-A-T | 330  | chr1:171845850-171845950 |
| chr1 | 172134450 | 172134550 | 1188-Lng-A-T | 62   | chr1:172134450-172134550 |
| chr1 | 172263650 | 172263750 | 1152-Lng-A-T | 56   | chr1:172263650-172263750 |
| chr1 | 172285950 | 172286050 | 1065-Lng-B-T | 40   | chr1:172285950-172286050 |



**Table S2: SB Insertion regions**

|      |           |           |              |     |                          |
|------|-----------|-----------|--------------|-----|--------------------------|
| chr1 | 172414650 | 172414750 | 1065-Lng-B-T | 56  | chr1:172414650-172414750 |
| chr1 | 172510550 | 172510650 | 901-Lng-D-T  | 217 | chr1:172510550-172510650 |
| chr1 | 172661350 | 172661450 | 1223-Lng-C-T | 51  | chr1:172661350-172661450 |
| chr1 | 172666250 | 172666350 | 1188-Lng-A-T | 41  | chr1:172666250-172666350 |
| chr1 | 172762750 | 172762850 | 901-Lng-A-T  | 56  | chr1:172762750-172762850 |
| chr1 | 172892650 | 172892750 | 1072-Lng-A-T | 64  | chr1:172892650-172892750 |
| chr1 | 172957250 | 172957350 | 901-Lng-C-T  | 44  | chr1:172957250-172957350 |
| chr1 | 173066850 | 173066950 | 1065-Lng-C-T | 77  | chr1:173066850-173066950 |
| chr1 | 173218850 | 173218950 | 901-Lng-D-T  | 74  | chr1:173218850-173218950 |
| chr1 | 173328950 | 173329050 | 901-Lng-C-T  | 101 | chr1:173328950-173329050 |
| chr1 | 173399350 | 173399450 | 846-Lng-A-T  | 97  | chr1:173399350-173399450 |
| chr1 | 173463550 | 173463650 | 1151-Lng-A-T | 80  | chr1:173463550-173463650 |
| chr1 | 174084850 | 174084950 | 1223-Lng-D-T | 47  | chr1:174084850-174084950 |
| chr1 | 174370250 | 174370350 | 901-Lng-D-T  | 280 | chr1:174370250-174370350 |
| chr1 | 174515450 | 174515550 | 1223-Lng-D-T | 68  | chr1:174515450-174515550 |
| chr1 | 174685950 | 174686050 | 1223-Lng-A-T | 79  | chr1:174685950-174686050 |
| chr1 | 174701650 | 174701750 | 901-Lng-A-T  | 533 | chr1:174701650-174701750 |
| chr1 | 175164650 | 175164750 | 1065-Lng-B-T | 108 | chr1:175164650-175164750 |
| chr1 | 175983750 | 175983850 | 1167-Lng-A-T | 114 | chr1:175983750-175983850 |
| chr1 | 176016650 | 176016750 | 1065-Lng-B-T | 52  | chr1:176016650-176016750 |
| chr1 | 176058450 | 176058550 | 1274-Lng-A-T | 79  | chr1:176058450-176058550 |
| chr1 | 176380750 | 176380850 | 1152-Lng-A-T | 99  | chr1:176380750-176380850 |
| chr1 | 176720050 | 176720150 | 901-Lng-A-T  | 60  | chr1:176720050-176720150 |
| chr1 | 176775450 | 176775550 | 901-Lng-C-T  | 59  | chr1:176775450-176775550 |
| chr1 | 176851450 | 176851550 | 1065-Lng-A-T | 45  | chr1:176851450-176851550 |
| chr1 | 177349650 | 177349750 | 1065-Lng-A-T | 146 | chr1:177349650-177349750 |
| chr1 | 177404750 | 177404850 | 1072-Lng-A-T | 48  | chr1:177404750-177404850 |
| chr1 | 177495150 | 177495250 | 1065-Lng-A-T | 63  | chr1:177495150-177495250 |
| chr1 | 177515150 | 177515250 | 901-Lng-B-T  | 42  | chr1:177515150-177515250 |
| chr1 | 177571950 | 177572050 | 1223-Lng-A-T | 881 | chr1:177571950-177572050 |
| chr1 | 177619250 | 177619350 | 901-Lng-A-T  | 99  | chr1:177619250-177619350 |
| chr1 | 177685150 | 177685250 | 1223-Lng-B-T | 194 | chr1:177685150-177685250 |
| chr1 | 177940550 | 177940650 | 1065-Lng-B-T | 53  | chr1:177940550-177940650 |
| chr1 | 177970250 | 177970350 | 901-Lng-C-T  | 52  | chr1:177970250-177970350 |
| chr1 | 178193050 | 178193150 | 1004-Lng-A-T | 54  | chr1:178193050-178193150 |
| chr1 | 178521150 | 178521250 | 1065-Lng-B-T | 84  | chr1:178521150-178521250 |
| chr1 | 178763450 | 178763550 | 1065-Lng-C-T | 67  | chr1:178763450-178763550 |
| chr1 | 178763550 | 178763650 | 901-Lng-C-T  | 29  | chr1:178763550-178763650 |
| chr1 | 178852050 | 178852150 | 1223-Lng-D-T | 70  | chr1:178852050-178852150 |
| chr1 | 178907450 | 178907550 | 901-Lng-D-T  | 59  | chr1:178907450-178907550 |
| chr1 | 178934650 | 178934750 | 1065-Lng-C-T | 67  | chr1:178934650-178934750 |
| chr1 | 178965750 | 178965850 | 1090-Lng-A-T | 105 | chr1:178965750-178965850 |
| chr1 | 178988350 | 178988450 | 1100-Lng-B-T | 171 | chr1:178988350-178988450 |
| chr1 | 179028950 | 179029050 | 1223-Lng-D-T | 50  | chr1:179028950-179029050 |
| chr1 | 179129750 | 179129850 | 901-Lng-D-T  | 188 | chr1:179129750-179129850 |
| chr1 | 179187050 | 179187150 | 1223-Lng-D-T | 93  | chr1:179187050-179187150 |

**Table S2: SB Insertion regions**

|      |           |           |              |      |                          |
|------|-----------|-----------|--------------|------|--------------------------|
| chr1 | 179378750 | 179378850 | 901-Lng-C-T  | 1457 | chr1:179378750-179378850 |
| chr1 | 179434950 | 179435050 | 1274-Lng-A-T | 138  | chr1:179434950-179435050 |
| chr1 | 179611150 | 179611250 | 901-Lng-A-T  | 60   | chr1:179611150-179611250 |
| chr1 | 179653350 | 179653450 | 1065-Lng-A-T | 38   | chr1:179653350-179653450 |
| chr1 | 179705450 | 179705550 | 1274-Lng-A-T | 56   | chr1:179705450-179705550 |
| chr1 | 179712750 | 179712850 | 1004-Lng-A-T | 100  | chr1:179712750-179712850 |
| chr1 | 179719150 | 179719250 | 1100-Lng-B-T | 50   | chr1:179719150-179719250 |
| chr1 | 179721150 | 179721250 | 1072-Lng-A-T | 73   | chr1:179721150-179721250 |
| chr1 | 180028350 | 180028450 | 901-Lng-C-T  | 28   | chr1:180028350-180028450 |
| chr1 | 180102950 | 180103050 | 1152-Lng-A-T | 57   | chr1:180102950-180103050 |
| chr1 | 180256050 | 180256150 | 1188-Lng-A-T | 40   | chr1:180256050-180256150 |
| chr1 | 180262750 | 180262850 | 1167-Lng-A-T | 103  | chr1:180262750-180262850 |
| chr1 | 180274250 | 180274350 | 1072-Lng-A-T | 78   | chr1:180274250-180274350 |
| chr1 | 180660150 | 180660250 | 901-Lng-B-T  | 82   | chr1:180660150-180660250 |
| chr1 | 180666150 | 180666250 | 1090-Lng-A-T | 63   | chr1:180666150-180666250 |
| chr1 | 180882250 | 180882350 | 1065-Lng-A-T | 56   | chr1:180882250-180882350 |
| chr1 | 181196450 | 181196550 | 901-Lng-C-T  | 30   | chr1:181196450-181196550 |
| chr1 | 181243850 | 181243950 | 1152-Lng-A-T | 86   | chr1:181243850-181243950 |
| chr1 | 181255250 | 181255350 | 1072-Lng-A-T | 96   | chr1:181255250-181255350 |
| chr1 | 181276550 | 181276650 | 1100-Lng-A-T | 92   | chr1:181276550-181276650 |
| chr1 | 181289750 | 181289850 | 901-Lng-C-T  | 41   | chr1:181289750-181289850 |
| chr1 | 181311650 | 181311750 | 901-Lng-D-T  | 39   | chr1:181311650-181311750 |
| chr1 | 181479350 | 181479450 | 1072-Lng-A-T | 52   | chr1:181479350-181479450 |
| chr1 | 181502450 | 181502550 | 1167-Lng-A-T | 65   | chr1:181502450-181502550 |
| chr1 | 181506350 | 181506450 | 1152-Lng-A-T | 363  | chr1:181506350-181506450 |
| chr1 | 181519050 | 181519150 | 1152-Lng-A-T | 68   | chr1:181519050-181519150 |
| chr1 | 181527350 | 181527450 | 1274-Lng-A-T | 151  | chr1:181527350-181527450 |
| chr1 | 181673750 | 181673850 | 1188-Lng-A-T | 80   | chr1:181673750-181673850 |
| chr1 | 181710350 | 181710450 | 901-Lng-B-T  | 186  | chr1:181710350-181710450 |
| chr1 | 181715450 | 181715550 | 1167-Lng-A-T | 86   | chr1:181715450-181715550 |
| chr1 | 181895250 | 181895350 | 1223-Lng-D-T | 41   | chr1:181895250-181895350 |
| chr1 | 181897350 | 181897450 | 1152-Lng-A-T | 330  | chr1:181897350-181897450 |
| chr1 | 181898650 | 181898750 | 1274-Lng-A-T | 99   | chr1:181898650-181898750 |
| chr1 | 181931150 | 181931250 | 901-Lng-B-T  | 239  | chr1:181931150-181931250 |
| chr1 | 182007750 | 182007850 | 1223-Lng-D-T | 51   | chr1:182007750-182007850 |
| chr1 | 182246550 | 182246650 | 1274-Lng-A-T | 67   | chr1:182246550-182246650 |
| chr1 | 182253950 | 182254050 | 1072-Lng-A-T | 65   | chr1:182253950-182254050 |
| chr1 | 182349750 | 182349850 | 1065-Lng-A-T | 87   | chr1:182349750-182349850 |
| chr1 | 182663550 | 182663650 | 1223-Lng-B-T | 55   | chr1:182663550-182663650 |
| chr1 | 182892150 | 182892250 | 1100-Lng-A-T | 64   | chr1:182892150-182892250 |
| chr1 | 182938650 | 182938750 | 1151-Lng-A-T | 140  | chr1:182938650-182938750 |
| chr1 | 182942550 | 182942650 | 901-Lng-C-T  | 51   | chr1:182942550-182942650 |
| chr1 | 183126250 | 183126350 | 1274-Lng-A-T | 143  | chr1:183126250-183126350 |
| chr1 | 183138550 | 183138650 | 1188-Lng-A-T | 104  | chr1:183138550-183138650 |
| chr1 | 183443950 | 183444050 | 1065-Lng-C-T | 742  | chr1:183443950-183444050 |
| chr1 | 183767350 | 183767450 | 901-Lng-C-T  | 281  | chr1:183767350-183767450 |

**Table S2: SB Insertion regions**

|      |           |           |              |      |                          |
|------|-----------|-----------|--------------|------|--------------------------|
| chr1 | 183872450 | 183872550 | 1090-Lng-A-T | 59   | chr1:183872450-183872550 |
| chr1 | 183977450 | 183977550 | 1223-Lng-C-T | 43   | chr1:183977450-183977550 |
| chr1 | 184059250 | 184059350 | 1151-Lng-A-T | 185  | chr1:184059250-184059350 |
| chr1 | 184205050 | 184205150 | 1072-Lng-A-T | 106  | chr1:184205050-184205150 |
| chr1 | 184205050 | 184205150 | 1223-Lng-C-T | 52   | chr1:184205050-184205150 |
| chr1 | 184207150 | 184207250 | 1151-Lng-A-T | 135  | chr1:184207150-184207250 |
| chr1 | 184222250 | 184222350 | 901-Lng-C-T  | 30   | chr1:184222250-184222350 |
| chr1 | 184246150 | 184246250 | 901-Lng-B-T  | 68   | chr1:184246150-184246250 |
| chr1 | 184321350 | 184321450 | 1167-Lng-A-T | 177  | chr1:184321350-184321450 |
| chr1 | 184341350 | 184341450 | 1151-Lng-A-T | 361  | chr1:184341350-184341450 |
| chr1 | 184446750 | 184446850 | 1152-Lng-A-T | 160  | chr1:184446750-184446850 |
| chr1 | 184593450 | 184593550 | 1223-Lng-A-T | 172  | chr1:184593450-184593550 |
| chr1 | 184902750 | 184902850 | 1072-Lng-A-T | 227  | chr1:184902750-184902850 |
| chr1 | 185755350 | 185755450 | 1072-Lng-A-T | 48   | chr1:185755350-185755450 |
| chr1 | 185792050 | 185792150 | 901-Lng-B-T  | 90   | chr1:185792050-185792150 |
| chr1 | 185858850 | 185858950 | 1188-Lng-A-T | 293  | chr1:185858850-185858950 |
| chr1 | 185906950 | 185907050 | 1065-Lng-A-T | 46   | chr1:185906950-185907050 |
| chr1 | 185955450 | 185955550 | 1167-Lng-A-T | 49   | chr1:185955450-185955550 |
| chr1 | 186603950 | 186604050 | 1223-Lng-B-T | 196  | chr1:186603950-186604050 |
| chr1 | 186618750 | 186618850 | 1152-Lng-A-T | 140  | chr1:186618750-186618850 |
| chr1 | 186664450 | 186664550 | 1065-Lng-C-T | 75   | chr1:186664450-186664550 |
| chr1 | 187039650 | 187039750 | 1152-Lng-A-T | 40   | chr1:187039650-187039750 |
| chr1 | 187062350 | 187062450 | 1151-Lng-A-T | 489  | chr1:187062350-187062450 |
| chr1 | 187151350 | 187151450 | 1223-Lng-B-T | 306  | chr1:187151350-187151450 |
| chr1 | 187202950 | 187203050 | 1188-Lng-A-T | 116  | chr1:187202950-187203050 |
| chr1 | 187226850 | 187226950 | 1223-Lng-C-T | 114  | chr1:187226850-187226950 |
| chr1 | 187231850 | 187231950 | 901-Lng-B-T  | 161  | chr1:187231850-187231950 |
| chr1 | 187678950 | 187679050 | 1100-Lng-B-T | 68   | chr1:187678950-187679050 |
| chr1 | 187766650 | 187766750 | 1004-Lng-A-T | 51   | chr1:187766650-187766750 |
| chr1 | 187871250 | 187871350 | 901-Lng-C-T  | 40   | chr1:187871250-187871350 |
| chr1 | 188020450 | 188020550 | 901-Lng-C-T  | 62   | chr1:188020450-188020550 |
| chr1 | 188023150 | 188023250 | 1223-Lng-C-T | 166  | chr1:188023150-188023250 |
| chr1 | 188471650 | 188471750 | 1065-Lng-B-T | 50   | chr1:188471650-188471750 |
| chr1 | 189046450 | 189046550 | 1072-Lng-A-T | 153  | chr1:189046450-189046550 |
| chr1 | 189053250 | 189053350 | 1065-Lng-B-T | 41   | chr1:189053250-189053350 |
| chr1 | 189061050 | 189061150 | 1072-Lng-A-T | 63   | chr1:189061050-189061150 |
| chr1 | 189074250 | 189074350 | 846-Lng-A-T  | 76   | chr1:189074250-189074350 |
| chr1 | 189087350 | 189087450 | 1065-Lng-A-T | 62   | chr1:189087350-189087450 |
| chr1 | 189112450 | 189112550 | 846-Lng-A-T  | 61   | chr1:189112450-189112550 |
| chr1 | 189117850 | 189117950 | 846-Lng-A-T  | 1951 | chr1:189117850-189117950 |
| chr1 | 189118850 | 189118950 | 1274-Lng-A-T | 59   | chr1:189118850-189118950 |
| chr1 | 189130150 | 189130250 | 1223-Lng-D-T | 65   | chr1:189130150-189130250 |
| chr1 | 189136050 | 189136150 | 1004-Lng-A-T | 59   | chr1:189136050-189136150 |
| chr1 | 189269350 | 189269450 | 1223-Lng-C-T | 64   | chr1:189269350-189269450 |
| chr1 | 189383950 | 189384050 | 846-Lng-A-T  | 70   | chr1:189383950-189384050 |
| chr1 | 189571750 | 189571850 | 1072-Lng-A-T | 51   | chr1:189571750-189571850 |

**Table S2: SB Insertion regions**

|      |           |           |              |      |                          |
|------|-----------|-----------|--------------|------|--------------------------|
| chr1 | 189746150 | 189746250 | 1274-Lng-A-T | 113  | chr1:189746150-189746250 |
| chr1 | 189880450 | 189880550 | 1223-Lng-B-T | 61   | chr1:189880450-189880550 |
| chr1 | 189965450 | 189965550 | 1072-Lng-A-T | 118  | chr1:189965450-189965550 |
| chr1 | 190307950 | 190308050 | 1065-Lng-A-T | 76   | chr1:190307950-190308050 |
| chr1 | 190322450 | 190322550 | 1004-Lng-A-T | 88   | chr1:190322450-190322550 |
| chr1 | 190500050 | 190500150 | 846-Lng-A-T  | 150  | chr1:190500050-190500150 |
| chr1 | 190530950 | 190531050 | 1274-Lng-A-T | 52   | chr1:190530950-190531050 |
| chr1 | 190622950 | 190623050 | 901-Lng-B-T  | 151  | chr1:190622950-190623050 |
| chr1 | 190827950 | 190828050 | 1188-Lng-A-T | 41   | chr1:190827950-190828050 |
| chr1 | 190912150 | 190912250 | 1223-Lng-B-T | 93   | chr1:190912150-190912250 |
| chr1 | 191027050 | 191027150 | 1100-Lng-B-T | 58   | chr1:191027050-191027150 |
| chr1 | 191105250 | 191105350 | 1072-Lng-A-T | 208  | chr1:191105250-191105350 |
| chr1 | 191143450 | 191143550 | 1090-Lng-A-T | 79   | chr1:191143450-191143550 |
| chr1 | 191154750 | 191154850 | 901-Lng-D-T  | 526  | chr1:191154750-191154850 |
| chr1 | 191178050 | 191178150 | 846-Lng-A-T  | 182  | chr1:191178050-191178150 |
| chr1 | 191472450 | 191472550 | 1072-Lng-A-T | 57   | chr1:191472450-191472550 |
| chr1 | 191492650 | 191492750 | 1072-Lng-A-T | 149  | chr1:191492650-191492750 |
| chr1 | 191600750 | 191600850 | 1152-Lng-A-T | 37   | chr1:191600750-191600850 |
| chr1 | 191737850 | 191737950 | 1188-Lng-A-T | 34   | chr1:191737850-191737950 |
| chr1 | 191755050 | 191755150 | 846-Lng-A-T  | 104  | chr1:191755050-191755150 |
| chr1 | 191932050 | 191932150 | 901-Lng-C-T  | 32   | chr1:191932050-191932150 |
| chr1 | 192144350 | 192144450 | 1223-Lng-C-T | 46   | chr1:192144350-192144450 |
| chr1 | 192389450 | 192389550 | 1065-Lng-C-T | 81   | chr1:192389450-192389550 |
| chr1 | 192410950 | 192411050 | 1100-Lng-A-T | 105  | chr1:192410950-192411050 |
| chr1 | 192495850 | 192495950 | 1065-Lng-C-T | 77   | chr1:192495850-192495950 |
| chr1 | 192616550 | 192616650 | 1065-Lng-A-T | 96   | chr1:192616550-192616650 |
| chr1 | 192631750 | 192631850 | 901-Lng-D-T  | 355  | chr1:192631750-192631850 |
| chr1 | 192744450 | 192744550 | 1065-Lng-C-T | 128  | chr1:192744450-192744550 |
| chr1 | 193194950 | 193195050 | 1072-Lng-A-T | 60   | chr1:193194950-193195050 |
| chr1 | 193195050 | 193195150 | 1065-Lng-C-T | 1006 | chr1:193195050-193195150 |
| chr1 | 193246750 | 193246850 | 901-Lng-A-T  | 150  | chr1:193246750-193246850 |
| chr1 | 193533350 | 193533450 | 1167-Lng-A-T | 49   | chr1:193533350-193533450 |
| chr1 | 193564050 | 193564150 | 901-Lng-A-T  | 88   | chr1:193564050-193564150 |
| chr1 | 193693850 | 193693950 | 1072-Lng-A-T | 170  | chr1:193693850-193693950 |
| chr1 | 193925950 | 193926050 | 1152-Lng-A-T | 47   | chr1:193925950-193926050 |
| chr1 | 193930750 | 193930850 | 846-Lng-A-T  | 71   | chr1:193930750-193930850 |
| chr1 | 193959550 | 193959650 | 1223-Lng-B-T | 273  | chr1:193959550-193959650 |
| chr1 | 194034050 | 194034150 | 1223-Lng-A-T | 54   | chr1:194034050-194034150 |
| chr1 | 194103950 | 194104050 | 901-Lng-C-T  | 103  | chr1:194103950-194104050 |
| chr1 | 194280250 | 194280350 | 1151-Lng-A-T | 54   | chr1:194280250-194280350 |
| chr1 | 194345850 | 194345950 | 1152-Lng-A-T | 67   | chr1:194345850-194345950 |
| chr1 | 194626350 | 194626450 | 1100-Lng-A-T | 91   | chr1:194626350-194626450 |
| chr1 | 194739850 | 194739950 | 1072-Lng-A-T | 126  | chr1:194739850-194739950 |
| chr1 | 194757750 | 194757850 | 1004-Lng-A-T | 592  | chr1:194757750-194757850 |
| chr1 | 194985850 | 194985950 | 1004-Lng-A-T | 67   | chr1:194985850-194985950 |
| chr1 | 195172050 | 195172150 | 1065-Lng-C-T | 75   | chr1:195172050-195172150 |

**Table S2: SB Insertion regions**

|       |           |           |              |     |                          |
|-------|-----------|-----------|--------------|-----|--------------------------|
| chr1  | 195448350 | 195448450 | 1065-Lng-C-T | 84  | chr1:195448350-195448450 |
| chr1  | 195701150 | 195701250 | 1223-Lng-C-T | 47  | chr1:195701150-195701250 |
| chr1  | 195823650 | 195823750 | 901-Lng-B-T  | 55  | chr1:195823650-195823750 |
| chr1  | 195895950 | 195896050 | 1274-Lng-A-T | 54  | chr1:195895950-195896050 |
| chr1  | 195996750 | 195996850 | 1065-Lng-A-T | 85  | chr1:195996750-195996850 |
| chr1  | 196383550 | 196383650 | 1065-Lng-B-T | 198 | chr1:196383550-196383650 |
| chr1  | 196410650 | 196410750 | 1223-Lng-C-T | 52  | chr1:196410650-196410750 |
| chr1  | 196472950 | 196473050 | 901-Lng-A-T  | 76  | chr1:196472950-196473050 |
| chr1  | 196497250 | 196497350 | 1072-Lng-A-T | 68  | chr1:196497250-196497350 |
| chr1  | 196545750 | 196545850 | 1151-Lng-A-T | 117 | chr1:196545750-196545850 |
| chr1  | 196572950 | 196573050 | 1004-Lng-A-T | 75  | chr1:196572950-196573050 |
| chr1  | 196614550 | 196614650 | 901-Lng-C-T  | 42  | chr1:196614550-196614650 |
| chr1  | 196812150 | 196812250 | 1065-Lng-B-T | 94  | chr1:196812150-196812250 |
| chr1  | 196838450 | 196838550 | 1152-Lng-A-T | 374 | chr1:196838450-196838550 |
| chr1  | 196854350 | 196854450 | 1223-Lng-B-T | 35  | chr1:196854350-196854450 |
| chr1  | 196949550 | 196949650 | 1065-Lng-C-T | 82  | chr1:196949550-196949650 |
| chr1  | 196956050 | 196956150 | 901-Lng-D-T  | 533 | chr1:196956050-196956150 |
| chr1  | 196982650 | 196982750 | 1100-Lng-B-T | 67  | chr1:196982650-196982750 |
| chr1  | 197047250 | 197047350 | 1274-Lng-A-T | 94  | chr1:197047250-197047350 |
| chr10 | 3138750   | 3138850   | 1167-Lng-A-T | 216 | chr10:3138750-3138850    |
| chr10 | 3145250   | 3145350   | 1090-Lng-A-T | 61  | chr10:3145250-3145350    |
| chr10 | 3217950   | 3218050   | 901-Lng-C-T  | 60  | chr10:3217950-3218050    |
| chr10 | 3365050   | 3365150   | 1072-Lng-A-T | 56  | chr10:3365050-3365150    |
| chr10 | 3391650   | 3391750   | 1065-Lng-A-T | 129 | chr10:3391650-3391750    |
| chr10 | 3450650   | 3450750   | 1065-Lng-B-T | 69  | chr10:3450650-3450750    |
| chr10 | 3526050   | 3526150   | 1065-Lng-B-T | 44  | chr10:3526050-3526150    |
| chr10 | 3848150   | 3848250   | 1065-Lng-A-T | 41  | chr10:3848150-3848250    |
| chr10 | 3926950   | 3927050   | 1065-Lng-C-T | 62  | chr10:3926950-3927050    |
| chr10 | 4012650   | 4012750   | 1152-Lng-A-T | 111 | chr10:4012650-4012750    |
| chr10 | 4398850   | 4398950   | 1090-Lng-A-T | 98  | chr10:4398850-4398950    |
| chr10 | 4438950   | 4439050   | 901-Lng-C-T  | 69  | chr10:4438950-4439050    |
| chr10 | 4538650   | 4538750   | 901-Lng-A-T  | 69  | chr10:4538650-4538750    |
| chr10 | 4657750   | 4657850   | 1223-Lng-D-T | 40  | chr10:4657750-4657850    |
| chr10 | 4721850   | 4721950   | 1065-Lng-C-T | 73  | chr10:4721850-4721950    |
| chr10 | 4804150   | 4804250   | 1223-Lng-B-T | 390 | chr10:4804150-4804250    |
| chr10 | 4807150   | 4807250   | 1090-Lng-A-T | 202 | chr10:4807150-4807250    |
| chr10 | 5239650   | 5239750   | 1090-Lng-A-T | 61  | chr10:5239650-5239750    |
| chr10 | 5281250   | 5281350   | 1152-Lng-A-T | 66  | chr10:5281250-5281350    |
| chr10 | 5304750   | 5304850   | 1004-Lng-A-T | 65  | chr10:5304750-5304850    |
| chr10 | 5490250   | 5490350   | 1151-Lng-A-T | 72  | chr10:5490250-5490350    |
| chr10 | 5943950   | 5944050   | 901-Lng-D-T  | 249 | chr10:5943950-5944050    |
| chr10 | 5945450   | 5945550   | 1167-Lng-A-T | 48  | chr10:5945450-5945550    |
| chr10 | 5973850   | 5973950   | 846-Lng-A-T  | 141 | chr10:5973850-5973950    |
| chr10 | 5996150   | 5996250   | 1100-Lng-B-T | 57  | chr10:5996150-5996250    |
| chr10 | 6021950   | 6022050   | 1090-Lng-B-T | 163 | chr10:6021950-6022050    |
| chr10 | 6263850   | 6263950   | 1100-Lng-A-T | 73  | chr10:6263850-6263950    |

**Table S2: SB Insertion regions**

|       |         |         |              |     |                       |
|-------|---------|---------|--------------|-----|-----------------------|
| chr10 | 6267350 | 6267450 | 1090-Lng-A-T | 69  | chr10:6267350-6267450 |
| chr10 | 6327150 | 6327250 | 1004-Lng-A-T | 82  | chr10:6327150-6327250 |
| chr10 | 6419750 | 6419850 | 901-Lng-A-T  | 240 | chr10:6419750-6419850 |
| chr10 | 6549950 | 6550050 | 1065-Lng-A-T | 34  | chr10:6549950-6550050 |
| chr10 | 6707350 | 6707450 | 901-Lng-C-T  | 42  | chr10:6707350-6707450 |
| chr10 | 6868350 | 6868450 | 1090-Lng-A-T | 51  | chr10:6868350-6868450 |
| chr10 | 6902150 | 6902250 | 1167-Lng-A-T | 107 | chr10:6902150-6902250 |
| chr10 | 6902650 | 6902750 | 1100-Lng-A-T | 66  | chr10:6902650-6902750 |
| chr10 | 6908050 | 6908150 | 1065-Lng-A-T | 82  | chr10:6908050-6908150 |
| chr10 | 6919550 | 6919650 | 1188-Lng-A-T | 74  | chr10:6919550-6919650 |
| chr10 | 6943350 | 6943450 | 1100-Lng-A-T | 82  | chr10:6943350-6943450 |
| chr10 | 6962850 | 6962950 | 901-Lng-A-T  | 53  | chr10:6962850-6962950 |
| chr10 | 6966650 | 6966750 | 1274-Lng-A-T | 67  | chr10:6966650-6966750 |
| chr10 | 6983250 | 6983350 | 1152-Lng-A-T | 84  | chr10:6983250-6983350 |
| chr10 | 6986050 | 6986150 | 1065-Lng-A-T | 62  | chr10:6986050-6986150 |
| chr10 | 7007550 | 7007650 | 1223-Lng-C-T | 47  | chr10:7007550-7007650 |
| chr10 | 7032450 | 7032550 | 1004-Lng-A-T | 978 | chr10:7032450-7032550 |
| chr10 | 7297250 | 7297350 | 846-Lng-A-T  | 105 | chr10:7297250-7297350 |
| chr10 | 7378150 | 7378250 | 1152-Lng-A-T | 120 | chr10:7378150-7378250 |
| chr10 | 7385850 | 7385950 | 846-Lng-A-T  | 195 | chr10:7385850-7385950 |
| chr10 | 7390850 | 7390950 | 1065-Lng-B-T | 78  | chr10:7390850-7390950 |
| chr10 | 7395850 | 7395950 | 1090-Lng-A-T | 190 | chr10:7395850-7395950 |
| chr10 | 7561750 | 7561850 | 1065-Lng-B-T | 54  | chr10:7561750-7561850 |
| chr10 | 7631750 | 7631850 | 1223-Lng-C-T | 135 | chr10:7631750-7631850 |
| chr10 | 7636150 | 7636250 | 1090-Lng-A-T | 60  | chr10:7636150-7636250 |
| chr10 | 7645250 | 7645350 | 846-Lng-A-T  | 117 | chr10:7645250-7645350 |
| chr10 | 7651650 | 7651750 | 901-Lng-D-T  | 60  | chr10:7651650-7651750 |
| chr10 | 7652150 | 7652250 | 901-Lng-A-T  | 94  | chr10:7652150-7652250 |
| chr10 | 7656050 | 7656150 | 1223-Lng-D-T | 48  | chr10:7656050-7656150 |
| chr10 | 7661250 | 7661350 | 846-Lng-A-T  | 65  | chr10:7661250-7661350 |
| chr10 | 7666750 | 7666850 | 1004-Lng-A-T | 100 | chr10:7666750-7666850 |
| chr10 | 7706550 | 7706650 | 1090-Lng-A-T | 131 | chr10:7706550-7706650 |
| chr10 | 8159450 | 8159550 | 1223-Lng-D-T | 41  | chr10:8159450-8159550 |
| chr10 | 8553050 | 8553150 | 1223-Lng-A-T | 92  | chr10:8553050-8553150 |
| chr10 | 8617850 | 8617950 | 1072-Lng-A-T | 49  | chr10:8617850-8617950 |
| chr10 | 8682450 | 8682550 | 901-Lng-B-T  | 73  | chr10:8682450-8682550 |
| chr10 | 8776050 | 8776150 | 1065-Lng-B-T | 93  | chr10:8776050-8776150 |
| chr10 | 8797650 | 8797750 | 1223-Lng-D-T | 46  | chr10:8797650-8797750 |
| chr10 | 9310250 | 9310350 | 846-Lng-A-T  | 49  | chr10:9310250-9310350 |
| chr10 | 9355150 | 9355250 | 1188-Lng-A-T | 102 | chr10:9355150-9355250 |
| chr10 | 9512850 | 9512950 | 901-Lng-B-T  | 361 | chr10:9512850-9512950 |
| chr10 | 9551050 | 9551150 | 1065-Lng-C-T | 73  | chr10:9551050-9551150 |
| chr10 | 9584250 | 9584350 | 901-Lng-D-T  | 308 | chr10:9584250-9584350 |
| chr10 | 9610550 | 9610650 | 1065-Lng-C-T | 74  | chr10:9610550-9610650 |
| chr10 | 9614850 | 9614950 | 1072-Lng-A-T | 135 | chr10:9614850-9614950 |
| chr10 | 9619750 | 9619850 | 1100-Lng-A-T | 90  | chr10:9619750-9619850 |

**Table S2: SB Insertion regions**

|       |          |          |              |      |                         |
|-------|----------|----------|--------------|------|-------------------------|
| chr10 | 9753750  | 9753850  | 1152-Lng-A-T | 35   | chr10:9753750-9753850   |
| chr10 | 9761550  | 9761650  | 846-Lng-A-T  | 51   | chr10:9761550-9761650   |
| chr10 | 9922150  | 9922250  | 901-Lng-A-T  | 67   | chr10:9922150-9922250   |
| chr10 | 10451150 | 10451250 | 1100-Lng-A-T | 73   | chr10:10451150-10451250 |
| chr10 | 10833950 | 10834050 | 1072-Lng-A-T | 73   | chr10:10833950-10834050 |
| chr10 | 10834050 | 10834150 | 1152-Lng-A-T | 51   | chr10:10834050-10834150 |
| chr10 | 10931050 | 10931150 | 846-Lng-A-T  | 55   | chr10:10931050-10931150 |
| chr10 | 11003650 | 11003750 | 1065-Lng-B-T | 58   | chr10:11003650-11003750 |
| chr10 | 11009050 | 11009150 | 1223-Lng-B-T | 41   | chr10:11009050-11009150 |
| chr10 | 11012150 | 11012250 | 1274-Lng-A-T | 63   | chr10:11012150-11012250 |
| chr10 | 11158750 | 11158850 | 1065-Lng-A-T | 37   | chr10:11158750-11158850 |
| chr10 | 11454150 | 11454250 | 901-Lng-B-T  | 197  | chr10:11454150-11454250 |
| chr10 | 11610850 | 11610950 | 901-Lng-B-T  | 205  | chr10:11610850-11610950 |
| chr10 | 11664050 | 11664150 | 1065-Lng-B-T | 48   | chr10:11664050-11664150 |
| chr10 | 11910750 | 11910850 | 901-Lng-C-T  | 127  | chr10:11910750-11910850 |
| chr10 | 12130850 | 12130950 | 1090-Lng-A-T | 77   | chr10:12130850-12130950 |
| chr10 | 12136150 | 12136250 | 1090-Lng-A-T | 56   | chr10:12136150-12136250 |
| chr10 | 12161550 | 12161650 | 901-Lng-B-T  | 79   | chr10:12161550-12161650 |
| chr10 | 12205150 | 12205250 | 1223-Lng-A-T | 279  | chr10:12205150-12205250 |
| chr10 | 12236650 | 12236750 | 1090-Lng-B-T | 408  | chr10:12236650-12236750 |
| chr10 | 12299250 | 12299350 | 846-Lng-A-T  | 109  | chr10:12299250-12299350 |
| chr10 | 12337750 | 12337850 | 1065-Lng-C-T | 86   | chr10:12337750-12337850 |
| chr10 | 12373650 | 12373750 | 1100-Lng-A-T | 115  | chr10:12373650-12373750 |
| chr10 | 12393750 | 12393850 | 901-Lng-D-T  | 203  | chr10:12393750-12393850 |
| chr10 | 12416050 | 12416150 | 1152-Lng-A-T | 100  | chr10:12416050-12416150 |
| chr10 | 12458450 | 12458550 | 901-Lng-B-T  | 38   | chr10:12458450-12458550 |
| chr10 | 12463150 | 12463250 | 1100-Lng-B-T | 90   | chr10:12463150-12463250 |
| chr10 | 12482750 | 12482850 | 1151-Lng-A-T | 453  | chr10:12482750-12482850 |
| chr10 | 12517850 | 12517950 | 846-Lng-A-T  | 100  | chr10:12517850-12517950 |
| chr10 | 12537950 | 12538050 | 1223-Lng-D-T | 54   | chr10:12537950-12538050 |
| chr10 | 12630450 | 12630550 | 1223-Lng-C-T | 1273 | chr10:12630450-12630550 |
| chr10 | 12697550 | 12697650 | 1151-Lng-A-T | 60   | chr10:12697550-12697650 |
| chr10 | 12959550 | 12959650 | 1065-Lng-C-T | 331  | chr10:12959550-12959650 |
| chr10 | 13210150 | 13210250 | 901-Lng-C-T  | 45   | chr10:13210150-13210250 |
| chr10 | 13331950 | 13332050 | 1072-Lng-A-T | 113  | chr10:13331950-13332050 |
| chr10 | 13369150 | 13369250 | 1223-Lng-C-T | 44   | chr10:13369150-13369250 |
| chr10 | 13372050 | 13372150 | 1188-Lng-A-T | 82   | chr10:13372050-13372150 |
| chr10 | 13453250 | 13453350 | 1004-Lng-A-T | 113  | chr10:13453250-13453350 |
| chr10 | 13533250 | 13533350 | 1274-Lng-A-T | 71   | chr10:13533250-13533350 |
| chr10 | 13557250 | 13557350 | 1065-Lng-B-T | 69   | chr10:13557250-13557350 |
| chr10 | 13682350 | 13682450 | 1151-Lng-A-T | 54   | chr10:13682350-13682450 |
| chr10 | 13712350 | 13712450 | 1065-Lng-A-T | 54   | chr10:13712350-13712450 |
| chr10 | 13732950 | 13733050 | 901-Lng-A-T  | 82   | chr10:13732950-13733050 |
| chr10 | 13749750 | 13749850 | 1152-Lng-A-T | 364  | chr10:13749750-13749850 |
| chr10 | 13762850 | 13762950 | 1065-Lng-A-T | 49   | chr10:13762850-13762950 |
| chr10 | 14016350 | 14016450 | 1188-Lng-A-T | 35   | chr10:14016350-14016450 |

**Table S2: SB Insertion regions**

|       |          |          |              |     |                         |
|-------|----------|----------|--------------|-----|-------------------------|
| chr10 | 14138550 | 14138650 | 1065-Lng-A-T | 79  | chr10:14138550-14138650 |
| chr10 | 14283950 | 14284050 | 1065-Lng-B-T | 44  | chr10:14283950-14284050 |
| chr10 | 14387650 | 14387750 | 1223-Lng-C-T | 58  | chr10:14387650-14387750 |
| chr10 | 14388650 | 14388750 | 901-Lng-B-T  | 35  | chr10:14388650-14388750 |
| chr10 | 14392950 | 14393050 | 1065-Lng-B-T | 44  | chr10:14392950-14393050 |
| chr10 | 14418250 | 14418350 | 901-Lng-C-T  | 81  | chr10:14418250-14418350 |
| chr10 | 14425650 | 14425750 | 901-Lng-A-T  | 104 | chr10:14425650-14425750 |
| chr10 | 14474750 | 14474850 | 901-Lng-B-T  | 217 | chr10:14474750-14474850 |
| chr10 | 14494750 | 14494850 | 1065-Lng-B-T | 71  | chr10:14494750-14494850 |
| chr10 | 14611850 | 14611950 | 1152-Lng-A-T | 104 | chr10:14611850-14611950 |
| chr10 | 14638450 | 14638550 | 1004-Lng-A-T | 70  | chr10:14638450-14638550 |
| chr10 | 14815250 | 14815350 | 901-Lng-C-T  | 883 | chr10:14815250-14815350 |
| chr10 | 14849750 | 14849850 | 1090-Lng-A-T | 115 | chr10:14849750-14849850 |
| chr10 | 15024450 | 15024550 | 1065-Lng-B-T | 68  | chr10:15024450-15024550 |
| chr10 | 15124450 | 15124550 | 1100-Lng-B-T | 56  | chr10:15124450-15124550 |
| chr10 | 15199050 | 15199150 | 1065-Lng-A-T | 237 | chr10:15199050-15199150 |
| chr10 | 15477850 | 15477950 | 901-Lng-B-T  | 222 | chr10:15477850-15477950 |
| chr10 | 15660450 | 15660550 | 901-Lng-B-T  | 55  | chr10:15660450-15660550 |
| chr10 | 15748750 | 15748850 | 1065-Lng-C-T | 76  | chr10:15748750-15748850 |
| chr10 | 15863850 | 15863950 | 1004-Lng-A-T | 55  | chr10:15863850-15863950 |
| chr10 | 15863850 | 15863950 | 1152-Lng-A-T | 58  | chr10:15863850-15863950 |
| chr10 | 15941950 | 15942050 | 1065-Lng-A-T | 68  | chr10:15941950-15942050 |
| chr10 | 15955050 | 15955150 | 1065-Lng-C-T | 63  | chr10:15955050-15955150 |
| chr10 | 16342150 | 16342250 | 1223-Lng-A-T | 77  | chr10:16342150-16342250 |
| chr10 | 16385950 | 16386050 | 846-Lng-A-T  | 104 | chr10:16385950-16386050 |
| chr10 | 16578650 | 16578750 | 901-Lng-B-T  | 275 | chr10:16578650-16578750 |
| chr10 | 16578650 | 16578750 | 1152-Lng-A-T | 48  | chr10:16578650-16578750 |
| chr10 | 16686450 | 16686550 | 1188-Lng-A-T | 306 | chr10:16686450-16686550 |
| chr10 | 17074750 | 17074850 | 901-Lng-C-T  | 56  | chr10:17074750-17074850 |
| chr10 | 17103950 | 17104050 | 1065-Lng-C-T | 77  | chr10:17103950-17104050 |
| chr10 | 17195050 | 17195150 | 901-Lng-C-T  | 77  | chr10:17195050-17195150 |
| chr10 | 17228350 | 17228450 | 1090-Lng-A-T | 179 | chr10:17228350-17228450 |
| chr10 | 17409550 | 17409650 | 1065-Lng-A-T | 106 | chr10:17409550-17409650 |
| chr10 | 17526150 | 17526250 | 1090-Lng-A-T | 53  | chr10:17526150-17526250 |
| chr10 | 17634250 | 17634350 | 1151-Lng-A-T | 55  | chr10:17634250-17634350 |
| chr10 | 17783950 | 17784050 | 901-Lng-B-T  | 84  | chr10:17783950-17784050 |
| chr10 | 17785150 | 17785250 | 1072-Lng-A-T | 49  | chr10:17785150-17785250 |
| chr10 | 17826650 | 17826750 | 1090-Lng-A-T | 63  | chr10:17826650-17826750 |
| chr10 | 17835350 | 17835450 | 1223-Lng-A-T | 71  | chr10:17835350-17835450 |
| chr10 | 17880850 | 17880950 | 1065-Lng-A-T | 38  | chr10:17880850-17880950 |
| chr10 | 18073250 | 18073350 | 1223-Lng-C-T | 43  | chr10:18073250-18073350 |
| chr10 | 18095950 | 18096050 | 1274-Lng-A-T | 293 | chr10:18095950-18096050 |
| chr10 | 18298350 | 18298450 | 1090-Lng-A-T | 91  | chr10:18298350-18298450 |
| chr10 | 18320650 | 18320750 | 1274-Lng-A-T | 58  | chr10:18320650-18320750 |
| chr10 | 18437050 | 18437150 | 1223-Lng-B-T | 162 | chr10:18437050-18437150 |
| chr10 | 18449450 | 18449550 | 1065-Lng-A-T | 37  | chr10:18449450-18449550 |



**Table S2: SB Insertion regions**

|       |          |          |              |      |                         |
|-------|----------|----------|--------------|------|-------------------------|
| chr10 | 18600750 | 18600850 | 1151-Lng-A-T | 57   | chr10:18600750-18600850 |
| chr10 | 18729150 | 18729250 | 1188-Lng-A-T | 362  | chr10:18729150-18729250 |
| chr10 | 18732150 | 18732250 | 1274-Lng-A-T | 1027 | chr10:18732150-18732250 |
| chr10 | 19148550 | 19148650 | 901-Lng-C-T  | 40   | chr10:19148550-19148650 |
| chr10 | 19349150 | 19349250 | 1065-Lng-B-T | 200  | chr10:19349150-19349250 |
| chr10 | 19351750 | 19351850 | 846-Lng-A-T  | 61   | chr10:19351750-19351850 |
| chr10 | 19381050 | 19381150 | 1090-Lng-A-T | 48   | chr10:19381050-19381150 |
| chr10 | 19679150 | 19679250 | 1274-Lng-A-T | 227  | chr10:19679150-19679250 |
| chr10 | 19679450 | 19679550 | 1223-Lng-A-T | 242  | chr10:19679450-19679550 |
| chr10 | 19706150 | 19706250 | 1090-Lng-A-T | 49   | chr10:19706150-19706250 |
| chr10 | 19758850 | 19758950 | 1223-Lng-C-T | 46   | chr10:19758850-19758950 |
| chr10 | 19779750 | 19779850 | 1274-Lng-A-T | 54   | chr10:19779750-19779850 |
| chr10 | 19803250 | 19803350 | 1274-Lng-A-T | 158  | chr10:19803250-19803350 |
| chr10 | 19846750 | 19846850 | 901-Lng-B-T  | 36   | chr10:19846750-19846850 |
| chr10 | 19900850 | 19900950 | 1151-Lng-A-T | 58   | chr10:19900850-19900950 |
| chr10 | 19904850 | 19904950 | 1274-Lng-A-T | 65   | chr10:19904850-19904950 |
| chr10 | 19963750 | 19963850 | 1100-Lng-B-T | 94   | chr10:19963750-19963850 |
| chr10 | 19992250 | 19992350 | 1223-Lng-C-T | 257  | chr10:19992250-19992350 |
| chr10 | 20037550 | 20037650 | 1223-Lng-B-T | 334  | chr10:20037550-20037650 |
| chr10 | 20113150 | 20113250 | 1100-Lng-A-T | 61   | chr10:20113150-20113250 |
| chr10 | 20123650 | 20123750 | 901-Lng-B-T  | 244  | chr10:20123650-20123750 |
| chr10 | 20146650 | 20146750 | 1167-Lng-A-T | 236  | chr10:20146650-20146750 |
| chr10 | 20182350 | 20182450 | 1065-Lng-A-T | 36   | chr10:20182350-20182450 |
| chr10 | 20202250 | 20202350 | 1151-Lng-A-T | 58   | chr10:20202250-20202350 |
| chr10 | 20211850 | 20211950 | 1274-Lng-A-T | 98   | chr10:20211850-20211950 |
| chr10 | 20223350 | 20223450 | 1065-Lng-B-T | 207  | chr10:20223350-20223450 |
| chr10 | 20244850 | 20244950 | 1151-Lng-A-T | 73   | chr10:20244850-20244950 |
| chr10 | 20334650 | 20334750 | 1151-Lng-A-T | 66   | chr10:20334650-20334750 |
| chr10 | 20506250 | 20506350 | 1223-Lng-B-T | 41   | chr10:20506250-20506350 |
| chr10 | 20780550 | 20780650 | 1065-Lng-B-T | 41   | chr10:20780550-20780650 |
| chr10 | 20853850 | 20853950 | 1090-Lng-A-T | 44   | chr10:20853850-20853950 |
| chr10 | 21025750 | 21025850 | 901-Lng-A-T  | 53   | chr10:21025750-21025850 |
| chr10 | 21041950 | 21042050 | 1065-Lng-A-T | 41   | chr10:21041950-21042050 |
| chr10 | 21074950 | 21075050 | 901-Lng-C-T  | 213  | chr10:21074950-21075050 |
| chr10 | 21803950 | 21804050 | 901-Lng-B-T  | 158  | chr10:21803950-21804050 |
| chr10 | 22389950 | 22390050 | 1004-Lng-A-T | 73   | chr10:22389950-22390050 |
| chr10 | 22427450 | 22427550 | 1223-Lng-B-T | 36   | chr10:22427450-22427550 |
| chr10 | 22711950 | 22712050 | 1223-Lng-B-T | 48   | chr10:22711950-22712050 |
| chr10 | 22712650 | 22712750 | 846-Lng-A-T  | 111  | chr10:22712650-22712750 |
| chr10 | 22922750 | 22922850 | 1274-Lng-A-T | 85   | chr10:22922750-22922850 |
| chr10 | 22948150 | 22948250 | 1065-Lng-A-T | 36   | chr10:22948150-22948250 |
| chr10 | 23523650 | 23523750 | 901-Lng-A-T  | 73   | chr10:23523650-23523750 |
| chr10 | 23755050 | 23755150 | 1152-Lng-A-T | 81   | chr10:23755050-23755150 |
| chr10 | 23872350 | 23872450 | 1065-Lng-A-T | 91   | chr10:23872350-23872450 |
| chr10 | 23902650 | 23902750 | 1090-Lng-A-T | 73   | chr10:23902650-23902750 |
| chr10 | 23906350 | 23906450 | 846-Lng-A-T  | 98   | chr10:23906350-23906450 |

**Table S2: SB Insertion regions**

|       |          |          |              |      |                         |
|-------|----------|----------|--------------|------|-------------------------|
| chr10 | 23986750 | 23986850 | 1188-Lng-A-T | 38   | chr10:23986750-23986850 |
| chr10 | 24008850 | 24008950 | 1090-Lng-A-T | 2243 | chr10:24008850-24008950 |
| chr10 | 24099750 | 24099850 | 1065-Lng-B-T | 63   | chr10:24099750-24099850 |
| chr10 | 24262350 | 24262450 | 1223-Lng-A-T | 187  | chr10:24262350-24262450 |
| chr10 | 24605950 | 24606050 | 1065-Lng-A-T | 73   | chr10:24605950-24606050 |
| chr10 | 24626750 | 24626850 | 1100-Lng-A-T | 122  | chr10:24626750-24626850 |
| chr10 | 24681950 | 24682050 | 901-Lng-D-T  | 326  | chr10:24681950-24682050 |
| chr10 | 24696250 | 24696350 | 1151-Lng-A-T | 71   | chr10:24696250-24696350 |
| chr10 | 24706850 | 24706950 | 1004-Lng-A-T | 53   | chr10:24706850-24706950 |
| chr10 | 25230650 | 25230750 | 846-Lng-A-T  | 103  | chr10:25230650-25230750 |
| chr10 | 25457850 | 25457950 | 901-Lng-B-T  | 216  | chr10:25457850-25457950 |
| chr10 | 25481050 | 25481150 | 1188-Lng-A-T | 54   | chr10:25481050-25481150 |
| chr10 | 25559250 | 25559350 | 1065-Lng-A-T | 78   | chr10:25559250-25559350 |
| chr10 | 25609250 | 25609350 | 1072-Lng-A-T | 50   | chr10:25609250-25609350 |
| chr10 | 25642250 | 25642350 | 1274-Lng-A-T | 64   | chr10:25642250-25642350 |
| chr10 | 25718350 | 25718450 | 1065-Lng-B-T | 122  | chr10:25718350-25718450 |
| chr10 | 25837850 | 25837950 | 1090-Lng-A-T | 72   | chr10:25837850-25837950 |
| chr10 | 26052050 | 26052150 | 1152-Lng-A-T | 117  | chr10:26052050-26052150 |
| chr10 | 26079650 | 26079750 | 1090-Lng-A-T | 44   | chr10:26079650-26079750 |
| chr10 | 26102850 | 26102950 | 1072-Lng-A-T | 168  | chr10:26102850-26102950 |
| chr10 | 26367150 | 26367250 | 1004-Lng-A-T | 74   | chr10:26367150-26367250 |
| chr10 | 26403450 | 26403550 | 846-Lng-A-T  | 85   | chr10:26403450-26403550 |
| chr10 | 26459850 | 26459950 | 1065-Lng-A-T | 78   | chr10:26459850-26459950 |
| chr10 | 26478450 | 26478550 | 1004-Lng-A-T | 167  | chr10:26478450-26478550 |
| chr10 | 26575650 | 26575750 | 1090-Lng-A-T | 72   | chr10:26575650-26575750 |
| chr10 | 26578650 | 26578750 | 901-Lng-A-T  | 124  | chr10:26578650-26578750 |
| chr10 | 26729950 | 26730050 | 1152-Lng-A-T | 60   | chr10:26729950-26730050 |
| chr10 | 26897450 | 26897550 | 1065-Lng-B-T | 40   | chr10:26897450-26897550 |
| chr10 | 27030150 | 27030250 | 1223-Lng-B-T | 61   | chr10:27030150-27030250 |
| chr10 | 27163250 | 27163350 | 901-Lng-C-T  | 52   | chr10:27163250-27163350 |
| chr10 | 27352950 | 27353050 | 1090-Lng-A-T | 44   | chr10:27352950-27353050 |
| chr10 | 27383350 | 27383450 | 846-Lng-A-T  | 95   | chr10:27383350-27383450 |
| chr10 | 27819750 | 27819850 | 1274-Lng-A-T | 117  | chr10:27819750-27819850 |
| chr10 | 27826150 | 27826250 | 901-Lng-A-T  | 133  | chr10:27826150-27826250 |
| chr10 | 27833850 | 27833950 | 1151-Lng-A-T | 98   | chr10:27833850-27833950 |
| chr10 | 27893550 | 27893650 | 1223-Lng-B-T | 259  | chr10:27893550-27893650 |
| chr10 | 27902450 | 27902550 | 1223-Lng-D-T | 43   | chr10:27902450-27902550 |
| chr10 | 27903150 | 27903250 | 1151-Lng-A-T | 215  | chr10:27903150-27903250 |
| chr10 | 27904850 | 27904950 | 901-Lng-B-T  | 105  | chr10:27904850-27904950 |
| chr10 | 27923950 | 27924050 | 1100-Lng-A-T | 110  | chr10:27923950-27924050 |
| chr10 | 27960950 | 27961050 | 1090-Lng-A-T | 80   | chr10:27960950-27961050 |
| chr10 | 28000250 | 28000350 | 1223-Lng-D-T | 45   | chr10:28000250-28000350 |
| chr10 | 28001650 | 28001750 | 1072-Lng-A-T | 48   | chr10:28001650-28001750 |
| chr10 | 28011750 | 28011850 | 846-Lng-A-T  | 91   | chr10:28011750-28011850 |
| chr10 | 28068250 | 28068350 | 901-Lng-A-T  | 102  | chr10:28068250-28068350 |
| chr10 | 28211050 | 28211150 | 1167-Lng-A-T | 78   | chr10:28211050-28211150 |

**Table S2: SB Insertion regions**

|       |          |          |              |      |                         |
|-------|----------|----------|--------------|------|-------------------------|
| chr10 | 28223250 | 28223350 | 846-Lng-A-T  | 177  | chr10:28223250-28223350 |
| chr10 | 28282050 | 28282150 | 846-Lng-A-T  | 264  | chr10:28282050-28282150 |
| chr10 | 28306650 | 28306750 | 901-Lng-B-T  | 88   | chr10:28306650-28306750 |
| chr10 | 28319950 | 28320050 | 1223-Lng-B-T | 464  | chr10:28319950-28320050 |
| chr10 | 28336050 | 28336150 | 1188-Lng-A-T | 42   | chr10:28336050-28336150 |
| chr10 | 28450850 | 28450950 | 1072-Lng-A-T | 151  | chr10:28450850-28450950 |
| chr10 | 28576050 | 28576150 | 1072-Lng-A-T | 54   | chr10:28576050-28576150 |
| chr10 | 28788450 | 28788550 | 1072-Lng-A-T | 54   | chr10:28788450-28788550 |
| chr10 | 28980550 | 28980650 | 1004-Lng-A-T | 76   | chr10:28980550-28980650 |
| chr10 | 29017650 | 29017750 | 1223-Lng-B-T | 52   | chr10:29017650-29017750 |
| chr10 | 29056250 | 29056350 | 1065-Lng-A-T | 63   | chr10:29056250-29056350 |
| chr10 | 29070950 | 29071050 | 1188-Lng-A-T | 59   | chr10:29070950-29071050 |
| chr10 | 29440350 | 29440450 | 1065-Lng-A-T | 42   | chr10:29440350-29440450 |
| chr10 | 30053350 | 30053450 | 1152-Lng-A-T | 52   | chr10:30053350-30053450 |
| chr10 | 30127150 | 30127250 | 1152-Lng-A-T | 65   | chr10:30127150-30127250 |
| chr10 | 30175050 | 30175150 | 1152-Lng-A-T | 81   | chr10:30175050-30175150 |
| chr10 | 30258250 | 30258350 | 1152-Lng-A-T | 87   | chr10:30258250-30258350 |
| chr10 | 30304750 | 30304850 | 1151-Lng-A-T | 54   | chr10:30304750-30304850 |
| chr10 | 30318650 | 30318750 | 1223-Lng-B-T | 42   | chr10:30318650-30318750 |
| chr10 | 30349750 | 30349850 | 1065-Lng-C-T | 68   | chr10:30349750-30349850 |
| chr10 | 30361150 | 30361250 | 1065-Lng-B-T | 89   | chr10:30361150-30361250 |
| chr10 | 30400750 | 30400850 | 1065-Lng-A-T | 58   | chr10:30400750-30400850 |
| chr10 | 30407150 | 30407250 | 1274-Lng-A-T | 82   | chr10:30407150-30407250 |
| chr10 | 30435450 | 30435550 | 1065-Lng-B-T | 89   | chr10:30435450-30435550 |
| chr10 | 30437550 | 30437650 | 901-Lng-C-T  | 42   | chr10:30437550-30437650 |
| chr10 | 30461550 | 30461650 | 1072-Lng-A-T | 55   | chr10:30461550-30461650 |
| chr10 | 30512350 | 30512450 | 1223-Lng-C-T | 54   | chr10:30512350-30512450 |
| chr10 | 30655550 | 30655650 | 1223-Lng-A-T | 114  | chr10:30655550-30655650 |
| chr10 | 30875050 | 30875150 | 1274-Lng-A-T | 60   | chr10:30875050-30875150 |
| chr10 | 30882450 | 30882550 | 1100-Lng-A-T | 56   | chr10:30882450-30882550 |
| chr10 | 31211150 | 31211250 | 1167-Lng-A-T | 114  | chr10:31211150-31211250 |
| chr10 | 31215050 | 31215150 | 1100-Lng-A-T | 55   | chr10:31215050-31215150 |
| chr10 | 31256550 | 31256650 | 1065-Lng-A-T | 97   | chr10:31256550-31256650 |
| chr10 | 31511250 | 31511350 | 1072-Lng-A-T | 61   | chr10:31511250-31511350 |
| chr10 | 31560850 | 31560950 | 1072-Lng-A-T | 130  | chr10:31560850-31560950 |
| chr10 | 32263050 | 32263150 | 1072-Lng-A-T | 65   | chr10:32263050-32263150 |
| chr10 | 32477950 | 32478050 | 1151-Lng-A-T | 70   | chr10:32477950-32478050 |
| chr10 | 33030350 | 33030450 | 901-Lng-A-T  | 370  | chr10:33030350-33030450 |
| chr10 | 33069350 | 33069450 | 901-Lng-D-T  | 193  | chr10:33069350-33069450 |
| chr10 | 33080550 | 33080650 | 1090-Lng-A-T | 68   | chr10:33080550-33080650 |
| chr10 | 33116350 | 33116450 | 1152-Lng-A-T | 103  | chr10:33116350-33116450 |
| chr10 | 33246950 | 33247050 | 1072-Lng-A-T | 61   | chr10:33246950-33247050 |
| chr10 | 33615950 | 33616050 | 846-Lng-A-T  | 77   | chr10:33615950-33616050 |
| chr10 | 33670150 | 33670250 | 1223-Lng-A-T | 238  | chr10:33670150-33670250 |
| chr10 | 34003450 | 34003550 | 1223-Lng-C-T | 1622 | chr10:34003450-34003550 |
| chr10 | 34008150 | 34008250 | 1151-Lng-A-T | 142  | chr10:34008150-34008250 |

**Table S2: SB Insertion regions**

|       |          |          |              |     |                         |
|-------|----------|----------|--------------|-----|-------------------------|
| chr10 | 34076450 | 34076550 | 1152-Lng-A-T | 106 | chr10:34076450-34076550 |
| chr10 | 34084150 | 34084250 | 901-Lng-B-T  | 74  | chr10:34084150-34084250 |
| chr10 | 34085950 | 34086050 | 1274-Lng-A-T | 213 | chr10:34085950-34086050 |
| chr10 | 34148550 | 34148650 | 901-Lng-B-T  | 108 | chr10:34148550-34148650 |
| chr10 | 34168750 | 34168850 | 1065-Lng-B-T | 60  | chr10:34168750-34168850 |
| chr10 | 34228550 | 34228650 | 1065-Lng-A-T | 83  | chr10:34228550-34228650 |
| chr10 | 34244050 | 34244150 | 1223-Lng-B-T | 36  | chr10:34244050-34244150 |
| chr10 | 34245350 | 34245450 | 901-Lng-B-T  | 80  | chr10:34245350-34245450 |
| chr10 | 34260050 | 34260150 | 1151-Lng-A-T | 118 | chr10:34260050-34260150 |
| chr10 | 34271250 | 34271350 | 1100-Lng-A-T | 85  | chr10:34271250-34271350 |
| chr10 | 34277050 | 34277150 | 1065-Lng-A-T | 51  | chr10:34277050-34277150 |
| chr10 | 34290450 | 34290550 | 1274-Lng-A-T | 59  | chr10:34290450-34290550 |
| chr10 | 34304550 | 34304650 | 1223-Lng-B-T | 38  | chr10:34304550-34304650 |
| chr10 | 34899350 | 34899450 | 1065-Lng-A-T | 34  | chr10:34899350-34899450 |
| chr10 | 34901750 | 34901850 | 1223-Lng-D-T | 40  | chr10:34901750-34901850 |
| chr10 | 34992650 | 34992750 | 1223-Lng-C-T | 52  | chr10:34992650-34992750 |
| chr10 | 35012050 | 35012150 | 901-Lng-A-T  | 365 | chr10:35012050-35012150 |
| chr10 | 35095250 | 35095350 | 1274-Lng-A-T | 57  | chr10:35095250-35095350 |
| chr10 | 35167250 | 35167350 | 1065-Lng-B-T | 74  | chr10:35167250-35167350 |
| chr10 | 35342850 | 35342950 | 1065-Lng-C-T | 103 | chr10:35342850-35342950 |
| chr10 | 35385550 | 35385650 | 1151-Lng-A-T | 273 | chr10:35385550-35385650 |
| chr10 | 35626250 | 35626350 | 1004-Lng-A-T | 319 | chr10:35626250-35626350 |
| chr10 | 35685350 | 35685450 | 1072-Lng-A-T | 68  | chr10:35685350-35685450 |
| chr10 | 35723350 | 35723450 | 1152-Lng-A-T | 34  | chr10:35723350-35723450 |
| chr10 | 35829350 | 35829450 | 1188-Lng-A-T | 61  | chr10:35829350-35829450 |
| chr10 | 35910050 | 35910150 | 1188-Lng-A-T | 38  | chr10:35910050-35910150 |
| chr10 | 35945750 | 35945850 | 901-Lng-A-T  | 65  | chr10:35945750-35945850 |
| chr10 | 35975650 | 35975750 | 1065-Lng-A-T | 52  | chr10:35975650-35975750 |
| chr10 | 36050950 | 36051050 | 1065-Lng-A-T | 43  | chr10:36050950-36051050 |
| chr10 | 36246250 | 36246350 | 901-Lng-C-T  | 46  | chr10:36246250-36246350 |
| chr10 | 36572850 | 36572950 | 901-Lng-A-T  | 308 | chr10:36572850-36572950 |
| chr10 | 36647150 | 36647250 | 1065-Lng-B-T | 48  | chr10:36647150-36647250 |
| chr10 | 36976450 | 36976550 | 1152-Lng-A-T | 93  | chr10:36976450-36976550 |
| chr10 | 37182050 | 37182150 | 901-Lng-C-T  | 86  | chr10:37182050-37182150 |
| chr10 | 37348550 | 37348650 | 1223-Lng-D-T | 53  | chr10:37348550-37348650 |
| chr10 | 37411250 | 37411350 | 901-Lng-B-T  | 153 | chr10:37411250-37411350 |
| chr10 | 37416150 | 37416250 | 901-Lng-A-T  | 71  | chr10:37416150-37416250 |
| chr10 | 37488450 | 37488550 | 1004-Lng-A-T | 65  | chr10:37488450-37488550 |
| chr10 | 37593850 | 37593950 | 1223-Lng-C-T | 69  | chr10:37593850-37593950 |
| chr10 | 37621350 | 37621450 | 1223-Lng-A-T | 284 | chr10:37621350-37621450 |
| chr10 | 37804750 | 37804850 | 901-Lng-D-T  | 248 | chr10:37804750-37804850 |
| chr10 | 37816550 | 37816650 | 1065-Lng-A-T | 45  | chr10:37816550-37816650 |
| chr10 | 38016150 | 38016250 | 901-Lng-B-T  | 69  | chr10:38016150-38016250 |
| chr10 | 38030450 | 38030550 | 1004-Lng-A-T | 303 | chr10:38030450-38030550 |
| chr10 | 38292350 | 38292450 | 901-Lng-D-T  | 272 | chr10:38292350-38292450 |
| chr10 | 38346450 | 38346550 | 1065-Lng-A-T | 60  | chr10:38346450-38346550 |

**Table S2: SB Insertion regions**

|       |          |          |              |     |                         |
|-------|----------|----------|--------------|-----|-------------------------|
| chr10 | 38518250 | 38518350 | 1065-Lng-A-T | 94  | chr10:38518250-38518350 |
| chr10 | 38796450 | 38796550 | 1274-Lng-A-T | 89  | chr10:38796450-38796550 |
| chr10 | 38814350 | 38814450 | 1100-Lng-A-T | 55  | chr10:38814350-38814450 |
| chr10 | 38988550 | 38988650 | 1065-Lng-B-T | 96  | chr10:38988550-38988650 |
| chr10 | 39049050 | 39049150 | 1065-Lng-C-T | 69  | chr10:39049050-39049150 |
| chr10 | 39158150 | 39158250 | 1090-Lng-B-T | 292 | chr10:39158150-39158250 |
| chr10 | 39359950 | 39360050 | 846-Lng-A-T  | 92  | chr10:39359950-39360050 |
| chr10 | 39426750 | 39426850 | 901-Lng-B-T  | 38  | chr10:39426750-39426850 |
| chr10 | 39465150 | 39465250 | 901-Lng-C-T  | 168 | chr10:39465150-39465250 |
| chr10 | 39473650 | 39473750 | 1167-Lng-A-T | 53  | chr10:39473650-39473750 |
| chr10 | 39494650 | 39494750 | 846-Lng-A-T  | 120 | chr10:39494650-39494750 |
| chr10 | 39555750 | 39555850 | 1100-Lng-A-T | 163 | chr10:39555750-39555850 |
| chr10 | 39563650 | 39563750 | 846-Lng-A-T  | 50  | chr10:39563650-39563750 |
| chr10 | 39575350 | 39575450 | 1274-Lng-A-T | 102 | chr10:39575350-39575450 |
| chr10 | 39587950 | 39588050 | 1223-Lng-D-T | 42  | chr10:39587950-39588050 |
| chr10 | 39794250 | 39794350 | 846-Lng-A-T  | 97  | chr10:39794250-39794350 |
| chr10 | 39808150 | 39808250 | 1072-Lng-A-T | 54  | chr10:39808150-39808250 |
| chr10 | 39839450 | 39839550 | 1065-Lng-C-T | 76  | chr10:39839450-39839550 |
| chr10 | 40011250 | 40011350 | 1188-Lng-A-T | 44  | chr10:40011250-40011350 |
| chr10 | 40013150 | 40013250 | 1188-Lng-A-T | 39  | chr10:40013150-40013250 |
| chr10 | 40119650 | 40119750 | 1223-Lng-A-T | 247 | chr10:40119650-40119750 |
| chr10 | 40160150 | 40160250 | 901-Lng-B-T  | 224 | chr10:40160150-40160250 |
| chr10 | 40201050 | 40201150 | 1274-Lng-A-T | 148 | chr10:40201050-40201150 |
| chr10 | 40574050 | 40574150 | 1223-Lng-B-T | 39  | chr10:40574050-40574150 |
| chr10 | 40579350 | 40579450 | 1090-Lng-B-T | 682 | chr10:40579350-40579450 |
| chr10 | 40592350 | 40592450 | 1072-Lng-A-T | 54  | chr10:40592350-40592450 |
| chr10 | 40848350 | 40848450 | 1274-Lng-A-T | 177 | chr10:40848350-40848450 |
| chr10 | 40885150 | 40885250 | 1065-Lng-B-T | 70  | chr10:40885150-40885250 |
| chr10 | 41011150 | 41011250 | 1065-Lng-C-T | 107 | chr10:41011150-41011250 |
| chr10 | 41184850 | 41184950 | 1151-Lng-A-T | 118 | chr10:41184850-41184950 |
| chr10 | 41431750 | 41431850 | 1274-Lng-A-T | 53  | chr10:41431750-41431850 |
| chr10 | 41538950 | 41539050 | 1223-Lng-A-T | 142 | chr10:41538950-41539050 |
| chr10 | 41595150 | 41595250 | 901-Lng-A-T  | 350 | chr10:41595150-41595250 |
| chr10 | 41601050 | 41601150 | 1223-Lng-C-T | 91  | chr10:41601050-41601150 |
| chr10 | 41703250 | 41703350 | 901-Lng-D-T  | 570 | chr10:41703250-41703350 |
| chr10 | 41820050 | 41820150 | 1188-Lng-A-T | 51  | chr10:41820050-41820150 |
| chr10 | 41831650 | 41831750 | 901-Lng-A-T  | 89  | chr10:41831650-41831750 |
| chr10 | 41841450 | 41841550 | 1004-Lng-A-T | 59  | chr10:41841450-41841550 |
| chr10 | 41859150 | 41859250 | 1223-Lng-C-T | 49  | chr10:41859150-41859250 |
| chr10 | 41906550 | 41906650 | 901-Lng-A-T  | 83  | chr10:41906550-41906650 |
| chr10 | 41938750 | 41938850 | 1188-Lng-A-T | 63  | chr10:41938750-41938850 |
| chr10 | 41953550 | 41953650 | 1188-Lng-A-T | 62  | chr10:41953550-41953650 |
| chr10 | 42025050 | 42025150 | 1065-Lng-B-T | 66  | chr10:42025050-42025150 |
| chr10 | 42248750 | 42248850 | 1223-Lng-B-T | 41  | chr10:42248750-42248850 |
| chr10 | 42432650 | 42432750 | 1152-Lng-A-T | 213 | chr10:42432650-42432750 |
| chr10 | 42449550 | 42449650 | 1100-Lng-A-T | 52  | chr10:42449550-42449650 |

**Table S2: SB Insertion regions**

|       |          |          |              |     |                         |
|-------|----------|----------|--------------|-----|-------------------------|
| chr10 | 42506150 | 42506250 | 1223-Lng-C-T | 43  | chr10:42506150-42506250 |
| chr10 | 42517150 | 42517250 | 1090-Lng-B-T | 100 | chr10:42517150-42517250 |
| chr10 | 42537950 | 42538050 | 1100-Lng-A-T | 93  | chr10:42537950-42538050 |
| chr10 | 42841350 | 42841450 | 901-Lng-D-T  | 355 | chr10:42841350-42841450 |
| chr10 | 42911050 | 42911150 | 1004-Lng-A-T | 74  | chr10:42911050-42911150 |
| chr10 | 43173850 | 43173950 | 1223-Lng-B-T | 232 | chr10:43173850-43173950 |
| chr10 | 43202550 | 43202650 | 1065-Lng-B-T | 83  | chr10:43202550-43202650 |
| chr10 | 43382650 | 43382750 | 1065-Lng-A-T | 35  | chr10:43382650-43382750 |
| chr10 | 43421150 | 43421250 | 1152-Lng-A-T | 87  | chr10:43421150-43421250 |
| chr10 | 43629450 | 43629550 | 901-Lng-A-T  | 105 | chr10:43629450-43629550 |
| chr10 | 43985250 | 43985350 | 901-Lng-A-T  | 59  | chr10:43985250-43985350 |
| chr10 | 44048250 | 44048350 | 1223-Lng-C-T | 86  | chr10:44048250-44048350 |
| chr10 | 44091950 | 44092050 | 1090-Lng-A-T | 93  | chr10:44091950-44092050 |
| chr10 | 44166350 | 44166450 | 846-Lng-A-T  | 188 | chr10:44166350-44166450 |
| chr10 | 44169250 | 44169350 | 846-Lng-A-T  | 111 | chr10:44169250-44169350 |
| chr10 | 44232950 | 44233050 | 1065-Lng-B-T | 58  | chr10:44232950-44233050 |
| chr10 | 44293050 | 44293150 | 1152-Lng-A-T | 47  | chr10:44293050-44293150 |
| chr10 | 44294550 | 44294650 | 846-Lng-A-T  | 53  | chr10:44294550-44294650 |
| chr10 | 44427250 | 44427350 | 1072-Lng-A-T | 66  | chr10:44427250-44427350 |
| chr10 | 44763250 | 44763350 | 901-Lng-A-T  | 514 | chr10:44763250-44763350 |
| chr10 | 44844550 | 44844650 | 1151-Lng-A-T | 55  | chr10:44844550-44844650 |
| chr10 | 44873650 | 44873750 | 1090-Lng-A-T | 89  | chr10:44873650-44873750 |
| chr10 | 45381150 | 45381250 | 1065-Lng-B-T | 59  | chr10:45381150-45381250 |
| chr10 | 45581250 | 45581350 | 1223-Lng-A-T | 57  | chr10:45581250-45581350 |
| chr10 | 45813750 | 45813850 | 901-Lng-A-T  | 84  | chr10:45813750-45813850 |
| chr10 | 46178950 | 46179050 | 1072-Lng-A-T | 86  | chr10:46178950-46179050 |
| chr10 | 46238850 | 46238950 | 1065-Lng-B-T | 56  | chr10:46238850-46238950 |
| chr10 | 46293950 | 46294050 | 1151-Lng-A-T | 82  | chr10:46293950-46294050 |
| chr10 | 46552250 | 46552350 | 1223-Lng-A-T | 290 | chr10:46552250-46552350 |
| chr10 | 46620350 | 46620450 | 846-Lng-A-T  | 47  | chr10:46620350-46620450 |
| chr10 | 46771450 | 46771550 | 1274-Lng-A-T | 218 | chr10:46771450-46771550 |
| chr10 | 46816350 | 46816450 | 1090-Lng-A-T | 63  | chr10:46816350-46816450 |
| chr10 | 47177850 | 47177950 | 1223-Lng-D-T | 80  | chr10:47177850-47177950 |
| chr10 | 47230350 | 47230450 | 901-Lng-C-T  | 61  | chr10:47230350-47230450 |
| chr10 | 47451950 | 47452050 | 1167-Lng-A-T | 90  | chr10:47451950-47452050 |
| chr10 | 47544050 | 47544150 | 901-Lng-D-T  | 464 | chr10:47544050-47544150 |
| chr10 | 47635850 | 47635950 | 901-Lng-D-T  | 485 | chr10:47635850-47635950 |
| chr10 | 47644050 | 47644150 | 1065-Lng-A-T | 49  | chr10:47644050-47644150 |
| chr10 | 47855850 | 47855950 | 1100-Lng-A-T | 71  | chr10:47855850-47855950 |
| chr10 | 48009850 | 48009950 | 846-Lng-A-T  | 45  | chr10:48009850-48009950 |
| chr10 | 48251850 | 48251950 | 1188-Lng-A-T | 183 | chr10:48251850-48251950 |
| chr10 | 48594550 | 48594650 | 1090-Lng-B-T | 404 | chr10:48594550-48594650 |
| chr10 | 48670650 | 48670750 | 1100-Lng-A-T | 93  | chr10:48670650-48670750 |
| chr10 | 48929150 | 48929250 | 1004-Lng-A-T | 59  | chr10:48929150-48929250 |
| chr10 | 48975250 | 48975350 | 901-Lng-D-T  | 40  | chr10:48975250-48975350 |
| chr10 | 49097150 | 49097250 | 1065-Lng-B-T | 55  | chr10:49097150-49097250 |

**Table S2: SB Insertion regions**

|       |          |          |              |      |                         |
|-------|----------|----------|--------------|------|-------------------------|
| chr10 | 49134650 | 49134750 | 846-Lng-A-T  | 64   | chr10:49134650-49134750 |
| chr10 | 49195350 | 49195450 | 846-Lng-A-T  | 187  | chr10:49195350-49195450 |
| chr10 | 49204850 | 49204950 | 1223-Lng-D-T | 40   | chr10:49204850-49204950 |
| chr10 | 49435850 | 49435950 | 1065-Lng-A-T | 76   | chr10:49435850-49435950 |
| chr10 | 49436050 | 49436150 | 901-Lng-C-T  | 31   | chr10:49436050-49436150 |
| chr10 | 49488650 | 49488750 | 1065-Lng-A-T | 103  | chr10:49488650-49488750 |
| chr10 | 49636050 | 49636150 | 1100-Lng-A-T | 62   | chr10:49636050-49636150 |
| chr10 | 49712950 | 49713050 | 1152-Lng-A-T | 151  | chr10:49712950-49713050 |
| chr10 | 49956950 | 49957050 | 1004-Lng-A-T | 75   | chr10:49956950-49957050 |
| chr10 | 50000150 | 50000250 | 1100-Lng-A-T | 51   | chr10:50000150-50000250 |
| chr10 | 50048350 | 50048450 | 1065-Lng-B-T | 349  | chr10:50048350-50048450 |
| chr10 | 50414150 | 50414250 | 901-Lng-B-T  | 212  | chr10:50414150-50414250 |
| chr10 | 50428350 | 50428450 | 1223-Lng-C-T | 66   | chr10:50428350-50428450 |
| chr10 | 50448550 | 50448650 | 901-Lng-A-T  | 136  | chr10:50448550-50448650 |
| chr10 | 50502150 | 50502250 | 1151-Lng-A-T | 295  | chr10:50502150-50502250 |
| chr10 | 50521550 | 50521650 | 901-Lng-D-T  | 294  | chr10:50521550-50521650 |
| chr10 | 51179650 | 51179750 | 1065-Lng-B-T | 65   | chr10:51179650-51179750 |
| chr10 | 51337250 | 51337350 | 1223-Lng-C-T | 76   | chr10:51337250-51337350 |
| chr10 | 51647250 | 51647350 | 901-Lng-D-T  | 40   | chr10:51647250-51647350 |
| chr10 | 51670850 | 51670950 | 1065-Lng-C-T | 74   | chr10:51670850-51670950 |
| chr10 | 51813750 | 51813850 | 1223-Lng-D-T | 43   | chr10:51813750-51813850 |
| chr10 | 51910550 | 51910650 | 1065-Lng-C-T | 1927 | chr10:51910550-51910650 |
| chr10 | 51924650 | 51924750 | 1152-Lng-A-T | 70   | chr10:51924650-51924750 |
| chr10 | 52079550 | 52079650 | 1274-Lng-A-T | 80   | chr10:52079550-52079650 |
| chr10 | 52083250 | 52083350 | 1274-Lng-A-T | 150  | chr10:52083250-52083350 |
| chr10 | 52086350 | 52086450 | 1274-Lng-A-T | 724  | chr10:52086350-52086450 |
| chr10 | 52093050 | 52093150 | 1274-Lng-A-T | 2162 | chr10:52093050-52093150 |
| chr10 | 52145150 | 52145250 | 1274-Lng-A-T | 145  | chr10:52145150-52145250 |
| chr10 | 52234350 | 52234450 | 1223-Lng-B-T | 36   | chr10:52234350-52234450 |
| chr10 | 52237050 | 52237150 | 901-Lng-A-T  | 62   | chr10:52237050-52237150 |
| chr10 | 52329850 | 52329950 | 1072-Lng-A-T | 71   | chr10:52329850-52329950 |
| chr10 | 52453750 | 52453850 | 1223-Lng-D-T | 42   | chr10:52453750-52453850 |
| chr10 | 52574950 | 52575050 | 846-Lng-A-T  | 45   | chr10:52574950-52575050 |
| chr10 | 52907250 | 52907350 | 1152-Lng-A-T | 68   | chr10:52907250-52907350 |
| chr10 | 53043750 | 53043850 | 901-Lng-C-T  | 31   | chr10:53043750-53043850 |
| chr10 | 53144550 | 53144650 | 901-Lng-B-T  | 52   | chr10:53144550-53144650 |
| chr10 | 53327850 | 53327950 | 1188-Lng-A-T | 41   | chr10:53327850-53327950 |
| chr10 | 53362150 | 53362250 | 1065-Lng-A-T | 70   | chr10:53362150-53362250 |
| chr10 | 53363450 | 53363550 | 1152-Lng-A-T | 50   | chr10:53363450-53363550 |
| chr10 | 53703850 | 53703950 | 1167-Lng-A-T | 240  | chr10:53703850-53703950 |
| chr10 | 53730550 | 53730650 | 1167-Lng-A-T | 49   | chr10:53730550-53730650 |
| chr10 | 53775550 | 53775650 | 901-Lng-C-T  | 79   | chr10:53775550-53775650 |
| chr10 | 54176750 | 54176850 | 1100-Lng-A-T | 53   | chr10:54176750-54176850 |
| chr10 | 54233550 | 54233650 | 901-Lng-D-T  | 36   | chr10:54233550-54233650 |
| chr10 | 54274150 | 54274250 | 1151-Lng-A-T | 54   | chr10:54274150-54274250 |
| chr10 | 54302350 | 54302450 | 1004-Lng-A-T | 237  | chr10:54302350-54302450 |

**Table S2: SB Insertion regions**

|       |          |          |              |      |                         |
|-------|----------|----------|--------------|------|-------------------------|
| chr10 | 55176750 | 55176850 | 901-Lng-C-T  | 56   | chr10:55176750-55176850 |
| chr10 | 55537550 | 55537650 | 1274-Lng-A-T | 77   | chr10:55537550-55537650 |
| chr10 | 55571650 | 55571750 | 1167-Lng-A-T | 78   | chr10:55571650-55571750 |
| chr10 | 55646850 | 55646950 | 1004-Lng-A-T | 66   | chr10:55646850-55646950 |
| chr10 | 55674850 | 55674950 | 1090-Lng-A-T | 90   | chr10:55674850-55674950 |
| chr10 | 55739850 | 55739950 | 1090-Lng-A-T | 48   | chr10:55739850-55739950 |
| chr10 | 55828550 | 55828650 | 1065-Lng-B-T | 43   | chr10:55828550-55828650 |
| chr10 | 56239150 | 56239250 | 1151-Lng-A-T | 57   | chr10:56239150-56239250 |
| chr10 | 56326150 | 56326250 | 901-Lng-A-T  | 103  | chr10:56326150-56326250 |
| chr10 | 56344950 | 56345050 | 1223-Lng-A-T | 1370 | chr10:56344950-56345050 |
| chr10 | 56486150 | 56486250 | 1152-Lng-A-T | 61   | chr10:56486150-56486250 |
| chr10 | 56508550 | 56508650 | 901-Lng-B-T  | 243  | chr10:56508550-56508650 |
| chr10 | 56670950 | 56671050 | 1274-Lng-A-T | 68   | chr10:56670950-56671050 |
| chr10 | 56676650 | 56676750 | 1100-Lng-B-T | 57   | chr10:56676650-56676750 |
| chr10 | 57242450 | 57242550 | 1004-Lng-A-T | 54   | chr10:57242450-57242550 |
| chr10 | 57249850 | 57249950 | 1274-Lng-A-T | 86   | chr10:57249850-57249950 |
| chr10 | 57294850 | 57294950 | 1072-Lng-A-T | 58   | chr10:57294850-57294950 |
| chr10 | 57318050 | 57318150 | 1188-Lng-A-T | 75   | chr10:57318050-57318150 |
| chr10 | 57318050 | 57318150 | 1100-Lng-A-T | 63   | chr10:57318050-57318150 |
| chr10 | 57318050 | 57318150 | 1223-Lng-B-T | 73   | chr10:57318050-57318150 |
| chr10 | 57318050 | 57318150 | 901-Lng-B-T  | 49   | chr10:57318050-57318150 |
| chr10 | 57318050 | 57318150 | 901-Lng-A-T  | 158  | chr10:57318050-57318150 |
| chr10 | 57318050 | 57318150 | 1223-Lng-D-T | 61   | chr10:57318050-57318150 |
| chr10 | 57318050 | 57318150 | 1065-Lng-B-T | 44   | chr10:57318050-57318150 |
| chr10 | 57318050 | 57318150 | 1152-Lng-A-T | 69   | chr10:57318050-57318150 |
| chr10 | 57318050 | 57318150 | 1065-Lng-C-T | 83   | chr10:57318050-57318150 |
| chr10 | 57318050 | 57318150 | 901-Lng-C-T  | 86   | chr10:57318050-57318150 |
| chr10 | 57318050 | 57318150 | 1072-Lng-A-T | 58   | chr10:57318050-57318150 |
| chr10 | 57342050 | 57342150 | 1167-Lng-A-T | 47   | chr10:57342050-57342150 |
| chr10 | 57343150 | 57343250 | 901-Lng-C-T  | 30   | chr10:57343150-57343250 |
| chr10 | 57365750 | 57365850 | 1072-Lng-A-T | 74   | chr10:57365750-57365850 |
| chr10 | 57429050 | 57429150 | 1274-Lng-A-T | 57   | chr10:57429050-57429150 |
| chr10 | 57449150 | 57449250 | 1100-Lng-A-T | 94   | chr10:57449150-57449250 |
| chr10 | 57558650 | 57558750 | 846-Lng-A-T  | 81   | chr10:57558650-57558750 |
| chr10 | 57719250 | 57719350 | 1100-Lng-A-T | 60   | chr10:57719250-57719350 |
| chr10 | 57748150 | 57748250 | 901-Lng-C-T  | 58   | chr10:57748150-57748250 |
| chr10 | 57768150 | 57768250 | 1188-Lng-A-T | 50   | chr10:57768150-57768250 |
| chr10 | 57822050 | 57822150 | 901-Lng-A-T  | 181  | chr10:57822050-57822150 |
| chr10 | 57850950 | 57851050 | 1065-Lng-B-T | 89   | chr10:57850950-57851050 |
| chr10 | 57864550 | 57864650 | 1072-Lng-A-T | 178  | chr10:57864550-57864650 |
| chr10 | 57921850 | 57921950 | 1167-Lng-A-T | 49   | chr10:57921850-57921950 |
| chr10 | 57933250 | 57933350 | 1151-Lng-A-T | 151  | chr10:57933250-57933350 |
| chr10 | 58071150 | 58071250 | 1223-Lng-B-T | 53   | chr10:58071150-58071250 |
| chr10 | 58125050 | 58125150 | 1223-Lng-B-T | 98   | chr10:58125050-58125150 |
| chr10 | 58162850 | 58162950 | 1223-Lng-A-T | 1627 | chr10:58162850-58162950 |
| chr10 | 58167550 | 58167650 | 901-Lng-C-T  | 89   | chr10:58167550-58167650 |



**Table S2: SB Insertion regions**

|       |          |          |              |     |                         |
|-------|----------|----------|--------------|-----|-------------------------|
| chr10 | 58333950 | 58334050 | 1004-Lng-A-T | 110 | chr10:58333950-58334050 |
| chr10 | 58405450 | 58405550 | 1223-Lng-C-T | 63  | chr10:58405450-58405550 |
| chr10 | 58448250 | 58448350 | 1223-Lng-B-T | 54  | chr10:58448250-58448350 |
| chr10 | 58600750 | 58600850 | 1188-Lng-A-T | 242 | chr10:58600750-58600850 |
| chr10 | 58708550 | 58708650 | 1223-Lng-B-T | 173 | chr10:58708550-58708650 |
| chr10 | 58757650 | 58757750 | 1090-Lng-B-T | 468 | chr10:58757650-58757750 |
| chr10 | 58810350 | 58810450 | 1152-Lng-A-T | 63  | chr10:58810350-58810450 |
| chr10 | 59010550 | 59010650 | 1223-Lng-C-T | 121 | chr10:59010550-59010650 |
| chr10 | 59028350 | 59028450 | 1065-Lng-A-T | 143 | chr10:59028350-59028450 |
| chr10 | 59197850 | 59197950 | 901-Lng-D-T  | 127 | chr10:59197850-59197950 |
| chr10 | 59508050 | 59508150 | 901-Lng-D-T  | 190 | chr10:59508050-59508150 |
| chr10 | 59533150 | 59533250 | 1223-Lng-C-T | 45  | chr10:59533150-59533250 |
| chr10 | 59542550 | 59542650 | 901-Lng-B-T  | 115 | chr10:59542550-59542650 |
| chr10 | 59989950 | 59990050 | 901-Lng-B-T  | 685 | chr10:59989950-59990050 |
| chr10 | 60533050 | 60533150 | 1100-Lng-B-T | 78  | chr10:60533050-60533150 |
| chr10 | 60601550 | 60601650 | 1065-Lng-A-T | 94  | chr10:60601550-60601650 |
| chr10 | 61101950 | 61102050 | 1167-Lng-A-T | 93  | chr10:61101950-61102050 |
| chr10 | 61287450 | 61287550 | 1065-Lng-A-T | 55  | chr10:61287450-61287550 |
| chr10 | 61388150 | 61388250 | 1065-Lng-B-T | 39  | chr10:61388150-61388250 |
| chr10 | 61707850 | 61707950 | 1100-Lng-A-T | 77  | chr10:61707850-61707950 |
| chr10 | 62084950 | 62085050 | 1151-Lng-A-T | 58  | chr10:62084950-62085050 |
| chr10 | 62103250 | 62103350 | 901-Lng-A-T  | 77  | chr10:62103250-62103350 |
| chr10 | 62210150 | 62210250 | 846-Lng-A-T  | 63  | chr10:62210150-62210250 |
| chr10 | 62229450 | 62229550 | 1065-Lng-B-T | 60  | chr10:62229450-62229550 |
| chr10 | 62242350 | 62242450 | 1100-Lng-A-T | 122 | chr10:62242350-62242450 |
| chr10 | 62249550 | 62249650 | 1090-Lng-A-T | 75  | chr10:62249550-62249650 |
| chr10 | 62476150 | 62476250 | 1274-Lng-A-T | 53  | chr10:62476150-62476250 |
| chr10 | 62498750 | 62498850 | 901-Lng-C-T  | 142 | chr10:62498750-62498850 |
| chr10 | 62786050 | 62786150 | 1072-Lng-A-T | 57  | chr10:62786050-62786150 |
| chr10 | 62794750 | 62794850 | 1151-Lng-A-T | 126 | chr10:62794750-62794850 |
| chr10 | 62940450 | 62940550 | 1004-Lng-A-T | 52  | chr10:62940450-62940550 |
| chr10 | 63098350 | 63098450 | 1090-Lng-A-T | 60  | chr10:63098350-63098450 |
| chr10 | 63395650 | 63395750 | 1167-Lng-A-T | 135 | chr10:63395650-63395750 |
| chr10 | 63464150 | 63464250 | 901-Lng-B-T  | 177 | chr10:63464150-63464250 |
| chr10 | 63548250 | 63548350 | 1090-Lng-A-T | 188 | chr10:63548250-63548350 |
| chr10 | 63625150 | 63625250 | 901-Lng-C-T  | 64  | chr10:63625150-63625250 |
| chr10 | 63698850 | 63698950 | 1152-Lng-A-T | 89  | chr10:63698850-63698950 |
| chr10 | 63769550 | 63769650 | 1151-Lng-A-T | 66  | chr10:63769550-63769650 |
| chr10 | 63919150 | 63919250 | 1090-Lng-A-T | 112 | chr10:63919150-63919250 |
| chr10 | 64251750 | 64251850 | 846-Lng-A-T  | 104 | chr10:64251750-64251850 |
| chr10 | 64257250 | 64257350 | 1065-Lng-B-T | 107 | chr10:64257250-64257350 |
| chr10 | 64471450 | 64471550 | 1072-Lng-A-T | 189 | chr10:64471450-64471550 |
| chr10 | 64601650 | 64601750 | 1100-Lng-B-T | 163 | chr10:64601650-64601750 |
| chr10 | 64766750 | 64766850 | 1065-Lng-C-T | 66  | chr10:64766750-64766850 |
| chr10 | 64825250 | 64825350 | 1090-Lng-A-T | 54  | chr10:64825250-64825350 |
| chr10 | 65095650 | 65095750 | 901-Lng-B-T  | 45  | chr10:65095650-65095750 |

**Table S2: SB Insertion regions**

|       |          |          |              |       |                         |
|-------|----------|----------|--------------|-------|-------------------------|
| chr10 | 65158250 | 65158350 | 901-Lng-C-T  | 244   | chr10:65158250-65158350 |
| chr10 | 65431650 | 65431750 | 1274-Lng-A-T | 86    | chr10:65431650-65431750 |
| chr10 | 65574550 | 65574650 | 1065-Lng-C-T | 88    | chr10:65574550-65574650 |
| chr10 | 65729950 | 65730050 | 1072-Lng-A-T | 62    | chr10:65729950-65730050 |
| chr10 | 66005050 | 66005150 | 1065-Lng-B-T | 57    | chr10:66005050-66005150 |
| chr10 | 66213950 | 66214050 | 1072-Lng-A-T | 54    | chr10:66213950-66214050 |
| chr10 | 66359550 | 66359650 | 1065-Lng-C-T | 65    | chr10:66359550-66359650 |
| chr10 | 66475550 | 66475650 | 1188-Lng-A-T | 44    | chr10:66475550-66475650 |
| chr10 | 66495750 | 66495850 | 1065-Lng-B-T | 50    | chr10:66495750-66495850 |
| chr10 | 66549450 | 66549550 | 1188-Lng-A-T | 76    | chr10:66549450-66549550 |
| chr10 | 66562150 | 66562250 | 901-Lng-B-T  | 399   | chr10:66562150-66562250 |
| chr10 | 66584850 | 66584950 | 901-Lng-B-T  | 105   | chr10:66584850-66584950 |
| chr10 | 66644950 | 66645050 | 901-Lng-C-T  | 43    | chr10:66644950-66645050 |
| chr10 | 66654050 | 66654150 | 1152-Lng-A-T | 55    | chr10:66654050-66654150 |
| chr10 | 66676350 | 66676450 | 1188-Lng-A-T | 122   | chr10:66676350-66676450 |
| chr10 | 66690750 | 66690850 | 1100-Lng-A-T | 152   | chr10:66690750-66690850 |
| chr10 | 66704450 | 66704550 | 1152-Lng-A-T | 111   | chr10:66704450-66704550 |
| chr10 | 66710050 | 66710150 | 1274-Lng-A-T | 100   | chr10:66710050-66710150 |
| chr10 | 66715950 | 66716050 | 901-Lng-A-T  | 93    | chr10:66715950-66716050 |
| chr10 | 66722950 | 66723050 | 1065-Lng-B-T | 77    | chr10:66722950-66723050 |
| chr10 | 66730950 | 66731050 | 1090-Lng-A-T | 45    | chr10:66730950-66731050 |
| chr10 | 67010350 | 67010450 | 1274-Lng-A-T | 124   | chr10:67010350-67010450 |
| chr10 | 67055850 | 67055950 | 1065-Lng-B-T | 71    | chr10:67055850-67055950 |
| chr10 | 67460350 | 67460450 | 1151-Lng-A-T | 92    | chr10:67460350-67460450 |
| chr10 | 67510550 | 67510650 | 1065-Lng-C-T | 90    | chr10:67510550-67510650 |
| chr10 | 67603050 | 67603150 | 1100-Lng-A-T | 127   | chr10:67603050-67603150 |
| chr10 | 67613050 | 67613150 | 1100-Lng-A-T | 62    | chr10:67613050-67613150 |
| chr10 | 67613250 | 67613350 | 1188-Lng-A-T | 43    | chr10:67613250-67613350 |
| chr10 | 67614050 | 67614150 | 1223-Lng-C-T | 73    | chr10:67614050-67614150 |
| chr10 | 67869350 | 67869450 | 1004-Lng-A-T | 53    | chr10:67869350-67869450 |
| chr10 | 67875550 | 67875650 | 901-Lng-C-T  | 42    | chr10:67875550-67875650 |
| chr10 | 67898850 | 67898950 | 1090-Lng-A-T | 55    | chr10:67898850-67898950 |
| chr10 | 68323050 | 68323150 | 901-Lng-A-T  | 195   | chr10:68323050-68323150 |
| chr10 | 68363350 | 68363450 | 901-Lng-A-T  | 137   | chr10:68363350-68363450 |
| chr10 | 68681750 | 68681850 | 901-Lng-D-T  | 289   | chr10:68681750-68681850 |
| chr10 | 68689350 | 68689450 | 901-Lng-C-T  | 28    | chr10:68689350-68689450 |
| chr10 | 68884750 | 68884850 | 1167-Lng-A-T | 126   | chr10:68884750-68884850 |
| chr10 | 68931250 | 68931350 | 1188-Lng-A-T | 38    | chr10:68931250-68931350 |
| chr10 | 68947350 | 68947450 | 1090-Lng-A-T | 63    | chr10:68947350-68947450 |
| chr10 | 69052550 | 69052650 | 1100-Lng-A-T | 64    | chr10:69052550-69052650 |
| chr10 | 69052650 | 69052750 | 1100-Lng-B-T | 16079 | chr10:69052650-69052750 |
| chr10 | 69059150 | 69059250 | 1065-Lng-A-T | 78    | chr10:69059150-69059250 |
| chr10 | 69063950 | 69064050 | 901-Lng-C-T  | 37    | chr10:69063950-69064050 |
| chr10 | 69129250 | 69129350 | 1223-Lng-B-T | 251   | chr10:69129250-69129350 |
| chr10 | 69132250 | 69132350 | 1274-Lng-A-T | 245   | chr10:69132250-69132350 |
| chr10 | 69146450 | 69146550 | 1223-Lng-C-T | 49    | chr10:69146450-69146550 |

**Table S2: SB Insertion regions**

|       |          |          |              |     |                         |
|-------|----------|----------|--------------|-----|-------------------------|
| chr10 | 69165250 | 69165350 | 1152-Lng-A-T | 110 | chr10:69165250-69165350 |
| chr10 | 69171450 | 69171550 | 1072-Lng-A-T | 115 | chr10:69171450-69171550 |
| chr10 | 69179050 | 69179150 | 901-Lng-A-T  | 288 | chr10:69179050-69179150 |
| chr10 | 69193650 | 69193750 | 1274-Lng-A-T | 62  | chr10:69193650-69193750 |
| chr10 | 69221850 | 69221950 | 901-Lng-C-T  | 105 | chr10:69221850-69221950 |
| chr10 | 69235450 | 69235550 | 1274-Lng-A-T | 101 | chr10:69235450-69235550 |
| chr10 | 69304650 | 69304750 | 1090-Lng-A-T | 100 | chr10:69304650-69304750 |
| chr10 | 69343850 | 69343950 | 1100-Lng-A-T | 419 | chr10:69343850-69343950 |
| chr10 | 69368150 | 69368250 | 1223-Lng-B-T | 316 | chr10:69368150-69368250 |
| chr10 | 69512350 | 69512450 | 1188-Lng-A-T | 228 | chr10:69512350-69512450 |
| chr10 | 69568050 | 69568150 | 1151-Lng-A-T | 322 | chr10:69568050-69568150 |
| chr10 | 69578850 | 69578950 | 901-Lng-B-T  | 55  | chr10:69578850-69578950 |
| chr10 | 69643850 | 69643950 | 1167-Lng-A-T | 105 | chr10:69643850-69643950 |
| chr10 | 69643950 | 69644050 | 1065-Lng-C-T | 90  | chr10:69643950-69644050 |
| chr10 | 69658950 | 69659050 | 901-Lng-C-T  | 87  | chr10:69658950-69659050 |
| chr10 | 70104450 | 70104550 | 1065-Lng-B-T | 67  | chr10:70104450-70104550 |
| chr10 | 70371150 | 70371250 | 1188-Lng-A-T | 45  | chr10:70371150-70371250 |
| chr10 | 70379950 | 70380050 | 901-Lng-A-T  | 309 | chr10:70379950-70380050 |
| chr10 | 70406550 | 70406650 | 1223-Lng-C-T | 48  | chr10:70406550-70406650 |
| chr10 | 70459350 | 70459450 | 1090-Lng-A-T | 61  | chr10:70459350-70459450 |
| chr10 | 70498650 | 70498750 | 901-Lng-A-T  | 76  | chr10:70498650-70498750 |
| chr10 | 70503250 | 70503350 | 901-Lng-C-T  | 43  | chr10:70503250-70503350 |
| chr10 | 70523150 | 70523250 | 1274-Lng-A-T | 51  | chr10:70523150-70523250 |
| chr10 | 70799450 | 70799550 | 846-Lng-A-T  | 76  | chr10:70799450-70799550 |
| chr10 | 71118350 | 71118450 | 901-Lng-D-T  | 60  | chr10:71118350-71118450 |
| chr10 | 71589750 | 71589850 | 1065-Lng-B-T | 52  | chr10:71589750-71589850 |
| chr10 | 71712050 | 71712150 | 1223-Lng-B-T | 37  | chr10:71712050-71712150 |
| chr10 | 71728450 | 71728550 | 1065-Lng-C-T | 89  | chr10:71728450-71728550 |
| chr10 | 71989750 | 71989850 | 1152-Lng-A-T | 264 | chr10:71989750-71989850 |
| chr10 | 72000150 | 72000250 | 1152-Lng-A-T | 79  | chr10:72000150-72000250 |
| chr10 | 72130850 | 72130950 | 1090-Lng-A-T | 55  | chr10:72130850-72130950 |
| chr10 | 72311150 | 72311250 | 901-Lng-C-T  | 35  | chr10:72311150-72311250 |
| chr10 | 72315750 | 72315850 | 1152-Lng-A-T | 32  | chr10:72315750-72315850 |
| chr10 | 72507250 | 72507350 | 901-Lng-A-T  | 101 | chr10:72507250-72507350 |
| chr10 | 72547950 | 72548050 | 1090-Lng-A-T | 74  | chr10:72547950-72548050 |
| chr10 | 72828050 | 72828150 | 1072-Lng-A-T | 48  | chr10:72828050-72828150 |
| chr10 | 72879350 | 72879450 | 1188-Lng-A-T | 341 | chr10:72879350-72879450 |
| chr10 | 72957350 | 72957450 | 1065-Lng-A-T | 54  | chr10:72957350-72957450 |
| chr10 | 73163250 | 73163350 | 1090-Lng-A-T | 53  | chr10:73163250-73163350 |
| chr10 | 73190350 | 73190450 | 1065-Lng-B-T | 50  | chr10:73190350-73190450 |
| chr10 | 73218050 | 73218150 | 846-Lng-A-T  | 92  | chr10:73218050-73218150 |
| chr10 | 73638250 | 73638350 | 901-Lng-C-T  | 67  | chr10:73638250-73638350 |
| chr10 | 73832350 | 73832450 | 1065-Lng-A-T | 41  | chr10:73832350-73832450 |
| chr10 | 73846250 | 73846350 | 901-Lng-A-T  | 733 | chr10:73846250-73846350 |
| chr10 | 74534750 | 74534850 | 1188-Lng-A-T | 195 | chr10:74534750-74534850 |
| chr10 | 74584350 | 74584450 | 1223-Lng-C-T | 50  | chr10:74584350-74584450 |

**Table S2: SB Insertion regions**

|       |          |          |              |      |                         |
|-------|----------|----------|--------------|------|-------------------------|
| chr10 | 74610050 | 74610150 | 1223-Lng-C-T | 200  | chr10:74610050-74610150 |
| chr10 | 74638750 | 74638850 | 901-Lng-D-T  | 328  | chr10:74638750-74638850 |
| chr10 | 74711050 | 74711150 | 1152-Lng-A-T | 59   | chr10:74711050-74711150 |
| chr10 | 74727950 | 74728050 | 1065-Lng-A-T | 106  | chr10:74727950-74728050 |
| chr10 | 74841550 | 74841650 | 1151-Lng-A-T | 492  | chr10:74841550-74841650 |
| chr10 | 74893550 | 74893650 | 1090-Lng-A-T | 94   | chr10:74893550-74893650 |
| chr10 | 74985150 | 74985250 | 1100-Lng-A-T | 102  | chr10:74985150-74985250 |
| chr10 | 75026250 | 75026350 | 1004-Lng-A-T | 71   | chr10:75026250-75026350 |
| chr10 | 75155950 | 75156050 | 1072-Lng-A-T | 61   | chr10:75155950-75156050 |
| chr10 | 75272750 | 75272850 | 1065-Lng-A-T | 122  | chr10:75272750-75272850 |
| chr10 | 75315550 | 75315650 | 1274-Lng-A-T | 538  | chr10:75315550-75315650 |
| chr10 | 75496250 | 75496350 | 1065-Lng-A-T | 36   | chr10:75496250-75496350 |
| chr10 | 75499850 | 75499950 | 901-Lng-B-T  | 40   | chr10:75499850-75499950 |
| chr10 | 75590550 | 75590650 | 1274-Lng-A-T | 100  | chr10:75590550-75590650 |
| chr10 | 75673150 | 75673250 | 1065-Lng-A-T | 64   | chr10:75673150-75673250 |
| chr10 | 75729550 | 75729650 | 1274-Lng-A-T | 75   | chr10:75729550-75729650 |
| chr10 | 75747350 | 75747450 | 1151-Lng-A-T | 81   | chr10:75747350-75747450 |
| chr10 | 75851150 | 75851250 | 1167-Lng-A-T | 116  | chr10:75851150-75851250 |
| chr10 | 76001250 | 76001350 | 1065-Lng-B-T | 83   | chr10:76001250-76001350 |
| chr10 | 76540150 | 76540250 | 846-Lng-A-T  | 170  | chr10:76540150-76540250 |
| chr10 | 76673650 | 76673750 | 1223-Lng-D-T | 43   | chr10:76673650-76673750 |
| chr10 | 76725650 | 76725750 | 1090-Lng-B-T | 241  | chr10:76725650-76725750 |
| chr10 | 76971950 | 76972050 | 1090-Lng-A-T | 83   | chr10:76971950-76972050 |
| chr10 | 77053750 | 77053850 | 901-Lng-B-T  | 126  | chr10:77053750-77053850 |
| chr10 | 77057350 | 77057450 | 1072-Lng-A-T | 56   | chr10:77057350-77057450 |
| chr10 | 77073650 | 77073750 | 1065-Lng-A-T | 91   | chr10:77073650-77073750 |
| chr10 | 77389150 | 77389250 | 1072-Lng-A-T | 49   | chr10:77389150-77389250 |
| chr10 | 77460550 | 77460650 | 1188-Lng-A-T | 122  | chr10:77460550-77460650 |
| chr10 | 77657750 | 77657850 | 1100-Lng-A-T | 112  | chr10:77657750-77657850 |
| chr10 | 77660550 | 77660650 | 1223-Lng-C-T | 44   | chr10:77660550-77660650 |
| chr10 | 77684850 | 77684950 | 1167-Lng-A-T | 51   | chr10:77684850-77684950 |
| chr10 | 77698350 | 77698450 | 1152-Lng-A-T | 97   | chr10:77698350-77698450 |
| chr10 | 77813750 | 77813850 | 1152-Lng-A-T | 317  | chr10:77813750-77813850 |
| chr10 | 77919050 | 77919150 | 1090-Lng-A-T | 51   | chr10:77919050-77919150 |
| chr10 | 78523250 | 78523350 | 846-Lng-A-T  | 50   | chr10:78523250-78523350 |
| chr10 | 78525750 | 78525850 | 1223-Lng-A-T | 1895 | chr10:78525750-78525850 |
| chr10 | 78633350 | 78633450 | 1223-Lng-B-T | 42   | chr10:78633350-78633450 |
| chr10 | 78838050 | 78838150 | 1004-Lng-A-T | 56   | chr10:78838050-78838150 |
| chr10 | 78848350 | 78848450 | 901-Lng-C-T  | 29   | chr10:78848350-78848450 |
| chr10 | 79164450 | 79164550 | 901-Lng-A-T  | 61   | chr10:79164450-79164550 |
| chr10 | 79331550 | 79331650 | 1167-Lng-A-T | 106  | chr10:79331550-79331650 |
| chr10 | 79412950 | 79413050 | 1188-Lng-A-T | 40   | chr10:79412950-79413050 |
| chr10 | 79546450 | 79546550 | 901-Lng-C-T  | 232  | chr10:79546450-79546550 |
| chr10 | 79640050 | 79640150 | 901-Lng-B-T  | 40   | chr10:79640050-79640150 |
| chr10 | 79773050 | 79773150 | 1274-Lng-A-T | 127  | chr10:79773050-79773150 |
| chr10 | 80090950 | 80091050 | 1100-Lng-A-T | 63   | chr10:80090950-80091050 |

**Table S2: SB Insertion regions**

|       |          |          |              |     |                         |
|-------|----------|----------|--------------|-----|-------------------------|
| chr10 | 80162550 | 80162650 | 1100-Lng-A-T | 58  | chr10:80162550-80162650 |
| chr10 | 80198950 | 80199050 | 1152-Lng-A-T | 79  | chr10:80198950-80199050 |
| chr10 | 80436050 | 80436150 | 1004-Lng-A-T | 71  | chr10:80436050-80436150 |
| chr10 | 80479650 | 80479750 | 1274-Lng-A-T | 67  | chr10:80479650-80479750 |
| chr10 | 80580250 | 80580350 | 1223-Lng-A-T | 130 | chr10:80580250-80580350 |
| chr10 | 81063250 | 81063350 | 1223-Lng-D-T | 83  | chr10:81063250-81063350 |
| chr10 | 81101450 | 81101550 | 1090-Lng-A-T | 100 | chr10:81101450-81101550 |
| chr10 | 81479450 | 81479550 | 1004-Lng-A-T | 93  | chr10:81479450-81479550 |
| chr10 | 81600750 | 81600850 | 1065-Lng-A-T | 78  | chr10:81600750-81600850 |
| chr10 | 81602550 | 81602650 | 1004-Lng-A-T | 83  | chr10:81602550-81602650 |
| chr10 | 81610850 | 81610950 | 1004-Lng-A-T | 158 | chr10:81610850-81610950 |
| chr10 | 81996450 | 81996550 | 901-Lng-C-T  | 52  | chr10:81996450-81996550 |
| chr10 | 82265350 | 82265450 | 1090-Lng-A-T | 48  | chr10:82265350-82265450 |
| chr10 | 82355350 | 82355450 | 1100-Lng-A-T | 51  | chr10:82355350-82355450 |
| chr10 | 82426050 | 82426150 | 1151-Lng-A-T | 88  | chr10:82426050-82426150 |
| chr10 | 82547150 | 82547250 | 1004-Lng-A-T | 59  | chr10:82547150-82547250 |
| chr10 | 82704650 | 82704750 | 1152-Lng-A-T | 95  | chr10:82704650-82704750 |
| chr10 | 82784450 | 82784550 | 846-Lng-A-T  | 46  | chr10:82784450-82784550 |
| chr10 | 82794350 | 82794450 | 1223-Lng-B-T | 57  | chr10:82794350-82794450 |
| chr10 | 83016850 | 83016950 | 1100-Lng-A-T | 88  | chr10:83016850-83016950 |
| chr10 | 83020650 | 83020750 | 1223-Lng-A-T | 176 | chr10:83020650-83020750 |
| chr10 | 83051950 | 83052050 | 1151-Lng-A-T | 57  | chr10:83051950-83052050 |
| chr10 | 83056950 | 83057050 | 1090-Lng-B-T | 176 | chr10:83056950-83057050 |
| chr10 | 83067950 | 83068050 | 1100-Lng-A-T | 63  | chr10:83067950-83068050 |
| chr10 | 83089250 | 83089350 | 1090-Lng-A-T | 71  | chr10:83089250-83089350 |
| chr10 | 83831550 | 83831650 | 901-Lng-C-T  | 48  | chr10:83831550-83831650 |
| chr10 | 84022450 | 84022550 | 1065-Lng-B-T | 56  | chr10:84022450-84022550 |
| chr10 | 84306050 | 84306150 | 846-Lng-A-T  | 57  | chr10:84306050-84306150 |
| chr10 | 84362950 | 84363050 | 1223-Lng-B-T | 41  | chr10:84362950-84363050 |
| chr10 | 84383350 | 84383450 | 1223-Lng-B-T | 34  | chr10:84383350-84383450 |
| chr10 | 84392950 | 84393050 | 1274-Lng-A-T | 70  | chr10:84392950-84393050 |
| chr10 | 84398750 | 84398850 | 1274-Lng-A-T | 193 | chr10:84398750-84398850 |
| chr10 | 84438750 | 84438850 | 901-Lng-C-T  | 75  | chr10:84438750-84438850 |
| chr10 | 84464550 | 84464650 | 1274-Lng-A-T | 154 | chr10:84464550-84464650 |
| chr10 | 84581950 | 84582050 | 1274-Lng-A-T | 57  | chr10:84581950-84582050 |
| chr10 | 84608050 | 84608150 | 1274-Lng-A-T | 97  | chr10:84608050-84608150 |
| chr10 | 84891450 | 84891550 | 1004-Lng-A-T | 127 | chr10:84891450-84891550 |
| chr10 | 84935050 | 84935150 | 1151-Lng-A-T | 66  | chr10:84935050-84935150 |
| chr10 | 85010350 | 85010450 | 1065-Lng-C-T | 86  | chr10:85010350-85010450 |
| chr10 | 85501450 | 85501550 | 846-Lng-A-T  | 68  | chr10:85501450-85501550 |
| chr10 | 85520450 | 85520550 | 1065-Lng-B-T | 68  | chr10:85520450-85520550 |
| chr10 | 85521150 | 85521250 | 1065-Lng-C-T | 144 | chr10:85521150-85521250 |
| chr10 | 85750050 | 85750150 | 1167-Lng-A-T | 45  | chr10:85750050-85750150 |
| chr10 | 85788650 | 85788750 | 1188-Lng-A-T | 40  | chr10:85788650-85788750 |
| chr10 | 85876250 | 85876350 | 1100-Lng-A-T | 57  | chr10:85876250-85876350 |
| chr10 | 86158950 | 86159050 | 1065-Lng-B-T | 87  | chr10:86158950-86159050 |

**Table S2: SB Insertion regions**

|       |          |          |              |      |                         |
|-------|----------|----------|--------------|------|-------------------------|
| chr10 | 86204150 | 86204250 | 1065-Lng-A-T | 49   | chr10:86204150-86204250 |
| chr10 | 86256950 | 86257050 | 1274-Lng-A-T | 74   | chr10:86256950-86257050 |
| chr10 | 86293350 | 86293450 | 1004-Lng-A-T | 50   | chr10:86293350-86293450 |
| chr10 | 86390950 | 86391050 | 1100-Lng-A-T | 91   | chr10:86390950-86391050 |
| chr10 | 86510850 | 86510950 | 1090-Lng-A-T | 98   | chr10:86510850-86510950 |
| chr10 | 86644750 | 86644850 | 901-Lng-A-T  | 68   | chr10:86644750-86644850 |
| chr10 | 86742650 | 86742750 | 1004-Lng-A-T | 73   | chr10:86742650-86742750 |
| chr10 | 86777250 | 86777350 | 1065-Lng-B-T | 60   | chr10:86777250-86777350 |
| chr10 | 86789250 | 86789350 | 1223-Lng-C-T | 51   | chr10:86789250-86789350 |
| chr10 | 86847850 | 86847950 | 901-Lng-C-T  | 43   | chr10:86847850-86847950 |
| chr10 | 87630850 | 87630950 | 1090-Lng-A-T | 73   | chr10:87630850-87630950 |
| chr10 | 87729450 | 87729550 | 1223-Lng-A-T | 61   | chr10:87729450-87729550 |
| chr10 | 87769250 | 87769350 | 1004-Lng-A-T | 101  | chr10:87769250-87769350 |
| chr10 | 87780350 | 87780450 | 1223-Lng-B-T | 2468 | chr10:87780350-87780450 |
| chr10 | 87811750 | 87811850 | 901-Lng-A-T  | 70   | chr10:87811750-87811850 |
| chr10 | 87864750 | 87864850 | 1090-Lng-A-T | 99   | chr10:87864750-87864850 |
| chr10 | 88539650 | 88539750 | 1152-Lng-A-T | 50   | chr10:88539650-88539750 |
| chr10 | 88605550 | 88605650 | 1223-Lng-C-T | 54   | chr10:88605550-88605650 |
| chr10 | 88937950 | 88938050 | 1152-Lng-A-T | 140  | chr10:88937950-88938050 |
| chr10 | 89097050 | 89097150 | 1274-Lng-A-T | 129  | chr10:89097050-89097150 |
| chr10 | 89118750 | 89118850 | 1152-Lng-A-T | 54   | chr10:89118750-89118850 |
| chr10 | 89136550 | 89136650 | 901-Lng-A-T  | 71   | chr10:89136550-89136650 |
| chr10 | 89138450 | 89138550 | 1167-Lng-A-T | 104  | chr10:89138450-89138550 |
| chr10 | 89143950 | 89144050 | 1223-Lng-C-T | 51   | chr10:89143950-89144050 |
| chr10 | 89189650 | 89189750 | 1065-Lng-B-T | 43   | chr10:89189650-89189750 |
| chr10 | 89285050 | 89285150 | 901-Lng-B-T  | 129  | chr10:89285050-89285150 |
| chr10 | 89291250 | 89291350 | 1188-Lng-A-T | 107  | chr10:89291250-89291350 |
| chr10 | 89962450 | 89962550 | 846-Lng-A-T  | 271  | chr10:89962450-89962550 |
| chr10 | 89973050 | 89973150 | 1152-Lng-A-T | 84   | chr10:89973050-89973150 |
| chr10 | 90123450 | 90123550 | 1274-Lng-A-T | 68   | chr10:90123450-90123550 |
| chr10 | 90612350 | 90612450 | 901-Lng-C-T  | 81   | chr10:90612350-90612450 |
| chr10 | 90627650 | 90627750 | 1065-Lng-B-T | 87   | chr10:90627650-90627750 |
| chr10 | 90701750 | 90701850 | 1223-Lng-B-T | 44   | chr10:90701750-90701850 |
| chr10 | 91463550 | 91463650 | 1072-Lng-A-T | 77   | chr10:91463550-91463650 |
| chr10 | 91483350 | 91483450 | 1223-Lng-B-T | 264  | chr10:91483350-91483450 |
| chr10 | 91587850 | 91587950 | 1223-Lng-A-T | 956  | chr10:91587850-91587950 |
| chr10 | 91874850 | 91874950 | 1072-Lng-A-T | 48   | chr10:91874850-91874950 |
| chr10 | 91972250 | 91972350 | 1223-Lng-B-T | 38   | chr10:91972250-91972350 |
| chr10 | 92016150 | 92016250 | 1274-Lng-A-T | 131  | chr10:92016150-92016250 |
| chr10 | 92327050 | 92327150 | 1072-Lng-A-T | 78   | chr10:92327050-92327150 |
| chr10 | 92359650 | 92359750 | 901-Lng-C-T  | 35   | chr10:92359650-92359750 |
| chr10 | 92439150 | 92439250 | 1274-Lng-A-T | 49   | chr10:92439150-92439250 |
| chr10 | 92681050 | 92681150 | 1004-Lng-A-T | 71   | chr10:92681050-92681150 |
| chr10 | 92690050 | 92690150 | 1151-Lng-A-T | 82   | chr10:92690050-92690150 |
| chr10 | 92693750 | 92693850 | 1065-Lng-C-T | 962  | chr10:92693750-92693850 |
| chr10 | 92789750 | 92789850 | 901-Lng-A-T  | 73   | chr10:92789750-92789850 |

**Table S2: SB Insertion regions**

|       |          |          |              |      |                         |
|-------|----------|----------|--------------|------|-------------------------|
| chr10 | 92898750 | 92898850 | 1223-Lng-B-T | 41   | chr10:92898750-92898850 |
| chr10 | 92975250 | 92975350 | 1274-Lng-A-T | 64   | chr10:92975250-92975350 |
| chr10 | 92988850 | 92988950 | 901-Lng-A-T  | 102  | chr10:92988850-92988950 |
| chr10 | 93116250 | 93116350 | 1274-Lng-A-T | 65   | chr10:93116250-93116350 |
| chr10 | 93134950 | 93135050 | 1151-Lng-A-T | 934  | chr10:93134950-93135050 |
| chr10 | 93161150 | 93161250 | 1223-Lng-D-T | 62   | chr10:93161150-93161250 |
| chr10 | 93161250 | 93161350 | 1223-Lng-D-T | 168  | chr10:93161250-93161350 |
| chr10 | 93214650 | 93214750 | 1065-Lng-B-T | 88   | chr10:93214650-93214750 |
| chr10 | 93513650 | 93513750 | 901-Lng-B-T  | 174  | chr10:93513650-93513750 |
| chr10 | 93518250 | 93518350 | 1188-Lng-A-T | 126  | chr10:93518250-93518350 |
| chr10 | 93538050 | 93538150 | 1223-Lng-B-T | 72   | chr10:93538050-93538150 |
| chr10 | 93561950 | 93562050 | 901-Lng-C-T  | 70   | chr10:93561950-93562050 |
| chr10 | 93785750 | 93785850 | 846-Lng-A-T  | 133  | chr10:93785750-93785850 |
| chr10 | 94378650 | 94378750 | 1223-Lng-B-T | 45   | chr10:94378650-94378750 |
| chr10 | 94392750 | 94392850 | 1151-Lng-A-T | 78   | chr10:94392750-94392850 |
| chr10 | 94494550 | 94494650 | 1065-Lng-A-T | 99   | chr10:94494550-94494650 |
| chr10 | 94667250 | 94667350 | 1100-Lng-A-T | 120  | chr10:94667250-94667350 |
| chr10 | 94680150 | 94680250 | 846-Lng-A-T  | 89   | chr10:94680150-94680250 |
| chr10 | 94732350 | 94732450 | 1100-Lng-A-T | 100  | chr10:94732350-94732450 |
| chr10 | 94735850 | 94735950 | 1072-Lng-A-T | 49   | chr10:94735850-94735950 |
| chr10 | 94744850 | 94744950 | 1065-Lng-A-T | 46   | chr10:94744850-94744950 |
| chr10 | 94985050 | 94985150 | 1004-Lng-A-T | 55   | chr10:94985050-94985150 |
| chr10 | 95000650 | 95000750 | 901-Lng-D-T  | 91   | chr10:95000650-95000750 |
| chr10 | 95010250 | 95010350 | 1274-Lng-A-T | 59   | chr10:95010250-95010350 |
| chr10 | 95033050 | 95033150 | 1274-Lng-A-T | 55   | chr10:95033050-95033150 |
| chr10 | 95242250 | 95242350 | 1152-Lng-A-T | 74   | chr10:95242250-95242350 |
| chr10 | 95279950 | 95280050 | 1004-Lng-A-T | 119  | chr10:95279950-95280050 |
| chr10 | 95443150 | 95443250 | 1223-Lng-A-T | 1505 | chr10:95443150-95443250 |
| chr10 | 95443450 | 95443550 | 1072-Lng-A-T | 48   | chr10:95443450-95443550 |
| chr10 | 95904950 | 95905050 | 1151-Lng-A-T | 244  | chr10:95904950-95905050 |
| chr10 | 96020550 | 96020650 | 1065-Lng-C-T | 64   | chr10:96020550-96020650 |
| chr10 | 96056250 | 96056350 | 1223-Lng-A-T | 235  | chr10:96056250-96056350 |
| chr10 | 96664050 | 96664150 | 1223-Lng-D-T | 48   | chr10:96664050-96664150 |
| chr10 | 96822350 | 96822450 | 1152-Lng-A-T | 337  | chr10:96822350-96822450 |
| chr10 | 96931550 | 96931650 | 1223-Lng-A-T | 102  | chr10:96931550-96931650 |
| chr10 | 96974350 | 96974450 | 846-Lng-A-T  | 94   | chr10:96974350-96974450 |
| chr10 | 97135650 | 97135750 | 1072-Lng-A-T | 53   | chr10:97135650-97135750 |
| chr10 | 97246550 | 97246650 | 1188-Lng-A-T | 40   | chr10:97246550-97246650 |
| chr10 | 98253150 | 98253250 | 1274-Lng-A-T | 62   | chr10:98253150-98253250 |
| chr10 | 98309650 | 98309750 | 1072-Lng-A-T | 55   | chr10:98309650-98309750 |
| chr10 | 98357450 | 98357550 | 901-Lng-A-T  | 86   | chr10:98357450-98357550 |
| chr10 | 98395450 | 98395550 | 901-Lng-A-T  | 95   | chr10:98395450-98395550 |
| chr10 | 98411950 | 98412050 | 1188-Lng-A-T | 363  | chr10:98411950-98412050 |
| chr10 | 98419150 | 98419250 | 901-Lng-C-T  | 38   | chr10:98419150-98419250 |
| chr10 | 98450650 | 98450750 | 1065-Lng-B-T | 75   | chr10:98450650-98450750 |
| chr10 | 98456850 | 98456950 | 901-Lng-D-T  | 478  | chr10:98456850-98456950 |

**Table S2: SB Insertion regions**

|       |           |           |              |     |                           |
|-------|-----------|-----------|--------------|-----|---------------------------|
| chr10 | 98602150  | 98602250  | 1090-Lng-A-T | 87  | chr10:98602150-98602250   |
| chr10 | 98653350  | 98653450  | 901-Lng-D-T  | 39  | chr10:98653350-98653450   |
| chr10 | 98717650  | 98717750  | 1274-Lng-A-T | 97  | chr10:98717650-98717750   |
| chr10 | 98873850  | 98873950  | 1065-Lng-B-T | 44  | chr10:98873850-98873950   |
| chr10 | 98998750  | 98998850  | 901-Lng-B-T  | 299 | chr10:98998750-98998850   |
| chr10 | 99024550  | 99024650  | 901-Lng-A-T  | 127 | chr10:99024550-99024650   |
| chr10 | 99083650  | 99083750  | 1223-Lng-B-T | 82  | chr10:99083650-99083750   |
| chr10 | 99337750  | 99337850  | 1223-Lng-B-T | 160 | chr10:99337750-99337850   |
| chr10 | 100395250 | 100395350 | 1090-Lng-A-T | 77  | chr10:100395250-100395350 |
| chr10 | 100431850 | 100431950 | 1274-Lng-A-T | 86  | chr10:100431850-100431950 |
| chr10 | 100654150 | 100654250 | 1065-Lng-B-T | 45  | chr10:100654150-100654250 |
| chr10 | 100815450 | 100815550 | 1167-Lng-A-T | 79  | chr10:100815450-100815550 |
| chr10 | 100845550 | 100845650 | 901-Lng-B-T  | 250 | chr10:100845550-100845650 |
| chr10 | 101125250 | 101125350 | 1065-Lng-B-T | 52  | chr10:101125250-101125350 |
| chr10 | 101367150 | 101367250 | 1004-Lng-A-T | 56  | chr10:101367150-101367250 |
| chr10 | 101445250 | 101445350 | 901-Lng-A-T  | 57  | chr10:101445250-101445350 |
| chr10 | 101488250 | 101488350 | 1090-Lng-B-T | 608 | chr10:101488250-101488350 |
| chr10 | 101587250 | 101587350 | 901-Lng-C-T  | 59  | chr10:101587250-101587350 |
| chr10 | 101751150 | 101751250 | 1152-Lng-A-T | 56  | chr10:101751150-101751250 |
| chr10 | 101826450 | 101826550 | 901-Lng-B-T  | 90  | chr10:101826450-101826550 |
| chr10 | 102015650 | 102015750 | 1223-Lng-D-T | 51  | chr10:102015650-102015750 |
| chr10 | 102060750 | 102060850 | 1065-Lng-B-T | 73  | chr10:102060750-102060850 |
| chr10 | 102191350 | 102191450 | 901-Lng-D-T  | 321 | chr10:102191350-102191450 |
| chr10 | 102346550 | 102346650 | 1072-Lng-A-T | 50  | chr10:102346550-102346650 |
| chr10 | 102415050 | 102415150 | 1188-Lng-A-T | 75  | chr10:102415050-102415150 |
| chr10 | 102448650 | 102448750 | 901-Lng-C-T  | 51  | chr10:102448650-102448750 |
| chr10 | 102823450 | 102823550 | 1223-Lng-B-T | 57  | chr10:102823450-102823550 |
| chr10 | 102854150 | 102854250 | 901-Lng-A-T  | 55  | chr10:102854150-102854250 |
| chr10 | 102925450 | 102925550 | 1223-Lng-C-T | 63  | chr10:102925450-102925550 |
| chr10 | 103438050 | 103438150 | 1072-Lng-A-T | 138 | chr10:103438050-103438150 |
| chr10 | 103648050 | 103648150 | 1188-Lng-A-T | 65  | chr10:103648050-103648150 |
| chr10 | 103786850 | 103786950 | 1151-Lng-A-T | 131 | chr10:103786850-103786950 |
| chr10 | 103805650 | 103805750 | 1151-Lng-A-T | 82  | chr10:103805650-103805750 |
| chr10 | 103888250 | 103888350 | 1151-Lng-A-T | 55  | chr10:103888250-103888350 |
| chr10 | 103968650 | 103968750 | 846-Lng-A-T  | 146 | chr10:103968650-103968750 |
| chr10 | 104159850 | 104159950 | 1223-Lng-B-T | 333 | chr10:104159850-104159950 |
| chr10 | 104251150 | 104251250 | 1223-Lng-C-T | 54  | chr10:104251150-104251250 |
| chr10 | 104455250 | 104455350 | 1072-Lng-A-T | 246 | chr10:104455250-104455350 |
| chr10 | 104624950 | 104625050 | 1223-Lng-B-T | 44  | chr10:104624950-104625050 |
| chr10 | 104649850 | 104649950 | 901-Lng-A-T  | 76  | chr10:104649850-104649950 |
| chr10 | 104668050 | 104668150 | 901-Lng-A-T  | 107 | chr10:104668050-104668150 |
| chr10 | 104678450 | 104678550 | 1152-Lng-A-T | 228 | chr10:104678450-104678550 |
| chr10 | 104803250 | 104803350 | 1151-Lng-A-T | 57  | chr10:104803250-104803350 |
| chr10 | 104845250 | 104845350 | 846-Lng-A-T  | 59  | chr10:104845250-104845350 |
| chr10 | 104954350 | 104954450 | 1004-Lng-A-T | 63  | chr10:104954350-104954450 |
| chr10 | 104960750 | 104960850 | 1167-Lng-A-T | 226 | chr10:104960750-104960850 |



**Table S2: SB Insertion regions**

|       |           |           |              |     |                           |
|-------|-----------|-----------|--------------|-----|---------------------------|
| chr10 | 104981850 | 104981950 | 1100-Lng-A-T | 67  | chr10:104981850-104981950 |
| chr10 | 105006550 | 105006650 | 901-Lng-B-T  | 71  | chr10:105006550-105006650 |
| chr10 | 105140050 | 105140150 | 1004-Lng-A-T | 73  | chr10:105140050-105140150 |
| chr10 | 105187250 | 105187350 | 1065-Lng-A-T | 48  | chr10:105187250-105187350 |
| chr10 | 105365850 | 105365950 | 1072-Lng-A-T | 53  | chr10:105365850-105365950 |
| chr10 | 105424450 | 105424550 | 901-Lng-D-T  | 83  | chr10:105424450-105424550 |
| chr10 | 105442450 | 105442550 | 1152-Lng-A-T | 331 | chr10:105442450-105442550 |
| chr10 | 105641950 | 105642050 | 1274-Lng-A-T | 64  | chr10:105641950-105642050 |
| chr10 | 105727250 | 105727350 | 901-Lng-A-T  | 62  | chr10:105727250-105727350 |
| chr10 | 105763750 | 105763850 | 1065-Lng-A-T | 59  | chr10:105763750-105763850 |
| chr10 | 106001350 | 106001450 | 1090-Lng-B-T | 686 | chr10:106001350-106001450 |
| chr10 | 106262250 | 106262350 | 846-Lng-A-T  | 116 | chr10:106262250-106262350 |
| chr10 | 106350350 | 106350450 | 901-Lng-A-T  | 99  | chr10:106350350-106350450 |
| chr10 | 106485250 | 106485350 | 1065-Lng-A-T | 489 | chr10:106485250-106485350 |
| chr10 | 106496250 | 106496350 | 901-Lng-B-T  | 53  | chr10:106496250-106496350 |
| chr10 | 107082050 | 107082150 | 901-Lng-C-T  | 56  | chr10:107082050-107082150 |
| chr10 | 107083050 | 107083150 | 1065-Lng-C-T | 86  | chr10:107083050-107083150 |
| chr10 | 107212350 | 107212450 | 1152-Lng-A-T | 56  | chr10:107212350-107212450 |
| chr10 | 107238150 | 107238250 | 901-Lng-A-T  | 56  | chr10:107238150-107238250 |
| chr10 | 107609650 | 107609750 | 1274-Lng-A-T | 60  | chr10:107609650-107609750 |
| chr10 | 107640350 | 107640450 | 1065-Lng-A-T | 60  | chr10:107640350-107640450 |
| chr10 | 107667050 | 107667150 | 1152-Lng-A-T | 87  | chr10:107667050-107667150 |
| chr10 | 107691450 | 107691550 | 901-Lng-D-T  | 355 | chr10:107691450-107691550 |
| chr10 | 107716650 | 107716750 | 1274-Lng-A-T | 57  | chr10:107716650-107716750 |
| chr10 | 107787350 | 107787450 | 1100-Lng-A-T | 124 | chr10:107787350-107787450 |
| chr10 | 108145250 | 108145350 | 901-Lng-B-T  | 75  | chr10:108145250-108145350 |
| chr10 | 108328750 | 108328850 | 1065-Lng-C-T | 79  | chr10:108328750-108328850 |
| chr10 | 108345050 | 108345150 | 1151-Lng-A-T | 298 | chr10:108345050-108345150 |
| chr10 | 108456050 | 108456150 | 901-Lng-B-T  | 63  | chr10:108456050-108456150 |
| chr10 | 108467550 | 108467650 | 901-Lng-A-T  | 178 | chr10:108467550-108467650 |
| chr10 | 108533550 | 108533650 | 901-Lng-D-T  | 283 | chr10:108533550-108533650 |
| chr10 | 108637950 | 108638050 | 901-Lng-D-T  | 173 | chr10:108637950-108638050 |
| chr10 | 108891350 | 108891450 | 901-Lng-B-T  | 39  | chr10:108891350-108891450 |
| chr10 | 109201250 | 109201350 | 1274-Lng-A-T | 51  | chr10:109201250-109201350 |
| chr10 | 109237250 | 109237350 | 901-Lng-C-T  | 33  | chr10:109237250-109237350 |
| chr10 | 109353050 | 109353150 | 1223-Lng-A-T | 207 | chr10:109353050-109353150 |
| chr10 | 109502750 | 109502850 | 1090-Lng-A-T | 98  | chr10:109502750-109502850 |
| chr10 | 109609050 | 109609150 | 1188-Lng-A-T | 36  | chr10:109609050-109609150 |
| chr10 | 109673250 | 109673350 | 1065-Lng-B-T | 62  | chr10:109673250-109673350 |
| chr10 | 109724850 | 109724950 | 1065-Lng-A-T | 54  | chr10:109724850-109724950 |
| chr10 | 109753750 | 109753850 | 1004-Lng-A-T | 58  | chr10:109753750-109753850 |
| chr10 | 109886150 | 109886250 | 1004-Lng-A-T | 132 | chr10:109886150-109886250 |
| chr10 | 109914650 | 109914750 | 1072-Lng-A-T | 322 | chr10:109914650-109914750 |
| chr10 | 110020150 | 110020250 | 1151-Lng-A-T | 91  | chr10:110020150-110020250 |
| chr10 | 110195850 | 110195950 | 1223-Lng-A-T | 127 | chr10:110195850-110195950 |
| chr10 | 110323650 | 110323750 | 1072-Lng-A-T | 102 | chr10:110323650-110323750 |

**Table S2: SB Insertion regions**

|       |           |           |              |      |                           |
|-------|-----------|-----------|--------------|------|---------------------------|
| chr10 | 110395750 | 110395850 | 846-Lng-A-T  | 86   | chr10:110395750-110395850 |
| chr10 | 110405950 | 110406050 | 1151-Lng-A-T | 56   | chr10:110405950-110406050 |
| chr10 | 110421650 | 110421750 | 1004-Lng-A-T | 80   | chr10:110421650-110421750 |
| chr10 | 110485150 | 110485250 | 1065-Lng-B-T | 91   | chr10:110485150-110485250 |
| chr10 | 110502250 | 110502350 | 901-Lng-A-T  | 77   | chr10:110502250-110502350 |
| chr10 | 110672950 | 110673050 | 1065-Lng-C-T | 66   | chr10:110672950-110673050 |
| chr10 | 110920850 | 110920950 | 901-Lng-A-T  | 51   | chr10:110920850-110920950 |
| chr10 | 110926250 | 110926350 | 1223-Lng-A-T | 80   | chr10:110926250-110926350 |
| chr10 | 110935850 | 110935950 | 1223-Lng-D-T | 58   | chr10:110935850-110935950 |
| chr10 | 111094250 | 111094350 | 1004-Lng-A-T | 97   | chr10:111094250-111094350 |
| chr10 | 111164950 | 111165050 | 1100-Lng-B-T | 74   | chr10:111164950-111165050 |
| chr10 | 111421150 | 111421250 | 1151-Lng-A-T | 57   | chr10:111421150-111421250 |
| chr10 | 111426350 | 111426450 | 901-Lng-B-T  | 235  | chr10:111426350-111426450 |
| chr10 | 111614050 | 111614150 | 1090-Lng-B-T | 414  | chr10:111614050-111614150 |
| chr10 | 111657550 | 111657650 | 1152-Lng-A-T | 132  | chr10:111657550-111657650 |
| chr10 | 111789050 | 111789150 | 1223-Lng-C-T | 55   | chr10:111789050-111789150 |
| chr10 | 111790550 | 111790650 | 846-Lng-A-T  | 59   | chr10:111790550-111790650 |
| chr10 | 112108450 | 112108550 | 1065-Lng-B-T | 48   | chr10:112108450-112108550 |
| chr10 | 112189350 | 112189450 | 1090-Lng-A-T | 59   | chr10:112189350-112189450 |
| chr10 | 112264450 | 112264550 | 1072-Lng-A-T | 54   | chr10:112264450-112264550 |
| chr10 | 112363450 | 112363550 | 1072-Lng-A-T | 58   | chr10:112363450-112363550 |
| chr10 | 112367650 | 112367750 | 1090-Lng-A-T | 99   | chr10:112367650-112367750 |
| chr10 | 112385150 | 112385250 | 1090-Lng-A-T | 74   | chr10:112385150-112385250 |
| chr10 | 112683450 | 112683550 | 901-Lng-C-T  | 66   | chr10:112683450-112683550 |
| chr10 | 112732450 | 112732550 | 1151-Lng-A-T | 222  | chr10:112732450-112732550 |
| chr10 | 113089950 | 113090050 | 1223-Lng-B-T | 310  | chr10:113089950-113090050 |
| chr10 | 113645050 | 113645150 | 1100-Lng-A-T | 54   | chr10:113645050-113645150 |
| chr10 | 113734450 | 113734550 | 1004-Lng-A-T | 74   | chr10:113734450-113734550 |
| chr10 | 113791750 | 113791850 | 1072-Lng-A-T | 53   | chr10:113791750-113791850 |
| chr10 | 113841950 | 113842050 | 1151-Lng-A-T | 180  | chr10:113841950-113842050 |
| chr10 | 114106950 | 114107050 | 1100-Lng-A-T | 141  | chr10:114106950-114107050 |
| chr10 | 114250450 | 114250550 | 1223-Lng-C-T | 47   | chr10:114250450-114250550 |
| chr10 | 114263850 | 114263950 | 901-Lng-B-T  | 242  | chr10:114263850-114263950 |
| chr10 | 114363750 | 114363850 | 1151-Lng-A-T | 54   | chr10:114363750-114363850 |
| chr10 | 114430850 | 114430950 | 901-Lng-C-T  | 62   | chr10:114430850-114430950 |
| chr10 | 114432550 | 114432650 | 901-Lng-C-T  | 46   | chr10:114432550-114432650 |
| chr10 | 114498550 | 114498650 | 1274-Lng-A-T | 95   | chr10:114498550-114498650 |
| chr10 | 114608050 | 114608150 | 1274-Lng-A-T | 116  | chr10:114608050-114608150 |
| chr10 | 114671850 | 114671950 | 1100-Lng-B-T | 5364 | chr10:114671850-114671950 |
| chr10 | 114680750 | 114680850 | 1188-Lng-A-T | 35   | chr10:114680750-114680850 |
| chr10 | 114736950 | 114737050 | 1090-Lng-A-T | 51   | chr10:114736950-114737050 |
| chr10 | 114824450 | 114824550 | 1151-Lng-A-T | 64   | chr10:114824450-114824550 |
| chr10 | 114836450 | 114836550 | 1151-Lng-A-T | 54   | chr10:114836450-114836550 |
| chr10 | 114863450 | 114863550 | 1065-Lng-A-T | 69   | chr10:114863450-114863550 |
| chr10 | 115246850 | 115246950 | 846-Lng-A-T  | 62   | chr10:115246850-115246950 |
| chr10 | 115257950 | 115258050 | 1223-Lng-C-T | 130  | chr10:115257950-115258050 |

**Table S2: SB Insertion regions**

|       |           |           |              |      |                           |
|-------|-----------|-----------|--------------|------|---------------------------|
| chr10 | 115498350 | 115498450 | 1004-Lng-A-T | 81   | chr10:115498350-115498450 |
| chr10 | 115973150 | 115973250 | 901-Lng-C-T  | 44   | chr10:115973150-115973250 |
| chr10 | 115976850 | 115976950 | 1223-Lng-B-T | 62   | chr10:115976850-115976950 |
| chr10 | 115977050 | 115977150 | 1072-Lng-A-T | 53   | chr10:115977050-115977150 |
| chr10 | 115987450 | 115987550 | 1274-Lng-A-T | 61   | chr10:115987450-115987550 |
| chr10 | 115989650 | 115989750 | 1223-Lng-C-T | 44   | chr10:115989650-115989750 |
| chr10 | 116003950 | 116004050 | 1090-Lng-A-T | 699  | chr10:116003950-116004050 |
| chr10 | 116193750 | 116193850 | 1065-Lng-B-T | 467  | chr10:116193750-116193850 |
| chr10 | 116219650 | 116219750 | 901-Lng-C-T  | 45   | chr10:116219650-116219750 |
| chr10 | 116488950 | 116489050 | 1223-Lng-B-T | 161  | chr10:116488950-116489050 |
| chr10 | 116529350 | 116529450 | 1065-Lng-A-T | 370  | chr10:116529350-116529450 |
| chr10 | 116548050 | 116548150 | 1274-Lng-A-T | 63   | chr10:116548050-116548150 |
| chr10 | 116809950 | 116810050 | 1274-Lng-A-T | 73   | chr10:116809950-116810050 |
| chr10 | 116830250 | 116830350 | 1090-Lng-B-T | 907  | chr10:116830250-116830350 |
| chr10 | 117029150 | 117029250 | 901-Lng-D-T  | 130  | chr10:117029150-117029250 |
| chr10 | 117109650 | 117109750 | 1065-Lng-A-T | 1216 | chr10:117109650-117109750 |
| chr10 | 117252150 | 117252250 | 901-Lng-C-T  | 30   | chr10:117252150-117252250 |
| chr10 | 117353550 | 117353650 | 1167-Lng-A-T | 794  | chr10:117353550-117353650 |
| chr10 | 117387950 | 117388050 | 1072-Lng-A-T | 68   | chr10:117387950-117388050 |
| chr10 | 117529050 | 117529150 | 901-Lng-A-T  | 50   | chr10:117529050-117529150 |
| chr10 | 117686050 | 117686150 | 901-Lng-A-T  | 79   | chr10:117686050-117686150 |
| chr10 | 117988350 | 117988450 | 901-Lng-B-T  | 309  | chr10:117988350-117988450 |
| chr10 | 118160550 | 118160650 | 1065-Lng-A-T | 45   | chr10:118160550-118160650 |
| chr10 | 118167350 | 118167450 | 1065-Lng-A-T | 106  | chr10:118167350-118167450 |
| chr10 | 118299350 | 118299450 | 1223-Lng-B-T | 48   | chr10:118299350-118299450 |
| chr10 | 118321950 | 118322050 | 1274-Lng-A-T | 174  | chr10:118321950-118322050 |
| chr10 | 118391150 | 118391250 | 1274-Lng-A-T | 64   | chr10:118391150-118391250 |
| chr10 | 118643450 | 118643550 | 1223-Lng-A-T | 100  | chr10:118643450-118643550 |
| chr10 | 118669850 | 118669950 | 1274-Lng-A-T | 144  | chr10:118669850-118669950 |
| chr10 | 118675450 | 118675550 | 1167-Lng-A-T | 93   | chr10:118675450-118675550 |
| chr10 | 118689750 | 118689850 | 1072-Lng-A-T | 54   | chr10:118689750-118689850 |
| chr10 | 118808250 | 118808350 | 901-Lng-C-T  | 66   | chr10:118808250-118808350 |
| chr10 | 119035750 | 119035850 | 1065-Lng-C-T | 70   | chr10:119035750-119035850 |
| chr10 | 119322650 | 119322750 | 1167-Lng-A-T | 149  | chr10:119322650-119322750 |
| chr10 | 119643350 | 119643450 | 1223-Lng-C-T | 50   | chr10:119643350-119643450 |
| chr10 | 119644650 | 119644750 | 1100-Lng-A-T | 114  | chr10:119644650-119644750 |
| chr10 | 119646950 | 119647050 | 1090-Lng-A-T | 80   | chr10:119646950-119647050 |
| chr10 | 119971250 | 119971350 | 1072-Lng-A-T | 104  | chr10:119971250-119971350 |
| chr10 | 120059650 | 120059750 | 1152-Lng-A-T | 172  | chr10:120059650-120059750 |
| chr10 | 120298750 | 120298850 | 1152-Lng-A-T | 41   | chr10:120298750-120298850 |
| chr10 | 120408350 | 120408450 | 1100-Lng-A-T | 127  | chr10:120408350-120408450 |
| chr10 | 120456950 | 120457050 | 901-Lng-B-T  | 74   | chr10:120456950-120457050 |
| chr10 | 120669150 | 120669250 | 1065-Lng-A-T | 101  | chr10:120669150-120669250 |
| chr10 | 120803950 | 120804050 | 1004-Lng-A-T | 117  | chr10:120803950-120804050 |
| chr10 | 120920950 | 120921050 | 1065-Lng-C-T | 93   | chr10:120920950-120921050 |
| chr10 | 121022750 | 121022850 | 1223-Lng-D-T | 107  | chr10:121022750-121022850 |

**Table S2: SB Insertion regions**

|       |           |           |              |     |                           |
|-------|-----------|-----------|--------------|-----|---------------------------|
| chr10 | 121095450 | 121095550 | 901-Lng-C-T  | 44  | chr10:121095450-121095550 |
| chr10 | 121687850 | 121687950 | 1223-Lng-D-T | 45  | chr10:121687850-121687950 |
| chr10 | 121823750 | 121823850 | 1188-Lng-A-T | 36  | chr10:121823750-121823850 |
| chr10 | 121879550 | 121879650 | 1223-Lng-C-T | 51  | chr10:121879550-121879650 |
| chr10 | 122134950 | 122135050 | 1100-Lng-A-T | 69  | chr10:122134950-122135050 |
| chr10 | 122150950 | 122151050 | 1004-Lng-A-T | 76  | chr10:122150950-122151050 |
| chr10 | 122162750 | 122162850 | 1065-Lng-A-T | 37  | chr10:122162750-122162850 |
| chr10 | 122249250 | 122249350 | 1072-Lng-A-T | 63  | chr10:122249250-122249350 |
| chr10 | 122427250 | 122427350 | 901-Lng-A-T  | 102 | chr10:122427250-122427350 |
| chr10 | 122529050 | 122529150 | 1167-Lng-A-T | 232 | chr10:122529050-122529150 |
| chr10 | 122549850 | 122549950 | 1167-Lng-A-T | 114 | chr10:122549850-122549950 |
| chr10 | 122552850 | 122552950 | 1065-Lng-C-T | 93  | chr10:122552850-122552950 |
| chr10 | 122584950 | 122585050 | 1072-Lng-A-T | 146 | chr10:122584950-122585050 |
| chr10 | 122591250 | 122591350 | 1100-Lng-A-T | 204 | chr10:122591250-122591350 |
| chr10 | 122593350 | 122593450 | 1065-Lng-B-T | 49  | chr10:122593350-122593450 |
| chr10 | 122680650 | 122680750 | 1065-Lng-B-T | 59  | chr10:122680650-122680750 |
| chr10 | 122902850 | 122902950 | 901-Lng-C-T  | 85  | chr10:122902850-122902950 |
| chr10 | 122956750 | 122956850 | 1065-Lng-B-T | 75  | chr10:122956750-122956850 |
| chr10 | 123083750 | 123083850 | 1065-Lng-B-T | 68  | chr10:123083750-123083850 |
| chr10 | 123159750 | 123159850 | 901-Lng-B-T  | 188 | chr10:123159750-123159850 |
| chr10 | 123624650 | 123624750 | 1167-Lng-A-T | 921 | chr10:123624650-123624750 |
| chr10 | 123652750 | 123652850 | 846-Lng-A-T  | 115 | chr10:123652750-123652850 |
| chr10 | 124151950 | 124152050 | 846-Lng-A-T  | 112 | chr10:124151950-124152050 |
| chr10 | 124271450 | 124271550 | 1152-Lng-A-T | 39  | chr10:124271450-124271550 |
| chr10 | 124273950 | 124274050 | 846-Lng-A-T  | 113 | chr10:124273950-124274050 |
| chr10 | 124385650 | 124385750 | 1090-Lng-A-T | 64  | chr10:124385650-124385750 |
| chr10 | 124395550 | 124395650 | 1090-Lng-A-T | 46  | chr10:124395550-124395650 |
| chr10 | 124435850 | 124435950 | 1152-Lng-A-T | 62  | chr10:124435850-124435950 |
| chr10 | 124453450 | 124453550 | 901-Lng-C-T  | 51  | chr10:124453450-124453550 |
| chr10 | 124497350 | 124497450 | 1004-Lng-A-T | 67  | chr10:124497350-124497450 |
| chr10 | 124578950 | 124579050 | 1223-Lng-C-T | 43  | chr10:124578950-124579050 |
| chr10 | 124664150 | 124664250 | 1065-Lng-A-T | 86  | chr10:124664150-124664250 |
| chr10 | 124695550 | 124695650 | 1072-Lng-A-T | 49  | chr10:124695550-124695650 |
| chr10 | 124737350 | 124737450 | 1065-Lng-A-T | 52  | chr10:124737350-124737450 |
| chr10 | 125133150 | 125133250 | 901-Lng-A-T  | 212 | chr10:125133150-125133250 |
| chr10 | 125473850 | 125473950 | 1065-Lng-A-T | 50  | chr10:125473850-125473950 |
| chr10 | 125887150 | 125887250 | 1065-Lng-B-T | 75  | chr10:125887150-125887250 |
| chr10 | 126003750 | 126003850 | 901-Lng-A-T  | 93  | chr10:126003750-126003850 |
| chr10 | 126337550 | 126337650 | 1100-Lng-A-T | 229 | chr10:126337550-126337650 |
| chr10 | 126560550 | 126560650 | 1065-Lng-A-T | 58  | chr10:126560550-126560650 |
| chr10 | 126592950 | 126593050 | 901-Lng-C-T  | 34  | chr10:126592950-126593050 |
| chr10 | 126708350 | 126708450 | 1274-Lng-A-T | 59  | chr10:126708350-126708450 |
| chr10 | 126766950 | 126767050 | 1274-Lng-A-T | 52  | chr10:126766950-126767050 |
| chr10 | 126864150 | 126864250 | 1188-Lng-A-T | 213 | chr10:126864150-126864250 |
| chr10 | 126929150 | 126929250 | 1152-Lng-A-T | 314 | chr10:126929150-126929250 |
| chr10 | 127126350 | 127126450 | 901-Lng-C-T  | 228 | chr10:127126350-127126450 |

**Table S2: SB Insertion regions**

|       |           |           |              |     |                           |
|-------|-----------|-----------|--------------|-----|---------------------------|
| chr10 | 127424550 | 127424650 | 1065-Lng-A-T | 34  | chr10:127424550-127424650 |
| chr10 | 127457750 | 127457850 | 1151-Lng-A-T | 64  | chr10:127457750-127457850 |
| chr10 | 127474850 | 127474950 | 1223-Lng-D-T | 68  | chr10:127474850-127474950 |
| chr10 | 127542250 | 127542350 | 1223-Lng-A-T | 290 | chr10:127542250-127542350 |
| chr10 | 127621150 | 127621250 | 1223-Lng-B-T | 35  | chr10:127621150-127621250 |
| chr10 | 127630150 | 127630250 | 1065-Lng-B-T | 48  | chr10:127630150-127630250 |
| chr10 | 127719350 | 127719450 | 1151-Lng-A-T | 72  | chr10:127719350-127719450 |
| chr10 | 127784850 | 127784950 | 1152-Lng-A-T | 45  | chr10:127784850-127784950 |
| chr10 | 127804650 | 127804750 | 901-Lng-C-T  | 143 | chr10:127804650-127804750 |
| chr10 | 127852850 | 127852950 | 1090-Lng-B-T | 83  | chr10:127852850-127852950 |
| chr10 | 127880450 | 127880550 | 901-Lng-A-T  | 106 | chr10:127880450-127880550 |
| chr10 | 127971550 | 127971650 | 901-Lng-C-T  | 75  | chr10:127971550-127971650 |
| chr10 | 128047850 | 128047950 | 1100-Lng-A-T | 91  | chr10:128047850-128047950 |
| chr10 | 128060850 | 128060950 | 901-Lng-D-T  | 125 | chr10:128060850-128060950 |
| chr10 | 128128850 | 128128950 | 1188-Lng-A-T | 74  | chr10:128128850-128128950 |
| chr10 | 128189950 | 128190050 | 1274-Lng-A-T | 135 | chr10:128189950-128190050 |
| chr10 | 128264150 | 128264250 | 1100-Lng-A-T | 77  | chr10:128264150-128264250 |
| chr10 | 128269550 | 128269650 | 1065-Lng-B-T | 70  | chr10:128269550-128269650 |
| chr10 | 128303250 | 128303350 | 1065-Lng-B-T | 55  | chr10:128303250-128303350 |
| chr10 | 128322850 | 128322950 | 1274-Lng-A-T | 60  | chr10:128322850-128322950 |
| chr10 | 128537950 | 128538050 | 1223-Lng-B-T | 188 | chr10:128537950-128538050 |
| chr10 | 128618650 | 128618750 | 901-Lng-D-T  | 81  | chr10:128618650-128618750 |
| chr10 | 128708850 | 128708950 | 1223-Lng-A-T | 170 | chr10:128708850-128708950 |
| chr10 | 128795650 | 128795750 | 1223-Lng-C-T | 43  | chr10:128795650-128795750 |
| chr10 | 128834950 | 128835050 | 1152-Lng-A-T | 254 | chr10:128834950-128835050 |
| chr10 | 129068850 | 129068950 | 1223-Lng-D-T | 48  | chr10:129068850-129068950 |
| chr10 | 129094950 | 129095050 | 1152-Lng-A-T | 36  | chr10:129094950-129095050 |
| chr10 | 129343750 | 129343850 | 1065-Lng-A-T | 60  | chr10:129343750-129343850 |
| chr10 | 129347750 | 129347850 | 901-Lng-C-T  | 61  | chr10:129347750-129347850 |
| chr10 | 129351050 | 129351150 | 1152-Lng-A-T | 34  | chr10:129351050-129351150 |
| chr10 | 129517550 | 129517650 | 846-Lng-A-T  | 189 | chr10:129517550-129517650 |
| chr10 | 129552450 | 129552550 | 1188-Lng-A-T | 140 | chr10:129552450-129552550 |
| chr10 | 129662850 | 129662950 | 1065-Lng-C-T | 86  | chr10:129662850-129662950 |
| chr10 | 129888850 | 129888950 | 901-Lng-A-T  | 176 | chr10:129888850-129888950 |
| chr10 | 129983450 | 129983550 | 901-Lng-C-T  | 33  | chr10:129983450-129983550 |
| chr11 | 3001850   | 3001950   | 1065-Lng-B-T | 58  | chr11:3001850-3001950     |
| chr11 | 3030350   | 3030450   | 901-Lng-B-T  | 130 | chr11:3030350-3030450     |
| chr11 | 3031450   | 3031550   | 1090-Lng-A-T | 68  | chr11:3031450-3031550     |
| chr11 | 3042150   | 3042250   | 1090-Lng-A-T | 82  | chr11:3042150-3042250     |
| chr11 | 3046450   | 3046550   | 1223-Lng-D-T | 78  | chr11:3046450-3046550     |
| chr11 | 3046550   | 3046650   | 1065-Lng-B-T | 75  | chr11:3046550-3046650     |
| chr11 | 3048550   | 3048650   | 1100-Lng-B-T | 78  | chr11:3048550-3048650     |
| chr11 | 3049650   | 3049750   | 1065-Lng-B-T | 45  | chr11:3049650-3049750     |
| chr11 | 3052450   | 3052550   | 901-Lng-B-T  | 184 | chr11:3052450-3052550     |
| chr11 | 3061250   | 3061350   | 1090-Lng-A-T | 309 | chr11:3061250-3061350     |
| chr11 | 3065150   | 3065250   | 1167-Lng-A-T | 67  | chr11:3065150-3065250     |

**Table S2: SB Insertion regions**

|       |         |         |              |      |                       |
|-------|---------|---------|--------------|------|-----------------------|
| chr11 | 3072550 | 3072650 | 1090-Lng-A-T | 61   | chr11:3072550-3072650 |
| chr11 | 3072850 | 3072950 | 1065-Lng-B-T | 63   | chr11:3072850-3072950 |
| chr11 | 3076150 | 3076250 | 1065-Lng-B-T | 41   | chr11:3076150-3076250 |
| chr11 | 3099750 | 3099850 | 1065-Lng-B-T | 251  | chr11:3099750-3099850 |
| chr11 | 3112250 | 3112350 | 1151-Lng-A-T | 66   | chr11:3112250-3112350 |
| chr11 | 3118550 | 3118650 | 1223-Lng-A-T | 72   | chr11:3118550-3118650 |
| chr11 | 3171550 | 3171650 | 901-Lng-C-T  | 192  | chr11:3171550-3171650 |
| chr11 | 3247150 | 3247250 | 1004-Lng-A-T | 65   | chr11:3247150-3247250 |
| chr11 | 3262250 | 3262350 | 1100-Lng-A-T | 53   | chr11:3262250-3262350 |
| chr11 | 3322550 | 3322650 | 1065-Lng-A-T | 58   | chr11:3322550-3322650 |
| chr11 | 3348650 | 3348750 | 1223-Lng-A-T | 1087 | chr11:3348650-3348750 |
| chr11 | 3536850 | 3536950 | 1065-Lng-C-T | 121  | chr11:3536850-3536950 |
| chr11 | 3586650 | 3586750 | 901-Lng-D-T  | 296  | chr11:3586650-3586750 |
| chr11 | 3799150 | 3799250 | 901-Lng-D-T  | 330  | chr11:3799150-3799250 |
| chr11 | 3846050 | 3846150 | 1167-Lng-A-T | 146  | chr11:3846050-3846150 |
| chr11 | 3894250 | 3894350 | 1065-Lng-C-T | 3659 | chr11:3894250-3894350 |
| chr11 | 3967850 | 3967950 | 1100-Lng-A-T | 52   | chr11:3967850-3967950 |
| chr11 | 4102950 | 4103050 | 1065-Lng-C-T | 103  | chr11:4102950-4103050 |
| chr11 | 4436650 | 4436750 | 1100-Lng-A-T | 133  | chr11:4436650-4436750 |
| chr11 | 4445750 | 4445850 | 1152-Lng-A-T | 51   | chr11:4445750-4445850 |
| chr11 | 4468650 | 4468750 | 1151-Lng-A-T | 56   | chr11:4468650-4468750 |
| chr11 | 4479050 | 4479150 | 1100-Lng-A-T | 83   | chr11:4479050-4479150 |
| chr11 | 4487750 | 4487850 | 901-Lng-B-T  | 128  | chr11:4487750-4487850 |
| chr11 | 4490850 | 4490950 | 1188-Lng-A-T | 271  | chr11:4490850-4490950 |
| chr11 | 4498950 | 4499050 | 1223-Lng-C-T | 98   | chr11:4498950-4499050 |
| chr11 | 4538850 | 4538950 | 846-Lng-A-T  | 80   | chr11:4538850-4538950 |
| chr11 | 4596850 | 4596950 | 1188-Lng-A-T | 255  | chr11:4596850-4596950 |
| chr11 | 4643050 | 4643150 | 901-Lng-A-T  | 57   | chr11:4643050-4643150 |
| chr11 | 4719350 | 4719450 | 1100-Lng-A-T | 117  | chr11:4719350-4719450 |
| chr11 | 4967950 | 4968050 | 1167-Lng-A-T | 60   | chr11:4967950-4968050 |
| chr11 | 4997150 | 4997250 | 1223-Lng-D-T | 47   | chr11:4997150-4997250 |
| chr11 | 5135850 | 5135950 | 1151-Lng-A-T | 150  | chr11:5135850-5135950 |
| chr11 | 5151650 | 5151750 | 901-Lng-A-T  | 58   | chr11:5151650-5151750 |
| chr11 | 5223150 | 5223250 | 1274-Lng-A-T | 69   | chr11:5223150-5223250 |
| chr11 | 5253850 | 5253950 | 1072-Lng-A-T | 143  | chr11:5253850-5253950 |
| chr11 | 5319750 | 5319850 | 1151-Lng-A-T | 68   | chr11:5319750-5319850 |
| chr11 | 5417850 | 5417950 | 1188-Lng-A-T | 43   | chr11:5417850-5417950 |
| chr11 | 5577450 | 5577550 | 1223-Lng-A-T | 118  | chr11:5577450-5577550 |
| chr11 | 5734150 | 5734250 | 1188-Lng-A-T | 267  | chr11:5734150-5734250 |
| chr11 | 5781250 | 5781350 | 846-Lng-A-T  | 201  | chr11:5781250-5781350 |
| chr11 | 5831450 | 5831550 | 1004-Lng-A-T | 52   | chr11:5831450-5831550 |
| chr11 | 5903750 | 5903850 | 1065-Lng-C-T | 160  | chr11:5903750-5903850 |
| chr11 | 6092150 | 6092250 | 1152-Lng-A-T | 50   | chr11:6092150-6092250 |
| chr11 | 6199450 | 6199550 | 1223-Lng-C-T | 4018 | chr11:6199450-6199550 |
| chr11 | 6207950 | 6208050 | 1100-Lng-A-T | 67   | chr11:6207950-6208050 |
| chr11 | 6237850 | 6237950 | 1065-Lng-C-T | 89   | chr11:6237850-6237950 |

**Table S2: SB Insertion regions**

|       |          |          |              |     |                         |
|-------|----------|----------|--------------|-----|-------------------------|
| chr11 | 6290450  | 6290550  | 1274-Lng-A-T | 86  | chr11:6290450-6290550   |
| chr11 | 6314650  | 6314750  | 1065-Lng-C-T | 86  | chr11:6314650-6314750   |
| chr11 | 6332150  | 6332250  | 846-Lng-A-T  | 112 | chr11:6332150-6332250   |
| chr11 | 6415250  | 6415350  | 1100-Lng-B-T | 142 | chr11:6415250-6415350   |
| chr11 | 6472350  | 6472450  | 1090-Lng-A-T | 66  | chr11:6472350-6472450   |
| chr11 | 6472450  | 6472550  | 1100-Lng-A-T | 72  | chr11:6472450-6472550   |
| chr11 | 6473750  | 6473850  | 1004-Lng-A-T | 49  | chr11:6473750-6473850   |
| chr11 | 6770350  | 6770450  | 901-Lng-C-T  | 33  | chr11:6770350-6770450   |
| chr11 | 6772250  | 6772350  | 1223-Lng-A-T | 725 | chr11:6772250-6772350   |
| chr11 | 6807050  | 6807150  | 901-Lng-D-T  | 124 | chr11:6807050-6807150   |
| chr11 | 7074050  | 7074150  | 1072-Lng-A-T | 75  | chr11:7074050-7074150   |
| chr11 | 7186550  | 7186650  | 846-Lng-A-T  | 125 | chr11:7186550-7186650   |
| chr11 | 7202850  | 7202950  | 901-Lng-A-T  | 91  | chr11:7202850-7202950   |
| chr11 | 7394350  | 7394450  | 846-Lng-A-T  | 478 | chr11:7394350-7394450   |
| chr11 | 7568450  | 7568550  | 1065-Lng-A-T | 151 | chr11:7568450-7568550   |
| chr11 | 7605150  | 7605250  | 1274-Lng-A-T | 64  | chr11:7605150-7605250   |
| chr11 | 7765950  | 7766050  | 901-Lng-A-T  | 93  | chr11:7765950-7766050   |
| chr11 | 8024450  | 8024550  | 901-Lng-A-T  | 144 | chr11:8024450-8024550   |
| chr11 | 8040150  | 8040250  | 1065-Lng-C-T | 114 | chr11:8040150-8040250   |
| chr11 | 8401850  | 8401950  | 1151-Lng-A-T | 200 | chr11:8401850-8401950   |
| chr11 | 8418550  | 8418650  | 1065-Lng-B-T | 62  | chr11:8418550-8418650   |
| chr11 | 8457050  | 8457150  | 901-Lng-D-T  | 168 | chr11:8457050-8457150   |
| chr11 | 8535550  | 8535650  | 1274-Lng-A-T | 51  | chr11:8535550-8535650   |
| chr11 | 8845950  | 8846050  | 1152-Lng-A-T | 109 | chr11:8845950-8846050   |
| chr11 | 9099350  | 9099450  | 1223-Lng-D-T | 44  | chr11:9099350-9099450   |
| chr11 | 9192450  | 9192550  | 1065-Lng-C-T | 101 | chr11:9192450-9192550   |
| chr11 | 9225850  | 9225950  | 1065-Lng-A-T | 96  | chr11:9225850-9225950   |
| chr11 | 9241650  | 9241750  | 1152-Lng-A-T | 60  | chr11:9241650-9241750   |
| chr11 | 9495750  | 9495850  | 901-Lng-D-T  | 203 | chr11:9495750-9495850   |
| chr11 | 9498550  | 9498650  | 1223-Lng-B-T | 38  | chr11:9498550-9498650   |
| chr11 | 9563150  | 9563250  | 901-Lng-C-T  | 39  | chr11:9563150-9563250   |
| chr11 | 9619550  | 9619650  | 901-Lng-A-T  | 60  | chr11:9619550-9619650   |
| chr11 | 9674650  | 9674750  | 1072-Lng-A-T | 53  | chr11:9674650-9674750   |
| chr11 | 9675650  | 9675750  | 1065-Lng-C-T | 61  | chr11:9675650-9675750   |
| chr11 | 9692350  | 9692450  | 1065-Lng-C-T | 86  | chr11:9692350-9692450   |
| chr11 | 9699250  | 9699350  | 1072-Lng-A-T | 190 | chr11:9699250-9699350   |
| chr11 | 9740050  | 9740150  | 901-Lng-A-T  | 86  | chr11:9740050-9740150   |
| chr11 | 9864650  | 9864750  | 1065-Lng-C-T | 62  | chr11:9864650-9864750   |
| chr11 | 9951050  | 9951150  | 1065-Lng-A-T | 46  | chr11:9951050-9951150   |
| chr11 | 9973950  | 9974050  | 1072-Lng-A-T | 69  | chr11:9973950-9974050   |
| chr11 | 9974350  | 9974450  | 1072-Lng-A-T | 107 | chr11:9974350-9974450   |
| chr11 | 10093350 | 10093450 | 1223-Lng-C-T | 50  | chr11:10093350-10093450 |
| chr11 | 10143550 | 10143650 | 901-Lng-B-T  | 291 | chr11:10143550-10143650 |
| chr11 | 10426950 | 10427050 | 1065-Lng-C-T | 63  | chr11:10426950-10427050 |
| chr11 | 10440550 | 10440650 | 1004-Lng-A-T | 72  | chr11:10440550-10440650 |
| chr11 | 10498450 | 10498550 | 901-Lng-B-T  | 137 | chr11:10498450-10498550 |

**Table S2: SB Insertion regions**

|       |          |          |              |      |                         |
|-------|----------|----------|--------------|------|-------------------------|
| chr11 | 10551250 | 10551350 | 1188-Lng-A-T | 44   | chr11:10551250-10551350 |
| chr11 | 10551550 | 10551650 | 1090-Lng-A-T | 95   | chr11:10551550-10551650 |
| chr11 | 10634150 | 10634250 | 901-Lng-B-T  | 76   | chr11:10634150-10634250 |
| chr11 | 10702850 | 10702950 | 1223-Lng-D-T | 57   | chr11:10702850-10702950 |
| chr11 | 10800650 | 10800750 | 1100-Lng-A-T | 92   | chr11:10800650-10800750 |
| chr11 | 10805650 | 10805750 | 1065-Lng-C-T | 89   | chr11:10805650-10805750 |
| chr11 | 10821950 | 10822050 | 1065-Lng-C-T | 65   | chr11:10821950-10822050 |
| chr11 | 11078550 | 11078650 | 1100-Lng-B-T | 54   | chr11:11078550-11078650 |
| chr11 | 11083050 | 11083150 | 901-Lng-D-T  | 70   | chr11:11083050-11083150 |
| chr11 | 11285150 | 11285250 | 1065-Lng-C-T | 70   | chr11:11285150-11285250 |
| chr11 | 11328950 | 11329050 | 1223-Lng-D-T | 52   | chr11:11328950-11329050 |
| chr11 | 11609150 | 11609250 | 1167-Lng-A-T | 69   | chr11:11609150-11609250 |
| chr11 | 11895250 | 11895350 | 1274-Lng-A-T | 173  | chr11:11895250-11895350 |
| chr11 | 11899250 | 11899350 | 1065-Lng-B-T | 51   | chr11:11899250-11899350 |
| chr11 | 12006950 | 12007050 | 1065-Lng-C-T | 2237 | chr11:12006950-12007050 |
| chr11 | 12069650 | 12069750 | 901-Lng-D-T  | 360  | chr11:12069650-12069750 |
| chr11 | 12137050 | 12137150 | 1072-Lng-A-T | 73   | chr11:12137050-12137150 |
| chr11 | 12137550 | 12137650 | 901-Lng-B-T  | 169  | chr11:12137550-12137650 |
| chr11 | 12151850 | 12151950 | 1004-Lng-A-T | 173  | chr11:12151850-12151950 |
| chr11 | 12164850 | 12164950 | 1100-Lng-A-T | 104  | chr11:12164850-12164950 |
| chr11 | 12187550 | 12187650 | 1090-Lng-A-T | 88   | chr11:12187550-12187650 |
| chr11 | 12203750 | 12203850 | 1004-Lng-A-T | 55   | chr11:12203750-12203850 |
| chr11 | 12265750 | 12265850 | 901-Lng-A-T  | 67   | chr11:12265750-12265850 |
| chr11 | 12287150 | 12287250 | 1188-Lng-A-T | 39   | chr11:12287150-12287250 |
| chr11 | 12297850 | 12297950 | 1223-Lng-A-T | 73   | chr11:12297850-12297950 |
| chr11 | 12319750 | 12319850 | 901-Lng-C-T  | 53   | chr11:12319750-12319850 |
| chr11 | 12429250 | 12429350 | 1065-Lng-C-T | 73   | chr11:12429250-12429350 |
| chr11 | 12507650 | 12507750 | 1065-Lng-A-T | 46   | chr11:12507650-12507750 |
| chr11 | 12507650 | 12507750 | 1065-Lng-C-T | 906  | chr11:12507650-12507750 |
| chr11 | 12591650 | 12591750 | 846-Lng-A-T  | 61   | chr11:12591650-12591750 |
| chr11 | 12603750 | 12603850 | 1152-Lng-A-T | 189  | chr11:12603750-12603850 |
| chr11 | 12998150 | 12998250 | 1223-Lng-B-T | 307  | chr11:12998150-12998250 |
| chr11 | 12998950 | 12999050 | 1223-Lng-D-T | 88   | chr11:12998950-12999050 |
| chr11 | 13116450 | 13116550 | 1090-Lng-A-T | 68   | chr11:13116450-13116550 |
| chr11 | 13142350 | 13142450 | 1072-Lng-A-T | 88   | chr11:13142350-13142450 |
| chr11 | 13383350 | 13383450 | 1065-Lng-C-T | 99   | chr11:13383350-13383450 |
| chr11 | 13398050 | 13398150 | 1065-Lng-C-T | 138  | chr11:13398050-13398150 |
| chr11 | 13400250 | 13400350 | 1065-Lng-C-T | 73   | chr11:13400250-13400350 |
| chr11 | 13561950 | 13562050 | 1223-Lng-D-T | 41   | chr11:13561950-13562050 |
| chr11 | 13854550 | 13854650 | 901-Lng-C-T  | 47   | chr11:13854550-13854650 |
| chr11 | 14039050 | 14039150 | 1065-Lng-A-T | 58   | chr11:14039050-14039150 |
| chr11 | 14311050 | 14311150 | 1072-Lng-A-T | 125  | chr11:14311050-14311150 |
| chr11 | 14393150 | 14393250 | 1090-Lng-A-T | 46   | chr11:14393150-14393250 |
| chr11 | 14790050 | 14790150 | 1090-Lng-A-T | 44   | chr11:14790050-14790150 |
| chr11 | 15002750 | 15002850 | 901-Lng-A-T  | 172  | chr11:15002750-15002850 |
| chr11 | 15146550 | 15146650 | 1065-Lng-C-T | 64   | chr11:15146550-15146650 |



**Table S2: SB Insertion regions**

|       |          |          |              |      |                         |
|-------|----------|----------|--------------|------|-------------------------|
| chr11 | 15264750 | 15264850 | 1152-Lng-A-T | 54   | chr11:15264750-15264850 |
| chr11 | 15356450 | 15356550 | 1065-Lng-B-T | 51   | chr11:15356450-15356550 |
| chr11 | 15711650 | 15711750 | 1065-Lng-A-T | 72   | chr11:15711650-15711750 |
| chr11 | 15800850 | 15800950 | 901-Lng-B-T  | 130  | chr11:15800850-15800950 |
| chr11 | 16092350 | 16092450 | 1223-Lng-A-T | 51   | chr11:16092350-16092450 |
| chr11 | 16323550 | 16323650 | 1100-Lng-A-T | 103  | chr11:16323550-16323650 |
| chr11 | 16433150 | 16433250 | 1100-Lng-A-T | 78   | chr11:16433150-16433250 |
| chr11 | 16437550 | 16437650 | 1004-Lng-A-T | 54   | chr11:16437550-16437650 |
| chr11 | 16538250 | 16538350 | 1072-Lng-A-T | 145  | chr11:16538250-16538350 |
| chr11 | 16583150 | 16583250 | 1223-Lng-B-T | 36   | chr11:16583150-16583250 |
| chr11 | 16604850 | 16604950 | 1223-Lng-B-T | 58   | chr11:16604850-16604950 |
| chr11 | 16668450 | 16668550 | 1274-Lng-A-T | 50   | chr11:16668450-16668550 |
| chr11 | 16792350 | 16792450 | 1223-Lng-B-T | 37   | chr11:16792350-16792450 |
| chr11 | 17045450 | 17045550 | 901-Lng-B-T  | 117  | chr11:17045450-17045550 |
| chr11 | 17060550 | 17060650 | 901-Lng-C-T  | 30   | chr11:17060550-17060650 |
| chr11 | 17070650 | 17070750 | 1223-Lng-C-T | 43   | chr11:17070650-17070750 |
| chr11 | 17070750 | 17070850 | 1223-Lng-C-T | 116  | chr11:17070750-17070850 |
| chr11 | 17079750 | 17079850 | 1223-Lng-A-T | 131  | chr11:17079750-17079850 |
| chr11 | 17091350 | 17091450 | 846-Lng-A-T  | 277  | chr11:17091350-17091450 |
| chr11 | 17644150 | 17644250 | 901-Lng-C-T  | 139  | chr11:17644150-17644250 |
| chr11 | 17822750 | 17822850 | 901-Lng-A-T  | 773  | chr11:17822750-17822850 |
| chr11 | 18184150 | 18184250 | 846-Lng-A-T  | 67   | chr11:18184150-18184250 |
| chr11 | 18330750 | 18330850 | 1065-Lng-B-T | 49   | chr11:18330750-18330850 |
| chr11 | 18337350 | 18337450 | 1065-Lng-C-T | 99   | chr11:18337350-18337450 |
| chr11 | 18407650 | 18407750 | 1188-Lng-A-T | 36   | chr11:18407650-18407750 |
| chr11 | 18440250 | 18440350 | 1274-Lng-A-T | 79   | chr11:18440250-18440350 |
| chr11 | 18727850 | 18727950 | 1100-Lng-A-T | 61   | chr11:18727850-18727950 |
| chr11 | 18796250 | 18796350 | 1188-Lng-A-T | 51   | chr11:18796250-18796350 |
| chr11 | 18828850 | 18828950 | 1152-Lng-A-T | 55   | chr11:18828850-18828950 |
| chr11 | 19012150 | 19012250 | 1223-Lng-A-T | 109  | chr11:19012150-19012250 |
| chr11 | 19572150 | 19572250 | 1223-Lng-A-T | 81   | chr11:19572150-19572250 |
| chr11 | 19616350 | 19616450 | 1072-Lng-A-T | 154  | chr11:19616350-19616450 |
| chr11 | 19799550 | 19799650 | 1223-Lng-B-T | 281  | chr11:19799550-19799650 |
| chr11 | 19828950 | 19829050 | 1223-Lng-B-T | 36   | chr11:19828950-19829050 |
| chr11 | 19893750 | 19893850 | 1151-Lng-A-T | 59   | chr11:19893750-19893850 |
| chr11 | 19937050 | 19937150 | 1188-Lng-A-T | 50   | chr11:19937050-19937150 |
| chr11 | 19972450 | 19972550 | 1274-Lng-A-T | 81   | chr11:19972450-19972550 |
| chr11 | 19985750 | 19985850 | 1274-Lng-A-T | 52   | chr11:19985750-19985850 |
| chr11 | 19987950 | 19988050 | 901-Lng-C-T  | 170  | chr11:19987950-19988050 |
| chr11 | 19990350 | 19990450 | 1072-Lng-A-T | 48   | chr11:19990350-19990450 |
| chr11 | 19994850 | 19994950 | 1223-Lng-C-T | 47   | chr11:19994850-19994950 |
| chr11 | 19998250 | 19998350 | 1152-Lng-A-T | 137  | chr11:19998250-19998350 |
| chr11 | 20007150 | 20007250 | 1090-Lng-A-T | 78   | chr11:20007150-20007250 |
| chr11 | 20008650 | 20008750 | 1223-Lng-D-T | 1265 | chr11:20008650-20008750 |
| chr11 | 20086650 | 20086750 | 901-Lng-C-T  | 179  | chr11:20086650-20086750 |
| chr11 | 20105550 | 20105650 | 1274-Lng-A-T | 120  | chr11:20105550-20105650 |

**Table S2: SB Insertion regions**

|       |          |          |              |      |                         |
|-------|----------|----------|--------------|------|-------------------------|
| chr11 | 20113050 | 20113150 | 1090-Lng-A-T | 45   | chr11:20113050-20113150 |
| chr11 | 20114750 | 20114850 | 901-Lng-C-T  | 31   | chr11:20114750-20114850 |
| chr11 | 20120350 | 20120450 | 1223-Lng-B-T | 277  | chr11:20120350-20120450 |
| chr11 | 20120350 | 20120450 | 901-Lng-B-T  | 69   | chr11:20120350-20120450 |
| chr11 | 20125350 | 20125450 | 1090-Lng-A-T | 1220 | chr11:20125350-20125450 |
| chr11 | 20133650 | 20133750 | 1100-Lng-A-T | 90   | chr11:20133650-20133750 |
| chr11 | 20458150 | 20458250 | 901-Lng-B-T  | 177  | chr11:20458150-20458250 |
| chr11 | 20461750 | 20461850 | 901-Lng-A-T  | 67   | chr11:20461750-20461850 |
| chr11 | 20588850 | 20588950 | 1274-Lng-A-T | 79   | chr11:20588850-20588950 |
| chr11 | 20599550 | 20599650 | 1274-Lng-A-T | 158  | chr11:20599550-20599650 |
| chr11 | 20618650 | 20618750 | 1065-Lng-A-T | 68   | chr11:20618650-20618750 |
| chr11 | 20730050 | 20730150 | 846-Lng-A-T  | 102  | chr11:20730050-20730150 |
| chr11 | 20917850 | 20917950 | 1223-Lng-D-T | 163  | chr11:20917850-20917950 |
| chr11 | 20963150 | 20963250 | 1072-Lng-A-T | 72   | chr11:20963150-20963250 |
| chr11 | 21010550 | 21010650 | 1100-Lng-A-T | 232  | chr11:21010550-21010650 |
| chr11 | 21011450 | 21011550 | 1065-Lng-A-T | 53   | chr11:21011450-21011550 |
| chr11 | 21014850 | 21014950 | 1100-Lng-B-T | 65   | chr11:21014850-21014950 |
| chr11 | 21035150 | 21035250 | 1223-Lng-C-T | 50   | chr11:21035150-21035250 |
| chr11 | 21039850 | 21039950 | 1188-Lng-A-T | 63   | chr11:21039850-21039950 |
| chr11 | 21164850 | 21164950 | 1065-Lng-B-T | 44   | chr11:21164850-21164950 |
| chr11 | 21170150 | 21170250 | 1004-Lng-A-T | 66   | chr11:21170150-21170250 |
| chr11 | 21175550 | 21175650 | 1100-Lng-A-T | 69   | chr11:21175550-21175650 |
| chr11 | 21182950 | 21183050 | 1274-Lng-A-T | 64   | chr11:21182950-21183050 |
| chr11 | 21187550 | 21187650 | 1223-Lng-A-T | 116  | chr11:21187550-21187650 |
| chr11 | 21188550 | 21188650 | 1274-Lng-A-T | 77   | chr11:21188550-21188650 |
| chr11 | 21199550 | 21199650 | 1072-Lng-A-T | 49   | chr11:21199550-21199650 |
| chr11 | 21199650 | 21199750 | 1188-Lng-A-T | 63   | chr11:21199650-21199750 |
| chr11 | 21206150 | 21206250 | 1065-Lng-B-T | 43   | chr11:21206150-21206250 |
| chr11 | 21233150 | 21233250 | 1090-Lng-B-T | 62   | chr11:21233150-21233250 |
| chr11 | 21340850 | 21340950 | 1090-Lng-A-T | 44   | chr11:21340850-21340950 |
| chr11 | 21466350 | 21466450 | 1090-Lng-B-T | 374  | chr11:21466350-21466450 |
| chr11 | 21518850 | 21518950 | 1274-Lng-A-T | 50   | chr11:21518850-21518950 |
| chr11 | 21591650 | 21591750 | 1090-Lng-B-T | 67   | chr11:21591650-21591750 |
| chr11 | 21940650 | 21940750 | 1188-Lng-A-T | 90   | chr11:21940650-21940750 |
| chr11 | 21940750 | 21940850 | 1065-Lng-A-T | 64   | chr11:21940750-21940850 |
| chr11 | 21968050 | 21968150 | 901-Lng-B-T  | 54   | chr11:21968050-21968150 |
| chr11 | 22055750 | 22055850 | 1223-Lng-D-T | 53   | chr11:22055750-22055850 |
| chr11 | 22146450 | 22146550 | 1065-Lng-C-T | 70   | chr11:22146450-22146550 |
| chr11 | 22543950 | 22544050 | 901-Lng-C-T  | 74   | chr11:22543950-22544050 |
| chr11 | 22547750 | 22547850 | 846-Lng-A-T  | 53   | chr11:22547750-22547850 |
| chr11 | 22595350 | 22595450 | 1065-Lng-C-T | 64   | chr11:22595350-22595450 |
| chr11 | 22754950 | 22755050 | 1100-Lng-A-T | 80   | chr11:22754950-22755050 |
| chr11 | 22780850 | 22780950 | 901-Lng-D-T  | 69   | chr11:22780850-22780950 |
| chr11 | 22835750 | 22835850 | 1090-Lng-A-T | 71   | chr11:22835750-22835850 |
| chr11 | 22894150 | 22894250 | 1152-Lng-A-T | 40   | chr11:22894150-22894250 |
| chr11 | 23081750 | 23081850 | 1100-Lng-A-T | 87   | chr11:23081750-23081850 |

**Table S2: SB Insertion regions**

|       |          |          |              |      |                         |
|-------|----------|----------|--------------|------|-------------------------|
| chr11 | 23242650 | 23242750 | 1072-Lng-A-T | 194  | chr11:23242650-23242750 |
| chr11 | 23262350 | 23262450 | 1152-Lng-A-T | 104  | chr11:23262350-23262450 |
| chr11 | 23281350 | 23281450 | 1090-Lng-B-T | 495  | chr11:23281350-23281450 |
| chr11 | 23281350 | 23281450 | 901-Lng-B-T  | 242  | chr11:23281350-23281450 |
| chr11 | 23296150 | 23296250 | 901-Lng-A-T  | 403  | chr11:23296150-23296250 |
| chr11 | 23336150 | 23336250 | 1004-Lng-A-T | 61   | chr11:23336150-23336250 |
| chr11 | 23343850 | 23343950 | 1065-Lng-C-T | 498  | chr11:23343850-23343950 |
| chr11 | 23344650 | 23344750 | 901-Lng-C-T  | 179  | chr11:23344650-23344750 |
| chr11 | 23364650 | 23364750 | 1004-Lng-A-T | 88   | chr11:23364650-23364750 |
| chr11 | 23510150 | 23510250 | 1167-Lng-A-T | 141  | chr11:23510150-23510250 |
| chr11 | 23561750 | 23561850 | 901-Lng-B-T  | 209  | chr11:23561750-23561850 |
| chr11 | 23784850 | 23784950 | 1188-Lng-A-T | 43   | chr11:23784850-23784950 |
| chr11 | 23846050 | 23846150 | 901-Lng-A-T  | 61   | chr11:23846050-23846150 |
| chr11 | 23850350 | 23850450 | 846-Lng-A-T  | 42   | chr11:23850350-23850450 |
| chr11 | 24055550 | 24055650 | 1223-Lng-A-T | 55   | chr11:24055550-24055650 |
| chr11 | 24407250 | 24407350 | 1065-Lng-A-T | 117  | chr11:24407250-24407350 |
| chr11 | 24431350 | 24431450 | 1223-Lng-C-T | 44   | chr11:24431350-24431450 |
| chr11 | 24765950 | 24766050 | 1065-Lng-B-T | 40   | chr11:24765950-24766050 |
| chr11 | 25157850 | 25157950 | 901-Lng-A-T  | 78   | chr11:25157850-25157950 |
| chr11 | 25277450 | 25277550 | 1065-Lng-A-T | 82   | chr11:25277450-25277550 |
| chr11 | 25306650 | 25306750 | 846-Lng-A-T  | 3313 | chr11:25306650-25306750 |
| chr11 | 25345850 | 25345950 | 901-Lng-B-T  | 185  | chr11:25345850-25345950 |
| chr11 | 25499550 | 25499650 | 1152-Lng-A-T | 114  | chr11:25499550-25499650 |
| chr11 | 25514450 | 25514550 | 1065-Lng-C-T | 67   | chr11:25514450-25514550 |
| chr11 | 25841250 | 25841350 | 1152-Lng-A-T | 103  | chr11:25841250-25841350 |
| chr11 | 25844450 | 25844550 | 846-Lng-A-T  | 127  | chr11:25844450-25844550 |
| chr11 | 25892350 | 25892450 | 1152-Lng-A-T | 79   | chr11:25892350-25892450 |
| chr11 | 25959350 | 25959450 | 1004-Lng-A-T | 62   | chr11:25959350-25959450 |
| chr11 | 26238850 | 26238950 | 1223-Lng-A-T | 108  | chr11:26238850-26238950 |
| chr11 | 26248950 | 26249050 | 1065-Lng-B-T | 54   | chr11:26248950-26249050 |
| chr11 | 26373850 | 26373950 | 1152-Lng-A-T | 67   | chr11:26373850-26373950 |
| chr11 | 26692750 | 26692850 | 1065-Lng-B-T | 58   | chr11:26692750-26692850 |
| chr11 | 26774450 | 26774550 | 1072-Lng-A-T | 132  | chr11:26774450-26774550 |
| chr11 | 26789350 | 26789450 | 846-Lng-A-T  | 87   | chr11:26789350-26789450 |
| chr11 | 26802950 | 26803050 | 1065-Lng-B-T | 90   | chr11:26802950-26803050 |
| chr11 | 27007650 | 27007750 | 1065-Lng-A-T | 94   | chr11:27007650-27007750 |
| chr11 | 27118750 | 27118850 | 1151-Lng-A-T | 119  | chr11:27118750-27118850 |
| chr11 | 27175850 | 27175950 | 1223-Lng-B-T | 36   | chr11:27175850-27175950 |
| chr11 | 27300450 | 27300550 | 1152-Lng-A-T | 227  | chr11:27300450-27300550 |
| chr11 | 27367050 | 27367150 | 1223-Lng-A-T | 87   | chr11:27367050-27367150 |
| chr11 | 27381750 | 27381850 | 1065-Lng-A-T | 46   | chr11:27381750-27381850 |
| chr11 | 27393950 | 27394050 | 1188-Lng-A-T | 35   | chr11:27393950-27394050 |
| chr11 | 27411850 | 27411950 | 1072-Lng-A-T | 82   | chr11:27411850-27411950 |
| chr11 | 27495650 | 27495750 | 1004-Lng-A-T | 60   | chr11:27495650-27495750 |
| chr11 | 27688150 | 27688250 | 1223-Lng-B-T | 76   | chr11:27688150-27688250 |
| chr11 | 27732550 | 27732650 | 1152-Lng-A-T | 219  | chr11:27732550-27732650 |

**Table S2: SB Insertion regions**

|       |          |          |              |     |                         |
|-------|----------|----------|--------------|-----|-------------------------|
| chr11 | 27956350 | 27956450 | 1152-Lng-A-T | 91  | chr11:27956350-27956450 |
| chr11 | 28117850 | 28117950 | 1065-Lng-A-T | 65  | chr11:28117850-28117950 |
| chr11 | 28170050 | 28170150 | 1065-Lng-C-T | 61  | chr11:28170050-28170150 |
| chr11 | 28275050 | 28275150 | 1065-Lng-C-T | 74  | chr11:28275050-28275150 |
| chr11 | 28292850 | 28292950 | 901-Lng-B-T  | 161 | chr11:28292850-28292950 |
| chr11 | 28321950 | 28322050 | 1065-Lng-C-T | 73  | chr11:28321950-28322050 |
| chr11 | 28424950 | 28425050 | 846-Lng-A-T  | 123 | chr11:28424950-28425050 |
| chr11 | 28446550 | 28446650 | 1274-Lng-A-T | 84  | chr11:28446550-28446650 |
| chr11 | 28587350 | 28587450 | 1004-Lng-A-T | 70  | chr11:28587350-28587450 |
| chr11 | 28755850 | 28755950 | 1065-Lng-A-T | 75  | chr11:28755850-28755950 |
| chr11 | 28766350 | 28766450 | 1065-Lng-B-T | 51  | chr11:28766350-28766450 |
| chr11 | 28827550 | 28827650 | 1167-Lng-A-T | 78  | chr11:28827550-28827650 |
| chr11 | 29060050 | 29060150 | 1223-Lng-B-T | 137 | chr11:29060050-29060150 |
| chr11 | 29074150 | 29074250 | 1100-Lng-A-T | 109 | chr11:29074150-29074250 |
| chr11 | 29094750 | 29094850 | 1072-Lng-A-T | 56  | chr11:29094750-29094850 |
| chr11 | 29122950 | 29123050 | 1223-Lng-D-T | 48  | chr11:29122950-29123050 |
| chr11 | 29128550 | 29128650 | 1274-Lng-A-T | 103 | chr11:29128550-29128650 |
| chr11 | 29132750 | 29132850 | 1090-Lng-A-T | 61  | chr11:29132750-29132850 |
| chr11 | 29350650 | 29350750 | 1100-Lng-A-T | 72  | chr11:29350650-29350750 |
| chr11 | 29445550 | 29445650 | 1151-Lng-A-T | 217 | chr11:29445550-29445650 |
| chr11 | 29463450 | 29463550 | 1065-Lng-A-T | 41  | chr11:29463450-29463550 |
| chr11 | 29605750 | 29605850 | 1090-Lng-A-T | 385 | chr11:29605750-29605850 |
| chr11 | 29610650 | 29610750 | 846-Lng-A-T  | 86  | chr11:29610650-29610750 |
| chr11 | 29618650 | 29618750 | 1152-Lng-A-T | 58  | chr11:29618650-29618750 |
| chr11 | 29638750 | 29638850 | 1065-Lng-B-T | 57  | chr11:29638750-29638850 |
| chr11 | 29816350 | 29816450 | 1004-Lng-A-T | 107 | chr11:29816350-29816450 |
| chr11 | 29823650 | 29823750 | 1065-Lng-A-T | 88  | chr11:29823650-29823750 |
| chr11 | 29913150 | 29913250 | 1090-Lng-A-T | 49  | chr11:29913150-29913250 |
| chr11 | 30001350 | 30001450 | 1065-Lng-A-T | 54  | chr11:30001350-30001450 |
| chr11 | 30001550 | 30001650 | 1274-Lng-A-T | 61  | chr11:30001550-30001650 |
| chr11 | 30008750 | 30008850 | 901-Lng-D-T  | 106 | chr11:30008750-30008850 |
| chr11 | 30009250 | 30009350 | 901-Lng-C-T  | 197 | chr11:30009250-30009350 |
| chr11 | 30068050 | 30068150 | 1223-Lng-D-T | 40  | chr11:30068050-30068150 |
| chr11 | 30087650 | 30087750 | 1223-Lng-A-T | 584 | chr11:30087650-30087750 |
| chr11 | 30090250 | 30090350 | 1090-Lng-B-T | 87  | chr11:30090250-30090350 |
| chr11 | 30095850 | 30095950 | 1188-Lng-A-T | 69  | chr11:30095850-30095950 |
| chr11 | 30099850 | 30099950 | 901-Lng-A-T  | 82  | chr11:30099850-30099950 |
| chr11 | 30104850 | 30104950 | 1004-Lng-A-T | 64  | chr11:30104850-30104950 |
| chr11 | 30157550 | 30157650 | 1274-Lng-A-T | 60  | chr11:30157550-30157650 |
| chr11 | 30163750 | 30163850 | 1090-Lng-A-T | 60  | chr11:30163750-30163850 |
| chr11 | 30527350 | 30527450 | 1223-Lng-A-T | 61  | chr11:30527350-30527450 |
| chr11 | 30684350 | 30684450 | 901-Lng-C-T  | 54  | chr11:30684350-30684450 |
| chr11 | 30685950 | 30686050 | 846-Lng-A-T  | 74  | chr11:30685950-30686050 |
| chr11 | 30695250 | 30695350 | 1274-Lng-A-T | 135 | chr11:30695250-30695350 |
| chr11 | 30723850 | 30723950 | 1188-Lng-A-T | 310 | chr11:30723850-30723950 |
| chr11 | 30744950 | 30745050 | 901-Lng-C-T  | 67  | chr11:30744950-30745050 |

**Table S2: SB Insertion regions**

|       |          |          |              |      |                         |
|-------|----------|----------|--------------|------|-------------------------|
| chr11 | 30751650 | 30751750 | 846-Lng-A-T  | 387  | chr11:30751650-30751750 |
| chr11 | 30760150 | 30760250 | 901-Lng-B-T  | 278  | chr11:30760150-30760250 |
| chr11 | 30776950 | 30777050 | 1223-Lng-A-T | 168  | chr11:30776950-30777050 |
| chr11 | 30884650 | 30884750 | 901-Lng-C-T  | 46   | chr11:30884650-30884750 |
| chr11 | 30918550 | 30918650 | 901-Lng-A-T  | 264  | chr11:30918550-30918650 |
| chr11 | 30949950 | 30950050 | 1065-Lng-C-T | 2786 | chr11:30949950-30950050 |
| chr11 | 30965650 | 30965750 | 1065-Lng-B-T | 40   | chr11:30965650-30965750 |
| chr11 | 30984350 | 30984450 | 1274-Lng-A-T | 120  | chr11:30984350-30984450 |
| chr11 | 31091450 | 31091550 | 846-Lng-A-T  | 62   | chr11:31091450-31091550 |
| chr11 | 31365850 | 31365950 | 1223-Lng-C-T | 50   | chr11:31365850-31365950 |
| chr11 | 31613950 | 31614050 | 1223-Lng-A-T | 95   | chr11:31613950-31614050 |
| chr11 | 31661050 | 31661150 | 1065-Lng-B-T | 61   | chr11:31661050-31661150 |
| chr11 | 31694350 | 31694450 | 1065-Lng-C-T | 90   | chr11:31694350-31694450 |
| chr11 | 31704650 | 31704750 | 1151-Lng-A-T | 66   | chr11:31704650-31704750 |
| chr11 | 31775050 | 31775150 | 1167-Lng-A-T | 116  | chr11:31775050-31775150 |
| chr11 | 31778550 | 31778650 | 901-Lng-D-T  | 139  | chr11:31778550-31778650 |
| chr11 | 31824450 | 31824550 | 1223-Lng-D-T | 50   | chr11:31824450-31824550 |
| chr11 | 31899250 | 31899350 | 1188-Lng-A-T | 84   | chr11:31899250-31899350 |
| chr11 | 32145150 | 32145250 | 1065-Lng-C-T | 70   | chr11:32145150-32145250 |
| chr11 | 32149350 | 32149450 | 1274-Lng-A-T | 102  | chr11:32149350-32149450 |
| chr11 | 32164650 | 32164750 | 901-Lng-A-T  | 344  | chr11:32164650-32164750 |
| chr11 | 32220250 | 32220350 | 1188-Lng-A-T | 85   | chr11:32220250-32220350 |
| chr11 | 32353050 | 32353150 | 1004-Lng-A-T | 95   | chr11:32353050-32353150 |
| chr11 | 32356950 | 32357050 | 901-Lng-C-T  | 118  | chr11:32356950-32357050 |
| chr11 | 32364450 | 32364550 | 1152-Lng-A-T | 43   | chr11:32364450-32364550 |
| chr11 | 32400350 | 32400450 | 1100-Lng-A-T | 59   | chr11:32400350-32400450 |
| chr11 | 32408550 | 32408650 | 1223-Lng-B-T | 186  | chr11:32408550-32408650 |
| chr11 | 32509650 | 32509750 | 1072-Lng-A-T | 93   | chr11:32509650-32509750 |
| chr11 | 32575450 | 32575550 | 1152-Lng-A-T | 48   | chr11:32575450-32575550 |
| chr11 | 32582650 | 32582750 | 1152-Lng-A-T | 90   | chr11:32582650-32582750 |
| chr11 | 32585750 | 32585850 | 1274-Lng-A-T | 49   | chr11:32585750-32585850 |
| chr11 | 32589950 | 32590050 | 1151-Lng-A-T | 248  | chr11:32589950-32590050 |
| chr11 | 32598750 | 32598850 | 1072-Lng-A-T | 63   | chr11:32598750-32598850 |
| chr11 | 32603950 | 32604050 | 1167-Lng-A-T | 475  | chr11:32603950-32604050 |
| chr11 | 32617450 | 32617550 | 1065-Lng-B-T | 132  | chr11:32617450-32617550 |
| chr11 | 32640750 | 32640850 | 1100-Lng-A-T | 69   | chr11:32640750-32640850 |
| chr11 | 32727450 | 32727550 | 1090-Lng-B-T | 421  | chr11:32727450-32727550 |
| chr11 | 32935450 | 32935550 | 901-Lng-A-T  | 52   | chr11:32935450-32935550 |
| chr11 | 33355950 | 33356050 | 1065-Lng-A-T | 41   | chr11:33355950-33356050 |
| chr11 | 33935650 | 33935750 | 1065-Lng-B-T | 78   | chr11:33935650-33935750 |
| chr11 | 34003850 | 34003950 | 1188-Lng-A-T | 51   | chr11:34003850-34003950 |
| chr11 | 34012550 | 34012650 | 1100-Lng-A-T | 129  | chr11:34012550-34012650 |
| chr11 | 34240550 | 34240650 | 1004-Lng-A-T | 231  | chr11:34240550-34240650 |
| chr11 | 34244050 | 34244150 | 1065-Lng-B-T | 52   | chr11:34244050-34244150 |
| chr11 | 34263150 | 34263250 | 1090-Lng-A-T | 62   | chr11:34263150-34263250 |
| chr11 | 34304250 | 34304350 | 901-Lng-C-T  | 264  | chr11:34304250-34304350 |

**Table S2: SB Insertion regions**

|       |          |          |              |      |                         |
|-------|----------|----------|--------------|------|-------------------------|
| chr11 | 34438650 | 34438750 | 1223-Lng-A-T | 466  | chr11:34438650-34438750 |
| chr11 | 34821350 | 34821450 | 901-Lng-C-T  | 73   | chr11:34821350-34821450 |
| chr11 | 35006450 | 35006550 | 1065-Lng-B-T | 75   | chr11:35006450-35006550 |
| chr11 | 35371850 | 35371950 | 901-Lng-C-T  | 183  | chr11:35371850-35371950 |
| chr11 | 35586450 | 35586550 | 1090-Lng-A-T | 98   | chr11:35586450-35586550 |
| chr11 | 35593350 | 35593450 | 901-Lng-A-T  | 73   | chr11:35593350-35593450 |
| chr11 | 35594550 | 35594650 | 1065-Lng-B-T | 47   | chr11:35594550-35594650 |
| chr11 | 35634550 | 35634650 | 1188-Lng-A-T | 158  | chr11:35634550-35634650 |
| chr11 | 35674950 | 35675050 | 1167-Lng-A-T | 47   | chr11:35674950-35675050 |
| chr11 | 35702050 | 35702150 | 1151-Lng-A-T | 67   | chr11:35702050-35702150 |
| chr11 | 35710750 | 35710850 | 1100-Lng-B-T | 56   | chr11:35710750-35710850 |
| chr11 | 35723950 | 35724050 | 1223-Lng-A-T | 82   | chr11:35723950-35724050 |
| chr11 | 35779150 | 35779250 | 1065-Lng-B-T | 40   | chr11:35779150-35779250 |
| chr11 | 35785550 | 35785650 | 1223-Lng-A-T | 2727 | chr11:35785550-35785650 |
| chr11 | 35849150 | 35849250 | 1223-Lng-C-T | 285  | chr11:35849150-35849250 |
| chr11 | 36006050 | 36006150 | 1152-Lng-A-T | 125  | chr11:36006050-36006150 |
| chr11 | 36087850 | 36087950 | 1274-Lng-A-T | 157  | chr11:36087850-36087950 |
| chr11 | 36096650 | 36096750 | 1223-Lng-C-T | 49   | chr11:36096650-36096750 |
| chr11 | 36123350 | 36123450 | 1090-Lng-A-T | 51   | chr11:36123350-36123450 |
| chr11 | 36364450 | 36364550 | 1223-Lng-A-T | 66   | chr11:36364450-36364550 |
| chr11 | 36484050 | 36484150 | 1065-Lng-B-T | 570  | chr11:36484050-36484150 |
| chr11 | 36580950 | 36581050 | 1152-Lng-A-T | 79   | chr11:36580950-36581050 |
| chr11 | 36778550 | 36778650 | 1065-Lng-A-T | 41   | chr11:36778550-36778650 |
| chr11 | 36798650 | 36798750 | 1065-Lng-A-T | 65   | chr11:36798650-36798750 |
| chr11 | 36869950 | 36870050 | 1223-Lng-B-T | 36   | chr11:36869950-36870050 |
| chr11 | 36920150 | 36920250 | 1065-Lng-A-T | 132  | chr11:36920150-36920250 |
| chr11 | 37009050 | 37009150 | 1167-Lng-A-T | 66   | chr11:37009050-37009150 |
| chr11 | 37204250 | 37204350 | 1065-Lng-C-T | 75   | chr11:37204250-37204350 |
| chr11 | 37643750 | 37643850 | 1152-Lng-A-T | 149  | chr11:37643750-37643850 |
| chr11 | 37712150 | 37712250 | 1152-Lng-A-T | 321  | chr11:37712150-37712250 |
| chr11 | 37715150 | 37715250 | 1065-Lng-B-T | 67   | chr11:37715150-37715250 |
| chr11 | 37779050 | 37779150 | 1004-Lng-A-T | 128  | chr11:37779050-37779150 |
| chr11 | 37964550 | 37964650 | 1223-Lng-B-T | 227  | chr11:37964550-37964650 |
| chr11 | 38077150 | 38077250 | 901-Lng-A-T  | 102  | chr11:38077150-38077250 |
| chr11 | 38122050 | 38122150 | 901-Lng-B-T  | 58   | chr11:38122050-38122150 |
| chr11 | 38492750 | 38492850 | 901-Lng-C-T  | 133  | chr11:38492750-38492850 |
| chr11 | 38660750 | 38660850 | 846-Lng-A-T  | 95   | chr11:38660750-38660850 |
| chr11 | 38815550 | 38815650 | 1072-Lng-A-T | 119  | chr11:38815550-38815650 |
| chr11 | 38945650 | 38945750 | 901-Lng-B-T  | 132  | chr11:38945650-38945750 |
| chr11 | 39068450 | 39068550 | 1065-Lng-A-T | 64   | chr11:39068450-39068550 |
| chr11 | 39083550 | 39083650 | 1065-Lng-C-T | 91   | chr11:39083550-39083650 |
| chr11 | 39121950 | 39122050 | 901-Lng-B-T  | 86   | chr11:39121950-39122050 |
| chr11 | 39150750 | 39150850 | 1072-Lng-A-T | 93   | chr11:39150750-39150850 |
| chr11 | 39216250 | 39216350 | 901-Lng-C-T  | 50   | chr11:39216250-39216350 |
| chr11 | 39248850 | 39248950 | 1100-Lng-A-T | 104  | chr11:39248850-39248950 |
| chr11 | 39369150 | 39369250 | 901-Lng-A-T  | 62   | chr11:39369150-39369250 |

**Table S2: SB Insertion regions**

|       |          |          |              |     |                         |
|-------|----------|----------|--------------|-----|-------------------------|
| chr11 | 39568350 | 39568450 | 1090-Lng-B-T | 269 | chr11:39568350-39568450 |
| chr11 | 40063950 | 40064050 | 901-Lng-B-T  | 197 | chr11:40063950-40064050 |
| chr11 | 40290150 | 40290250 | 901-Lng-B-T  | 256 | chr11:40290150-40290250 |
| chr11 | 40330350 | 40330450 | 1223-Lng-A-T | 51  | chr11:40330350-40330450 |
| chr11 | 40559750 | 40559850 | 846-Lng-A-T  | 102 | chr11:40559750-40559850 |
| chr11 | 40577150 | 40577250 | 846-Lng-A-T  | 48  | chr11:40577150-40577250 |
| chr11 | 40609450 | 40609550 | 1188-Lng-A-T | 50  | chr11:40609450-40609550 |
| chr11 | 40640050 | 40640150 | 1100-Lng-A-T | 66  | chr11:40640050-40640150 |
| chr11 | 40730250 | 40730350 | 1100-Lng-A-T | 79  | chr11:40730250-40730350 |
| chr11 | 40825250 | 40825350 | 1065-Lng-A-T | 82  | chr11:40825250-40825350 |
| chr11 | 40888750 | 40888850 | 1100-Lng-A-T | 77  | chr11:40888750-40888850 |
| chr11 | 40937850 | 40937950 | 1223-Lng-D-T | 49  | chr11:40937850-40937950 |
| chr11 | 40973750 | 40973850 | 901-Lng-C-T  | 49  | chr11:40973750-40973850 |
| chr11 | 41021050 | 41021150 | 1072-Lng-A-T | 53  | chr11:41021050-41021150 |
| chr11 | 41263650 | 41263750 | 1223-Lng-C-T | 45  | chr11:41263650-41263750 |
| chr11 | 41341250 | 41341350 | 1100-Lng-A-T | 54  | chr11:41341250-41341350 |
| chr11 | 41457950 | 41458050 | 1188-Lng-A-T | 36  | chr11:41457950-41458050 |
| chr11 | 41516350 | 41516450 | 1090-Lng-A-T | 74  | chr11:41516350-41516450 |
| chr11 | 41646950 | 41647050 | 1274-Lng-A-T | 408 | chr11:41646950-41647050 |
| chr11 | 41668650 | 41668750 | 1004-Lng-A-T | 58  | chr11:41668650-41668750 |
| chr11 | 41755250 | 41755350 | 1223-Lng-A-T | 128 | chr11:41755250-41755350 |
| chr11 | 41956650 | 41956750 | 901-Lng-B-T  | 72  | chr11:41956650-41956750 |
| chr11 | 42076450 | 42076550 | 1167-Lng-A-T | 64  | chr11:42076450-42076550 |
| chr11 | 42179650 | 42179750 | 1151-Lng-A-T | 57  | chr11:42179650-42179750 |
| chr11 | 42298950 | 42299050 | 1072-Lng-A-T | 66  | chr11:42298950-42299050 |
| chr11 | 42333850 | 42333950 | 1072-Lng-A-T | 157 | chr11:42333850-42333950 |
| chr11 | 42434450 | 42434550 | 1167-Lng-A-T | 68  | chr11:42434450-42434550 |
| chr11 | 42699050 | 42699150 | 1065-Lng-C-T | 85  | chr11:42699050-42699150 |
| chr11 | 42810850 | 42810950 | 901-Lng-D-T  | 42  | chr11:42810850-42810950 |
| chr11 | 43243650 | 43243750 | 901-Lng-B-T  | 36  | chr11:43243650-43243750 |
| chr11 | 43341850 | 43341950 | 1188-Lng-A-T | 34  | chr11:43341850-43341950 |
| chr11 | 43521750 | 43521850 | 901-Lng-A-T  | 94  | chr11:43521750-43521850 |
| chr11 | 43663450 | 43663550 | 1152-Lng-A-T | 265 | chr11:43663450-43663550 |
| chr11 | 43690750 | 43690850 | 1274-Lng-A-T | 72  | chr11:43690750-43690850 |
| chr11 | 43718050 | 43718150 | 1065-Lng-C-T | 75  | chr11:43718050-43718150 |
| chr11 | 43948950 | 43949050 | 1065-Lng-A-T | 90  | chr11:43948950-43949050 |
| chr11 | 44027550 | 44027650 | 1065-Lng-B-T | 74  | chr11:44027550-44027650 |
| chr11 | 44034250 | 44034350 | 1274-Lng-A-T | 140 | chr11:44034250-44034350 |
| chr11 | 44110150 | 44110250 | 1188-Lng-A-T | 54  | chr11:44110150-44110250 |
| chr11 | 44273350 | 44273450 | 1151-Lng-A-T | 114 | chr11:44273350-44273450 |
| chr11 | 44502350 | 44502450 | 1223-Lng-B-T | 67  | chr11:44502350-44502450 |
| chr11 | 44526950 | 44527050 | 846-Lng-A-T  | 144 | chr11:44526950-44527050 |
| chr11 | 45216650 | 45216750 | 901-Lng-B-T  | 120 | chr11:45216650-45216750 |
| chr11 | 45216950 | 45217050 | 1065-Lng-B-T | 39  | chr11:45216950-45217050 |
| chr11 | 45410150 | 45410250 | 1223-Lng-B-T | 300 | chr11:45410150-45410250 |
| chr11 | 45678750 | 45678850 | 901-Lng-B-T  | 113 | chr11:45678750-45678850 |

**Table S2: SB Insertion regions**

|       |          |          |              |      |                         |
|-------|----------|----------|--------------|------|-------------------------|
| chr11 | 45685950 | 45686050 | 1065-Lng-C-T | 190  | chr11:45685950-45686050 |
| chr11 | 45820750 | 45820850 | 1274-Lng-A-T | 71   | chr11:45820750-45820850 |
| chr11 | 45888650 | 45888750 | 1223-Lng-A-T | 308  | chr11:45888650-45888750 |
| chr11 | 45893750 | 45893850 | 1065-Lng-A-T | 94   | chr11:45893750-45893850 |
| chr11 | 45894650 | 45894750 | 1004-Lng-A-T | 60   | chr11:45894650-45894750 |
| chr11 | 45896050 | 45896150 | 901-Lng-C-T  | 93   | chr11:45896050-45896150 |
| chr11 | 45907650 | 45907750 | 1274-Lng-A-T | 100  | chr11:45907650-45907750 |
| chr11 | 45917750 | 45917850 | 1090-Lng-A-T | 44   | chr11:45917750-45917850 |
| chr11 | 46142050 | 46142150 | 901-Lng-D-T  | 354  | chr11:46142050-46142150 |
| chr11 | 46353050 | 46353150 | 1065-Lng-A-T | 70   | chr11:46353050-46353150 |
| chr11 | 46581850 | 46581950 | 901-Lng-C-T  | 40   | chr11:46581850-46581950 |
| chr11 | 46640650 | 46640750 | 1090-Lng-B-T | 506  | chr11:46640650-46640750 |
| chr11 | 46804950 | 46805050 | 901-Lng-C-T  | 36   | chr11:46804950-46805050 |
| chr11 | 46875450 | 46875550 | 1090-Lng-B-T | 312  | chr11:46875450-46875550 |
| chr11 | 47096950 | 47097050 | 1065-Lng-C-T | 66   | chr11:47096950-47097050 |
| chr11 | 47188950 | 47189050 | 1065-Lng-B-T | 76   | chr11:47188950-47189050 |
| chr11 | 47206350 | 47206450 | 1223-Lng-B-T | 38   | chr11:47206350-47206450 |
| chr11 | 47301150 | 47301250 | 1072-Lng-A-T | 54   | chr11:47301150-47301250 |
| chr11 | 47382650 | 47382750 | 1090-Lng-B-T | 287  | chr11:47382650-47382750 |
| chr11 | 47755250 | 47755350 | 1065-Lng-A-T | 375  | chr11:47755250-47755350 |
| chr11 | 47774650 | 47774750 | 1065-Lng-A-T | 44   | chr11:47774650-47774750 |
| chr11 | 48200650 | 48200750 | 1223-Lng-C-T | 43   | chr11:48200650-48200750 |
| chr11 | 48239950 | 48240050 | 846-Lng-A-T  | 96   | chr11:48239950-48240050 |
| chr11 | 48477750 | 48477850 | 901-Lng-A-T  | 57   | chr11:48477750-48477850 |
| chr11 | 48573550 | 48573650 | 1152-Lng-A-T | 114  | chr11:48573550-48573650 |
| chr11 | 49019550 | 49019650 | 1223-Lng-A-T | 1384 | chr11:49019550-49019650 |
| chr11 | 49024150 | 49024250 | 846-Lng-A-T  | 125  | chr11:49024150-49024250 |
| chr11 | 49026450 | 49026550 | 901-Lng-D-T  | 319  | chr11:49026450-49026550 |
| chr11 | 49026550 | 49026650 | 1274-Lng-A-T | 66   | chr11:49026550-49026650 |
| chr11 | 49033750 | 49033850 | 1072-Lng-A-T | 202  | chr11:49033750-49033850 |
| chr11 | 49840050 | 49840150 | 1100-Lng-A-T | 119  | chr11:49840050-49840150 |
| chr11 | 49877950 | 49878050 | 1004-Lng-A-T | 95   | chr11:49877950-49878050 |
| chr11 | 49886750 | 49886850 | 1223-Lng-D-T | 51   | chr11:49886750-49886850 |
| chr11 | 49893050 | 49893150 | 1065-Lng-C-T | 109  | chr11:49893050-49893150 |
| chr11 | 49914350 | 49914450 | 901-Lng-A-T  | 67   | chr11:49914350-49914450 |
| chr11 | 49999450 | 49999550 | 1274-Lng-A-T | 60   | chr11:49999450-49999550 |
| chr11 | 50017950 | 50018050 | 1152-Lng-A-T | 61   | chr11:50017950-50018050 |
| chr11 | 50081350 | 50081450 | 1188-Lng-A-T | 76   | chr11:50081350-50081450 |
| chr11 | 50089050 | 50089150 | 1152-Lng-A-T | 69   | chr11:50089050-50089150 |
| chr11 | 50149350 | 50149450 | 1274-Lng-A-T | 169  | chr11:50149350-50149450 |
| chr11 | 50666350 | 50666450 | 1065-Lng-B-T | 58   | chr11:50666350-50666450 |
| chr11 | 51071850 | 51071950 | 1065-Lng-C-T | 73   | chr11:51071850-51071950 |
| chr11 | 51149750 | 51149850 | 1223-Lng-D-T | 66   | chr11:51149750-51149850 |
| chr11 | 51239650 | 51239750 | 1188-Lng-A-T | 52   | chr11:51239650-51239750 |
| chr11 | 51510250 | 51510350 | 1151-Lng-A-T | 168  | chr11:51510250-51510350 |
| chr11 | 51579550 | 51579650 | 901-Lng-B-T  | 168  | chr11:51579550-51579650 |



**Table S2: SB Insertion regions**

|       |          |          |              |     |                         |
|-------|----------|----------|--------------|-----|-------------------------|
| chr11 | 51599150 | 51599250 | 1100-Lng-A-T | 58  | chr11:51599150-51599250 |
| chr11 | 51651450 | 51651550 | 1151-Lng-A-T | 56  | chr11:51651450-51651550 |
| chr11 | 51655450 | 51655550 | 1223-Lng-B-T | 54  | chr11:51655450-51655550 |
| chr11 | 51806250 | 51806350 | 1167-Lng-A-T | 105 | chr11:51806250-51806350 |
| chr11 | 51806850 | 51806950 | 1100-Lng-B-T | 60  | chr11:51806850-51806950 |
| chr11 | 51934250 | 51934350 | 901-Lng-C-T  | 66  | chr11:51934250-51934350 |
| chr11 | 52190350 | 52190450 | 901-Lng-B-T  | 143 | chr11:52190350-52190450 |
| chr11 | 52190350 | 52190450 | 1188-Lng-A-T | 81  | chr11:52190350-52190450 |
| chr11 | 52307150 | 52307250 | 1167-Lng-A-T | 116 | chr11:52307150-52307250 |
| chr11 | 52320150 | 52320250 | 1223-Lng-A-T | 912 | chr11:52320150-52320250 |
| chr11 | 52499450 | 52499550 | 1090-Lng-A-T | 65  | chr11:52499450-52499550 |
| chr11 | 52861250 | 52861350 | 1100-Lng-A-T | 149 | chr11:52861250-52861350 |
| chr11 | 53094450 | 53094550 | 1090-Lng-A-T | 63  | chr11:53094450-53094550 |
| chr11 | 53099450 | 53099550 | 1100-Lng-A-T | 53  | chr11:53099450-53099550 |
| chr11 | 53185550 | 53185650 | 1072-Lng-A-T | 238 | chr11:53185550-53185650 |
| chr11 | 53189250 | 53189350 | 1100-Lng-A-T | 63  | chr11:53189250-53189350 |
| chr11 | 53195550 | 53195650 | 1274-Lng-A-T | 67  | chr11:53195550-53195650 |
| chr11 | 53215150 | 53215250 | 1223-Lng-C-T | 50  | chr11:53215150-53215250 |
| chr11 | 53340250 | 53340350 | 901-Lng-B-T  | 54  | chr11:53340250-53340350 |
| chr11 | 53665850 | 53665950 | 901-Lng-C-T  | 62  | chr11:53665850-53665950 |
| chr11 | 53669050 | 53669150 | 1152-Lng-A-T | 45  | chr11:53669050-53669150 |
| chr11 | 53812250 | 53812350 | 1223-Lng-D-T | 69  | chr11:53812250-53812350 |
| chr11 | 53907650 | 53907750 | 1065-Lng-B-T | 48  | chr11:53907650-53907750 |
| chr11 | 54066350 | 54066450 | 1090-Lng-A-T | 82  | chr11:54066350-54066450 |
| chr11 | 54260650 | 54260750 | 901-Lng-A-T  | 135 | chr11:54260650-54260750 |
| chr11 | 54269450 | 54269550 | 1065-Lng-B-T | 46  | chr11:54269450-54269550 |
| chr11 | 54402150 | 54402250 | 901-Lng-C-T  | 96  | chr11:54402150-54402250 |
| chr11 | 54415650 | 54415750 | 1065-Lng-A-T | 53  | chr11:54415650-54415750 |
| chr11 | 54418150 | 54418250 | 1274-Lng-A-T | 90  | chr11:54418150-54418250 |
| chr11 | 54440350 | 54440450 | 1100-Lng-A-T | 165 | chr11:54440350-54440450 |
| chr11 | 54467550 | 54467650 | 1090-Lng-A-T | 111 | chr11:54467550-54467650 |
| chr11 | 54467650 | 54467750 | 1065-Lng-B-T | 39  | chr11:54467650-54467750 |
| chr11 | 54494850 | 54494950 | 1223-Lng-D-T | 54  | chr11:54494850-54494950 |
| chr11 | 54572450 | 54572550 | 1090-Lng-B-T | 379 | chr11:54572450-54572550 |
| chr11 | 54577350 | 54577450 | 1100-Lng-A-T | 89  | chr11:54577350-54577450 |
| chr11 | 54585350 | 54585450 | 1100-Lng-A-T | 135 | chr11:54585350-54585450 |
| chr11 | 54733750 | 54733850 | 1090-Lng-B-T | 216 | chr11:54733750-54733850 |
| chr11 | 54956050 | 54956150 | 846-Lng-A-T  | 122 | chr11:54956050-54956150 |
| chr11 | 55167150 | 55167250 | 1152-Lng-A-T | 267 | chr11:55167150-55167250 |
| chr11 | 55310750 | 55310850 | 901-Lng-A-T  | 56  | chr11:55310750-55310850 |
| chr11 | 55321550 | 55321650 | 1072-Lng-A-T | 55  | chr11:55321550-55321650 |
| chr11 | 55369350 | 55369450 | 901-Lng-B-T  | 47  | chr11:55369350-55369450 |
| chr11 | 55633650 | 55633750 | 1188-Lng-A-T | 90  | chr11:55633650-55633750 |
| chr11 | 55668650 | 55668750 | 846-Lng-A-T  | 386 | chr11:55668650-55668750 |
| chr11 | 55683450 | 55683550 | 1223-Lng-D-T | 45  | chr11:55683450-55683550 |
| chr11 | 56015850 | 56015950 | 846-Lng-A-T  | 76  | chr11:56015850-56015950 |

**Table S2: SB Insertion regions**

|       |          |          |              |     |                         |
|-------|----------|----------|--------------|-----|-------------------------|
| chr11 | 56299750 | 56299850 | 1072-Lng-A-T | 160 | chr11:56299750-56299850 |
| chr11 | 56699350 | 56699450 | 1065-Lng-C-T | 71  | chr11:56699350-56699450 |
| chr11 | 57306150 | 57306250 | 846-Lng-A-T  | 97  | chr11:57306150-57306250 |
| chr11 | 57353250 | 57353350 | 901-Lng-D-T  | 56  | chr11:57353250-57353350 |
| chr11 | 57395650 | 57395750 | 901-Lng-B-T  | 180 | chr11:57395650-57395750 |
| chr11 | 57620350 | 57620450 | 1004-Lng-A-T | 54  | chr11:57620350-57620450 |
| chr11 | 57625950 | 57626050 | 901-Lng-C-T  | 60  | chr11:57625950-57626050 |
| chr11 | 57643550 | 57643650 | 1151-Lng-A-T | 61  | chr11:57643550-57643650 |
| chr11 | 57857650 | 57857750 | 846-Lng-A-T  | 48  | chr11:57857650-57857750 |
| chr11 | 57971050 | 57971150 | 1167-Lng-A-T | 52  | chr11:57971050-57971150 |
| chr11 | 58004350 | 58004450 | 1167-Lng-A-T | 134 | chr11:58004350-58004450 |
| chr11 | 58873650 | 58873750 | 901-Lng-C-T  | 29  | chr11:58873650-58873750 |
| chr11 | 59040050 | 59040150 | 1274-Lng-A-T | 109 | chr11:59040050-59040150 |
| chr11 | 59128750 | 59128850 | 1151-Lng-A-T | 205 | chr11:59128750-59128850 |
| chr11 | 59228150 | 59228250 | 1151-Lng-A-T | 79  | chr11:59228150-59228250 |
| chr11 | 59261850 | 59261950 | 1090-Lng-A-T | 68  | chr11:59261850-59261950 |
| chr11 | 59265050 | 59265150 | 901-Lng-C-T  | 33  | chr11:59265050-59265150 |
| chr11 | 59388150 | 59388250 | 1274-Lng-A-T | 77  | chr11:59388150-59388250 |
| chr11 | 59505750 | 59505850 | 1065-Lng-B-T | 46  | chr11:59505750-59505850 |
| chr11 | 59523350 | 59523450 | 901-Lng-C-T  | 56  | chr11:59523350-59523450 |
| chr11 | 59525550 | 59525650 | 1223-Lng-C-T | 44  | chr11:59525550-59525650 |
| chr11 | 59529550 | 59529650 | 1274-Lng-A-T | 151 | chr11:59529550-59529650 |
| chr11 | 59667550 | 59667650 | 1100-Lng-A-T | 89  | chr11:59667550-59667650 |
| chr11 | 59670750 | 59670850 | 1065-Lng-A-T | 49  | chr11:59670750-59670850 |
| chr11 | 59672750 | 59672850 | 1274-Lng-A-T | 72  | chr11:59672750-59672850 |
| chr11 | 59837750 | 59837850 | 1004-Lng-A-T | 50  | chr11:59837750-59837850 |
| chr11 | 59932950 | 59933050 | 1223-Lng-A-T | 162 | chr11:59932950-59933050 |
| chr11 | 60102750 | 60102850 | 1152-Lng-A-T | 203 | chr11:60102750-60102850 |
| chr11 | 60114650 | 60114750 | 1152-Lng-A-T | 138 | chr11:60114650-60114750 |
| chr11 | 60221850 | 60221950 | 1100-Lng-A-T | 119 | chr11:60221850-60221950 |
| chr11 | 60285250 | 60285350 | 1167-Lng-A-T | 61  | chr11:60285250-60285350 |
| chr11 | 60560550 | 60560650 | 901-Lng-A-T  | 83  | chr11:60560550-60560650 |
| chr11 | 60702250 | 60702350 | 1065-Lng-C-T | 116 | chr11:60702250-60702350 |
| chr11 | 61040350 | 61040450 | 901-Lng-D-T  | 449 | chr11:61040350-61040450 |
| chr11 | 61334950 | 61335050 | 901-Lng-A-T  | 93  | chr11:61334950-61335050 |
| chr11 | 61364950 | 61365050 | 1274-Lng-A-T | 52  | chr11:61364950-61365050 |
| chr11 | 61387150 | 61387250 | 901-Lng-D-T  | 54  | chr11:61387150-61387250 |
| chr11 | 61616050 | 61616150 | 1065-Lng-A-T | 46  | chr11:61616050-61616150 |
| chr11 | 61642450 | 61642550 | 1004-Lng-A-T | 55  | chr11:61642450-61642550 |
| chr11 | 61678750 | 61678850 | 1152-Lng-A-T | 55  | chr11:61678750-61678850 |
| chr11 | 61714750 | 61714850 | 1004-Lng-A-T | 78  | chr11:61714750-61714850 |
| chr11 | 61737250 | 61737350 | 1100-Lng-A-T | 94  | chr11:61737250-61737350 |
| chr11 | 61892950 | 61893050 | 1152-Lng-A-T | 73  | chr11:61892950-61893050 |
| chr11 | 61922050 | 61922150 | 1152-Lng-A-T | 36  | chr11:61922050-61922150 |
| chr11 | 61930450 | 61930550 | 846-Lng-A-T  | 661 | chr11:61930450-61930550 |
| chr11 | 62014950 | 62015050 | 1004-Lng-A-T | 401 | chr11:62014950-62015050 |

**Table S2: SB Insertion regions**

|       |          |          |              |      |                         |
|-------|----------|----------|--------------|------|-------------------------|
| chr11 | 62034850 | 62034950 | 1167-Lng-A-T | 126  | chr11:62034850-62034950 |
| chr11 | 62042350 | 62042450 | 1004-Lng-A-T | 128  | chr11:62042350-62042450 |
| chr11 | 62078750 | 62078850 | 1152-Lng-A-T | 108  | chr11:62078750-62078850 |
| chr11 | 62120550 | 62120650 | 901-Lng-B-T  | 84   | chr11:62120550-62120650 |
| chr11 | 62120850 | 62120950 | 1100-Lng-A-T | 57   | chr11:62120850-62120950 |
| chr11 | 62139250 | 62139350 | 901-Lng-C-T  | 232  | chr11:62139250-62139350 |
| chr11 | 62186350 | 62186450 | 901-Lng-D-T  | 425  | chr11:62186350-62186450 |
| chr11 | 62224550 | 62224650 | 1274-Lng-A-T | 143  | chr11:62224550-62224650 |
| chr11 | 62250350 | 62250450 | 1188-Lng-A-T | 167  | chr11:62250350-62250450 |
| chr11 | 62275350 | 62275450 | 901-Lng-A-T  | 75   | chr11:62275350-62275450 |
| chr11 | 62361250 | 62361350 | 1223-Lng-B-T | 55   | chr11:62361250-62361350 |
| chr11 | 62641450 | 62641550 | 1274-Lng-A-T | 420  | chr11:62641450-62641550 |
| chr11 | 62701850 | 62701950 | 1065-Lng-A-T | 83   | chr11:62701850-62701950 |
| chr11 | 62762250 | 62762350 | 846-Lng-A-T  | 54   | chr11:62762250-62762350 |
| chr11 | 62808950 | 62809050 | 1152-Lng-A-T | 60   | chr11:62808950-62809050 |
| chr11 | 62812450 | 62812550 | 1100-Lng-A-T | 58   | chr11:62812450-62812550 |
| chr11 | 62871450 | 62871550 | 1004-Lng-A-T | 127  | chr11:62871450-62871550 |
| chr11 | 62909750 | 62909850 | 1188-Lng-A-T | 202  | chr11:62909750-62909850 |
| chr11 | 63055850 | 63055950 | 1274-Lng-A-T | 50   | chr11:63055850-63055950 |
| chr11 | 63319650 | 63319750 | 1223-Lng-B-T | 106  | chr11:63319650-63319750 |
| chr11 | 63451350 | 63451450 | 901-Lng-D-T  | 389  | chr11:63451350-63451450 |
| chr11 | 63546450 | 63546550 | 1065-Lng-B-T | 41   | chr11:63546450-63546550 |
| chr11 | 63808150 | 63808250 | 901-Lng-B-T  | 208  | chr11:63808150-63808250 |
| chr11 | 63811550 | 63811650 | 1223-Lng-D-T | 40   | chr11:63811550-63811650 |
| chr11 | 64032150 | 64032250 | 1004-Lng-A-T | 84   | chr11:64032150-64032250 |
| chr11 | 64317350 | 64317450 | 1223-Lng-A-T | 1331 | chr11:64317350-64317450 |
| chr11 | 64373550 | 64373650 | 1065-Lng-C-T | 82   | chr11:64373550-64373650 |
| chr11 | 64800450 | 64800550 | 1223-Lng-D-T | 49   | chr11:64800450-64800550 |
| chr11 | 64901350 | 64901450 | 901-Lng-A-T  | 57   | chr11:64901350-64901450 |
| chr11 | 64913150 | 64913250 | 1100-Lng-A-T | 104  | chr11:64913150-64913250 |
| chr11 | 64919650 | 64919750 | 901-Lng-A-T  | 103  | chr11:64919650-64919750 |
| chr11 | 65417150 | 65417250 | 901-Lng-A-T  | 78   | chr11:65417150-65417250 |
| chr11 | 65514950 | 65515050 | 1090-Lng-A-T | 74   | chr11:65514950-65515050 |
| chr11 | 65541150 | 65541250 | 901-Lng-C-T  | 31   | chr11:65541150-65541250 |
| chr11 | 65544350 | 65544450 | 1274-Lng-A-T | 120  | chr11:65544350-65544450 |
| chr11 | 65552550 | 65552650 | 1065-Lng-A-T | 1174 | chr11:65552550-65552650 |
| chr11 | 65600350 | 65600450 | 1274-Lng-A-T | 78   | chr11:65600350-65600450 |
| chr11 | 65623950 | 65624050 | 1072-Lng-A-T | 243  | chr11:65623950-65624050 |
| chr11 | 65627150 | 65627250 | 846-Lng-A-T  | 131  | chr11:65627150-65627250 |
| chr11 | 65640750 | 65640850 | 901-Lng-A-T  | 532  | chr11:65640750-65640850 |
| chr11 | 65799050 | 65799150 | 901-Lng-D-T  | 49   | chr11:65799050-65799150 |
| chr11 | 66044350 | 66044450 | 1223-Lng-A-T | 218  | chr11:66044350-66044450 |
| chr11 | 66067450 | 66067550 | 1167-Lng-A-T | 124  | chr11:66067450-66067550 |
| chr11 | 66229950 | 66230050 | 1167-Lng-A-T | 144  | chr11:66229950-66230050 |
| chr11 | 66260050 | 66260150 | 1072-Lng-A-T | 185  | chr11:66260050-66260150 |
| chr11 | 66399550 | 66399650 | 1090-Lng-A-T | 74   | chr11:66399550-66399650 |

**Table S2: SB Insertion regions**

|       |          |          |              |     |                         |
|-------|----------|----------|--------------|-----|-------------------------|
| chr11 | 66596550 | 66596650 | 1100-Lng-B-T | 54  | chr11:66596550-66596650 |
| chr11 | 66617250 | 66617350 | 901-Lng-C-T  | 89  | chr11:66617250-66617350 |
| chr11 | 66841250 | 66841350 | 1151-Lng-A-T | 131 | chr11:66841250-66841350 |
| chr11 | 67064750 | 67064850 | 1223-Lng-B-T | 69  | chr11:67064750-67064850 |
| chr11 | 67184850 | 67184950 | 901-Lng-A-T  | 69  | chr11:67184850-67184950 |
| chr11 | 67609950 | 67610050 | 1065-Lng-A-T | 40  | chr11:67609950-67610050 |
| chr11 | 67717050 | 67717150 | 1004-Lng-A-T | 62  | chr11:67717050-67717150 |
| chr11 | 67738350 | 67738450 | 901-Lng-A-T  | 97  | chr11:67738350-67738450 |
| chr11 | 67872250 | 67872350 | 1090-Lng-A-T | 84  | chr11:67872250-67872350 |
| chr11 | 67933550 | 67933650 | 1167-Lng-A-T | 53  | chr11:67933550-67933650 |
| chr11 | 68103350 | 68103450 | 1151-Lng-A-T | 460 | chr11:68103350-68103450 |
| chr11 | 68409550 | 68409650 | 901-Lng-B-T  | 117 | chr11:68409550-68409650 |
| chr11 | 68663650 | 68663750 | 1223-Lng-A-T | 214 | chr11:68663650-68663750 |
| chr11 | 68762450 | 68762550 | 1004-Lng-A-T | 192 | chr11:68762450-68762550 |
| chr11 | 69126550 | 69126650 | 1065-Lng-A-T | 73  | chr11:69126550-69126650 |
| chr11 | 69389050 | 69389150 | 1167-Lng-A-T | 76  | chr11:69389050-69389150 |
| chr11 | 69443350 | 69443450 | 1065-Lng-B-T | 170 | chr11:69443350-69443450 |
| chr11 | 69565350 | 69565450 | 1223-Lng-C-T | 53  | chr11:69565350-69565450 |
| chr11 | 69599450 | 69599550 | 1152-Lng-A-T | 103 | chr11:69599450-69599550 |
| chr11 | 69806650 | 69806750 | 1100-Lng-A-T | 81  | chr11:69806650-69806750 |
| chr11 | 69817850 | 69817950 | 901-Lng-B-T  | 232 | chr11:69817850-69817950 |
| chr11 | 70352850 | 70352950 | 1065-Lng-B-T | 62  | chr11:70352850-70352950 |
| chr11 | 70414650 | 70414750 | 1223-Lng-A-T | 66  | chr11:70414650-70414750 |
| chr11 | 70508350 | 70508450 | 1274-Lng-A-T | 97  | chr11:70508350-70508450 |
| chr11 | 70511950 | 70512050 | 1223-Lng-B-T | 42  | chr11:70511950-70512050 |
| chr11 | 70553850 | 70553950 | 1274-Lng-A-T | 113 | chr11:70553850-70553950 |
| chr11 | 70562150 | 70562250 | 1223-Lng-A-T | 117 | chr11:70562150-70562250 |
| chr11 | 70592350 | 70592450 | 1100-Lng-B-T | 123 | chr11:70592350-70592450 |
| chr11 | 70687950 | 70688050 | 1152-Lng-A-T | 153 | chr11:70687950-70688050 |
| chr11 | 70713550 | 70713650 | 1274-Lng-A-T | 158 | chr11:70713550-70713650 |
| chr11 | 70748450 | 70748550 | 901-Lng-C-T  | 79  | chr11:70748450-70748550 |
| chr11 | 70782350 | 70782450 | 1065-Lng-B-T | 71  | chr11:70782350-70782450 |
| chr11 | 70828650 | 70828750 | 1072-Lng-A-T | 57  | chr11:70828650-70828750 |
| chr11 | 70996950 | 70997050 | 901-Lng-D-T  | 44  | chr11:70996950-70997050 |
| chr11 | 71438950 | 71439050 | 1274-Lng-A-T | 161 | chr11:71438950-71439050 |
| chr11 | 72126950 | 72127050 | 1065-Lng-A-T | 78  | chr11:72126950-72127050 |
| chr11 | 72346150 | 72346250 | 1152-Lng-A-T | 83  | chr11:72346150-72346250 |
| chr11 | 72368750 | 72368850 | 1090-Lng-A-T | 77  | chr11:72368750-72368850 |
| chr11 | 72442250 | 72442350 | 1152-Lng-A-T | 40  | chr11:72442250-72442350 |
| chr11 | 72447950 | 72448050 | 1004-Lng-A-T | 82  | chr11:72447950-72448050 |
| chr11 | 72453550 | 72453650 | 1065-Lng-A-T | 50  | chr11:72453550-72453650 |
| chr11 | 72477850 | 72477950 | 1151-Lng-A-T | 94  | chr11:72477850-72477950 |
| chr11 | 72478750 | 72478850 | 846-Lng-A-T  | 162 | chr11:72478750-72478850 |
| chr11 | 72535750 | 72535850 | 1274-Lng-A-T | 104 | chr11:72535750-72535850 |
| chr11 | 72560550 | 72560650 | 901-Lng-A-T  | 245 | chr11:72560550-72560650 |
| chr11 | 72853650 | 72853750 | 1223-Lng-C-T | 168 | chr11:72853650-72853750 |

**Table S2: SB Insertion regions**

|       |          |          |              |     |                         |
|-------|----------|----------|--------------|-----|-------------------------|
| chr11 | 72867750 | 72867850 | 1223-Lng-B-T | 48  | chr11:72867750-72867850 |
| chr11 | 72871950 | 72872050 | 1188-Lng-A-T | 35  | chr11:72871950-72872050 |
| chr11 | 72972450 | 72972550 | 1100-Lng-A-T | 86  | chr11:72972450-72972550 |
| chr11 | 73020450 | 73020550 | 1065-Lng-B-T | 73  | chr11:73020450-73020550 |
| chr11 | 73148750 | 73148850 | 901-Lng-A-T  | 50  | chr11:73148750-73148850 |
| chr11 | 73532850 | 73532950 | 1004-Lng-A-T | 82  | chr11:73532850-73532950 |
| chr11 | 73601350 | 73601450 | 901-Lng-A-T  | 371 | chr11:73601350-73601450 |
| chr11 | 73609550 | 73609650 | 901-Lng-C-T  | 36  | chr11:73609550-73609650 |
| chr11 | 73812350 | 73812450 | 1004-Lng-A-T | 92  | chr11:73812350-73812450 |
| chr11 | 73838550 | 73838650 | 1090-Lng-A-T | 61  | chr11:73838550-73838650 |
| chr11 | 73994850 | 73994950 | 1072-Lng-A-T | 99  | chr11:73994850-73994950 |
| chr11 | 74306650 | 74306750 | 1065-Lng-A-T | 59  | chr11:74306650-74306750 |
| chr11 | 74341450 | 74341550 | 1065-Lng-A-T | 80  | chr11:74341450-74341550 |
| chr11 | 74420650 | 74420750 | 846-Lng-A-T  | 80  | chr11:74420650-74420750 |
| chr11 | 74493450 | 74493550 | 1100-Lng-A-T | 101 | chr11:74493450-74493550 |
| chr11 | 74523250 | 74523350 | 1274-Lng-A-T | 67  | chr11:74523250-74523350 |
| chr11 | 74642750 | 74642850 | 901-Lng-B-T  | 67  | chr11:74642750-74642850 |
| chr11 | 74657750 | 74657850 | 1065-Lng-A-T | 63  | chr11:74657750-74657850 |
| chr11 | 74716850 | 74716950 | 901-Lng-B-T  | 187 | chr11:74716850-74716950 |
| chr11 | 74768350 | 74768450 | 1100-Lng-B-T | 279 | chr11:74768350-74768450 |
| chr11 | 74792850 | 74792950 | 1100-Lng-A-T | 68  | chr11:74792850-74792950 |
| chr11 | 74805150 | 74805250 | 1065-Lng-B-T | 93  | chr11:74805150-74805250 |
| chr11 | 74824650 | 74824750 | 1004-Lng-A-T | 71  | chr11:74824650-74824750 |
| chr11 | 74848350 | 74848450 | 1065-Lng-A-T | 153 | chr11:74848350-74848450 |
| chr11 | 74859050 | 74859150 | 1223-Lng-A-T | 411 | chr11:74859050-74859150 |
| chr11 | 74860850 | 74860950 | 1090-Lng-A-T | 48  | chr11:74860850-74860950 |
| chr11 | 74929050 | 74929150 | 1065-Lng-A-T | 39  | chr11:74929050-74929150 |
| chr11 | 74938150 | 74938250 | 901-Lng-B-T  | 234 | chr11:74938150-74938250 |
| chr11 | 74945150 | 74945250 | 1274-Lng-A-T | 57  | chr11:74945150-74945250 |
| chr11 | 74961650 | 74961750 | 1100-Lng-A-T | 506 | chr11:74961650-74961750 |
| chr11 | 75031450 | 75031550 | 1274-Lng-A-T | 134 | chr11:75031450-75031550 |
| chr11 | 75039350 | 75039450 | 1100-Lng-A-T | 89  | chr11:75039350-75039450 |
| chr11 | 75181750 | 75181850 | 1065-Lng-A-T | 69  | chr11:75181750-75181850 |
| chr11 | 75236650 | 75236750 | 1223-Lng-C-T | 116 | chr11:75236650-75236750 |
| chr11 | 75349450 | 75349550 | 1274-Lng-A-T | 133 | chr11:75349450-75349550 |
| chr11 | 75367550 | 75367650 | 1072-Lng-A-T | 219 | chr11:75367550-75367650 |
| chr11 | 75377350 | 75377450 | 901-Lng-C-T  | 36  | chr11:75377350-75377450 |
| chr11 | 75437750 | 75437850 | 1223-Lng-D-T | 51  | chr11:75437750-75437850 |
| chr11 | 75450950 | 75451050 | 1152-Lng-A-T | 122 | chr11:75450950-75451050 |
| chr11 | 75497950 | 75498050 | 1152-Lng-A-T | 47  | chr11:75497950-75498050 |
| chr11 | 75521450 | 75521550 | 1274-Lng-A-T | 58  | chr11:75521450-75521550 |
| chr11 | 75538050 | 75538150 | 1072-Lng-A-T | 108 | chr11:75538050-75538150 |
| chr11 | 75550150 | 75550250 | 1100-Lng-A-T | 117 | chr11:75550150-75550250 |
| chr11 | 75561050 | 75561150 | 901-Lng-C-T  | 71  | chr11:75561050-75561150 |
| chr11 | 75562150 | 75562250 | 901-Lng-C-T  | 57  | chr11:75562150-75562250 |
| chr11 | 75572150 | 75572250 | 901-Lng-C-T  | 48  | chr11:75572150-75572250 |

**Table S2: SB Insertion regions**

|       |          |          |              |     |                         |
|-------|----------|----------|--------------|-----|-------------------------|
| chr11 | 75736850 | 75736950 | 1100-Lng-A-T | 67  | chr11:75736850-75736950 |
| chr11 | 75741850 | 75741950 | 901-Lng-B-T  | 187 | chr11:75741850-75741950 |
| chr11 | 75898550 | 75898650 | 1167-Lng-A-T | 153 | chr11:75898550-75898650 |
| chr11 | 75978650 | 75978750 | 1090-Lng-A-T | 89  | chr11:75978650-75978750 |
| chr11 | 75985350 | 75985450 | 1072-Lng-A-T | 64  | chr11:75985350-75985450 |
| chr11 | 76032850 | 76032950 | 1100-Lng-A-T | 98  | chr11:76032850-76032950 |
| chr11 | 76055150 | 76055250 | 1100-Lng-A-T | 66  | chr11:76055150-76055250 |
| chr11 | 76276950 | 76277050 | 1100-Lng-A-T | 69  | chr11:76276950-76277050 |
| chr11 | 76625050 | 76625150 | 1065-Lng-A-T | 48  | chr11:76625050-76625150 |
| chr11 | 76640250 | 76640350 | 1090-Lng-A-T | 44  | chr11:76640250-76640350 |
| chr11 | 76786350 | 76786450 | 901-Lng-D-T  | 298 | chr11:76786350-76786450 |
| chr11 | 77001550 | 77001650 | 846-Lng-A-T  | 55  | chr11:77001550-77001650 |
| chr11 | 77296150 | 77296250 | 1188-Lng-A-T | 34  | chr11:77296150-77296250 |
| chr11 | 77306150 | 77306250 | 1274-Lng-A-T | 120 | chr11:77306150-77306250 |
| chr11 | 77378750 | 77378850 | 1004-Lng-A-T | 177 | chr11:77378750-77378850 |
| chr11 | 77527150 | 77527250 | 1072-Lng-A-T | 73  | chr11:77527150-77527250 |
| chr11 | 77595750 | 77595850 | 1072-Lng-A-T | 97  | chr11:77595750-77595850 |
| chr11 | 77618050 | 77618150 | 901-Lng-C-T  | 367 | chr11:77618050-77618150 |
| chr11 | 77684250 | 77684350 | 1065-Lng-A-T | 52  | chr11:77684250-77684350 |
| chr11 | 77812350 | 77812450 | 901-Lng-C-T  | 66  | chr11:77812350-77812450 |
| chr11 | 77911050 | 77911150 | 1223-Lng-A-T | 235 | chr11:77911050-77911150 |
| chr11 | 77911050 | 77911150 | 1065-Lng-C-T | 63  | chr11:77911050-77911150 |
| chr11 | 77938250 | 77938350 | 1151-Lng-A-T | 97  | chr11:77938250-77938350 |
| chr11 | 78018450 | 78018550 | 1151-Lng-A-T | 84  | chr11:78018450-78018550 |
| chr11 | 78089050 | 78089150 | 1100-Lng-A-T | 251 | chr11:78089050-78089150 |
| chr11 | 78103150 | 78103250 | 1152-Lng-A-T | 78  | chr11:78103150-78103250 |
| chr11 | 78173350 | 78173450 | 1188-Lng-A-T | 43  | chr11:78173350-78173450 |
| chr11 | 78275650 | 78275750 | 1065-Lng-B-T | 57  | chr11:78275650-78275750 |
| chr11 | 78414250 | 78414350 | 1223-Lng-C-T | 48  | chr11:78414250-78414350 |
| chr11 | 78487650 | 78487750 | 1065-Lng-B-T | 83  | chr11:78487650-78487750 |
| chr11 | 78487750 | 78487850 | 1223-Lng-A-T | 99  | chr11:78487750-78487850 |
| chr11 | 78935750 | 78935850 | 1004-Lng-A-T | 180 | chr11:78935750-78935850 |
| chr11 | 79102150 | 79102250 | 1100-Lng-A-T | 95  | chr11:79102150-79102250 |
| chr11 | 79106550 | 79106650 | 1065-Lng-C-T | 147 | chr11:79106550-79106650 |
| chr11 | 79203050 | 79203150 | 1065-Lng-A-T | 49  | chr11:79203050-79203150 |
| chr11 | 79219950 | 79220050 | 1151-Lng-A-T | 244 | chr11:79219950-79220050 |
| chr11 | 79226750 | 79226850 | 1167-Lng-A-T | 64  | chr11:79226750-79226850 |
| chr11 | 79234950 | 79235050 | 1167-Lng-A-T | 91  | chr11:79234950-79235050 |
| chr11 | 79236650 | 79236750 | 1151-Lng-A-T | 233 | chr11:79236650-79236750 |
| chr11 | 79249150 | 79249250 | 1188-Lng-A-T | 322 | chr11:79249150-79249250 |
| chr11 | 79259550 | 79259650 | 1065-Lng-B-T | 102 | chr11:79259550-79259650 |
| chr11 | 79263950 | 79264050 | 1188-Lng-A-T | 42  | chr11:79263950-79264050 |
| chr11 | 79293450 | 79293550 | 1090-Lng-A-T | 70  | chr11:79293450-79293550 |
| chr11 | 79469950 | 79470050 | 1152-Lng-A-T | 54  | chr11:79469950-79470050 |
| chr11 | 79624950 | 79625050 | 1065-Lng-B-T | 54  | chr11:79624950-79625050 |
| chr11 | 79797350 | 79797450 | 1100-Lng-A-T | 109 | chr11:79797350-79797450 |

**Table S2: SB Insertion regions**

|       |          |          |              |     |                         |
|-------|----------|----------|--------------|-----|-------------------------|
| chr11 | 79807850 | 79807950 | 1065-Lng-A-T | 37  | chr11:79807850-79807950 |
| chr11 | 79811450 | 79811550 | 901-Lng-C-T  | 110 | chr11:79811450-79811550 |
| chr11 | 79891650 | 79891750 | 1100-Lng-A-T | 154 | chr11:79891650-79891750 |
| chr11 | 80035250 | 80035350 | 1167-Lng-A-T | 192 | chr11:80035250-80035350 |
| chr11 | 80038450 | 80038550 | 1004-Lng-A-T | 95  | chr11:80038450-80038550 |
| chr11 | 80060550 | 80060650 | 901-Lng-C-T  | 56  | chr11:80060550-80060650 |
| chr11 | 80149750 | 80149850 | 1065-Lng-B-T | 432 | chr11:80149750-80149850 |
| chr11 | 80200850 | 80200950 | 1072-Lng-A-T | 115 | chr11:80200850-80200950 |
| chr11 | 80210650 | 80210750 | 1100-Lng-A-T | 110 | chr11:80210650-80210750 |
| chr11 | 80254050 | 80254150 | 1188-Lng-A-T | 193 | chr11:80254050-80254150 |
| chr11 | 80270850 | 80270950 | 1065-Lng-B-T | 47  | chr11:80270850-80270950 |
| chr11 | 80283150 | 80283250 | 1167-Lng-A-T | 49  | chr11:80283150-80283250 |
| chr11 | 80326750 | 80326850 | 1004-Lng-A-T | 87  | chr11:80326750-80326850 |
| chr11 | 80334350 | 80334450 | 1274-Lng-A-T | 55  | chr11:80334350-80334450 |
| chr11 | 80339450 | 80339550 | 1223-Lng-B-T | 217 | chr11:80339450-80339550 |
| chr11 | 80359350 | 80359450 | 1167-Lng-A-T | 77  | chr11:80359350-80359450 |
| chr11 | 80363450 | 80363550 | 1004-Lng-A-T | 57  | chr11:80363450-80363550 |
| chr11 | 80376550 | 80376650 | 1065-Lng-B-T | 129 | chr11:80376550-80376650 |
| chr11 | 80390050 | 80390150 | 1100-Lng-A-T | 53  | chr11:80390050-80390150 |
| chr11 | 80417850 | 80417950 | 1223-Lng-A-T | 163 | chr11:80417850-80417950 |
| chr11 | 80434450 | 80434550 | 901-Lng-A-T  | 120 | chr11:80434450-80434550 |
| chr11 | 80468450 | 80468550 | 901-Lng-A-T  | 253 | chr11:80468450-80468550 |
| chr11 | 80510550 | 80510650 | 1152-Lng-A-T | 112 | chr11:80510550-80510650 |
| chr11 | 80609950 | 80610050 | 1223-Lng-D-T | 43  | chr11:80609950-80610050 |
| chr11 | 80618250 | 80618350 | 1223-Lng-C-T | 50  | chr11:80618250-80618350 |
| chr11 | 80632850 | 80632950 | 1065-Lng-A-T | 69  | chr11:80632850-80632950 |
| chr11 | 80930150 | 80930250 | 901-Lng-C-T  | 78  | chr11:80930150-80930250 |
| chr11 | 81548750 | 81548850 | 1065-Lng-B-T | 44  | chr11:81548750-81548850 |
| chr11 | 82019850 | 82019950 | 1100-Lng-A-T | 57  | chr11:82019850-82019950 |
| chr11 | 82618350 | 82618450 | 1188-Lng-A-T | 75  | chr11:82618350-82618450 |
| chr11 | 82677550 | 82677650 | 1274-Lng-A-T | 112 | chr11:82677550-82677650 |
| chr11 | 82849750 | 82849850 | 901-Lng-A-T  | 137 | chr11:82849750-82849850 |
| chr11 | 82855250 | 82855350 | 901-Lng-A-T  | 83  | chr11:82855250-82855350 |
| chr11 | 82937750 | 82937850 | 901-Lng-B-T  | 270 | chr11:82937750-82937850 |
| chr11 | 83096750 | 83096850 | 1274-Lng-A-T | 72  | chr11:83096750-83096850 |
| chr11 | 83122350 | 83122450 | 1223-Lng-B-T | 147 | chr11:83122350-83122450 |
| chr11 | 83187050 | 83187150 | 1152-Lng-A-T | 133 | chr11:83187050-83187150 |
| chr11 | 83230650 | 83230750 | 901-Lng-D-T  | 290 | chr11:83230650-83230750 |
| chr11 | 83298750 | 83298850 | 1188-Lng-A-T | 50  | chr11:83298750-83298850 |
| chr11 | 83320950 | 83321050 | 1188-Lng-A-T | 85  | chr11:83320950-83321050 |
| chr11 | 83773850 | 83773950 | 1100-Lng-B-T | 180 | chr11:83773850-83773950 |
| chr11 | 83820950 | 83821050 | 1188-Lng-A-T | 304 | chr11:83820950-83821050 |
| chr11 | 83934950 | 83935050 | 1100-Lng-A-T | 85  | chr11:83934950-83935050 |
| chr11 | 84030550 | 84030650 | 901-Lng-A-T  | 108 | chr11:84030550-84030650 |
| chr11 | 84139450 | 84139550 | 1167-Lng-A-T | 104 | chr11:84139450-84139550 |
| chr11 | 84177950 | 84178050 | 1188-Lng-A-T | 141 | chr11:84177950-84178050 |

**Table S2: SB Insertion regions**

|       |          |          |              |     |                         |
|-------|----------|----------|--------------|-----|-------------------------|
| chr11 | 84318450 | 84318550 | 1065-Lng-A-T | 59  | chr11:84318450-84318550 |
| chr11 | 84365650 | 84365750 | 901-Lng-C-T  | 40  | chr11:84365650-84365750 |
| chr11 | 84653950 | 84654050 | 1274-Lng-A-T | 58  | chr11:84653950-84654050 |
| chr11 | 84656550 | 84656650 | 1167-Lng-A-T | 97  | chr11:84656550-84656650 |
| chr11 | 84676350 | 84676450 | 1004-Lng-A-T | 100 | chr11:84676350-84676450 |
| chr11 | 84677350 | 84677450 | 1065-Lng-B-T | 45  | chr11:84677350-84677450 |
| chr11 | 84677850 | 84677950 | 1152-Lng-A-T | 125 | chr11:84677850-84677950 |
| chr11 | 84681350 | 84681450 | 1223-Lng-D-T | 48  | chr11:84681350-84681450 |
| chr11 | 84899850 | 84899950 | 1223-Lng-C-T | 50  | chr11:84899850-84899950 |
| chr11 | 84937350 | 84937450 | 1065-Lng-B-T | 58  | chr11:84937350-84937450 |
| chr11 | 84941850 | 84941950 | 1274-Lng-A-T | 123 | chr11:84941850-84941950 |
| chr11 | 84958750 | 84958850 | 1100-Lng-A-T | 59  | chr11:84958750-84958850 |
| chr11 | 84999350 | 84999450 | 1065-Lng-A-T | 108 | chr11:84999350-84999450 |
| chr11 | 85022850 | 85022950 | 1152-Lng-A-T | 50  | chr11:85022850-85022950 |
| chr11 | 85023450 | 85023550 | 1274-Lng-A-T | 69  | chr11:85023450-85023550 |
| chr11 | 85327450 | 85327550 | 901-Lng-A-T  | 50  | chr11:85327450-85327550 |
| chr11 | 85461350 | 85461450 | 1152-Lng-A-T | 192 | chr11:85461350-85461450 |
| chr11 | 85495850 | 85495950 | 1223-Lng-B-T | 37  | chr11:85495850-85495950 |
| chr11 | 85609850 | 85609950 | 1223-Lng-C-T | 270 | chr11:85609850-85609950 |
| chr11 | 85749250 | 85749350 | 1065-Lng-A-T | 48  | chr11:85749250-85749350 |
| chr11 | 85845750 | 85845850 | 1152-Lng-A-T | 53  | chr11:85845750-85845850 |
| chr11 | 85889950 | 85890050 | 1065-Lng-A-T | 71  | chr11:85889950-85890050 |
| chr11 | 85921150 | 85921250 | 901-Lng-A-T  | 419 | chr11:85921150-85921250 |
| chr11 | 85957250 | 85957350 | 901-Lng-A-T  | 72  | chr11:85957250-85957350 |
| chr11 | 86083950 | 86084050 | 1152-Lng-A-T | 73  | chr11:86083950-86084050 |
| chr11 | 86086050 | 86086150 | 1004-Lng-A-T | 66  | chr11:86086050-86086150 |
| chr11 | 86090550 | 86090650 | 1004-Lng-A-T | 76  | chr11:86090550-86090650 |
| chr11 | 86098750 | 86098850 | 901-Lng-A-T  | 96  | chr11:86098750-86098850 |
| chr11 | 86109750 | 86109850 | 1152-Lng-A-T | 73  | chr11:86109750-86109850 |
| chr11 | 86111250 | 86111350 | 901-Lng-D-T  | 402 | chr11:86111250-86111350 |
| chr11 | 86125550 | 86125650 | 1223-Lng-D-T | 44  | chr11:86125550-86125650 |
| chr11 | 86164650 | 86164750 | 1072-Lng-A-T | 142 | chr11:86164650-86164750 |
| chr11 | 86166150 | 86166250 | 1188-Lng-A-T | 35  | chr11:86166150-86166250 |
| chr11 | 86317850 | 86317950 | 1223-Lng-D-T | 46  | chr11:86317850-86317950 |
| chr11 | 86409650 | 86409750 | 1167-Lng-A-T | 55  | chr11:86409650-86409750 |
| chr11 | 86462650 | 86462750 | 1065-Lng-A-T | 57  | chr11:86462650-86462750 |
| chr11 | 86480050 | 86480150 | 1223-Lng-B-T | 37  | chr11:86480050-86480150 |
| chr11 | 86541950 | 86542050 | 1152-Lng-A-T | 81  | chr11:86541950-86542050 |
| chr11 | 86552750 | 86552850 | 901-Lng-C-T  | 71  | chr11:86552750-86552850 |
| chr11 | 86558550 | 86558650 | 1188-Lng-A-T | 147 | chr11:86558550-86558650 |
| chr11 | 86648750 | 86648850 | 1223-Lng-D-T | 44  | chr11:86648750-86648850 |
| chr11 | 86687750 | 86687850 | 1152-Lng-A-T | 56  | chr11:86687750-86687850 |
| chr11 | 86751150 | 86751250 | 1274-Lng-A-T | 49  | chr11:86751150-86751250 |
| chr11 | 86754950 | 86755050 | 1274-Lng-A-T | 331 | chr11:86754950-86755050 |
| chr11 | 86772350 | 86772450 | 1274-Lng-A-T | 856 | chr11:86772350-86772450 |
| chr11 | 86797750 | 86797850 | 1188-Lng-A-T | 40  | chr11:86797750-86797850 |



**Table S2: SB Insertion regions**

|       |          |          |              |     |                         |
|-------|----------|----------|--------------|-----|-------------------------|
| chr11 | 86845350 | 86845450 | 1100-Lng-A-T | 123 | chr11:86845350-86845450 |
| chr11 | 86877650 | 86877750 | 1072-Lng-A-T | 143 | chr11:86877650-86877750 |
| chr11 | 86881650 | 86881750 | 901-Lng-C-T  | 45  | chr11:86881650-86881750 |
| chr11 | 87229450 | 87229550 | 1274-Lng-A-T | 60  | chr11:87229450-87229550 |
| chr11 | 87431350 | 87431450 | 1100-Lng-A-T | 54  | chr11:87431350-87431450 |
| chr11 | 87864750 | 87864850 | 1167-Lng-A-T | 110 | chr11:87864750-87864850 |
| chr11 | 88127850 | 88127950 | 1100-Lng-A-T | 52  | chr11:88127850-88127950 |
| chr11 | 88190150 | 88190250 | 1274-Lng-A-T | 62  | chr11:88190150-88190250 |
| chr11 | 88235650 | 88235750 | 1274-Lng-A-T | 49  | chr11:88235650-88235750 |
| chr11 | 88253650 | 88253750 | 1223-Lng-D-T | 58  | chr11:88253650-88253750 |
| chr11 | 88288850 | 88288950 | 901-Lng-A-T  | 75  | chr11:88288850-88288950 |
| chr11 | 88308850 | 88308950 | 1274-Lng-A-T | 85  | chr11:88308850-88308950 |
| chr11 | 88323750 | 88323850 | 1223-Lng-C-T | 52  | chr11:88323750-88323850 |
| chr11 | 88327250 | 88327350 | 1223-Lng-D-T | 41  | chr11:88327250-88327350 |
| chr11 | 88408350 | 88408450 | 1152-Lng-A-T | 66  | chr11:88408350-88408450 |
| chr11 | 88505350 | 88505450 | 1167-Lng-A-T | 140 | chr11:88505350-88505450 |
| chr11 | 88576250 | 88576350 | 1065-Lng-B-T | 54  | chr11:88576250-88576350 |
| chr11 | 88583650 | 88583750 | 1223-Lng-C-T | 44  | chr11:88583650-88583750 |
| chr11 | 88724050 | 88724150 | 1223-Lng-C-T | 54  | chr11:88724050-88724150 |
| chr11 | 88762650 | 88762750 | 1004-Lng-A-T | 85  | chr11:88762650-88762750 |
| chr11 | 88901350 | 88901450 | 1274-Lng-A-T | 74  | chr11:88901350-88901450 |
| chr11 | 89099950 | 89100050 | 1065-Lng-A-T | 55  | chr11:89099950-89100050 |
| chr11 | 89400650 | 89400750 | 1167-Lng-A-T | 72  | chr11:89400650-89400750 |
| chr11 | 89609750 | 89609850 | 1065-Lng-B-T | 638 | chr11:89609750-89609850 |
| chr11 | 89880650 | 89880750 | 1065-Lng-B-T | 44  | chr11:89880650-89880750 |
| chr11 | 90051450 | 90051550 | 1100-Lng-A-T | 66  | chr11:90051450-90051550 |
| chr11 | 90113050 | 90113150 | 1274-Lng-A-T | 63  | chr11:90113050-90113150 |
| chr11 | 90141350 | 90141450 | 1004-Lng-A-T | 95  | chr11:90141350-90141450 |
| chr11 | 90461450 | 90461550 | 1223-Lng-D-T | 48  | chr11:90461450-90461550 |
| chr11 | 90496950 | 90497050 | 1072-Lng-A-T | 59  | chr11:90496950-90497050 |
| chr11 | 90774450 | 90774550 | 901-Lng-C-T  | 36  | chr11:90774450-90774550 |
| chr11 | 91060850 | 91060950 | 901-Lng-B-T  | 42  | chr11:91060850-91060950 |
| chr11 | 91194950 | 91195050 | 1072-Lng-A-T | 149 | chr11:91194950-91195050 |
| chr11 | 91281150 | 91281250 | 1065-Lng-B-T | 54  | chr11:91281150-91281250 |
| chr11 | 91425950 | 91426050 | 1072-Lng-A-T | 53  | chr11:91425950-91426050 |
| chr11 | 91585050 | 91585150 | 1065-Lng-C-T | 87  | chr11:91585050-91585150 |
| chr11 | 91689950 | 91690050 | 1274-Lng-A-T | 182 | chr11:91689950-91690050 |
| chr11 | 91838450 | 91838550 | 1090-Lng-A-T | 44  | chr11:91838450-91838550 |
| chr11 | 91905950 | 91906050 | 901-Lng-C-T  | 79  | chr11:91905950-91906050 |
| chr11 | 91929350 | 91929450 | 846-Lng-A-T  | 73  | chr11:91929350-91929450 |
| chr11 | 92064150 | 92064250 | 1065-Lng-A-T | 73  | chr11:92064150-92064250 |
| chr11 | 92098950 | 92099050 | 1223-Lng-B-T | 43  | chr11:92098950-92099050 |
| chr11 | 92166250 | 92166350 | 1152-Lng-A-T | 93  | chr11:92166250-92166350 |
| chr11 | 92336450 | 92336550 | 1004-Lng-A-T | 90  | chr11:92336450-92336550 |
| chr11 | 92666750 | 92666850 | 1223-Lng-B-T | 36  | chr11:92666750-92666850 |
| chr11 | 92687850 | 92687950 | 1090-Lng-A-T | 52  | chr11:92687850-92687950 |

**Table S2: SB Insertion regions**

|       |          |          |              |      |                         |
|-------|----------|----------|--------------|------|-------------------------|
| chr11 | 92866750 | 92866850 | 1152-Lng-A-T | 309  | chr11:92866750-92866850 |
| chr11 | 93099750 | 93099850 | 846-Lng-A-T  | 44   | chr11:93099750-93099850 |
| chr11 | 93219350 | 93219450 | 1274-Lng-A-T | 68   | chr11:93219350-93219450 |
| chr11 | 93791550 | 93791650 | 1072-Lng-A-T | 651  | chr11:93791550-93791650 |
| chr11 | 93872650 | 93872750 | 1100-Lng-A-T | 234  | chr11:93872650-93872750 |
| chr11 | 93888450 | 93888550 | 901-Lng-C-T  | 31   | chr11:93888450-93888550 |
| chr11 | 93897050 | 93897150 | 1065-Lng-C-T | 90   | chr11:93897050-93897150 |
| chr11 | 93900850 | 93900950 | 901-Lng-C-T  | 2143 | chr11:93900850-93900950 |
| chr11 | 93901250 | 93901350 | 901-Lng-C-T  | 66   | chr11:93901250-93901350 |
| chr11 | 93901250 | 93901350 | 1065-Lng-A-T | 169  | chr11:93901250-93901350 |
| chr11 | 93912650 | 93912750 | 901-Lng-C-T  | 99   | chr11:93912650-93912750 |
| chr11 | 93942150 | 93942250 | 1167-Lng-A-T | 95   | chr11:93942150-93942250 |
| chr11 | 93945950 | 93946050 | 1151-Lng-A-T | 57   | chr11:93945950-93946050 |
| chr11 | 94141350 | 94141450 | 901-Lng-B-T  | 146  | chr11:94141350-94141450 |
| chr11 | 94159650 | 94159750 | 1004-Lng-A-T | 50   | chr11:94159650-94159750 |
| chr11 | 94169350 | 94169450 | 1072-Lng-A-T | 64   | chr11:94169350-94169450 |
| chr11 | 94257050 | 94257150 | 901-Lng-D-T  | 54   | chr11:94257050-94257150 |
| chr11 | 94361650 | 94361750 | 901-Lng-B-T  | 38   | chr11:94361650-94361750 |
| chr11 | 94856950 | 94857050 | 901-Lng-C-T  | 40   | chr11:94856950-94857050 |
| chr11 | 95135850 | 95135950 | 901-Lng-C-T  | 69   | chr11:95135850-95135950 |
| chr11 | 95203450 | 95203550 | 846-Lng-A-T  | 131  | chr11:95203450-95203550 |
| chr11 | 95209450 | 95209550 | 1004-Lng-A-T | 3102 | chr11:95209450-95209550 |
| chr11 | 95271650 | 95271750 | 1151-Lng-A-T | 258  | chr11:95271650-95271750 |
| chr11 | 95281350 | 95281450 | 1223-Lng-D-T | 170  | chr11:95281350-95281450 |
| chr11 | 95285050 | 95285150 | 1152-Lng-A-T | 66   | chr11:95285050-95285150 |
| chr11 | 95306450 | 95306550 | 1274-Lng-A-T | 79   | chr11:95306450-95306550 |
| chr11 | 95319550 | 95319650 | 1100-Lng-A-T | 154  | chr11:95319550-95319650 |
| chr11 | 95321850 | 95321950 | 1004-Lng-A-T | 67   | chr11:95321850-95321950 |
| chr11 | 95518450 | 95518550 | 1188-Lng-A-T | 93   | chr11:95518450-95518550 |
| chr11 | 95539750 | 95539850 | 1223-Lng-A-T | 223  | chr11:95539750-95539850 |
| chr11 | 95568750 | 95568850 | 1223-Lng-B-T | 58   | chr11:95568750-95568850 |
| chr11 | 95578050 | 95578150 | 1223-Lng-A-T | 109  | chr11:95578050-95578150 |
| chr11 | 95608050 | 95608150 | 901-Lng-C-T  | 37   | chr11:95608050-95608150 |
| chr11 | 95610550 | 95610650 | 901-Lng-C-T  | 54   | chr11:95610550-95610650 |
| chr11 | 95634950 | 95635050 | 901-Lng-A-T  | 426  | chr11:95634950-95635050 |
| chr11 | 95716750 | 95716850 | 1072-Lng-A-T | 212  | chr11:95716750-95716850 |
| chr11 | 95887750 | 95887850 | 1167-Lng-A-T | 61   | chr11:95887750-95887850 |
| chr11 | 96312550 | 96312650 | 901-Lng-B-T  | 76   | chr11:96312550-96312650 |
| chr11 | 96406050 | 96406150 | 1072-Lng-A-T | 58   | chr11:96406050-96406150 |
| chr11 | 96445750 | 96445850 | 1065-Lng-A-T | 102  | chr11:96445750-96445850 |
| chr11 | 96615750 | 96615850 | 1151-Lng-A-T | 382  | chr11:96615750-96615850 |
| chr11 | 96698350 | 96698450 | 1065-Lng-C-T | 81   | chr11:96698350-96698450 |
| chr11 | 96785250 | 96785350 | 1274-Lng-A-T | 193  | chr11:96785250-96785350 |
| chr11 | 97018950 | 97019050 | 1223-Lng-B-T | 47   | chr11:97018950-97019050 |
| chr11 | 97043150 | 97043250 | 1100-Lng-A-T | 91   | chr11:97043150-97043250 |
| chr11 | 97084050 | 97084150 | 901-Lng-C-T  | 106  | chr11:97084050-97084150 |

**Table S2: SB Insertion regions**

|       |           |           |              |      |                           |
|-------|-----------|-----------|--------------|------|---------------------------|
| chr11 | 97084050  | 97084150  | 1151-Lng-A-T | 129  | chr11:97084050-97084150   |
| chr11 | 97101550  | 97101650  | 1152-Lng-A-T | 45   | chr11:97101550-97101650   |
| chr11 | 97125450  | 97125550  | 1188-Lng-A-T | 45   | chr11:97125450-97125550   |
| chr11 | 97191750  | 97191850  | 1188-Lng-A-T | 36   | chr11:97191750-97191850   |
| chr11 | 97230250  | 97230350  | 1004-Lng-A-T | 70   | chr11:97230250-97230350   |
| chr11 | 97399550  | 97399650  | 1151-Lng-A-T | 54   | chr11:97399550-97399650   |
| chr11 | 97431550  | 97431650  | 901-Lng-D-T  | 218  | chr11:97431550-97431650   |
| chr11 | 97666550  | 97666650  | 1065-Lng-C-T | 909  | chr11:97666550-97666650   |
| chr11 | 97679150  | 97679250  | 1151-Lng-A-T | 111  | chr11:97679150-97679250   |
| chr11 | 97895050  | 97895150  | 1274-Lng-A-T | 427  | chr11:97895050-97895150   |
| chr11 | 97957550  | 97957650  | 1151-Lng-A-T | 285  | chr11:97957550-97957650   |
| chr11 | 98014450  | 98014550  | 1090-Lng-B-T | 272  | chr11:98014450-98014550   |
| chr11 | 98068550  | 98068650  | 901-Lng-A-T  | 146  | chr11:98068550-98068650   |
| chr11 | 98171650  | 98171750  | 1100-Lng-A-T | 67   | chr11:98171650-98171750   |
| chr11 | 98220850  | 98220950  | 1188-Lng-A-T | 198  | chr11:98220850-98220950   |
| chr11 | 98227350  | 98227450  | 1274-Lng-A-T | 224  | chr11:98227350-98227450   |
| chr11 | 98467050  | 98467150  | 1274-Lng-A-T | 52   | chr11:98467050-98467150   |
| chr11 | 98641650  | 98641750  | 1090-Lng-A-T | 60   | chr11:98641650-98641750   |
| chr11 | 98647050  | 98647150  | 1274-Lng-A-T | 409  | chr11:98647050-98647150   |
| chr11 | 98730450  | 98730550  | 1152-Lng-A-T | 84   | chr11:98730450-98730550   |
| chr11 | 98800150  | 98800250  | 1223-Lng-B-T | 87   | chr11:98800150-98800250   |
| chr11 | 99070350  | 99070450  | 1100-Lng-A-T | 76   | chr11:99070350-99070450   |
| chr11 | 99077950  | 99078050  | 1072-Lng-A-T | 132  | chr11:99077950-99078050   |
| chr11 | 99342950  | 99343050  | 846-Lng-A-T  | 117  | chr11:99342950-99343050   |
| chr11 | 99371950  | 99372050  | 1223-Lng-D-T | 42   | chr11:99371950-99372050   |
| chr11 | 99468750  | 99468850  | 1100-Lng-A-T | 98   | chr11:99468750-99468850   |
| chr11 | 99588250  | 99588350  | 901-Lng-B-T  | 83   | chr11:99588250-99588350   |
| chr11 | 99650450  | 99650550  | 1004-Lng-A-T | 65   | chr11:99650450-99650550   |
| chr11 | 100229050 | 100229150 | 1167-Lng-A-T | 70   | chr11:100229050-100229150 |
| chr11 | 100329650 | 100329750 | 1090-Lng-A-T | 60   | chr11:100329650-100329750 |
| chr11 | 100387950 | 100388050 | 901-Lng-D-T  | 180  | chr11:100387950-100388050 |
| chr11 | 100399250 | 100399350 | 1223-Lng-C-T | 43   | chr11:100399250-100399350 |
| chr11 | 100404150 | 100404250 | 1100-Lng-A-T | 51   | chr11:100404150-100404250 |
| chr11 | 100423150 | 100423250 | 901-Lng-A-T  | 227  | chr11:100423150-100423250 |
| chr11 | 100685050 | 100685150 | 1152-Lng-A-T | 32   | chr11:100685050-100685150 |
| chr11 | 100969250 | 100969350 | 901-Lng-B-T  | 83   | chr11:100969250-100969350 |
| chr11 | 100976750 | 100976850 | 846-Lng-A-T  | 62   | chr11:100976750-100976850 |
| chr11 | 101291950 | 101292050 | 1274-Lng-A-T | 66   | chr11:101291950-101292050 |
| chr11 | 101504250 | 101504350 | 1090-Lng-A-T | 79   | chr11:101504250-101504350 |
| chr11 | 101509050 | 101509150 | 846-Lng-A-T  | 175  | chr11:101509050-101509150 |
| chr11 | 101573650 | 101573750 | 1188-Lng-A-T | 44   | chr11:101573650-101573750 |
| chr11 | 101748250 | 101748350 | 1223-Lng-D-T | 99   | chr11:101748250-101748350 |
| chr11 | 102029750 | 102029850 | 1223-Lng-B-T | 38   | chr11:102029750-102029850 |
| chr11 | 102193750 | 102193850 | 1072-Lng-A-T | 191  | chr11:102193750-102193850 |
| chr11 | 102238350 | 102238450 | 1065-Lng-A-T | 40   | chr11:102238350-102238450 |
| chr11 | 102285650 | 102285750 | 1223-Lng-A-T | 1582 | chr11:102285650-102285750 |

**Table S2: SB Insertion regions**

|       |           |           |              |     |                           |
|-------|-----------|-----------|--------------|-----|---------------------------|
| chr11 | 102292650 | 102292750 | 1223-Lng-D-T | 230 | chr11:102292650-102292750 |
| chr11 | 102350150 | 102350250 | 1072-Lng-A-T | 56  | chr11:102350150-102350250 |
| chr11 | 102358850 | 102358950 | 1004-Lng-A-T | 62  | chr11:102358850-102358950 |
| chr11 | 102377550 | 102377650 | 1274-Lng-A-T | 211 | chr11:102377550-102377650 |
| chr11 | 102741150 | 102741250 | 1151-Lng-A-T | 55  | chr11:102741150-102741250 |
| chr11 | 102838850 | 102838950 | 1274-Lng-A-T | 128 | chr11:102838850-102838950 |
| chr11 | 102871650 | 102871750 | 901-Lng-C-T  | 230 | chr11:102871650-102871750 |
| chr11 | 102886650 | 102886750 | 1090-Lng-A-T | 56  | chr11:102886650-102886750 |
| chr11 | 102983750 | 102983850 | 1100-Lng-A-T | 154 | chr11:102983750-102983850 |
| chr11 | 102987250 | 102987350 | 1223-Lng-C-T | 48  | chr11:102987250-102987350 |
| chr11 | 103197950 | 103198050 | 1274-Lng-A-T | 73  | chr11:103197950-103198050 |
| chr11 | 103551850 | 103551950 | 1152-Lng-A-T | 32  | chr11:103551850-103551950 |
| chr11 | 104219550 | 104219650 | 1167-Lng-A-T | 100 | chr11:104219550-104219650 |
| chr11 | 104228450 | 104228550 | 1274-Lng-A-T | 93  | chr11:104228450-104228550 |
| chr11 | 104256150 | 104256250 | 901-Lng-C-T  | 50  | chr11:104256150-104256250 |
| chr11 | 104257550 | 104257650 | 1090-Lng-A-T | 52  | chr11:104257550-104257650 |
| chr11 | 104260250 | 104260350 | 1223-Lng-B-T | 151 | chr11:104260250-104260350 |
| chr11 | 104280850 | 104280950 | 1065-Lng-B-T | 266 | chr11:104280850-104280950 |
| chr11 | 104309450 | 104309550 | 1100-Lng-A-T | 84  | chr11:104309450-104309550 |
| chr11 | 104328750 | 104328850 | 1152-Lng-A-T | 212 | chr11:104328750-104328850 |
| chr11 | 104380150 | 104380250 | 1090-Lng-A-T | 57  | chr11:104380150-104380250 |
| chr11 | 104532550 | 104532650 | 1167-Lng-A-T | 134 | chr11:104532550-104532650 |
| chr11 | 105038250 | 105038350 | 1065-Lng-B-T | 84  | chr11:105038250-105038350 |
| chr11 | 105039850 | 105039950 | 901-Lng-A-T  | 57  | chr11:105039850-105039950 |
| chr11 | 105082850 | 105082950 | 1167-Lng-A-T | 56  | chr11:105082850-105082950 |
| chr11 | 105117950 | 105118050 | 1004-Lng-A-T | 67  | chr11:105117950-105118050 |
| chr11 | 105140950 | 105141050 | 1152-Lng-A-T | 65  | chr11:105140950-105141050 |
| chr11 | 105186450 | 105186550 | 1274-Lng-A-T | 85  | chr11:105186450-105186550 |
| chr11 | 105275350 | 105275450 | 1223-Lng-D-T | 64  | chr11:105275350-105275450 |
| chr11 | 105330350 | 105330450 | 1188-Lng-A-T | 42  | chr11:105330350-105330450 |
| chr11 | 105345150 | 105345250 | 1100-Lng-A-T | 125 | chr11:105345150-105345250 |
| chr11 | 105365550 | 105365650 | 1223-Lng-B-T | 47  | chr11:105365550-105365650 |
| chr11 | 105458350 | 105458450 | 1004-Lng-A-T | 66  | chr11:105458350-105458450 |
| chr11 | 105477450 | 105477550 | 1065-Lng-C-T | 99  | chr11:105477450-105477550 |
| chr11 | 105481250 | 105481350 | 1223-Lng-D-T | 44  | chr11:105481250-105481350 |
| chr11 | 105513850 | 105513950 | 1223-Lng-C-T | 58  | chr11:105513850-105513950 |
| chr11 | 105515450 | 105515550 | 1100-Lng-A-T | 55  | chr11:105515450-105515550 |
| chr11 | 105615950 | 105616050 | 1223-Lng-A-T | 121 | chr11:105615950-105616050 |
| chr11 | 105623450 | 105623550 | 1072-Lng-A-T | 62  | chr11:105623450-105623550 |
| chr11 | 105690750 | 105690850 | 1167-Lng-A-T | 126 | chr11:105690750-105690850 |
| chr11 | 105705050 | 105705150 | 1223-Lng-C-T | 43  | chr11:105705050-105705150 |
| chr11 | 105725450 | 105725550 | 1223-Lng-B-T | 173 | chr11:105725450-105725550 |
| chr11 | 105787650 | 105787750 | 1072-Lng-A-T | 174 | chr11:105787650-105787750 |
| chr11 | 105820150 | 105820250 | 901-Lng-A-T  | 55  | chr11:105820150-105820250 |
| chr11 | 105906250 | 105906350 | 1065-Lng-B-T | 70  | chr11:105906250-105906350 |
| chr11 | 105968450 | 105968550 | 901-Lng-A-T  | 63  | chr11:105968450-105968550 |

**Table S2: SB Insertion regions**

|       |           |           |              |      |                           |
|-------|-----------|-----------|--------------|------|---------------------------|
| chr11 | 105977450 | 105977550 | 901-Lng-B-T  | 43   | chr11:105977450-105977550 |
| chr11 | 106010350 | 106010450 | 846-Lng-A-T  | 46   | chr11:106010350-106010450 |
| chr11 | 106061350 | 106061450 | 1152-Lng-A-T | 43   | chr11:106061350-106061450 |
| chr11 | 106279150 | 106279250 | 1223-Lng-C-T | 45   | chr11:106279150-106279250 |
| chr11 | 106301350 | 106301450 | 1152-Lng-A-T | 168  | chr11:106301350-106301450 |
| chr11 | 106346350 | 106346450 | 1188-Lng-A-T | 79   | chr11:106346350-106346450 |
| chr11 | 106471950 | 106472050 | 1274-Lng-A-T | 101  | chr11:106471950-106472050 |
| chr11 | 106664350 | 106664450 | 1188-Lng-A-T | 277  | chr11:106664350-106664450 |
| chr11 | 106665550 | 106665650 | 1274-Lng-A-T | 69   | chr11:106665550-106665650 |
| chr11 | 106666450 | 106666550 | 1152-Lng-A-T | 84   | chr11:106666450-106666550 |
| chr11 | 106687250 | 106687350 | 1090-Lng-A-T | 55   | chr11:106687250-106687350 |
| chr11 | 106723850 | 106723950 | 1100-Lng-A-T | 95   | chr11:106723850-106723950 |
| chr11 | 106726550 | 106726650 | 1152-Lng-A-T | 36   | chr11:106726550-106726650 |
| chr11 | 106728050 | 106728150 | 1152-Lng-A-T | 82   | chr11:106728050-106728150 |
| chr11 | 106763950 | 106764050 | 1100-Lng-B-T | 62   | chr11:106763950-106764050 |
| chr11 | 106942950 | 106943050 | 1151-Lng-A-T | 6064 | chr11:106942950-106943050 |
| chr11 | 106995050 | 106995150 | 1274-Lng-A-T | 167  | chr11:106995050-106995150 |
| chr11 | 107011150 | 107011250 | 1065-Lng-B-T | 84   | chr11:107011150-107011250 |
| chr11 | 107047150 | 107047250 | 1090-Lng-A-T | 45   | chr11:107047150-107047250 |
| chr11 | 107244850 | 107244950 | 1151-Lng-A-T | 60   | chr11:107244850-107244950 |
| chr11 | 107266050 | 107266150 | 1065-Lng-A-T | 59   | chr11:107266050-107266150 |
| chr11 | 107456750 | 107456850 | 1152-Lng-A-T | 71   | chr11:107456750-107456850 |
| chr11 | 107477950 | 107478050 | 1188-Lng-A-T | 40   | chr11:107477950-107478050 |
| chr11 | 107480150 | 107480250 | 1188-Lng-A-T | 35   | chr11:107480150-107480250 |
| chr11 | 107508350 | 107508450 | 901-Lng-D-T  | 192  | chr11:107508350-107508450 |
| chr11 | 107520950 | 107521050 | 1100-Lng-B-T | 51   | chr11:107520950-107521050 |
| chr11 | 107978250 | 107978350 | 1072-Lng-A-T | 53   | chr11:107978250-107978350 |
| chr11 | 108131350 | 108131450 | 1274-Lng-A-T | 53   | chr11:108131350-108131450 |
| chr11 | 108165750 | 108165850 | 1004-Lng-A-T | 52   | chr11:108165750-108165850 |
| chr11 | 108184350 | 108184450 | 901-Lng-C-T  | 75   | chr11:108184350-108184450 |
| chr11 | 108197150 | 108197250 | 1100-Lng-A-T | 105  | chr11:108197150-108197250 |
| chr11 | 108454050 | 108454150 | 846-Lng-A-T  | 209  | chr11:108454050-108454150 |
| chr11 | 108612150 | 108612250 | 1152-Lng-A-T | 49   | chr11:108612150-108612250 |
| chr11 | 108795150 | 108795250 | 1065-Lng-B-T | 48   | chr11:108795150-108795250 |
| chr11 | 109082650 | 109082750 | 1151-Lng-A-T | 76   | chr11:109082650-109082750 |
| chr11 | 109227550 | 109227650 | 901-Lng-A-T  | 121  | chr11:109227550-109227650 |
| chr11 | 109236650 | 109236750 | 1151-Lng-A-T | 58   | chr11:109236650-109236750 |
| chr11 | 109267950 | 109268050 | 1090-Lng-A-T | 56   | chr11:109267950-109268050 |
| chr11 | 109304650 | 109304750 | 1188-Lng-A-T | 361  | chr11:109304650-109304750 |
| chr11 | 109390150 | 109390250 | 1151-Lng-A-T | 2149 | chr11:109390150-109390250 |
| chr11 | 109407450 | 109407550 | 1274-Lng-A-T | 63   | chr11:109407450-109407550 |
| chr11 | 109423050 | 109423150 | 1065-Lng-A-T | 50   | chr11:109423050-109423150 |
| chr11 | 109525050 | 109525150 | 1167-Lng-A-T | 84   | chr11:109525050-109525150 |
| chr11 | 109528550 | 109528650 | 1100-Lng-A-T | 51   | chr11:109528550-109528650 |
| chr11 | 109561950 | 109562050 | 901-Lng-C-T  | 193  | chr11:109561950-109562050 |
| chr11 | 109713250 | 109713350 | 1004-Lng-A-T | 308  | chr11:109713250-109713350 |

**Table S2: SB Insertion regions**

|       |           |           |              |     |                           |
|-------|-----------|-----------|--------------|-----|---------------------------|
| chr11 | 109740150 | 109740250 | 1223-Lng-D-T | 42  | chr11:109740150-109740250 |
| chr11 | 109984550 | 109984650 | 901-Lng-A-T  | 143 | chr11:109984550-109984650 |
| chr11 | 110116650 | 110116750 | 901-Lng-A-T  | 532 | chr11:110116650-110116750 |
| chr11 | 110409550 | 110409650 | 1004-Lng-A-T | 73  | chr11:110409550-110409650 |
| chr11 | 110415550 | 110415650 | 1065-Lng-A-T | 52  | chr11:110415550-110415650 |
| chr11 | 110548750 | 110548850 | 1223-Lng-B-T | 46  | chr11:110548750-110548850 |
| chr11 | 110943150 | 110943250 | 1065-Lng-C-T | 124 | chr11:110943150-110943250 |
| chr11 | 111095950 | 111096050 | 846-Lng-A-T  | 47  | chr11:111095950-111096050 |
| chr11 | 111110950 | 111111050 | 901-Lng-C-T  | 82  | chr11:111110950-111111050 |
| chr11 | 111546150 | 111546250 | 1065-Lng-A-T | 95  | chr11:111546150-111546250 |
| chr11 | 111586950 | 111587050 | 901-Lng-B-T  | 211 | chr11:111586950-111587050 |
| chr11 | 111620450 | 111620550 | 1065-Lng-A-T | 36  | chr11:111620450-111620550 |
| chr11 | 111789850 | 111789950 | 1065-Lng-C-T | 116 | chr11:111789850-111789950 |
| chr11 | 112164950 | 112165050 | 901-Lng-B-T  | 122 | chr11:112164950-112165050 |
| chr11 | 112366650 | 112366750 | 901-Lng-A-T  | 90  | chr11:112366650-112366750 |
| chr11 | 112713250 | 112713350 | 1152-Lng-A-T | 64  | chr11:112713250-112713350 |
| chr11 | 112806950 | 112807050 | 1065-Lng-B-T | 60  | chr11:112806950-112807050 |
| chr11 | 113266150 | 113266250 | 1151-Lng-A-T | 277 | chr11:113266150-113266250 |
| chr11 | 113363050 | 113363150 | 1072-Lng-A-T | 142 | chr11:113363050-113363150 |
| chr11 | 113496050 | 113496150 | 901-Lng-C-T  | 46  | chr11:113496050-113496150 |
| chr11 | 113542250 | 113542350 | 1223-Lng-B-T | 60  | chr11:113542250-113542350 |
| chr11 | 113548750 | 113548850 | 1223-Lng-A-T | 184 | chr11:113548750-113548850 |
| chr11 | 114639550 | 114639650 | 1274-Lng-A-T | 136 | chr11:114639550-114639650 |
| chr11 | 114702750 | 114702850 | 1167-Lng-A-T | 140 | chr11:114702750-114702850 |
| chr11 | 114716250 | 114716350 | 1274-Lng-A-T | 193 | chr11:114716250-114716350 |
| chr11 | 114852450 | 114852550 | 1065-Lng-C-T | 83  | chr11:114852450-114852550 |
| chr11 | 115084650 | 115084750 | 1090-Lng-A-T | 66  | chr11:115084650-115084750 |
| chr11 | 115137050 | 115137150 | 1065-Lng-A-T | 40  | chr11:115137050-115137150 |
| chr11 | 115147150 | 115147250 | 1090-Lng-A-T | 54  | chr11:115147150-115147250 |
| chr11 | 115533450 | 115533550 | 1004-Lng-A-T | 49  | chr11:115533450-115533550 |
| chr11 | 115559950 | 115560050 | 1188-Lng-A-T | 34  | chr11:115559950-115560050 |
| chr11 | 115583950 | 115584050 | 1065-Lng-A-T | 79  | chr11:115583950-115584050 |
| chr11 | 115905850 | 115905950 | 1151-Lng-A-T | 54  | chr11:115905850-115905950 |
| chr11 | 115905950 | 115906050 | 901-Lng-C-T  | 45  | chr11:115905950-115906050 |
| chr11 | 116032250 | 116032350 | 1100-Lng-A-T | 413 | chr11:116032250-116032350 |
| chr11 | 116075450 | 116075550 | 1274-Lng-A-T | 78  | chr11:116075450-116075550 |
| chr11 | 116119250 | 116119350 | 1090-Lng-A-T | 52  | chr11:116119250-116119350 |
| chr11 | 116365050 | 116365150 | 1274-Lng-A-T | 79  | chr11:116365050-116365150 |
| chr11 | 116379350 | 116379450 | 1274-Lng-A-T | 50  | chr11:116379350-116379450 |
| chr11 | 116538950 | 116539050 | 1223-Lng-A-T | 152 | chr11:116538950-116539050 |
| chr11 | 117011250 | 117011350 | 1065-Lng-A-T | 38  | chr11:117011250-117011350 |
| chr11 | 117185450 | 117185550 | 1274-Lng-A-T | 226 | chr11:117185450-117185550 |
| chr11 | 117269650 | 117269750 | 1090-Lng-B-T | 143 | chr11:117269650-117269750 |
| chr11 | 117404250 | 117404350 | 1100-Lng-A-T | 186 | chr11:117404250-117404350 |
| chr11 | 117576950 | 117577050 | 1090-Lng-A-T | 222 | chr11:117576950-117577050 |
| chr11 | 117607750 | 117607850 | 901-Lng-C-T  | 195 | chr11:117607750-117607850 |

**Table S2: SB Insertion regions**

|       |           |           |              |      |                           |
|-------|-----------|-----------|--------------|------|---------------------------|
| chr11 | 117885150 | 117885250 | 1065-Lng-B-T | 59   | chr11:117885150-117885250 |
| chr11 | 118044650 | 118044750 | 1151-Lng-A-T | 74   | chr11:118044650-118044750 |
| chr11 | 118060150 | 118060250 | 846-Lng-A-T  | 78   | chr11:118060150-118060250 |
| chr11 | 118203250 | 118203350 | 1065-Lng-B-T | 60   | chr11:118203250-118203350 |
| chr11 | 118526150 | 118526250 | 901-Lng-D-T  | 237  | chr11:118526150-118526250 |
| chr11 | 119185550 | 119185650 | 1152-Lng-A-T | 69   | chr11:119185550-119185650 |
| chr11 | 119567150 | 119567250 | 1274-Lng-A-T | 68   | chr11:119567150-119567250 |
| chr11 | 119602250 | 119602350 | 1188-Lng-A-T | 41   | chr11:119602250-119602350 |
| chr11 | 119626250 | 119626350 | 1100-Lng-A-T | 56   | chr11:119626250-119626350 |
| chr11 | 119651450 | 119651550 | 1274-Lng-A-T | 99   | chr11:119651450-119651550 |
| chr11 | 119657450 | 119657550 | 1065-Lng-C-T | 72   | chr11:119657450-119657550 |
| chr11 | 119703450 | 119703550 | 1188-Lng-A-T | 218  | chr11:119703450-119703550 |
| chr11 | 119714650 | 119714750 | 1065-Lng-A-T | 58   | chr11:119714650-119714750 |
| chr11 | 119835050 | 119835150 | 1152-Lng-A-T | 134  | chr11:119835050-119835150 |
| chr11 | 120005950 | 120006050 | 1188-Lng-A-T | 38   | chr11:120005950-120006050 |
| chr11 | 120140650 | 120140750 | 1152-Lng-A-T | 90   | chr11:120140650-120140750 |
| chr11 | 120204450 | 120204550 | 1167-Lng-A-T | 72   | chr11:120204450-120204550 |
| chr11 | 120251850 | 120251950 | 1065-Lng-C-T | 74   | chr11:120251850-120251950 |
| chr11 | 120290150 | 120290250 | 1152-Lng-A-T | 67   | chr11:120290150-120290250 |
| chr11 | 120425850 | 120425950 | 1223-Lng-C-T | 57   | chr11:120425850-120425950 |
| chr11 | 120637250 | 120637350 | 1090-Lng-B-T | 142  | chr11:120637250-120637350 |
| chr11 | 120726950 | 120727050 | 1065-Lng-C-T | 128  | chr11:120726950-120727050 |
| chr11 | 120839950 | 120840050 | 1152-Lng-A-T | 39   | chr11:120839950-120840050 |
| chr11 | 121052550 | 121052650 | 1151-Lng-A-T | 232  | chr11:121052550-121052650 |
| chr11 | 121140150 | 121140250 | 846-Lng-A-T  | 49   | chr11:121140150-121140250 |
| chr11 | 121151250 | 121151350 | 1223-Lng-C-T | 221  | chr11:121151250-121151350 |
| chr11 | 121163650 | 121163750 | 1167-Lng-A-T | 113  | chr11:121163650-121163750 |
| chr11 | 121164050 | 121164150 | 1090-Lng-B-T | 508  | chr11:121164050-121164150 |
| chr11 | 121276950 | 121277050 | 1167-Lng-A-T | 71   | chr11:121276950-121277050 |
| chr11 | 121296850 | 121296950 | 901-Lng-D-T  | 152  | chr11:121296850-121296950 |
| chr11 | 121399250 | 121399350 | 901-Lng-C-T  | 59   | chr11:121399250-121399350 |
| chr11 | 121402150 | 121402250 | 901-Lng-C-T  | 2894 | chr11:121402150-121402250 |
| chr11 | 121801750 | 121801850 | 1223-Lng-C-T | 59   | chr11:121801750-121801850 |
| chr12 | 3109950   | 3110050   | 1152-Lng-A-T | 34   | chr12:3109950-3110050     |
| chr12 | 3117550   | 3117650   | 1223-Lng-C-T | 43   | chr12:3117550-3117650     |
| chr12 | 3270950   | 3271050   | 1223-Lng-D-T | 44   | chr12:3270950-3271050     |
| chr12 | 3273750   | 3273850   | 1223-Lng-C-T | 71   | chr12:3273750-3273850     |
| chr12 | 3289150   | 3289250   | 1223-Lng-B-T | 46   | chr12:3289150-3289250     |
| chr12 | 3397650   | 3397750   | 1065-Lng-A-T | 391  | chr12:3397650-3397750     |
| chr12 | 3397750   | 3397850   | 1004-Lng-A-T | 59   | chr12:3397750-3397850     |
| chr12 | 3408850   | 3408950   | 901-Lng-A-T  | 75   | chr12:3408850-3408950     |
| chr12 | 3439750   | 3439850   | 1274-Lng-A-T | 50   | chr12:3439750-3439850     |
| chr12 | 3440150   | 3440250   | 1274-Lng-A-T | 52   | chr12:3440150-3440250     |
| chr12 | 3464350   | 3464450   | 901-Lng-D-T  | 886  | chr12:3464350-3464450     |
| chr12 | 3464350   | 3464450   | 1167-Lng-A-T | 52   | chr12:3464350-3464450     |
| chr12 | 3466250   | 3466350   | 901-Lng-C-T  | 219  | chr12:3466250-3466350     |

**Table S2: SB Insertion regions**

|       |         |         |              |      |                       |
|-------|---------|---------|--------------|------|-----------------------|
| chr12 | 3467650 | 3467750 | 846-Lng-A-T  | 1293 | chr12:3467650-3467750 |
| chr12 | 3478650 | 3478750 | 1065-Lng-C-T | 96   | chr12:3478650-3478750 |
| chr12 | 3485750 | 3485850 | 901-Lng-B-T  | 90   | chr12:3485750-3485850 |
| chr12 | 3662350 | 3662450 | 1100-Lng-A-T | 62   | chr12:3662350-3662450 |
| chr12 | 3694250 | 3694350 | 1065-Lng-B-T | 69   | chr12:3694250-3694350 |
| chr12 | 3759650 | 3759750 | 1151-Lng-A-T | 502  | chr12:3759650-3759750 |
| chr12 | 3810250 | 3810350 | 901-Lng-C-T  | 38   | chr12:3810250-3810350 |
| chr12 | 3883950 | 3884050 | 901-Lng-A-T  | 67   | chr12:3883950-3884050 |
| chr12 | 4082050 | 4082150 | 1004-Lng-A-T | 68   | chr12:4082050-4082150 |
| chr12 | 4248550 | 4248650 | 1223-Lng-A-T | 108  | chr12:4248550-4248650 |
| chr12 | 4256950 | 4257050 | 1152-Lng-A-T | 79   | chr12:4256950-4257050 |
| chr12 | 4271050 | 4271150 | 1152-Lng-A-T | 81   | chr12:4271050-4271150 |
| chr12 | 4348850 | 4348950 | 1100-Lng-B-T | 51   | chr12:4348850-4348950 |
| chr12 | 4354650 | 4354750 | 1090-Lng-A-T | 84   | chr12:4354650-4354750 |
| chr12 | 4389850 | 4389950 | 1274-Lng-A-T | 103  | chr12:4389850-4389950 |
| chr12 | 4394750 | 4394850 | 1151-Lng-A-T | 389  | chr12:4394750-4394850 |
| chr12 | 4399950 | 4400050 | 1223-Lng-D-T | 40   | chr12:4399950-4400050 |
| chr12 | 4424050 | 4424150 | 1090-Lng-A-T | 87   | chr12:4424050-4424150 |
| chr12 | 4607950 | 4608050 | 1223-Lng-B-T | 201  | chr12:4607950-4608050 |
| chr12 | 4611550 | 4611650 | 1223-Lng-D-T | 122  | chr12:4611550-4611650 |
| chr12 | 4612950 | 4613050 | 1223-Lng-A-T | 69   | chr12:4612950-4613050 |
| chr12 | 4639150 | 4639250 | 1223-Lng-A-T | 154  | chr12:4639150-4639250 |
| chr12 | 4647550 | 4647650 | 1167-Lng-A-T | 121  | chr12:4647550-4647650 |
| chr12 | 4696750 | 4696850 | 1152-Lng-A-T | 100  | chr12:4696750-4696850 |
| chr12 | 4883250 | 4883350 | 901-Lng-C-T  | 36   | chr12:4883250-4883350 |
| chr12 | 4888850 | 4888950 | 1090-Lng-A-T | 76   | chr12:4888850-4888950 |
| chr12 | 4912850 | 4912950 | 1151-Lng-A-T | 377  | chr12:4912850-4912950 |
| chr12 | 4936450 | 4936550 | 1065-Lng-B-T | 200  | chr12:4936450-4936550 |
| chr12 | 4937950 | 4938050 | 1188-Lng-A-T | 41   | chr12:4937950-4938050 |
| chr12 | 4979950 | 4980050 | 1004-Lng-A-T | 130  | chr12:4979950-4980050 |
| chr12 | 5021550 | 5021650 | 1188-Lng-A-T | 45   | chr12:5021550-5021650 |
| chr12 | 5029450 | 5029550 | 1065-Lng-B-T | 97   | chr12:5029450-5029550 |
| chr12 | 5075550 | 5075650 | 1065-Lng-C-T | 78   | chr12:5075550-5075650 |
| chr12 | 5193450 | 5193550 | 1223-Lng-C-T | 43   | chr12:5193450-5193550 |
| chr12 | 5248150 | 5248250 | 901-Lng-B-T  | 285  | chr12:5248150-5248250 |
| chr12 | 5255350 | 5255450 | 1004-Lng-A-T | 51   | chr12:5255350-5255450 |
| chr12 | 5287350 | 5287450 | 901-Lng-D-T  | 354  | chr12:5287350-5287450 |
| chr12 | 5391650 | 5391750 | 1004-Lng-A-T | 89   | chr12:5391650-5391750 |
| chr12 | 5433950 | 5434050 | 1004-Lng-A-T | 550  | chr12:5433950-5434050 |
| chr12 | 5696650 | 5696750 | 1223-Lng-B-T | 48   | chr12:5696650-5696750 |
| chr12 | 5710550 | 5710650 | 846-Lng-A-T  | 72   | chr12:5710550-5710650 |
| chr12 | 5965750 | 5965850 | 1223-Lng-B-T | 34   | chr12:5965750-5965850 |
| chr12 | 6076350 | 6076450 | 901-Lng-B-T  | 213  | chr12:6076350-6076450 |
| chr12 | 6215350 | 6215450 | 846-Lng-A-T  | 66   | chr12:6215350-6215450 |
| chr12 | 6300450 | 6300550 | 1004-Lng-A-T | 73   | chr12:6300450-6300550 |
| chr12 | 6437650 | 6437750 | 1223-Lng-B-T | 45   | chr12:6437650-6437750 |



**Table S2: SB Insertion regions**

|       |          |          |              |      |                         |
|-------|----------|----------|--------------|------|-------------------------|
| chr12 | 6551650  | 6551750  | 1065-Lng-B-T | 75   | chr12:6551650-6551750   |
| chr12 | 6820450  | 6820550  | 1004-Lng-A-T | 78   | chr12:6820450-6820550   |
| chr12 | 7076050  | 7076150  | 1100-Lng-A-T | 97   | chr12:7076050-7076150   |
| chr12 | 7077250  | 7077350  | 901-Lng-C-T  | 50   | chr12:7077250-7077350   |
| chr12 | 7189650  | 7189750  | 1004-Lng-A-T | 86   | chr12:7189650-7189750   |
| chr12 | 7392850  | 7392950  | 1100-Lng-A-T | 51   | chr12:7392850-7392950   |
| chr12 | 7409550  | 7409650  | 1090-Lng-A-T | 97   | chr12:7409550-7409650   |
| chr12 | 7546050  | 7546150  | 1223-Lng-B-T | 57   | chr12:7546050-7546150   |
| chr12 | 7609150  | 7609250  | 1152-Lng-A-T | 97   | chr12:7609150-7609250   |
| chr12 | 7693850  | 7693950  | 901-Lng-A-T  | 103  | chr12:7693850-7693950   |
| chr12 | 7695150  | 7695250  | 1223-Lng-C-T | 48   | chr12:7695150-7695250   |
| chr12 | 7822050  | 7822150  | 1065-Lng-B-T | 45   | chr12:7822050-7822150   |
| chr12 | 7861050  | 7861150  | 901-Lng-C-T  | 51   | chr12:7861050-7861150   |
| chr12 | 7885550  | 7885650  | 1274-Lng-A-T | 59   | chr12:7885550-7885650   |
| chr12 | 8251850  | 8251950  | 1152-Lng-A-T | 109  | chr12:8251850-8251950   |
| chr12 | 8256250  | 8256350  | 1004-Lng-A-T | 82   | chr12:8256250-8256350   |
| chr12 | 8343550  | 8343650  | 1004-Lng-A-T | 172  | chr12:8343550-8343650   |
| chr12 | 8452850  | 8452950  | 1100-Lng-A-T | 71   | chr12:8452850-8452950   |
| chr12 | 8575850  | 8575950  | 901-Lng-C-T  | 59   | chr12:8575850-8575950   |
| chr12 | 8577250  | 8577350  | 1004-Lng-A-T | 150  | chr12:8577250-8577350   |
| chr12 | 8687850  | 8687950  | 1004-Lng-A-T | 283  | chr12:8687850-8687950   |
| chr12 | 8694950  | 8695050  | 901-Lng-B-T  | 139  | chr12:8694950-8695050   |
| chr12 | 8705250  | 8705350  | 1152-Lng-A-T | 376  | chr12:8705250-8705350   |
| chr12 | 8722850  | 8722950  | 1090-Lng-A-T | 59   | chr12:8722850-8722950   |
| chr12 | 8738650  | 8738750  | 1223-Lng-C-T | 46   | chr12:8738650-8738750   |
| chr12 | 8875850  | 8875950  | 1004-Lng-A-T | 88   | chr12:8875850-8875950   |
| chr12 | 8896750  | 8896850  | 1223-Lng-D-T | 49   | chr12:8896750-8896850   |
| chr12 | 8921450  | 8921550  | 1065-Lng-A-T | 48   | chr12:8921450-8921550   |
| chr12 | 8934650  | 8934750  | 901-Lng-A-T  | 483  | chr12:8934650-8934750   |
| chr12 | 8935350  | 8935450  | 1004-Lng-A-T | 2018 | chr12:8935350-8935450   |
| chr12 | 8960750  | 8960850  | 1152-Lng-A-T | 59   | chr12:8960750-8960850   |
| chr12 | 9175650  | 9175750  | 1072-Lng-A-T | 191  | chr12:9175650-9175750   |
| chr12 | 9223950  | 9224050  | 1065-Lng-A-T | 44   | chr12:9223950-9224050   |
| chr12 | 9504450  | 9504550  | 1274-Lng-A-T | 91   | chr12:9504450-9504550   |
| chr12 | 9527250  | 9527350  | 1223-Lng-A-T | 147  | chr12:9527250-9527350   |
| chr12 | 9999050  | 9999150  | 1090-Lng-A-T | 57   | chr12:9999050-9999150   |
| chr12 | 10151050 | 10151150 | 1072-Lng-A-T | 241  | chr12:10151050-10151150 |
| chr12 | 10174650 | 10174750 | 846-Lng-A-T  | 48   | chr12:10174650-10174750 |
| chr12 | 10227050 | 10227150 | 1151-Lng-A-T | 220  | chr12:10227050-10227150 |
| chr12 | 10397250 | 10397350 | 901-Lng-D-T  | 50   | chr12:10397250-10397350 |
| chr12 | 10461850 | 10461950 | 1167-Lng-A-T | 111  | chr12:10461850-10461950 |
| chr12 | 10561650 | 10561750 | 1151-Lng-A-T | 162  | chr12:10561650-10561750 |
| chr12 | 10591950 | 10592050 | 1167-Lng-A-T | 108  | chr12:10591950-10592050 |
| chr12 | 10723650 | 10723750 | 1274-Lng-A-T | 149  | chr12:10723650-10723750 |
| chr12 | 10789650 | 10789750 | 1188-Lng-A-T | 146  | chr12:10789650-10789750 |
| chr12 | 11164550 | 11164650 | 1152-Lng-A-T | 62   | chr12:11164550-11164650 |

**Table S2: SB Insertion regions**

|       |          |          |              |      |                         |
|-------|----------|----------|--------------|------|-------------------------|
| chr12 | 11274750 | 11274850 | 901-Lng-B-T  | 337  | chr12:11274750-11274850 |
| chr12 | 11276050 | 11276150 | 1100-Lng-A-T | 96   | chr12:11276050-11276150 |
| chr12 | 11290150 | 11290250 | 1004-Lng-A-T | 127  | chr12:11290150-11290250 |
| chr12 | 11302050 | 11302150 | 901-Lng-C-T  | 90   | chr12:11302050-11302150 |
| chr12 | 11315350 | 11315450 | 1004-Lng-A-T | 136  | chr12:11315350-11315450 |
| chr12 | 11363350 | 11363450 | 901-Lng-A-T  | 86   | chr12:11363350-11363450 |
| chr12 | 11527550 | 11527650 | 1004-Lng-A-T | 1026 | chr12:11527550-11527650 |
| chr12 | 11628850 | 11628950 | 1065-Lng-C-T | 61   | chr12:11628850-11628950 |
| chr12 | 11656950 | 11657050 | 1065-Lng-C-T | 61   | chr12:11656950-11657050 |
| chr12 | 11686650 | 11686750 | 1100-Lng-A-T | 76   | chr12:11686650-11686750 |
| chr12 | 11729650 | 11729750 | 1223-Lng-C-T | 49   | chr12:11729650-11729750 |
| chr12 | 11768350 | 11768450 | 1188-Lng-A-T | 255  | chr12:11768350-11768450 |
| chr12 | 11813050 | 11813150 | 1004-Lng-A-T | 94   | chr12:11813050-11813150 |
| chr12 | 12020050 | 12020150 | 1152-Lng-A-T | 48   | chr12:12020050-12020150 |
| chr12 | 12498950 | 12499050 | 1065-Lng-A-T | 46   | chr12:12498950-12499050 |
| chr12 | 12618050 | 12618150 | 1065-Lng-B-T | 47   | chr12:12618050-12618150 |
| chr12 | 12701950 | 12702050 | 901-Lng-D-T  | 58   | chr12:12701950-12702050 |
| chr12 | 12771350 | 12771450 | 1274-Lng-A-T | 143  | chr12:12771350-12771450 |
| chr12 | 12815750 | 12815850 | 1274-Lng-A-T | 72   | chr12:12815750-12815850 |
| chr12 | 12841450 | 12841550 | 1167-Lng-A-T | 69   | chr12:12841450-12841550 |
| chr12 | 12872550 | 12872650 | 1065-Lng-B-T | 122  | chr12:12872550-12872650 |
| chr12 | 12876150 | 12876250 | 1004-Lng-A-T | 125  | chr12:12876150-12876250 |
| chr12 | 13046150 | 13046250 | 846-Lng-A-T  | 135  | chr12:13046150-13046250 |
| chr12 | 13186850 | 13186950 | 1100-Lng-B-T | 989  | chr12:13186850-13186950 |
| chr12 | 13253650 | 13253750 | 1004-Lng-A-T | 671  | chr12:13253650-13253750 |
| chr12 | 13284350 | 13284450 | 1274-Lng-A-T | 80   | chr12:13284350-13284450 |
| chr12 | 13291450 | 13291550 | 901-Lng-C-T  | 28   | chr12:13291450-13291550 |
| chr12 | 13300850 | 13300950 | 1072-Lng-A-T | 73   | chr12:13300850-13300950 |
| chr12 | 13324450 | 13324550 | 1065-Lng-B-T | 54   | chr12:13324450-13324550 |
| chr12 | 13416050 | 13416150 | 1004-Lng-A-T | 76   | chr12:13416050-13416150 |
| chr12 | 13488350 | 13488450 | 901-Lng-C-T  | 152  | chr12:13488350-13488450 |
| chr12 | 13569750 | 13569850 | 1004-Lng-A-T | 73   | chr12:13569750-13569850 |
| chr12 | 13637550 | 13637650 | 1188-Lng-A-T | 56   | chr12:13637550-13637650 |
| chr12 | 13821250 | 13821350 | 901-Lng-B-T  | 50   | chr12:13821250-13821350 |
| chr12 | 14028250 | 14028350 | 1090-Lng-A-T | 46   | chr12:14028250-14028350 |
| chr12 | 14031250 | 14031350 | 901-Lng-B-T  | 64   | chr12:14031250-14031350 |
| chr12 | 14688050 | 14688150 | 901-Lng-C-T  | 48   | chr12:14688050-14688150 |
| chr12 | 15111550 | 15111650 | 1004-Lng-A-T | 81   | chr12:15111550-15111650 |
| chr12 | 15183250 | 15183350 | 1274-Lng-A-T | 227  | chr12:15183250-15183350 |
| chr12 | 15289150 | 15289250 | 1004-Lng-A-T | 53   | chr12:15289150-15289250 |
| chr12 | 15496450 | 15496550 | 1004-Lng-A-T | 75   | chr12:15496450-15496550 |
| chr12 | 15808250 | 15808350 | 1223-Lng-A-T | 64   | chr12:15808250-15808350 |
| chr12 | 15987950 | 15988050 | 1065-Lng-A-T | 45   | chr12:15987950-15988050 |
| chr12 | 16205650 | 16205750 | 1223-Lng-B-T | 42   | chr12:16205650-16205750 |
| chr12 | 16224850 | 16224950 | 1152-Lng-A-T | 120  | chr12:16224850-16224950 |
| chr12 | 16250150 | 16250250 | 1004-Lng-A-T | 131  | chr12:16250150-16250250 |

**Table S2: SB Insertion regions**

|       |          |          |              |      |                         |
|-------|----------|----------|--------------|------|-------------------------|
| chr12 | 16423150 | 16423250 | 1167-Lng-A-T | 72   | chr12:16423150-16423250 |
| chr12 | 16847550 | 16847650 | 1188-Lng-A-T | 295  | chr12:16847550-16847650 |
| chr12 | 16849450 | 16849550 | 901-Lng-D-T  | 63   | chr12:16849450-16849550 |
| chr12 | 16856750 | 16856850 | 1188-Lng-A-T | 42   | chr12:16856750-16856850 |
| chr12 | 16864650 | 16864750 | 1065-Lng-A-T | 109  | chr12:16864650-16864750 |
| chr12 | 16889050 | 16889150 | 1151-Lng-A-T | 466  | chr12:16889050-16889150 |
| chr12 | 16903650 | 16903750 | 1188-Lng-A-T | 204  | chr12:16903650-16903750 |
| chr12 | 16921050 | 16921150 | 1274-Lng-A-T | 8580 | chr12:16921050-16921150 |
| chr12 | 16933250 | 16933350 | 1274-Lng-A-T | 491  | chr12:16933250-16933350 |
| chr12 | 16961550 | 16961650 | 901-Lng-D-T  | 385  | chr12:16961550-16961650 |
| chr12 | 16991350 | 16991450 | 1072-Lng-A-T | 94   | chr12:16991350-16991450 |
| chr12 | 16993350 | 16993450 | 901-Lng-C-T  | 76   | chr12:16993350-16993450 |
| chr12 | 16997550 | 16997650 | 1274-Lng-A-T | 65   | chr12:16997550-16997650 |
| chr12 | 17002350 | 17002450 | 901-Lng-A-T  | 58   | chr12:17002350-17002450 |
| chr12 | 17015150 | 17015250 | 1004-Lng-A-T | 88   | chr12:17015150-17015250 |
| chr12 | 17340750 | 17340850 | 1223-Lng-C-T | 48   | chr12:17340750-17340850 |
| chr12 | 17374250 | 17374350 | 1274-Lng-A-T | 49   | chr12:17374250-17374350 |
| chr12 | 17442450 | 17442550 | 1223-Lng-A-T | 124  | chr12:17442450-17442550 |
| chr12 | 17616650 | 17616750 | 1090-Lng-A-T | 65   | chr12:17616650-17616750 |
| chr12 | 17685150 | 17685250 | 1004-Lng-A-T | 68   | chr12:17685150-17685250 |
| chr12 | 17702650 | 17702750 | 1274-Lng-A-T | 209  | chr12:17702650-17702750 |
| chr12 | 17733550 | 17733650 | 1274-Lng-A-T | 75   | chr12:17733550-17733650 |
| chr12 | 17768650 | 17768750 | 1274-Lng-A-T | 61   | chr12:17768650-17768750 |
| chr12 | 17772550 | 17772650 | 1274-Lng-A-T | 83   | chr12:17772550-17772650 |
| chr12 | 17779650 | 17779750 | 1274-Lng-A-T | 52   | chr12:17779650-17779750 |
| chr12 | 17783550 | 17783650 | 901-Lng-B-T  | 141  | chr12:17783550-17783650 |
| chr12 | 17908450 | 17908550 | 1065-Lng-C-T | 63   | chr12:17908450-17908550 |
| chr12 | 17913750 | 17913850 | 1223-Lng-B-T | 127  | chr12:17913750-17913850 |
| chr12 | 17938550 | 17938650 | 1004-Lng-A-T | 68   | chr12:17938550-17938650 |
| chr12 | 18248250 | 18248350 | 901-Lng-C-T  | 74   | chr12:18248250-18248350 |
| chr12 | 18275950 | 18276050 | 1100-Lng-A-T | 108  | chr12:18275950-18276050 |
| chr12 | 19019950 | 19020050 | 1072-Lng-A-T | 77   | chr12:19019950-19020050 |
| chr12 | 19103150 | 19103250 | 1004-Lng-A-T | 52   | chr12:19103150-19103250 |
| chr12 | 20196950 | 20197050 | 1065-Lng-B-T | 43   | chr12:20196950-20197050 |
| chr12 | 20229350 | 20229450 | 901-Lng-A-T  | 56   | chr12:20229350-20229450 |
| chr12 | 21075150 | 21075250 | 1223-Lng-D-T | 52   | chr12:21075150-21075250 |
| chr12 | 21149350 | 21149450 | 1167-Lng-A-T | 142  | chr12:21149350-21149450 |
| chr12 | 21151350 | 21151450 | 1072-Lng-A-T | 102  | chr12:21151350-21151450 |
| chr12 | 21175250 | 21175350 | 901-Lng-C-T  | 450  | chr12:21175250-21175350 |
| chr12 | 21181550 | 21181650 | 846-Lng-A-T  | 74   | chr12:21181550-21181650 |
| chr12 | 21185350 | 21185450 | 846-Lng-A-T  | 85   | chr12:21185350-21185450 |
| chr12 | 21228650 | 21228750 | 1004-Lng-A-T | 74   | chr12:21228650-21228750 |
| chr12 | 21265750 | 21265850 | 901-Lng-C-T  | 34   | chr12:21265750-21265850 |
| chr12 | 21266950 | 21267050 | 901-Lng-C-T  | 264  | chr12:21266950-21267050 |
| chr12 | 21274150 | 21274250 | 1004-Lng-A-T | 60   | chr12:21274150-21274250 |
| chr12 | 21309850 | 21309950 | 1274-Lng-A-T | 86   | chr12:21309850-21309950 |

**Table S2: SB Insertion regions**

|       |          |          |              |      |                         |
|-------|----------|----------|--------------|------|-------------------------|
| chr12 | 21317250 | 21317350 | 1274-Lng-A-T | 186  | chr12:21317250-21317350 |
| chr12 | 21327750 | 21327850 | 1100-Lng-A-T | 112  | chr12:21327750-21327850 |
| chr12 | 21329350 | 21329450 | 1065-Lng-C-T | 85   | chr12:21329350-21329450 |
| chr12 | 21356350 | 21356450 | 1065-Lng-B-T | 87   | chr12:21356350-21356450 |
| chr12 | 21390750 | 21390850 | 1152-Lng-A-T | 853  | chr12:21390750-21390850 |
| chr12 | 21396450 | 21396550 | 1274-Lng-A-T | 108  | chr12:21396450-21396550 |
| chr12 | 21420050 | 21420150 | 1100-Lng-A-T | 128  | chr12:21420050-21420150 |
| chr12 | 21482150 | 21482250 | 901-Lng-A-T  | 69   | chr12:21482150-21482250 |
| chr12 | 22047350 | 22047450 | 1100-Lng-A-T | 69   | chr12:22047350-22047450 |
| chr12 | 22073150 | 22073250 | 1223-Lng-B-T | 221  | chr12:22073150-22073250 |
| chr12 | 23238350 | 23238450 | 1090-Lng-A-T | 53   | chr12:23238350-23238450 |
| chr12 | 25578250 | 25578350 | 901-Lng-C-T  | 321  | chr12:25578250-25578350 |
| chr12 | 25614650 | 25614750 | 1004-Lng-A-T | 121  | chr12:25614650-25614750 |
| chr12 | 25676950 | 25677050 | 901-Lng-A-T  | 93   | chr12:25676950-25677050 |
| chr12 | 25684850 | 25684950 | 1152-Lng-A-T | 78   | chr12:25684850-25684950 |
| chr12 | 25901350 | 25901450 | 901-Lng-A-T  | 103  | chr12:25901350-25901450 |
| chr12 | 26086150 | 26086250 | 1100-Lng-A-T | 117  | chr12:26086150-26086250 |
| chr12 | 26362950 | 26363050 | 901-Lng-C-T  | 105  | chr12:26362950-26363050 |
| chr12 | 26580850 | 26580950 | 901-Lng-A-T  | 360  | chr12:26580850-26580950 |
| chr12 | 26812650 | 26812750 | 1065-Lng-B-T | 42   | chr12:26812650-26812750 |
| chr12 | 26846850 | 26846950 | 1090-Lng-A-T | 614  | chr12:26846850-26846950 |
| chr12 | 27068650 | 27068750 | 1274-Lng-A-T | 73   | chr12:27068650-27068750 |
| chr12 | 27201950 | 27202050 | 901-Lng-C-T  | 273  | chr12:27201950-27202050 |
| chr12 | 27308450 | 27308550 | 1188-Lng-A-T | 258  | chr12:27308450-27308550 |
| chr12 | 27647550 | 27647650 | 1065-Lng-A-T | 60   | chr12:27647550-27647650 |
| chr12 | 27913050 | 27913150 | 1100-Lng-A-T | 131  | chr12:27913050-27913150 |
| chr12 | 27939850 | 27939950 | 1152-Lng-A-T | 64   | chr12:27939850-27939950 |
| chr12 | 28048350 | 28048450 | 846-Lng-A-T  | 130  | chr12:28048350-28048450 |
| chr12 | 28506250 | 28506350 | 1090-Lng-B-T | 110  | chr12:28506250-28506350 |
| chr12 | 28614150 | 28614250 | 1090-Lng-A-T | 51   | chr12:28614150-28614250 |
| chr12 | 28769650 | 28769750 | 1004-Lng-A-T | 97   | chr12:28769650-28769750 |
| chr12 | 28771350 | 28771450 | 1223-Lng-A-T | 1728 | chr12:28771350-28771450 |
| chr12 | 29087850 | 29087950 | 901-Lng-C-T  | 7578 | chr12:29087850-29087950 |
| chr12 | 29184150 | 29184250 | 1065-Lng-A-T | 44   | chr12:29184150-29184250 |
| chr12 | 29362850 | 29362950 | 846-Lng-A-T  | 669  | chr12:29362850-29362950 |
| chr12 | 29471450 | 29471550 | 1072-Lng-A-T | 165  | chr12:29471450-29471550 |
| chr12 | 29495050 | 29495150 | 1065-Lng-C-T | 104  | chr12:29495050-29495150 |
| chr12 | 29924050 | 29924150 | 1223-Lng-B-T | 190  | chr12:29924050-29924150 |
| chr12 | 30361350 | 30361450 | 901-Lng-D-T  | 447  | chr12:30361350-30361450 |
| chr12 | 30370950 | 30371050 | 1004-Lng-A-T | 63   | chr12:30370950-30371050 |
| chr12 | 30590650 | 30590750 | 1274-Lng-A-T | 88   | chr12:30590650-30590750 |
| chr12 | 30650550 | 30650650 | 1223-Lng-B-T | 53   | chr12:30650550-30650650 |
| chr12 | 30847650 | 30847750 | 846-Lng-A-T  | 113  | chr12:30847650-30847750 |
| chr12 | 30938450 | 30938550 | 901-Lng-C-T  | 234  | chr12:30938450-30938550 |
| chr12 | 31264050 | 31264150 | 1223-Lng-B-T | 153  | chr12:31264050-31264150 |
| chr12 | 31291050 | 31291150 | 901-Lng-B-T  | 54   | chr12:31291050-31291150 |

**Table S2: SB Insertion regions**

|       |          |          |              |     |                         |
|-------|----------|----------|--------------|-----|-------------------------|
| chr12 | 31358950 | 31359050 | 1065-Lng-A-T | 50  | chr12:31358950-31359050 |
| chr12 | 31537850 | 31537950 | 1274-Lng-A-T | 76  | chr12:31537850-31537950 |
| chr12 | 31578450 | 31578550 | 901-Lng-A-T  | 163 | chr12:31578450-31578550 |
| chr12 | 31710250 | 31710350 | 1004-Lng-A-T | 89  | chr12:31710250-31710350 |
| chr12 | 31740950 | 31741050 | 1167-Lng-A-T | 225 | chr12:31740950-31741050 |
| chr12 | 31779150 | 31779250 | 1004-Lng-A-T | 76  | chr12:31779150-31779250 |
| chr12 | 31914050 | 31914150 | 1152-Lng-A-T | 32  | chr12:31914050-31914150 |
| chr12 | 31914750 | 31914850 | 846-Lng-A-T  | 102 | chr12:31914750-31914850 |
| chr12 | 32363450 | 32363550 | 1065-Lng-B-T | 60  | chr12:32363450-32363550 |
| chr12 | 32396150 | 32396250 | 1072-Lng-A-T | 49  | chr12:32396150-32396250 |
| chr12 | 32415450 | 32415550 | 1004-Lng-A-T | 162 | chr12:32415450-32415550 |
| chr12 | 32465950 | 32466050 | 1072-Lng-A-T | 54  | chr12:32465950-32466050 |
| chr12 | 32494050 | 32494150 | 1223-Lng-B-T | 130 | chr12:32494050-32494150 |
| chr12 | 32500750 | 32500850 | 1223-Lng-A-T | 369 | chr12:32500750-32500850 |
| chr12 | 32535050 | 32535150 | 901-Lng-C-T  | 37  | chr12:32535050-32535150 |
| chr12 | 32601150 | 32601250 | 1100-Lng-B-T | 72  | chr12:32601150-32601250 |
| chr12 | 32606450 | 32606550 | 1167-Lng-A-T | 107 | chr12:32606450-32606550 |
| chr12 | 32624050 | 32624150 | 1223-Lng-D-T | 45  | chr12:32624050-32624150 |
| chr12 | 32641350 | 32641450 | 901-Lng-A-T  | 88  | chr12:32641350-32641450 |
| chr12 | 32837250 | 32837350 | 1090-Lng-B-T | 97  | chr12:32837250-32837350 |
| chr12 | 33009650 | 33009750 | 901-Lng-D-T  | 39  | chr12:33009650-33009750 |
| chr12 | 33027550 | 33027650 | 1065-Lng-B-T | 46  | chr12:33027550-33027650 |
| chr12 | 33035450 | 33035550 | 1152-Lng-A-T | 52  | chr12:33035450-33035550 |
| chr12 | 33092850 | 33092950 | 1223-Lng-B-T | 309 | chr12:33092850-33092950 |
| chr12 | 33122350 | 33122450 | 1274-Lng-A-T | 121 | chr12:33122350-33122450 |
| chr12 | 33143250 | 33143350 | 901-Lng-C-T  | 225 | chr12:33143250-33143350 |
| chr12 | 33153650 | 33153750 | 1188-Lng-A-T | 60  | chr12:33153650-33153750 |
| chr12 | 33174950 | 33175050 | 901-Lng-A-T  | 54  | chr12:33174950-33175050 |
| chr12 | 33323950 | 33324050 | 1065-Lng-C-T | 80  | chr12:33323950-33324050 |
| chr12 | 33368850 | 33368950 | 1274-Lng-A-T | 78  | chr12:33368850-33368950 |
| chr12 | 33511950 | 33512050 | 1223-Lng-A-T | 160 | chr12:33511950-33512050 |
| chr12 | 33620850 | 33620950 | 1274-Lng-A-T | 103 | chr12:33620850-33620950 |
| chr12 | 33621050 | 33621150 | 1100-Lng-A-T | 170 | chr12:33621050-33621150 |
| chr12 | 33643250 | 33643350 | 1152-Lng-A-T | 73  | chr12:33643250-33643350 |
| chr12 | 33643350 | 33643450 | 1090-Lng-A-T | 80  | chr12:33643350-33643450 |
| chr12 | 33659450 | 33659550 | 1100-Lng-A-T | 156 | chr12:33659450-33659550 |
| chr12 | 33722150 | 33722250 | 1004-Lng-A-T | 156 | chr12:33722150-33722250 |
| chr12 | 33730950 | 33731050 | 846-Lng-A-T  | 107 | chr12:33730950-33731050 |
| chr12 | 33853550 | 33853650 | 1151-Lng-A-T | 325 | chr12:33853550-33853650 |
| chr12 | 33853650 | 33853750 | 1004-Lng-A-T | 109 | chr12:33853650-33853750 |
| chr12 | 33857550 | 33857650 | 901-Lng-A-T  | 512 | chr12:33857550-33857650 |
| chr12 | 33932750 | 33932850 | 1223-Lng-B-T | 48  | chr12:33932750-33932850 |
| chr12 | 33983650 | 33983750 | 1167-Lng-A-T | 56  | chr12:33983650-33983750 |
| chr12 | 33986150 | 33986250 | 1004-Lng-A-T | 162 | chr12:33986150-33986250 |
| chr12 | 34110050 | 34110150 | 1274-Lng-A-T | 102 | chr12:34110050-34110150 |
| chr12 | 34126650 | 34126750 | 1065-Lng-B-T | 57  | chr12:34126650-34126750 |

**Table S2: SB Insertion regions**

|       |          |          |              |      |                         |
|-------|----------|----------|--------------|------|-------------------------|
| chr12 | 34378950 | 34379050 | 1223-Lng-A-T | 146  | chr12:34378950-34379050 |
| chr12 | 34393950 | 34394050 | 1188-Lng-A-T | 203  | chr12:34393950-34394050 |
| chr12 | 34475150 | 34475250 | 1151-Lng-A-T | 182  | chr12:34475150-34475250 |
| chr12 | 34586650 | 34586750 | 1065-Lng-B-T | 47   | chr12:34586650-34586750 |
| chr12 | 34740650 | 34740750 | 901-Lng-D-T  | 419  | chr12:34740650-34740750 |
| chr12 | 34740650 | 34740750 | 1090-Lng-B-T | 780  | chr12:34740650-34740750 |
| chr12 | 34760850 | 34760950 | 1004-Lng-A-T | 58   | chr12:34760850-34760950 |
| chr12 | 34768750 | 34768850 | 1152-Lng-A-T | 460  | chr12:34768750-34768850 |
| chr12 | 34792550 | 34792650 | 1167-Lng-A-T | 88   | chr12:34792550-34792650 |
| chr12 | 34864850 | 34864950 | 1072-Lng-A-T | 161  | chr12:34864850-34864950 |
| chr12 | 34913550 | 34913650 | 901-Lng-C-T  | 48   | chr12:34913550-34913650 |
| chr12 | 34939750 | 34939850 | 1223-Lng-A-T | 55   | chr12:34939750-34939850 |
| chr12 | 34995350 | 34995450 | 1167-Lng-A-T | 60   | chr12:34995350-34995450 |
| chr12 | 35037650 | 35037750 | 901-Lng-B-T  | 72   | chr12:35037650-35037750 |
| chr12 | 35075850 | 35075950 | 1004-Lng-A-T | 244  | chr12:35075850-35075950 |
| chr12 | 35158950 | 35159050 | 1004-Lng-A-T | 67   | chr12:35158950-35159050 |
| chr12 | 35251150 | 35251250 | 1065-Lng-C-T | 106  | chr12:35251150-35251250 |
| chr12 | 35266950 | 35267050 | 1223-Lng-D-T | 40   | chr12:35266950-35267050 |
| chr12 | 35359050 | 35359150 | 1274-Lng-A-T | 65   | chr12:35359050-35359150 |
| chr12 | 35425450 | 35425550 | 1188-Lng-A-T | 35   | chr12:35425450-35425550 |
| chr12 | 35462950 | 35463050 | 1274-Lng-A-T | 86   | chr12:35462950-35463050 |
| chr12 | 35605050 | 35605150 | 1004-Lng-A-T | 82   | chr12:35605050-35605150 |
| chr12 | 35691750 | 35691850 | 1065-Lng-C-T | 1087 | chr12:35691750-35691850 |
| chr12 | 35733350 | 35733450 | 1274-Lng-A-T | 135  | chr12:35733350-35733450 |
| chr12 | 35767450 | 35767550 | 1274-Lng-A-T | 135  | chr12:35767450-35767550 |
| chr12 | 35774550 | 35774650 | 901-Lng-A-T  | 57   | chr12:35774550-35774650 |
| chr12 | 35780950 | 35781050 | 1004-Lng-A-T | 53   | chr12:35780950-35781050 |
| chr12 | 35796850 | 35796950 | 1065-Lng-B-T | 89   | chr12:35796850-35796950 |
| chr12 | 35815050 | 35815150 | 1004-Lng-A-T | 60   | chr12:35815050-35815150 |
| chr12 | 35822050 | 35822150 | 901-Lng-C-T  | 29   | chr12:35822050-35822150 |
| chr12 | 35834850 | 35834950 | 1004-Lng-A-T | 90   | chr12:35834850-35834950 |
| chr12 | 35883850 | 35883950 | 901-Lng-C-T  | 57   | chr12:35883850-35883950 |
| chr12 | 36183050 | 36183150 | 901-Lng-A-T  | 75   | chr12:36183050-36183150 |
| chr12 | 36301350 | 36301450 | 1274-Lng-A-T | 99   | chr12:36301350-36301450 |
| chr12 | 36612950 | 36613050 | 846-Lng-A-T  | 78   | chr12:36612950-36613050 |
| chr12 | 36774050 | 36774150 | 1072-Lng-A-T | 156  | chr12:36774050-36774150 |
| chr12 | 36879250 | 36879350 | 1065-Lng-C-T | 127  | chr12:36879250-36879350 |
| chr12 | 36909550 | 36909650 | 901-Lng-D-T  | 923  | chr12:36909550-36909650 |
| chr12 | 36954550 | 36954650 | 901-Lng-B-T  | 39   | chr12:36954550-36954650 |
| chr12 | 36984850 | 36984950 | 1167-Lng-A-T | 53   | chr12:36984850-36984950 |
| chr12 | 37049250 | 37049350 | 846-Lng-A-T  | 162  | chr12:37049250-37049350 |
| chr12 | 37062150 | 37062250 | 1100-Lng-A-T | 114  | chr12:37062150-37062250 |
| chr12 | 37094050 | 37094150 | 1065-Lng-C-T | 743  | chr12:37094050-37094150 |
| chr12 | 37121450 | 37121550 | 1188-Lng-A-T | 51   | chr12:37121450-37121550 |
| chr12 | 37200150 | 37200250 | 1152-Lng-A-T | 70   | chr12:37200150-37200250 |
| chr12 | 37238350 | 37238450 | 901-Lng-C-T  | 55   | chr12:37238350-37238450 |

**Table S2: SB Insertion regions**

|       |          |          |              |      |                         |
|-------|----------|----------|--------------|------|-------------------------|
| chr12 | 37295950 | 37296050 | 1065-Lng-C-T | 105  | chr12:37295950-37296050 |
| chr12 | 37404650 | 37404750 | 846-Lng-A-T  | 76   | chr12:37404650-37404750 |
| chr12 | 37438450 | 37438550 | 1065-Lng-A-T | 63   | chr12:37438450-37438550 |
| chr12 | 37761250 | 37761350 | 1100-Lng-A-T | 97   | chr12:37761250-37761350 |
| chr12 | 37825750 | 37825850 | 901-Lng-C-T  | 32   | chr12:37825750-37825850 |
| chr12 | 37865950 | 37866050 | 1004-Lng-A-T | 495  | chr12:37865950-37866050 |
| chr12 | 37987550 | 37987650 | 1223-Lng-B-T | 76   | chr12:37987550-37987650 |
| chr12 | 38036550 | 38036650 | 1065-Lng-A-T | 36   | chr12:38036550-38036650 |
| chr12 | 38076050 | 38076150 | 1065-Lng-C-T | 110  | chr12:38076050-38076150 |
| chr12 | 38173150 | 38173250 | 846-Lng-A-T  | 90   | chr12:38173150-38173250 |
| chr12 | 38182050 | 38182150 | 1223-Lng-B-T | 318  | chr12:38182050-38182150 |
| chr12 | 38191750 | 38191850 | 1065-Lng-A-T | 116  | chr12:38191750-38191850 |
| chr12 | 38211050 | 38211150 | 1274-Lng-A-T | 49   | chr12:38211050-38211150 |
| chr12 | 38218550 | 38218650 | 901-Lng-D-T  | 297  | chr12:38218550-38218650 |
| chr12 | 38234550 | 38234650 | 1090-Lng-A-T | 53   | chr12:38234550-38234650 |
| chr12 | 38311450 | 38311550 | 901-Lng-D-T  | 150  | chr12:38311450-38311550 |
| chr12 | 38353850 | 38353950 | 1223-Lng-D-T | 59   | chr12:38353850-38353950 |
| chr12 | 38561450 | 38561550 | 1004-Lng-A-T | 52   | chr12:38561450-38561550 |
| chr12 | 38625050 | 38625150 | 1151-Lng-A-T | 432  | chr12:38625050-38625150 |
| chr12 | 38639250 | 38639350 | 901-Lng-B-T  | 230  | chr12:38639250-38639350 |
| chr12 | 38654250 | 38654350 | 1004-Lng-A-T | 101  | chr12:38654250-38654350 |
| chr12 | 38700950 | 38701050 | 901-Lng-B-T  | 37   | chr12:38700950-38701050 |
| chr12 | 38854450 | 38854550 | 1274-Lng-A-T | 50   | chr12:38854450-38854550 |
| chr12 | 38863650 | 38863750 | 1167-Lng-A-T | 95   | chr12:38863650-38863750 |
| chr12 | 39118150 | 39118250 | 1274-Lng-A-T | 92   | chr12:39118150-39118250 |
| chr12 | 39119450 | 39119550 | 1274-Lng-A-T | 178  | chr12:39119450-39119550 |
| chr12 | 39268750 | 39268850 | 1065-Lng-B-T | 59   | chr12:39268750-39268850 |
| chr12 | 39285550 | 39285650 | 1274-Lng-A-T | 67   | chr12:39285550-39285650 |
| chr12 | 39285550 | 39285650 | 1065-Lng-B-T | 77   | chr12:39285550-39285650 |
| chr12 | 39288350 | 39288450 | 1004-Lng-A-T | 86   | chr12:39288350-39288450 |
| chr12 | 39342150 | 39342250 | 1004-Lng-A-T | 121  | chr12:39342150-39342250 |
| chr12 | 39482050 | 39482150 | 1072-Lng-A-T | 213  | chr12:39482050-39482150 |
| chr12 | 39507250 | 39507350 | 1188-Lng-A-T | 77   | chr12:39507250-39507350 |
| chr12 | 39508850 | 39508950 | 1274-Lng-A-T | 71   | chr12:39508850-39508950 |
| chr12 | 39564950 | 39565050 | 1004-Lng-A-T | 55   | chr12:39564950-39565050 |
| chr12 | 39807150 | 39807250 | 901-Lng-C-T  | 1258 | chr12:39807150-39807250 |
| chr12 | 39834150 | 39834250 | 1223-Lng-B-T | 59   | chr12:39834150-39834250 |
| chr12 | 39871450 | 39871550 | 1152-Lng-A-T | 59   | chr12:39871450-39871550 |
| chr12 | 39926950 | 39927050 | 1004-Lng-A-T | 49   | chr12:39926950-39927050 |
| chr12 | 40206750 | 40206850 | 1004-Lng-A-T | 96   | chr12:40206750-40206850 |
| chr12 | 40532150 | 40532250 | 846-Lng-A-T  | 84   | chr12:40532150-40532250 |
| chr12 | 40673050 | 40673150 | 1223-Lng-D-T | 52   | chr12:40673050-40673150 |
| chr12 | 40744950 | 40745050 | 1090-Lng-B-T | 426  | chr12:40744950-40745050 |
| chr12 | 40816650 | 40816750 | 1223-Lng-B-T | 162  | chr12:40816650-40816750 |
| chr12 | 40826650 | 40826750 | 1004-Lng-A-T | 157  | chr12:40826650-40826750 |
| chr12 | 40897450 | 40897550 | 1065-Lng-B-T | 41   | chr12:40897450-40897550 |

**Table S2: SB Insertion regions**

|       |          |          |              |     |                         |
|-------|----------|----------|--------------|-----|-------------------------|
| chr12 | 40948450 | 40948550 | 1274-Lng-A-T | 715 | chr12:40948450-40948550 |
| chr12 | 40952550 | 40952650 | 1223-Lng-A-T | 57  | chr12:40952550-40952650 |
| chr12 | 40983150 | 40983250 | 1152-Lng-A-T | 63  | chr12:40983150-40983250 |
| chr12 | 41054250 | 41054350 | 1167-Lng-A-T | 70  | chr12:41054250-41054350 |
| chr12 | 41055150 | 41055250 | 1223-Lng-D-T | 59  | chr12:41055150-41055250 |
| chr12 | 41095450 | 41095550 | 1004-Lng-A-T | 368 | chr12:41095450-41095550 |
| chr12 | 41106650 | 41106750 | 1188-Lng-A-T | 39  | chr12:41106650-41106750 |
| chr12 | 41122850 | 41122950 | 1004-Lng-A-T | 65  | chr12:41122850-41122950 |
| chr12 | 41175750 | 41175850 | 1100-Lng-A-T | 81  | chr12:41175750-41175850 |
| chr12 | 41202550 | 41202650 | 901-Lng-B-T  | 87  | chr12:41202550-41202650 |
| chr12 | 41207850 | 41207950 | 1151-Lng-A-T | 69  | chr12:41207850-41207950 |
| chr12 | 41226750 | 41226850 | 1274-Lng-A-T | 197 | chr12:41226750-41226850 |
| chr12 | 41236450 | 41236550 | 1100-Lng-A-T | 57  | chr12:41236450-41236550 |
| chr12 | 41251550 | 41251650 | 1223-Lng-B-T | 203 | chr12:41251550-41251650 |
| chr12 | 41251550 | 41251650 | 1065-Lng-B-T | 531 | chr12:41251550-41251650 |
| chr12 | 41269450 | 41269550 | 1004-Lng-A-T | 414 | chr12:41269450-41269550 |
| chr12 | 41278350 | 41278450 | 901-Lng-A-T  | 178 | chr12:41278350-41278450 |
| chr12 | 41374050 | 41374150 | 1090-Lng-A-T | 54  | chr12:41374050-41374150 |
| chr12 | 41384550 | 41384650 | 1167-Lng-A-T | 53  | chr12:41384550-41384650 |
| chr12 | 41419850 | 41419950 | 1065-Lng-B-T | 69  | chr12:41419850-41419950 |
| chr12 | 41478750 | 41478850 | 1151-Lng-A-T | 54  | chr12:41478750-41478850 |
| chr12 | 41491650 | 41491750 | 1065-Lng-B-T | 76  | chr12:41491650-41491750 |
| chr12 | 41517250 | 41517350 | 1065-Lng-B-T | 59  | chr12:41517250-41517350 |
| chr12 | 41713050 | 41713150 | 1004-Lng-A-T | 53  | chr12:41713050-41713150 |
| chr12 | 41875050 | 41875150 | 846-Lng-A-T  | 55  | chr12:41875050-41875150 |
| chr12 | 42024050 | 42024150 | 1223-Lng-B-T | 59  | chr12:42024050-42024150 |
| chr12 | 42062450 | 42062550 | 1065-Lng-C-T | 79  | chr12:42062450-42062550 |
| chr12 | 42064150 | 42064250 | 1065-Lng-C-T | 74  | chr12:42064150-42064250 |
| chr12 | 42195750 | 42195850 | 1274-Lng-A-T | 71  | chr12:42195750-42195850 |
| chr12 | 42210350 | 42210450 | 1004-Lng-A-T | 73  | chr12:42210350-42210450 |
| chr12 | 42762750 | 42762850 | 1065-Lng-B-T | 54  | chr12:42762750-42762850 |
| chr12 | 42766250 | 42766350 | 1090-Lng-B-T | 417 | chr12:42766250-42766350 |
| chr12 | 43061850 | 43061950 | 1004-Lng-A-T | 170 | chr12:43061850-43061950 |
| chr12 | 43264950 | 43265050 | 901-Lng-B-T  | 795 | chr12:43264950-43265050 |
| chr12 | 43394150 | 43394250 | 1090-Lng-A-T | 143 | chr12:43394150-43394250 |
| chr12 | 43497250 | 43497350 | 1065-Lng-B-T | 82  | chr12:43497250-43497350 |
| chr12 | 43751950 | 43752050 | 901-Lng-A-T  | 99  | chr12:43751950-43752050 |
| chr12 | 43830750 | 43830850 | 901-Lng-C-T  | 39  | chr12:43830750-43830850 |
| chr12 | 44075550 | 44075650 | 1188-Lng-A-T | 221 | chr12:44075550-44075650 |
| chr12 | 44361450 | 44361550 | 1152-Lng-A-T | 412 | chr12:44361450-44361550 |
| chr12 | 44384250 | 44384350 | 1065-Lng-C-T | 72  | chr12:44384250-44384350 |
| chr12 | 44491850 | 44491950 | 1223-Lng-B-T | 39  | chr12:44491850-44491950 |
| chr12 | 44491950 | 44492050 | 1223-Lng-B-T | 676 | chr12:44491950-44492050 |
| chr12 | 44674450 | 44674550 | 901-Lng-B-T  | 116 | chr12:44674450-44674550 |
| chr12 | 44781750 | 44781850 | 1167-Lng-A-T | 53  | chr12:44781750-44781850 |
| chr12 | 44797750 | 44797850 | 1090-Lng-A-T | 87  | chr12:44797750-44797850 |



**Table S2: SB Insertion regions**

|       |          |          |              |     |                         |
|-------|----------|----------|--------------|-----|-------------------------|
| chr12 | 45053550 | 45053650 | 1004-Lng-A-T | 104 | chr12:45053550-45053650 |
| chr12 | 45132150 | 45132250 | 1065-Lng-A-T | 90  | chr12:45132150-45132250 |
| chr12 | 45132250 | 45132350 | 1152-Lng-A-T | 65  | chr12:45132250-45132350 |
| chr12 | 45231550 | 45231650 | 1100-Lng-A-T | 99  | chr12:45231550-45231650 |
| chr12 | 45391050 | 45391150 | 1072-Lng-A-T | 49  | chr12:45391050-45391150 |
| chr12 | 45433650 | 45433750 | 1072-Lng-A-T | 133 | chr12:45433650-45433750 |
| chr12 | 45472150 | 45472250 | 1004-Lng-A-T | 361 | chr12:45472150-45472250 |
| chr12 | 45528350 | 45528450 | 1274-Lng-A-T | 125 | chr12:45528350-45528450 |
| chr12 | 45616550 | 45616650 | 1223-Lng-B-T | 115 | chr12:45616550-45616650 |
| chr12 | 45618150 | 45618250 | 1274-Lng-A-T | 70  | chr12:45618150-45618250 |
| chr12 | 45683850 | 45683950 | 1065-Lng-A-T | 80  | chr12:45683850-45683950 |
| chr12 | 45839350 | 45839450 | 901-Lng-B-T  | 374 | chr12:45839350-45839450 |
| chr12 | 45899450 | 45899550 | 1152-Lng-A-T | 106 | chr12:45899450-45899550 |
| chr12 | 46014750 | 46014850 | 1065-Lng-B-T | 56  | chr12:46014750-46014850 |
| chr12 | 46085650 | 46085750 | 1065-Lng-A-T | 61  | chr12:46085650-46085750 |
| chr12 | 46125750 | 46125850 | 1065-Lng-C-T | 72  | chr12:46125750-46125850 |
| chr12 | 46129150 | 46129250 | 901-Lng-C-T  | 37  | chr12:46129150-46129250 |
| chr12 | 46160150 | 46160250 | 1274-Lng-A-T | 51  | chr12:46160150-46160250 |
| chr12 | 46161550 | 46161650 | 901-Lng-C-T  | 36  | chr12:46161550-46161650 |
| chr12 | 46167350 | 46167450 | 901-Lng-C-T  | 44  | chr12:46167350-46167450 |
| chr12 | 46432850 | 46432950 | 901-Lng-D-T  | 418 | chr12:46432850-46432950 |
| chr12 | 46441750 | 46441850 | 1004-Lng-A-T | 78  | chr12:46441750-46441850 |
| chr12 | 46512250 | 46512350 | 1065-Lng-A-T | 58  | chr12:46512250-46512350 |
| chr12 | 46535650 | 46535750 | 901-Lng-C-T  | 48  | chr12:46535650-46535750 |
| chr12 | 46807650 | 46807750 | 1223-Lng-B-T | 229 | chr12:46807650-46807750 |
| chr12 | 46846150 | 46846250 | 1065-Lng-B-T | 44  | chr12:46846150-46846250 |
| chr12 | 46931550 | 46931650 | 1004-Lng-A-T | 50  | chr12:46931550-46931650 |
| chr12 | 46960250 | 46960350 | 1223-Lng-C-T | 58  | chr12:46960250-46960350 |
| chr12 | 46968150 | 46968250 | 901-Lng-B-T  | 108 | chr12:46968150-46968250 |
| chr12 | 46997550 | 46997650 | 901-Lng-A-T  | 402 | chr12:46997550-46997650 |
| chr12 | 47011950 | 47012050 | 1100-Lng-A-T | 71  | chr12:47011950-47012050 |
| chr12 | 47123950 | 47124050 | 1188-Lng-A-T | 131 | chr12:47123950-47124050 |
| chr12 | 47233650 | 47233750 | 1090-Lng-B-T | 514 | chr12:47233650-47233750 |
| chr12 | 47412950 | 47413050 | 901-Lng-D-T  | 249 | chr12:47412950-47413050 |
| chr12 | 47418350 | 47418450 | 901-Lng-B-T  | 145 | chr12:47418350-47418450 |
| chr12 | 47505050 | 47505150 | 1274-Lng-A-T | 64  | chr12:47505050-47505150 |
| chr12 | 47509850 | 47509950 | 1004-Lng-A-T | 80  | chr12:47509850-47509950 |
| chr12 | 47679650 | 47679750 | 1274-Lng-A-T | 50  | chr12:47679650-47679750 |
| chr12 | 47696250 | 47696350 | 901-Lng-B-T  | 50  | chr12:47696250-47696350 |
| chr12 | 47708750 | 47708850 | 1100-Lng-A-T | 136 | chr12:47708750-47708850 |
| chr12 | 47826850 | 47826950 | 901-Lng-D-T  | 863 | chr12:47826850-47826950 |
| chr12 | 47915650 | 47915750 | 846-Lng-A-T  | 48  | chr12:47915650-47915750 |
| chr12 | 48127050 | 48127150 | 1100-Lng-A-T | 53  | chr12:48127050-48127150 |
| chr12 | 48331850 | 48331950 | 1004-Lng-A-T | 82  | chr12:48331850-48331950 |
| chr12 | 48333550 | 48333650 | 1004-Lng-A-T | 55  | chr12:48333550-48333650 |
| chr12 | 48482350 | 48482450 | 1065-Lng-B-T | 58  | chr12:48482350-48482450 |

**Table S2: SB Insertion regions**

|       |          |          |              |     |                         |
|-------|----------|----------|--------------|-----|-------------------------|
| chr12 | 48599050 | 48599150 | 901-Lng-A-T  | 96  | chr12:48599050-48599150 |
| chr12 | 48667150 | 48667250 | 1065-Lng-C-T | 107 | chr12:48667150-48667250 |
| chr12 | 48767250 | 48767350 | 1004-Lng-A-T | 142 | chr12:48767250-48767350 |
| chr12 | 48837150 | 48837250 | 1065-Lng-B-T | 39  | chr12:48837150-48837250 |
| chr12 | 48869750 | 48869850 | 1065-Lng-B-T | 61  | chr12:48869750-48869850 |
| chr12 | 48910650 | 48910750 | 1004-Lng-A-T | 87  | chr12:48910650-48910750 |
| chr12 | 48914950 | 48915050 | 1004-Lng-A-T | 119 | chr12:48914950-48915050 |
| chr12 | 48920850 | 48920950 | 901-Lng-B-T  | 72  | chr12:48920850-48920950 |
| chr12 | 49047850 | 49047950 | 1065-Lng-B-T | 47  | chr12:49047850-49047950 |
| chr12 | 49116050 | 49116150 | 1100-Lng-A-T | 113 | chr12:49116050-49116150 |
| chr12 | 49159150 | 49159250 | 1065-Lng-C-T | 94  | chr12:49159150-49159250 |
| chr12 | 49165050 | 49165150 | 1065-Lng-A-T | 94  | chr12:49165050-49165150 |
| chr12 | 49296050 | 49296150 | 1004-Lng-A-T | 74  | chr12:49296050-49296150 |
| chr12 | 49511450 | 49511550 | 1065-Lng-B-T | 53  | chr12:49511450-49511550 |
| chr12 | 49519850 | 49519950 | 1065-Lng-B-T | 78  | chr12:49519850-49519950 |
| chr12 | 49612550 | 49612650 | 901-Lng-D-T  | 43  | chr12:49612550-49612650 |
| chr12 | 49736750 | 49736850 | 1188-Lng-A-T | 40  | chr12:49736750-49736850 |
| chr12 | 49749450 | 49749550 | 901-Lng-C-T  | 47  | chr12:49749450-49749550 |
| chr12 | 49829950 | 49830050 | 1004-Lng-A-T | 75  | chr12:49829950-49830050 |
| chr12 | 49838750 | 49838850 | 1065-Lng-A-T | 229 | chr12:49838750-49838850 |
| chr12 | 49856150 | 49856250 | 1065-Lng-A-T | 46  | chr12:49856150-49856250 |
| chr12 | 49880050 | 49880150 | 1188-Lng-A-T | 44  | chr12:49880050-49880150 |
| chr12 | 49956750 | 49956850 | 1223-Lng-B-T | 35  | chr12:49956750-49956850 |
| chr12 | 50006950 | 50007050 | 1152-Lng-A-T | 36  | chr12:50006950-50007050 |
| chr12 | 50036450 | 50036550 | 1188-Lng-A-T | 48  | chr12:50036450-50036550 |
| chr12 | 50062850 | 50062950 | 1274-Lng-A-T | 109 | chr12:50062850-50062950 |
| chr12 | 50084250 | 50084350 | 901-Lng-C-T  | 60  | chr12:50084250-50084350 |
| chr12 | 50439150 | 50439250 | 1065-Lng-B-T | 84  | chr12:50439150-50439250 |
| chr12 | 50579850 | 50579950 | 1065-Lng-A-T | 79  | chr12:50579850-50579950 |
| chr12 | 50938950 | 50939050 | 1274-Lng-A-T | 65  | chr12:50938950-50939050 |
| chr12 | 50988050 | 50988150 | 901-Lng-C-T  | 127 | chr12:50988050-50988150 |
| chr12 | 51023150 | 51023250 | 901-Lng-A-T  | 112 | chr12:51023150-51023250 |
| chr12 | 51064950 | 51065050 | 1100-Lng-A-T | 96  | chr12:51064950-51065050 |
| chr12 | 51322450 | 51322550 | 1065-Lng-B-T | 52  | chr12:51322450-51322550 |
| chr12 | 51340850 | 51340950 | 1004-Lng-A-T | 64  | chr12:51340850-51340950 |
| chr12 | 51447650 | 51447750 | 1223-Lng-A-T | 182 | chr12:51447650-51447750 |
| chr12 | 51447950 | 51448050 | 1065-Lng-B-T | 85  | chr12:51447950-51448050 |
| chr12 | 51520450 | 51520550 | 1223-Lng-B-T | 56  | chr12:51520450-51520550 |
| chr12 | 51583150 | 51583250 | 1090-Lng-A-T | 70  | chr12:51583150-51583250 |
| chr12 | 51651250 | 51651350 | 1223-Lng-D-T | 55  | chr12:51651250-51651350 |
| chr12 | 51882150 | 51882250 | 901-Lng-D-T  | 94  | chr12:51882150-51882250 |
| chr12 | 51918350 | 51918450 | 901-Lng-B-T  | 81  | chr12:51918350-51918450 |
| chr12 | 52283350 | 52283450 | 901-Lng-B-T  | 202 | chr12:52283350-52283450 |
| chr12 | 52317550 | 52317650 | 846-Lng-A-T  | 58  | chr12:52317550-52317650 |
| chr12 | 52376050 | 52376150 | 901-Lng-C-T  | 54  | chr12:52376050-52376150 |
| chr12 | 52485450 | 52485550 | 1167-Lng-A-T | 98  | chr12:52485450-52485550 |

**Table S2: SB Insertion regions**

|       |          |          |              |      |                         |
|-------|----------|----------|--------------|------|-------------------------|
| chr12 | 52507750 | 52507850 | 1152-Lng-A-T | 42   | chr12:52507750-52507850 |
| chr12 | 52704150 | 52704250 | 1090-Lng-A-T | 61   | chr12:52704150-52704250 |
| chr12 | 52735650 | 52735750 | 1223-Lng-B-T | 34   | chr12:52735650-52735750 |
| chr12 | 52755650 | 52755750 | 1152-Lng-A-T | 48   | chr12:52755650-52755750 |
| chr12 | 52755650 | 52755750 | 901-Lng-A-T  | 109  | chr12:52755650-52755750 |
| chr12 | 52815450 | 52815550 | 1065-Lng-C-T | 104  | chr12:52815450-52815550 |
| chr12 | 52839350 | 52839450 | 1065-Lng-C-T | 366  | chr12:52839350-52839450 |
| chr12 | 52861350 | 52861450 | 1152-Lng-A-T | 80   | chr12:52861350-52861450 |
| chr12 | 52871250 | 52871350 | 846-Lng-A-T  | 47   | chr12:52871250-52871350 |
| chr12 | 52881450 | 52881550 | 1004-Lng-A-T | 66   | chr12:52881450-52881550 |
| chr12 | 52894650 | 52894750 | 901-Lng-B-T  | 40   | chr12:52894650-52894750 |
| chr12 | 52906350 | 52906450 | 901-Lng-A-T  | 565  | chr12:52906350-52906450 |
| chr12 | 52909550 | 52909650 | 1090-Lng-A-T | 54   | chr12:52909550-52909650 |
| chr12 | 52912750 | 52912850 | 1223-Lng-C-T | 43   | chr12:52912750-52912850 |
| chr12 | 52913950 | 52914050 | 1274-Lng-A-T | 58   | chr12:52913950-52914050 |
| chr12 | 52931650 | 52931750 | 1274-Lng-A-T | 87   | chr12:52931650-52931750 |
| chr12 | 52966750 | 52966850 | 1274-Lng-A-T | 57   | chr12:52966750-52966850 |
| chr12 | 53297850 | 53297950 | 1188-Lng-A-T | 98   | chr12:53297850-53297950 |
| chr12 | 53358250 | 53358350 | 901-Lng-C-T  | 38   | chr12:53358250-53358350 |
| chr12 | 53620150 | 53620250 | 901-Lng-A-T  | 87   | chr12:53620150-53620250 |
| chr12 | 53623350 | 53623450 | 1152-Lng-A-T | 152  | chr12:53623350-53623450 |
| chr12 | 53625450 | 53625550 | 901-Lng-B-T  | 199  | chr12:53625450-53625550 |
| chr12 | 53625550 | 53625650 | 1004-Lng-A-T | 99   | chr12:53625550-53625650 |
| chr12 | 53631150 | 53631250 | 1223-Lng-A-T | 259  | chr12:53631150-53631250 |
| chr12 | 53640050 | 53640150 | 1223-Lng-B-T | 81   | chr12:53640050-53640150 |
| chr12 | 53645050 | 53645150 | 1065-Lng-C-T | 61   | chr12:53645050-53645150 |
| chr12 | 53655550 | 53655650 | 1167-Lng-A-T | 3011 | chr12:53655550-53655650 |
| chr12 | 53669050 | 53669150 | 1004-Lng-A-T | 166  | chr12:53669050-53669150 |
| chr12 | 53674050 | 53674150 | 1065-Lng-B-T | 90   | chr12:53674050-53674150 |
| chr12 | 53711750 | 53711850 | 901-Lng-A-T  | 55   | chr12:53711750-53711850 |
| chr12 | 53734050 | 53734150 | 901-Lng-B-T  | 42   | chr12:53734050-53734150 |
| chr12 | 53844750 | 53844850 | 1065-Lng-A-T | 92   | chr12:53844750-53844850 |
| chr12 | 54016350 | 54016450 | 1090-Lng-A-T | 85   | chr12:54016350-54016450 |
| chr12 | 54057750 | 54057850 | 901-Lng-B-T  | 313  | chr12:54057750-54057850 |
| chr12 | 54096250 | 54096350 | 1004-Lng-A-T | 214  | chr12:54096250-54096350 |
| chr12 | 54106350 | 54106450 | 1188-Lng-A-T | 121  | chr12:54106350-54106450 |
| chr12 | 54139650 | 54139750 | 1004-Lng-A-T | 64   | chr12:54139650-54139750 |
| chr12 | 54186150 | 54186250 | 1004-Lng-A-T | 113  | chr12:54186150-54186250 |
| chr12 | 54332550 | 54332650 | 846-Lng-A-T  | 155  | chr12:54332550-54332650 |
| chr12 | 54394750 | 54394850 | 1223-Lng-B-T | 41   | chr12:54394750-54394850 |
| chr12 | 54434850 | 54434950 | 1065-Lng-B-T | 66   | chr12:54434850-54434950 |
| chr12 | 54453650 | 54453750 | 1004-Lng-A-T | 50   | chr12:54453650-54453750 |
| chr12 | 54462050 | 54462150 | 1004-Lng-A-T | 91   | chr12:54462050-54462150 |
| chr12 | 54492450 | 54492550 | 1223-Lng-D-T | 49   | chr12:54492450-54492550 |
| chr12 | 54537350 | 54537450 | 1090-Lng-A-T | 55   | chr12:54537350-54537450 |
| chr12 | 54556250 | 54556350 | 1090-Lng-A-T | 77   | chr12:54556250-54556350 |

**Table S2: SB Insertion regions**

|       |          |          |              |     |                         |
|-------|----------|----------|--------------|-----|-------------------------|
| chr12 | 54745350 | 54745450 | 1004-Lng-A-T | 242 | chr12:54745350-54745450 |
| chr12 | 54818950 | 54819050 | 1004-Lng-A-T | 164 | chr12:54818950-54819050 |
| chr12 | 54824050 | 54824150 | 846-Lng-A-T  | 84  | chr12:54824050-54824150 |
| chr12 | 54843350 | 54843450 | 1065-Lng-A-T | 338 | chr12:54843350-54843450 |
| chr12 | 55067950 | 55068050 | 1223-Lng-B-T | 43  | chr12:55067950-55068050 |
| chr12 | 55093850 | 55093950 | 1004-Lng-A-T | 67  | chr12:55093850-55093950 |
| chr12 | 55138750 | 55138850 | 901-Lng-A-T  | 63  | chr12:55138750-55138850 |
| chr12 | 55332450 | 55332550 | 1004-Lng-A-T | 82  | chr12:55332450-55332550 |
| chr12 | 55681750 | 55681850 | 846-Lng-A-T  | 939 | chr12:55681750-55681850 |
| chr12 | 55734850 | 55734950 | 846-Lng-A-T  | 66  | chr12:55734850-55734950 |
| chr12 | 55755950 | 55756050 | 901-Lng-A-T  | 57  | chr12:55755950-55756050 |
| chr12 | 55886750 | 55886850 | 1223-Lng-A-T | 98  | chr12:55886750-55886850 |
| chr12 | 56026850 | 56026950 | 1223-Lng-A-T | 83  | chr12:56026850-56026950 |
| chr12 | 56172150 | 56172250 | 846-Lng-A-T  | 141 | chr12:56172150-56172250 |
| chr12 | 56183550 | 56183650 | 1152-Lng-A-T | 63  | chr12:56183550-56183650 |
| chr12 | 56523950 | 56524050 | 901-Lng-C-T  | 52  | chr12:56523950-56524050 |
| chr12 | 56720950 | 56721050 | 1167-Lng-A-T | 55  | chr12:56720950-56721050 |
| chr12 | 56767550 | 56767650 | 1004-Lng-A-T | 245 | chr12:56767550-56767650 |
| chr12 | 56810050 | 56810150 | 1065-Lng-A-T | 98  | chr12:56810050-56810150 |
| chr12 | 56858650 | 56858750 | 1223-Lng-C-T | 43  | chr12:56858650-56858750 |
| chr12 | 56913950 | 56914050 | 1004-Lng-A-T | 110 | chr12:56913950-56914050 |
| chr12 | 56948550 | 56948650 | 1065-Lng-A-T | 87  | chr12:56948550-56948650 |
| chr12 | 57408150 | 57408250 | 901-Lng-C-T  | 145 | chr12:57408150-57408250 |
| chr12 | 57422550 | 57422650 | 901-Lng-B-T  | 116 | chr12:57422550-57422650 |
| chr12 | 57457150 | 57457250 | 1274-Lng-A-T | 70  | chr12:57457150-57457250 |
| chr12 | 57510750 | 57510850 | 1004-Lng-A-T | 67  | chr12:57510750-57510850 |
| chr12 | 57522250 | 57522350 | 1065-Lng-C-T | 73  | chr12:57522250-57522350 |
| chr12 | 57535050 | 57535150 | 1004-Lng-A-T | 55  | chr12:57535050-57535150 |
| chr12 | 57601850 | 57601950 | 1065-Lng-A-T | 43  | chr12:57601850-57601950 |
| chr12 | 57616750 | 57616850 | 1274-Lng-A-T | 53  | chr12:57616750-57616850 |
| chr12 | 58011950 | 58012050 | 901-Lng-B-T  | 95  | chr12:58011950-58012050 |
| chr12 | 58065550 | 58065650 | 1065-Lng-A-T | 35  | chr12:58065550-58065650 |
| chr12 | 58156850 | 58156950 | 901-Lng-C-T  | 291 | chr12:58156850-58156950 |
| chr12 | 58333850 | 58333950 | 1065-Lng-A-T | 36  | chr12:58333850-58333950 |
| chr12 | 58344350 | 58344450 | 1065-Lng-C-T | 191 | chr12:58344350-58344450 |
| chr12 | 58378650 | 58378750 | 1065-Lng-A-T | 175 | chr12:58378650-58378750 |
| chr12 | 58484050 | 58484150 | 1004-Lng-A-T | 349 | chr12:58484050-58484150 |
| chr12 | 58517150 | 58517250 | 1188-Lng-A-T | 382 | chr12:58517150-58517250 |
| chr12 | 58553650 | 58553750 | 1188-Lng-A-T | 127 | chr12:58553650-58553750 |
| chr12 | 58589950 | 58590050 | 1065-Lng-A-T | 60  | chr12:58589950-58590050 |
| chr12 | 58708350 | 58708450 | 1004-Lng-A-T | 57  | chr12:58708350-58708450 |
| chr12 | 58750650 | 58750750 | 1274-Lng-A-T | 71  | chr12:58750650-58750750 |
| chr12 | 58774450 | 58774550 | 1065-Lng-A-T | 65  | chr12:58774450-58774550 |
| chr12 | 58929850 | 58929950 | 1090-Lng-A-T | 918 | chr12:58929850-58929950 |
| chr12 | 58971650 | 58971750 | 1065-Lng-A-T | 58  | chr12:58971650-58971750 |
| chr12 | 58998150 | 58998250 | 1274-Lng-A-T | 57  | chr12:58998150-58998250 |

**Table S2: SB Insertion regions**

|       |          |          |              |      |                         |
|-------|----------|----------|--------------|------|-------------------------|
| chr12 | 59033550 | 59033650 | 901-Lng-B-T  | 64   | chr12:59033550-59033650 |
| chr12 | 59076450 | 59076550 | 1072-Lng-A-T | 51   | chr12:59076450-59076550 |
| chr12 | 59091350 | 59091450 | 1152-Lng-A-T | 99   | chr12:59091350-59091450 |
| chr12 | 59114250 | 59114350 | 1152-Lng-A-T | 75   | chr12:59114250-59114350 |
| chr12 | 59183550 | 59183650 | 846-Lng-A-T  | 72   | chr12:59183550-59183650 |
| chr12 | 59471550 | 59471650 | 901-Lng-C-T  | 57   | chr12:59471550-59471650 |
| chr12 | 59477350 | 59477450 | 901-Lng-C-T  | 65   | chr12:59477350-59477450 |
| chr12 | 59478750 | 59478850 | 901-Lng-B-T  | 78   | chr12:59478750-59478850 |
| chr12 | 59601350 | 59601450 | 901-Lng-A-T  | 339  | chr12:59601350-59601450 |
| chr12 | 59711250 | 59711350 | 1152-Lng-A-T | 82   | chr12:59711250-59711350 |
| chr12 | 60058550 | 60058650 | 1152-Lng-A-T | 89   | chr12:60058550-60058650 |
| chr12 | 60072950 | 60073050 | 1090-Lng-A-T | 82   | chr12:60072950-60073050 |
| chr12 | 60108650 | 60108750 | 1004-Lng-A-T | 82   | chr12:60108650-60108750 |
| chr12 | 60112150 | 60112250 | 1004-Lng-A-T | 106  | chr12:60112150-60112250 |
| chr12 | 60155650 | 60155750 | 1004-Lng-A-T | 72   | chr12:60155650-60155750 |
| chr12 | 60159750 | 60159850 | 1274-Lng-A-T | 50   | chr12:60159750-60159850 |
| chr12 | 60276150 | 60276250 | 846-Lng-A-T  | 150  | chr12:60276150-60276250 |
| chr12 | 60276650 | 60276750 | 1152-Lng-A-T | 72   | chr12:60276650-60276750 |
| chr12 | 60282950 | 60283050 | 1223-Lng-A-T | 69   | chr12:60282950-60283050 |
| chr12 | 60442350 | 60442450 | 901-Lng-C-T  | 57   | chr12:60442350-60442450 |
| chr12 | 60516550 | 60516650 | 1223-Lng-B-T | 51   | chr12:60516550-60516650 |
| chr12 | 60567850 | 60567950 | 846-Lng-A-T  | 105  | chr12:60567850-60567950 |
| chr12 | 60742750 | 60742850 | 1188-Lng-A-T | 36   | chr12:60742750-60742850 |
| chr12 | 60985050 | 60985150 | 1223-Lng-B-T | 55   | chr12:60985050-60985150 |
| chr12 | 61185950 | 61186050 | 1004-Lng-A-T | 57   | chr12:61185950-61186050 |
| chr12 | 61190150 | 61190250 | 1090-Lng-B-T | 119  | chr12:61190150-61190250 |
| chr12 | 61201550 | 61201650 | 846-Lng-A-T  | 94   | chr12:61201550-61201650 |
| chr12 | 61208650 | 61208750 | 1065-Lng-A-T | 61   | chr12:61208650-61208750 |
| chr12 | 61250050 | 61250150 | 846-Lng-A-T  | 54   | chr12:61250050-61250150 |
| chr12 | 61366750 | 61366850 | 1223-Lng-B-T | 83   | chr12:61366750-61366850 |
| chr12 | 61481450 | 61481550 | 1065-Lng-C-T | 2213 | chr12:61481450-61481550 |
| chr12 | 61513750 | 61513850 | 846-Lng-A-T  | 1340 | chr12:61513750-61513850 |
| chr12 | 61562650 | 61562750 | 1065-Lng-B-T | 88   | chr12:61562650-61562750 |
| chr12 | 61593350 | 61593450 | 1223-Lng-B-T | 35   | chr12:61593350-61593450 |
| chr12 | 61789250 | 61789350 | 901-Lng-A-T  | 465  | chr12:61789250-61789350 |
| chr12 | 61799450 | 61799550 | 1004-Lng-A-T | 84   | chr12:61799450-61799550 |
| chr12 | 61861650 | 61861750 | 1004-Lng-A-T | 67   | chr12:61861650-61861750 |
| chr12 | 61901150 | 61901250 | 1152-Lng-A-T | 174  | chr12:61901150-61901250 |
| chr12 | 61922550 | 61922650 | 1065-Lng-B-T | 74   | chr12:61922550-61922650 |
| chr12 | 62029050 | 62029150 | 1004-Lng-A-T | 51   | chr12:62029050-62029150 |
| chr12 | 62123750 | 62123850 | 1065-Lng-B-T | 63   | chr12:62123750-62123850 |
| chr12 | 62124550 | 62124650 | 1152-Lng-A-T | 166  | chr12:62124550-62124650 |
| chr12 | 62128450 | 62128550 | 901-Lng-A-T  | 53   | chr12:62128450-62128550 |
| chr12 | 62358750 | 62358850 | 901-Lng-B-T  | 124  | chr12:62358750-62358850 |
| chr12 | 62455750 | 62455850 | 846-Lng-A-T  | 910  | chr12:62455750-62455850 |
| chr12 | 62519850 | 62519950 | 1090-Lng-B-T | 109  | chr12:62519850-62519950 |

**Table S2: SB Insertion regions**

|       |          |          |              |      |                         |
|-------|----------|----------|--------------|------|-------------------------|
| chr12 | 62545950 | 62546050 | 1188-Lng-A-T | 104  | chr12:62545950-62546050 |
| chr12 | 62575650 | 62575750 | 1274-Lng-A-T | 138  | chr12:62575650-62575750 |
| chr12 | 62577450 | 62577550 | 901-Lng-C-T  | 160  | chr12:62577450-62577550 |
| chr12 | 62676350 | 62676450 | 1188-Lng-A-T | 37   | chr12:62676350-62676450 |
| chr12 | 62677650 | 62677750 | 846-Lng-A-T  | 145  | chr12:62677650-62677750 |
| chr12 | 62757150 | 62757250 | 1223-Lng-C-T | 45   | chr12:62757150-62757250 |
| chr12 | 62778850 | 62778950 | 1223-Lng-A-T | 59   | chr12:62778850-62778950 |
| chr12 | 62826050 | 62826150 | 1065-Lng-A-T | 74   | chr12:62826050-62826150 |
| chr12 | 62877950 | 62878050 | 1090-Lng-A-T | 53   | chr12:62877950-62878050 |
| chr12 | 62897650 | 62897750 | 1100-Lng-A-T | 97   | chr12:62897650-62897750 |
| chr12 | 62910550 | 62910650 | 1065-Lng-C-T | 68   | chr12:62910550-62910650 |
| chr12 | 62982450 | 62982550 | 1167-Lng-A-T | 52   | chr12:62982450-62982550 |
| chr12 | 63394150 | 63394250 | 1223-Lng-B-T | 59   | chr12:63394150-63394250 |
| chr12 | 63430050 | 63430150 | 901-Lng-A-T  | 632  | chr12:63430050-63430150 |
| chr12 | 63509150 | 63509250 | 1065-Lng-A-T | 43   | chr12:63509150-63509250 |
| chr12 | 63693250 | 63693350 | 1100-Lng-A-T | 73   | chr12:63693250-63693350 |
| chr12 | 63702550 | 63702650 | 1274-Lng-A-T | 95   | chr12:63702550-63702650 |
| chr12 | 63858150 | 63858250 | 1223-Lng-C-T | 52   | chr12:63858150-63858250 |
| chr12 | 63879950 | 63880050 | 901-Lng-C-T  | 407  | chr12:63879950-63880050 |
| chr12 | 63893950 | 63894050 | 901-Lng-A-T  | 164  | chr12:63893950-63894050 |
| chr12 | 63977350 | 63977450 | 1072-Lng-A-T | 56   | chr12:63977350-63977450 |
| chr12 | 64052250 | 64052350 | 1004-Lng-A-T | 58   | chr12:64052250-64052350 |
| chr12 | 64243950 | 64244050 | 1072-Lng-A-T | 73   | chr12:64243950-64244050 |
| chr12 | 64329550 | 64329650 | 901-Lng-B-T  | 169  | chr12:64329550-64329650 |
| chr12 | 64350850 | 64350950 | 1004-Lng-A-T | 60   | chr12:64350850-64350950 |
| chr12 | 64407350 | 64407450 | 1065-Lng-B-T | 60   | chr12:64407350-64407450 |
| chr12 | 64975950 | 64976050 | 846-Lng-A-T  | 181  | chr12:64975950-64976050 |
| chr12 | 65097450 | 65097550 | 1223-Lng-A-T | 114  | chr12:65097450-65097550 |
| chr12 | 65128150 | 65128250 | 1188-Lng-A-T | 49   | chr12:65128150-65128250 |
| chr12 | 65204250 | 65204350 | 1004-Lng-A-T | 84   | chr12:65204250-65204350 |
| chr12 | 65373150 | 65373250 | 1223-Lng-B-T | 66   | chr12:65373150-65373250 |
| chr12 | 65383350 | 65383450 | 1004-Lng-A-T | 95   | chr12:65383350-65383450 |
| chr12 | 65462850 | 65462950 | 1004-Lng-A-T | 67   | chr12:65462850-65462950 |
| chr12 | 65467650 | 65467750 | 1065-Lng-B-T | 43   | chr12:65467650-65467750 |
| chr12 | 65467850 | 65467950 | 846-Lng-A-T  | 186  | chr12:65467850-65467950 |
| chr12 | 65478650 | 65478750 | 1223-Lng-B-T | 35   | chr12:65478650-65478750 |
| chr12 | 65589850 | 65589950 | 901-Lng-C-T  | 29   | chr12:65589850-65589950 |
| chr12 | 65696450 | 65696550 | 1100-Lng-A-T | 94   | chr12:65696450-65696550 |
| chr12 | 65743150 | 65743250 | 1004-Lng-A-T | 78   | chr12:65743150-65743250 |
| chr12 | 65951150 | 65951250 | 901-Lng-C-T  | 92   | chr12:65951150-65951250 |
| chr12 | 66015350 | 66015450 | 1065-Lng-A-T | 94   | chr12:66015350-66015450 |
| chr12 | 66069150 | 66069250 | 1188-Lng-A-T | 40   | chr12:66069150-66069250 |
| chr12 | 66071550 | 66071650 | 1100-Lng-B-T | 631  | chr12:66071550-66071650 |
| chr12 | 66080950 | 66081050 | 1223-Lng-B-T | 144  | chr12:66080950-66081050 |
| chr12 | 66085950 | 66086050 | 901-Lng-A-T  | 82   | chr12:66085950-66086050 |
| chr12 | 66099650 | 66099750 | 1065-Lng-C-T | 1290 | chr12:66099650-66099750 |

**Table S2: SB Insertion regions**

|       |          |          |              |      |                         |
|-------|----------|----------|--------------|------|-------------------------|
| chr12 | 66124950 | 66125050 | 1167-Lng-A-T | 63   | chr12:66124950-66125050 |
| chr12 | 66139950 | 66140050 | 1274-Lng-A-T | 56   | chr12:66139950-66140050 |
| chr12 | 66145850 | 66145950 | 1151-Lng-A-T | 60   | chr12:66145850-66145950 |
| chr12 | 66228450 | 66228550 | 846-Lng-A-T  | 127  | chr12:66228450-66228550 |
| chr12 | 66631350 | 66631450 | 846-Lng-A-T  | 116  | chr12:66631350-66631450 |
| chr12 | 66648750 | 66648850 | 1274-Lng-A-T | 83   | chr12:66648750-66648850 |
| chr12 | 66778650 | 66778750 | 901-Lng-A-T  | 63   | chr12:66778650-66778750 |
| chr12 | 66823350 | 66823450 | 1004-Lng-A-T | 201  | chr12:66823350-66823450 |
| chr12 | 67032250 | 67032350 | 1223-Lng-A-T | 308  | chr12:67032250-67032350 |
| chr12 | 67131450 | 67131550 | 1065-Lng-C-T | 2010 | chr12:67131450-67131550 |
| chr12 | 67386050 | 67386150 | 901-Lng-C-T  | 67   | chr12:67386050-67386150 |
| chr12 | 67744950 | 67745050 | 1065-Lng-A-T | 42   | chr12:67744950-67745050 |
| chr12 | 67788050 | 67788150 | 901-Lng-A-T  | 95   | chr12:67788050-67788150 |
| chr12 | 67850050 | 67850150 | 1072-Lng-A-T | 49   | chr12:67850050-67850150 |
| chr12 | 67900050 | 67900150 | 1152-Lng-A-T | 41   | chr12:67900050-67900150 |
| chr12 | 68160250 | 68160350 | 901-Lng-D-T  | 265  | chr12:68160250-68160350 |
| chr12 | 68243350 | 68243450 | 1274-Lng-A-T | 97   | chr12:68243350-68243450 |
| chr12 | 68410250 | 68410350 | 901-Lng-B-T  | 66   | chr12:68410250-68410350 |
| chr12 | 68554950 | 68555050 | 901-Lng-A-T  | 212  | chr12:68554950-68555050 |
| chr12 | 68690150 | 68690250 | 1065-Lng-A-T | 126  | chr12:68690150-68690250 |
| chr12 | 68722950 | 68723050 | 1065-Lng-B-T | 70   | chr12:68722950-68723050 |
| chr12 | 69557450 | 69557550 | 901-Lng-D-T  | 708  | chr12:69557450-69557550 |
| chr12 | 69745150 | 69745250 | 1065-Lng-A-T | 59   | chr12:69745150-69745250 |
| chr12 | 69794850 | 69794950 | 1065-Lng-C-T | 100  | chr12:69794850-69794950 |
| chr12 | 69869550 | 69869650 | 1004-Lng-A-T | 51   | chr12:69869550-69869650 |
| chr12 | 70301650 | 70301750 | 1065-Lng-B-T | 49   | chr12:70301650-70301750 |
| chr12 | 70394250 | 70394350 | 901-Lng-A-T  | 59   | chr12:70394250-70394350 |
| chr12 | 70409050 | 70409150 | 1151-Lng-A-T | 295  | chr12:70409050-70409150 |
| chr12 | 70416350 | 70416450 | 1152-Lng-A-T | 164  | chr12:70416350-70416450 |
| chr12 | 70526350 | 70526450 | 1100-Lng-B-T | 83   | chr12:70526350-70526450 |
| chr12 | 70544950 | 70545050 | 1167-Lng-A-T | 55   | chr12:70544950-70545050 |
| chr12 | 70680850 | 70680950 | 1152-Lng-A-T | 64   | chr12:70680850-70680950 |
| chr12 | 70724250 | 70724350 | 1065-Lng-A-T | 82   | chr12:70724250-70724350 |
| chr12 | 70807150 | 70807250 | 1223-Lng-C-T | 47   | chr12:70807150-70807250 |
| chr12 | 70850750 | 70850850 | 1274-Lng-A-T | 57   | chr12:70850750-70850850 |
| chr12 | 70942250 | 70942350 | 1004-Lng-A-T | 521  | chr12:70942250-70942350 |
| chr12 | 70973850 | 70973950 | 1223-Lng-B-T | 115  | chr12:70973850-70973950 |
| chr12 | 71063550 | 71063650 | 1223-Lng-D-T | 41   | chr12:71063550-71063650 |
| chr12 | 71086350 | 71086450 | 1004-Lng-A-T | 78   | chr12:71086350-71086450 |
| chr12 | 71431850 | 71431950 | 1152-Lng-A-T | 134  | chr12:71431850-71431950 |
| chr12 | 71720350 | 71720450 | 1004-Lng-A-T | 244  | chr12:71720350-71720450 |
| chr12 | 71786850 | 71786950 | 1274-Lng-A-T | 128  | chr12:71786850-71786950 |
| chr12 | 71900350 | 71900450 | 1223-Lng-D-T | 53   | chr12:71900350-71900450 |
| chr12 | 71914950 | 71915050 | 1151-Lng-A-T | 68   | chr12:71914950-71915050 |
| chr12 | 71951250 | 71951350 | 1274-Lng-A-T | 99   | chr12:71951250-71951350 |
| chr12 | 71966450 | 71966550 | 901-Lng-B-T  | 150  | chr12:71966450-71966550 |

**Table S2: SB Insertion regions**

|       |          |          |              |     |                         |
|-------|----------|----------|--------------|-----|-------------------------|
| chr12 | 72010950 | 72011050 | 1090-Lng-A-T | 71  | chr12:72010950-72011050 |
| chr12 | 72047150 | 72047250 | 1065-Lng-C-T | 62  | chr12:72047150-72047250 |
| chr12 | 72080950 | 72081050 | 1065-Lng-B-T | 51  | chr12:72080950-72081050 |
| chr12 | 72088850 | 72088950 | 1090-Lng-A-T | 486 | chr12:72088850-72088950 |
| chr12 | 72090350 | 72090450 | 901-Lng-A-T  | 96  | chr12:72090350-72090450 |
| chr12 | 72111150 | 72111250 | 901-Lng-A-T  | 70  | chr12:72111150-72111250 |
| chr12 | 72112150 | 72112250 | 1274-Lng-A-T | 87  | chr12:72112150-72112250 |
| chr12 | 72146350 | 72146450 | 1065-Lng-A-T | 80  | chr12:72146350-72146450 |
| chr12 | 72159450 | 72159550 | 1152-Lng-A-T | 47  | chr12:72159450-72159550 |
| chr12 | 72354750 | 72354850 | 1090-Lng-A-T | 866 | chr12:72354750-72354850 |
| chr12 | 72936050 | 72936150 | 1100-Lng-A-T | 150 | chr12:72936050-72936150 |
| chr12 | 72956150 | 72956250 | 1274-Lng-A-T | 106 | chr12:72956150-72956250 |
| chr12 | 72973750 | 72973850 | 1065-Lng-A-T | 107 | chr12:72973750-72973850 |
| chr12 | 72976750 | 72976850 | 1167-Lng-A-T | 81  | chr12:72976750-72976850 |
| chr12 | 73005750 | 73005850 | 1274-Lng-A-T | 79  | chr12:73005750-73005850 |
| chr12 | 73012550 | 73012650 | 1188-Lng-A-T | 201 | chr12:73012550-73012650 |
| chr12 | 73016150 | 73016250 | 1274-Lng-A-T | 50  | chr12:73016150-73016250 |
| chr12 | 73022050 | 73022150 | 1274-Lng-A-T | 59  | chr12:73022050-73022150 |
| chr12 | 73059750 | 73059850 | 1274-Lng-A-T | 280 | chr12:73059750-73059850 |
| chr12 | 73084150 | 73084250 | 901-Lng-C-T  | 52  | chr12:73084150-73084250 |
| chr12 | 73317750 | 73317850 | 1223-Lng-B-T | 38  | chr12:73317750-73317850 |
| chr12 | 73636850 | 73636950 | 1004-Lng-A-T | 52  | chr12:73636850-73636950 |
| chr12 | 73771850 | 73771950 | 1004-Lng-A-T | 84  | chr12:73771850-73771950 |
| chr12 | 73839650 | 73839750 | 901-Lng-B-T  | 146 | chr12:73839650-73839750 |
| chr12 | 73866350 | 73866450 | 1274-Lng-A-T | 251 | chr12:73866350-73866450 |
| chr12 | 73867350 | 73867450 | 1152-Lng-A-T | 88  | chr12:73867350-73867450 |
| chr12 | 74193150 | 74193250 | 1065-Lng-B-T | 48  | chr12:74193150-74193250 |
| chr12 | 74235850 | 74235950 | 901-Lng-B-T  | 94  | chr12:74235850-74235950 |
| chr12 | 74322850 | 74322950 | 901-Lng-A-T  | 67  | chr12:74322850-74322950 |
| chr12 | 74380750 | 74380850 | 1223-Lng-B-T | 42  | chr12:74380750-74380850 |
| chr12 | 74817850 | 74817950 | 1065-Lng-C-T | 96  | chr12:74817850-74817950 |
| chr12 | 74843550 | 74843650 | 901-Lng-A-T  | 104 | chr12:74843550-74843650 |
| chr12 | 74912850 | 74912950 | 1274-Lng-A-T | 305 | chr12:74912850-74912950 |
| chr12 | 74976850 | 74976950 | 1188-Lng-A-T | 306 | chr12:74976850-74976950 |
| chr12 | 75011850 | 75011950 | 1090-Lng-B-T | 516 | chr12:75011850-75011950 |
| chr12 | 75021950 | 75022050 | 1274-Lng-A-T | 204 | chr12:75021950-75022050 |
| chr12 | 75024350 | 75024450 | 1223-Lng-B-T | 38  | chr12:75024350-75024450 |
| chr12 | 75032150 | 75032250 | 1065-Lng-B-T | 57  | chr12:75032150-75032250 |
| chr12 | 75047350 | 75047450 | 1274-Lng-A-T | 59  | chr12:75047350-75047450 |
| chr12 | 75377450 | 75377550 | 1223-Lng-A-T | 200 | chr12:75377450-75377550 |
| chr12 | 75425150 | 75425250 | 1274-Lng-A-T | 57  | chr12:75425150-75425250 |
| chr12 | 75452250 | 75452350 | 1100-Lng-A-T | 91  | chr12:75452250-75452350 |
| chr12 | 75549550 | 75549650 | 1223-Lng-D-T | 66  | chr12:75549550-75549650 |
| chr12 | 75617250 | 75617350 | 1004-Lng-A-T | 81  | chr12:75617250-75617350 |
| chr12 | 75694750 | 75694850 | 901-Lng-A-T  | 124 | chr12:75694750-75694850 |
| chr12 | 75734550 | 75734650 | 1065-Lng-C-T | 91  | chr12:75734550-75734650 |



**Table S2: SB Insertion regions**

|       |          |          |              |     |                         |
|-------|----------|----------|--------------|-----|-------------------------|
| chr12 | 75810850 | 75810950 | 1152-Lng-A-T | 42  | chr12:75810850-75810950 |
| chr12 | 75823650 | 75823750 | 901-Lng-D-T  | 47  | chr12:75823650-75823750 |
| chr12 | 75905450 | 75905550 | 1065-Lng-B-T | 70  | chr12:75905450-75905550 |
| chr12 | 76069550 | 76069650 | 901-Lng-A-T  | 118 | chr12:76069550-76069650 |
| chr12 | 76078050 | 76078150 | 1090-Lng-A-T | 129 | chr12:76078050-76078150 |
| chr12 | 76164450 | 76164550 | 901-Lng-A-T  | 107 | chr12:76164450-76164550 |
| chr12 | 76261250 | 76261350 | 1152-Lng-A-T | 111 | chr12:76261250-76261350 |
| chr12 | 76410050 | 76410150 | 1072-Lng-A-T | 167 | chr12:76410050-76410150 |
| chr12 | 76549750 | 76549850 | 901-Lng-B-T  | 150 | chr12:76549750-76549850 |
| chr12 | 76564450 | 76564550 | 1274-Lng-A-T | 73  | chr12:76564450-76564550 |
| chr12 | 76588350 | 76588450 | 1188-Lng-A-T | 65  | chr12:76588350-76588450 |
| chr12 | 76629950 | 76630050 | 1223-Lng-C-T | 81  | chr12:76629950-76630050 |
| chr12 | 76634950 | 76635050 | 1152-Lng-A-T | 54  | chr12:76634950-76635050 |
| chr12 | 76642150 | 76642250 | 901-Lng-A-T  | 72  | chr12:76642150-76642250 |
| chr12 | 76836050 | 76836150 | 1274-Lng-A-T | 143 | chr12:76836050-76836150 |
| chr12 | 76968450 | 76968550 | 1065-Lng-C-T | 86  | chr12:76968450-76968550 |
| chr12 | 76976650 | 76976750 | 1152-Lng-A-T | 37  | chr12:76976650-76976750 |
| chr12 | 77075050 | 77075150 | 901-Lng-D-T  | 36  | chr12:77075050-77075150 |
| chr12 | 77318350 | 77318450 | 1004-Lng-A-T | 67  | chr12:77318350-77318450 |
| chr12 | 77400950 | 77401050 | 1072-Lng-A-T | 56  | chr12:77400950-77401050 |
| chr12 | 77400950 | 77401050 | 1223-Lng-A-T | 166 | chr12:77400950-77401050 |
| chr12 | 77426650 | 77426750 | 1274-Lng-A-T | 179 | chr12:77426650-77426750 |
| chr12 | 77436550 | 77436650 | 1151-Lng-A-T | 148 | chr12:77436550-77436650 |
| chr12 | 77442950 | 77443050 | 1223-Lng-C-T | 67  | chr12:77442950-77443050 |
| chr12 | 77509550 | 77509650 | 1072-Lng-A-T | 133 | chr12:77509550-77509650 |
| chr12 | 77562950 | 77563050 | 1065-Lng-C-T | 86  | chr12:77562950-77563050 |
| chr12 | 77686350 | 77686450 | 1072-Lng-A-T | 85  | chr12:77686350-77686450 |
| chr12 | 77799650 | 77799750 | 1090-Lng-B-T | 385 | chr12:77799650-77799750 |
| chr12 | 77873050 | 77873150 | 1090-Lng-A-T | 92  | chr12:77873050-77873150 |
| chr12 | 77911250 | 77911350 | 1065-Lng-A-T | 75  | chr12:77911250-77911350 |
| chr12 | 77915950 | 77916050 | 901-Lng-B-T  | 47  | chr12:77915950-77916050 |
| chr12 | 77922050 | 77922150 | 1188-Lng-A-T | 244 | chr12:77922050-77922150 |
| chr12 | 78052950 | 78053050 | 1223-Lng-D-T | 64  | chr12:78052950-78053050 |
| chr12 | 78171150 | 78171250 | 901-Lng-C-T  | 244 | chr12:78171150-78171250 |
| chr12 | 78253650 | 78253750 | 1065-Lng-B-T | 44  | chr12:78253650-78253750 |
| chr12 | 78354550 | 78354650 | 1065-Lng-C-T | 69  | chr12:78354550-78354650 |
| chr12 | 78357950 | 78358050 | 1065-Lng-A-T | 59  | chr12:78357950-78358050 |
| chr12 | 78449950 | 78450050 | 1072-Lng-A-T | 64  | chr12:78449950-78450050 |
| chr12 | 78450050 | 78450150 | 1100-Lng-A-T | 61  | chr12:78450050-78450150 |
| chr12 | 78492050 | 78492150 | 901-Lng-B-T  | 90  | chr12:78492050-78492150 |
| chr12 | 78733650 | 78733750 | 901-Lng-B-T  | 252 | chr12:78733650-78733750 |
| chr12 | 79134550 | 79134650 | 901-Lng-C-T  | 165 | chr12:79134550-79134650 |
| chr12 | 79364150 | 79364250 | 1151-Lng-A-T | 91  | chr12:79364150-79364250 |
| chr12 | 79364750 | 79364850 | 1151-Lng-A-T | 71  | chr12:79364750-79364850 |
| chr12 | 79427750 | 79427850 | 1223-Lng-A-T | 66  | chr12:79427750-79427850 |
| chr12 | 79439650 | 79439750 | 1274-Lng-A-T | 80  | chr12:79439650-79439750 |

**Table S2: SB Insertion regions**

|       |          |          |              |      |                         |
|-------|----------|----------|--------------|------|-------------------------|
| chr12 | 79451150 | 79451250 | 1223-Lng-A-T | 112  | chr12:79451150-79451250 |
| chr12 | 79500550 | 79500650 | 1152-Lng-A-T | 72   | chr12:79500550-79500650 |
| chr12 | 79504350 | 79504450 | 1004-Lng-A-T | 94   | chr12:79504350-79504450 |
| chr12 | 79603250 | 79603350 | 1100-Lng-A-T | 146  | chr12:79603250-79603350 |
| chr12 | 79613850 | 79613950 | 1090-Lng-A-T | 45   | chr12:79613850-79613950 |
| chr12 | 79632850 | 79632950 | 1223-Lng-B-T | 34   | chr12:79632850-79632950 |
| chr12 | 79717750 | 79717850 | 1065-Lng-A-T | 521  | chr12:79717750-79717850 |
| chr12 | 79757950 | 79758050 | 901-Lng-A-T  | 83   | chr12:79757950-79758050 |
| chr12 | 79816650 | 79816750 | 901-Lng-D-T  | 62   | chr12:79816650-79816750 |
| chr12 | 79852450 | 79852550 | 901-Lng-C-T  | 32   | chr12:79852450-79852550 |
| chr12 | 79859350 | 79859450 | 1274-Lng-A-T | 78   | chr12:79859350-79859450 |
| chr12 | 79871050 | 79871150 | 1274-Lng-A-T | 66   | chr12:79871050-79871150 |
| chr12 | 79887150 | 79887250 | 1223-Lng-B-T | 39   | chr12:79887150-79887250 |
| chr12 | 79894650 | 79894750 | 1167-Lng-A-T | 88   | chr12:79894650-79894750 |
| chr12 | 79904650 | 79904750 | 1100-Lng-B-T | 172  | chr12:79904650-79904750 |
| chr12 | 79926350 | 79926450 | 1072-Lng-A-T | 51   | chr12:79926350-79926450 |
| chr12 | 79928950 | 79929050 | 1188-Lng-A-T | 35   | chr12:79928950-79929050 |
| chr12 | 79942250 | 79942350 | 1065-Lng-A-T | 878  | chr12:79942250-79942350 |
| chr12 | 79950750 | 79950850 | 1223-Lng-A-T | 126  | chr12:79950750-79950850 |
| chr12 | 79960750 | 79960850 | 1072-Lng-A-T | 71   | chr12:79960750-79960850 |
| chr12 | 80119750 | 80119850 | 901-Lng-A-T  | 59   | chr12:80119750-80119850 |
| chr12 | 80148650 | 80148750 | 1065-Lng-A-T | 75   | chr12:80148650-80148750 |
| chr12 | 80260650 | 80260750 | 1274-Lng-A-T | 50   | chr12:80260650-80260750 |
| chr12 | 80375050 | 80375150 | 1065-Lng-B-T | 51   | chr12:80375050-80375150 |
| chr12 | 80411550 | 80411650 | 1223-Lng-B-T | 142  | chr12:80411550-80411650 |
| chr12 | 80533850 | 80533950 | 1223-Lng-D-T | 47   | chr12:80533850-80533950 |
| chr12 | 80563450 | 80563550 | 1072-Lng-A-T | 227  | chr12:80563450-80563550 |
| chr12 | 80611450 | 80611550 | 1167-Lng-A-T | 88   | chr12:80611450-80611550 |
| chr12 | 80684150 | 80684250 | 901-Lng-B-T  | 106  | chr12:80684150-80684250 |
| chr12 | 80687150 | 80687250 | 1188-Lng-A-T | 107  | chr12:80687150-80687250 |
| chr12 | 80892350 | 80892450 | 1072-Lng-A-T | 52   | chr12:80892350-80892450 |
| chr12 | 80992950 | 80993050 | 901-Lng-A-T  | 63   | chr12:80992950-80993050 |
| chr12 | 81088150 | 81088250 | 1223-Lng-D-T | 41   | chr12:81088150-81088250 |
| chr12 | 81093450 | 81093550 | 1188-Lng-A-T | 58   | chr12:81093450-81093550 |
| chr12 | 81093550 | 81093650 | 1188-Lng-A-T | 2522 | chr12:81093550-81093650 |
| chr12 | 81234350 | 81234450 | 1223-Lng-B-T | 48   | chr12:81234350-81234450 |
| chr12 | 81242050 | 81242150 | 901-Lng-C-T  | 56   | chr12:81242050-81242150 |
| chr12 | 81280850 | 81280950 | 1100-Lng-A-T | 177  | chr12:81280850-81280950 |
| chr12 | 81386650 | 81386750 | 1151-Lng-A-T | 154  | chr12:81386650-81386750 |
| chr12 | 81426750 | 81426850 | 1151-Lng-A-T | 80   | chr12:81426750-81426850 |
| chr12 | 81448550 | 81448650 | 1188-Lng-A-T | 69   | chr12:81448550-81448650 |
| chr12 | 81483050 | 81483150 | 1274-Lng-A-T | 253  | chr12:81483050-81483150 |
| chr12 | 81492750 | 81492850 | 1090-Lng-A-T | 110  | chr12:81492750-81492850 |
| chr12 | 81611750 | 81611850 | 901-Lng-B-T  | 97   | chr12:81611750-81611850 |
| chr12 | 81666350 | 81666450 | 1065-Lng-B-T | 47   | chr12:81666350-81666450 |
| chr12 | 81699250 | 81699350 | 1188-Lng-A-T | 220  | chr12:81699250-81699350 |

**Table S2: SB Insertion regions**

|       |          |          |              |     |                         |
|-------|----------|----------|--------------|-----|-------------------------|
| chr12 | 81762750 | 81762850 | 1223-Lng-D-T | 174 | chr12:81762750-81762850 |
| chr12 | 81920950 | 81921050 | 1004-Lng-A-T | 78  | chr12:81920950-81921050 |
| chr12 | 81960850 | 81960950 | 1188-Lng-A-T | 137 | chr12:81960850-81960950 |
| chr12 | 81994850 | 81994950 | 1274-Lng-A-T | 59  | chr12:81994850-81994950 |
| chr12 | 82054750 | 82054850 | 1152-Lng-A-T | 81  | chr12:82054750-82054850 |
| chr12 | 82055550 | 82055650 | 1065-Lng-C-T | 81  | chr12:82055550-82055650 |
| chr12 | 82402450 | 82402550 | 901-Lng-A-T  | 93  | chr12:82402450-82402550 |
| chr12 | 82487750 | 82487850 | 1072-Lng-A-T | 72  | chr12:82487750-82487850 |
| chr12 | 82498350 | 82498450 | 1223-Lng-B-T | 35  | chr12:82498350-82498450 |
| chr12 | 82570050 | 82570150 | 1100-Lng-A-T | 62  | chr12:82570050-82570150 |
| chr12 | 82619250 | 82619350 | 1072-Lng-A-T | 59  | chr12:82619250-82619350 |
| chr12 | 82730250 | 82730350 | 1274-Lng-A-T | 138 | chr12:82730250-82730350 |
| chr12 | 82829150 | 82829250 | 1167-Lng-A-T | 70  | chr12:82829150-82829250 |
| chr12 | 82844150 | 82844250 | 1223-Lng-D-T | 43  | chr12:82844150-82844250 |
| chr12 | 82960450 | 82960550 | 1065-Lng-B-T | 43  | chr12:82960450-82960550 |
| chr12 | 83070350 | 83070450 | 1188-Lng-A-T | 134 | chr12:83070350-83070450 |
| chr12 | 83277550 | 83277650 | 1274-Lng-A-T | 113 | chr12:83277550-83277650 |
| chr12 | 83298050 | 83298150 | 1274-Lng-A-T | 160 | chr12:83298050-83298150 |
| chr12 | 83329050 | 83329150 | 1188-Lng-A-T | 37  | chr12:83329050-83329150 |
| chr12 | 83335250 | 83335350 | 1167-Lng-A-T | 111 | chr12:83335250-83335350 |
| chr12 | 83336950 | 83337050 | 1167-Lng-A-T | 107 | chr12:83336950-83337050 |
| chr12 | 83579750 | 83579850 | 901-Lng-A-T  | 57  | chr12:83579750-83579850 |
| chr12 | 83827950 | 83828050 | 1100-Lng-A-T | 117 | chr12:83827950-83828050 |
| chr12 | 83904650 | 83904750 | 1004-Lng-A-T | 78  | chr12:83904650-83904750 |
| chr12 | 84732650 | 84732750 | 1223-Lng-B-T | 45  | chr12:84732650-84732750 |
| chr12 | 84884550 | 84884650 | 1274-Lng-A-T | 49  | chr12:84884550-84884650 |
| chr12 | 84992450 | 84992550 | 1152-Lng-A-T | 34  | chr12:84992450-84992550 |
| chr12 | 84992950 | 84993050 | 1100-Lng-A-T | 62  | chr12:84992950-84993050 |
| chr12 | 85007450 | 85007550 | 1274-Lng-A-T | 294 | chr12:85007450-85007550 |
| chr12 | 85145850 | 85145950 | 1223-Lng-B-T | 89  | chr12:85145850-85145950 |
| chr12 | 85146550 | 85146650 | 1223-Lng-B-T | 83  | chr12:85146550-85146650 |
| chr12 | 85150150 | 85150250 | 1004-Lng-A-T | 54  | chr12:85150150-85150250 |
| chr12 | 85163750 | 85163850 | 1065-Lng-A-T | 68  | chr12:85163750-85163850 |
| chr12 | 85200950 | 85201050 | 1152-Lng-A-T | 72  | chr12:85200950-85201050 |
| chr12 | 85239750 | 85239850 | 1274-Lng-A-T | 64  | chr12:85239750-85239850 |
| chr12 | 85250750 | 85250850 | 1152-Lng-A-T | 44  | chr12:85250750-85250850 |
| chr12 | 85290450 | 85290550 | 1090-Lng-A-T | 67  | chr12:85290450-85290550 |
| chr12 | 85623650 | 85623750 | 1167-Lng-A-T | 141 | chr12:85623650-85623750 |
| chr12 | 85643850 | 85643950 | 1167-Lng-A-T | 64  | chr12:85643850-85643950 |
| chr12 | 85662150 | 85662250 | 1065-Lng-B-T | 48  | chr12:85662150-85662250 |
| chr12 | 85677950 | 85678050 | 1223-Lng-A-T | 176 | chr12:85677950-85678050 |
| chr12 | 85707750 | 85707850 | 1188-Lng-A-T | 66  | chr12:85707750-85707850 |
| chr12 | 85783450 | 85783550 | 1188-Lng-A-T | 73  | chr12:85783450-85783550 |
| chr12 | 85787750 | 85787850 | 1004-Lng-A-T | 60  | chr12:85787750-85787850 |
| chr12 | 85870450 | 85870550 | 1223-Lng-B-T | 85  | chr12:85870450-85870550 |
| chr12 | 86041450 | 86041550 | 1004-Lng-A-T | 57  | chr12:86041450-86041550 |

**Table S2: SB Insertion regions**

|       |          |          |              |     |                         |
|-------|----------|----------|--------------|-----|-------------------------|
| chr12 | 86136550 | 86136650 | 901-Lng-C-T  | 205 | chr12:86136550-86136650 |
| chr12 | 86144150 | 86144250 | 1065-Lng-C-T | 402 | chr12:86144150-86144250 |
| chr12 | 86151450 | 86151550 | 901-Lng-A-T  | 288 | chr12:86151450-86151550 |
| chr12 | 86154550 | 86154650 | 1274-Lng-A-T | 99  | chr12:86154550-86154650 |
| chr12 | 86294550 | 86294650 | 1004-Lng-A-T | 381 | chr12:86294550-86294650 |
| chr12 | 86302250 | 86302350 | 1065-Lng-C-T | 66  | chr12:86302250-86302350 |
| chr12 | 86392750 | 86392850 | 901-Lng-B-T  | 223 | chr12:86392750-86392850 |
| chr12 | 86412650 | 86412750 | 1004-Lng-A-T | 74  | chr12:86412650-86412750 |
| chr12 | 86425350 | 86425450 | 1274-Lng-A-T | 125 | chr12:86425350-86425450 |
| chr12 | 86452450 | 86452550 | 1152-Lng-A-T | 32  | chr12:86452450-86452550 |
| chr12 | 86458550 | 86458650 | 1065-Lng-B-T | 72  | chr12:86458550-86458650 |
| chr12 | 86706750 | 86706850 | 846-Lng-A-T  | 141 | chr12:86706750-86706850 |
| chr12 | 86826550 | 86826650 | 1065-Lng-C-T | 81  | chr12:86826550-86826650 |
| chr12 | 86953250 | 86953350 | 901-Lng-C-T  | 30  | chr12:86953250-86953350 |
| chr12 | 86954050 | 86954150 | 1065-Lng-A-T | 44  | chr12:86954050-86954150 |
| chr12 | 87117550 | 87117650 | 1167-Lng-A-T | 119 | chr12:87117550-87117650 |
| chr12 | 87208150 | 87208250 | 901-Lng-C-T  | 54  | chr12:87208150-87208250 |
| chr12 | 87456550 | 87456650 | 901-Lng-D-T  | 71  | chr12:87456550-87456650 |
| chr12 | 87684150 | 87684250 | 901-Lng-D-T  | 168 | chr12:87684150-87684250 |
| chr12 | 87692550 | 87692650 | 1004-Lng-A-T | 64  | chr12:87692550-87692650 |
| chr12 | 88164450 | 88164550 | 846-Lng-A-T  | 119 | chr12:88164450-88164550 |
| chr12 | 88296550 | 88296650 | 1004-Lng-A-T | 50  | chr12:88296550-88296650 |
| chr12 | 88516150 | 88516250 | 1152-Lng-A-T | 80  | chr12:88516150-88516250 |
| chr12 | 88540250 | 88540350 | 1090-Lng-A-T | 54  | chr12:88540250-88540350 |
| chr12 | 88596750 | 88596850 | 1065-Lng-B-T | 66  | chr12:88596750-88596850 |
| chr12 | 88745850 | 88745950 | 1100-Lng-A-T | 57  | chr12:88745850-88745950 |
| chr12 | 88760850 | 88760950 | 1072-Lng-A-T | 113 | chr12:88760850-88760950 |
| chr12 | 89347850 | 89347950 | 901-Lng-A-T  | 101 | chr12:89347850-89347950 |
| chr12 | 89357250 | 89357350 | 1004-Lng-A-T | 69  | chr12:89357250-89357350 |
| chr12 | 89539350 | 89539450 | 1004-Lng-A-T | 68  | chr12:89539350-89539450 |
| chr12 | 89605250 | 89605350 | 846-Lng-A-T  | 50  | chr12:89605250-89605350 |
| chr12 | 89740050 | 89740150 | 1100-Lng-A-T | 93  | chr12:89740050-89740150 |
| chr12 | 89867950 | 89868050 | 1100-Lng-B-T | 56  | chr12:89867950-89868050 |
| chr12 | 90291550 | 90291650 | 1065-Lng-A-T | 51  | chr12:90291550-90291650 |
| chr12 | 90421450 | 90421550 | 1065-Lng-A-T | 70  | chr12:90421450-90421550 |
| chr12 | 90516750 | 90516850 | 1090-Lng-A-T | 89  | chr12:90516750-90516850 |
| chr12 | 90558850 | 90558950 | 901-Lng-A-T  | 495 | chr12:90558850-90558950 |
| chr12 | 90715850 | 90715950 | 901-Lng-D-T  | 364 | chr12:90715850-90715950 |
| chr12 | 90718750 | 90718850 | 1065-Lng-A-T | 44  | chr12:90718750-90718850 |
| chr12 | 90866050 | 90866150 | 1151-Lng-A-T | 82  | chr12:90866050-90866150 |
| chr12 | 90944950 | 90945050 | 1065-Lng-B-T | 91  | chr12:90944950-90945050 |
| chr12 | 90957750 | 90957850 | 1065-Lng-A-T | 176 | chr12:90957750-90957850 |
| chr12 | 91084850 | 91084950 | 1188-Lng-A-T | 108 | chr12:91084850-91084950 |
| chr12 | 91162050 | 91162150 | 901-Lng-A-T  | 172 | chr12:91162050-91162150 |
| chr12 | 91251450 | 91251550 | 1065-Lng-C-T | 142 | chr12:91251450-91251550 |
| chr12 | 91386950 | 91387050 | 1065-Lng-A-T | 43  | chr12:91386950-91387050 |

**Table S2: SB Insertion regions**

|       |          |          |              |      |                         |
|-------|----------|----------|--------------|------|-------------------------|
| chr12 | 91539450 | 91539550 | 1004-Lng-A-T | 691  | chr12:91539450-91539550 |
| chr12 | 91596750 | 91596850 | 1004-Lng-A-T | 72   | chr12:91596750-91596850 |
| chr12 | 91802250 | 91802350 | 901-Lng-D-T  | 46   | chr12:91802250-91802350 |
| chr12 | 92050050 | 92050150 | 1223-Lng-D-T | 63   | chr12:92050050-92050150 |
| chr12 | 92087650 | 92087750 | 901-Lng-B-T  | 464  | chr12:92087650-92087750 |
| chr12 | 92439650 | 92439750 | 1065-Lng-B-T | 484  | chr12:92439650-92439750 |
| chr12 | 92542550 | 92542650 | 1167-Lng-A-T | 91   | chr12:92542550-92542650 |
| chr12 | 92704550 | 92704650 | 846-Lng-A-T  | 207  | chr12:92704550-92704650 |
| chr12 | 92734350 | 92734450 | 1090-Lng-B-T | 1168 | chr12:92734350-92734450 |
| chr12 | 92927350 | 92927450 | 1188-Lng-A-T | 152  | chr12:92927350-92927450 |
| chr12 | 93046550 | 93046650 | 1274-Lng-A-T | 68   | chr12:93046550-93046650 |
| chr12 | 93071150 | 93071250 | 1152-Lng-A-T | 69   | chr12:93071150-93071250 |
| chr12 | 93072650 | 93072750 | 1274-Lng-A-T | 61   | chr12:93072650-93072750 |
| chr12 | 93085650 | 93085750 | 1065-Lng-B-T | 51   | chr12:93085650-93085750 |
| chr12 | 93239950 | 93240050 | 1072-Lng-A-T | 112  | chr12:93239950-93240050 |
| chr12 | 93438350 | 93438450 | 1004-Lng-A-T | 56   | chr12:93438350-93438450 |
| chr12 | 93488550 | 93488650 | 1188-Lng-A-T | 39   | chr12:93488550-93488650 |
| chr12 | 93563850 | 93563950 | 901-Lng-D-T  | 63   | chr12:93563850-93563950 |
| chr12 | 93803950 | 93804050 | 1065-Lng-A-T | 102  | chr12:93803950-93804050 |
| chr12 | 93836050 | 93836150 | 1065-Lng-A-T | 44   | chr12:93836050-93836150 |
| chr12 | 93882550 | 93882650 | 1152-Lng-A-T | 105  | chr12:93882550-93882650 |
| chr12 | 94199750 | 94199850 | 1065-Lng-C-T | 91   | chr12:94199750-94199850 |
| chr12 | 94400550 | 94400650 | 1090-Lng-B-T | 94   | chr12:94400550-94400650 |
| chr12 | 94415050 | 94415150 | 846-Lng-A-T  | 132  | chr12:94415050-94415150 |
| chr12 | 94434650 | 94434750 | 1223-Lng-B-T | 79   | chr12:94434650-94434750 |
| chr12 | 94452350 | 94452450 | 901-Lng-B-T  | 122  | chr12:94452350-94452450 |
| chr12 | 94792550 | 94792650 | 1223-Lng-B-T | 211  | chr12:94792550-94792650 |
| chr12 | 94904950 | 94905050 | 1223-Lng-B-T | 40   | chr12:94904950-94905050 |
| chr12 | 94915550 | 94915650 | 1223-Lng-D-T | 45   | chr12:94915550-94915650 |
| chr12 | 95085850 | 95085950 | 1274-Lng-A-T | 54   | chr12:95085850-95085950 |
| chr12 | 95151050 | 95151150 | 1151-Lng-A-T | 469  | chr12:95151050-95151150 |
| chr12 | 95364050 | 95364150 | 1065-Lng-B-T | 56   | chr12:95364050-95364150 |
| chr12 | 95391550 | 95391650 | 1065-Lng-B-T | 64   | chr12:95391550-95391650 |
| chr12 | 95593850 | 95593950 | 1004-Lng-A-T | 49   | chr12:95593850-95593950 |
| chr12 | 95654150 | 95654250 | 1065-Lng-B-T | 59   | chr12:95654150-95654250 |
| chr12 | 95669650 | 95669750 | 1151-Lng-A-T | 69   | chr12:95669650-95669750 |
| chr12 | 95704050 | 95704150 | 1065-Lng-B-T | 47   | chr12:95704050-95704150 |
| chr12 | 95905150 | 95905250 | 1065-Lng-B-T | 86   | chr12:95905150-95905250 |
| chr12 | 96142150 | 96142250 | 1188-Lng-A-T | 56   | chr12:96142150-96142250 |
| chr12 | 96147750 | 96147850 | 1274-Lng-A-T | 84   | chr12:96147750-96147850 |
| chr12 | 96176450 | 96176550 | 846-Lng-A-T  | 231  | chr12:96176450-96176550 |
| chr12 | 96202650 | 96202750 | 1072-Lng-A-T | 75   | chr12:96202650-96202750 |
| chr12 | 96323150 | 96323250 | 901-Lng-A-T  | 92   | chr12:96323150-96323250 |
| chr12 | 96414550 | 96414650 | 846-Lng-A-T  | 95   | chr12:96414550-96414650 |
| chr12 | 96440650 | 96440750 | 1152-Lng-A-T | 69   | chr12:96440650-96440750 |
| chr12 | 96531650 | 96531750 | 1065-Lng-B-T | 46   | chr12:96531650-96531750 |

**Table S2: SB Insertion regions**

|       |           |           |              |     |                           |
|-------|-----------|-----------|--------------|-----|---------------------------|
| chr12 | 96831750  | 96831850  | 1072-Lng-A-T | 197 | chr12:96831750-96831850   |
| chr12 | 96875550  | 96875650  | 1152-Lng-A-T | 325 | chr12:96875550-96875650   |
| chr12 | 97028450  | 97028550  | 846-Lng-A-T  | 635 | chr12:97028450-97028550   |
| chr12 | 97054050  | 97054150  | 1223-Lng-B-T | 50  | chr12:97054050-97054150   |
| chr12 | 97200050  | 97200150  | 846-Lng-A-T  | 172 | chr12:97200050-97200150   |
| chr12 | 97231550  | 97231650  | 1152-Lng-A-T | 195 | chr12:97231550-97231650   |
| chr12 | 97250950  | 97251050  | 1223-Lng-A-T | 91  | chr12:97250950-97251050   |
| chr12 | 97550850  | 97550950  | 901-Lng-C-T  | 67  | chr12:97550850-97550950   |
| chr12 | 97658950  | 97659050  | 1004-Lng-A-T | 85  | chr12:97658950-97659050   |
| chr12 | 97693550  | 97693650  | 1151-Lng-A-T | 61  | chr12:97693550-97693650   |
| chr12 | 97743650  | 97743750  | 1065-Lng-B-T | 48  | chr12:97743650-97743750   |
| chr12 | 98036150  | 98036250  | 1152-Lng-A-T | 33  | chr12:98036150-98036250   |
| chr12 | 98042250  | 98042350  | 1274-Lng-A-T | 70  | chr12:98042250-98042350   |
| chr12 | 98066650  | 98066750  | 1004-Lng-A-T | 160 | chr12:98066650-98066750   |
| chr12 | 98314050  | 98314150  | 846-Lng-A-T  | 64  | chr12:98314050-98314150   |
| chr12 | 98315050  | 98315150  | 1004-Lng-A-T | 147 | chr12:98315050-98315150   |
| chr12 | 98323050  | 98323150  | 901-Lng-A-T  | 537 | chr12:98323050-98323150   |
| chr12 | 98340350  | 98340450  | 1274-Lng-A-T | 80  | chr12:98340350-98340450   |
| chr12 | 98347750  | 98347850  | 901-Lng-A-T  | 396 | chr12:98347750-98347850   |
| chr12 | 98414550  | 98414650  | 1004-Lng-A-T | 66  | chr12:98414550-98414650   |
| chr12 | 98473150  | 98473250  | 1065-Lng-C-T | 64  | chr12:98473150-98473250   |
| chr12 | 98484250  | 98484350  | 901-Lng-A-T  | 56  | chr12:98484250-98484350   |
| chr12 | 98501650  | 98501750  | 1188-Lng-A-T | 367 | chr12:98501650-98501750   |
| chr12 | 98735350  | 98735450  | 1090-Lng-A-T | 77  | chr12:98735350-98735450   |
| chr12 | 98867650  | 98867750  | 1004-Lng-A-T | 66  | chr12:98867650-98867750   |
| chr12 | 99128650  | 99128750  | 1188-Lng-A-T | 42  | chr12:99128650-99128750   |
| chr12 | 99133950  | 99134050  | 1065-Lng-A-T | 37  | chr12:99133950-99134050   |
| chr12 | 99225350  | 99225450  | 1188-Lng-A-T | 73  | chr12:99225350-99225450   |
| chr12 | 99447450  | 99447550  | 1188-Lng-A-T | 105 | chr12:99447450-99447550   |
| chr12 | 99477050  | 99477150  | 901-Lng-C-T  | 34  | chr12:99477050-99477150   |
| chr12 | 99500650  | 99500750  | 1090-Lng-A-T | 101 | chr12:99500650-99500750   |
| chr12 | 99571150  | 99571250  | 1072-Lng-A-T | 74  | chr12:99571150-99571250   |
| chr12 | 99923450  | 99923550  | 1152-Lng-A-T | 95  | chr12:99923450-99923550   |
| chr12 | 99958950  | 99959050  | 1151-Lng-A-T | 89  | chr12:99958950-99959050   |
| chr12 | 99965750  | 99965850  | 1065-Lng-A-T | 58  | chr12:99965750-99965850   |
| chr12 | 100002250 | 100002350 | 1223-Lng-A-T | 432 | chr12:100002250-100002350 |
| chr12 | 100006750 | 100006850 | 1004-Lng-A-T | 75  | chr12:100006750-100006850 |
| chr12 | 100032050 | 100032150 | 1065-Lng-A-T | 102 | chr12:100032050-100032150 |
| chr12 | 100060350 | 100060450 | 1072-Lng-A-T | 117 | chr12:100060350-100060450 |
| chr12 | 100068050 | 100068150 | 1004-Lng-A-T | 55  | chr12:100068050-100068150 |
| chr12 | 100212350 | 100212450 | 1065-Lng-A-T | 73  | chr12:100212350-100212450 |
| chr12 | 100413050 | 100413150 | 1004-Lng-A-T | 142 | chr12:100413050-100413150 |
| chr12 | 100455950 | 100456050 | 1090-Lng-A-T | 76  | chr12:100455950-100456050 |
| chr12 | 100482250 | 100482350 | 1065-Lng-B-T | 100 | chr12:100482250-100482350 |
| chr12 | 100530850 | 100530950 | 1223-Lng-A-T | 177 | chr12:100530850-100530950 |
| chr12 | 100538950 | 100539050 | 1223-Lng-B-T | 74  | chr12:100538950-100539050 |

**Table S2: SB Insertion regions**

|       |           |           |              |     |                           |
|-------|-----------|-----------|--------------|-----|---------------------------|
| chr12 | 100549050 | 100549150 | 1065-Lng-A-T | 34  | chr12:100549050-100549150 |
| chr12 | 100561150 | 100561250 | 1004-Lng-A-T | 74  | chr12:100561150-100561250 |
| chr12 | 100586550 | 100586650 | 1100-Lng-A-T | 248 | chr12:100586550-100586650 |
| chr12 | 100600950 | 100601050 | 1223-Lng-B-T | 92  | chr12:100600950-100601050 |
| chr12 | 100785250 | 100785350 | 1167-Lng-A-T | 114 | chr12:100785250-100785350 |
| chr12 | 101008950 | 101009050 | 1065-Lng-C-T | 111 | chr12:101008950-101009050 |
| chr12 | 101303950 | 101304050 | 1004-Lng-A-T | 103 | chr12:101303950-101304050 |
| chr12 | 101677450 | 101677550 | 1004-Lng-A-T | 62  | chr12:101677450-101677550 |
| chr12 | 101806050 | 101806150 | 1065-Lng-A-T | 41  | chr12:101806050-101806150 |
| chr12 | 101827850 | 101827950 | 901-Lng-C-T  | 28  | chr12:101827850-101827950 |
| chr12 | 102033550 | 102033650 | 1274-Lng-A-T | 50  | chr12:102033550-102033650 |
| chr12 | 102283550 | 102283650 | 901-Lng-D-T  | 724 | chr12:102283550-102283650 |
| chr12 | 102316150 | 102316250 | 1274-Lng-A-T | 50  | chr12:102316150-102316250 |
| chr12 | 102359250 | 102359350 | 1065-Lng-B-T | 77  | chr12:102359250-102359350 |
| chr12 | 102780050 | 102780150 | 901-Lng-D-T  | 48  | chr12:102780050-102780150 |
| chr12 | 102872950 | 102873050 | 1090-Lng-A-T | 73  | chr12:102872950-102873050 |
| chr12 | 102885350 | 102885450 | 1188-Lng-A-T | 154 | chr12:102885350-102885450 |
| chr12 | 102915750 | 102915850 | 1223-Lng-B-T | 35  | chr12:102915750-102915850 |
| chr12 | 102935450 | 102935550 | 1072-Lng-A-T | 266 | chr12:102935450-102935550 |
| chr12 | 102947250 | 102947350 | 1004-Lng-A-T | 803 | chr12:102947250-102947350 |
| chr12 | 102960250 | 102960350 | 1223-Lng-C-T | 53  | chr12:102960250-102960350 |
| chr12 | 102967250 | 102967350 | 1004-Lng-A-T | 51  | chr12:102967250-102967350 |
| chr12 | 103085550 | 103085650 | 901-Lng-B-T  | 54  | chr12:103085550-103085650 |
| chr12 | 103108150 | 103108250 | 1223-Lng-C-T | 53  | chr12:103108150-103108250 |
| chr12 | 103177950 | 103178050 | 1188-Lng-A-T | 47  | chr12:103177950-103178050 |
| chr12 | 103288750 | 103288850 | 1072-Lng-A-T | 106 | chr12:103288750-103288850 |
| chr12 | 103292150 | 103292250 | 1065-Lng-C-T | 65  | chr12:103292150-103292250 |
| chr12 | 103341750 | 103341850 | 901-Lng-B-T  | 74  | chr12:103341750-103341850 |
| chr12 | 103348850 | 103348950 | 1151-Lng-A-T | 57  | chr12:103348850-103348950 |
| chr12 | 103375350 | 103375450 | 1100-Lng-A-T | 71  | chr12:103375350-103375450 |
| chr12 | 103495050 | 103495150 | 1152-Lng-A-T | 84  | chr12:103495050-103495150 |
| chr12 | 103696450 | 103696550 | 1100-Lng-A-T | 246 | chr12:103696450-103696550 |
| chr12 | 103730050 | 103730150 | 1072-Lng-A-T | 52  | chr12:103730050-103730150 |
| chr12 | 103883350 | 103883450 | 1274-Lng-A-T | 142 | chr12:103883350-103883450 |
| chr12 | 103957550 | 103957650 | 1274-Lng-A-T | 100 | chr12:103957550-103957650 |
| chr12 | 103990950 | 103991050 | 1065-Lng-A-T | 36  | chr12:103990950-103991050 |
| chr12 | 103992350 | 103992450 | 1004-Lng-A-T | 269 | chr12:103992350-103992450 |
| chr12 | 104037150 | 104037250 | 1065-Lng-B-T | 55  | chr12:104037150-104037250 |
| chr12 | 104042650 | 104042750 | 1223-Lng-A-T | 59  | chr12:104042650-104042750 |
| chr12 | 104048150 | 104048250 | 1152-Lng-A-T | 38  | chr12:104048150-104048250 |
| chr12 | 104048150 | 104048250 | 1167-Lng-A-T | 122 | chr12:104048150-104048250 |
| chr12 | 104067150 | 104067250 | 1188-Lng-A-T | 436 | chr12:104067150-104067250 |
| chr12 | 104073350 | 104073450 | 901-Lng-C-T  | 43  | chr12:104073350-104073450 |
| chr12 | 104073950 | 104074050 | 1274-Lng-A-T | 58  | chr12:104073950-104074050 |
| chr12 | 104100750 | 104100850 | 1004-Lng-A-T | 208 | chr12:104100750-104100850 |
| chr12 | 104111050 | 104111150 | 1004-Lng-A-T | 162 | chr12:104111050-104111150 |

**Table S2: SB Insertion regions**

|       |           |           |              |      |                           |
|-------|-----------|-----------|--------------|------|---------------------------|
| chr12 | 104490950 | 104491050 | 1004-Lng-A-T | 582  | chr12:104490950-104491050 |
| chr12 | 104565050 | 104565150 | 1274-Lng-A-T | 75   | chr12:104565050-104565150 |
| chr12 | 104730950 | 104731050 | 1167-Lng-A-T | 65   | chr12:104730950-104731050 |
| chr12 | 104823350 | 104823450 | 1151-Lng-A-T | 56   | chr12:104823350-104823450 |
| chr12 | 104938750 | 104938850 | 1004-Lng-A-T | 64   | chr12:104938750-104938850 |
| chr12 | 105488950 | 105489050 | 901-Lng-D-T  | 54   | chr12:105488950-105489050 |
| chr12 | 105560350 | 105560450 | 1223-Lng-B-T | 41   | chr12:105560350-105560450 |
| chr12 | 105766450 | 105766550 | 1090-Lng-B-T | 157  | chr12:105766450-105766550 |
| chr12 | 106014350 | 106014450 | 846-Lng-A-T  | 153  | chr12:106014350-106014450 |
| chr12 | 106066850 | 106066950 | 1223-Lng-B-T | 390  | chr12:106066850-106066950 |
| chr12 | 106097250 | 106097350 | 1223-Lng-A-T | 1122 | chr12:106097250-106097350 |
| chr12 | 106521850 | 106521950 | 1274-Lng-A-T | 95   | chr12:106521850-106521950 |
| chr12 | 106851450 | 106851550 | 1065-Lng-B-T | 73   | chr12:106851450-106851550 |
| chr12 | 106910150 | 106910250 | 1072-Lng-A-T | 52   | chr12:106910150-106910250 |
| chr12 | 106915150 | 106915250 | 1167-Lng-A-T | 110  | chr12:106915150-106915250 |
| chr12 | 107034750 | 107034850 | 901-Lng-A-T  | 123  | chr12:107034750-107034850 |
| chr12 | 107036350 | 107036450 | 1100-Lng-A-T | 75   | chr12:107036350-107036450 |
| chr12 | 107260050 | 107260150 | 846-Lng-A-T  | 159  | chr12:107260050-107260150 |
| chr12 | 107267450 | 107267550 | 846-Lng-A-T  | 68   | chr12:107267450-107267550 |
| chr12 | 107717050 | 107717150 | 1072-Lng-A-T | 74   | chr12:107717050-107717150 |
| chr12 | 107913550 | 107913650 | 1065-Lng-B-T | 91   | chr12:107913550-107913650 |
| chr12 | 108297150 | 108297250 | 901-Lng-A-T  | 150  | chr12:108297150-108297250 |
| chr12 | 108701850 | 108701950 | 1152-Lng-A-T | 133  | chr12:108701850-108701950 |
| chr12 | 108870150 | 108870250 | 1065-Lng-C-T | 62   | chr12:108870150-108870250 |
| chr12 | 109211650 | 109211750 | 1004-Lng-A-T | 64   | chr12:109211650-109211750 |
| chr12 | 109371850 | 109371950 | 1223-Lng-A-T | 71   | chr12:109371850-109371950 |
| chr12 | 109389050 | 109389150 | 1065-Lng-A-T | 119  | chr12:109389050-109389150 |
| chr12 | 109415050 | 109415150 | 1072-Lng-A-T | 58   | chr12:109415050-109415150 |
| chr12 | 109455650 | 109455750 | 1072-Lng-A-T | 63   | chr12:109455650-109455750 |
| chr12 | 109532050 | 109532150 | 901-Lng-D-T  | 235  | chr12:109532050-109532150 |
| chr12 | 109602450 | 109602550 | 846-Lng-A-T  | 62   | chr12:109602450-109602550 |
| chr12 | 109605250 | 109605350 | 1090-Lng-B-T | 106  | chr12:109605250-109605350 |
| chr12 | 109668650 | 109668750 | 1072-Lng-A-T | 61   | chr12:109668650-109668750 |
| chr12 | 109689450 | 109689550 | 1004-Lng-A-T | 75   | chr12:109689450-109689550 |
| chr12 | 109720050 | 109720150 | 901-Lng-A-T  | 82   | chr12:109720050-109720150 |
| chr12 | 109753750 | 109753850 | 1072-Lng-A-T | 93   | chr12:109753750-109753850 |
| chr12 | 110106550 | 110106650 | 1223-Lng-D-T | 43   | chr12:110106550-110106650 |
| chr12 | 110414250 | 110414350 | 1223-Lng-B-T | 207  | chr12:110414250-110414350 |
| chr12 | 110751850 | 110751950 | 1274-Lng-A-T | 72   | chr12:110751850-110751950 |
| chr12 | 111251950 | 111252050 | 1223-Lng-B-T | 139  | chr12:111251950-111252050 |
| chr12 | 111697250 | 111697350 | 1072-Lng-A-T | 62   | chr12:111697250-111697350 |
| chr12 | 111725050 | 111725150 | 1223-Lng-C-T | 1178 | chr12:111725050-111725150 |
| chr12 | 111775550 | 111775650 | 1152-Lng-A-T | 59   | chr12:111775550-111775650 |
| chr12 | 112110050 | 112110150 | 1072-Lng-A-T | 100  | chr12:112110050-112110150 |
| chr12 | 112170050 | 112170150 | 1223-Lng-B-T | 181  | chr12:112170050-112170150 |
| chr12 | 112308050 | 112308150 | 1004-Lng-A-T | 119  | chr12:112308050-112308150 |



**Table S2: SB Insertion regions**

|       |           |           |              |      |                           |
|-------|-----------|-----------|--------------|------|---------------------------|
| chr12 | 112316750 | 112316850 | 1004-Lng-A-T | 201  | chr12:112316750-112316850 |
| chr12 | 112323950 | 112324050 | 1167-Lng-A-T | 50   | chr12:112323950-112324050 |
| chr12 | 112338550 | 112338650 | 1100-Lng-B-T | 8740 | chr12:112338550-112338650 |
| chr12 | 112406950 | 112407050 | 1223-Lng-B-T | 173  | chr12:112406950-112407050 |
| chr12 | 112410050 | 112410150 | 1004-Lng-A-T | 124  | chr12:112410050-112410150 |
| chr12 | 112418050 | 112418150 | 1065-Lng-B-T | 265  | chr12:112418050-112418150 |
| chr12 | 112489950 | 112490050 | 1151-Lng-A-T | 411  | chr12:112489950-112490050 |
| chr12 | 112591850 | 112591950 | 1004-Lng-A-T | 105  | chr12:112591850-112591950 |
| chr12 | 112829150 | 112829250 | 1274-Lng-A-T | 125  | chr12:112829150-112829250 |
| chr12 | 112840850 | 112840950 | 1065-Lng-A-T | 89   | chr12:112840850-112840950 |
| chr12 | 112861250 | 112861350 | 1065-Lng-A-T | 69   | chr12:112861250-112861350 |
| chr12 | 112887850 | 112887950 | 1072-Lng-A-T | 55   | chr12:112887850-112887950 |
| chr12 | 113011250 | 113011350 | 1100-Lng-A-T | 86   | chr12:113011250-113011350 |
| chr12 | 113074150 | 113074250 | 1004-Lng-A-T | 61   | chr12:113074150-113074250 |
| chr12 | 113124150 | 113124250 | 1100-Lng-A-T | 113  | chr12:113124150-113124250 |
| chr12 | 113127850 | 113127950 | 1223-Lng-B-T | 41   | chr12:113127850-113127950 |
| chr12 | 113135450 | 113135550 | 1223-Lng-A-T | 63   | chr12:113135450-113135550 |
| chr12 | 113268950 | 113269050 | 1090-Lng-A-T | 98   | chr12:113268950-113269050 |
| chr12 | 113639250 | 113639350 | 901-Lng-A-T  | 61   | chr12:113639250-113639350 |
| chr12 | 113920450 | 113920550 | 1274-Lng-A-T | 107  | chr12:113920450-113920550 |
| chr12 | 114055050 | 114055150 | 1274-Lng-A-T | 138  | chr12:114055050-114055150 |
| chr12 | 114187050 | 114187150 | 1151-Lng-A-T | 113  | chr12:114187050-114187150 |
| chr12 | 114305750 | 114305850 | 1223-Lng-B-T | 261  | chr12:114305750-114305850 |
| chr12 | 114319150 | 114319250 | 1090-Lng-B-T | 373  | chr12:114319150-114319250 |
| chr12 | 114377050 | 114377150 | 1223-Lng-B-T | 71   | chr12:114377050-114377150 |
| chr12 | 114379150 | 114379250 | 1152-Lng-A-T | 48   | chr12:114379150-114379250 |
| chr12 | 114418950 | 114419050 | 1004-Lng-A-T | 96   | chr12:114418950-114419050 |
| chr12 | 114606150 | 114606250 | 901-Lng-C-T  | 127  | chr12:114606150-114606250 |
| chr12 | 114763850 | 114763950 | 1004-Lng-A-T | 64   | chr12:114763850-114763950 |
| chr12 | 114785350 | 114785450 | 901-Lng-D-T  | 468  | chr12:114785350-114785450 |
| chr12 | 114797550 | 114797650 | 1004-Lng-A-T | 69   | chr12:114797550-114797650 |
| chr12 | 114890050 | 114890150 | 1065-Lng-B-T | 83   | chr12:114890050-114890150 |
| chr12 | 114902850 | 114902950 | 1065-Lng-A-T | 75   | chr12:114902850-114902950 |
| chr12 | 114955650 | 114955750 | 1223-Lng-C-T | 44   | chr12:114955650-114955750 |
| chr12 | 115118250 | 115118350 | 901-Lng-A-T  | 118  | chr12:115118250-115118350 |
| chr12 | 115459650 | 115459750 | 1167-Lng-A-T | 75   | chr12:115459650-115459750 |
| chr12 | 115758750 | 115758850 | 1004-Lng-A-T | 58   | chr12:115758750-115758850 |
| chr12 | 115897350 | 115897450 | 1004-Lng-A-T | 64   | chr12:115897350-115897450 |
| chr12 | 115924050 | 115924150 | 901-Lng-D-T  | 122  | chr12:115924050-115924150 |
| chr12 | 116058150 | 116058250 | 1004-Lng-A-T | 68   | chr12:116058150-116058250 |
| chr12 | 116321250 | 116321350 | 846-Lng-A-T  | 106  | chr12:116321250-116321350 |
| chr12 | 116410950 | 116411050 | 846-Lng-A-T  | 89   | chr12:116410950-116411050 |
| chr12 | 116418550 | 116418650 | 1090-Lng-A-T | 50   | chr12:116418550-116418650 |
| chr12 | 116442150 | 116442250 | 1065-Lng-A-T | 175  | chr12:116442150-116442250 |
| chr12 | 116544050 | 116544150 | 1004-Lng-A-T | 58   | chr12:116544050-116544150 |
| chr12 | 116687250 | 116687350 | 1100-Lng-A-T | 83   | chr12:116687250-116687350 |

**Table S2: SB Insertion regions**

|       |           |           |              |     |                           |
|-------|-----------|-----------|--------------|-----|---------------------------|
| chr12 | 116761550 | 116761650 | 1152-Lng-A-T | 72  | chr12:116761550-116761650 |
| chr12 | 116850050 | 116850150 | 901-Lng-A-T  | 73  | chr12:116850050-116850150 |
| chr12 | 116879950 | 116880050 | 1090-Lng-B-T | 873 | chr12:116879950-116880050 |
| chr12 | 116899850 | 116899950 | 1152-Lng-A-T | 33  | chr12:116899850-116899950 |
| chr12 | 116950250 | 116950350 | 1090-Lng-A-T | 483 | chr12:116950250-116950350 |
| chr12 | 117122050 | 117122150 | 1090-Lng-A-T | 64  | chr12:117122050-117122150 |
| chr12 | 117155650 | 117155750 | 1065-Lng-A-T | 54  | chr12:117155650-117155750 |
| chr12 | 117234250 | 117234350 | 1004-Lng-A-T | 57  | chr12:117234250-117234350 |
| chr12 | 117432950 | 117433050 | 1065-Lng-A-T | 57  | chr12:117432950-117433050 |
| chr12 | 117469850 | 117469950 | 1100-Lng-A-T | 101 | chr12:117469850-117469950 |
| chr12 | 117480450 | 117480550 | 1072-Lng-A-T | 48  | chr12:117480450-117480550 |
| chr12 | 117527350 | 117527450 | 1100-Lng-A-T | 71  | chr12:117527350-117527450 |
| chr12 | 117531650 | 117531750 | 1100-Lng-A-T | 249 | chr12:117531650-117531750 |
| chr12 | 117558650 | 117558750 | 901-Lng-D-T  | 54  | chr12:117558650-117558750 |
| chr12 | 117567550 | 117567650 | 1065-Lng-B-T | 47  | chr12:117567550-117567650 |
| chr12 | 117577850 | 117577950 | 901-Lng-A-T  | 127 | chr12:117577850-117577950 |
| chr12 | 117701050 | 117701150 | 1065-Lng-B-T | 176 | chr12:117701050-117701150 |
| chr12 | 117848150 | 117848250 | 1188-Lng-A-T | 41  | chr12:117848150-117848250 |
| chr12 | 117861850 | 117861950 | 1065-Lng-A-T | 96  | chr12:117861850-117861950 |
| chr12 | 117902350 | 117902450 | 1100-Lng-A-T | 113 | chr12:117902350-117902450 |
| chr12 | 117924750 | 117924850 | 1100-Lng-A-T | 55  | chr12:117924750-117924850 |
| chr12 | 118043050 | 118043150 | 901-Lng-B-T  | 661 | chr12:118043050-118043150 |
| chr12 | 118276150 | 118276250 | 901-Lng-C-T  | 92  | chr12:118276150-118276250 |
| chr12 | 118331650 | 118331750 | 1072-Lng-A-T | 75  | chr12:118331650-118331750 |
| chr12 | 118469350 | 118469450 | 1223-Lng-A-T | 54  | chr12:118469350-118469450 |
| chr12 | 118495350 | 118495450 | 901-Lng-B-T  | 236 | chr12:118495350-118495450 |
| chr12 | 118604750 | 118604850 | 1065-Lng-A-T | 116 | chr12:118604750-118604850 |
| chr12 | 118669050 | 118669150 | 1274-Lng-A-T | 62  | chr12:118669050-118669150 |
| chr12 | 118710050 | 118710150 | 1167-Lng-A-T | 45  | chr12:118710050-118710150 |
| chr12 | 118750150 | 118750250 | 1167-Lng-A-T | 104 | chr12:118750150-118750250 |
| chr12 | 118755450 | 118755550 | 1188-Lng-A-T | 38  | chr12:118755450-118755550 |
| chr12 | 118797850 | 118797950 | 1151-Lng-A-T | 93  | chr12:118797850-118797950 |
| chr12 | 118810450 | 118810550 | 1223-Lng-D-T | 62  | chr12:118810450-118810550 |
| chr12 | 118819750 | 118819850 | 1004-Lng-A-T | 144 | chr12:118819750-118819850 |
| chr12 | 118829050 | 118829150 | 1072-Lng-A-T | 55  | chr12:118829050-118829150 |
| chr12 | 118883950 | 118884050 | 1065-Lng-A-T | 303 | chr12:118883950-118884050 |
| chr12 | 118983850 | 118983950 | 901-Lng-B-T  | 38  | chr12:118983850-118983950 |
| chr12 | 118983850 | 118983950 | 1100-Lng-A-T | 77  | chr12:118983850-118983950 |
| chr12 | 119060550 | 119060650 | 901-Lng-B-T  | 207 | chr12:119060550-119060650 |
| chr12 | 119063450 | 119063550 | 1090-Lng-A-T | 60  | chr12:119063450-119063550 |
| chr12 | 119066850 | 119066950 | 901-Lng-A-T  | 98  | chr12:119066850-119066950 |
| chr12 | 119070150 | 119070250 | 1223-Lng-C-T | 167 | chr12:119070150-119070250 |
| chr12 | 119089350 | 119089450 | 1188-Lng-A-T | 149 | chr12:119089350-119089450 |
| chr12 | 119122850 | 119122950 | 1152-Lng-A-T | 118 | chr12:119122850-119122950 |
| chr12 | 119160650 | 119160750 | 1152-Lng-A-T | 411 | chr12:119160650-119160750 |
| chr12 | 119235550 | 119235650 | 1072-Lng-A-T | 63  | chr12:119235550-119235650 |

**Table S2: SB Insertion regions**

|       |           |           |              |      |                           |
|-------|-----------|-----------|--------------|------|---------------------------|
| chr12 | 119236150 | 119236250 | 1004-Lng-A-T | 515  | chr12:119236150-119236250 |
| chr12 | 119251150 | 119251250 | 1004-Lng-A-T | 74   | chr12:119251150-119251250 |
| chr12 | 119486650 | 119486750 | 1090-Lng-A-T | 105  | chr12:119486650-119486750 |
| chr12 | 119528250 | 119528350 | 901-Lng-B-T  | 163  | chr12:119528250-119528350 |
| chr12 | 119843150 | 119843250 | 1274-Lng-A-T | 83   | chr12:119843150-119843250 |
| chr12 | 120310350 | 120310450 | 1072-Lng-A-T | 157  | chr12:120310350-120310450 |
| chr12 | 120388850 | 120388950 | 1065-Lng-C-T | 63   | chr12:120388850-120388950 |
| chr12 | 120440750 | 120440850 | 1188-Lng-A-T | 43   | chr12:120440750-120440850 |
| chr12 | 120643350 | 120643450 | 1223-Lng-C-T | 55   | chr12:120643350-120643450 |
| chr12 | 120645850 | 120645950 | 1100-Lng-A-T | 110  | chr12:120645850-120645950 |
| chr12 | 120690250 | 120690350 | 1223-Lng-B-T | 172  | chr12:120690250-120690350 |
| chr12 | 120707750 | 120707850 | 1223-Lng-B-T | 86   | chr12:120707750-120707850 |
| chr12 | 120878150 | 120878250 | 901-Lng-B-T  | 82   | chr12:120878150-120878250 |
| chr12 | 121218150 | 121218250 | 901-Lng-B-T  | 151  | chr12:121218150-121218250 |
| chr12 | 121243750 | 121243850 | 1223-Lng-A-T | 1669 | chr12:121243750-121243850 |
| chr13 | 3564050   | 3564150   | 1072-Lng-A-T | 53   | chr13:3564050-3564150     |
| chr13 | 3600850   | 3600950   | 1223-Lng-A-T | 161  | chr13:3600850-3600950     |
| chr13 | 3729350   | 3729450   | 1152-Lng-A-T | 83   | chr13:3729350-3729450     |
| chr13 | 4029450   | 4029550   | 901-Lng-B-T  | 126  | chr13:4029450-4029550     |
| chr13 | 4181750   | 4181850   | 1065-Lng-A-T | 76   | chr13:4181750-4181850     |
| chr13 | 4250750   | 4250850   | 1100-Lng-B-T | 176  | chr13:4250750-4250850     |
| chr13 | 4539750   | 4539850   | 1151-Lng-A-T | 54   | chr13:4539750-4539850     |
| chr13 | 4559250   | 4559350   | 1100-Lng-A-T | 109  | chr13:4559250-4559350     |
| chr13 | 4581350   | 4581450   | 1065-Lng-C-T | 170  | chr13:4581350-4581450     |
| chr13 | 4597250   | 4597350   | 901-Lng-D-T  | 361  | chr13:4597250-4597350     |
| chr13 | 4824150   | 4824250   | 1065-Lng-B-T | 47   | chr13:4824150-4824250     |
| chr13 | 5340550   | 5340650   | 1090-Lng-A-T | 1129 | chr13:5340550-5340650     |
| chr13 | 5542850   | 5542950   | 1151-Lng-A-T | 59   | chr13:5542850-5542950     |
| chr13 | 5720150   | 5720250   | 1223-Lng-C-T | 47   | chr13:5720150-5720250     |
| chr13 | 5729150   | 5729250   | 1090-Lng-A-T | 70   | chr13:5729150-5729250     |
| chr13 | 5773650   | 5773750   | 1100-Lng-A-T | 83   | chr13:5773650-5773750     |
| chr13 | 5971950   | 5972050   | 901-Lng-C-T  | 47   | chr13:5971950-5972050     |
| chr13 | 6035650   | 6035750   | 846-Lng-A-T  | 119  | chr13:6035650-6035750     |
| chr13 | 6346650   | 6346750   | 1100-Lng-A-T | 56   | chr13:6346650-6346750     |
| chr13 | 6537850   | 6537950   | 1065-Lng-A-T | 112  | chr13:6537850-6537950     |
| chr13 | 6583450   | 6583550   | 1100-Lng-B-T | 78   | chr13:6583450-6583550     |
| chr13 | 7175950   | 7176050   | 1065-Lng-C-T | 523  | chr13:7175950-7176050     |
| chr13 | 7467550   | 7467650   | 901-Lng-A-T  | 72   | chr13:7467550-7467650     |
| chr13 | 7739350   | 7739450   | 901-Lng-B-T  | 62   | chr13:7739350-7739450     |
| chr13 | 7874850   | 7874950   | 901-Lng-C-T  | 39   | chr13:7874850-7874950     |
| chr13 | 8063250   | 8063350   | 1152-Lng-A-T | 62   | chr13:8063250-8063350     |
| chr13 | 8275150   | 8275250   | 1065-Lng-A-T | 37   | chr13:8275150-8275250     |
| chr13 | 8818050   | 8818150   | 1090-Lng-A-T | 86   | chr13:8818050-8818150     |
| chr13 | 8871050   | 8871150   | 1188-Lng-A-T | 42   | chr13:8871050-8871150     |
| chr13 | 8871050   | 8871150   | 1090-Lng-B-T | 601  | chr13:8871050-8871150     |
| chr13 | 8966450   | 8966550   | 1004-Lng-A-T | 62   | chr13:8966450-8966550     |

**Table S2: SB Insertion regions**

|       |          |          |              |     |                         |
|-------|----------|----------|--------------|-----|-------------------------|
| chr13 | 8969250  | 8969350  | 1188-Lng-A-T | 35  | chr13:8969250-8969350   |
| chr13 | 9014550  | 9014650  | 1090-Lng-A-T | 94  | chr13:9014550-9014650   |
| chr13 | 9096250  | 9096350  | 1152-Lng-A-T | 82  | chr13:9096250-9096350   |
| chr13 | 9249050  | 9249150  | 1090-Lng-B-T | 480 | chr13:9249050-9249150   |
| chr13 | 9255650  | 9255750  | 1065-Lng-B-T | 322 | chr13:9255650-9255750   |
| chr13 | 9303150  | 9303250  | 1100-Lng-A-T | 53  | chr13:9303150-9303250   |
| chr13 | 9332550  | 9332650  | 1274-Lng-A-T | 81  | chr13:9332550-9332650   |
| chr13 | 9334150  | 9334250  | 1090-Lng-A-T | 91  | chr13:9334150-9334250   |
| chr13 | 9338650  | 9338750  | 1004-Lng-A-T | 53  | chr13:9338650-9338750   |
| chr13 | 9361950  | 9362050  | 1004-Lng-A-T | 85  | chr13:9361950-9362050   |
| chr13 | 9366950  | 9367050  | 1065-Lng-B-T | 57  | chr13:9366950-9367050   |
| chr13 | 9398750  | 9398850  | 1065-Lng-A-T | 58  | chr13:9398750-9398850   |
| chr13 | 9490850  | 9490950  | 1004-Lng-A-T | 521 | chr13:9490850-9490950   |
| chr13 | 9509050  | 9509150  | 1151-Lng-A-T | 129 | chr13:9509050-9509150   |
| chr13 | 9630750  | 9630850  | 901-Lng-C-T  | 45  | chr13:9630750-9630850   |
| chr13 | 9691150  | 9691250  | 901-Lng-A-T  | 679 | chr13:9691150-9691250   |
| chr13 | 9704450  | 9704550  | 1072-Lng-A-T | 63  | chr13:9704450-9704550   |
| chr13 | 9710550  | 9710650  | 1188-Lng-A-T | 34  | chr13:9710550-9710650   |
| chr13 | 9719950  | 9720050  | 1274-Lng-A-T | 74  | chr13:9719950-9720050   |
| chr13 | 9749550  | 9749650  | 901-Lng-C-T  | 908 | chr13:9749550-9749650   |
| chr13 | 10138550 | 10138650 | 1065-Lng-C-T | 81  | chr13:10138550-10138650 |
| chr13 | 10217050 | 10217150 | 1065-Lng-A-T | 43  | chr13:10217050-10217150 |
| chr13 | 10223350 | 10223450 | 901-Lng-B-T  | 136 | chr13:10223350-10223450 |
| chr13 | 10263050 | 10263150 | 1152-Lng-A-T | 35  | chr13:10263050-10263150 |
| chr13 | 10354150 | 10354250 | 1188-Lng-A-T | 73  | chr13:10354150-10354250 |
| chr13 | 10458150 | 10458250 | 1152-Lng-A-T | 84  | chr13:10458150-10458250 |
| chr13 | 10478050 | 10478150 | 1152-Lng-A-T | 112 | chr13:10478050-10478150 |
| chr13 | 10493250 | 10493350 | 1090-Lng-A-T | 72  | chr13:10493250-10493350 |
| chr13 | 10572950 | 10573050 | 1223-Lng-B-T | 164 | chr13:10572950-10573050 |
| chr13 | 10579250 | 10579350 | 1004-Lng-A-T | 59  | chr13:10579250-10579350 |
| chr13 | 10650250 | 10650350 | 1188-Lng-A-T | 38  | chr13:10650250-10650350 |
| chr13 | 10797150 | 10797250 | 1274-Lng-A-T | 64  | chr13:10797150-10797250 |
| chr13 | 10874750 | 10874850 | 1004-Lng-A-T | 870 | chr13:10874750-10874850 |
| chr13 | 11911350 | 11911450 | 1090-Lng-A-T | 63  | chr13:11911350-11911450 |
| chr13 | 11911650 | 11911750 | 846-Lng-A-T  | 72  | chr13:11911650-11911750 |
| chr13 | 12065650 | 12065750 | 1100-Lng-A-T | 63  | chr13:12065650-12065750 |
| chr13 | 12161350 | 12161450 | 1274-Lng-A-T | 66  | chr13:12161350-12161450 |
| chr13 | 12391250 | 12391350 | 901-Lng-A-T  | 109 | chr13:12391250-12391350 |
| chr13 | 12531950 | 12532050 | 1188-Lng-A-T | 225 | chr13:12531950-12532050 |
| chr13 | 12647350 | 12647450 | 901-Lng-C-T  | 44  | chr13:12647350-12647450 |
| chr13 | 12696750 | 12696850 | 901-Lng-C-T  | 48  | chr13:12696750-12696850 |
| chr13 | 12698650 | 12698750 | 901-Lng-D-T  | 145 | chr13:12698650-12698750 |
| chr13 | 12864050 | 12864150 | 1152-Lng-A-T | 103 | chr13:12864050-12864150 |
| chr13 | 12905450 | 12905550 | 1152-Lng-A-T | 87  | chr13:12905450-12905550 |
| chr13 | 12905450 | 12905550 | 1065-Lng-A-T | 80  | chr13:12905450-12905550 |
| chr13 | 12913150 | 12913250 | 1065-Lng-C-T | 138 | chr13:12913150-12913250 |

**Table S2: SB Insertion regions**

|       |          |          |              |     |                         |
|-------|----------|----------|--------------|-----|-------------------------|
| chr13 | 12965750 | 12965850 | 901-Lng-C-T  | 65  | chr13:12965750-12965850 |
| chr13 | 13241850 | 13241950 | 1065-Lng-A-T | 63  | chr13:13241850-13241950 |
| chr13 | 13460750 | 13460850 | 1223-Lng-C-T | 45  | chr13:13460750-13460850 |
| chr13 | 13693850 | 13693950 | 1151-Lng-A-T | 90  | chr13:13693850-13693950 |
| chr13 | 13801450 | 13801550 | 1065-Lng-B-T | 54  | chr13:13801450-13801550 |
| chr13 | 13821550 | 13821650 | 1072-Lng-A-T | 156 | chr13:13821550-13821650 |
| chr13 | 14060050 | 14060150 | 1151-Lng-A-T | 292 | chr13:14060050-14060150 |
| chr13 | 14071850 | 14071950 | 1223-Lng-C-T | 121 | chr13:14071850-14071950 |
| chr13 | 14100250 | 14100350 | 1090-Lng-A-T | 68  | chr13:14100250-14100350 |
| chr13 | 14103650 | 14103750 | 1072-Lng-A-T | 458 | chr13:14103650-14103750 |
| chr13 | 14104350 | 14104450 | 1072-Lng-A-T | 73  | chr13:14104350-14104450 |
| chr13 | 14106750 | 14106850 | 1090-Lng-A-T | 58  | chr13:14106750-14106850 |
| chr13 | 14144750 | 14144850 | 1065-Lng-C-T | 86  | chr13:14144750-14144850 |
| chr13 | 14160150 | 14160250 | 1188-Lng-A-T | 46  | chr13:14160150-14160250 |
| chr13 | 14205050 | 14205150 | 1065-Lng-B-T | 42  | chr13:14205050-14205150 |
| chr13 | 14216450 | 14216550 | 901-Lng-D-T  | 37  | chr13:14216450-14216550 |
| chr13 | 14255350 | 14255450 | 1167-Lng-A-T | 98  | chr13:14255350-14255450 |
| chr13 | 14267150 | 14267250 | 1100-Lng-A-T | 69  | chr13:14267150-14267250 |
| chr13 | 14273150 | 14273250 | 901-Lng-B-T  | 241 | chr13:14273150-14273250 |
| chr13 | 14317950 | 14318050 | 1065-Lng-B-T | 55  | chr13:14317950-14318050 |
| chr13 | 14341950 | 14342050 | 901-Lng-A-T  | 97  | chr13:14341950-14342050 |
| chr13 | 14711950 | 14712050 | 1100-Lng-A-T | 153 | chr13:14711950-14712050 |
| chr13 | 14732450 | 14732550 | 1188-Lng-A-T | 130 | chr13:14732450-14732550 |
| chr13 | 15478850 | 15478950 | 901-Lng-B-T  | 74  | chr13:15478850-15478950 |
| chr13 | 15504850 | 15504950 | 1065-Lng-B-T | 44  | chr13:15504850-15504950 |
| chr13 | 15546850 | 15546950 | 901-Lng-B-T  | 146 | chr13:15546850-15546950 |
| chr13 | 15582450 | 15582550 | 1188-Lng-A-T | 64  | chr13:15582450-15582550 |
| chr13 | 15592450 | 15592550 | 1090-Lng-A-T | 74  | chr13:15592450-15592550 |
| chr13 | 15771250 | 15771350 | 901-Lng-C-T  | 32  | chr13:15771250-15771350 |
| chr13 | 15790050 | 15790150 | 901-Lng-A-T  | 61  | chr13:15790050-15790150 |
| chr13 | 15882350 | 15882450 | 1223-Lng-B-T | 256 | chr13:15882350-15882450 |
| chr13 | 16033650 | 16033750 | 1004-Lng-A-T | 66  | chr13:16033650-16033750 |
| chr13 | 16204050 | 16204150 | 1065-Lng-B-T | 61  | chr13:16204050-16204150 |
| chr13 | 16271350 | 16271450 | 1152-Lng-A-T | 57  | chr13:16271350-16271450 |
| chr13 | 16395850 | 16395950 | 901-Lng-A-T  | 105 | chr13:16395850-16395950 |
| chr13 | 16512250 | 16512350 | 1065-Lng-A-T | 45  | chr13:16512250-16512350 |
| chr13 | 16667250 | 16667350 | 1274-Lng-A-T | 63  | chr13:16667250-16667350 |
| chr13 | 16669450 | 16669550 | 1223-Lng-A-T | 166 | chr13:16669450-16669550 |
| chr13 | 16672050 | 16672150 | 1188-Lng-A-T | 35  | chr13:16672050-16672150 |
| chr13 | 16719650 | 16719750 | 1065-Lng-A-T | 59  | chr13:16719650-16719750 |
| chr13 | 16743150 | 16743250 | 1004-Lng-A-T | 901 | chr13:16743150-16743250 |
| chr13 | 16938050 | 16938150 | 1004-Lng-A-T | 105 | chr13:16938050-16938150 |
| chr13 | 16969450 | 16969550 | 1223-Lng-B-T | 144 | chr13:16969450-16969550 |
| chr13 | 17053250 | 17053350 | 1151-Lng-A-T | 346 | chr13:17053250-17053350 |
| chr13 | 17206450 | 17206550 | 901-Lng-B-T  | 87  | chr13:17206450-17206550 |
| chr13 | 17348750 | 17348850 | 901-Lng-A-T  | 51  | chr13:17348750-17348850 |

**Table S2: SB Insertion regions**

|       |          |          |              |     |                         |
|-------|----------|----------|--------------|-----|-------------------------|
| chr13 | 17428350 | 17428450 | 846-Lng-A-T  | 874 | chr13:17428350-17428450 |
| chr13 | 17587550 | 17587650 | 901-Lng-C-T  | 56  | chr13:17587550-17587650 |
| chr13 | 17600350 | 17600450 | 1090-Lng-A-T | 68  | chr13:17600350-17600450 |
| chr13 | 17639950 | 17640050 | 1223-Lng-B-T | 317 | chr13:17639950-17640050 |
| chr13 | 17785550 | 17785650 | 1004-Lng-A-T | 72  | chr13:17785550-17785650 |
| chr13 | 17794650 | 17794750 | 1090-Lng-A-T | 80  | chr13:17794650-17794750 |
| chr13 | 17806550 | 17806650 | 901-Lng-A-T  | 50  | chr13:17806550-17806650 |
| chr13 | 17807050 | 17807150 | 901-Lng-D-T  | 314 | chr13:17807050-17807150 |
| chr13 | 17826750 | 17826850 | 1151-Lng-A-T | 162 | chr13:17826750-17826850 |
| chr13 | 17832050 | 17832150 | 1223-Lng-C-T | 919 | chr13:17832050-17832150 |
| chr13 | 17843050 | 17843150 | 1065-Lng-A-T | 103 | chr13:17843050-17843150 |
| chr13 | 17855250 | 17855350 | 1223-Lng-B-T | 61  | chr13:17855250-17855350 |
| chr13 | 17857150 | 17857250 | 1100-Lng-A-T | 99  | chr13:17857150-17857250 |
| chr13 | 17870250 | 17870350 | 1065-Lng-C-T | 109 | chr13:17870250-17870350 |
| chr13 | 17880450 | 17880550 | 1065-Lng-C-T | 67  | chr13:17880450-17880550 |
| chr13 | 17884550 | 17884650 | 1152-Lng-A-T | 94  | chr13:17884550-17884650 |
| chr13 | 17884550 | 17884650 | 1152-Lng-A-T | 54  | chr13:17884550-17884650 |
| chr13 | 17969450 | 17969550 | 1072-Lng-A-T | 173 | chr13:17969450-17969550 |
| chr13 | 17994150 | 17994250 | 1274-Lng-A-T | 63  | chr13:17994150-17994250 |
| chr13 | 18019350 | 18019450 | 1223-Lng-C-T | 51  | chr13:18019350-18019450 |
| chr13 | 18019750 | 18019850 | 1100-Lng-A-T | 54  | chr13:18019750-18019850 |
| chr13 | 18021650 | 18021750 | 1065-Lng-B-T | 58  | chr13:18021650-18021750 |
| chr13 | 18200150 | 18200250 | 1065-Lng-A-T | 482 | chr13:18200150-18200250 |
| chr13 | 18448850 | 18448950 | 1065-Lng-B-T | 81  | chr13:18448850-18448950 |
| chr13 | 18502450 | 18502550 | 1004-Lng-A-T | 182 | chr13:18502450-18502550 |
| chr13 | 18513350 | 18513450 | 1065-Lng-C-T | 75  | chr13:18513350-18513450 |
| chr13 | 18574350 | 18574450 | 1065-Lng-A-T | 54  | chr13:18574350-18574450 |
| chr13 | 18678150 | 18678250 | 1065-Lng-B-T | 61  | chr13:18678150-18678250 |
| chr13 | 18700950 | 18701050 | 1065-Lng-A-T | 60  | chr13:18700950-18701050 |
| chr13 | 18821750 | 18821850 | 1223-Lng-B-T | 146 | chr13:18821750-18821850 |
| chr13 | 18834650 | 18834750 | 901-Lng-C-T  | 47  | chr13:18834650-18834750 |
| chr13 | 18881750 | 18881850 | 1223-Lng-B-T | 143 | chr13:18881750-18881850 |
| chr13 | 18887750 | 18887850 | 1004-Lng-A-T | 73  | chr13:18887750-18887850 |
| chr13 | 18905150 | 18905250 | 1274-Lng-A-T | 109 | chr13:18905150-18905250 |
| chr13 | 18973950 | 18974050 | 1223-Lng-C-T | 52  | chr13:18973950-18974050 |
| chr13 | 18999950 | 19000050 | 1152-Lng-A-T | 45  | chr13:18999950-19000050 |
| chr13 | 19723250 | 19723350 | 1065-Lng-A-T | 68  | chr13:19723250-19723350 |
| chr13 | 19752650 | 19752750 | 901-Lng-A-T  | 78  | chr13:19752650-19752750 |
| chr13 | 19994150 | 19994250 | 1065-Lng-A-T | 83  | chr13:19994150-19994250 |
| chr13 | 20083650 | 20083750 | 1223-Lng-A-T | 88  | chr13:20083650-20083750 |
| chr13 | 20362550 | 20362650 | 1188-Lng-A-T | 64  | chr13:20362550-20362650 |
| chr13 | 20482050 | 20482150 | 1065-Lng-B-T | 40  | chr13:20482050-20482150 |
| chr13 | 20817650 | 20817750 | 1065-Lng-B-T | 68  | chr13:20817650-20817750 |
| chr13 | 20894350 | 20894450 | 1065-Lng-B-T | 86  | chr13:20894350-20894450 |
| chr13 | 20907850 | 20907950 | 1065-Lng-C-T | 117 | chr13:20907850-20907950 |
| chr13 | 21010150 | 21010250 | 901-Lng-D-T  | 61  | chr13:21010150-21010250 |

**Table S2: SB Insertion regions**

|       |          |          |              |      |                         |
|-------|----------|----------|--------------|------|-------------------------|
| chr13 | 21144650 | 21144750 | 901-Lng-D-T  | 56   | chr13:21144650-21144750 |
| chr13 | 21278150 | 21278250 | 1065-Lng-A-T | 45   | chr13:21278150-21278250 |
| chr13 | 21758650 | 21758750 | 901-Lng-B-T  | 170  | chr13:21758650-21758750 |
| chr13 | 22266950 | 22267050 | 1072-Lng-A-T | 135  | chr13:22266950-22267050 |
| chr13 | 22504150 | 22504250 | 846-Lng-A-T  | 129  | chr13:22504150-22504250 |
| chr13 | 22534650 | 22534750 | 1065-Lng-B-T | 67   | chr13:22534650-22534750 |
| chr13 | 22618150 | 22618250 | 1151-Lng-A-T | 477  | chr13:22618150-22618250 |
| chr13 | 22781950 | 22782050 | 1072-Lng-A-T | 51   | chr13:22781950-22782050 |
| chr13 | 23160950 | 23161050 | 846-Lng-A-T  | 134  | chr13:23160950-23161050 |
| chr13 | 23175950 | 23176050 | 1065-Lng-B-T | 64   | chr13:23175950-23176050 |
| chr13 | 23254950 | 23255050 | 1065-Lng-B-T | 54   | chr13:23254950-23255050 |
| chr13 | 23447550 | 23447650 | 1065-Lng-B-T | 79   | chr13:23447550-23447650 |
| chr13 | 23451450 | 23451550 | 1223-Lng-D-T | 61   | chr13:23451450-23451550 |
| chr13 | 23592050 | 23592150 | 846-Lng-A-T  | 99   | chr13:23592050-23592150 |
| chr13 | 23720750 | 23720850 | 901-Lng-B-T  | 149  | chr13:23720750-23720850 |
| chr13 | 24022150 | 24022250 | 1065-Lng-A-T | 65   | chr13:24022150-24022250 |
| chr13 | 24105950 | 24106050 | 1223-Lng-A-T | 957  | chr13:24105950-24106050 |
| chr13 | 24170350 | 24170450 | 846-Lng-A-T  | 129  | chr13:24170350-24170450 |
| chr13 | 24203350 | 24203450 | 1004-Lng-A-T | 322  | chr13:24203350-24203450 |
| chr13 | 24221250 | 24221350 | 1274-Lng-A-T | 54   | chr13:24221250-24221350 |
| chr13 | 24249750 | 24249850 | 1223-Lng-A-T | 66   | chr13:24249750-24249850 |
| chr13 | 24282050 | 24282150 | 1004-Lng-A-T | 74   | chr13:24282050-24282150 |
| chr13 | 24324650 | 24324750 | 846-Lng-A-T  | 117  | chr13:24324650-24324750 |
| chr13 | 24342750 | 24342850 | 901-Lng-D-T  | 75   | chr13:24342750-24342850 |
| chr13 | 24659650 | 24659750 | 1065-Lng-A-T | 49   | chr13:24659650-24659750 |
| chr13 | 24733250 | 24733350 | 901-Lng-D-T  | 103  | chr13:24733250-24733350 |
| chr13 | 24839750 | 24839850 | 846-Lng-A-T  | 1801 | chr13:24839750-24839850 |
| chr13 | 24901650 | 24901750 | 1100-Lng-A-T | 55   | chr13:24901650-24901750 |
| chr13 | 24920950 | 24921050 | 1100-Lng-A-T | 111  | chr13:24920950-24921050 |
| chr13 | 25016850 | 25016950 | 901-Lng-A-T  | 272  | chr13:25016850-25016950 |
| chr13 | 25093950 | 25094050 | 1072-Lng-A-T | 156  | chr13:25093950-25094050 |
| chr13 | 25542050 | 25542150 | 846-Lng-A-T  | 42   | chr13:25542050-25542150 |
| chr13 | 25588750 | 25588850 | 1151-Lng-A-T | 64   | chr13:25588750-25588850 |
| chr13 | 25809450 | 25809550 | 1152-Lng-A-T | 219  | chr13:25809450-25809550 |
| chr13 | 25847350 | 25847450 | 1274-Lng-A-T | 54   | chr13:25847350-25847450 |
| chr13 | 26016550 | 26016650 | 1004-Lng-A-T | 78   | chr13:26016550-26016650 |
| chr13 | 26080650 | 26080750 | 901-Lng-C-T  | 69   | chr13:26080650-26080750 |
| chr13 | 26148250 | 26148350 | 901-Lng-C-T  | 35   | chr13:26148250-26148350 |
| chr13 | 26345250 | 26345350 | 1065-Lng-A-T | 90   | chr13:26345250-26345350 |
| chr13 | 26359750 | 26359850 | 901-Lng-B-T  | 156  | chr13:26359750-26359850 |
| chr13 | 26363050 | 26363150 | 901-Lng-A-T  | 67   | chr13:26363050-26363150 |
| chr13 | 26391250 | 26391350 | 1065-Lng-B-T | 44   | chr13:26391250-26391350 |
| chr13 | 26415050 | 26415150 | 1152-Lng-A-T | 257  | chr13:26415050-26415150 |
| chr13 | 26478950 | 26479050 | 1223-Lng-C-T | 45   | chr13:26478950-26479050 |
| chr13 | 26681550 | 26681650 | 1004-Lng-A-T | 78   | chr13:26681550-26681650 |
| chr13 | 26869150 | 26869250 | 1100-Lng-A-T | 145  | chr13:26869150-26869250 |

**Table S2: SB Insertion regions**

|       |          |          |              |      |                         |
|-------|----------|----------|--------------|------|-------------------------|
| chr13 | 26904150 | 26904250 | 1004-Lng-A-T | 53   | chr13:26904150-26904250 |
| chr13 | 26943850 | 26943950 | 1065-Lng-A-T | 41   | chr13:26943850-26943950 |
| chr13 | 27130850 | 27130950 | 1004-Lng-A-T | 66   | chr13:27130850-27130950 |
| chr13 | 27546350 | 27546450 | 1004-Lng-A-T | 82   | chr13:27546350-27546450 |
| chr13 | 27865950 | 27866050 | 1065-Lng-B-T | 42   | chr13:27865950-27866050 |
| chr13 | 28049450 | 28049550 | 1065-Lng-C-T | 79   | chr13:28049450-28049550 |
| chr13 | 28153450 | 28153550 | 1152-Lng-A-T | 57   | chr13:28153450-28153550 |
| chr13 | 28343450 | 28343550 | 1090-Lng-A-T | 1342 | chr13:28343450-28343550 |
| chr13 | 28437850 | 28437950 | 901-Lng-C-T  | 79   | chr13:28437850-28437950 |
| chr13 | 28446550 | 28446650 | 1004-Lng-A-T | 90   | chr13:28446550-28446650 |
| chr13 | 29152550 | 29152650 | 1100-Lng-A-T | 95   | chr13:29152550-29152650 |
| chr13 | 29239750 | 29239850 | 1090-Lng-A-T | 66   | chr13:29239750-29239850 |
| chr13 | 29414250 | 29414350 | 1223-Lng-B-T | 159  | chr13:29414250-29414350 |
| chr13 | 29477850 | 29477950 | 1223-Lng-D-T | 41   | chr13:29477850-29477950 |
| chr13 | 29498750 | 29498850 | 1090-Lng-B-T | 665  | chr13:29498750-29498850 |
| chr13 | 29535650 | 29535750 | 901-Lng-C-T  | 41   | chr13:29535650-29535750 |
| chr13 | 29665450 | 29665550 | 1065-Lng-A-T | 53   | chr13:29665450-29665550 |
| chr13 | 29716150 | 29716250 | 1090-Lng-B-T | 508  | chr13:29716150-29716250 |
| chr13 | 29727350 | 29727450 | 1065-Lng-B-T | 52   | chr13:29727350-29727450 |
| chr13 | 29736350 | 29736450 | 846-Lng-A-T  | 77   | chr13:29736350-29736450 |
| chr13 | 29826350 | 29826450 | 1274-Lng-A-T | 105  | chr13:29826350-29826450 |
| chr13 | 29835750 | 29835850 | 1090-Lng-A-T | 68   | chr13:29835750-29835850 |
| chr13 | 29893050 | 29893150 | 901-Lng-A-T  | 134  | chr13:29893050-29893150 |
| chr13 | 29898650 | 29898750 | 1151-Lng-A-T | 58   | chr13:29898650-29898750 |
| chr13 | 29928350 | 29928450 | 1167-Lng-A-T | 108  | chr13:29928350-29928450 |
| chr13 | 29943550 | 29943650 | 1004-Lng-A-T | 298  | chr13:29943550-29943650 |
| chr13 | 30016750 | 30016850 | 1065-Lng-B-T | 63   | chr13:30016750-30016850 |
| chr13 | 30031350 | 30031450 | 1223-Lng-D-T | 44   | chr13:30031350-30031450 |
| chr13 | 30247550 | 30247650 | 1065-Lng-B-T | 45   | chr13:30247550-30247650 |
| chr13 | 30295150 | 30295250 | 846-Lng-A-T  | 76   | chr13:30295150-30295250 |
| chr13 | 30309350 | 30309450 | 901-Lng-B-T  | 124  | chr13:30309350-30309450 |
| chr13 | 30434650 | 30434750 | 1152-Lng-A-T | 41   | chr13:30434650-30434750 |
| chr13 | 30452850 | 30452950 | 1151-Lng-A-T | 69   | chr13:30452850-30452950 |
| chr13 | 30506350 | 30506450 | 901-Lng-D-T  | 87   | chr13:30506350-30506450 |
| chr13 | 30535050 | 30535150 | 1100-Lng-A-T | 51   | chr13:30535050-30535150 |
| chr13 | 30630150 | 30630250 | 1223-Lng-B-T | 34   | chr13:30630150-30630250 |
| chr13 | 30745950 | 30746050 | 1004-Lng-A-T | 71   | chr13:30745950-30746050 |
| chr13 | 30958250 | 30958350 | 846-Lng-A-T  | 176  | chr13:30958250-30958350 |
| chr13 | 30960450 | 30960550 | 1090-Lng-B-T | 100  | chr13:30960450-30960550 |
| chr13 | 31003650 | 31003750 | 846-Lng-A-T  | 89   | chr13:31003650-31003750 |
| chr13 | 31007750 | 31007850 | 1004-Lng-A-T | 91   | chr13:31007750-31007850 |
| chr13 | 31037450 | 31037550 | 1065-Lng-A-T | 70   | chr13:31037450-31037550 |
| chr13 | 31037650 | 31037750 | 1065-Lng-B-T | 42   | chr13:31037650-31037750 |
| chr13 | 31054850 | 31054950 | 1223-Lng-D-T | 52   | chr13:31054850-31054950 |
| chr13 | 31503050 | 31503150 | 1004-Lng-A-T | 76   | chr13:31503050-31503150 |
| chr13 | 31719050 | 31719150 | 1167-Lng-A-T | 93   | chr13:31719050-31719150 |



**Table S2: SB Insertion regions**

|       |          |          |              |      |                         |
|-------|----------|----------|--------------|------|-------------------------|
| chr13 | 31719050 | 31719150 | 1223-Lng-C-T | 225  | chr13:31719050-31719150 |
| chr13 | 31719050 | 31719150 | 1100-Lng-A-T | 57   | chr13:31719050-31719150 |
| chr13 | 31719050 | 31719150 | 1100-Lng-B-T | 94   | chr13:31719050-31719150 |
| chr13 | 31719050 | 31719150 | 1151-Lng-A-T | 220  | chr13:31719050-31719150 |
| chr13 | 31719050 | 31719150 | 1223-Lng-D-T | 238  | chr13:31719050-31719150 |
| chr13 | 31719050 | 31719150 | 1090-Lng-B-T | 720  | chr13:31719050-31719150 |
| chr13 | 31719050 | 31719150 | 1223-Lng-A-T | 727  | chr13:31719050-31719150 |
| chr13 | 31719050 | 31719150 | 1223-Lng-B-T | 75   | chr13:31719050-31719150 |
| chr13 | 31719050 | 31719150 | 1152-Lng-A-T | 503  | chr13:31719050-31719150 |
| chr13 | 31719050 | 31719150 | 901-Lng-D-T  | 321  | chr13:31719050-31719150 |
| chr13 | 31719050 | 31719150 | 1274-Lng-A-T | 457  | chr13:31719050-31719150 |
| chr13 | 31719050 | 31719150 | 1100-Lng-A-T | 993  | chr13:31719050-31719150 |
| chr13 | 31719050 | 31719150 | 1223-Lng-C-T | 67   | chr13:31719050-31719150 |
| chr13 | 31719050 | 31719150 | 901-Lng-C-T  | 106  | chr13:31719050-31719150 |
| chr13 | 31719050 | 31719150 | 1090-Lng-B-T | 645  | chr13:31719050-31719150 |
| chr13 | 31719050 | 31719150 | 1223-Lng-D-T | 51   | chr13:31719050-31719150 |
| chr13 | 31719050 | 31719150 | 1223-Lng-B-T | 60   | chr13:31719050-31719150 |
| chr13 | 31719050 | 31719150 | 1090-Lng-A-T | 985  | chr13:31719050-31719150 |
| chr13 | 31719150 | 31719250 | 1223-Lng-C-T | 173  | chr13:31719150-31719250 |
| chr13 | 31719150 | 31719250 | 1100-Lng-A-T | 145  | chr13:31719150-31719250 |
| chr13 | 31719150 | 31719250 | 1090-Lng-B-T | 547  | chr13:31719150-31719250 |
| chr13 | 31719150 | 31719250 | 1223-Lng-B-T | 110  | chr13:31719150-31719250 |
| chr13 | 31719150 | 31719250 | 1090-Lng-A-T | 1155 | chr13:31719150-31719250 |
| chr13 | 31719150 | 31719250 | 1167-Lng-A-T | 144  | chr13:31719150-31719250 |
| chr13 | 31719150 | 31719250 | 1223-Lng-C-T | 60   | chr13:31719150-31719250 |
| chr13 | 31719150 | 31719250 | 1151-Lng-A-T | 154  | chr13:31719150-31719250 |
| chr13 | 31719150 | 31719250 | 1223-Lng-D-T | 144  | chr13:31719150-31719250 |
| chr13 | 31719150 | 31719250 | 1223-Lng-B-T | 295  | chr13:31719150-31719250 |
| chr13 | 31719150 | 31719250 | 1152-Lng-A-T | 280  | chr13:31719150-31719250 |
| chr13 | 31825850 | 31825950 | 1065-Lng-B-T | 77   | chr13:31825850-31825950 |
| chr13 | 32074950 | 32075050 | 901-Lng-C-T  | 71   | chr13:32074950-32075050 |
| chr13 | 32099350 | 32099450 | 1065-Lng-A-T | 37   | chr13:32099350-32099450 |
| chr13 | 32110550 | 32110650 | 901-Lng-A-T  | 153  | chr13:32110550-32110650 |
| chr13 | 32125550 | 32125650 | 1065-Lng-B-T | 65   | chr13:32125550-32125650 |
| chr13 | 32330450 | 32330550 | 1274-Lng-A-T | 79   | chr13:32330450-32330550 |
| chr13 | 32648750 | 32648850 | 901-Lng-B-T  | 233  | chr13:32648750-32648850 |
| chr13 | 32864750 | 32864850 | 1065-Lng-A-T | 44   | chr13:32864750-32864850 |
| chr13 | 33031150 | 33031250 | 901-Lng-C-T  | 51   | chr13:33031150-33031250 |
| chr13 | 33059350 | 33059450 | 1004-Lng-A-T | 77   | chr13:33059350-33059450 |
| chr13 | 33067750 | 33067850 | 1167-Lng-A-T | 69   | chr13:33067750-33067850 |
| chr13 | 33071650 | 33071750 | 1065-Lng-B-T | 44   | chr13:33071650-33071750 |
| chr13 | 33098550 | 33098650 | 846-Lng-A-T  | 150  | chr13:33098550-33098650 |
| chr13 | 33346250 | 33346350 | 1004-Lng-A-T | 60   | chr13:33346250-33346350 |
| chr13 | 34024250 | 34024350 | 1167-Lng-A-T | 90   | chr13:34024250-34024350 |
| chr13 | 34029350 | 34029450 | 1004-Lng-A-T | 94   | chr13:34029350-34029450 |
| chr13 | 34061650 | 34061750 | 1151-Lng-A-T | 476  | chr13:34061650-34061750 |

**Table S2: SB Insertion regions**

|       |          |          |              |      |                         |
|-------|----------|----------|--------------|------|-------------------------|
| chr13 | 34062450 | 34062550 | 1151-Lng-A-T | 9860 | chr13:34062450-34062550 |
| chr13 | 34072050 | 34072150 | 1223-Lng-A-T | 125  | chr13:34072050-34072150 |
| chr13 | 34133450 | 34133550 | 901-Lng-C-T  | 38   | chr13:34133450-34133550 |
| chr13 | 34149950 | 34150050 | 1274-Lng-A-T | 62   | chr13:34149950-34150050 |
| chr13 | 34299950 | 34300050 | 901-Lng-B-T  | 117  | chr13:34299950-34300050 |
| chr13 | 34373150 | 34373250 | 846-Lng-A-T  | 165  | chr13:34373150-34373250 |
| chr13 | 34381350 | 34381450 | 1100-Lng-A-T | 69   | chr13:34381350-34381450 |
| chr13 | 34411750 | 34411850 | 901-Lng-A-T  | 180  | chr13:34411750-34411850 |
| chr13 | 34415550 | 34415650 | 901-Lng-B-T  | 131  | chr13:34415550-34415650 |
| chr13 | 34475450 | 34475550 | 1274-Lng-A-T | 141  | chr13:34475450-34475550 |
| chr13 | 34536550 | 34536650 | 1223-Lng-C-T | 50   | chr13:34536550-34536650 |
| chr13 | 34646050 | 34646150 | 1223-Lng-B-T | 80   | chr13:34646050-34646150 |
| chr13 | 34800850 | 34800950 | 1100-Lng-A-T | 103  | chr13:34800850-34800950 |
| chr13 | 34977850 | 34977950 | 1090-Lng-A-T | 47   | chr13:34977850-34977950 |
| chr13 | 35495150 | 35495250 | 1223-Lng-C-T | 56   | chr13:35495150-35495250 |
| chr13 | 35572950 | 35573050 | 1152-Lng-A-T | 44   | chr13:35572950-35573050 |
| chr13 | 35828050 | 35828150 | 1065-Lng-C-T | 366  | chr13:35828050-35828150 |
| chr13 | 35835350 | 35835450 | 901-Lng-C-T  | 64   | chr13:35835350-35835450 |
| chr13 | 35843650 | 35843750 | 1151-Lng-A-T | 55   | chr13:35843650-35843750 |
| chr13 | 35941450 | 35941550 | 1065-Lng-B-T | 66   | chr13:35941450-35941550 |
| chr13 | 35973450 | 35973550 | 1090-Lng-A-T | 126  | chr13:35973450-35973550 |
| chr13 | 35982450 | 35982550 | 1065-Lng-C-T | 69   | chr13:35982450-35982550 |
| chr13 | 36106350 | 36106450 | 901-Lng-D-T  | 144  | chr13:36106350-36106450 |
| chr13 | 36108650 | 36108750 | 901-Lng-D-T  | 168  | chr13:36108650-36108750 |
| chr13 | 36119150 | 36119250 | 1223-Lng-C-T | 43   | chr13:36119150-36119250 |
| chr13 | 36193250 | 36193350 | 901-Lng-D-T  | 287  | chr13:36193250-36193350 |
| chr13 | 36208450 | 36208550 | 901-Lng-A-T  | 171  | chr13:36208450-36208550 |
| chr13 | 36290750 | 36290850 | 1152-Lng-A-T | 43   | chr13:36290750-36290850 |
| chr13 | 36311450 | 36311550 | 1152-Lng-A-T | 133  | chr13:36311450-36311550 |
| chr13 | 36339150 | 36339250 | 1274-Lng-A-T | 61   | chr13:36339150-36339250 |
| chr13 | 36395150 | 36395250 | 1223-Lng-A-T | 1037 | chr13:36395150-36395250 |
| chr13 | 36532750 | 36532850 | 1090-Lng-A-T | 94   | chr13:36532750-36532850 |
| chr13 | 36558250 | 36558350 | 1072-Lng-A-T | 85   | chr13:36558250-36558350 |
| chr13 | 36585050 | 36585150 | 901-Lng-C-T  | 54   | chr13:36585050-36585150 |
| chr13 | 36737150 | 36737250 | 1188-Lng-A-T | 214  | chr13:36737150-36737250 |
| chr13 | 36746050 | 36746150 | 1100-Lng-A-T | 64   | chr13:36746050-36746150 |
| chr13 | 36773150 | 36773250 | 1090-Lng-B-T | 362  | chr13:36773150-36773250 |
| chr13 | 36788850 | 36788950 | 1065-Lng-B-T | 49   | chr13:36788850-36788950 |
| chr13 | 36950850 | 36950950 | 1223-Lng-A-T | 117  | chr13:36950850-36950950 |
| chr13 | 37056850 | 37056950 | 1188-Lng-A-T | 240  | chr13:37056850-37056950 |
| chr13 | 37106750 | 37106850 | 901-Lng-C-T  | 37   | chr13:37106750-37106850 |
| chr13 | 37155050 | 37155150 | 1090-Lng-B-T | 228  | chr13:37155050-37155150 |
| chr13 | 37170350 | 37170450 | 1151-Lng-A-T | 61   | chr13:37170350-37170450 |
| chr13 | 37215650 | 37215750 | 1274-Lng-A-T | 53   | chr13:37215650-37215750 |
| chr13 | 37244750 | 37244850 | 1223-Lng-B-T | 52   | chr13:37244750-37244850 |
| chr13 | 37334750 | 37334850 | 1167-Lng-A-T | 74   | chr13:37334750-37334850 |

**Table S2: SB Insertion regions**

|       |          |          |              |     |                         |
|-------|----------|----------|--------------|-----|-------------------------|
| chr13 | 37519050 | 37519150 | 1090-Lng-A-T | 45  | chr13:37519050-37519150 |
| chr13 | 37578450 | 37578550 | 1065-Lng-B-T | 48  | chr13:37578450-37578550 |
| chr13 | 37691250 | 37691350 | 1065-Lng-C-T | 71  | chr13:37691250-37691350 |
| chr13 | 37934150 | 37934250 | 901-Lng-C-T  | 86  | chr13:37934150-37934250 |
| chr13 | 37953650 | 37953750 | 1065-Lng-C-T | 71  | chr13:37953650-37953750 |
| chr13 | 38067950 | 38068050 | 1004-Lng-A-T | 566 | chr13:38067950-38068050 |
| chr13 | 38247150 | 38247250 | 1004-Lng-A-T | 115 | chr13:38247150-38247250 |
| chr13 | 38305450 | 38305550 | 1167-Lng-A-T | 58  | chr13:38305450-38305550 |
| chr13 | 38365150 | 38365250 | 1223-Lng-C-T | 43  | chr13:38365150-38365250 |
| chr13 | 38373250 | 38373350 | 1065-Lng-A-T | 94  | chr13:38373250-38373350 |
| chr13 | 38595750 | 38595850 | 846-Lng-A-T  | 135 | chr13:38595750-38595850 |
| chr13 | 38712050 | 38712150 | 1004-Lng-A-T | 52  | chr13:38712050-38712150 |
| chr13 | 38751850 | 38751950 | 1065-Lng-A-T | 38  | chr13:38751850-38751950 |
| chr13 | 38944650 | 38944750 | 1065-Lng-A-T | 88  | chr13:38944650-38944750 |
| chr13 | 39020250 | 39020350 | 1004-Lng-A-T | 116 | chr13:39020250-39020350 |
| chr13 | 39048850 | 39048950 | 1072-Lng-A-T | 154 | chr13:39048850-39048950 |
| chr13 | 39254250 | 39254350 | 1223-Lng-C-T | 47  | chr13:39254250-39254350 |
| chr13 | 39322650 | 39322750 | 1065-Lng-B-T | 46  | chr13:39322650-39322750 |
| chr13 | 39507950 | 39508050 | 1152-Lng-A-T | 217 | chr13:39507950-39508050 |
| chr13 | 39545950 | 39546050 | 901-Lng-D-T  | 117 | chr13:39545950-39546050 |
| chr13 | 39716150 | 39716250 | 1100-Lng-A-T | 100 | chr13:39716150-39716250 |
| chr13 | 39926350 | 39926450 | 1152-Lng-A-T | 252 | chr13:39926350-39926450 |
| chr13 | 40018950 | 40019050 | 1065-Lng-C-T | 128 | chr13:40018950-40019050 |
| chr13 | 40177550 | 40177650 | 1065-Lng-A-T | 87  | chr13:40177550-40177650 |
| chr13 | 40202650 | 40202750 | 901-Lng-A-T  | 133 | chr13:40202650-40202750 |
| chr13 | 40353250 | 40353350 | 846-Lng-A-T  | 429 | chr13:40353250-40353350 |
| chr13 | 40403150 | 40403250 | 1223-Lng-C-T | 57  | chr13:40403150-40403250 |
| chr13 | 40431750 | 40431850 | 1065-Lng-B-T | 43  | chr13:40431750-40431850 |
| chr13 | 40459850 | 40459950 | 1274-Lng-A-T | 89  | chr13:40459850-40459950 |
| chr13 | 40805350 | 40805450 | 1152-Lng-A-T | 62  | chr13:40805350-40805450 |
| chr13 | 41084350 | 41084450 | 1223-Lng-C-T | 44  | chr13:41084350-41084450 |
| chr13 | 41302550 | 41302650 | 901-Lng-A-T  | 77  | chr13:41302550-41302650 |
| chr13 | 41446450 | 41446550 | 901-Lng-A-T  | 58  | chr13:41446450-41446550 |
| chr13 | 41463150 | 41463250 | 1065-Lng-B-T | 121 | chr13:41463150-41463250 |
| chr13 | 41585550 | 41585650 | 1065-Lng-C-T | 69  | chr13:41585550-41585650 |
| chr13 | 41719750 | 41719850 | 1065-Lng-B-T | 52  | chr13:41719750-41719850 |
| chr13 | 41732250 | 41732350 | 901-Lng-B-T  | 55  | chr13:41732250-41732350 |
| chr13 | 42126150 | 42126250 | 1065-Lng-A-T | 53  | chr13:42126150-42126250 |
| chr13 | 42194150 | 42194250 | 1167-Lng-A-T | 138 | chr13:42194150-42194250 |
| chr13 | 42337350 | 42337450 | 1100-Lng-A-T | 145 | chr13:42337350-42337450 |
| chr13 | 42418650 | 42418750 | 901-Lng-A-T  | 75  | chr13:42418650-42418750 |
| chr13 | 42432050 | 42432150 | 1065-Lng-B-T | 65  | chr13:42432050-42432150 |
| chr13 | 42557250 | 42557350 | 846-Lng-A-T  | 115 | chr13:42557250-42557350 |
| chr13 | 42580250 | 42580350 | 1004-Lng-A-T | 106 | chr13:42580250-42580350 |
| chr13 | 42603450 | 42603550 | 1188-Lng-A-T | 37  | chr13:42603450-42603550 |
| chr13 | 42657350 | 42657450 | 1274-Lng-A-T | 117 | chr13:42657350-42657450 |

**Table S2: SB Insertion regions**

|       |          |          |              |      |                         |
|-------|----------|----------|--------------|------|-------------------------|
| chr13 | 42959550 | 42959650 | 1188-Lng-A-T | 42   | chr13:42959550-42959650 |
| chr13 | 43159750 | 43159850 | 1274-Lng-A-T | 160  | chr13:43159750-43159850 |
| chr13 | 43246250 | 43246350 | 1151-Lng-A-T | 91   | chr13:43246250-43246350 |
| chr13 | 43404350 | 43404450 | 1090-Lng-B-T | 116  | chr13:43404350-43404450 |
| chr13 | 43498850 | 43498950 | 1223-Lng-B-T | 278  | chr13:43498850-43498950 |
| chr13 | 43501350 | 43501450 | 1100-Lng-A-T | 77   | chr13:43501350-43501450 |
| chr13 | 43512450 | 43512550 | 1065-Lng-C-T | 151  | chr13:43512450-43512550 |
| chr13 | 43514850 | 43514950 | 1090-Lng-A-T | 67   | chr13:43514850-43514950 |
| chr13 | 43526450 | 43526550 | 901-Lng-C-T  | 31   | chr13:43526450-43526550 |
| chr13 | 43527650 | 43527750 | 1065-Lng-B-T | 220  | chr13:43527650-43527750 |
| chr13 | 44145350 | 44145450 | 1065-Lng-B-T | 66   | chr13:44145350-44145450 |
| chr13 | 44473850 | 44473950 | 1065-Lng-C-T | 62   | chr13:44473850-44473950 |
| chr13 | 44698150 | 44698250 | 1072-Lng-A-T | 61   | chr13:44698150-44698250 |
| chr13 | 44841750 | 44841850 | 846-Lng-A-T  | 212  | chr13:44841750-44841850 |
| chr13 | 44866450 | 44866550 | 1223-Lng-B-T | 271  | chr13:44866450-44866550 |
| chr13 | 44867350 | 44867450 | 1274-Lng-A-T | 89   | chr13:44867350-44867450 |
| chr13 | 44884350 | 44884450 | 1274-Lng-A-T | 71   | chr13:44884350-44884450 |
| chr13 | 44914450 | 44914550 | 1167-Lng-A-T | 114  | chr13:44914450-44914550 |
| chr13 | 44995550 | 44995650 | 1090-Lng-A-T | 57   | chr13:44995550-44995650 |
| chr13 | 45026450 | 45026550 | 1188-Lng-A-T | 7766 | chr13:45026450-45026550 |
| chr13 | 45066150 | 45066250 | 901-Lng-A-T  | 52   | chr13:45066150-45066250 |
| chr13 | 45462150 | 45462250 | 1065-Lng-A-T | 49   | chr13:45462150-45462250 |
| chr13 | 45668150 | 45668250 | 1167-Lng-A-T | 96   | chr13:45668150-45668250 |
| chr13 | 45753250 | 45753350 | 1274-Lng-A-T | 119  | chr13:45753250-45753350 |
| chr13 | 45781150 | 45781250 | 1151-Lng-A-T | 306  | chr13:45781150-45781250 |
| chr13 | 45827850 | 45827950 | 1188-Lng-A-T | 68   | chr13:45827850-45827950 |
| chr13 | 45837850 | 45837950 | 1167-Lng-A-T | 172  | chr13:45837850-45837950 |
| chr13 | 45847350 | 45847450 | 1100-Lng-A-T | 54   | chr13:45847350-45847450 |
| chr13 | 45889150 | 45889250 | 1274-Lng-A-T | 83   | chr13:45889150-45889250 |
| chr13 | 45908050 | 45908150 | 1152-Lng-A-T | 115  | chr13:45908050-45908150 |
| chr13 | 45962250 | 45962350 | 901-Lng-C-T  | 61   | chr13:45962250-45962350 |
| chr13 | 45963750 | 45963850 | 1065-Lng-C-T | 84   | chr13:45963750-45963850 |
| chr13 | 46028750 | 46028850 | 1100-Lng-A-T | 53   | chr13:46028750-46028850 |
| chr13 | 46292650 | 46292750 | 1004-Lng-A-T | 112  | chr13:46292650-46292750 |
| chr13 | 46724550 | 46724650 | 1223-Lng-B-T | 117  | chr13:46724550-46724650 |
| chr13 | 46800650 | 46800750 | 846-Lng-A-T  | 96   | chr13:46800650-46800750 |
| chr13 | 46875350 | 46875450 | 1065-Lng-B-T | 72   | chr13:46875350-46875450 |
| chr13 | 46880050 | 46880150 | 901-Lng-D-T  | 162  | chr13:46880050-46880150 |
| chr13 | 46955650 | 46955750 | 1065-Lng-A-T | 46   | chr13:46955650-46955750 |
| chr13 | 46982550 | 46982650 | 1223-Lng-B-T | 40   | chr13:46982550-46982650 |
| chr13 | 46997850 | 46997950 | 1065-Lng-B-T | 61   | chr13:46997850-46997950 |
| chr13 | 47066050 | 47066150 | 1065-Lng-B-T | 48   | chr13:47066050-47066150 |
| chr13 | 47179350 | 47179450 | 901-Lng-D-T  | 238  | chr13:47179350-47179450 |
| chr13 | 47285450 | 47285550 | 1188-Lng-A-T | 122  | chr13:47285450-47285550 |
| chr13 | 47318250 | 47318350 | 901-Lng-C-T  | 34   | chr13:47318250-47318350 |
| chr13 | 47756450 | 47756550 | 1152-Lng-A-T | 232  | chr13:47756450-47756550 |

**Table S2: SB Insertion regions**

|       |          |          |              |     |                         |
|-------|----------|----------|--------------|-----|-------------------------|
| chr13 | 47819950 | 47820050 | 1072-Lng-A-T | 78  | chr13:47819950-47820050 |
| chr13 | 47880550 | 47880650 | 1274-Lng-A-T | 233 | chr13:47880550-47880650 |
| chr13 | 47883850 | 47883950 | 1167-Lng-A-T | 56  | chr13:47883850-47883950 |
| chr13 | 48013150 | 48013250 | 901-Lng-B-T  | 111 | chr13:48013150-48013250 |
| chr13 | 48134350 | 48134450 | 1151-Lng-A-T | 56  | chr13:48134350-48134450 |
| chr13 | 48627850 | 48627950 | 1090-Lng-A-T | 50  | chr13:48627850-48627950 |
| chr13 | 48628750 | 48628850 | 1223-Lng-D-T | 43  | chr13:48628750-48628850 |
| chr13 | 48634050 | 48634150 | 1100-Lng-A-T | 78  | chr13:48634050-48634150 |
| chr13 | 48635650 | 48635750 | 1167-Lng-A-T | 96  | chr13:48635650-48635750 |
| chr13 | 48730750 | 48730850 | 1072-Lng-A-T | 51  | chr13:48730750-48730850 |
| chr13 | 48934250 | 48934350 | 1152-Lng-A-T | 473 | chr13:48934250-48934350 |
| chr13 | 48939450 | 48939550 | 1151-Lng-A-T | 67  | chr13:48939450-48939550 |
| chr13 | 48952050 | 48952150 | 1065-Lng-B-T | 76  | chr13:48952050-48952150 |
| chr13 | 48958450 | 48958550 | 1065-Lng-B-T | 61  | chr13:48958450-48958550 |
| chr13 | 48980250 | 48980350 | 1274-Lng-A-T | 170 | chr13:48980250-48980350 |
| chr13 | 48994450 | 48994550 | 1065-Lng-A-T | 59  | chr13:48994450-48994550 |
| chr13 | 49006550 | 49006650 | 1065-Lng-A-T | 72  | chr13:49006550-49006650 |
| chr13 | 49008850 | 49008950 | 1274-Lng-A-T | 56  | chr13:49008850-49008950 |
| chr13 | 49012150 | 49012250 | 901-Lng-A-T  | 373 | chr13:49012150-49012250 |
| chr13 | 49015750 | 49015850 | 1065-Lng-A-T | 65  | chr13:49015750-49015850 |
| chr13 | 49043350 | 49043450 | 1065-Lng-A-T | 51  | chr13:49043350-49043450 |
| chr13 | 49048850 | 49048950 | 1072-Lng-A-T | 129 | chr13:49048850-49048950 |
| chr13 | 49049750 | 49049850 | 901-Lng-A-T  | 261 | chr13:49049750-49049850 |
| chr13 | 49132350 | 49132450 | 1167-Lng-A-T | 136 | chr13:49132350-49132450 |
| chr13 | 49378650 | 49378750 | 1065-Lng-B-T | 61  | chr13:49378650-49378750 |
| chr13 | 49534550 | 49534650 | 1274-Lng-A-T | 210 | chr13:49534550-49534650 |
| chr13 | 49550450 | 49550550 | 1151-Lng-A-T | 72  | chr13:49550450-49550550 |
| chr13 | 49778350 | 49778450 | 1151-Lng-A-T | 73  | chr13:49778350-49778450 |
| chr13 | 49956250 | 49956350 | 901-Lng-B-T  | 145 | chr13:49956250-49956350 |
| chr13 | 50684350 | 50684450 | 1090-Lng-B-T | 361 | chr13:50684350-50684450 |
| chr13 | 51215850 | 51215950 | 1223-Lng-A-T | 58  | chr13:51215850-51215950 |
| chr13 | 51239250 | 51239350 | 1223-Lng-A-T | 174 | chr13:51239250-51239350 |
| chr13 | 51538850 | 51538950 | 1065-Lng-A-T | 56  | chr13:51538850-51538950 |
| chr13 | 51792650 | 51792750 | 1065-Lng-A-T | 69  | chr13:51792650-51792750 |
| chr13 | 51813450 | 51813550 | 1188-Lng-A-T | 37  | chr13:51813450-51813550 |
| chr13 | 51950750 | 51950850 | 1223-Lng-A-T | 78  | chr13:51950750-51950850 |
| chr13 | 51990250 | 51990350 | 1100-Lng-A-T | 142 | chr13:51990250-51990350 |
| chr13 | 52023350 | 52023450 | 1152-Lng-A-T | 67  | chr13:52023350-52023450 |
| chr13 | 52190750 | 52190850 | 1188-Lng-A-T | 42  | chr13:52190750-52190850 |
| chr13 | 52284050 | 52284150 | 1072-Lng-A-T | 50  | chr13:52284050-52284150 |
| chr13 | 52677750 | 52677850 | 901-Lng-C-T  | 34  | chr13:52677750-52677850 |
| chr13 | 52759050 | 52759150 | 901-Lng-B-T  | 181 | chr13:52759050-52759150 |
| chr13 | 52772050 | 52772150 | 901-Lng-B-T  | 192 | chr13:52772050-52772150 |
| chr13 | 52902850 | 52902950 | 1188-Lng-A-T | 141 | chr13:52902850-52902950 |
| chr13 | 53009750 | 53009850 | 1223-Lng-B-T | 38  | chr13:53009750-53009850 |
| chr13 | 53028250 | 53028350 | 1188-Lng-A-T | 47  | chr13:53028250-53028350 |

**Table S2: SB Insertion regions**

|       |          |          |              |     |                         |
|-------|----------|----------|--------------|-----|-------------------------|
| chr13 | 53058250 | 53058350 | 1065-Lng-A-T | 44  | chr13:53058250-53058350 |
| chr13 | 53101450 | 53101550 | 1151-Lng-A-T | 146 | chr13:53101450-53101550 |
| chr13 | 53315650 | 53315750 | 1167-Lng-A-T | 82  | chr13:53315650-53315750 |
| chr13 | 53484450 | 53484550 | 1065-Lng-C-T | 62  | chr13:53484450-53484550 |
| chr13 | 53657850 | 53657950 | 1065-Lng-A-T | 42  | chr13:53657850-53657950 |
| chr13 | 53864150 | 53864250 | 901-Lng-B-T  | 59  | chr13:53864150-53864250 |
| chr13 | 53969850 | 53969950 | 1223-Lng-B-T | 42  | chr13:53969850-53969950 |
| chr13 | 54074950 | 54075050 | 1065-Lng-C-T | 72  | chr13:54074950-54075050 |
| chr13 | 54179250 | 54179350 | 1223-Lng-C-T | 44  | chr13:54179250-54179350 |
| chr13 | 54189550 | 54189650 | 1065-Lng-A-T | 41  | chr13:54189550-54189650 |
| chr13 | 54367750 | 54367850 | 1151-Lng-A-T | 77  | chr13:54367750-54367850 |
| chr13 | 54399450 | 54399550 | 901-Lng-A-T  | 161 | chr13:54399450-54399550 |
| chr13 | 54650150 | 54650250 | 1223-Lng-C-T | 60  | chr13:54650150-54650250 |
| chr13 | 54729250 | 54729350 | 1223-Lng-C-T | 204 | chr13:54729250-54729350 |
| chr13 | 54746650 | 54746750 | 1223-Lng-A-T | 126 | chr13:54746650-54746750 |
| chr13 | 54777650 | 54777750 | 901-Lng-C-T  | 71  | chr13:54777650-54777750 |
| chr13 | 54779350 | 54779450 | 1090-Lng-B-T | 461 | chr13:54779350-54779450 |
| chr13 | 55147150 | 55147250 | 1004-Lng-A-T | 337 | chr13:55147150-55147250 |
| chr13 | 55249250 | 55249350 | 1223-Lng-B-T | 40  | chr13:55249250-55249350 |
| chr13 | 55326950 | 55327050 | 1152-Lng-A-T | 481 | chr13:55326950-55327050 |
| chr13 | 55345350 | 55345450 | 1152-Lng-A-T | 194 | chr13:55345350-55345450 |
| chr13 | 55356450 | 55356550 | 1152-Lng-A-T | 118 | chr13:55356450-55356550 |
| chr13 | 55381150 | 55381250 | 1065-Lng-B-T | 47  | chr13:55381150-55381250 |
| chr13 | 55404050 | 55404150 | 1100-Lng-A-T | 111 | chr13:55404050-55404150 |
| chr13 | 55552750 | 55552850 | 1223-Lng-A-T | 117 | chr13:55552750-55552850 |
| chr13 | 55676050 | 55676150 | 901-Lng-C-T  | 30  | chr13:55676050-55676150 |
| chr13 | 55709850 | 55709950 | 1004-Lng-A-T | 65  | chr13:55709850-55709950 |
| chr13 | 55746350 | 55746450 | 1167-Lng-A-T | 113 | chr13:55746350-55746450 |
| chr13 | 55769450 | 55769550 | 901-Lng-A-T  | 109 | chr13:55769450-55769550 |
| chr13 | 56072850 | 56072950 | 1065-Lng-A-T | 197 | chr13:56072850-56072950 |
| chr13 | 56694650 | 56694750 | 1065-Lng-B-T | 86  | chr13:56694650-56694750 |
| chr13 | 56750350 | 56750450 | 1072-Lng-A-T | 48  | chr13:56750350-56750450 |
| chr13 | 56808750 | 56808850 | 901-Lng-A-T  | 94  | chr13:56808750-56808850 |
| chr13 | 56829250 | 56829350 | 1072-Lng-A-T | 70  | chr13:56829250-56829350 |
| chr13 | 56870650 | 56870750 | 1274-Lng-A-T | 74  | chr13:56870650-56870750 |
| chr13 | 56981650 | 56981750 | 901-Lng-C-T  | 56  | chr13:56981650-56981750 |
| chr13 | 57065450 | 57065550 | 1065-Lng-A-T | 58  | chr13:57065450-57065550 |
| chr13 | 57183850 | 57183950 | 1004-Lng-A-T | 52  | chr13:57183850-57183950 |
| chr13 | 57374150 | 57374250 | 1065-Lng-C-T | 62  | chr13:57374150-57374250 |
| chr13 | 57400050 | 57400150 | 1274-Lng-A-T | 65  | chr13:57400050-57400150 |
| chr13 | 57920550 | 57920650 | 1065-Lng-A-T | 59  | chr13:57920550-57920650 |
| chr13 | 58182350 | 58182450 | 1223-Lng-C-T | 47  | chr13:58182350-58182450 |
| chr13 | 58306150 | 58306250 | 1004-Lng-A-T | 947 | chr13:58306150-58306250 |
| chr13 | 58347950 | 58348050 | 1223-Lng-D-T | 56  | chr13:58347950-58348050 |
| chr13 | 58515150 | 58515250 | 1152-Lng-A-T | 39  | chr13:58515150-58515250 |
| chr13 | 59274250 | 59274350 | 1090-Lng-A-T | 72  | chr13:59274250-59274350 |

**Table S2: SB Insertion regions**

|       |          |          |              |     |                         |
|-------|----------|----------|--------------|-----|-------------------------|
| chr13 | 59543950 | 59544050 | 1100-Lng-A-T | 70  | chr13:59543950-59544050 |
| chr13 | 59775050 | 59775150 | 1100-Lng-A-T | 133 | chr13:59775050-59775150 |
| chr13 | 59901950 | 59902050 | 1065-Lng-B-T | 41  | chr13:59901950-59902050 |
| chr13 | 59919650 | 59919750 | 1004-Lng-A-T | 57  | chr13:59919650-59919750 |
| chr13 | 60081550 | 60081650 | 1065-Lng-B-T | 47  | chr13:60081550-60081650 |
| chr13 | 60405850 | 60405950 | 1090-Lng-A-T | 57  | chr13:60405850-60405950 |
| chr13 | 60556350 | 60556450 | 1004-Lng-A-T | 65  | chr13:60556350-60556450 |
| chr13 | 60570550 | 60570650 | 846-Lng-A-T  | 68  | chr13:60570550-60570650 |
| chr13 | 60714250 | 60714350 | 1100-Lng-A-T | 61  | chr13:60714250-60714350 |
| chr13 | 60726450 | 60726550 | 1223-Lng-A-T | 181 | chr13:60726450-60726550 |
| chr13 | 60740350 | 60740450 | 1004-Lng-A-T | 411 | chr13:60740350-60740450 |
| chr13 | 60809750 | 60809850 | 1274-Lng-A-T | 154 | chr13:60809750-60809850 |
| chr13 | 60849350 | 60849450 | 1152-Lng-A-T | 97  | chr13:60849350-60849450 |
| chr13 | 60944450 | 60944550 | 846-Lng-A-T  | 130 | chr13:60944450-60944550 |
| chr13 | 61111750 | 61111850 | 1100-Lng-A-T | 88  | chr13:61111750-61111850 |
| chr13 | 61176550 | 61176650 | 1004-Lng-A-T | 154 | chr13:61176550-61176650 |
| chr13 | 61508950 | 61509050 | 1223-Lng-C-T | 50  | chr13:61508950-61509050 |
| chr13 | 61648050 | 61648150 | 1065-Lng-B-T | 53  | chr13:61648050-61648150 |
| chr13 | 61666850 | 61666950 | 1004-Lng-A-T | 74  | chr13:61666850-61666950 |
| chr13 | 62281150 | 62281250 | 1152-Lng-A-T | 86  | chr13:62281150-62281250 |
| chr13 | 62304150 | 62304250 | 1090-Lng-A-T | 67  | chr13:62304150-62304250 |
| chr13 | 62320650 | 62320750 | 1223-Lng-A-T | 124 | chr13:62320650-62320750 |
| chr13 | 62559050 | 62559150 | 1065-Lng-A-T | 58  | chr13:62559050-62559150 |
| chr13 | 62688150 | 62688250 | 901-Lng-A-T  | 64  | chr13:62688150-62688250 |
| chr13 | 62939250 | 62939350 | 1152-Lng-A-T | 48  | chr13:62939250-62939350 |
| chr13 | 63142850 | 63142950 | 901-Lng-D-T  | 47  | chr13:63142850-63142950 |
| chr13 | 63347450 | 63347550 | 901-Lng-C-T  | 166 | chr13:63347450-63347550 |
| chr13 | 63351650 | 63351750 | 901-Lng-A-T  | 89  | chr13:63351650-63351750 |
| chr13 | 63359850 | 63359950 | 1223-Lng-A-T | 209 | chr13:63359850-63359950 |
| chr13 | 63375950 | 63376050 | 1100-Lng-A-T | 65  | chr13:63375950-63376050 |
| chr13 | 63379950 | 63380050 | 1151-Lng-A-T | 119 | chr13:63379950-63380050 |
| chr13 | 63418050 | 63418150 | 901-Lng-B-T  | 54  | chr13:63418050-63418150 |
| chr13 | 63446150 | 63446250 | 1004-Lng-A-T | 105 | chr13:63446150-63446250 |
| chr13 | 63622850 | 63622950 | 1152-Lng-A-T | 78  | chr13:63622850-63622950 |
| chr13 | 63651650 | 63651750 | 1274-Lng-A-T | 317 | chr13:63651650-63651750 |
| chr13 | 63862950 | 63863050 | 901-Lng-A-T  | 90  | chr13:63862950-63863050 |
| chr13 | 64289050 | 64289150 | 901-Lng-B-T  | 90  | chr13:64289050-64289150 |
| chr13 | 64598450 | 64598550 | 846-Lng-A-T  | 248 | chr13:64598450-64598550 |
| chr13 | 64807950 | 64808050 | 1152-Lng-A-T | 38  | chr13:64807950-64808050 |
| chr13 | 64950650 | 64950750 | 1090-Lng-A-T | 65  | chr13:64950650-64950750 |
| chr13 | 65162450 | 65162550 | 1004-Lng-A-T | 222 | chr13:65162450-65162550 |
| chr13 | 65173150 | 65173250 | 1090-Lng-A-T | 93  | chr13:65173150-65173250 |
| chr13 | 65206550 | 65206650 | 1167-Lng-A-T | 76  | chr13:65206550-65206650 |
| chr13 | 65265050 | 65265150 | 1004-Lng-A-T | 83  | chr13:65265050-65265150 |
| chr13 | 65938850 | 65938950 | 1223-Lng-A-T | 743 | chr13:65938850-65938950 |
| chr13 | 67003350 | 67003450 | 1223-Lng-A-T | 214 | chr13:67003350-67003450 |

**Table S2: SB Insertion regions**

|       |          |          |              |      |                         |
|-------|----------|----------|--------------|------|-------------------------|
| chr13 | 67110050 | 67110150 | 901-Lng-C-T  | 223  | chr13:67110050-67110150 |
| chr13 | 67140550 | 67140650 | 1065-Lng-B-T | 79   | chr13:67140550-67140650 |
| chr13 | 67147450 | 67147550 | 901-Lng-A-T  | 153  | chr13:67147450-67147550 |
| chr13 | 67200450 | 67200550 | 1223-Lng-A-T | 2003 | chr13:67200450-67200550 |
| chr13 | 67409850 | 67409950 | 1223-Lng-B-T | 89   | chr13:67409850-67409950 |
| chr13 | 67426450 | 67426550 | 901-Lng-A-T  | 443  | chr13:67426450-67426550 |
| chr13 | 67435550 | 67435650 | 1152-Lng-A-T | 70   | chr13:67435550-67435650 |
| chr13 | 67594250 | 67594350 | 1004-Lng-A-T | 182  | chr13:67594250-67594350 |
| chr13 | 67594650 | 67594750 | 1065-Lng-A-T | 72   | chr13:67594650-67594750 |
| chr13 | 67641350 | 67641450 | 1188-Lng-A-T | 35   | chr13:67641350-67641450 |
| chr13 | 67691150 | 67691250 | 1167-Lng-A-T | 159  | chr13:67691150-67691250 |
| chr13 | 67703150 | 67703250 | 901-Lng-A-T  | 65   | chr13:67703150-67703250 |
| chr13 | 67718550 | 67718650 | 1004-Lng-A-T | 79   | chr13:67718550-67718650 |
| chr13 | 67851050 | 67851150 | 1090-Lng-A-T | 53   | chr13:67851050-67851150 |
| chr13 | 68092850 | 68092950 | 901-Lng-C-T  | 34   | chr13:68092850-68092950 |
| chr13 | 68802750 | 68802850 | 901-Lng-A-T  | 102  | chr13:68802750-68802850 |
| chr13 | 68939450 | 68939550 | 1065-Lng-C-T | 73   | chr13:68939450-68939550 |
| chr13 | 69071650 | 69071750 | 846-Lng-A-T  | 122  | chr13:69071650-69071750 |
| chr13 | 69106450 | 69106550 | 1004-Lng-A-T | 95   | chr13:69106450-69106550 |
| chr13 | 69627350 | 69627450 | 1274-Lng-A-T | 96   | chr13:69627350-69627450 |
| chr13 | 69647350 | 69647450 | 901-Lng-A-T  | 58   | chr13:69647350-69647450 |
| chr13 | 69942650 | 69942750 | 1004-Lng-A-T | 88   | chr13:69942650-69942750 |
| chr13 | 70073250 | 70073350 | 1188-Lng-A-T | 73   | chr13:70073250-70073350 |
| chr13 | 70340150 | 70340250 | 901-Lng-A-T  | 106  | chr13:70340150-70340250 |
| chr13 | 70345750 | 70345850 | 1065-Lng-C-T | 76   | chr13:70345750-70345850 |
| chr13 | 70470550 | 70470650 | 1065-Lng-A-T | 579  | chr13:70470550-70470650 |
| chr13 | 70693250 | 70693350 | 1065-Lng-B-T | 51   | chr13:70693250-70693350 |
| chr13 | 70705150 | 70705250 | 1223-Lng-A-T | 253  | chr13:70705150-70705250 |
| chr13 | 70705950 | 70706050 | 1072-Lng-A-T | 108  | chr13:70705950-70706050 |
| chr13 | 70730050 | 70730150 | 846-Lng-A-T  | 104  | chr13:70730050-70730150 |
| chr13 | 70747350 | 70747450 | 1223-Lng-A-T | 806  | chr13:70747350-70747450 |
| chr13 | 70836450 | 70836550 | 1223-Lng-B-T | 35   | chr13:70836450-70836550 |
| chr13 | 71291050 | 71291150 | 901-Lng-B-T  | 44   | chr13:71291050-71291150 |
| chr13 | 72057850 | 72057950 | 1100-Lng-A-T | 58   | chr13:72057850-72057950 |
| chr13 | 72087750 | 72087850 | 1152-Lng-A-T | 132  | chr13:72087750-72087850 |
| chr13 | 72124650 | 72124750 | 1004-Lng-A-T | 263  | chr13:72124650-72124750 |
| chr13 | 72167550 | 72167650 | 1072-Lng-A-T | 54   | chr13:72167550-72167650 |
| chr13 | 72265150 | 72265250 | 901-Lng-B-T  | 160  | chr13:72265150-72265250 |
| chr13 | 72586050 | 72586150 | 901-Lng-B-T  | 88   | chr13:72586050-72586150 |
| chr13 | 72717350 | 72717450 | 1065-Lng-C-T | 70   | chr13:72717350-72717450 |
| chr13 | 72726450 | 72726550 | 901-Lng-B-T  | 204  | chr13:72726450-72726550 |
| chr13 | 72746950 | 72747050 | 1223-Lng-A-T | 134  | chr13:72746950-72747050 |
| chr13 | 72751750 | 72751850 | 1065-Lng-B-T | 89   | chr13:72751750-72751850 |
| chr13 | 73610750 | 73610850 | 1223-Lng-C-T | 328  | chr13:73610750-73610850 |
| chr13 | 73618150 | 73618250 | 1188-Lng-A-T | 80   | chr13:73618150-73618250 |
| chr13 | 73623650 | 73623750 | 1004-Lng-A-T | 51   | chr13:73623650-73623750 |



**Table S2: SB Insertion regions**

|       |          |          |              |      |                         |
|-------|----------|----------|--------------|------|-------------------------|
| chr13 | 73632650 | 73632750 | 1090-Lng-B-T | 435  | chr13:73632650-73632750 |
| chr13 | 73645350 | 73645450 | 846-Lng-A-T  | 49   | chr13:73645350-73645450 |
| chr13 | 73663350 | 73663450 | 1065-Lng-B-T | 107  | chr13:73663350-73663450 |
| chr13 | 73801850 | 73801950 | 1274-Lng-A-T | 91   | chr13:73801850-73801950 |
| chr13 | 73921350 | 73921450 | 846-Lng-A-T  | 176  | chr13:73921350-73921450 |
| chr13 | 74171050 | 74171150 | 1223-Lng-B-T | 173  | chr13:74171050-74171150 |
| chr13 | 74171950 | 74172050 | 1188-Lng-A-T | 34   | chr13:74171950-74172050 |
| chr13 | 74191950 | 74192050 | 846-Lng-A-T  | 153  | chr13:74191950-74192050 |
| chr13 | 74307850 | 74307950 | 1223-Lng-A-T | 107  | chr13:74307850-74307950 |
| chr13 | 74310250 | 74310350 | 1090-Lng-A-T | 597  | chr13:74310250-74310350 |
| chr13 | 74311750 | 74311850 | 1090-Lng-A-T | 52   | chr13:74311750-74311850 |
| chr13 | 74342350 | 74342450 | 901-Lng-B-T  | 45   | chr13:74342350-74342450 |
| chr13 | 74446450 | 74446550 | 846-Lng-A-T  | 137  | chr13:74446450-74446550 |
| chr13 | 74503450 | 74503550 | 1223-Lng-D-T | 55   | chr13:74503450-74503550 |
| chr13 | 74514150 | 74514250 | 901-Lng-B-T  | 160  | chr13:74514150-74514250 |
| chr13 | 74515650 | 74515750 | 1152-Lng-A-T | 98   | chr13:74515650-74515750 |
| chr13 | 74858750 | 74858850 | 1065-Lng-A-T | 51   | chr13:74858750-74858850 |
| chr13 | 74860050 | 74860150 | 901-Lng-C-T  | 29   | chr13:74860050-74860150 |
| chr13 | 74880650 | 74880750 | 1065-Lng-C-T | 115  | chr13:74880650-74880750 |
| chr13 | 74884950 | 74885050 | 1167-Lng-A-T | 67   | chr13:74884950-74885050 |
| chr13 | 74887350 | 74887450 | 1188-Lng-A-T | 48   | chr13:74887350-74887450 |
| chr13 | 74900550 | 74900650 | 846-Lng-A-T  | 251  | chr13:74900550-74900650 |
| chr13 | 75157550 | 75157650 | 1188-Lng-A-T | 38   | chr13:75157550-75157650 |
| chr13 | 75249250 | 75249350 | 1152-Lng-A-T | 107  | chr13:75249250-75249350 |
| chr13 | 75406350 | 75406450 | 901-Lng-B-T  | 120  | chr13:75406350-75406450 |
| chr13 | 75453550 | 75453650 | 901-Lng-A-T  | 82   | chr13:75453550-75453650 |
| chr13 | 75569750 | 75569850 | 1167-Lng-A-T | 69   | chr13:75569750-75569850 |
| chr13 | 75862950 | 75863050 | 1065-Lng-B-T | 59   | chr13:75862950-75863050 |
| chr13 | 75878450 | 75878550 | 1167-Lng-A-T | 2264 | chr13:75878450-75878550 |
| chr13 | 75894350 | 75894450 | 1223-Lng-B-T | 37   | chr13:75894350-75894450 |
| chr13 | 75981850 | 75981950 | 1100-Lng-A-T | 126  | chr13:75981850-75981950 |
| chr13 | 76314950 | 76315050 | 901-Lng-A-T  | 107  | chr13:76314950-76315050 |
| chr13 | 76317150 | 76317250 | 1072-Lng-A-T | 123  | chr13:76317150-76317250 |
| chr13 | 76340550 | 76340650 | 1223-Lng-C-T | 47   | chr13:76340550-76340650 |
| chr13 | 76419050 | 76419150 | 1004-Lng-A-T | 59   | chr13:76419050-76419150 |
| chr13 | 76482450 | 76482550 | 1065-Lng-A-T | 54   | chr13:76482450-76482550 |
| chr13 | 76492750 | 76492850 | 1072-Lng-A-T | 96   | chr13:76492750-76492850 |
| chr13 | 76589350 | 76589450 | 1090-Lng-B-T | 251  | chr13:76589350-76589450 |
| chr13 | 76621650 | 76621750 | 901-Lng-B-T  | 99   | chr13:76621650-76621750 |
| chr13 | 76626550 | 76626650 | 901-Lng-A-T  | 118  | chr13:76626550-76626650 |
| chr13 | 76656850 | 76656950 | 1167-Lng-A-T | 62   | chr13:76656850-76656950 |
| chr13 | 76685750 | 76685850 | 1223-Lng-C-T | 57   | chr13:76685750-76685850 |
| chr13 | 76807250 | 76807350 | 846-Lng-A-T  | 1207 | chr13:76807250-76807350 |
| chr13 | 76887950 | 76888050 | 1065-Lng-C-T | 72   | chr13:76887950-76888050 |
| chr13 | 77160250 | 77160350 | 1223-Lng-B-T | 43   | chr13:77160250-77160350 |
| chr13 | 77163750 | 77163850 | 1090-Lng-A-T | 64   | chr13:77163750-77163850 |

**Table S2: SB Insertion regions**

|       |          |          |              |     |                         |
|-------|----------|----------|--------------|-----|-------------------------|
| chr13 | 77240750 | 77240850 | 1090-Lng-A-T | 82  | chr13:77240750-77240850 |
| chr13 | 77252550 | 77252650 | 901-Lng-A-T  | 67  | chr13:77252550-77252650 |
| chr13 | 77394350 | 77394450 | 1100-Lng-A-T | 73  | chr13:77394350-77394450 |
| chr13 | 77431450 | 77431550 | 1100-Lng-A-T | 127 | chr13:77431450-77431550 |
| chr13 | 77543250 | 77543350 | 1065-Lng-A-T | 618 | chr13:77543250-77543350 |
| chr13 | 77873950 | 77874050 | 1100-Lng-A-T | 63  | chr13:77873950-77874050 |
| chr13 | 77926750 | 77926850 | 1090-Lng-A-T | 62  | chr13:77926750-77926850 |
| chr13 | 78015750 | 78015850 | 1223-Lng-B-T | 61  | chr13:78015750-78015850 |
| chr13 | 78016350 | 78016450 | 1065-Lng-A-T | 78  | chr13:78016350-78016450 |
| chr13 | 78061250 | 78061350 | 1065-Lng-C-T | 73  | chr13:78061250-78061350 |
| chr13 | 78114250 | 78114350 | 1065-Lng-B-T | 56  | chr13:78114250-78114350 |
| chr13 | 78132450 | 78132550 | 901-Lng-C-T  | 117 | chr13:78132450-78132550 |
| chr13 | 78217850 | 78217950 | 1090-Lng-A-T | 69  | chr13:78217850-78217950 |
| chr13 | 78296750 | 78296850 | 1065-Lng-B-T | 50  | chr13:78296750-78296850 |
| chr13 | 78357050 | 78357150 | 1072-Lng-A-T | 56  | chr13:78357050-78357150 |
| chr13 | 78615850 | 78615950 | 1065-Lng-B-T | 78  | chr13:78615850-78615950 |
| chr13 | 79110850 | 79110950 | 1065-Lng-C-T | 78  | chr13:79110850-79110950 |
| chr13 | 79173950 | 79174050 | 901-Lng-A-T  | 486 | chr13:79173950-79174050 |
| chr13 | 79322850 | 79322950 | 1223-Lng-A-T | 158 | chr13:79322850-79322950 |
| chr13 | 79340450 | 79340550 | 1065-Lng-A-T | 58  | chr13:79340450-79340550 |
| chr13 | 79369550 | 79369650 | 846-Lng-A-T  | 79  | chr13:79369550-79369650 |
| chr13 | 79497650 | 79497750 | 1090-Lng-B-T | 777 | chr13:79497650-79497750 |
| chr13 | 79542150 | 79542250 | 901-Lng-D-T  | 180 | chr13:79542150-79542250 |
| chr13 | 79718050 | 79718150 | 846-Lng-A-T  | 139 | chr13:79718050-79718150 |
| chr13 | 79910350 | 79910450 | 846-Lng-A-T  | 126 | chr13:79910350-79910450 |
| chr13 | 80103050 | 80103150 | 1090-Lng-B-T | 149 | chr13:80103050-80103150 |
| chr13 | 80159350 | 80159450 | 1065-Lng-B-T | 47  | chr13:80159350-80159450 |
| chr13 | 80251150 | 80251250 | 1065-Lng-C-T | 72  | chr13:80251150-80251250 |
| chr13 | 80404950 | 80405050 | 1065-Lng-B-T | 46  | chr13:80404950-80405050 |
| chr13 | 80413050 | 80413150 | 1223-Lng-B-T | 108 | chr13:80413050-80413150 |
| chr13 | 80477150 | 80477250 | 1065-Lng-C-T | 66  | chr13:80477150-80477250 |
| chr13 | 80505350 | 80505450 | 1065-Lng-A-T | 68  | chr13:80505350-80505450 |
| chr13 | 80524150 | 80524250 | 1090-Lng-B-T | 634 | chr13:80524150-80524250 |
| chr13 | 80583450 | 80583550 | 1090-Lng-A-T | 950 | chr13:80583450-80583550 |
| chr13 | 80669350 | 80669450 | 1004-Lng-A-T | 84  | chr13:80669350-80669450 |
| chr13 | 80672950 | 80673050 | 1004-Lng-A-T | 65  | chr13:80672950-80673050 |
| chr13 | 80805250 | 80805350 | 1152-Lng-A-T | 42  | chr13:80805250-80805350 |
| chr13 | 80936550 | 80936650 | 901-Lng-C-T  | 59  | chr13:80936550-80936650 |
| chr13 | 80979950 | 80980050 | 1223-Lng-B-T | 39  | chr13:80979950-80980050 |
| chr13 | 81070450 | 81070550 | 1223-Lng-D-T | 40  | chr13:81070450-81070550 |
| chr13 | 81095550 | 81095650 | 1090-Lng-A-T | 114 | chr13:81095550-81095650 |
| chr13 | 81158750 | 81158850 | 1152-Lng-A-T | 73  | chr13:81158750-81158850 |
| chr13 | 81474550 | 81474650 | 1065-Lng-A-T | 66  | chr13:81474550-81474650 |
| chr13 | 81539450 | 81539550 | 901-Lng-D-T  | 320 | chr13:81539450-81539550 |
| chr13 | 81562350 | 81562450 | 1090-Lng-B-T | 287 | chr13:81562350-81562450 |
| chr13 | 82057850 | 82057950 | 1065-Lng-C-T | 86  | chr13:82057850-82057950 |

**Table S2: SB Insertion regions**

|       |          |          |              |      |                         |
|-------|----------|----------|--------------|------|-------------------------|
| chr13 | 83112850 | 83112950 | 1152-Lng-A-T | 49   | chr13:83112850-83112950 |
| chr13 | 83261150 | 83261250 | 901-Lng-B-T  | 41   | chr13:83261150-83261250 |
| chr13 | 83599550 | 83599650 | 1274-Lng-A-T | 66   | chr13:83599550-83599650 |
| chr13 | 84031550 | 84031650 | 1274-Lng-A-T | 126  | chr13:84031550-84031650 |
| chr13 | 84132250 | 84132350 | 1223-Lng-D-T | 50   | chr13:84132250-84132350 |
| chr13 | 84153550 | 84153650 | 1004-Lng-A-T | 1088 | chr13:84153550-84153650 |
| chr13 | 84361250 | 84361350 | 901-Lng-C-T  | 38   | chr13:84361250-84361350 |
| chr13 | 84375450 | 84375550 | 1152-Lng-A-T | 72   | chr13:84375450-84375550 |
| chr13 | 84395450 | 84395550 | 1223-Lng-A-T | 95   | chr13:84395450-84395550 |
| chr13 | 84424650 | 84424750 | 1223-Lng-D-T | 47   | chr13:84424650-84424750 |
| chr13 | 84428250 | 84428350 | 1151-Lng-A-T | 169  | chr13:84428250-84428350 |
| chr13 | 84656150 | 84656250 | 1072-Lng-A-T | 55   | chr13:84656150-84656250 |
| chr13 | 84675150 | 84675250 | 901-Lng-B-T  | 239  | chr13:84675150-84675250 |
| chr13 | 84833150 | 84833250 | 1004-Lng-A-T | 93   | chr13:84833150-84833250 |
| chr13 | 85294850 | 85294950 | 1188-Lng-A-T | 143  | chr13:85294850-85294950 |
| chr13 | 85389050 | 85389150 | 1004-Lng-A-T | 104  | chr13:85389050-85389150 |
| chr13 | 85549650 | 85549750 | 846-Lng-A-T  | 187  | chr13:85549650-85549750 |
| chr13 | 85556550 | 85556650 | 1274-Lng-A-T | 57   | chr13:85556550-85556650 |
| chr13 | 85754450 | 85754550 | 1274-Lng-A-T | 164  | chr13:85754450-85754550 |
| chr13 | 85967750 | 85967850 | 846-Lng-A-T  | 126  | chr13:85967750-85967850 |
| chr13 | 86043350 | 86043450 | 1090-Lng-B-T | 889  | chr13:86043350-86043450 |
| chr13 | 86098150 | 86098250 | 1065-Lng-B-T | 500  | chr13:86098150-86098250 |
| chr13 | 86182450 | 86182550 | 1223-Lng-B-T | 35   | chr13:86182450-86182550 |
| chr13 | 86349750 | 86349850 | 901-Lng-B-T  | 101  | chr13:86349750-86349850 |
| chr13 | 86408950 | 86409050 | 1223-Lng-A-T | 53   | chr13:86408950-86409050 |
| chr13 | 86453850 | 86453950 | 901-Lng-B-T  | 99   | chr13:86453850-86453950 |
| chr13 | 86660850 | 86660950 | 1065-Lng-B-T | 68   | chr13:86660850-86660950 |
| chr13 | 87069050 | 87069150 | 1188-Lng-A-T | 34   | chr13:87069050-87069150 |
| chr13 | 87098650 | 87098750 | 1223-Lng-C-T | 50   | chr13:87098650-87098750 |
| chr13 | 87099950 | 87100050 | 901-Lng-C-T  | 51   | chr13:87099950-87100050 |
| chr13 | 87126650 | 87126750 | 846-Lng-A-T  | 139  | chr13:87126650-87126750 |
| chr13 | 87171450 | 87171550 | 1100-Lng-A-T | 78   | chr13:87171450-87171550 |
| chr13 | 87332850 | 87332950 | 1072-Lng-A-T | 49   | chr13:87332850-87332950 |
| chr13 | 87573250 | 87573350 | 1065-Lng-A-T | 50   | chr13:87573250-87573350 |
| chr13 | 87661050 | 87661150 | 1065-Lng-A-T | 91   | chr13:87661050-87661150 |
| chr13 | 87694550 | 87694650 | 901-Lng-A-T  | 79   | chr13:87694550-87694650 |
| chr13 | 87969450 | 87969550 | 1065-Lng-B-T | 59   | chr13:87969450-87969550 |
| chr13 | 88072150 | 88072250 | 901-Lng-A-T  | 103  | chr13:88072150-88072250 |
| chr13 | 88081150 | 88081250 | 901-Lng-B-T  | 113  | chr13:88081150-88081250 |
| chr13 | 88322750 | 88322850 | 1188-Lng-A-T | 50   | chr13:88322750-88322850 |
| chr13 | 88515850 | 88515950 | 1090-Lng-B-T | 105  | chr13:88515850-88515950 |
| chr13 | 88842750 | 88842850 | 1274-Lng-A-T | 60   | chr13:88842750-88842850 |
| chr13 | 88844150 | 88844250 | 1223-Lng-B-T | 44   | chr13:88844150-88844250 |
| chr13 | 88855250 | 88855350 | 1065-Lng-A-T | 61   | chr13:88855250-88855350 |
| chr13 | 88945450 | 88945550 | 901-Lng-A-T  | 96   | chr13:88945450-88945550 |
| chr13 | 88974550 | 88974650 | 1223-Lng-B-T | 101  | chr13:88974550-88974650 |

**Table S2: SB Insertion regions**

|       |          |          |              |     |                         |
|-------|----------|----------|--------------|-----|-------------------------|
| chr13 | 89013450 | 89013550 | 1223-Lng-C-T | 54  | chr13:89013450-89013550 |
| chr13 | 89047550 | 89047650 | 1223-Lng-B-T | 330 | chr13:89047550-89047650 |
| chr13 | 89137150 | 89137250 | 1188-Lng-A-T | 48  | chr13:89137150-89137250 |
| chr13 | 89169350 | 89169450 | 1100-Lng-A-T | 98  | chr13:89169350-89169450 |
| chr13 | 89188650 | 89188750 | 901-Lng-B-T  | 564 | chr13:89188650-89188750 |
| chr13 | 89192450 | 89192550 | 1004-Lng-A-T | 491 | chr13:89192450-89192550 |
| chr13 | 89492950 | 89493050 | 1072-Lng-A-T | 49  | chr13:89492950-89493050 |
| chr13 | 89643550 | 89643650 | 1100-Lng-A-T | 211 | chr13:89643550-89643650 |
| chr13 | 89856750 | 89856850 | 1065-Lng-C-T | 75  | chr13:89856750-89856850 |
| chr13 | 90013150 | 90013250 | 1065-Lng-B-T | 52  | chr13:90013150-90013250 |
| chr13 | 90088250 | 90088350 | 1152-Lng-A-T | 62  | chr13:90088250-90088350 |
| chr13 | 90165650 | 90165750 | 846-Lng-A-T  | 150 | chr13:90165650-90165750 |
| chr13 | 90339150 | 90339250 | 1065-Lng-A-T | 76  | chr13:90339150-90339250 |
| chr13 | 90405350 | 90405450 | 1065-Lng-A-T | 72  | chr13:90405350-90405450 |
| chr13 | 90501750 | 90501850 | 901-Lng-A-T  | 69  | chr13:90501750-90501850 |
| chr13 | 90674550 | 90674650 | 1100-Lng-A-T | 117 | chr13:90674550-90674650 |
| chr13 | 90775850 | 90775950 | 1004-Lng-A-T | 54  | chr13:90775850-90775950 |
| chr13 | 90954950 | 90955050 | 1223-Lng-B-T | 50  | chr13:90954950-90955050 |
| chr13 | 91065750 | 91065850 | 901-Lng-C-T  | 39  | chr13:91065750-91065850 |
| chr13 | 91067050 | 91067150 | 1090-Lng-B-T | 549 | chr13:91067050-91067150 |
| chr13 | 91129650 | 91129750 | 1188-Lng-A-T | 91  | chr13:91129650-91129750 |
| chr13 | 91203450 | 91203550 | 1090-Lng-B-T | 71  | chr13:91203450-91203550 |
| chr13 | 91218750 | 91218850 | 901-Lng-C-T  | 41  | chr13:91218750-91218850 |
| chr13 | 91226350 | 91226450 | 1065-Lng-B-T | 58  | chr13:91226350-91226450 |
| chr13 | 91605050 | 91605150 | 901-Lng-B-T  | 310 | chr13:91605050-91605150 |
| chr13 | 91678450 | 91678550 | 1223-Lng-B-T | 36  | chr13:91678450-91678550 |
| chr13 | 91684850 | 91684950 | 1223-Lng-B-T | 83  | chr13:91684850-91684950 |
| chr13 | 91687350 | 91687450 | 1065-Lng-A-T | 45  | chr13:91687350-91687450 |
| chr13 | 91717250 | 91717350 | 1188-Lng-A-T | 173 | chr13:91717250-91717350 |
| chr13 | 91742050 | 91742150 | 1072-Lng-A-T | 57  | chr13:91742050-91742150 |
| chr13 | 91907650 | 91907750 | 1065-Lng-A-T | 60  | chr13:91907650-91907750 |
| chr13 | 92826950 | 92827050 | 901-Lng-A-T  | 753 | chr13:92826950-92827050 |
| chr13 | 92870150 | 92870250 | 901-Lng-B-T  | 185 | chr13:92870150-92870250 |
| chr13 | 92884750 | 92884850 | 846-Lng-A-T  | 84  | chr13:92884750-92884850 |
| chr13 | 93221350 | 93221450 | 1072-Lng-A-T | 59  | chr13:93221350-93221450 |
| chr13 | 93268150 | 93268250 | 1223-Lng-C-T | 62  | chr13:93268150-93268250 |
| chr13 | 93275550 | 93275650 | 1065-Lng-B-T | 54  | chr13:93275550-93275650 |
| chr13 | 93297750 | 93297850 | 1188-Lng-A-T | 244 | chr13:93297750-93297850 |
| chr13 | 93511950 | 93512050 | 1065-Lng-A-T | 57  | chr13:93511950-93512050 |
| chr13 | 93830150 | 93830250 | 1004-Lng-A-T | 641 | chr13:93830150-93830250 |
| chr13 | 93940450 | 93940550 | 1065-Lng-A-T | 103 | chr13:93940450-93940550 |
| chr13 | 93957050 | 93957150 | 1223-Lng-C-T | 147 | chr13:93957050-93957150 |
| chr13 | 93961650 | 93961750 | 1223-Lng-B-T | 35  | chr13:93961650-93961750 |
| chr13 | 94083450 | 94083550 | 1090-Lng-A-T | 62  | chr13:94083450-94083550 |
| chr13 | 94084050 | 94084150 | 1223-Lng-C-T | 44  | chr13:94084050-94084150 |
| chr13 | 94248550 | 94248650 | 1274-Lng-A-T | 52  | chr13:94248550-94248650 |

**Table S2: SB Insertion regions**

|       |          |          |              |      |                         |
|-------|----------|----------|--------------|------|-------------------------|
| chr13 | 94310850 | 94310950 | 1100-Lng-A-T | 57   | chr13:94310850-94310950 |
| chr13 | 94546650 | 94546750 | 1004-Lng-A-T | 59   | chr13:94546650-94546750 |
| chr13 | 94682250 | 94682350 | 1167-Lng-A-T | 58   | chr13:94682250-94682350 |
| chr13 | 94826650 | 94826750 | 901-Lng-A-T  | 186  | chr13:94826650-94826750 |
| chr13 | 94843350 | 94843450 | 1100-Lng-A-T | 114  | chr13:94843350-94843450 |
| chr13 | 94868450 | 94868550 | 1100-Lng-A-T | 247  | chr13:94868450-94868550 |
| chr13 | 94952650 | 94952750 | 1223-Lng-C-T | 43   | chr13:94952650-94952750 |
| chr13 | 94980950 | 94981050 | 1188-Lng-A-T | 173  | chr13:94980950-94981050 |
| chr13 | 95002950 | 95003050 | 1004-Lng-A-T | 78   | chr13:95002950-95003050 |
| chr13 | 95021050 | 95021150 | 1090-Lng-B-T | 294  | chr13:95021050-95021150 |
| chr13 | 95031250 | 95031350 | 901-Lng-C-T  | 50   | chr13:95031250-95031350 |
| chr13 | 95056650 | 95056750 | 1188-Lng-A-T | 34   | chr13:95056650-95056750 |
| chr13 | 95141050 | 95141150 | 1274-Lng-A-T | 101  | chr13:95141050-95141150 |
| chr13 | 95148550 | 95148650 | 1100-Lng-A-T | 87   | chr13:95148550-95148650 |
| chr13 | 95148750 | 95148850 | 1274-Lng-A-T | 61   | chr13:95148750-95148850 |
| chr13 | 95159550 | 95159650 | 1274-Lng-A-T | 53   | chr13:95159550-95159650 |
| chr13 | 95160650 | 95160750 | 1100-Lng-A-T | 51   | chr13:95160650-95160750 |
| chr13 | 95191950 | 95192050 | 1090-Lng-A-T | 47   | chr13:95191950-95192050 |
| chr13 | 95215850 | 95215950 | 1004-Lng-A-T | 1264 | chr13:95215850-95215950 |
| chr13 | 95281150 | 95281250 | 1167-Lng-A-T | 159  | chr13:95281150-95281250 |
| chr13 | 95333250 | 95333350 | 1223-Lng-A-T | 230  | chr13:95333250-95333350 |
| chr13 | 95538850 | 95538950 | 1188-Lng-A-T | 168  | chr13:95538850-95538950 |
| chr13 | 95560650 | 95560750 | 846-Lng-A-T  | 299  | chr13:95560650-95560750 |
| chr13 | 95565250 | 95565350 | 901-Lng-A-T  | 103  | chr13:95565250-95565350 |
| chr13 | 95581350 | 95581450 | 1188-Lng-A-T | 44   | chr13:95581350-95581450 |
| chr13 | 95590150 | 95590250 | 1188-Lng-A-T | 1946 | chr13:95590150-95590250 |
| chr13 | 95777150 | 95777250 | 1223-Lng-C-T | 45   | chr13:95777150-95777250 |
| chr13 | 95784150 | 95784250 | 901-Lng-A-T  | 52   | chr13:95784150-95784250 |
| chr13 | 95857650 | 95857750 | 1100-Lng-A-T | 127  | chr13:95857650-95857750 |
| chr13 | 95961450 | 95961550 | 1065-Lng-B-T | 65   | chr13:95961450-95961550 |
| chr13 | 95983350 | 95983450 | 846-Lng-A-T  | 124  | chr13:95983350-95983450 |
| chr13 | 96080550 | 96080650 | 1151-Lng-A-T | 64   | chr13:96080550-96080650 |
| chr13 | 96107750 | 96107850 | 1223-Lng-D-T | 270  | chr13:96107750-96107850 |
| chr13 | 96119250 | 96119350 | 1188-Lng-A-T | 38   | chr13:96119250-96119350 |
| chr13 | 96142150 | 96142250 | 1151-Lng-A-T | 183  | chr13:96142150-96142250 |
| chr13 | 96304850 | 96304950 | 1065-Lng-A-T | 48   | chr13:96304850-96304950 |
| chr13 | 96479850 | 96479950 | 901-Lng-A-T  | 182  | chr13:96479850-96479950 |
| chr13 | 96542250 | 96542350 | 901-Lng-C-T  | 85   | chr13:96542250-96542350 |
| chr13 | 96672050 | 96672150 | 1065-Lng-A-T | 120  | chr13:96672050-96672150 |
| chr13 | 96957750 | 96957850 | 901-Lng-D-T  | 441  | chr13:96957750-96957850 |
| chr13 | 97165550 | 97165650 | 1167-Lng-A-T | 167  | chr13:97165550-97165650 |
| chr13 | 97187150 | 97187250 | 1065-Lng-C-T | 185  | chr13:97187150-97187250 |
| chr13 | 97318050 | 97318150 | 846-Lng-A-T  | 49   | chr13:97318050-97318150 |
| chr13 | 97326450 | 97326550 | 1004-Lng-A-T | 65   | chr13:97326450-97326550 |
| chr13 | 97327650 | 97327750 | 1152-Lng-A-T | 131  | chr13:97327650-97327750 |
| chr13 | 97343050 | 97343150 | 901-Lng-C-T  | 51   | chr13:97343050-97343150 |

**Table S2: SB Insertion regions**

|       |           |           |              |      |                           |
|-------|-----------|-----------|--------------|------|---------------------------|
| chr13 | 97360650  | 97360750  | 1100-Lng-A-T | 51   | chr13:97360650-97360750   |
| chr13 | 97361050  | 97361150  | 1151-Lng-A-T | 55   | chr13:97361050-97361150   |
| chr13 | 97390850  | 97390950  | 1223-Lng-A-T | 1740 | chr13:97390850-97390950   |
| chr13 | 97404850  | 97404950  | 1223-Lng-D-T | 58   | chr13:97404850-97404950   |
| chr13 | 97890450  | 97890550  | 1152-Lng-A-T | 38   | chr13:97890450-97890550   |
| chr13 | 98123450  | 98123550  | 1065-Lng-B-T | 68   | chr13:98123450-98123550   |
| chr13 | 98408450  | 98408550  | 1065-Lng-C-T | 95   | chr13:98408450-98408550   |
| chr13 | 98692750  | 98692850  | 1223-Lng-A-T | 160  | chr13:98692750-98692850   |
| chr13 | 98831450  | 98831550  | 901-Lng-A-T  | 72   | chr13:98831450-98831550   |
| chr13 | 98888050  | 98888150  | 1167-Lng-A-T | 46   | chr13:98888050-98888150   |
| chr13 | 98916350  | 98916450  | 1090-Lng-A-T | 65   | chr13:98916350-98916450   |
| chr13 | 99038050  | 99038150  | 1004-Lng-A-T | 61   | chr13:99038050-99038150   |
| chr13 | 99492350  | 99492450  | 901-Lng-D-T  | 143  | chr13:99492350-99492450   |
| chr13 | 99504750  | 99504850  | 901-Lng-B-T  | 54   | chr13:99504750-99504850   |
| chr13 | 99504950  | 99505050  | 1151-Lng-A-T | 654  | chr13:99504950-99505050   |
| chr13 | 99517850  | 99517950  | 901-Lng-B-T  | 150  | chr13:99517850-99517950   |
| chr13 | 99525350  | 99525450  | 901-Lng-C-T  | 34   | chr13:99525350-99525450   |
| chr13 | 99582350  | 99582450  | 1065-Lng-B-T | 41   | chr13:99582350-99582450   |
| chr13 | 99607050  | 99607150  | 901-Lng-B-T  | 65   | chr13:99607050-99607150   |
| chr13 | 99633050  | 99633150  | 1274-Lng-A-T | 68   | chr13:99633050-99633150   |
| chr13 | 99634450  | 99634550  | 1223-Lng-C-T | 75   | chr13:99634450-99634550   |
| chr13 | 99639050  | 99639150  | 901-Lng-B-T  | 43   | chr13:99639050-99639150   |
| chr13 | 99639850  | 99639950  | 1065-Lng-B-T | 91   | chr13:99639850-99639950   |
| chr13 | 99644450  | 99644550  | 1065-Lng-A-T | 56   | chr13:99644450-99644550   |
| chr13 | 99649250  | 99649350  | 1090-Lng-A-T | 65   | chr13:99649250-99649350   |
| chr13 | 99666650  | 99666750  | 1072-Lng-A-T | 80   | chr13:99666650-99666750   |
| chr13 | 99853350  | 99853450  | 1151-Lng-A-T | 56   | chr13:99853350-99853450   |
| chr13 | 99985350  | 99985450  | 1188-Lng-A-T | 185  | chr13:99985350-99985450   |
| chr13 | 100042550 | 100042650 | 1188-Lng-A-T | 46   | chr13:100042550-100042650 |
| chr13 | 100287750 | 100287850 | 1223-Lng-C-T | 56   | chr13:100287750-100287850 |
| chr13 | 100787950 | 100788050 | 1072-Lng-A-T | 58   | chr13:100787950-100788050 |
| chr13 | 100802550 | 100802650 | 1065-Lng-B-T | 63   | chr13:100802550-100802650 |
| chr13 | 100804450 | 100804550 | 901-Lng-B-T  | 247  | chr13:100804450-100804550 |
| chr13 | 100808350 | 100808450 | 1065-Lng-B-T | 76   | chr13:100808350-100808450 |
| chr13 | 100823850 | 100823950 | 1065-Lng-A-T | 98   | chr13:100823850-100823950 |
| chr13 | 100869350 | 100869450 | 1167-Lng-A-T | 332  | chr13:100869350-100869450 |
| chr13 | 100898650 | 100898750 | 901-Lng-B-T  | 78   | chr13:100898650-100898750 |
| chr13 | 101259850 | 101259950 | 901-Lng-C-T  | 44   | chr13:101259850-101259950 |
| chr13 | 101308650 | 101308750 | 1065-Lng-B-T | 66   | chr13:101308650-101308750 |
| chr13 | 101409450 | 101409550 | 1065-Lng-A-T | 458  | chr13:101409450-101409550 |
| chr13 | 101438950 | 101439050 | 1100-Lng-A-T | 94   | chr13:101438950-101439050 |
| chr13 | 101539650 | 101539750 | 901-Lng-A-T  | 151  | chr13:101539650-101539750 |
| chr13 | 101592750 | 101592850 | 1065-Lng-B-T | 49   | chr13:101592750-101592850 |
| chr13 | 101671750 | 101671850 | 1274-Lng-A-T | 136  | chr13:101671750-101671850 |
| chr13 | 102100650 | 102100750 | 1090-Lng-B-T | 967  | chr13:102100650-102100750 |
| chr13 | 102233050 | 102233150 | 1004-Lng-A-T | 55   | chr13:102233050-102233150 |

**Table S2: SB Insertion regions**

|       |           |           |              |      |                           |
|-------|-----------|-----------|--------------|------|---------------------------|
| chr13 | 102241350 | 102241450 | 1072-Lng-A-T | 74   | chr13:102241350-102241450 |
| chr13 | 102293950 | 102294050 | 901-Lng-A-T  | 132  | chr13:102293950-102294050 |
| chr13 | 102462150 | 102462250 | 1274-Lng-A-T | 55   | chr13:102462150-102462250 |
| chr13 | 102466250 | 102466350 | 1151-Lng-A-T | 64   | chr13:102466250-102466350 |
| chr13 | 102479250 | 102479350 | 1072-Lng-A-T | 126  | chr13:102479250-102479350 |
| chr13 | 102506850 | 102506950 | 846-Lng-A-T  | 66   | chr13:102506850-102506950 |
| chr13 | 102522350 | 102522450 | 1065-Lng-C-T | 94   | chr13:102522350-102522450 |
| chr13 | 102535850 | 102535950 | 1065-Lng-A-T | 55   | chr13:102535850-102535950 |
| chr13 | 102612850 | 102612950 | 1065-Lng-C-T | 95   | chr13:102612850-102612950 |
| chr13 | 102827950 | 102828050 | 846-Lng-A-T  | 94   | chr13:102827950-102828050 |
| chr13 | 103577950 | 103578050 | 1100-Lng-A-T | 132  | chr13:103577950-103578050 |
| chr13 | 103630550 | 103630650 | 901-Lng-B-T  | 63   | chr13:103630550-103630650 |
| chr13 | 103641450 | 103641550 | 1072-Lng-A-T | 63   | chr13:103641450-103641550 |
| chr13 | 103682850 | 103682950 | 1151-Lng-A-T | 342  | chr13:103682850-103682950 |
| chr13 | 104541150 | 104541250 | 1004-Lng-A-T | 81   | chr13:104541150-104541250 |
| chr13 | 104619950 | 104620050 | 1274-Lng-A-T | 114  | chr13:104619950-104620050 |
| chr13 | 104634650 | 104634750 | 1090-Lng-B-T | 802  | chr13:104634650-104634750 |
| chr13 | 104646950 | 104647050 | 901-Lng-B-T  | 66   | chr13:104646950-104647050 |
| chr13 | 104650950 | 104651050 | 1065-Lng-A-T | 41   | chr13:104650950-104651050 |
| chr13 | 104693350 | 104693450 | 1223-Lng-A-T | 127  | chr13:104693350-104693450 |
| chr13 | 104881450 | 104881550 | 1090-Lng-A-T | 115  | chr13:104881450-104881550 |
| chr13 | 104936650 | 104936750 | 1274-Lng-A-T | 54   | chr13:104936650-104936750 |
| chr13 | 104981750 | 104981850 | 1072-Lng-A-T | 48   | chr13:104981750-104981850 |
| chr13 | 105017350 | 105017450 | 901-Lng-D-T  | 119  | chr13:105017350-105017450 |
| chr13 | 105078450 | 105078550 | 901-Lng-C-T  | 35   | chr13:105078450-105078550 |
| chr13 | 105089650 | 105089750 | 1090-Lng-A-T | 112  | chr13:105089650-105089750 |
| chr13 | 105122050 | 105122150 | 901-Lng-B-T  | 43   | chr13:105122050-105122150 |
| chr13 | 105134550 | 105134650 | 901-Lng-D-T  | 250  | chr13:105134550-105134650 |
| chr13 | 105361150 | 105361250 | 1223-Lng-C-T | 46   | chr13:105361150-105361250 |
| chr13 | 105409450 | 105409550 | 901-Lng-B-T  | 90   | chr13:105409450-105409550 |
| chr13 | 105424150 | 105424250 | 1065-Lng-C-T | 94   | chr13:105424150-105424250 |
| chr13 | 105554150 | 105554250 | 1151-Lng-A-T | 154  | chr13:105554150-105554250 |
| chr13 | 105580350 | 105580450 | 901-Lng-D-T  | 65   | chr13:105580350-105580450 |
| chr13 | 105676050 | 105676150 | 1004-Lng-A-T | 64   | chr13:105676050-105676150 |
| chr13 | 105735550 | 105735650 | 1100-Lng-A-T | 88   | chr13:105735550-105735650 |
| chr13 | 105803150 | 105803250 | 1223-Lng-A-T | 74   | chr13:105803150-105803250 |
| chr13 | 105823950 | 105824050 | 901-Lng-D-T  | 220  | chr13:105823950-105824050 |
| chr13 | 106192350 | 106192450 | 1151-Lng-A-T | 273  | chr13:106192350-106192450 |
| chr13 | 106368550 | 106368650 | 901-Lng-A-T  | 419  | chr13:106368550-106368650 |
| chr13 | 106441850 | 106441950 | 1188-Lng-A-T | 70   | chr13:106441850-106441950 |
| chr13 | 106532550 | 106532650 | 901-Lng-A-T  | 52   | chr13:106532550-106532650 |
| chr13 | 106548550 | 106548650 | 901-Lng-D-T  | 551  | chr13:106548550-106548650 |
| chr13 | 106591350 | 106591450 | 901-Lng-B-T  | 150  | chr13:106591350-106591450 |
| chr13 | 106718150 | 106718250 | 1065-Lng-A-T | 90   | chr13:106718150-106718250 |
| chr13 | 107053350 | 107053450 | 1090-Lng-A-T | 2430 | chr13:107053350-107053450 |
| chr13 | 107110550 | 107110650 | 1188-Lng-A-T | 35   | chr13:107110550-107110650 |

**Table S2: SB Insertion regions**

|       |           |           |              |      |                           |
|-------|-----------|-----------|--------------|------|---------------------------|
| chr13 | 107428350 | 107428450 | 901-Lng-B-T  | 78   | chr13:107428350-107428450 |
| chr13 | 107586750 | 107586850 | 1065-Lng-C-T | 91   | chr13:107586750-107586850 |
| chr13 | 107591350 | 107591450 | 901-Lng-D-T  | 57   | chr13:107591350-107591450 |
| chr13 | 107711050 | 107711150 | 1100-Lng-A-T | 68   | chr13:107711050-107711150 |
| chr13 | 107746950 | 107747050 | 1090-Lng-B-T | 80   | chr13:107746950-107747050 |
| chr13 | 107756750 | 107756850 | 1065-Lng-C-T | 80   | chr13:107756750-107756850 |
| chr13 | 107766850 | 107766950 | 1151-Lng-A-T | 215  | chr13:107766850-107766950 |
| chr13 | 107775750 | 107775850 | 1004-Lng-A-T | 195  | chr13:107775750-107775850 |
| chr13 | 107777850 | 107777950 | 1223-Lng-A-T | 1157 | chr13:107777850-107777950 |
| chr13 | 107803050 | 107803150 | 1188-Lng-A-T | 35   | chr13:107803050-107803150 |
| chr13 | 107805650 | 107805750 | 1072-Lng-A-T | 67   | chr13:107805650-107805750 |
| chr13 | 107869550 | 107869650 | 901-Lng-C-T  | 45   | chr13:107869550-107869650 |
| chr13 | 108204250 | 108204350 | 1090-Lng-A-T | 65   | chr13:108204250-108204350 |
| chr13 | 108518550 | 108518650 | 1100-Lng-A-T | 88   | chr13:108518550-108518650 |
| chr13 | 108526050 | 108526150 | 1151-Lng-A-T | 206  | chr13:108526050-108526150 |
| chr13 | 108575050 | 108575150 | 901-Lng-A-T  | 108  | chr13:108575050-108575150 |
| chr13 | 108598350 | 108598450 | 1100-Lng-A-T | 119  | chr13:108598350-108598450 |
| chr13 | 108603750 | 108603850 | 1100-Lng-A-T | 96   | chr13:108603750-108603850 |
| chr13 | 108622050 | 108622150 | 1167-Lng-A-T | 136  | chr13:108622050-108622150 |
| chr13 | 108623850 | 108623950 | 1274-Lng-A-T | 316  | chr13:108623850-108623950 |
| chr13 | 108635450 | 108635550 | 1151-Lng-A-T | 459  | chr13:108635450-108635550 |
| chr13 | 108849350 | 108849450 | 901-Lng-B-T  | 101  | chr13:108849350-108849450 |
| chr13 | 109105750 | 109105850 | 1223-Lng-A-T | 107  | chr13:109105750-109105850 |
| chr13 | 109510250 | 109510350 | 901-Lng-D-T  | 192  | chr13:109510250-109510350 |
| chr13 | 109745350 | 109745450 | 1223-Lng-B-T | 38   | chr13:109745350-109745450 |
| chr13 | 109913750 | 109913850 | 846-Lng-A-T  | 51   | chr13:109913750-109913850 |
| chr13 | 109924750 | 109924850 | 1065-Lng-B-T | 65   | chr13:109924750-109924850 |
| chr13 | 110086150 | 110086250 | 1072-Lng-A-T | 57   | chr13:110086150-110086250 |
| chr13 | 110087050 | 110087150 | 1065-Lng-A-T | 54   | chr13:110087050-110087150 |
| chr13 | 110120350 | 110120450 | 901-Lng-B-T  | 113  | chr13:110120350-110120450 |
| chr13 | 110240950 | 110241050 | 1167-Lng-A-T | 154  | chr13:110240950-110241050 |
| chr13 | 110248750 | 110248850 | 1072-Lng-A-T | 265  | chr13:110248750-110248850 |
| chr13 | 110271050 | 110271150 | 1188-Lng-A-T | 39   | chr13:110271050-110271150 |
| chr13 | 110284850 | 110284950 | 1274-Lng-A-T | 70   | chr13:110284850-110284950 |
| chr13 | 110320050 | 110320150 | 1065-Lng-B-T | 60   | chr13:110320050-110320150 |
| chr13 | 110348650 | 110348750 | 901-Lng-A-T  | 149  | chr13:110348650-110348750 |
| chr13 | 110449950 | 110450050 | 1090-Lng-A-T | 49   | chr13:110449950-110450050 |
| chr13 | 110495950 | 110496050 | 1167-Lng-A-T | 67   | chr13:110495950-110496050 |
| chr13 | 110628950 | 110629050 | 1188-Lng-A-T | 36   | chr13:110628950-110629050 |
| chr13 | 110631250 | 110631350 | 1188-Lng-A-T | 1560 | chr13:110631250-110631350 |
| chr13 | 110666150 | 110666250 | 1072-Lng-A-T | 59   | chr13:110666150-110666250 |
| chr13 | 110669250 | 110669350 | 1151-Lng-A-T | 224  | chr13:110669250-110669350 |
| chr13 | 110674250 | 110674350 | 1151-Lng-A-T | 164  | chr13:110674250-110674350 |
| chr13 | 110694950 | 110695050 | 1004-Lng-A-T | 59   | chr13:110694950-110695050 |
| chr13 | 110970550 | 110970650 | 1100-Lng-B-T | 74   | chr13:110970550-110970650 |
| chr13 | 111012350 | 111012450 | 1188-Lng-A-T | 109  | chr13:111012350-111012450 |



**Table S2: SB Insertion regions**

|       |           |           |              |      |                           |
|-------|-----------|-----------|--------------|------|---------------------------|
| chr13 | 111031850 | 111031950 | 1274-Lng-A-T | 103  | chr13:111031850-111031950 |
| chr13 | 111132050 | 111132150 | 1065-Lng-A-T | 280  | chr13:111132050-111132150 |
| chr13 | 111297050 | 111297150 | 1223-Lng-A-T | 2100 | chr13:111297050-111297150 |
| chr13 | 111526050 | 111526150 | 1151-Lng-A-T | 86   | chr13:111526050-111526150 |
| chr13 | 111575550 | 111575650 | 1004-Lng-A-T | 75   | chr13:111575550-111575650 |
| chr13 | 111973950 | 111974050 | 1223-Lng-D-T | 42   | chr13:111973950-111974050 |
| chr13 | 112127050 | 112127150 | 1152-Lng-A-T | 50   | chr13:112127050-112127150 |
| chr13 | 112169550 | 112169650 | 1152-Lng-A-T | 42   | chr13:112169550-112169650 |
| chr13 | 112214150 | 112214250 | 1223-Lng-C-T | 58   | chr13:112214150-112214250 |
| chr13 | 112239650 | 112239750 | 901-Lng-A-T  | 97   | chr13:112239650-112239750 |
| chr13 | 112253350 | 112253450 | 1100-Lng-A-T | 278  | chr13:112253350-112253450 |
| chr13 | 112255650 | 112255750 | 1072-Lng-A-T | 95   | chr13:112255650-112255750 |
| chr13 | 112270750 | 112270850 | 1188-Lng-A-T | 237  | chr13:112270750-112270850 |
| chr13 | 112274850 | 112274950 | 1152-Lng-A-T | 139  | chr13:112274850-112274950 |
| chr13 | 112276650 | 112276750 | 1223-Lng-C-T | 357  | chr13:112276650-112276750 |
| chr13 | 112319850 | 112319950 | 1152-Lng-A-T | 129  | chr13:112319850-112319950 |
| chr13 | 112475550 | 112475650 | 1004-Lng-A-T | 64   | chr13:112475550-112475650 |
| chr13 | 112553050 | 112553150 | 1188-Lng-A-T | 36   | chr13:112553050-112553150 |
| chr13 | 112554750 | 112554850 | 1072-Lng-A-T | 85   | chr13:112554750-112554850 |
| chr13 | 112659750 | 112659850 | 1223-Lng-A-T | 179  | chr13:112659750-112659850 |
| chr13 | 112679350 | 112679450 | 1072-Lng-A-T | 81   | chr13:112679350-112679450 |
| chr13 | 113298450 | 113298550 | 1065-Lng-C-T | 89   | chr13:113298450-113298550 |
| chr13 | 113457850 | 113457950 | 901-Lng-D-T  | 138  | chr13:113457850-113457950 |
| chr13 | 113498450 | 113498550 | 901-Lng-B-T  | 116  | chr13:113498450-113498550 |
| chr13 | 113605250 | 113605350 | 1223-Lng-A-T | 106  | chr13:113605250-113605350 |
| chr13 | 113639050 | 113639150 | 1065-Lng-B-T | 75   | chr13:113639050-113639150 |
| chr13 | 113703150 | 113703250 | 1065-Lng-B-T | 568  | chr13:113703150-113703250 |
| chr13 | 113758450 | 113758550 | 1065-Lng-A-T | 45   | chr13:113758450-113758550 |
| chr13 | 113766950 | 113767050 | 1188-Lng-A-T | 39   | chr13:113766950-113767050 |
| chr13 | 114144150 | 114144250 | 901-Lng-B-T  | 99   | chr13:114144150-114144250 |
| chr13 | 114275750 | 114275850 | 1274-Lng-A-T | 105  | chr13:114275750-114275850 |
| chr13 | 114372050 | 114372150 | 1100-Lng-A-T | 107  | chr13:114372050-114372150 |
| chr13 | 114384350 | 114384450 | 1065-Lng-A-T | 83   | chr13:114384350-114384450 |
| chr13 | 114391050 | 114391150 | 1188-Lng-A-T | 133  | chr13:114391050-114391150 |
| chr13 | 114613250 | 114613350 | 1188-Lng-A-T | 74   | chr13:114613250-114613350 |
| chr13 | 114758850 | 114758950 | 1188-Lng-A-T | 180  | chr13:114758850-114758950 |
| chr13 | 114871950 | 114872050 | 1167-Lng-A-T | 65   | chr13:114871950-114872050 |
| chr13 | 114891950 | 114892050 | 901-Lng-A-T  | 479  | chr13:114891950-114892050 |
| chr13 | 115095250 | 115095350 | 846-Lng-A-T  | 110  | chr13:115095250-115095350 |
| chr13 | 115346050 | 115346150 | 1223-Lng-D-T | 44   | chr13:115346050-115346150 |
| chr13 | 115813850 | 115813950 | 846-Lng-A-T  | 64   | chr13:115813850-115813950 |
| chr13 | 116205650 | 116205750 | 1004-Lng-A-T | 84   | chr13:116205650-116205750 |
| chr13 | 117120250 | 117120350 | 1072-Lng-A-T | 86   | chr13:117120250-117120350 |
| chr13 | 117544550 | 117544650 | 1223-Lng-C-T | 45   | chr13:117544550-117544650 |
| chr13 | 117612650 | 117612750 | 1152-Lng-A-T | 143  | chr13:117612650-117612750 |
| chr13 | 117654750 | 117654850 | 1100-Lng-A-T | 131  | chr13:117654750-117654850 |

**Table S2: SB Insertion regions**

|       |           |           |              |     |                           |
|-------|-----------|-----------|--------------|-----|---------------------------|
| chr13 | 117680550 | 117680650 | 901-Lng-B-T  | 183 | chr13:117680550-117680650 |
| chr13 | 117742550 | 117742650 | 1065-Lng-B-T | 476 | chr13:117742550-117742650 |
| chr13 | 117764750 | 117764850 | 1188-Lng-A-T | 43  | chr13:117764750-117764850 |
| chr13 | 118030150 | 118030250 | 901-Lng-C-T  | 80  | chr13:118030150-118030250 |
| chr13 | 118063650 | 118063750 | 1152-Lng-A-T | 66  | chr13:118063650-118063750 |
| chr13 | 118250750 | 118250850 | 1090-Lng-A-T | 94  | chr13:118250750-118250850 |
| chr13 | 118354450 | 118354550 | 1223-Lng-A-T | 131 | chr13:118354450-118354550 |
| chr13 | 118430850 | 118430950 | 1223-Lng-D-T | 40  | chr13:118430850-118430950 |
| chr13 | 118599050 | 118599150 | 1004-Lng-A-T | 300 | chr13:118599050-118599150 |
| chr13 | 118699250 | 118699350 | 1167-Lng-A-T | 72  | chr13:118699250-118699350 |
| chr13 | 118735050 | 118735150 | 1274-Lng-A-T | 75  | chr13:118735050-118735150 |
| chr13 | 118746850 | 118746950 | 1065-Lng-B-T | 62  | chr13:118746850-118746950 |
| chr13 | 118866250 | 118866350 | 1151-Lng-A-T | 410 | chr13:118866250-118866350 |
| chr13 | 119016550 | 119016650 | 846-Lng-A-T  | 292 | chr13:119016550-119016650 |
| chr13 | 119143650 | 119143750 | 901-Lng-A-T  | 62  | chr13:119143650-119143750 |
| chr13 | 119384650 | 119384750 | 1223-Lng-C-T | 45  | chr13:119384650-119384750 |
| chr13 | 119445750 | 119445850 | 901-Lng-C-T  | 31  | chr13:119445750-119445850 |
| chr13 | 119478650 | 119478750 | 846-Lng-A-T  | 233 | chr13:119478650-119478750 |
| chr13 | 119537750 | 119537850 | 1188-Lng-A-T | 313 | chr13:119537750-119537850 |
| chr13 | 119956250 | 119956350 | 901-Lng-B-T  | 55  | chr13:119956250-119956350 |
| chr13 | 120041950 | 120042050 | 1004-Lng-A-T | 334 | chr13:120041950-120042050 |
| chr13 | 120226250 | 120226350 | 1188-Lng-A-T | 43  | chr13:120226250-120226350 |
| chr13 | 120241750 | 120241850 | 1065-Lng-B-T | 140 | chr13:120241750-120241850 |
| chr14 | 3200450   | 3200550   | 1090-Lng-A-T | 59  | chr14:3200450-3200550     |
| chr14 | 6292650   | 6292750   | 1004-Lng-A-T | 68  | chr14:6292650-6292750     |
| chr14 | 7663750   | 7663850   | 1065-Lng-A-T | 61  | chr14:7663750-7663850     |
| chr14 | 8672550   | 8672650   | 1188-Lng-A-T | 214 | chr14:8672550-8672650     |
| chr14 | 8696050   | 8696150   | 901-Lng-A-T  | 52  | chr14:8696050-8696150     |
| chr14 | 8750650   | 8750750   | 1065-Lng-A-T | 44  | chr14:8750650-8750750     |
| chr14 | 8765950   | 8766050   | 1152-Lng-A-T | 230 | chr14:8765950-8766050     |
| chr14 | 8877850   | 8877950   | 1167-Lng-A-T | 56  | chr14:8877850-8877950     |
| chr14 | 8962550   | 8962650   | 1167-Lng-A-T | 151 | chr14:8962550-8962650     |
| chr14 | 8981350   | 8981450   | 1167-Lng-A-T | 55  | chr14:8981350-8981450     |
| chr14 | 9053650   | 9053750   | 1188-Lng-A-T | 59  | chr14:9053650-9053750     |
| chr14 | 9159550   | 9159650   | 901-Lng-A-T  | 218 | chr14:9159550-9159650     |
| chr14 | 9212650   | 9212750   | 1065-Lng-B-T | 82  | chr14:9212650-9212750     |
| chr14 | 9461550   | 9461650   | 1065-Lng-B-T | 65  | chr14:9461550-9461650     |
| chr14 | 9604850   | 9604950   | 1004-Lng-A-T | 57  | chr14:9604850-9604950     |
| chr14 | 9758550   | 9758650   | 901-Lng-A-T  | 533 | chr14:9758550-9758650     |
| chr14 | 9895450   | 9895550   | 1065-Lng-A-T | 73  | chr14:9895450-9895550     |
| chr14 | 10621250  | 10621350  | 1151-Lng-A-T | 164 | chr14:10621250-10621350   |
| chr14 | 10638850  | 10638950  | 1223-Lng-B-T | 510 | chr14:10638850-10638950   |
| chr14 | 10723450  | 10723550  | 846-Lng-A-T  | 83  | chr14:10723450-10723550   |
| chr14 | 11309850  | 11309950  | 1072-Lng-A-T | 117 | chr14:11309850-11309950   |
| chr14 | 11398150  | 11398250  | 901-Lng-D-T  | 312 | chr14:11398150-11398250   |
| chr14 | 11559950  | 11560050  | 901-Lng-A-T  | 65  | chr14:11559950-11560050   |

**Table S2: SB Insertion regions**

|       |          |          |              |      |                         |
|-------|----------|----------|--------------|------|-------------------------|
| chr14 | 11714850 | 11714950 | 901-Lng-C-T  | 39   | chr14:11714850-11714950 |
| chr14 | 12393750 | 12393850 | 901-Lng-B-T  | 152  | chr14:12393750-12393850 |
| chr14 | 12457450 | 12457550 | 1090-Lng-A-T | 67   | chr14:12457450-12457550 |
| chr14 | 12498950 | 12499050 | 1090-Lng-A-T | 134  | chr14:12498950-12499050 |
| chr14 | 12504750 | 12504850 | 1065-Lng-A-T | 109  | chr14:12504750-12504850 |
| chr14 | 12508750 | 12508850 | 1188-Lng-A-T | 39   | chr14:12508750-12508850 |
| chr14 | 12576650 | 12576750 | 1223-Lng-C-T | 52   | chr14:12576650-12576750 |
| chr14 | 12637050 | 12637150 | 1152-Lng-A-T | 83   | chr14:12637050-12637150 |
| chr14 | 12638750 | 12638850 | 1152-Lng-A-T | 105  | chr14:12638750-12638850 |
| chr14 | 12646050 | 12646150 | 1090-Lng-A-T | 48   | chr14:12646050-12646150 |
| chr14 | 12650350 | 12650450 | 901-Lng-C-T  | 44   | chr14:12650350-12650450 |
| chr14 | 12765850 | 12765950 | 1072-Lng-A-T | 49   | chr14:12765850-12765950 |
| chr14 | 12765950 | 12766050 | 1151-Lng-A-T | 136  | chr14:12765950-12766050 |
| chr14 | 12773750 | 12773850 | 1167-Lng-A-T | 52   | chr14:12773750-12773850 |
| chr14 | 12780350 | 12780450 | 846-Lng-A-T  | 102  | chr14:12780350-12780450 |
| chr14 | 12875250 | 12875350 | 901-Lng-B-T  | 91   | chr14:12875250-12875350 |
| chr14 | 12879750 | 12879850 | 1004-Lng-A-T | 63   | chr14:12879750-12879850 |
| chr14 | 12958250 | 12958350 | 1274-Lng-A-T | 49   | chr14:12958250-12958350 |
| chr14 | 12965850 | 12965950 | 1004-Lng-A-T | 484  | chr14:12965850-12965950 |
| chr14 | 13070650 | 13070750 | 1223-Lng-A-T | 2280 | chr14:13070650-13070750 |
| chr14 | 13143950 | 13144050 | 1072-Lng-A-T | 84   | chr14:13143950-13144050 |
| chr14 | 13153550 | 13153650 | 1223-Lng-A-T | 1333 | chr14:13153550-13153650 |
| chr14 | 13160850 | 13160950 | 901-Lng-C-T  | 46   | chr14:13160850-13160950 |
| chr14 | 13252550 | 13252650 | 1274-Lng-A-T | 63   | chr14:13252550-13252650 |
| chr14 | 13400250 | 13400350 | 846-Lng-A-T  | 87   | chr14:13400250-13400350 |
| chr14 | 13512350 | 13512450 | 901-Lng-C-T  | 47   | chr14:13512350-13512450 |
| chr14 | 13589350 | 13589450 | 1223-Lng-B-T | 44   | chr14:13589350-13589450 |
| chr14 | 13605150 | 13605250 | 1188-Lng-A-T | 41   | chr14:13605150-13605250 |
| chr14 | 13693550 | 13693650 | 901-Lng-B-T  | 119  | chr14:13693550-13693650 |
| chr14 | 13747950 | 13748050 | 1223-Lng-A-T | 153  | chr14:13747950-13748050 |
| chr14 | 13967950 | 13968050 | 1274-Lng-A-T | 57   | chr14:13967950-13968050 |
| chr14 | 14100550 | 14100650 | 846-Lng-A-T  | 53   | chr14:14100550-14100650 |
| chr14 | 14560050 | 14560150 | 901-Lng-A-T  | 355  | chr14:14560050-14560150 |
| chr14 | 14577050 | 14577150 | 1152-Lng-A-T | 172  | chr14:14577050-14577150 |
| chr14 | 14648250 | 14648350 | 1223-Lng-A-T | 148  | chr14:14648250-14648350 |
| chr14 | 14815750 | 14815850 | 1065-Lng-A-T | 73   | chr14:14815750-14815850 |
| chr14 | 14882150 | 14882250 | 1065-Lng-C-T | 93   | chr14:14882150-14882250 |
| chr14 | 14889950 | 14890050 | 1167-Lng-A-T | 167  | chr14:14889950-14890050 |
| chr14 | 14904150 | 14904250 | 1274-Lng-A-T | 95   | chr14:14904150-14904250 |
| chr14 | 14905950 | 14906050 | 1223-Lng-A-T | 60   | chr14:14905950-14906050 |
| chr14 | 14910450 | 14910550 | 846-Lng-A-T  | 224  | chr14:14910450-14910550 |
| chr14 | 14937350 | 14937450 | 1072-Lng-A-T | 119  | chr14:14937350-14937450 |
| chr14 | 15007350 | 15007450 | 1188-Lng-A-T | 43   | chr14:15007350-15007450 |
| chr14 | 15621850 | 15621950 | 1090-Lng-A-T | 124  | chr14:15621850-15621950 |
| chr14 | 15838750 | 15838850 | 1065-Lng-A-T | 51   | chr14:15838750-15838850 |
| chr14 | 16397250 | 16397350 | 1065-Lng-B-T | 89   | chr14:16397250-16397350 |

**Table S2: SB Insertion regions**

|       |          |          |              |      |                         |
|-------|----------|----------|--------------|------|-------------------------|
| chr14 | 16451550 | 16451650 | 1152-Lng-A-T | 417  | chr14:16451550-16451650 |
| chr14 | 16522450 | 16522550 | 1274-Lng-A-T | 49   | chr14:16522450-16522550 |
| chr14 | 17095550 | 17095650 | 1223-Lng-A-T | 423  | chr14:17095550-17095650 |
| chr14 | 17099150 | 17099250 | 1090-Lng-B-T | 1171 | chr14:17099150-17099250 |
| chr14 | 17119450 | 17119550 | 1167-Lng-A-T | 70   | chr14:17119450-17119550 |
| chr14 | 17194250 | 17194350 | 1090-Lng-A-T | 57   | chr14:17194250-17194350 |
| chr14 | 17217650 | 17217750 | 1188-Lng-A-T | 38   | chr14:17217650-17217750 |
| chr14 | 17218650 | 17218750 | 1072-Lng-A-T | 90   | chr14:17218650-17218750 |
| chr14 | 17228850 | 17228950 | 1065-Lng-A-T | 81   | chr14:17228850-17228950 |
| chr14 | 17886850 | 17886950 | 1090-Lng-B-T | 124  | chr14:17886850-17886950 |
| chr14 | 17916450 | 17916550 | 1100-Lng-A-T | 58   | chr14:17916450-17916550 |
| chr14 | 17917050 | 17917150 | 1100-Lng-A-T | 120  | chr14:17917050-17917150 |
| chr14 | 17961450 | 17961550 | 1100-Lng-A-T | 273  | chr14:17961450-17961550 |
| chr14 | 18145350 | 18145450 | 901-Lng-C-T  | 43   | chr14:18145350-18145450 |
| chr14 | 18220050 | 18220150 | 901-Lng-C-T  | 42   | chr14:18220050-18220150 |
| chr14 | 18282150 | 18282250 | 1223-Lng-C-T | 58   | chr14:18282150-18282250 |
| chr14 | 18503050 | 18503150 | 1090-Lng-A-T | 57   | chr14:18503050-18503150 |
| chr14 | 18538750 | 18538850 | 1152-Lng-A-T | 187  | chr14:18538750-18538850 |
| chr14 | 18575450 | 18575550 | 1090-Lng-B-T | 424  | chr14:18575450-18575550 |
| chr14 | 18683050 | 18683150 | 1223-Lng-B-T | 37   | chr14:18683050-18683150 |
| chr14 | 18726450 | 18726550 | 1100-Lng-A-T | 54   | chr14:18726450-18726550 |
| chr14 | 18747450 | 18747550 | 1223-Lng-C-T | 453  | chr14:18747450-18747550 |
| chr14 | 18805550 | 18805650 | 1065-Lng-A-T | 41   | chr14:18805550-18805650 |
| chr14 | 18872750 | 18872850 | 1072-Lng-A-T | 76   | chr14:18872750-18872850 |
| chr14 | 19117950 | 19118050 | 1152-Lng-A-T | 152  | chr14:19117950-19118050 |
| chr14 | 19119750 | 19119850 | 1065-Lng-B-T | 70   | chr14:19119750-19119850 |
| chr14 | 19123850 | 19123950 | 1167-Lng-A-T | 52   | chr14:19123850-19123950 |
| chr14 | 19312450 | 19312550 | 901-Lng-C-T  | 159  | chr14:19312450-19312550 |
| chr14 | 19455250 | 19455350 | 1072-Lng-A-T | 64   | chr14:19455250-19455350 |
| chr14 | 19476150 | 19476250 | 901-Lng-A-T  | 83   | chr14:19476150-19476250 |
| chr14 | 19485550 | 19485650 | 1090-Lng-A-T | 105  | chr14:19485550-19485650 |
| chr14 | 19598750 | 19598850 | 1004-Lng-A-T | 88   | chr14:19598750-19598850 |
| chr14 | 19633750 | 19633850 | 1223-Lng-B-T | 296  | chr14:19633750-19633850 |
| chr14 | 19666550 | 19666650 | 1188-Lng-A-T | 149  | chr14:19666550-19666650 |
| chr14 | 19722650 | 19722750 | 1223-Lng-B-T | 45   | chr14:19722650-19722750 |
| chr14 | 19723750 | 19723850 | 1167-Lng-A-T | 63   | chr14:19723750-19723850 |
| chr14 | 19941850 | 19941950 | 1223-Lng-B-T | 302  | chr14:19941850-19941950 |
| chr14 | 19991250 | 19991350 | 846-Lng-A-T  | 96   | chr14:19991250-19991350 |
| chr14 | 20181850 | 20181950 | 1004-Lng-A-T | 84   | chr14:20181850-20181950 |
| chr14 | 20200550 | 20200650 | 1090-Lng-A-T | 47   | chr14:20200550-20200650 |
| chr14 | 20234350 | 20234450 | 1065-Lng-B-T | 50   | chr14:20234350-20234450 |
| chr14 | 20603950 | 20604050 | 1065-Lng-B-T | 45   | chr14:20603950-20604050 |
| chr14 | 20678050 | 20678150 | 1065-Lng-B-T | 61   | chr14:20678050-20678150 |
| chr14 | 20927350 | 20927450 | 1065-Lng-A-T | 61   | chr14:20927350-20927450 |
| chr14 | 21361350 | 21361450 | 1223-Lng-C-T | 65   | chr14:21361350-21361450 |
| chr14 | 21520250 | 21520350 | 1274-Lng-A-T | 71   | chr14:21520250-21520350 |

**Table S2: SB Insertion regions**

|       |          |          |              |     |                         |
|-------|----------|----------|--------------|-----|-------------------------|
| chr14 | 21562550 | 21562650 | 1090-Lng-B-T | 64  | chr14:21562550-21562650 |
| chr14 | 21580650 | 21580750 | 1100-Lng-A-T | 142 | chr14:21580650-21580750 |
| chr14 | 21598550 | 21598650 | 1223-Lng-C-T | 51  | chr14:21598550-21598650 |
| chr14 | 21756850 | 21756950 | 1151-Lng-A-T | 252 | chr14:21756850-21756950 |
| chr14 | 21795050 | 21795150 | 1065-Lng-C-T | 72  | chr14:21795050-21795150 |
| chr14 | 21801450 | 21801550 | 1152-Lng-A-T | 83  | chr14:21801450-21801550 |
| chr14 | 21842550 | 21842650 | 1065-Lng-A-T | 40  | chr14:21842550-21842650 |
| chr14 | 21846050 | 21846150 | 1090-Lng-A-T | 56  | chr14:21846050-21846150 |
| chr14 | 21888150 | 21888250 | 1274-Lng-A-T | 137 | chr14:21888150-21888250 |
| chr14 | 21919350 | 21919450 | 1090-Lng-B-T | 662 | chr14:21919350-21919450 |
| chr14 | 21941350 | 21941450 | 1152-Lng-A-T | 49  | chr14:21941350-21941450 |
| chr14 | 22006950 | 22007050 | 1065-Lng-B-T | 70  | chr14:22006950-22007050 |
| chr14 | 22047850 | 22047950 | 1065-Lng-A-T | 54  | chr14:22047850-22047950 |
| chr14 | 22084550 | 22084650 | 1065-Lng-C-T | 161 | chr14:22084550-22084650 |
| chr14 | 22126650 | 22126750 | 1188-Lng-A-T | 36  | chr14:22126650-22126750 |
| chr14 | 22281450 | 22281550 | 901-Lng-D-T  | 43  | chr14:22281450-22281550 |
| chr14 | 22323950 | 22324050 | 1223-Lng-A-T | 286 | chr14:22323950-22324050 |
| chr14 | 22369750 | 22369850 | 1065-Lng-A-T | 40  | chr14:22369750-22369850 |
| chr14 | 22379750 | 22379850 | 901-Lng-C-T  | 68  | chr14:22379750-22379850 |
| chr14 | 22498150 | 22498250 | 1223-Lng-D-T | 42  | chr14:22498150-22498250 |
| chr14 | 22657550 | 22657650 | 1090-Lng-A-T | 58  | chr14:22657550-22657650 |
| chr14 | 22669750 | 22669850 | 1188-Lng-A-T | 176 | chr14:22669750-22669850 |
| chr14 | 22826950 | 22827050 | 1188-Lng-A-T | 35  | chr14:22826950-22827050 |
| chr14 | 22957050 | 22957150 | 1223-Lng-C-T | 48  | chr14:22957050-22957150 |
| chr14 | 23059350 | 23059450 | 901-Lng-A-T  | 714 | chr14:23059350-23059450 |
| chr14 | 23119650 | 23119750 | 1065-Lng-C-T | 92  | chr14:23119650-23119750 |
| chr14 | 23145250 | 23145350 | 1065-Lng-B-T | 55  | chr14:23145250-23145350 |
| chr14 | 23244850 | 23244950 | 901-Lng-A-T  | 79  | chr14:23244850-23244950 |
| chr14 | 23268450 | 23268550 | 1065-Lng-C-T | 162 | chr14:23268450-23268550 |
| chr14 | 23275150 | 23275250 | 1223-Lng-B-T | 34  | chr14:23275150-23275250 |
| chr14 | 23275650 | 23275750 | 901-Lng-C-T  | 57  | chr14:23275650-23275750 |
| chr14 | 23520750 | 23520850 | 1188-Lng-A-T | 224 | chr14:23520750-23520850 |
| chr14 | 23594150 | 23594250 | 1223-Lng-B-T | 34  | chr14:23594150-23594250 |
| chr14 | 23627550 | 23627650 | 1223-Lng-A-T | 123 | chr14:23627550-23627650 |
| chr14 | 23662950 | 23663050 | 1090-Lng-A-T | 124 | chr14:23662950-23663050 |
| chr14 | 23694750 | 23694850 | 1065-Lng-B-T | 45  | chr14:23694750-23694850 |
| chr14 | 23721150 | 23721250 | 1072-Lng-A-T | 222 | chr14:23721150-23721250 |
| chr14 | 23751850 | 23751950 | 1100-Lng-A-T | 84  | chr14:23751850-23751950 |
| chr14 | 23848450 | 23848550 | 1223-Lng-A-T | 137 | chr14:23848450-23848550 |
| chr14 | 23986850 | 23986950 | 846-Lng-A-T  | 124 | chr14:23986850-23986950 |
| chr14 | 24011050 | 24011150 | 1065-Lng-B-T | 220 | chr14:24011050-24011150 |
| chr14 | 24072250 | 24072350 | 1274-Lng-A-T | 100 | chr14:24072250-24072350 |
| chr14 | 24410550 | 24410650 | 1152-Lng-A-T | 48  | chr14:24410550-24410650 |
| chr14 | 24949250 | 24949350 | 1065-Lng-B-T | 74  | chr14:24949250-24949350 |
| chr14 | 25003650 | 25003750 | 1090-Lng-B-T | 463 | chr14:25003650-25003750 |
| chr14 | 25037850 | 25037950 | 901-Lng-A-T  | 82  | chr14:25037850-25037950 |

**Table S2: SB Insertion regions**

|       |          |          |              |      |                         |
|-------|----------|----------|--------------|------|-------------------------|
| chr14 | 25079950 | 25080050 | 1152-Lng-A-T | 37   | chr14:25079950-25080050 |
| chr14 | 25587650 | 25587750 | 1072-Lng-A-T | 164  | chr14:25587650-25587750 |
| chr14 | 26183450 | 26183550 | 1151-Lng-A-T | 79   | chr14:26183450-26183550 |
| chr14 | 26338450 | 26338550 | 1065-Lng-B-T | 69   | chr14:26338450-26338550 |
| chr14 | 26401850 | 26401950 | 1223-Lng-C-T | 44   | chr14:26401850-26401950 |
| chr14 | 26403050 | 26403150 | 1188-Lng-A-T | 50   | chr14:26403050-26403150 |
| chr14 | 26433250 | 26433350 | 1152-Lng-A-T | 418  | chr14:26433250-26433350 |
| chr14 | 27191350 | 27191450 | 1090-Lng-B-T | 202  | chr14:27191350-27191450 |
| chr14 | 27242550 | 27242650 | 1223-Lng-B-T | 151  | chr14:27242550-27242650 |
| chr14 | 27276050 | 27276150 | 1223-Lng-B-T | 171  | chr14:27276050-27276150 |
| chr14 | 27283650 | 27283750 | 1100-Lng-A-T | 91   | chr14:27283650-27283750 |
| chr14 | 27302250 | 27302350 | 1065-Lng-C-T | 75   | chr14:27302250-27302350 |
| chr14 | 27305750 | 27305850 | 901-Lng-B-T  | 66   | chr14:27305750-27305850 |
| chr14 | 27309650 | 27309750 | 1223-Lng-C-T | 44   | chr14:27309650-27309750 |
| chr14 | 27324250 | 27324350 | 1151-Lng-A-T | 199  | chr14:27324250-27324350 |
| chr14 | 27332350 | 27332450 | 1090-Lng-A-T | 50   | chr14:27332350-27332450 |
| chr14 | 27340950 | 27341050 | 1100-Lng-A-T | 350  | chr14:27340950-27341050 |
| chr14 | 27348550 | 27348650 | 1065-Lng-B-T | 359  | chr14:27348550-27348650 |
| chr14 | 27351650 | 27351750 | 1223-Lng-B-T | 197  | chr14:27351650-27351750 |
| chr14 | 27440350 | 27440450 | 1223-Lng-C-T | 50   | chr14:27440350-27440450 |
| chr14 | 27622050 | 27622150 | 1152-Lng-A-T | 31   | chr14:27622050-27622150 |
| chr14 | 27639850 | 27639950 | 1151-Lng-A-T | 105  | chr14:27639850-27639950 |
| chr14 | 27659250 | 27659350 | 1274-Lng-A-T | 55   | chr14:27659250-27659350 |
| chr14 | 28032850 | 28032950 | 1090-Lng-A-T | 145  | chr14:28032850-28032950 |
| chr14 | 28275850 | 28275950 | 1100-Lng-A-T | 64   | chr14:28275850-28275950 |
| chr14 | 28289750 | 28289850 | 1100-Lng-A-T | 98   | chr14:28289750-28289850 |
| chr14 | 28290650 | 28290750 | 901-Lng-A-T  | 166  | chr14:28290650-28290750 |
| chr14 | 28622850 | 28622950 | 846-Lng-A-T  | 79   | chr14:28622850-28622950 |
| chr14 | 28748750 | 28748850 | 1223-Lng-B-T | 52   | chr14:28748750-28748850 |
| chr14 | 28884850 | 28884950 | 1065-Lng-A-T | 56   | chr14:28884850-28884950 |
| chr14 | 28891150 | 28891250 | 1090-Lng-A-T | 86   | chr14:28891150-28891250 |
| chr14 | 29040350 | 29040450 | 1065-Lng-C-T | 65   | chr14:29040350-29040450 |
| chr14 | 29482550 | 29482650 | 901-Lng-C-T  | 47   | chr14:29482550-29482650 |
| chr14 | 29556350 | 29556450 | 1223-Lng-B-T | 274  | chr14:29556350-29556450 |
| chr14 | 29667850 | 29667950 | 1223-Lng-B-T | 43   | chr14:29667850-29667950 |
| chr14 | 29682950 | 29683050 | 1090-Lng-A-T | 86   | chr14:29682950-29683050 |
| chr14 | 30035150 | 30035250 | 1090-Lng-A-T | 53   | chr14:30035150-30035250 |
| chr14 | 30035550 | 30035650 | 1004-Lng-A-T | 71   | chr14:30035550-30035650 |
| chr14 | 30052250 | 30052350 | 1223-Lng-C-T | 43   | chr14:30052250-30052350 |
| chr14 | 30156050 | 30156150 | 1065-Lng-C-T | 96   | chr14:30156050-30156150 |
| chr14 | 30973850 | 30973950 | 1100-Lng-B-T | 52   | chr14:30973850-30973950 |
| chr14 | 31188350 | 31188450 | 1065-Lng-C-T | 97   | chr14:31188350-31188450 |
| chr14 | 31234750 | 31234850 | 1065-Lng-B-T | 39   | chr14:31234750-31234850 |
| chr14 | 31338550 | 31338650 | 1100-Lng-A-T | 1258 | chr14:31338550-31338650 |
| chr14 | 31369050 | 31369150 | 1072-Lng-A-T | 66   | chr14:31369050-31369150 |
| chr14 | 31426350 | 31426450 | 1065-Lng-C-T | 68   | chr14:31426350-31426450 |

**Table S2: SB Insertion regions**

|       |          |          |              |       |                         |
|-------|----------|----------|--------------|-------|-------------------------|
| chr14 | 31428450 | 31428550 | 1065-Lng-C-T | 107   | chr14:31428450-31428550 |
| chr14 | 31480850 | 31480950 | 1223-Lng-B-T | 50    | chr14:31480850-31480950 |
| chr14 | 31510550 | 31510650 | 1004-Lng-A-T | 662   | chr14:31510550-31510650 |
| chr14 | 31577250 | 31577350 | 1274-Lng-A-T | 172   | chr14:31577250-31577350 |
| chr14 | 31584350 | 31584450 | 901-Lng-C-T  | 31    | chr14:31584350-31584450 |
| chr14 | 31628250 | 31628350 | 1100-Lng-A-T | 96    | chr14:31628250-31628350 |
| chr14 | 31646650 | 31646750 | 1090-Lng-B-T | 520   | chr14:31646650-31646750 |
| chr14 | 31673650 | 31673750 | 1100-Lng-A-T | 84    | chr14:31673650-31673750 |
| chr14 | 31678750 | 31678850 | 1100-Lng-A-T | 59    | chr14:31678750-31678850 |
| chr14 | 31838250 | 31838350 | 901-Lng-B-T  | 151   | chr14:31838250-31838350 |
| chr14 | 31844350 | 31844450 | 1188-Lng-A-T | 220   | chr14:31844350-31844450 |
| chr14 | 31869850 | 31869950 | 1065-Lng-B-T | 39    | chr14:31869850-31869950 |
| chr14 | 31875850 | 31875950 | 1152-Lng-A-T | 46    | chr14:31875850-31875950 |
| chr14 | 31881950 | 31882050 | 1274-Lng-A-T | 228   | chr14:31881950-31882050 |
| chr14 | 31884750 | 31884850 | 1100-Lng-B-T | 13601 | chr14:31884750-31884850 |
| chr14 | 31885550 | 31885650 | 1223-Lng-B-T | 49    | chr14:31885550-31885650 |
| chr14 | 31905450 | 31905550 | 901-Lng-C-T  | 86    | chr14:31905450-31905550 |
| chr14 | 31925650 | 31925750 | 1188-Lng-A-T | 445   | chr14:31925650-31925750 |
| chr14 | 32038250 | 32038350 | 1100-Lng-A-T | 74    | chr14:32038250-32038350 |
| chr14 | 32171550 | 32171650 | 1151-Lng-A-T | 269   | chr14:32171550-32171650 |
| chr14 | 32624450 | 32624550 | 901-Lng-C-T  | 55    | chr14:32624450-32624550 |
| chr14 | 32628150 | 32628250 | 901-Lng-A-T  | 78    | chr14:32628150-32628250 |
| chr14 | 32984750 | 32984850 | 901-Lng-A-T  | 314   | chr14:32984750-32984850 |
| chr14 | 33006250 | 33006350 | 1223-Lng-D-T | 72    | chr14:33006250-33006350 |
| chr14 | 33094550 | 33094650 | 1223-Lng-C-T | 61    | chr14:33094550-33094650 |
| chr14 | 33096250 | 33096350 | 1223-Lng-B-T | 43    | chr14:33096250-33096350 |
| chr14 | 33334750 | 33334850 | 1151-Lng-A-T | 54    | chr14:33334750-33334850 |
| chr14 | 33626250 | 33626350 | 1090-Lng-B-T | 251   | chr14:33626250-33626350 |
| chr14 | 33630450 | 33630550 | 1065-Lng-A-T | 123   | chr14:33630450-33630550 |
| chr14 | 33698050 | 33698150 | 1065-Lng-A-T | 233   | chr14:33698050-33698150 |
| chr14 | 34197250 | 34197350 | 1223-Lng-A-T | 66    | chr14:34197250-34197350 |
| chr14 | 34249950 | 34250050 | 1188-Lng-A-T | 50    | chr14:34249950-34250050 |
| chr14 | 34421050 | 34421150 | 1274-Lng-A-T | 56    | chr14:34421050-34421150 |
| chr14 | 34721250 | 34721350 | 1090-Lng-A-T | 72    | chr14:34721250-34721350 |
| chr14 | 35054050 | 35054150 | 1004-Lng-A-T | 118   | chr14:35054050-35054150 |
| chr14 | 35059650 | 35059750 | 1004-Lng-A-T | 57    | chr14:35059650-35059750 |
| chr14 | 35103550 | 35103650 | 1274-Lng-A-T | 68    | chr14:35103550-35103650 |
| chr14 | 35112250 | 35112350 | 1065-Lng-C-T | 62    | chr14:35112250-35112350 |
| chr14 | 35218650 | 35218750 | 901-Lng-C-T  | 38    | chr14:35218650-35218750 |
| chr14 | 35226050 | 35226150 | 1151-Lng-A-T | 107   | chr14:35226050-35226150 |
| chr14 | 35243150 | 35243250 | 1223-Lng-C-T | 45    | chr14:35243150-35243250 |
| chr14 | 35256350 | 35256450 | 1223-Lng-B-T | 46    | chr14:35256350-35256450 |
| chr14 | 35281850 | 35281950 | 1151-Lng-A-T | 65    | chr14:35281850-35281950 |
| chr14 | 35286450 | 35286550 | 1188-Lng-A-T | 41    | chr14:35286450-35286550 |
| chr14 | 35462750 | 35462850 | 1004-Lng-A-T | 88    | chr14:35462750-35462850 |
| chr14 | 35488750 | 35488850 | 1090-Lng-A-T | 64    | chr14:35488750-35488850 |

**Table S2: SB Insertion regions**

|       |          |          |              |     |                         |
|-------|----------|----------|--------------|-----|-------------------------|
| chr14 | 35499950 | 35500050 | 901-Lng-B-T  | 82  | chr14:35499950-35500050 |
| chr14 | 35503050 | 35503150 | 901-Lng-C-T  | 59  | chr14:35503050-35503150 |
| chr14 | 35504350 | 35504450 | 1065-Lng-B-T | 52  | chr14:35504350-35504450 |
| chr14 | 35509350 | 35509450 | 1004-Lng-A-T | 108 | chr14:35509350-35509450 |
| chr14 | 35523450 | 35523550 | 1072-Lng-A-T | 55  | chr14:35523450-35523550 |
| chr14 | 35524850 | 35524950 | 1223-Lng-C-T | 47  | chr14:35524850-35524950 |
| chr14 | 35553050 | 35553150 | 1223-Lng-B-T | 47  | chr14:35553050-35553150 |
| chr14 | 35637550 | 35637650 | 901-Lng-C-T  | 44  | chr14:35637550-35637650 |
| chr14 | 35813250 | 35813350 | 846-Lng-A-T  | 299 | chr14:35813250-35813350 |
| chr14 | 35817150 | 35817250 | 1274-Lng-A-T | 55  | chr14:35817150-35817250 |
| chr14 | 35895450 | 35895550 | 1004-Lng-A-T | 58  | chr14:35895450-35895550 |
| chr14 | 36208650 | 36208750 | 901-Lng-C-T  | 55  | chr14:36208650-36208750 |
| chr14 | 36311950 | 36312050 | 1223-Lng-B-T | 200 | chr14:36311950-36312050 |
| chr14 | 36639350 | 36639450 | 1065-Lng-A-T | 65  | chr14:36639350-36639450 |
| chr14 | 36829150 | 36829250 | 1004-Lng-A-T | 53  | chr14:36829150-36829250 |
| chr14 | 36946650 | 36946750 | 901-Lng-C-T  | 169 | chr14:36946650-36946750 |
| chr14 | 37004150 | 37004250 | 1152-Lng-A-T | 217 | chr14:37004150-37004250 |
| chr14 | 37383550 | 37383650 | 1072-Lng-A-T | 49  | chr14:37383550-37383650 |
| chr14 | 37489350 | 37489450 | 846-Lng-A-T  | 116 | chr14:37489350-37489450 |
| chr14 | 37558350 | 37558450 | 901-Lng-A-T  | 77  | chr14:37558350-37558450 |
| chr14 | 37701550 | 37701650 | 846-Lng-A-T  | 123 | chr14:37701550-37701650 |
| chr14 | 37710250 | 37710350 | 901-Lng-B-T  | 256 | chr14:37710250-37710350 |
| chr14 | 37712350 | 37712450 | 901-Lng-B-T  | 166 | chr14:37712350-37712450 |
| chr14 | 37752550 | 37752650 | 901-Lng-B-T  | 177 | chr14:37752550-37752650 |
| chr14 | 37794450 | 37794550 | 1065-Lng-C-T | 80  | chr14:37794450-37794550 |
| chr14 | 37832550 | 37832650 | 901-Lng-C-T  | 77  | chr14:37832550-37832650 |
| chr14 | 37912750 | 37912850 | 901-Lng-A-T  | 334 | chr14:37912750-37912850 |
| chr14 | 37933750 | 37933850 | 1167-Lng-A-T | 76  | chr14:37933750-37933850 |
| chr14 | 37977150 | 37977250 | 1152-Lng-A-T | 52  | chr14:37977150-37977250 |
| chr14 | 38124350 | 38124450 | 1072-Lng-A-T | 79  | chr14:38124350-38124450 |
| chr14 | 38367250 | 38367350 | 1188-Lng-A-T | 109 | chr14:38367250-38367350 |
| chr14 | 38549850 | 38549950 | 901-Lng-A-T  | 69  | chr14:38549850-38549950 |
| chr14 | 38771150 | 38771250 | 1065-Lng-A-T | 58  | chr14:38771150-38771250 |
| chr14 | 38934150 | 38934250 | 1223-Lng-B-T | 407 | chr14:38934150-38934250 |
| chr14 | 39055650 | 39055750 | 1274-Lng-A-T | 54  | chr14:39055650-39055750 |
| chr14 | 39382450 | 39382550 | 846-Lng-A-T  | 58  | chr14:39382450-39382550 |
| chr14 | 39846150 | 39846250 | 1065-Lng-B-T | 115 | chr14:39846150-39846250 |
| chr14 | 40127050 | 40127150 | 901-Lng-A-T  | 350 | chr14:40127050-40127150 |
| chr14 | 40171550 | 40171650 | 1090-Lng-B-T | 147 | chr14:40171550-40171650 |
| chr14 | 40675150 | 40675250 | 1090-Lng-A-T | 78  | chr14:40675150-40675250 |
| chr14 | 41326650 | 41326750 | 901-Lng-A-T  | 83  | chr14:41326650-41326750 |
| chr14 | 41720950 | 41721050 | 1065-Lng-B-T | 58  | chr14:41720950-41721050 |
| chr14 | 41895950 | 41896050 | 901-Lng-D-T  | 76  | chr14:41895950-41896050 |
| chr14 | 41972450 | 41972550 | 901-Lng-B-T  | 64  | chr14:41972450-41972550 |
| chr14 | 43952350 | 43952450 | 1223-Lng-B-T | 61  | chr14:43952350-43952450 |
| chr14 | 44011150 | 44011250 | 1274-Lng-A-T | 57  | chr14:44011150-44011250 |



**Table S2: SB Insertion regions**

|       |          |          |              |      |                         |
|-------|----------|----------|--------------|------|-------------------------|
| chr14 | 45484650 | 45484750 | 1090-Lng-A-T | 58   | chr14:45484650-45484750 |
| chr14 | 45542450 | 45542550 | 1004-Lng-A-T | 63   | chr14:45542450-45542550 |
| chr14 | 45745750 | 45745850 | 1223-Lng-B-T | 1523 | chr14:45745750-45745850 |
| chr14 | 45918850 | 45918950 | 901-Lng-B-T  | 102  | chr14:45918850-45918950 |
| chr14 | 45941550 | 45941650 | 1223-Lng-B-T | 35   | chr14:45941550-45941650 |
| chr14 | 45945650 | 45945750 | 1223-Lng-D-T | 40   | chr14:45945650-45945750 |
| chr14 | 45962750 | 45962850 | 1167-Lng-A-T | 49   | chr14:45962750-45962850 |
| chr14 | 46228750 | 46228850 | 1072-Lng-A-T | 109  | chr14:46228750-46228850 |
| chr14 | 46245450 | 46245550 | 1072-Lng-A-T | 285  | chr14:46245450-46245550 |
| chr14 | 46259350 | 46259450 | 901-Lng-A-T  | 131  | chr14:46259350-46259450 |
| chr14 | 46563750 | 46563850 | 1065-Lng-A-T | 52   | chr14:46563750-46563850 |
| chr14 | 46592850 | 46592950 | 1152-Lng-A-T | 42   | chr14:46592850-46592950 |
| chr14 | 46600850 | 46600950 | 1065-Lng-C-T | 89   | chr14:46600850-46600950 |
| chr14 | 46757150 | 46757250 | 901-Lng-A-T  | 74   | chr14:46757150-46757250 |
| chr14 | 46871550 | 46871650 | 1090-Lng-A-T | 53   | chr14:46871550-46871650 |
| chr14 | 46940250 | 46940350 | 901-Lng-C-T  | 38   | chr14:46940250-46940350 |
| chr14 | 47004650 | 47004750 | 1152-Lng-A-T | 368  | chr14:47004650-47004750 |
| chr14 | 47068550 | 47068650 | 1090-Lng-A-T | 44   | chr14:47068550-47068650 |
| chr14 | 47473150 | 47473250 | 1065-Lng-B-T | 96   | chr14:47473150-47473250 |
| chr14 | 47596550 | 47596650 | 901-Lng-C-T  | 272  | chr14:47596550-47596650 |
| chr14 | 47650950 | 47651050 | 1065-Lng-A-T | 36   | chr14:47650950-47651050 |
| chr14 | 47670150 | 47670250 | 1090-Lng-A-T | 62   | chr14:47670150-47670250 |
| chr14 | 47772650 | 47772750 | 901-Lng-A-T  | 100  | chr14:47772650-47772750 |
| chr14 | 47799550 | 47799650 | 901-Lng-C-T  | 162  | chr14:47799550-47799650 |
| chr14 | 47810450 | 47810550 | 1152-Lng-A-T | 49   | chr14:47810450-47810550 |
| chr14 | 47920250 | 47920350 | 1065-Lng-A-T | 44   | chr14:47920250-47920350 |
| chr14 | 48004250 | 48004350 | 1151-Lng-A-T | 347  | chr14:48004250-48004350 |
| chr14 | 48119550 | 48119650 | 1223-Lng-C-T | 131  | chr14:48119550-48119650 |
| chr14 | 48141650 | 48141750 | 1151-Lng-A-T | 229  | chr14:48141650-48141750 |
| chr14 | 48327250 | 48327350 | 1151-Lng-A-T | 313  | chr14:48327250-48327350 |
| chr14 | 48331750 | 48331850 | 1065-Lng-A-T | 233  | chr14:48331750-48331850 |
| chr14 | 48338350 | 48338450 | 1151-Lng-A-T | 175  | chr14:48338350-48338450 |
| chr14 | 48513750 | 48513850 | 1223-Lng-A-T | 114  | chr14:48513750-48513850 |
| chr14 | 48608950 | 48609050 | 901-Lng-A-T  | 75   | chr14:48608950-48609050 |
| chr14 | 48717050 | 48717150 | 846-Lng-A-T  | 71   | chr14:48717050-48717150 |
| chr14 | 48726050 | 48726150 | 1223-Lng-C-T | 50   | chr14:48726050-48726150 |
| chr14 | 48739150 | 48739250 | 901-Lng-D-T  | 743  | chr14:48739150-48739250 |
| chr14 | 48814150 | 48814250 | 1223-Lng-A-T | 188  | chr14:48814150-48814250 |
| chr14 | 48868450 | 48868550 | 901-Lng-C-T  | 35   | chr14:48868450-48868550 |
| chr14 | 48921750 | 48921850 | 901-Lng-D-T  | 260  | chr14:48921750-48921850 |
| chr14 | 48926150 | 48926250 | 1223-Lng-B-T | 154  | chr14:48926150-48926250 |
| chr14 | 49002750 | 49002850 | 846-Lng-A-T  | 210  | chr14:49002750-49002850 |
| chr14 | 49067050 | 49067150 | 1152-Lng-A-T | 43   | chr14:49067050-49067150 |
| chr14 | 49078850 | 49078950 | 1004-Lng-A-T | 75   | chr14:49078850-49078950 |
| chr14 | 49102450 | 49102550 | 901-Lng-D-T  | 48   | chr14:49102450-49102550 |
| chr14 | 49431950 | 49432050 | 1004-Lng-A-T | 73   | chr14:49431950-49432050 |

**Table S2: SB Insertion regions**

|       |          |          |              |      |                         |
|-------|----------|----------|--------------|------|-------------------------|
| chr14 | 49523550 | 49523650 | 901-Lng-C-T  | 290  | chr14:49523550-49523650 |
| chr14 | 49634850 | 49634950 | 1065-Lng-A-T | 39   | chr14:49634850-49634950 |
| chr14 | 49644050 | 49644150 | 1065-Lng-C-T | 430  | chr14:49644050-49644150 |
| chr14 | 49667550 | 49667650 | 1072-Lng-A-T | 177  | chr14:49667550-49667650 |
| chr14 | 49668850 | 49668950 | 1065-Lng-B-T | 57   | chr14:49668850-49668950 |
| chr14 | 49793450 | 49793550 | 901-Lng-C-T  | 35   | chr14:49793450-49793550 |
| chr14 | 49803950 | 49804050 | 1223-Lng-B-T | 50   | chr14:49803950-49804050 |
| chr14 | 49826150 | 49826250 | 1065-Lng-B-T | 265  | chr14:49826150-49826250 |
| chr14 | 49938250 | 49938350 | 846-Lng-A-T  | 98   | chr14:49938250-49938350 |
| chr14 | 50265450 | 50265550 | 1065-Lng-A-T | 36   | chr14:50265450-50265550 |
| chr14 | 50647850 | 50647950 | 846-Lng-A-T  | 63   | chr14:50647850-50647950 |
| chr14 | 50758150 | 50758250 | 1065-Lng-B-T | 89   | chr14:50758150-50758250 |
| chr14 | 50817950 | 50818050 | 1100-Lng-A-T | 51   | chr14:50817950-50818050 |
| chr14 | 51141150 | 51141250 | 901-Lng-C-T  | 36   | chr14:51141150-51141250 |
| chr14 | 51142950 | 51143050 | 1274-Lng-A-T | 79   | chr14:51142950-51143050 |
| chr14 | 51307250 | 51307350 | 1188-Lng-A-T | 249  | chr14:51307250-51307350 |
| chr14 | 51387850 | 51387950 | 1072-Lng-A-T | 65   | chr14:51387850-51387950 |
| chr14 | 51418250 | 51418350 | 1152-Lng-A-T | 79   | chr14:51418250-51418350 |
| chr14 | 52216150 | 52216250 | 1004-Lng-A-T | 78   | chr14:52216150-52216250 |
| chr14 | 52393850 | 52393950 | 901-Lng-B-T  | 70   | chr14:52393850-52393950 |
| chr14 | 52423850 | 52423950 | 1223-Lng-C-T | 49   | chr14:52423850-52423950 |
| chr14 | 52586850 | 52586950 | 1151-Lng-A-T | 404  | chr14:52586850-52586950 |
| chr14 | 52619150 | 52619250 | 1065-Lng-C-T | 87   | chr14:52619150-52619250 |
| chr14 | 52688850 | 52688950 | 1065-Lng-A-T | 77   | chr14:52688850-52688950 |
| chr14 | 52699350 | 52699450 | 1151-Lng-A-T | 74   | chr14:52699350-52699450 |
| chr14 | 52704150 | 52704250 | 1100-Lng-A-T | 64   | chr14:52704150-52704250 |
| chr14 | 52719750 | 52719850 | 1223-Lng-B-T | 277  | chr14:52719750-52719850 |
| chr14 | 52843950 | 52844050 | 1072-Lng-A-T | 50   | chr14:52843950-52844050 |
| chr14 | 52850450 | 52850550 | 1223-Lng-D-T | 82   | chr14:52850450-52850550 |
| chr14 | 52874450 | 52874550 | 1223-Lng-B-T | 193  | chr14:52874450-52874550 |
| chr14 | 52902450 | 52902550 | 1167-Lng-A-T | 94   | chr14:52902450-52902550 |
| chr14 | 53117150 | 53117250 | 1004-Lng-A-T | 81   | chr14:53117150-53117250 |
| chr14 | 53299250 | 53299350 | 1065-Lng-A-T | 71   | chr14:53299250-53299350 |
| chr14 | 53375050 | 53375150 | 901-Lng-B-T  | 259  | chr14:53375050-53375150 |
| chr14 | 53697850 | 53697950 | 1152-Lng-A-T | 80   | chr14:53697850-53697950 |
| chr14 | 54548250 | 54548350 | 1065-Lng-A-T | 864  | chr14:54548250-54548350 |
| chr14 | 54716950 | 54717050 | 1223-Lng-A-T | 798  | chr14:54716950-54717050 |
| chr14 | 54798950 | 54799050 | 1090-Lng-B-T | 1005 | chr14:54798950-54799050 |
| chr14 | 55021850 | 55021950 | 1090-Lng-A-T | 89   | chr14:55021850-55021950 |
| chr14 | 55089550 | 55089650 | 1065-Lng-B-T | 43   | chr14:55089550-55089650 |
| chr14 | 55281850 | 55281950 | 1223-Lng-A-T | 57   | chr14:55281850-55281950 |
| chr14 | 55291150 | 55291250 | 1274-Lng-A-T | 143  | chr14:55291150-55291250 |
| chr14 | 55297550 | 55297650 | 1152-Lng-A-T | 96   | chr14:55297550-55297650 |
| chr14 | 55405350 | 55405450 | 1004-Lng-A-T | 52   | chr14:55405350-55405450 |
| chr14 | 55481350 | 55481450 | 1065-Lng-C-T | 971  | chr14:55481350-55481450 |
| chr14 | 55508650 | 55508750 | 901-Lng-A-T  | 633  | chr14:55508650-55508750 |

**Table S2: SB Insertion regions**

|       |          |          |              |      |                         |
|-------|----------|----------|--------------|------|-------------------------|
| chr14 | 55982050 | 55982150 | 1223-Lng-B-T | 53   | chr14:55982050-55982150 |
| chr14 | 56150050 | 56150150 | 1072-Lng-A-T | 226  | chr14:56150050-56150150 |
| chr14 | 56187150 | 56187250 | 901-Lng-B-T  | 38   | chr14:56187150-56187250 |
| chr14 | 56512450 | 56512550 | 901-Lng-A-T  | 76   | chr14:56512450-56512550 |
| chr14 | 57018850 | 57018950 | 1100-Lng-A-T | 118  | chr14:57018850-57018950 |
| chr14 | 57249950 | 57250050 | 1223-Lng-D-T | 44   | chr14:57249950-57250050 |
| chr14 | 57277050 | 57277150 | 901-Lng-C-T  | 299  | chr14:57277050-57277150 |
| chr14 | 57309550 | 57309650 | 1100-Lng-A-T | 129  | chr14:57309550-57309650 |
| chr14 | 57345950 | 57346050 | 1223-Lng-D-T | 1059 | chr14:57345950-57346050 |
| chr14 | 57361550 | 57361650 | 901-Lng-C-T  | 110  | chr14:57361550-57361650 |
| chr14 | 57392350 | 57392450 | 1151-Lng-A-T | 264  | chr14:57392350-57392450 |
| chr14 | 57394650 | 57394750 | 1065-Lng-B-T | 223  | chr14:57394650-57394750 |
| chr14 | 57528550 | 57528650 | 1004-Lng-A-T | 84   | chr14:57528550-57528650 |
| chr14 | 57558450 | 57558550 | 1065-Lng-A-T | 53   | chr14:57558450-57558550 |
| chr14 | 57567250 | 57567350 | 1090-Lng-A-T | 866  | chr14:57567250-57567350 |
| chr14 | 57671150 | 57671250 | 1100-Lng-A-T | 92   | chr14:57671150-57671250 |
| chr14 | 57684150 | 57684250 | 1223-Lng-D-T | 42   | chr14:57684150-57684250 |
| chr14 | 57866850 | 57866950 | 1151-Lng-A-T | 75   | chr14:57866850-57866950 |
| chr14 | 57958650 | 57958750 | 1151-Lng-A-T | 54   | chr14:57958650-57958750 |
| chr14 | 58086250 | 58086350 | 1223-Lng-C-T | 53   | chr14:58086250-58086350 |
| chr14 | 58137650 | 58137750 | 901-Lng-C-T  | 131  | chr14:58137650-58137750 |
| chr14 | 58249650 | 58249750 | 1100-Lng-A-T | 51   | chr14:58249650-58249750 |
| chr14 | 58374550 | 58374650 | 846-Lng-A-T  | 85   | chr14:58374550-58374650 |
| chr14 | 58467950 | 58468050 | 1152-Lng-A-T | 319  | chr14:58467950-58468050 |
| chr14 | 58479450 | 58479550 | 1223-Lng-B-T | 70   | chr14:58479450-58479550 |
| chr14 | 58484850 | 58484950 | 1065-Lng-B-T | 45   | chr14:58484850-58484950 |
| chr14 | 58512550 | 58512650 | 1274-Lng-A-T | 145  | chr14:58512550-58512650 |
| chr14 | 58583350 | 58583450 | 1100-Lng-A-T | 885  | chr14:58583350-58583450 |
| chr14 | 58614850 | 58614950 | 1223-Lng-C-T | 48   | chr14:58614850-58614950 |
| chr14 | 58664250 | 58664350 | 901-Lng-C-T  | 48   | chr14:58664250-58664350 |
| chr14 | 58794850 | 58794950 | 901-Lng-D-T  | 189  | chr14:58794850-58794950 |
| chr14 | 58806350 | 58806450 | 1065-Lng-A-T | 270  | chr14:58806350-58806450 |
| chr14 | 59116150 | 59116250 | 901-Lng-C-T  | 35   | chr14:59116150-59116250 |
| chr14 | 59872150 | 59872250 | 1065-Lng-C-T | 71   | chr14:59872150-59872250 |
| chr14 | 59971650 | 59971750 | 1065-Lng-B-T | 64   | chr14:59971650-59971750 |
| chr14 | 60147250 | 60147350 | 1072-Lng-A-T | 57   | chr14:60147250-60147350 |
| chr14 | 60157750 | 60157850 | 1188-Lng-A-T | 34   | chr14:60157750-60157850 |
| chr14 | 61258550 | 61258650 | 1223-Lng-D-T | 43   | chr14:61258550-61258650 |
| chr14 | 61260350 | 61260450 | 901-Lng-A-T  | 119  | chr14:61260350-61260450 |
| chr14 | 61284450 | 61284550 | 1223-Lng-B-T | 47   | chr14:61284450-61284550 |
| chr14 | 61330250 | 61330350 | 1188-Lng-A-T | 57   | chr14:61330250-61330350 |
| chr14 | 61393450 | 61393550 | 1188-Lng-A-T | 308  | chr14:61393450-61393550 |
| chr14 | 61461250 | 61461350 | 901-Lng-B-T  | 84   | chr14:61461250-61461350 |
| chr14 | 61527950 | 61528050 | 901-Lng-C-T  | 32   | chr14:61527950-61528050 |
| chr14 | 61605750 | 61605850 | 1223-Lng-C-T | 54   | chr14:61605750-61605850 |
| chr14 | 61982250 | 61982350 | 901-Lng-D-T  | 157  | chr14:61982250-61982350 |

**Table S2: SB Insertion regions**

|       |          |          |              |      |                         |
|-------|----------|----------|--------------|------|-------------------------|
| chr14 | 62032350 | 62032450 | 1223-Lng-B-T | 42   | chr14:62032350-62032450 |
| chr14 | 62036350 | 62036450 | 1065-Lng-A-T | 290  | chr14:62036350-62036450 |
| chr14 | 62040150 | 62040250 | 1223-Lng-C-T | 131  | chr14:62040150-62040250 |
| chr14 | 62043250 | 62043350 | 1223-Lng-D-T | 45   | chr14:62043250-62043350 |
| chr14 | 62242450 | 62242550 | 1167-Lng-A-T | 54   | chr14:62242450-62242550 |
| chr14 | 62251350 | 62251450 | 1065-Lng-C-T | 1064 | chr14:62251350-62251450 |
| chr14 | 62256450 | 62256550 | 1223-Lng-A-T | 1888 | chr14:62256450-62256550 |
| chr14 | 62281350 | 62281450 | 1090-Lng-B-T | 528  | chr14:62281350-62281450 |
| chr14 | 62339650 | 62339750 | 1090-Lng-A-T | 152  | chr14:62339650-62339750 |
| chr14 | 62749450 | 62749550 | 1065-Lng-C-T | 74   | chr14:62749450-62749550 |
| chr14 | 63138150 | 63138250 | 1151-Lng-A-T | 54   | chr14:63138150-63138250 |
| chr14 | 63321450 | 63321550 | 1167-Lng-A-T | 109  | chr14:63321450-63321550 |
| chr14 | 63325250 | 63325350 | 846-Lng-A-T  | 48   | chr14:63325250-63325350 |
| chr14 | 63341350 | 63341450 | 1223-Lng-D-T | 45   | chr14:63341350-63341450 |
| chr14 | 63351150 | 63351250 | 1090-Lng-A-T | 77   | chr14:63351150-63351250 |
| chr14 | 63352950 | 63353050 | 1274-Lng-A-T | 432  | chr14:63352950-63353050 |
| chr14 | 63360650 | 63360750 | 1223-Lng-B-T | 46   | chr14:63360650-63360750 |
| chr14 | 63368050 | 63368150 | 1100-Lng-A-T | 78   | chr14:63368050-63368150 |
| chr14 | 63368250 | 63368350 | 1100-Lng-A-T | 108  | chr14:63368250-63368350 |
| chr14 | 63463550 | 63463650 | 1100-Lng-A-T | 83   | chr14:63463550-63463650 |
| chr14 | 63495150 | 63495250 | 1274-Lng-A-T | 75   | chr14:63495150-63495250 |
| chr14 | 63536350 | 63536450 | 1072-Lng-A-T | 48   | chr14:63536350-63536450 |
| chr14 | 63779950 | 63780050 | 1152-Lng-A-T | 60   | chr14:63779950-63780050 |
| chr14 | 63844250 | 63844350 | 1223-Lng-C-T | 45   | chr14:63844250-63844350 |
| chr14 | 64082050 | 64082150 | 1152-Lng-A-T | 49   | chr14:64082050-64082150 |
| chr14 | 64161750 | 64161850 | 1090-Lng-A-T | 50   | chr14:64161750-64161850 |
| chr14 | 65118850 | 65118950 | 1167-Lng-A-T | 60   | chr14:65118850-65118950 |
| chr14 | 65240650 | 65240750 | 1065-Lng-B-T | 44   | chr14:65240650-65240750 |
| chr14 | 65334850 | 65334950 | 1004-Lng-A-T | 74   | chr14:65334850-65334950 |
| chr14 | 65385650 | 65385750 | 1274-Lng-A-T | 121  | chr14:65385650-65385750 |
| chr14 | 65393550 | 65393650 | 901-Lng-A-T  | 87   | chr14:65393550-65393650 |
| chr14 | 65534550 | 65534650 | 1151-Lng-A-T | 276  | chr14:65534550-65534650 |
| chr14 | 65545850 | 65545950 | 846-Lng-A-T  | 115  | chr14:65545850-65545950 |
| chr14 | 65559350 | 65559450 | 1090-Lng-A-T | 49   | chr14:65559350-65559450 |
| chr14 | 65706950 | 65707050 | 1223-Lng-B-T | 59   | chr14:65706950-65707050 |
| chr14 | 65894350 | 65894450 | 1223-Lng-C-T | 49   | chr14:65894350-65894450 |
| chr14 | 66016450 | 66016550 | 1274-Lng-A-T | 69   | chr14:66016450-66016550 |
| chr14 | 66079450 | 66079550 | 1223-Lng-D-T | 41   | chr14:66079450-66079550 |
| chr14 | 66188150 | 66188250 | 1223-Lng-C-T | 89   | chr14:66188150-66188250 |
| chr14 | 66194350 | 66194450 | 1151-Lng-A-T | 238  | chr14:66194350-66194450 |
| chr14 | 66411050 | 66411150 | 901-Lng-C-T  | 61   | chr14:66411050-66411150 |
| chr14 | 66544350 | 66544450 | 1072-Lng-A-T | 67   | chr14:66544350-66544450 |
| chr14 | 67272850 | 67272950 | 1223-Lng-A-T | 113  | chr14:67272850-67272950 |
| chr14 | 67409250 | 67409350 | 1065-Lng-A-T | 418  | chr14:67409250-67409350 |
| chr14 | 67481750 | 67481850 | 1072-Lng-A-T | 103  | chr14:67481750-67481850 |
| chr14 | 67542850 | 67542950 | 1100-Lng-A-T | 52   | chr14:67542850-67542950 |

**Table S2: SB Insertion regions**

|       |          |          |              |      |                         |
|-------|----------|----------|--------------|------|-------------------------|
| chr14 | 67625050 | 67625150 | 1100-Lng-A-T | 60   | chr14:67625050-67625150 |
| chr14 | 67658450 | 67658550 | 1274-Lng-A-T | 169  | chr14:67658450-67658550 |
| chr14 | 67687450 | 67687550 | 1065-Lng-A-T | 119  | chr14:67687450-67687550 |
| chr14 | 68025350 | 68025450 | 1090-Lng-A-T | 913  | chr14:68025350-68025450 |
| chr14 | 68106450 | 68106550 | 1223-Lng-D-T | 85   | chr14:68106450-68106550 |
| chr14 | 68201050 | 68201150 | 1065-Lng-A-T | 53   | chr14:68201050-68201150 |
| chr14 | 68375650 | 68375750 | 1090-Lng-A-T | 46   | chr14:68375650-68375750 |
| chr14 | 68376250 | 68376350 | 1090-Lng-A-T | 57   | chr14:68376250-68376350 |
| chr14 | 68376350 | 68376450 | 1274-Lng-A-T | 6463 | chr14:68376350-68376450 |
| chr14 | 68422150 | 68422250 | 1223-Lng-D-T | 50   | chr14:68422150-68422250 |
| chr14 | 68424750 | 68424850 | 1223-Lng-B-T | 49   | chr14:68424750-68424850 |
| chr14 | 68500350 | 68500450 | 1188-Lng-A-T | 42   | chr14:68500350-68500450 |
| chr14 | 68509050 | 68509150 | 901-Lng-C-T  | 228  | chr14:68509050-68509150 |
| chr14 | 68596250 | 68596350 | 1167-Lng-A-T | 2221 | chr14:68596250-68596350 |
| chr14 | 69067850 | 69067950 | 1274-Lng-A-T | 57   | chr14:69067850-69067950 |
| chr14 | 69143850 | 69143950 | 1065-Lng-B-T | 40   | chr14:69143850-69143950 |
| chr14 | 69247750 | 69247850 | 1065-Lng-B-T | 55   | chr14:69247750-69247850 |
| chr14 | 69438850 | 69438950 | 1065-Lng-B-T | 94   | chr14:69438850-69438950 |
| chr14 | 69516350 | 69516450 | 1223-Lng-A-T | 60   | chr14:69516350-69516450 |
| chr14 | 69765950 | 69766050 | 846-Lng-A-T  | 110  | chr14:69765950-69766050 |
| chr14 | 70012350 | 70012450 | 901-Lng-C-T  | 94   | chr14:70012350-70012450 |
| chr14 | 70352050 | 70352150 | 1072-Lng-A-T | 115  | chr14:70352050-70352150 |
| chr14 | 70515950 | 70516050 | 846-Lng-A-T  | 73   | chr14:70515950-70516050 |
| chr14 | 70536350 | 70536450 | 1090-Lng-A-T | 50   | chr14:70536350-70536450 |
| chr14 | 70557750 | 70557850 | 1223-Lng-A-T | 141  | chr14:70557750-70557850 |
| chr14 | 70627950 | 70628050 | 1223-Lng-D-T | 44   | chr14:70627950-70628050 |
| chr14 | 70677950 | 70678050 | 1065-Lng-B-T | 48   | chr14:70677950-70678050 |
| chr14 | 70699150 | 70699250 | 1274-Lng-A-T | 112  | chr14:70699150-70699250 |
| chr14 | 70743750 | 70743850 | 1072-Lng-A-T | 145  | chr14:70743750-70743850 |
| chr14 | 70875550 | 70875650 | 1100-Lng-A-T | 114  | chr14:70875550-70875650 |
| chr14 | 71049550 | 71049650 | 1152-Lng-A-T | 387  | chr14:71049550-71049650 |
| chr14 | 71072450 | 71072550 | 901-Lng-A-T  | 153  | chr14:71072450-71072550 |
| chr14 | 71119250 | 71119350 | 1004-Lng-A-T | 65   | chr14:71119250-71119350 |
| chr14 | 71390850 | 71390950 | 1223-Lng-B-T | 36   | chr14:71390850-71390950 |
| chr14 | 71778550 | 71778650 | 1151-Lng-A-T | 129  | chr14:71778550-71778650 |
| chr14 | 71952450 | 71952550 | 846-Lng-A-T  | 85   | chr14:71952450-71952550 |
| chr14 | 71967550 | 71967650 | 1223-Lng-D-T | 42   | chr14:71967550-71967650 |
| chr14 | 71985650 | 71985750 | 1065-Lng-A-T | 82   | chr14:71985650-71985750 |
| chr14 | 72145950 | 72146050 | 846-Lng-A-T  | 93   | chr14:72145950-72146050 |
| chr14 | 72233850 | 72233950 | 901-Lng-B-T  | 135  | chr14:72233850-72233950 |
| chr14 | 72243850 | 72243950 | 901-Lng-C-T  | 64   | chr14:72243850-72243950 |
| chr14 | 72628450 | 72628550 | 1223-Lng-B-T | 53   | chr14:72628450-72628550 |
| chr14 | 72834550 | 72834650 | 901-Lng-C-T  | 33   | chr14:72834550-72834650 |
| chr14 | 72915750 | 72915850 | 1004-Lng-A-T | 52   | chr14:72915750-72915850 |
| chr14 | 72952750 | 72952850 | 1152-Lng-A-T | 56   | chr14:72952750-72952850 |
| chr14 | 73023550 | 73023650 | 1223-Lng-C-T | 467  | chr14:73023550-73023650 |

**Table S2: SB Insertion regions**

|       |          |          |              |      |                         |
|-------|----------|----------|--------------|------|-------------------------|
| chr14 | 73097150 | 73097250 | 1274-Lng-A-T | 77   | chr14:73097150-73097250 |
| chr14 | 73126850 | 73126950 | 1004-Lng-A-T | 76   | chr14:73126850-73126950 |
| chr14 | 73454950 | 73455050 | 901-Lng-A-T  | 110  | chr14:73454950-73455050 |
| chr14 | 73463150 | 73463250 | 1065-Lng-B-T | 45   | chr14:73463150-73463250 |
| chr14 | 73539850 | 73539950 | 1167-Lng-A-T | 99   | chr14:73539850-73539950 |
| chr14 | 73568250 | 73568350 | 1072-Lng-A-T | 57   | chr14:73568250-73568350 |
| chr14 | 73585050 | 73585150 | 1072-Lng-A-T | 90   | chr14:73585050-73585150 |
| chr14 | 73640050 | 73640150 | 1223-Lng-D-T | 68   | chr14:73640050-73640150 |
| chr14 | 73717250 | 73717350 | 1065-Lng-B-T | 69   | chr14:73717250-73717350 |
| chr14 | 73764950 | 73765050 | 1090-Lng-A-T | 50   | chr14:73764950-73765050 |
| chr14 | 73766350 | 73766450 | 901-Lng-A-T  | 62   | chr14:73766350-73766450 |
| chr14 | 73767050 | 73767150 | 901-Lng-C-T  | 29   | chr14:73767050-73767150 |
| chr14 | 73777550 | 73777650 | 901-Lng-A-T  | 171  | chr14:73777550-73777650 |
| chr14 | 73780950 | 73781050 | 1065-Lng-B-T | 60   | chr14:73780950-73781050 |
| chr14 | 73841850 | 73841950 | 901-Lng-C-T  | 2099 | chr14:73841850-73841950 |
| chr14 | 73991150 | 73991250 | 1065-Lng-B-T | 477  | chr14:73991150-73991250 |
| chr14 | 74080050 | 74080150 | 901-Lng-B-T  | 45   | chr14:74080050-74080150 |
| chr14 | 74316750 | 74316850 | 846-Lng-A-T  | 608  | chr14:74316750-74316850 |
| chr14 | 74854550 | 74854650 | 1151-Lng-A-T | 116  | chr14:74854550-74854650 |
| chr14 | 75016950 | 75017050 | 1152-Lng-A-T | 192  | chr14:75016950-75017050 |
| chr14 | 75184550 | 75184650 | 1223-Lng-A-T | 679  | chr14:75184550-75184650 |
| chr14 | 75205350 | 75205450 | 1223-Lng-D-T | 323  | chr14:75205350-75205450 |
| chr14 | 75250750 | 75250850 | 1223-Lng-D-T | 50   | chr14:75250750-75250850 |
| chr14 | 75316750 | 75316850 | 1152-Lng-A-T | 95   | chr14:75316750-75316850 |
| chr14 | 75403150 | 75403250 | 901-Lng-C-T  | 45   | chr14:75403150-75403250 |
| chr14 | 75525650 | 75525750 | 1188-Lng-A-T | 66   | chr14:75525650-75525750 |
| chr14 | 75563450 | 75563550 | 1223-Lng-D-T | 97   | chr14:75563450-75563550 |
| chr14 | 75589250 | 75589350 | 1072-Lng-A-T | 121  | chr14:75589250-75589350 |
| chr14 | 75621250 | 75621350 | 1223-Lng-C-T | 58   | chr14:75621250-75621350 |
| chr14 | 75709950 | 75710050 | 1223-Lng-B-T | 40   | chr14:75709950-75710050 |
| chr14 | 75770350 | 75770450 | 901-Lng-C-T  | 82   | chr14:75770350-75770450 |
| chr14 | 76082750 | 76082850 | 901-Lng-A-T  | 50   | chr14:76082750-76082850 |
| chr14 | 76128950 | 76129050 | 901-Lng-D-T  | 458  | chr14:76128950-76129050 |
| chr14 | 76131950 | 76132050 | 901-Lng-A-T  | 59   | chr14:76131950-76132050 |
| chr14 | 76134750 | 76134850 | 901-Lng-C-T  | 40   | chr14:76134750-76134850 |
| chr14 | 76138250 | 76138350 | 1072-Lng-A-T | 162  | chr14:76138250-76138350 |
| chr14 | 76283150 | 76283250 | 1004-Lng-A-T | 67   | chr14:76283150-76283250 |
| chr14 | 76323950 | 76324050 | 1090-Lng-A-T | 102  | chr14:76323950-76324050 |
| chr14 | 76337550 | 76337650 | 1274-Lng-A-T | 78   | chr14:76337550-76337650 |
| chr14 | 76380650 | 76380750 | 1167-Lng-A-T | 56   | chr14:76380650-76380750 |
| chr14 | 76387450 | 76387550 | 1151-Lng-A-T | 85   | chr14:76387450-76387550 |
| chr14 | 76481050 | 76481150 | 1223-Lng-B-T | 40   | chr14:76481050-76481150 |
| chr14 | 76519150 | 76519250 | 1065-Lng-B-T | 88   | chr14:76519150-76519250 |
| chr14 | 76780850 | 76780950 | 1065-Lng-A-T | 44   | chr14:76780850-76780950 |
| chr14 | 76788750 | 76788850 | 1065-Lng-C-T | 81   | chr14:76788750-76788850 |
| chr14 | 76864550 | 76864650 | 1004-Lng-A-T | 78   | chr14:76864550-76864650 |

**Table S2: SB Insertion regions**

|       |          |          |              |      |                         |
|-------|----------|----------|--------------|------|-------------------------|
| chr14 | 77008650 | 77008750 | 1090-Lng-A-T | 83   | chr14:77008650-77008750 |
| chr14 | 77181650 | 77181750 | 1004-Lng-A-T | 284  | chr14:77181650-77181750 |
| chr14 | 77381250 | 77381350 | 901-Lng-B-T  | 76   | chr14:77381250-77381350 |
| chr14 | 77437550 | 77437650 | 1065-Lng-A-T | 47   | chr14:77437550-77437650 |
| chr14 | 77485250 | 77485350 | 1152-Lng-A-T | 45   | chr14:77485250-77485350 |
| chr14 | 77949250 | 77949350 | 901-Lng-A-T  | 174  | chr14:77949250-77949350 |
| chr14 | 78158150 | 78158250 | 1065-Lng-A-T | 80   | chr14:78158150-78158250 |
| chr14 | 78382350 | 78382450 | 1152-Lng-A-T | 78   | chr14:78382350-78382450 |
| chr14 | 78819250 | 78819350 | 1223-Lng-A-T | 54   | chr14:78819250-78819350 |
| chr14 | 78888850 | 78888950 | 1274-Lng-A-T | 65   | chr14:78888850-78888950 |
| chr14 | 78902650 | 78902750 | 1223-Lng-C-T | 47   | chr14:78902650-78902750 |
| chr14 | 78910050 | 78910150 | 1100-Lng-B-T | 53   | chr14:78910050-78910150 |
| chr14 | 79338150 | 79338250 | 1004-Lng-A-T | 61   | chr14:79338150-79338250 |
| chr14 | 79361150 | 79361250 | 901-Lng-D-T  | 783  | chr14:79361150-79361250 |
| chr14 | 79361650 | 79361750 | 846-Lng-A-T  | 109  | chr14:79361650-79361750 |
| chr14 | 79394450 | 79394550 | 1223-Lng-D-T | 50   | chr14:79394450-79394550 |
| chr14 | 79483950 | 79484050 | 1223-Lng-C-T | 1738 | chr14:79483950-79484050 |
| chr14 | 79492950 | 79493050 | 1274-Lng-A-T | 69   | chr14:79492950-79493050 |
| chr14 | 79541750 | 79541850 | 1223-Lng-D-T | 51   | chr14:79541750-79541850 |
| chr14 | 79682150 | 79682250 | 1090-Lng-B-T | 131  | chr14:79682150-79682250 |
| chr14 | 79724450 | 79724550 | 1072-Lng-A-T | 57   | chr14:79724450-79724550 |
| chr14 | 79736550 | 79736650 | 1188-Lng-A-T | 40   | chr14:79736550-79736650 |
| chr14 | 79745450 | 79745550 | 1223-Lng-B-T | 111  | chr14:79745450-79745550 |
| chr14 | 79747250 | 79747350 | 901-Lng-A-T  | 69   | chr14:79747250-79747350 |
| chr14 | 79776950 | 79777050 | 1065-Lng-C-T | 70   | chr14:79776950-79777050 |
| chr14 | 79886750 | 79886850 | 1223-Lng-B-T | 35   | chr14:79886750-79886850 |
| chr14 | 79902950 | 79903050 | 1065-Lng-A-T | 69   | chr14:79902950-79903050 |
| chr14 | 79942650 | 79942750 | 1152-Lng-A-T | 53   | chr14:79942650-79942750 |
| chr14 | 79950550 | 79950650 | 1152-Lng-A-T | 33   | chr14:79950550-79950650 |
| chr14 | 79957150 | 79957250 | 1223-Lng-B-T | 178  | chr14:79957150-79957250 |
| chr14 | 79983150 | 79983250 | 1223-Lng-B-T | 47   | chr14:79983150-79983250 |
| chr14 | 79988350 | 79988450 | 1167-Lng-A-T | 154  | chr14:79988350-79988450 |
| chr14 | 80056950 | 80057050 | 846-Lng-A-T  | 179  | chr14:80056950-80057050 |
| chr14 | 80314150 | 80314250 | 1223-Lng-A-T | 99   | chr14:80314150-80314250 |
| chr14 | 80401150 | 80401250 | 846-Lng-A-T  | 46   | chr14:80401150-80401250 |
| chr14 | 80736250 | 80736350 | 1065-Lng-B-T | 96   | chr14:80736250-80736350 |
| chr14 | 80736350 | 80736450 | 1065-Lng-A-T | 80   | chr14:80736350-80736450 |
| chr14 | 80743850 | 80743950 | 1065-Lng-A-T | 79   | chr14:80743850-80743950 |
| chr14 | 80963650 | 80963750 | 1223-Lng-A-T | 67   | chr14:80963650-80963750 |
| chr14 | 80978850 | 80978950 | 1065-Lng-B-T | 97   | chr14:80978850-80978950 |
| chr14 | 81016050 | 81016150 | 1004-Lng-A-T | 934  | chr14:81016050-81016150 |
| chr14 | 81039350 | 81039450 | 901-Lng-B-T  | 67   | chr14:81039350-81039450 |
| chr14 | 81264950 | 81265050 | 1090-Lng-A-T | 439  | chr14:81264950-81265050 |
| chr14 | 81342750 | 81342850 | 1152-Lng-A-T | 34   | chr14:81342750-81342850 |
| chr14 | 81386350 | 81386450 | 1274-Lng-A-T | 56   | chr14:81386350-81386450 |
| chr14 | 81415850 | 81415950 | 901-Lng-B-T  | 60   | chr14:81415850-81415950 |

**Table S2: SB Insertion regions**

|       |          |          |              |     |                         |
|-------|----------|----------|--------------|-----|-------------------------|
| chr14 | 81418950 | 81419050 | 1065-Lng-B-T | 67  | chr14:81418950-81419050 |
| chr14 | 81449850 | 81449950 | 846-Lng-A-T  | 48  | chr14:81449850-81449950 |
| chr14 | 81484850 | 81484950 | 1223-Lng-D-T | 46  | chr14:81484850-81484950 |
| chr14 | 81651950 | 81652050 | 1004-Lng-A-T | 98  | chr14:81651950-81652050 |
| chr14 | 81778750 | 81778850 | 1152-Lng-A-T | 91  | chr14:81778750-81778850 |
| chr14 | 81784650 | 81784750 | 1065-Lng-B-T | 89  | chr14:81784650-81784750 |
| chr14 | 81812850 | 81812950 | 901-Lng-A-T  | 60  | chr14:81812850-81812950 |
| chr14 | 81839850 | 81839950 | 1065-Lng-A-T | 39  | chr14:81839850-81839950 |
| chr14 | 81864850 | 81864950 | 1072-Lng-A-T | 52  | chr14:81864850-81864950 |
| chr14 | 81964950 | 81965050 | 1223-Lng-B-T | 53  | chr14:81964950-81965050 |
| chr14 | 82337750 | 82337850 | 846-Lng-A-T  | 117 | chr14:82337750-82337850 |
| chr14 | 82371250 | 82371350 | 1151-Lng-A-T | 56  | chr14:82371250-82371350 |
| chr14 | 82540350 | 82540450 | 1188-Lng-A-T | 61  | chr14:82540350-82540450 |
| chr14 | 82633850 | 82633950 | 1065-Lng-B-T | 80  | chr14:82633850-82633950 |
| chr14 | 82648250 | 82648350 | 1167-Lng-A-T | 69  | chr14:82648250-82648350 |
| chr14 | 82954050 | 82954150 | 1223-Lng-D-T | 40  | chr14:82954050-82954150 |
| chr14 | 82968450 | 82968550 | 1065-Lng-B-T | 64  | chr14:82968450-82968550 |
| chr14 | 83061550 | 83061650 | 1223-Lng-B-T | 266 | chr14:83061550-83061650 |
| chr14 | 83160750 | 83160850 | 846-Lng-A-T  | 196 | chr14:83160750-83160850 |
| chr14 | 83556550 | 83556650 | 1065-Lng-C-T | 77  | chr14:83556550-83556650 |
| chr14 | 83771950 | 83772050 | 1072-Lng-A-T | 117 | chr14:83771950-83772050 |
| chr14 | 83949350 | 83949450 | 901-Lng-C-T  | 104 | chr14:83949350-83949450 |
| chr14 | 84204750 | 84204850 | 1167-Lng-A-T | 63  | chr14:84204750-84204850 |
| chr14 | 84206650 | 84206750 | 1152-Lng-A-T | 83  | chr14:84206650-84206750 |
| chr14 | 84389750 | 84389850 | 1065-Lng-A-T | 401 | chr14:84389750-84389850 |
| chr14 | 84508950 | 84509050 | 1065-Lng-A-T | 70  | chr14:84508950-84509050 |
| chr14 | 84606750 | 84606850 | 1152-Lng-A-T | 44  | chr14:84606750-84606850 |
| chr14 | 84654550 | 84654650 | 1065-Lng-C-T | 63  | chr14:84654550-84654650 |
| chr14 | 84656950 | 84657050 | 901-Lng-C-T  | 50  | chr14:84656950-84657050 |
| chr14 | 84692050 | 84692150 | 846-Lng-A-T  | 68  | chr14:84692050-84692150 |
| chr14 | 84836850 | 84836950 | 1223-Lng-A-T | 466 | chr14:84836850-84836950 |
| chr14 | 84872950 | 84873050 | 1004-Lng-A-T | 87  | chr14:84872950-84873050 |
| chr14 | 84934450 | 84934550 | 1065-Lng-A-T | 55  | chr14:84934450-84934550 |
| chr14 | 84969650 | 84969750 | 1100-Lng-A-T | 58  | chr14:84969650-84969750 |
| chr14 | 85039550 | 85039650 | 901-Lng-D-T  | 175 | chr14:85039550-85039650 |
| chr14 | 85215550 | 85215650 | 1223-Lng-A-T | 55  | chr14:85215550-85215650 |
| chr14 | 85238450 | 85238550 | 1065-Lng-A-T | 83  | chr14:85238450-85238550 |
| chr14 | 85350150 | 85350250 | 1223-Lng-B-T | 233 | chr14:85350150-85350250 |
| chr14 | 85462750 | 85462850 | 1004-Lng-A-T | 54  | chr14:85462750-85462850 |
| chr14 | 85587350 | 85587450 | 846-Lng-A-T  | 243 | chr14:85587350-85587450 |
| chr14 | 85739450 | 85739550 | 901-Lng-A-T  | 58  | chr14:85739450-85739550 |
| chr14 | 85740150 | 85740250 | 1152-Lng-A-T | 45  | chr14:85740150-85740250 |
| chr14 | 85761450 | 85761550 | 1090-Lng-A-T | 137 | chr14:85761450-85761550 |
| chr14 | 85775750 | 85775850 | 901-Lng-A-T  | 65  | chr14:85775750-85775850 |
| chr14 | 86087950 | 86088050 | 1223-Lng-A-T | 122 | chr14:86087950-86088050 |
| chr14 | 86107650 | 86107750 | 1072-Lng-A-T | 78  | chr14:86107650-86107750 |



**Table S2: SB Insertion regions**

|       |          |          |              |     |                         |
|-------|----------|----------|--------------|-----|-------------------------|
| chr14 | 86347750 | 86347850 | 1223-Lng-D-T | 42  | chr14:86347750-86347850 |
| chr14 | 86728250 | 86728350 | 1065-Lng-C-T | 89  | chr14:86728250-86728350 |
| chr14 | 86743950 | 86744050 | 901-Lng-C-T  | 77  | chr14:86743950-86744050 |
| chr14 | 86862450 | 86862550 | 1065-Lng-B-T | 90  | chr14:86862450-86862550 |
| chr14 | 87231550 | 87231650 | 1223-Lng-C-T | 48  | chr14:87231550-87231650 |
| chr14 | 87276750 | 87276850 | 1090-Lng-A-T | 77  | chr14:87276750-87276850 |
| chr14 | 87508850 | 87508950 | 1072-Lng-A-T | 124 | chr14:87508850-87508950 |
| chr14 | 87817450 | 87817550 | 1100-Lng-A-T | 102 | chr14:87817450-87817550 |
| chr14 | 87817850 | 87817950 | 1152-Lng-A-T | 133 | chr14:87817850-87817950 |
| chr14 | 87837250 | 87837350 | 1188-Lng-A-T | 777 | chr14:87837250-87837350 |
| chr14 | 87850250 | 87850350 | 1004-Lng-A-T | 66  | chr14:87850250-87850350 |
| chr14 | 87896250 | 87896350 | 901-Lng-D-T  | 66  | chr14:87896250-87896350 |
| chr14 | 87935750 | 87935850 | 1065-Lng-B-T | 47  | chr14:87935750-87935850 |
| chr14 | 88036450 | 88036550 | 1274-Lng-A-T | 58  | chr14:88036450-88036550 |
| chr14 | 88051750 | 88051850 | 901-Lng-C-T  | 155 | chr14:88051750-88051850 |
| chr14 | 88055050 | 88055150 | 846-Lng-A-T  | 48  | chr14:88055050-88055150 |
| chr14 | 88083950 | 88084050 | 1065-Lng-B-T | 191 | chr14:88083950-88084050 |
| chr14 | 88454450 | 88454550 | 901-Lng-A-T  | 145 | chr14:88454450-88454550 |
| chr14 | 88539150 | 88539250 | 1004-Lng-A-T | 84  | chr14:88539150-88539250 |
| chr14 | 88566450 | 88566550 | 1090-Lng-B-T | 385 | chr14:88566450-88566550 |
| chr14 | 88591750 | 88591850 | 1004-Lng-A-T | 63  | chr14:88591750-88591850 |
| chr14 | 88685350 | 88685450 | 846-Lng-A-T  | 43  | chr14:88685350-88685450 |
| chr14 | 88706350 | 88706450 | 1167-Lng-A-T | 61  | chr14:88706350-88706450 |
| chr14 | 88786750 | 88786850 | 901-Lng-D-T  | 207 | chr14:88786750-88786850 |
| chr14 | 88790650 | 88790750 | 1065-Lng-A-T | 605 | chr14:88790650-88790750 |
| chr14 | 88942250 | 88942350 | 1004-Lng-A-T | 51  | chr14:88942250-88942350 |
| chr14 | 88953850 | 88953950 | 1223-Lng-A-T | 131 | chr14:88953850-88953950 |
| chr14 | 89008050 | 89008150 | 846-Lng-A-T  | 266 | chr14:89008050-89008150 |
| chr14 | 89009250 | 89009350 | 901-Lng-B-T  | 57  | chr14:89009250-89009350 |
| chr14 | 89051150 | 89051250 | 1100-Lng-A-T | 209 | chr14:89051150-89051250 |
| chr14 | 89271950 | 89272050 | 1065-Lng-B-T | 88  | chr14:89271950-89272050 |
| chr14 | 89308150 | 89308250 | 1004-Lng-A-T | 334 | chr14:89308150-89308250 |
| chr14 | 89745050 | 89745150 | 901-Lng-C-T  | 70  | chr14:89745050-89745150 |
| chr14 | 89916750 | 89916850 | 846-Lng-A-T  | 177 | chr14:89916750-89916850 |
| chr14 | 89953650 | 89953750 | 1004-Lng-A-T | 126 | chr14:89953650-89953750 |
| chr14 | 90001350 | 90001450 | 1004-Lng-A-T | 75  | chr14:90001350-90001450 |
| chr14 | 90063850 | 90063950 | 901-Lng-A-T  | 141 | chr14:90063850-90063950 |
| chr14 | 90099550 | 90099650 | 1223-Lng-B-T | 236 | chr14:90099550-90099650 |
| chr14 | 90235050 | 90235150 | 1274-Lng-A-T | 162 | chr14:90235050-90235150 |
| chr14 | 90325850 | 90325950 | 1065-Lng-C-T | 272 | chr14:90325850-90325950 |
| chr14 | 90347650 | 90347750 | 1065-Lng-A-T | 75  | chr14:90347650-90347750 |
| chr14 | 90460350 | 90460450 | 901-Lng-A-T  | 97  | chr14:90460350-90460450 |
| chr14 | 90601450 | 90601550 | 1152-Lng-A-T | 42  | chr14:90601450-90601550 |
| chr14 | 90911750 | 90911850 | 1152-Lng-A-T | 192 | chr14:90911750-90911850 |
| chr14 | 91061050 | 91061150 | 1152-Lng-A-T | 62  | chr14:91061050-91061150 |
| chr14 | 91234950 | 91235050 | 1065-Lng-A-T | 78  | chr14:91234950-91235050 |

**Table S2: SB Insertion regions**

|       |          |          |              |     |                         |
|-------|----------|----------|--------------|-----|-------------------------|
| chr14 | 91256350 | 91256450 | 1152-Lng-A-T | 66  | chr14:91256350-91256450 |
| chr14 | 91270850 | 91270950 | 1223-Lng-B-T | 47  | chr14:91270850-91270950 |
| chr14 | 91352950 | 91353050 | 901-Lng-A-T  | 55  | chr14:91352950-91353050 |
| chr14 | 91357150 | 91357250 | 1274-Lng-A-T | 56  | chr14:91357150-91357250 |
| chr14 | 91581250 | 91581350 | 1223-Lng-B-T | 35  | chr14:91581250-91581350 |
| chr14 | 91589650 | 91589750 | 1152-Lng-A-T | 41  | chr14:91589650-91589750 |
| chr14 | 91721850 | 91721950 | 1065-Lng-B-T | 68  | chr14:91721850-91721950 |
| chr14 | 91871450 | 91871550 | 901-Lng-B-T  | 59  | chr14:91871450-91871550 |
| chr14 | 91874250 | 91874350 | 1065-Lng-A-T | 67  | chr14:91874250-91874350 |
| chr14 | 91907250 | 91907350 | 901-Lng-C-T  | 127 | chr14:91907250-91907350 |
| chr14 | 92000250 | 92000350 | 1065-Lng-B-T | 450 | chr14:92000250-92000350 |
| chr14 | 92301350 | 92301450 | 846-Lng-A-T  | 164 | chr14:92301350-92301450 |
| chr14 | 92307850 | 92307950 | 846-Lng-A-T  | 130 | chr14:92307850-92307950 |
| chr14 | 92384850 | 92384950 | 1004-Lng-A-T | 80  | chr14:92384850-92384950 |
| chr14 | 92776350 | 92776450 | 1090-Lng-A-T | 129 | chr14:92776350-92776450 |
| chr14 | 92815650 | 92815750 | 846-Lng-A-T  | 46  | chr14:92815650-92815750 |
| chr14 | 92873450 | 92873550 | 1065-Lng-A-T | 111 | chr14:92873450-92873550 |
| chr14 | 93073750 | 93073850 | 1223-Lng-B-T | 36  | chr14:93073750-93073850 |
| chr14 | 93092350 | 93092450 | 901-Lng-B-T  | 266 | chr14:93092350-93092450 |
| chr14 | 93164050 | 93164150 | 1223-Lng-A-T | 99  | chr14:93164050-93164150 |
| chr14 | 93204450 | 93204550 | 1100-Lng-A-T | 77  | chr14:93204450-93204550 |
| chr14 | 93259750 | 93259850 | 1065-Lng-C-T | 76  | chr14:93259750-93259850 |
| chr14 | 93353350 | 93353450 | 1223-Lng-A-T | 80  | chr14:93353350-93353450 |
| chr14 | 93454050 | 93454150 | 846-Lng-A-T  | 116 | chr14:93454050-93454150 |
| chr14 | 93543750 | 93543850 | 1223-Lng-B-T | 109 | chr14:93543750-93543850 |
| chr14 | 93639850 | 93639950 | 1072-Lng-A-T | 68  | chr14:93639850-93639950 |
| chr14 | 93665650 | 93665750 | 1223-Lng-B-T | 58  | chr14:93665650-93665750 |
| chr14 | 93708550 | 93708650 | 1223-Lng-B-T | 45  | chr14:93708550-93708650 |
| chr14 | 93722550 | 93722650 | 1065-Lng-A-T | 46  | chr14:93722550-93722650 |
| chr14 | 93733750 | 93733850 | 1223-Lng-B-T | 41  | chr14:93733750-93733850 |
| chr14 | 93954450 | 93954550 | 1223-Lng-D-T | 44  | chr14:93954450-93954550 |
| chr14 | 94010250 | 94010350 | 1100-Lng-A-T | 51  | chr14:94010250-94010350 |
| chr14 | 94128350 | 94128450 | 1223-Lng-A-T | 55  | chr14:94128350-94128450 |
| chr14 | 94150350 | 94150450 | 1065-Lng-A-T | 45  | chr14:94150350-94150450 |
| chr14 | 94221150 | 94221250 | 846-Lng-A-T  | 70  | chr14:94221150-94221250 |
| chr14 | 94320050 | 94320150 | 1004-Lng-A-T | 122 | chr14:94320050-94320150 |
| chr14 | 94418450 | 94418550 | 901-Lng-D-T  | 64  | chr14:94418450-94418550 |
| chr14 | 94505150 | 94505250 | 901-Lng-B-T  | 102 | chr14:94505150-94505250 |
| chr14 | 94647050 | 94647150 | 1152-Lng-A-T | 44  | chr14:94647050-94647150 |
| chr14 | 94689850 | 94689950 | 1152-Lng-A-T | 40  | chr14:94689850-94689950 |
| chr14 | 94725850 | 94725950 | 1152-Lng-A-T | 85  | chr14:94725850-94725950 |
| chr14 | 94776250 | 94776350 | 901-Lng-B-T  | 186 | chr14:94776250-94776350 |
| chr14 | 95008150 | 95008250 | 1167-Lng-A-T | 77  | chr14:95008150-95008250 |
| chr14 | 95052550 | 95052650 | 846-Lng-A-T  | 47  | chr14:95052550-95052650 |
| chr14 | 95071950 | 95072050 | 1004-Lng-A-T | 52  | chr14:95071950-95072050 |
| chr14 | 95129450 | 95129550 | 1090-Lng-A-T | 48  | chr14:95129450-95129550 |

**Table S2: SB Insertion regions**

|       |          |          |              |      |                         |
|-------|----------|----------|--------------|------|-------------------------|
| chr14 | 95139250 | 95139350 | 1100-Lng-A-T | 69   | chr14:95139250-95139350 |
| chr14 | 95280050 | 95280150 | 1100-Lng-A-T | 67   | chr14:95280050-95280150 |
| chr14 | 95448750 | 95448850 | 846-Lng-A-T  | 131  | chr14:95448750-95448850 |
| chr14 | 95533250 | 95533350 | 1065-Lng-C-T | 67   | chr14:95533250-95533350 |
| chr14 | 95634750 | 95634850 | 1151-Lng-A-T | 81   | chr14:95634750-95634850 |
| chr14 | 95731050 | 95731150 | 1167-Lng-A-T | 70   | chr14:95731050-95731150 |
| chr14 | 95850650 | 95850750 | 1072-Lng-A-T | 135  | chr14:95850650-95850750 |
| chr14 | 95916950 | 95917050 | 901-Lng-B-T  | 35   | chr14:95916950-95917050 |
| chr14 | 96041750 | 96041850 | 901-Lng-D-T  | 608  | chr14:96041750-96041850 |
| chr14 | 96325650 | 96325750 | 901-Lng-C-T  | 58   | chr14:96325650-96325750 |
| chr14 | 96343150 | 96343250 | 1090-Lng-A-T | 59   | chr14:96343150-96343250 |
| chr14 | 96415950 | 96416050 | 846-Lng-A-T  | 63   | chr14:96415950-96416050 |
| chr14 | 96534850 | 96534950 | 901-Lng-D-T  | 97   | chr14:96534850-96534950 |
| chr14 | 96732750 | 96732850 | 1274-Lng-A-T | 62   | chr14:96732750-96732850 |
| chr14 | 96823250 | 96823350 | 1090-Lng-A-T | 474  | chr14:96823250-96823350 |
| chr14 | 96884150 | 96884250 | 1065-Lng-A-T | 38   | chr14:96884150-96884250 |
| chr14 | 96902750 | 96902850 | 1167-Lng-A-T | 65   | chr14:96902750-96902850 |
| chr14 | 96920050 | 96920150 | 901-Lng-D-T  | 82   | chr14:96920050-96920150 |
| chr14 | 96922350 | 96922450 | 846-Lng-A-T  | 72   | chr14:96922350-96922450 |
| chr14 | 96987550 | 96987650 | 1065-Lng-B-T | 63   | chr14:96987550-96987650 |
| chr14 | 97104150 | 97104250 | 901-Lng-B-T  | 87   | chr14:97104150-97104250 |
| chr14 | 97111650 | 97111750 | 1065-Lng-B-T | 73   | chr14:97111650-97111750 |
| chr14 | 97153950 | 97154050 | 1223-Lng-D-T | 47   | chr14:97153950-97154050 |
| chr14 | 97279450 | 97279550 | 1065-Lng-C-T | 1259 | chr14:97279450-97279550 |
| chr14 | 97589450 | 97589550 | 1090-Lng-B-T | 142  | chr14:97589450-97589550 |
| chr14 | 97869450 | 97869550 | 846-Lng-A-T  | 255  | chr14:97869450-97869550 |
| chr14 | 97871950 | 97872050 | 1004-Lng-A-T | 95   | chr14:97871950-97872050 |
| chr14 | 97882350 | 97882450 | 901-Lng-A-T  | 88   | chr14:97882350-97882450 |
| chr14 | 98049250 | 98049350 | 1223-Lng-A-T | 322  | chr14:98049250-98049350 |
| chr14 | 98289650 | 98289750 | 901-Lng-A-T  | 85   | chr14:98289650-98289750 |
| chr14 | 98291950 | 98292050 | 1100-Lng-A-T | 117  | chr14:98291950-98292050 |
| chr14 | 98299250 | 98299350 | 1274-Lng-A-T | 56   | chr14:98299250-98299350 |
| chr14 | 98347550 | 98347650 | 901-Lng-B-T  | 40   | chr14:98347550-98347650 |
| chr14 | 98442450 | 98442550 | 1004-Lng-A-T | 453  | chr14:98442450-98442550 |
| chr14 | 98498650 | 98498750 | 1223-Lng-A-T | 68   | chr14:98498650-98498750 |
| chr14 | 98549150 | 98549250 | 1151-Lng-A-T | 165  | chr14:98549150-98549250 |
| chr14 | 98676250 | 98676350 | 1100-Lng-A-T | 63   | chr14:98676250-98676350 |
| chr14 | 99152150 | 99152250 | 1065-Lng-A-T | 44   | chr14:99152150-99152250 |
| chr14 | 99245650 | 99245750 | 901-Lng-B-T  | 184  | chr14:99245650-99245750 |
| chr14 | 99279650 | 99279750 | 1223-Lng-A-T | 1230 | chr14:99279650-99279750 |
| chr14 | 99292050 | 99292150 | 1223-Lng-A-T | 65   | chr14:99292050-99292150 |
| chr14 | 99336950 | 99337050 | 901-Lng-A-T  | 128  | chr14:99336950-99337050 |
| chr14 | 99417550 | 99417650 | 901-Lng-A-T  | 263  | chr14:99417550-99417650 |
| chr14 | 99417950 | 99418050 | 1223-Lng-B-T | 311  | chr14:99417950-99418050 |
| chr14 | 99423950 | 99424050 | 901-Lng-A-T  | 51   | chr14:99423950-99424050 |
| chr14 | 99433550 | 99433650 | 901-Lng-A-T  | 50   | chr14:99433550-99433650 |

**Table S2: SB Insertion regions**

|       |           |           |              |      |                           |
|-------|-----------|-----------|--------------|------|---------------------------|
| chr14 | 99440950  | 99441050  | 901-Lng-B-T  | 163  | chr14:99440950-99441050   |
| chr14 | 99442250  | 99442350  | 901-Lng-A-T  | 71   | chr14:99442250-99442350   |
| chr14 | 99449350  | 99449450  | 1065-Lng-C-T | 64   | chr14:99449350-99449450   |
| chr14 | 99517650  | 99517750  | 1065-Lng-B-T | 43   | chr14:99517650-99517750   |
| chr14 | 99579050  | 99579150  | 1223-Lng-A-T | 96   | chr14:99579050-99579150   |
| chr14 | 99634150  | 99634250  | 1223-Lng-D-T | 72   | chr14:99634150-99634250   |
| chr14 | 99658150  | 99658250  | 1223-Lng-A-T | 910  | chr14:99658150-99658250   |
| chr14 | 99695550  | 99695650  | 1223-Lng-A-T | 62   | chr14:99695550-99695650   |
| chr14 | 99783150  | 99783250  | 1065-Lng-C-T | 62   | chr14:99783150-99783250   |
| chr14 | 99810950  | 99811050  | 1065-Lng-A-T | 511  | chr14:99810950-99811050   |
| chr14 | 99866050  | 99866150  | 1188-Lng-A-T | 36   | chr14:99866050-99866150   |
| chr14 | 99943450  | 99943550  | 1167-Lng-A-T | 112  | chr14:99943450-99943550   |
| chr14 | 100113850 | 100113950 | 1274-Lng-A-T | 91   | chr14:100113850-100113950 |
| chr14 | 100717250 | 100717350 | 1274-Lng-A-T | 78   | chr14:100717250-100717350 |
| chr14 | 100752050 | 100752150 | 1065-Lng-A-T | 92   | chr14:100752050-100752150 |
| chr14 | 100829050 | 100829150 | 1065-Lng-A-T | 57   | chr14:100829050-100829150 |
| chr14 | 100885150 | 100885250 | 1004-Lng-A-T | 110  | chr14:100885150-100885250 |
| chr14 | 101630950 | 101631050 | 1223-Lng-A-T | 84   | chr14:101630950-101631050 |
| chr14 | 101842750 | 101842850 | 1223-Lng-B-T | 39   | chr14:101842750-101842850 |
| chr14 | 101892650 | 101892750 | 1072-Lng-A-T | 169  | chr14:101892650-101892750 |
| chr14 | 101905550 | 101905650 | 1223-Lng-D-T | 46   | chr14:101905550-101905650 |
| chr14 | 101936550 | 101936650 | 1151-Lng-A-T | 411  | chr14:101936550-101936650 |
| chr14 | 101973750 | 101973850 | 1065-Lng-A-T | 36   | chr14:101973750-101973850 |
| chr14 | 101974550 | 101974650 | 1151-Lng-A-T | 72   | chr14:101974550-101974650 |
| chr14 | 101988550 | 101988650 | 1100-Lng-A-T | 101  | chr14:101988550-101988650 |
| chr14 | 102010950 | 102011050 | 901-Lng-D-T  | 139  | chr14:102010950-102011050 |
| chr14 | 102131150 | 102131250 | 1223-Lng-B-T | 35   | chr14:102131150-102131250 |
| chr14 | 102165450 | 102165550 | 1223-Lng-A-T | 1359 | chr14:102165450-102165550 |
| chr14 | 102226750 | 102226850 | 1274-Lng-A-T | 189  | chr14:102226750-102226850 |
| chr14 | 102233250 | 102233350 | 901-Lng-C-T  | 215  | chr14:102233250-102233350 |
| chr14 | 102257750 | 102257850 | 901-Lng-C-T  | 78   | chr14:102257750-102257850 |
| chr14 | 102261850 | 102261950 | 1065-Lng-B-T | 49   | chr14:102261850-102261950 |
| chr14 | 102274350 | 102274450 | 901-Lng-D-T  | 275  | chr14:102274350-102274450 |
| chr14 | 102308150 | 102308250 | 1100-Lng-A-T | 60   | chr14:102308150-102308250 |
| chr14 | 102496650 | 102496750 | 1065-Lng-A-T | 92   | chr14:102496650-102496750 |
| chr14 | 102701650 | 102701750 | 1223-Lng-B-T | 34   | chr14:102701650-102701750 |
| chr14 | 102757350 | 102757450 | 901-Lng-A-T  | 88   | chr14:102757350-102757450 |
| chr14 | 102883350 | 102883450 | 1152-Lng-A-T | 80   | chr14:102883350-102883450 |
| chr14 | 103130150 | 103130250 | 901-Lng-C-T  | 76   | chr14:103130150-103130250 |
| chr14 | 103390650 | 103390750 | 1065-Lng-B-T | 69   | chr14:103390650-103390750 |
| chr14 | 103460450 | 103460550 | 1065-Lng-B-T | 53   | chr14:103460450-103460550 |
| chr14 | 103471050 | 103471150 | 1223-Lng-C-T | 47   | chr14:103471050-103471150 |
| chr14 | 103490750 | 103490850 | 1223-Lng-C-T | 43   | chr14:103490750-103490850 |
| chr14 | 103502050 | 103502150 | 1223-Lng-B-T | 34   | chr14:103502050-103502150 |
| chr14 | 103548050 | 103548150 | 1065-Lng-B-T | 55   | chr14:103548050-103548150 |
| chr14 | 103612850 | 103612950 | 1223-Lng-C-T | 53   | chr14:103612850-103612950 |

**Table S2: SB Insertion regions**

|       |           |           |              |      |                           |
|-------|-----------|-----------|--------------|------|---------------------------|
| chr14 | 103619350 | 103619450 | 1223-Lng-A-T | 517  | chr14:103619350-103619450 |
| chr14 | 103647750 | 103647850 | 901-Lng-A-T  | 95   | chr14:103647750-103647850 |
| chr14 | 103688550 | 103688650 | 901-Lng-A-T  | 107  | chr14:103688550-103688650 |
| chr14 | 103702550 | 103702650 | 901-Lng-C-T  | 60   | chr14:103702550-103702650 |
| chr14 | 103722350 | 103722450 | 1065-Lng-B-T | 45   | chr14:103722350-103722450 |
| chr14 | 103988550 | 103988650 | 901-Lng-C-T  | 30   | chr14:103988550-103988650 |
| chr14 | 104078750 | 104078850 | 1090-Lng-A-T | 68   | chr14:104078750-104078850 |
| chr14 | 104100150 | 104100250 | 1223-Lng-B-T | 34   | chr14:104100150-104100250 |
| chr14 | 104101850 | 104101950 | 1065-Lng-A-T | 79   | chr14:104101850-104101950 |
| chr14 | 104461650 | 104461750 | 1223-Lng-B-T | 34   | chr14:104461650-104461750 |
| chr14 | 104495450 | 104495550 | 1223-Lng-D-T | 51   | chr14:104495450-104495550 |
| chr14 | 104555950 | 104556050 | 1223-Lng-D-T | 43   | chr14:104555950-104556050 |
| chr14 | 104579250 | 104579350 | 901-Lng-D-T  | 633  | chr14:104579250-104579350 |
| chr14 | 104663950 | 104664050 | 1065-Lng-A-T | 476  | chr14:104663950-104664050 |
| chr14 | 104697050 | 104697150 | 1223-Lng-D-T | 40   | chr14:104697050-104697150 |
| chr14 | 104883850 | 104883950 | 1151-Lng-A-T | 95   | chr14:104883850-104883950 |
| chr14 | 105028650 | 105028750 | 901-Lng-B-T  | 47   | chr14:105028650-105028750 |
| chr14 | 105313550 | 105313650 | 1090-Lng-A-T | 106  | chr14:105313550-105313650 |
| chr14 | 105483150 | 105483250 | 1223-Lng-A-T | 251  | chr14:105483150-105483250 |
| chr14 | 105551050 | 105551150 | 1223-Lng-B-T | 47   | chr14:105551050-105551150 |
| chr14 | 105559250 | 105559350 | 1100-Lng-A-T | 64   | chr14:105559250-105559350 |
| chr14 | 105680650 | 105680750 | 1223-Lng-B-T | 138  | chr14:105680650-105680750 |
| chr14 | 105691850 | 105691950 | 1188-Lng-A-T | 40   | chr14:105691850-105691950 |
| chr14 | 105967550 | 105967650 | 1223-Lng-A-T | 184  | chr14:105967550-105967650 |
| chr14 | 106025850 | 106025950 | 1065-Lng-A-T | 85   | chr14:106025850-106025950 |
| chr14 | 106156450 | 106156550 | 1090-Lng-A-T | 354  | chr14:106156450-106156550 |
| chr14 | 106206650 | 106206750 | 1167-Lng-A-T | 98   | chr14:106206650-106206750 |
| chr14 | 106768250 | 106768350 | 1223-Lng-A-T | 107  | chr14:106768250-106768350 |
| chr14 | 106770250 | 106770350 | 901-Lng-C-T  | 39   | chr14:106770250-106770350 |
| chr14 | 106922050 | 106922150 | 1090-Lng-A-T | 52   | chr14:106922050-106922150 |
| chr14 | 107195050 | 107195150 | 901-Lng-D-T  | 410  | chr14:107195050-107195150 |
| chr14 | 107210950 | 107211050 | 1072-Lng-A-T | 71   | chr14:107210950-107211050 |
| chr14 | 107293450 | 107293550 | 1090-Lng-A-T | 131  | chr14:107293450-107293550 |
| chr14 | 107305450 | 107305550 | 1223-Lng-B-T | 42   | chr14:107305450-107305550 |
| chr14 | 107414450 | 107414550 | 846-Lng-A-T  | 65   | chr14:107414450-107414550 |
| chr14 | 107439550 | 107439650 | 901-Lng-D-T  | 178  | chr14:107439550-107439650 |
| chr14 | 107600150 | 107600250 | 1223-Lng-A-T | 2160 | chr14:107600150-107600250 |
| chr14 | 107973550 | 107973650 | 1223-Lng-A-T | 102  | chr14:107973550-107973650 |
| chr14 | 108071150 | 108071250 | 1223-Lng-A-T | 124  | chr14:108071150-108071250 |
| chr14 | 108114250 | 108114350 | 1152-Lng-A-T | 470  | chr14:108114250-108114350 |
| chr14 | 108229450 | 108229550 | 1223-Lng-A-T | 89   | chr14:108229450-108229550 |
| chr14 | 108238550 | 108238650 | 1274-Lng-A-T | 153  | chr14:108238550-108238650 |
| chr14 | 108366850 | 108366950 | 1223-Lng-A-T | 223  | chr14:108366850-108366950 |
| chr14 | 108378850 | 108378950 | 1065-Lng-B-T | 51   | chr14:108378850-108378950 |
| chr14 | 108401550 | 108401650 | 1065-Lng-C-T | 94   | chr14:108401550-108401650 |
| chr14 | 108438350 | 108438450 | 1223-Lng-A-T | 119  | chr14:108438350-108438450 |

**Table S2: SB Insertion regions**

|       |           |           |              |      |                           |
|-------|-----------|-----------|--------------|------|---------------------------|
| chr14 | 108507550 | 108507650 | 1004-Lng-A-T | 58   | chr14:108507550-108507650 |
| chr14 | 108533750 | 108533850 | 1274-Lng-A-T | 109  | chr14:108533750-108533850 |
| chr14 | 108655550 | 108655650 | 1004-Lng-A-T | 70   | chr14:108655550-108655650 |
| chr14 | 108749250 | 108749350 | 1223-Lng-A-T | 66   | chr14:108749250-108749350 |
| chr14 | 109210050 | 109210150 | 901-Lng-C-T  | 196  | chr14:109210050-109210150 |
| chr14 | 109244750 | 109244850 | 901-Lng-D-T  | 181  | chr14:109244750-109244850 |
| chr14 | 109327950 | 109328050 | 901-Lng-C-T  | 68   | chr14:109327950-109328050 |
| chr14 | 109349550 | 109349650 | 901-Lng-C-T  | 97   | chr14:109349550-109349650 |
| chr14 | 109446150 | 109446250 | 901-Lng-D-T  | 199  | chr14:109446150-109446250 |
| chr14 | 109541650 | 109541750 | 1065-Lng-A-T | 80   | chr14:109541650-109541750 |
| chr14 | 109549150 | 109549250 | 1151-Lng-A-T | 66   | chr14:109549150-109549250 |
| chr14 | 109980150 | 109980250 | 1167-Lng-A-T | 73   | chr14:109980150-109980250 |
| chr14 | 110041050 | 110041150 | 1223-Lng-B-T | 48   | chr14:110041050-110041150 |
| chr14 | 110056650 | 110056750 | 1065-Lng-A-T | 37   | chr14:110056650-110056750 |
| chr14 | 110106750 | 110106850 | 1223-Lng-A-T | 1272 | chr14:110106750-110106850 |
| chr14 | 110290650 | 110290750 | 1223-Lng-A-T | 110  | chr14:110290650-110290750 |
| chr14 | 110447750 | 110447850 | 1274-Lng-A-T | 67   | chr14:110447750-110447850 |
| chr14 | 110494050 | 110494150 | 1188-Lng-A-T | 49   | chr14:110494050-110494150 |
| chr14 | 110569450 | 110569550 | 901-Lng-A-T  | 72   | chr14:110569450-110569550 |
| chr14 | 110862450 | 110862550 | 901-Lng-A-T  | 62   | chr14:110862450-110862550 |
| chr14 | 111413050 | 111413150 | 1223-Lng-D-T | 53   | chr14:111413050-111413150 |
| chr14 | 111494050 | 111494150 | 1100-Lng-A-T | 135  | chr14:111494050-111494150 |
| chr14 | 111790650 | 111790750 | 1151-Lng-A-T | 63   | chr14:111790650-111790750 |
| chr14 | 111836650 | 111836750 | 901-Lng-C-T  | 174  | chr14:111836650-111836750 |
| chr14 | 111997650 | 111997750 | 1223-Lng-A-T | 51   | chr14:111997650-111997750 |
| chr14 | 112664450 | 112664550 | 1100-Lng-B-T | 79   | chr14:112664450-112664550 |
| chr14 | 112667850 | 112667950 | 1004-Lng-A-T | 318  | chr14:112667850-112667950 |
| chr14 | 112834550 | 112834650 | 1065-Lng-C-T | 73   | chr14:112834550-112834650 |
| chr14 | 112884550 | 112884650 | 901-Lng-B-T  | 495  | chr14:112884550-112884650 |
| chr14 | 112931950 | 112932050 | 1065-Lng-A-T | 52   | chr14:112931950-112932050 |
| chr14 | 112971350 | 112971450 | 1223-Lng-A-T | 246  | chr14:112971350-112971450 |
| chr14 | 113012350 | 113012450 | 901-Lng-B-T  | 293  | chr14:113012350-113012450 |
| chr14 | 113346350 | 113346450 | 1065-Lng-B-T | 57   | chr14:113346350-113346450 |
| chr14 | 113368150 | 113368250 | 1188-Lng-A-T | 230  | chr14:113368150-113368250 |
| chr14 | 113448350 | 113448450 | 901-Lng-C-T  | 163  | chr14:113448350-113448450 |
| chr14 | 113597850 | 113597950 | 1152-Lng-A-T | 62   | chr14:113597850-113597950 |
| chr14 | 113665850 | 113665950 | 1274-Lng-A-T | 54   | chr14:113665850-113665950 |
| chr14 | 113731550 | 113731650 | 1152-Lng-A-T | 59   | chr14:113731550-113731650 |
| chr14 | 113834350 | 113834450 | 901-Lng-A-T  | 67   | chr14:113834350-113834450 |
| chr14 | 113886450 | 113886550 | 1004-Lng-A-T | 114  | chr14:113886450-113886550 |
| chr14 | 113925950 | 113926050 | 1090-Lng-A-T | 47   | chr14:113925950-113926050 |
| chr14 | 113975450 | 113975550 | 1223-Lng-A-T | 2593 | chr14:113975450-113975550 |
| chr14 | 114085050 | 114085150 | 846-Lng-A-T  | 714  | chr14:114085050-114085150 |
| chr14 | 114138050 | 114138150 | 1223-Lng-A-T | 963  | chr14:114138050-114138150 |
| chr14 | 114700750 | 114700850 | 1065-Lng-C-T | 81   | chr14:114700750-114700850 |
| chr14 | 114784350 | 114784450 | 1065-Lng-A-T | 126  | chr14:114784350-114784450 |

**Table S2: SB Insertion regions**

|       |           |           |              |     |                           |
|-------|-----------|-----------|--------------|-----|---------------------------|
| chr14 | 115147550 | 115147650 | 1065-Lng-B-T | 54  | chr14:115147550-115147650 |
| chr14 | 115187450 | 115187550 | 1004-Lng-A-T | 94  | chr14:115187450-115187550 |
| chr14 | 115225350 | 115225450 | 1223-Lng-A-T | 61  | chr14:115225350-115225450 |
| chr14 | 115622250 | 115622350 | 1065-Lng-B-T | 40  | chr14:115622250-115622350 |
| chr14 | 115655050 | 115655150 | 1151-Lng-A-T | 55  | chr14:115655050-115655150 |
| chr14 | 115937650 | 115937750 | 1223-Lng-B-T | 275 | chr14:115937650-115937750 |
| chr14 | 115967450 | 115967550 | 1065-Lng-B-T | 65  | chr14:115967450-115967550 |
| chr14 | 116429350 | 116429450 | 1274-Lng-A-T | 212 | chr14:116429350-116429450 |
| chr14 | 116495050 | 116495150 | 1090-Lng-A-T | 55  | chr14:116495050-116495150 |
| chr14 | 116593350 | 116593450 | 1065-Lng-C-T | 64  | chr14:116593350-116593450 |
| chr14 | 116617750 | 116617850 | 1065-Lng-C-T | 74  | chr14:116617750-116617850 |
| chr14 | 116689350 | 116689450 | 1072-Lng-A-T | 79  | chr14:116689350-116689450 |
| chr14 | 116958750 | 116958850 | 1188-Lng-A-T | 36  | chr14:116958750-116958850 |
| chr14 | 117012250 | 117012350 | 1090-Lng-A-T | 78  | chr14:117012250-117012350 |
| chr14 | 117120450 | 117120550 | 901-Lng-D-T  | 95  | chr14:117120450-117120550 |
| chr14 | 117283350 | 117283450 | 1065-Lng-C-T | 94  | chr14:117283350-117283450 |
| chr14 | 117487050 | 117487150 | 1188-Lng-A-T | 34  | chr14:117487050-117487150 |
| chr14 | 117585350 | 117585450 | 1223-Lng-A-T | 190 | chr14:117585350-117585450 |
| chr14 | 117802450 | 117802550 | 1223-Lng-B-T | 60  | chr14:117802450-117802550 |
| chr14 | 118088350 | 118088450 | 1223-Lng-D-T | 41  | chr14:118088350-118088450 |
| chr14 | 118238850 | 118238950 | 901-Lng-A-T  | 91  | chr14:118238850-118238950 |
| chr14 | 118284550 | 118284650 | 1274-Lng-A-T | 172 | chr14:118284550-118284650 |
| chr14 | 118518750 | 118518850 | 1072-Lng-A-T | 76  | chr14:118518750-118518850 |
| chr14 | 118551850 | 118551950 | 1274-Lng-A-T | 108 | chr14:118551850-118551950 |
| chr14 | 118923750 | 118923850 | 1090-Lng-A-T | 106 | chr14:118923750-118923850 |
| chr14 | 118958850 | 118958950 | 1188-Lng-A-T | 132 | chr14:118958850-118958950 |
| chr14 | 118973850 | 118973950 | 846-Lng-A-T  | 51  | chr14:118973850-118973950 |
| chr14 | 118979050 | 118979150 | 1004-Lng-A-T | 192 | chr14:118979050-118979150 |
| chr14 | 119048550 | 119048650 | 1223-Lng-D-T | 45  | chr14:119048550-119048650 |
| chr14 | 119249750 | 119249850 | 1100-Lng-A-T | 71  | chr14:119249750-119249850 |
| chr14 | 119339150 | 119339250 | 1004-Lng-A-T | 62  | chr14:119339150-119339250 |
| chr14 | 119376650 | 119376750 | 1090-Lng-A-T | 85  | chr14:119376650-119376750 |
| chr14 | 119751550 | 119751650 | 1223-Lng-C-T | 44  | chr14:119751550-119751650 |
| chr14 | 119755550 | 119755650 | 901-Lng-B-T  | 41  | chr14:119755550-119755650 |
| chr14 | 119770050 | 119770150 | 1065-Lng-B-T | 259 | chr14:119770050-119770150 |
| chr14 | 119917950 | 119918050 | 901-Lng-C-T  | 44  | chr14:119917950-119918050 |
| chr14 | 119984150 | 119984250 | 901-Lng-B-T  | 73  | chr14:119984150-119984250 |
| chr14 | 120076550 | 120076650 | 846-Lng-A-T  | 76  | chr14:120076550-120076650 |
| chr14 | 120700350 | 120700450 | 1223-Lng-D-T | 47  | chr14:120700350-120700450 |
| chr14 | 120764650 | 120764750 | 901-Lng-C-T  | 59  | chr14:120764650-120764750 |
| chr14 | 120785050 | 120785150 | 1167-Lng-A-T | 59  | chr14:120785050-120785150 |
| chr14 | 120938950 | 120939050 | 846-Lng-A-T  | 118 | chr14:120938950-120939050 |
| chr14 | 121003250 | 121003350 | 1065-Lng-A-T | 344 | chr14:121003250-121003350 |
| chr14 | 121267150 | 121267250 | 1274-Lng-A-T | 126 | chr14:121267150-121267250 |
| chr14 | 121446450 | 121446550 | 901-Lng-A-T  | 425 | chr14:121446450-121446550 |
| chr14 | 121454650 | 121454750 | 1167-Lng-A-T | 85  | chr14:121454650-121454750 |

**Table S2: SB Insertion regions**

|       |           |           |              |      |                           |
|-------|-----------|-----------|--------------|------|---------------------------|
| chr14 | 121456650 | 121456750 | 1090-Lng-A-T | 44   | chr14:121456650-121456750 |
| chr14 | 121520450 | 121520550 | 901-Lng-B-T  | 112  | chr14:121520450-121520550 |
| chr14 | 121581450 | 121581550 | 1152-Lng-A-T | 117  | chr14:121581450-121581550 |
| chr14 | 121596750 | 121596850 | 1065-Lng-A-T | 97   | chr14:121596750-121596850 |
| chr14 | 121705150 | 121705250 | 1223-Lng-B-T | 35   | chr14:121705150-121705250 |
| chr14 | 121752150 | 121752250 | 1274-Lng-A-T | 156  | chr14:121752150-121752250 |
| chr14 | 121768750 | 121768850 | 1274-Lng-A-T | 166  | chr14:121768750-121768850 |
| chr14 | 121883350 | 121883450 | 1223-Lng-B-T | 69   | chr14:121883350-121883450 |
| chr14 | 122004050 | 122004150 | 1152-Lng-A-T | 280  | chr14:122004050-122004150 |
| chr14 | 122017050 | 122017150 | 1065-Lng-B-T | 57   | chr14:122017050-122017150 |
| chr14 | 122103650 | 122103750 | 1223-Lng-B-T | 49   | chr14:122103650-122103750 |
| chr14 | 122108450 | 122108550 | 1100-Lng-A-T | 77   | chr14:122108450-122108550 |
| chr14 | 122162350 | 122162450 | 1274-Lng-A-T | 70   | chr14:122162350-122162450 |
| chr14 | 122180350 | 122180450 | 1004-Lng-A-T | 99   | chr14:122180350-122180450 |
| chr14 | 122296150 | 122296250 | 1151-Lng-A-T | 54   | chr14:122296150-122296250 |
| chr14 | 122296250 | 122296350 | 1274-Lng-A-T | 51   | chr14:122296250-122296350 |
| chr14 | 122344750 | 122344850 | 1065-Lng-B-T | 455  | chr14:122344750-122344850 |
| chr14 | 122368350 | 122368450 | 1152-Lng-A-T | 59   | chr14:122368350-122368450 |
| chr14 | 122383050 | 122383150 | 901-Lng-C-T  | 79   | chr14:122383050-122383150 |
| chr14 | 122535750 | 122535850 | 1004-Lng-A-T | 68   | chr14:122535750-122535850 |
| chr14 | 122535950 | 122536050 | 1223-Lng-A-T | 78   | chr14:122535950-122536050 |
| chr14 | 122539050 | 122539150 | 1223-Lng-B-T | 92   | chr14:122539050-122539150 |
| chr14 | 122966250 | 122966350 | 1274-Lng-A-T | 57   | chr14:122966250-122966350 |
| chr14 | 123046650 | 123046750 | 1090-Lng-A-T | 109  | chr14:123046650-123046750 |
| chr14 | 123048250 | 123048350 | 1065-Lng-B-T | 42   | chr14:123048250-123048350 |
| chr14 | 123048750 | 123048850 | 1223-Lng-C-T | 46   | chr14:123048750-123048850 |
| chr14 | 123049050 | 123049150 | 1090-Lng-A-T | 130  | chr14:123049050-123049150 |
| chr14 | 123102450 | 123102550 | 901-Lng-C-T  | 203  | chr14:123102450-123102550 |
| chr14 | 123223950 | 123224050 | 1152-Lng-A-T | 68   | chr14:123223950-123224050 |
| chr14 | 123239250 | 123239350 | 901-Lng-A-T  | 346  | chr14:123239250-123239350 |
| chr14 | 123299150 | 123299250 | 1065-Lng-C-T | 2184 | chr14:123299150-123299250 |
| chr14 | 123341950 | 123342050 | 901-Lng-B-T  | 175  | chr14:123341950-123342050 |
| chr14 | 123404250 | 123404350 | 901-Lng-A-T  | 77   | chr14:123404250-123404350 |
| chr14 | 123801750 | 123801850 | 901-Lng-A-T  | 212  | chr14:123801750-123801850 |
| chr14 | 123860250 | 123860350 | 1065-Lng-B-T | 43   | chr14:123860250-123860350 |
| chr14 | 124084350 | 124084450 | 1090-Lng-A-T | 172  | chr14:124084350-124084450 |
| chr14 | 124114650 | 124114750 | 901-Lng-A-T  | 80   | chr14:124114650-124114750 |
| chr14 | 124163250 | 124163350 | 846-Lng-A-T  | 141  | chr14:124163250-124163350 |
| chr14 | 124378150 | 124378250 | 1152-Lng-A-T | 42   | chr14:124378150-124378250 |
| chr14 | 124391250 | 124391350 | 1065-Lng-B-T | 111  | chr14:124391250-124391350 |
| chr14 | 124491150 | 124491250 | 1090-Lng-B-T | 1472 | chr14:124491150-124491250 |
| chr14 | 124867450 | 124867550 | 1065-Lng-A-T | 803  | chr14:124867450-124867550 |
| chr14 | 125132750 | 125132850 | 1065-Lng-B-T | 89   | chr14:125132750-125132850 |
| chr15 | 3015350   | 3015450   | 1223-Lng-A-T | 540  | chr15:3015350-3015450     |
| chr15 | 3154650   | 3154750   | 901-Lng-A-T  | 635  | chr15:3154650-3154750     |
| chr15 | 3183050   | 3183150   | 1072-Lng-A-T | 133  | chr15:3183050-3183150     |



**Table S2: SB Insertion regions**

|       |         |         |              |     |                       |
|-------|---------|---------|--------------|-----|-----------------------|
| chr15 | 3192950 | 3193050 | 901-Lng-D-T  | 138 | chr15:3192950-3193050 |
| chr15 | 3209750 | 3209850 | 1072-Lng-A-T | 59  | chr15:3209750-3209850 |
| chr15 | 3216050 | 3216150 | 901-Lng-A-T  | 67  | chr15:3216050-3216150 |
| chr15 | 3221950 | 3222050 | 1072-Lng-A-T | 254 | chr15:3221950-3222050 |
| chr15 | 3223750 | 3223850 | 1065-Lng-A-T | 59  | chr15:3223750-3223850 |
| chr15 | 3226650 | 3226750 | 1065-Lng-B-T | 62  | chr15:3226650-3226750 |
| chr15 | 3231150 | 3231250 | 1167-Lng-A-T | 99  | chr15:3231150-3231250 |
| chr15 | 3236750 | 3236850 | 1090-Lng-A-T | 61  | chr15:3236750-3236850 |
| chr15 | 3238850 | 3238950 | 1065-Lng-A-T | 315 | chr15:3238850-3238950 |
| chr15 | 3256750 | 3256850 | 1090-Lng-A-T | 59  | chr15:3256750-3256850 |
| chr15 | 3308550 | 3308650 | 1223-Lng-D-T | 58  | chr15:3308550-3308650 |
| chr15 | 3334350 | 3334450 | 901-Lng-B-T  | 218 | chr15:3334350-3334450 |
| chr15 | 3356750 | 3356850 | 1065-Lng-B-T | 458 | chr15:3356750-3356850 |
| chr15 | 3368050 | 3368150 | 901-Lng-C-T  | 76  | chr15:3368050-3368150 |
| chr15 | 3376550 | 3376650 | 901-Lng-D-T  | 369 | chr15:3376550-3376650 |
| chr15 | 3397750 | 3397850 | 901-Lng-D-T  | 148 | chr15:3397750-3397850 |
| chr15 | 3444250 | 3444350 | 1090-Lng-B-T | 697 | chr15:3444250-3444350 |
| chr15 | 3460950 | 3461050 | 1151-Lng-A-T | 55  | chr15:3460950-3461050 |
| chr15 | 3513950 | 3514050 | 1004-Lng-A-T | 74  | chr15:3513950-3514050 |
| chr15 | 3516550 | 3516650 | 901-Lng-C-T  | 69  | chr15:3516550-3516650 |
| chr15 | 3533550 | 3533650 | 901-Lng-A-T  | 442 | chr15:3533550-3533650 |
| chr15 | 3545750 | 3545850 | 901-Lng-C-T  | 39  | chr15:3545750-3545850 |
| chr15 | 3560850 | 3560950 | 901-Lng-A-T  | 120 | chr15:3560850-3560950 |
| chr15 | 3563650 | 3563750 | 901-Lng-D-T  | 195 | chr15:3563650-3563750 |
| chr15 | 3571550 | 3571650 | 1065-Lng-C-T | 80  | chr15:3571550-3571650 |
| chr15 | 3574750 | 3574850 | 901-Lng-B-T  | 253 | chr15:3574750-3574850 |
| chr15 | 3650350 | 3650450 | 1004-Lng-A-T | 260 | chr15:3650350-3650450 |
| chr15 | 3655350 | 3655450 | 1223-Lng-B-T | 229 | chr15:3655350-3655450 |
| chr15 | 3701150 | 3701250 | 901-Lng-D-T  | 291 | chr15:3701150-3701250 |
| chr15 | 3750250 | 3750350 | 1072-Lng-A-T | 75  | chr15:3750250-3750350 |
| chr15 | 3752050 | 3752150 | 901-Lng-B-T  | 40  | chr15:3752050-3752150 |
| chr15 | 3753950 | 3754050 | 1090-Lng-B-T | 788 | chr15:3753950-3754050 |
| chr15 | 3843850 | 3843950 | 1090-Lng-A-T | 105 | chr15:3843850-3843950 |
| chr15 | 3853250 | 3853350 | 1065-Lng-B-T | 391 | chr15:3853250-3853350 |
| chr15 | 3856150 | 3856250 | 1065-Lng-B-T | 53  | chr15:3856150-3856250 |
| chr15 | 3858550 | 3858650 | 1065-Lng-A-T | 55  | chr15:3858550-3858650 |
| chr15 | 3859750 | 3859850 | 1274-Lng-A-T | 55  | chr15:3859750-3859850 |
| chr15 | 3930150 | 3930250 | 846-Lng-A-T  | 98  | chr15:3930150-3930250 |
| chr15 | 3932050 | 3932150 | 1090-Lng-A-T | 81  | chr15:3932050-3932150 |
| chr15 | 3933350 | 3933450 | 1065-Lng-B-T | 84  | chr15:3933350-3933450 |
| chr15 | 3937050 | 3937150 | 901-Lng-D-T  | 287 | chr15:3937050-3937150 |
| chr15 | 3944250 | 3944350 | 901-Lng-A-T  | 228 | chr15:3944250-3944350 |
| chr15 | 3966150 | 3966250 | 901-Lng-C-T  | 119 | chr15:3966150-3966250 |
| chr15 | 3973950 | 3974050 | 1065-Lng-B-T | 46  | chr15:3973950-3974050 |
| chr15 | 3991150 | 3991250 | 1188-Lng-A-T | 169 | chr15:3991150-3991250 |
| chr15 | 3995050 | 3995150 | 901-Lng-A-T  | 138 | chr15:3995050-3995150 |

**Table S2: SB Insertion regions**

|       |         |         |              |       |                       |
|-------|---------|---------|--------------|-------|-----------------------|
| chr15 | 3995350 | 3995450 | 1072-Lng-A-T | 14582 | chr15:3995350-3995450 |
| chr15 | 3997850 | 3997950 | 1065-Lng-A-T | 59    | chr15:3997850-3997950 |
| chr15 | 3998050 | 3998150 | 901-Lng-B-T  | 229   | chr15:3998050-3998150 |
| chr15 | 4000750 | 4000850 | 1090-Lng-B-T | 208   | chr15:4000750-4000850 |
| chr15 | 4004150 | 4004250 | 901-Lng-D-T  | 261   | chr15:4004150-4004250 |
| chr15 | 4024250 | 4024350 | 1223-Lng-B-T | 211   | chr15:4024250-4024350 |
| chr15 | 4033050 | 4033150 | 1065-Lng-A-T | 48    | chr15:4033050-4033150 |
| chr15 | 4034750 | 4034850 | 901-Lng-C-T  | 51    | chr15:4034750-4034850 |
| chr15 | 4039650 | 4039750 | 1090-Lng-A-T | 66    | chr15:4039650-4039750 |
| chr15 | 4076150 | 4076250 | 901-Lng-A-T  | 105   | chr15:4076150-4076250 |
| chr15 | 4076450 | 4076550 | 1004-Lng-A-T | 67    | chr15:4076450-4076550 |
| chr15 | 4090950 | 4091050 | 1065-Lng-A-T | 51    | chr15:4090950-4091050 |
| chr15 | 4091450 | 4091550 | 1167-Lng-A-T | 75    | chr15:4091450-4091550 |
| chr15 | 4100650 | 4100750 | 1065-Lng-A-T | 75    | chr15:4100650-4100750 |
| chr15 | 4259950 | 4260050 | 901-Lng-A-T  | 60    | chr15:4259950-4260050 |
| chr15 | 4288050 | 4288150 | 1065-Lng-A-T | 57    | chr15:4288050-4288150 |
| chr15 | 4299350 | 4299450 | 1151-Lng-A-T | 54    | chr15:4299350-4299450 |
| chr15 | 4305850 | 4305950 | 901-Lng-A-T  | 550   | chr15:4305850-4305950 |
| chr15 | 4308350 | 4308450 | 1274-Lng-A-T | 73    | chr15:4308350-4308450 |
| chr15 | 4377850 | 4377950 | 1223-Lng-D-T | 44    | chr15:4377850-4377950 |
| chr15 | 4381750 | 4381850 | 1065-Lng-C-T | 66    | chr15:4381750-4381850 |
| chr15 | 4425750 | 4425850 | 1065-Lng-C-T | 87    | chr15:4425750-4425850 |
| chr15 | 4454850 | 4454950 | 1065-Lng-A-T | 87    | chr15:4454850-4454950 |
| chr15 | 4492250 | 4492350 | 901-Lng-C-T  | 54    | chr15:4492250-4492350 |
| chr15 | 4508850 | 4508950 | 1167-Lng-A-T | 46    | chr15:4508850-4508950 |
| chr15 | 4521350 | 4521450 | 1072-Lng-A-T | 5567  | chr15:4521350-4521450 |
| chr15 | 4666950 | 4667050 | 1065-Lng-B-T | 52    | chr15:4666950-4667050 |
| chr15 | 4708050 | 4708150 | 1090-Lng-B-T | 127   | chr15:4708050-4708150 |
| chr15 | 4712550 | 4712650 | 901-Lng-A-T  | 141   | chr15:4712550-4712650 |
| chr15 | 4712550 | 4712650 | 901-Lng-B-T  | 269   | chr15:4712550-4712650 |
| chr15 | 4737150 | 4737250 | 901-Lng-D-T  | 375   | chr15:4737150-4737250 |
| chr15 | 4863550 | 4863650 | 846-Lng-A-T  | 43    | chr15:4863550-4863650 |
| chr15 | 4904050 | 4904150 | 1090-Lng-B-T | 320   | chr15:4904050-4904150 |
| chr15 | 4942350 | 4942450 | 846-Lng-A-T  | 102   | chr15:4942350-4942450 |
| chr15 | 4996850 | 4996950 | 846-Lng-A-T  | 118   | chr15:4996850-4996950 |
| chr15 | 5023650 | 5023750 | 901-Lng-C-T  | 196   | chr15:5023650-5023750 |
| chr15 | 5061550 | 5061650 | 1065-Lng-A-T | 42    | chr15:5061550-5061650 |
| chr15 | 5089250 | 5089350 | 1065-Lng-B-T | 124   | chr15:5089250-5089350 |
| chr15 | 5092150 | 5092250 | 1065-Lng-A-T | 73    | chr15:5092150-5092250 |
| chr15 | 5100250 | 5100350 | 1090-Lng-A-T | 57    | chr15:5100250-5100350 |
| chr15 | 5106750 | 5106850 | 1223-Lng-C-T | 57    | chr15:5106750-5106850 |
| chr15 | 5116350 | 5116450 | 1188-Lng-A-T | 59    | chr15:5116350-5116450 |
| chr15 | 5123950 | 5124050 | 1090-Lng-A-T | 102   | chr15:5123950-5124050 |
| chr15 | 5139350 | 5139450 | 1151-Lng-A-T | 91    | chr15:5139350-5139450 |
| chr15 | 5142950 | 5143050 | 901-Lng-C-T  | 37    | chr15:5142950-5143050 |
| chr15 | 5149450 | 5149550 | 1100-Lng-A-T | 55    | chr15:5149450-5149550 |

**Table S2: SB Insertion regions**

|       |         |         |              |     |                       |
|-------|---------|---------|--------------|-----|-----------------------|
| chr15 | 5161350 | 5161450 | 1223-Lng-C-T | 89  | chr15:5161350-5161450 |
| chr15 | 5161650 | 5161750 | 1004-Lng-A-T | 183 | chr15:5161650-5161750 |
| chr15 | 5162450 | 5162550 | 846-Lng-A-T  | 125 | chr15:5162450-5162550 |
| chr15 | 5200450 | 5200550 | 1188-Lng-A-T | 39  | chr15:5200450-5200550 |
| chr15 | 5201650 | 5201750 | 1167-Lng-A-T | 142 | chr15:5201650-5201750 |
| chr15 | 5203150 | 5203250 | 1090-Lng-A-T | 85  | chr15:5203150-5203250 |
| chr15 | 5248150 | 5248250 | 901-Lng-B-T  | 143 | chr15:5248150-5248250 |
| chr15 | 5336650 | 5336750 | 1004-Lng-A-T | 60  | chr15:5336650-5336750 |
| chr15 | 5338150 | 5338250 | 1065-Lng-A-T | 65  | chr15:5338150-5338250 |
| chr15 | 5424150 | 5424250 | 1072-Lng-A-T | 88  | chr15:5424150-5424250 |
| chr15 | 5452350 | 5452450 | 1072-Lng-A-T | 50  | chr15:5452350-5452450 |
| chr15 | 5464350 | 5464450 | 1004-Lng-A-T | 73  | chr15:5464350-5464450 |
| chr15 | 5510750 | 5510850 | 901-Lng-C-T  | 235 | chr15:5510750-5510850 |
| chr15 | 5596550 | 5596650 | 901-Lng-A-T  | 231 | chr15:5596550-5596650 |
| chr15 | 5690350 | 5690450 | 1223-Lng-A-T | 214 | chr15:5690350-5690450 |
| chr15 | 5703450 | 5703550 | 1065-Lng-A-T | 67  | chr15:5703450-5703550 |
| chr15 | 5900250 | 5900350 | 901-Lng-C-T  | 44  | chr15:5900250-5900350 |
| chr15 | 5922150 | 5922250 | 1090-Lng-A-T | 46  | chr15:5922150-5922250 |
| chr15 | 5982150 | 5982250 | 846-Lng-A-T  | 77  | chr15:5982150-5982250 |
| chr15 | 6077550 | 6077650 | 1004-Lng-A-T | 95  | chr15:6077550-6077650 |
| chr15 | 6108050 | 6108150 | 901-Lng-A-T  | 730 | chr15:6108050-6108150 |
| chr15 | 6110750 | 6110850 | 1072-Lng-A-T | 71  | chr15:6110750-6110850 |
| chr15 | 6122850 | 6122950 | 1223-Lng-B-T | 57  | chr15:6122850-6122950 |
| chr15 | 6182350 | 6182450 | 1065-Lng-B-T | 48  | chr15:6182350-6182450 |
| chr15 | 6197650 | 6197750 | 1167-Lng-A-T | 188 | chr15:6197650-6197750 |
| chr15 | 6208150 | 6208250 | 1072-Lng-A-T | 56  | chr15:6208150-6208250 |
| chr15 | 6276050 | 6276150 | 901-Lng-A-T  | 107 | chr15:6276050-6276150 |
| chr15 | 6353050 | 6353150 | 1167-Lng-A-T | 826 | chr15:6353050-6353150 |
| chr15 | 6422250 | 6422350 | 846-Lng-A-T  | 123 | chr15:6422250-6422350 |
| chr15 | 6427550 | 6427650 | 1223-Lng-A-T | 173 | chr15:6427550-6427650 |
| chr15 | 6550350 | 6550450 | 901-Lng-A-T  | 102 | chr15:6550350-6550450 |
| chr15 | 6551050 | 6551150 | 901-Lng-A-T  | 354 | chr15:6551050-6551150 |
| chr15 | 6552350 | 6552450 | 1223-Lng-B-T | 356 | chr15:6552350-6552450 |
| chr15 | 6563350 | 6563450 | 901-Lng-D-T  | 184 | chr15:6563350-6563450 |
| chr15 | 6659450 | 6659550 | 1065-Lng-B-T | 59  | chr15:6659450-6659550 |
| chr15 | 6663650 | 6663750 | 1223-Lng-A-T | 133 | chr15:6663650-6663750 |
| chr15 | 6666550 | 6666650 | 901-Lng-D-T  | 163 | chr15:6666550-6666650 |
| chr15 | 6668550 | 6668650 | 1065-Lng-B-T | 45  | chr15:6668550-6668650 |
| chr15 | 6674650 | 6674750 | 1152-Lng-A-T | 42  | chr15:6674650-6674750 |
| chr15 | 6676150 | 6676250 | 1065-Lng-A-T | 67  | chr15:6676150-6676250 |
| chr15 | 6676450 | 6676550 | 1065-Lng-A-T | 88  | chr15:6676450-6676550 |
| chr15 | 6680950 | 6681050 | 901-Lng-B-T  | 55  | chr15:6680950-6681050 |
| chr15 | 6688750 | 6688850 | 1090-Lng-A-T | 119 | chr15:6688750-6688850 |
| chr15 | 6692050 | 6692150 | 1072-Lng-A-T | 71  | chr15:6692050-6692150 |
| chr15 | 6698150 | 6698250 | 1072-Lng-A-T | 69  | chr15:6698150-6698250 |
| chr15 | 6702050 | 6702150 | 1167-Lng-A-T | 74  | chr15:6702050-6702150 |

**Table S2: SB Insertion regions**

|       |         |         |              |     |                       |
|-------|---------|---------|--------------|-----|-----------------------|
| chr15 | 6702850 | 6702950 | 1274-Lng-A-T | 55  | chr15:6702850-6702950 |
| chr15 | 6704350 | 6704450 | 1004-Lng-A-T | 76  | chr15:6704350-6704450 |
| chr15 | 6723850 | 6723950 | 846-Lng-A-T  | 134 | chr15:6723850-6723950 |
| chr15 | 6730150 | 6730250 | 1188-Lng-A-T | 38  | chr15:6730150-6730250 |
| chr15 | 6739950 | 6740050 | 1167-Lng-A-T | 84  | chr15:6739950-6740050 |
| chr15 | 6751650 | 6751750 | 901-Lng-C-T  | 38  | chr15:6751650-6751750 |
| chr15 | 6758550 | 6758650 | 1065-Lng-B-T | 50  | chr15:6758550-6758650 |
| chr15 | 6762750 | 6762850 | 846-Lng-A-T  | 42  | chr15:6762750-6762850 |
| chr15 | 6791450 | 6791550 | 1090-Lng-B-T | 110 | chr15:6791450-6791550 |
| chr15 | 6795050 | 6795150 | 1065-Lng-A-T | 107 | chr15:6795050-6795150 |
| chr15 | 6831850 | 6831950 | 1004-Lng-A-T | 882 | chr15:6831850-6831950 |
| chr15 | 6913350 | 6913450 | 1065-Lng-B-T | 65  | chr15:6913350-6913450 |
| chr15 | 6914350 | 6914450 | 1223-Lng-A-T | 92  | chr15:6914350-6914450 |
| chr15 | 6989250 | 6989350 | 1167-Lng-A-T | 53  | chr15:6989250-6989350 |
| chr15 | 7000250 | 7000350 | 1274-Lng-A-T | 51  | chr15:7000250-7000350 |
| chr15 | 7030950 | 7031050 | 1090-Lng-A-T | 71  | chr15:7030950-7031050 |
| chr15 | 7032550 | 7032650 | 1065-Lng-C-T | 116 | chr15:7032550-7032650 |
| chr15 | 7053350 | 7053450 | 1065-Lng-A-T | 52  | chr15:7053350-7053450 |
| chr15 | 7055050 | 7055150 | 1223-Lng-C-T | 133 | chr15:7055050-7055150 |
| chr15 | 7056450 | 7056550 | 1100-Lng-A-T | 144 | chr15:7056450-7056550 |
| chr15 | 7083250 | 7083350 | 1223-Lng-B-T | 99  | chr15:7083250-7083350 |
| chr15 | 7095350 | 7095450 | 1065-Lng-A-T | 38  | chr15:7095350-7095450 |
| chr15 | 7106950 | 7107050 | 1188-Lng-A-T | 208 | chr15:7106950-7107050 |
| chr15 | 7117050 | 7117150 | 1188-Lng-A-T | 40  | chr15:7117050-7117150 |
| chr15 | 7135050 | 7135150 | 1223-Lng-A-T | 966 | chr15:7135050-7135150 |
| chr15 | 7144050 | 7144150 | 1090-Lng-A-T | 82  | chr15:7144050-7144150 |
| chr15 | 7149350 | 7149450 | 1151-Lng-A-T | 59  | chr15:7149350-7149450 |
| chr15 | 7173750 | 7173850 | 1274-Lng-A-T | 78  | chr15:7173750-7173850 |
| chr15 | 7220650 | 7220750 | 901-Lng-B-T  | 267 | chr15:7220650-7220750 |
| chr15 | 7367850 | 7367950 | 901-Lng-D-T  | 437 | chr15:7367850-7367950 |
| chr15 | 7414150 | 7414250 | 846-Lng-A-T  | 72  | chr15:7414150-7414250 |
| chr15 | 7479150 | 7479250 | 1072-Lng-A-T | 235 | chr15:7479150-7479250 |
| chr15 | 7511650 | 7511750 | 1223-Lng-C-T | 79  | chr15:7511650-7511750 |
| chr15 | 7513350 | 7513450 | 1065-Lng-A-T | 43  | chr15:7513350-7513450 |
| chr15 | 7523050 | 7523150 | 1065-Lng-A-T | 65  | chr15:7523050-7523150 |
| chr15 | 7524650 | 7524750 | 1223-Lng-B-T | 35  | chr15:7524650-7524750 |
| chr15 | 7535050 | 7535150 | 1065-Lng-A-T | 68  | chr15:7535050-7535150 |
| chr15 | 7539750 | 7539850 | 1065-Lng-C-T | 81  | chr15:7539750-7539850 |
| chr15 | 7542950 | 7543050 | 901-Lng-A-T  | 58  | chr15:7542950-7543050 |
| chr15 | 7614150 | 7614250 | 1167-Lng-A-T | 68  | chr15:7614150-7614250 |
| chr15 | 7664850 | 7664950 | 1065-Lng-B-T | 51  | chr15:7664850-7664950 |
| chr15 | 7666550 | 7666650 | 901-Lng-A-T  | 51  | chr15:7666550-7666650 |
| chr15 | 7736250 | 7736350 | 1223-Lng-B-T | 45  | chr15:7736250-7736350 |
| chr15 | 7742250 | 7742350 | 1072-Lng-A-T | 68  | chr15:7742250-7742350 |
| chr15 | 7742450 | 7742550 | 901-Lng-B-T  | 82  | chr15:7742450-7742550 |
| chr15 | 7773250 | 7773350 | 846-Lng-A-T  | 57  | chr15:7773250-7773350 |

**Table S2: SB Insertion regions**

|       |         |         |              |     |                       |
|-------|---------|---------|--------------|-----|-----------------------|
| chr15 | 7774950 | 7775050 | 1274-Lng-A-T | 71  | chr15:7774950-7775050 |
| chr15 | 7796350 | 7796450 | 1167-Lng-A-T | 269 | chr15:7796350-7796450 |
| chr15 | 7841150 | 7841250 | 1167-Lng-A-T | 46  | chr15:7841150-7841250 |
| chr15 | 7881450 | 7881550 | 1065-Lng-A-T | 141 | chr15:7881450-7881550 |
| chr15 | 7881950 | 7882050 | 1167-Lng-A-T | 145 | chr15:7881950-7882050 |
| chr15 | 7960850 | 7960950 | 1167-Lng-A-T | 212 | chr15:7960850-7960950 |
| chr15 | 7964050 | 7964150 | 1223-Lng-A-T | 160 | chr15:7964050-7964150 |
| chr15 | 8039050 | 8039150 | 901-Lng-D-T  | 273 | chr15:8039050-8039150 |
| chr15 | 8039850 | 8039950 | 901-Lng-C-T  | 65  | chr15:8039850-8039950 |
| chr15 | 8080850 | 8080950 | 901-Lng-A-T  | 150 | chr15:8080850-8080950 |
| chr15 | 8245450 | 8245550 | 1090-Lng-B-T | 244 | chr15:8245450-8245550 |
| chr15 | 8255050 | 8255150 | 901-Lng-C-T  | 55  | chr15:8255050-8255150 |
| chr15 | 8262350 | 8262450 | 1065-Lng-A-T | 57  | chr15:8262350-8262450 |
| chr15 | 8265250 | 8265350 | 1065-Lng-A-T | 42  | chr15:8265250-8265350 |
| chr15 | 8281350 | 8281450 | 901-Lng-D-T  | 146 | chr15:8281350-8281450 |
| chr15 | 8288050 | 8288150 | 1223-Lng-B-T | 55  | chr15:8288050-8288150 |
| chr15 | 8296550 | 8296650 | 1065-Lng-A-T | 66  | chr15:8296550-8296650 |
| chr15 | 8296750 | 8296850 | 1223-Lng-D-T | 45  | chr15:8296750-8296850 |
| chr15 | 8299250 | 8299350 | 1090-Lng-A-T | 50  | chr15:8299250-8299350 |
| chr15 | 8299250 | 8299350 | 1065-Lng-C-T | 106 | chr15:8299250-8299350 |
| chr15 | 8303150 | 8303250 | 1065-Lng-B-T | 88  | chr15:8303150-8303250 |
| chr15 | 8311650 | 8311750 | 1223-Lng-D-T | 54  | chr15:8311650-8311750 |
| chr15 | 8312650 | 8312750 | 901-Lng-C-T  | 266 | chr15:8312650-8312750 |
| chr15 | 8324950 | 8325050 | 1065-Lng-B-T | 76  | chr15:8324950-8325050 |
| chr15 | 8329750 | 8329850 | 1065-Lng-A-T | 65  | chr15:8329750-8329850 |
| chr15 | 8333850 | 8333950 | 1151-Lng-A-T | 62  | chr15:8333850-8333950 |
| chr15 | 8334450 | 8334550 | 901-Lng-C-T  | 45  | chr15:8334450-8334550 |
| chr15 | 8340650 | 8340750 | 1072-Lng-A-T | 249 | chr15:8340650-8340750 |
| chr15 | 8341550 | 8341650 | 1065-Lng-B-T | 54  | chr15:8341550-8341650 |
| chr15 | 8342250 | 8342350 | 846-Lng-A-T  | 90  | chr15:8342250-8342350 |
| chr15 | 8344250 | 8344350 | 1167-Lng-A-T | 82  | chr15:8344250-8344350 |
| chr15 | 8350550 | 8350650 | 1090-Lng-B-T | 259 | chr15:8350550-8350650 |
| chr15 | 8355150 | 8355250 | 1274-Lng-A-T | 92  | chr15:8355150-8355250 |
| chr15 | 8366850 | 8366950 | 1065-Lng-A-T | 129 | chr15:8366850-8366950 |
| chr15 | 8376550 | 8376650 | 1072-Lng-A-T | 90  | chr15:8376550-8376650 |
| chr15 | 8377850 | 8377950 | 1223-Lng-B-T | 37  | chr15:8377850-8377950 |
| chr15 | 8379250 | 8379350 | 1167-Lng-A-T | 61  | chr15:8379250-8379350 |
| chr15 | 8382250 | 8382350 | 901-Lng-C-T  | 59  | chr15:8382250-8382350 |
| chr15 | 8385150 | 8385250 | 1223-Lng-B-T | 84  | chr15:8385150-8385250 |
| chr15 | 8385150 | 8385250 | 901-Lng-A-T  | 239 | chr15:8385150-8385250 |
| chr15 | 8393250 | 8393350 | 901-Lng-A-T  | 96  | chr15:8393250-8393350 |
| chr15 | 8620250 | 8620350 | 1004-Lng-A-T | 74  | chr15:8620250-8620350 |
| chr15 | 8626450 | 8626550 | 901-Lng-A-T  | 380 | chr15:8626450-8626550 |
| chr15 | 8639750 | 8639850 | 1072-Lng-A-T | 154 | chr15:8639750-8639850 |
| chr15 | 8645850 | 8645950 | 1167-Lng-A-T | 50  | chr15:8645850-8645950 |
| chr15 | 8659650 | 8659750 | 1065-Lng-A-T | 94  | chr15:8659650-8659750 |

**Table S2: SB Insertion regions**

|       |         |         |              |      |                       |
|-------|---------|---------|--------------|------|-----------------------|
| chr15 | 8696650 | 8696750 | 1065-Lng-B-T | 53   | chr15:8696650-8696750 |
| chr15 | 8740450 | 8740550 | 1223-Lng-D-T | 55   | chr15:8740450-8740550 |
| chr15 | 8754650 | 8754750 | 901-Lng-B-T  | 95   | chr15:8754650-8754750 |
| chr15 | 8759950 | 8760050 | 1065-Lng-B-T | 65   | chr15:8759950-8760050 |
| chr15 | 8841150 | 8841250 | 1274-Lng-A-T | 79   | chr15:8841150-8841250 |
| chr15 | 8881750 | 8881850 | 1065-Lng-B-T | 111  | chr15:8881750-8881850 |
| chr15 | 8914050 | 8914150 | 1065-Lng-B-T | 58   | chr15:8914050-8914150 |
| chr15 | 8997550 | 8997650 | 1004-Lng-A-T | 696  | chr15:8997550-8997650 |
| chr15 | 9007250 | 9007350 | 1065-Lng-C-T | 2869 | chr15:9007250-9007350 |
| chr15 | 9021250 | 9021350 | 1065-Lng-A-T | 136  | chr15:9021250-9021350 |
| chr15 | 9022250 | 9022350 | 1065-Lng-B-T | 134  | chr15:9022250-9022350 |
| chr15 | 9027150 | 9027250 | 1274-Lng-A-T | 243  | chr15:9027150-9027250 |
| chr15 | 9027250 | 9027350 | 1090-Lng-B-T | 110  | chr15:9027250-9027350 |
| chr15 | 9033450 | 9033550 | 1090-Lng-A-T | 79   | chr15:9033450-9033550 |
| chr15 | 9042950 | 9043050 | 901-Lng-C-T  | 106  | chr15:9042950-9043050 |
| chr15 | 9056650 | 9056750 | 901-Lng-C-T  | 170  | chr15:9056650-9056750 |
| chr15 | 9076150 | 9076250 | 1090-Lng-A-T | 114  | chr15:9076150-9076250 |
| chr15 | 9092550 | 9092650 | 846-Lng-A-T  | 76   | chr15:9092550-9092650 |
| chr15 | 9113550 | 9113650 | 901-Lng-D-T  | 66   | chr15:9113550-9113650 |
| chr15 | 9118250 | 9118350 | 1090-Lng-A-T | 53   | chr15:9118250-9118350 |
| chr15 | 9123650 | 9123750 | 1065-Lng-B-T | 49   | chr15:9123650-9123750 |
| chr15 | 9147850 | 9147950 | 1167-Lng-A-T | 122  | chr15:9147850-9147950 |
| chr15 | 9201250 | 9201350 | 1223-Lng-B-T | 35   | chr15:9201250-9201350 |
| chr15 | 9212250 | 9212350 | 1065-Lng-A-T | 40   | chr15:9212250-9212350 |
| chr15 | 9292650 | 9292750 | 901-Lng-A-T  | 68   | chr15:9292650-9292750 |
| chr15 | 9343850 | 9343950 | 846-Lng-A-T  | 81   | chr15:9343850-9343950 |
| chr15 | 9389050 | 9389150 | 1090-Lng-A-T | 59   | chr15:9389050-9389150 |
| chr15 | 9400950 | 9401050 | 901-Lng-B-T  | 134  | chr15:9400950-9401050 |
| chr15 | 9410150 | 9410250 | 1065-Lng-B-T | 42   | chr15:9410150-9410250 |
| chr15 | 9443350 | 9443450 | 1223-Lng-C-T | 69   | chr15:9443350-9443450 |
| chr15 | 9531250 | 9531350 | 846-Lng-A-T  | 85   | chr15:9531250-9531350 |
| chr15 | 9566350 | 9566450 | 901-Lng-D-T  | 313  | chr15:9566350-9566450 |
| chr15 | 9567750 | 9567850 | 1223-Lng-A-T | 103  | chr15:9567750-9567850 |
| chr15 | 9589950 | 9590050 | 901-Lng-D-T  | 168  | chr15:9589950-9590050 |
| chr15 | 9660950 | 9661050 | 1004-Lng-A-T | 58   | chr15:9660950-9661050 |
| chr15 | 9662150 | 9662250 | 846-Lng-A-T  | 539  | chr15:9662150-9662250 |
| chr15 | 9672750 | 9672850 | 1065-Lng-C-T | 75   | chr15:9672750-9672850 |
| chr15 | 9693750 | 9693850 | 1072-Lng-A-T | 70   | chr15:9693750-9693850 |
| chr15 | 9728250 | 9728350 | 1004-Lng-A-T | 79   | chr15:9728250-9728350 |
| chr15 | 9762850 | 9762950 | 1065-Lng-B-T | 60   | chr15:9762850-9762950 |
| chr15 | 9772250 | 9772350 | 1223-Lng-A-T | 191  | chr15:9772250-9772350 |
| chr15 | 9801850 | 9801950 | 1152-Lng-A-T | 44   | chr15:9801850-9801950 |
| chr15 | 9834250 | 9834350 | 1072-Lng-A-T | 144  | chr15:9834250-9834350 |
| chr15 | 9856450 | 9856550 | 1004-Lng-A-T | 103  | chr15:9856450-9856550 |
| chr15 | 9886150 | 9886250 | 1065-Lng-B-T | 69   | chr15:9886150-9886250 |
| chr15 | 9911150 | 9911250 | 1065-Lng-B-T | 116  | chr15:9911150-9911250 |

**Table S2: SB Insertion regions**

|       |          |          |              |     |                         |
|-------|----------|----------|--------------|-----|-------------------------|
| chr15 | 10001350 | 10001450 | 1065-Lng-C-T | 128 | chr15:10001350-10001450 |
| chr15 | 10062450 | 10062550 | 1004-Lng-A-T | 54  | chr15:10062450-10062550 |
| chr15 | 10075550 | 10075650 | 901-Lng-A-T  | 109 | chr15:10075550-10075650 |
| chr15 | 10107250 | 10107350 | 1090-Lng-A-T | 87  | chr15:10107250-10107350 |
| chr15 | 10172650 | 10172750 | 1065-Lng-B-T | 113 | chr15:10172650-10172750 |
| chr15 | 10211150 | 10211250 | 1223-Lng-B-T | 59  | chr15:10211150-10211250 |
| chr15 | 10218650 | 10218750 | 1223-Lng-A-T | 75  | chr15:10218650-10218750 |
| chr15 | 10257650 | 10257750 | 901-Lng-A-T  | 112 | chr15:10257650-10257750 |
| chr15 | 10340650 | 10340750 | 1072-Lng-A-T | 108 | chr15:10340650-10340750 |
| chr15 | 10378350 | 10378450 | 901-Lng-C-T  | 292 | chr15:10378350-10378450 |
| chr15 | 10393850 | 10393950 | 1065-Lng-B-T | 65  | chr15:10393850-10393950 |
| chr15 | 10398050 | 10398150 | 1151-Lng-A-T | 345 | chr15:10398050-10398150 |
| chr15 | 10404750 | 10404850 | 1223-Lng-C-T | 313 | chr15:10404750-10404850 |
| chr15 | 10406550 | 10406650 | 1065-Lng-C-T | 75  | chr15:10406550-10406650 |
| chr15 | 10411050 | 10411150 | 901-Lng-D-T  | 411 | chr15:10411050-10411150 |
| chr15 | 10434550 | 10434650 | 1223-Lng-C-T | 530 | chr15:10434550-10434650 |
| chr15 | 10497750 | 10497850 | 1152-Lng-A-T | 156 | chr15:10497750-10497850 |
| chr15 | 10505750 | 10505850 | 901-Lng-B-T  | 179 | chr15:10505750-10505850 |
| chr15 | 10507550 | 10507650 | 1072-Lng-A-T | 59  | chr15:10507550-10507650 |
| chr15 | 10527250 | 10527350 | 1065-Lng-B-T | 921 | chr15:10527250-10527350 |
| chr15 | 10528850 | 10528950 | 1065-Lng-B-T | 41  | chr15:10528850-10528950 |
| chr15 | 10549250 | 10549350 | 901-Lng-C-T  | 77  | chr15:10549250-10549350 |
| chr15 | 10578650 | 10578750 | 1065-Lng-B-T | 63  | chr15:10578650-10578750 |
| chr15 | 10579050 | 10579150 | 1274-Lng-A-T | 186 | chr15:10579050-10579150 |
| chr15 | 10585550 | 10585650 | 1223-Lng-B-T | 39  | chr15:10585550-10585650 |
| chr15 | 10587450 | 10587550 | 1004-Lng-A-T | 68  | chr15:10587450-10587550 |
| chr15 | 10597050 | 10597150 | 1004-Lng-A-T | 152 | chr15:10597050-10597150 |
| chr15 | 10621650 | 10621750 | 846-Lng-A-T  | 48  | chr15:10621650-10621750 |
| chr15 | 10641750 | 10641850 | 1004-Lng-A-T | 57  | chr15:10641750-10641850 |
| chr15 | 10690850 | 10690950 | 1065-Lng-A-T | 66  | chr15:10690850-10690950 |
| chr15 | 10709650 | 10709750 | 901-Lng-C-T  | 32  | chr15:10709650-10709750 |
| chr15 | 10722850 | 10722950 | 901-Lng-B-T  | 135 | chr15:10722850-10722950 |
| chr15 | 10753050 | 10753150 | 1090-Lng-B-T | 641 | chr15:10753050-10753150 |
| chr15 | 10758650 | 10758750 | 1223-Lng-C-T | 389 | chr15:10758650-10758750 |
| chr15 | 10774050 | 10774150 | 901-Lng-B-T  | 71  | chr15:10774050-10774150 |
| chr15 | 10830050 | 10830150 | 1065-Lng-B-T | 41  | chr15:10830050-10830150 |
| chr15 | 10837650 | 10837750 | 1065-Lng-C-T | 78  | chr15:10837650-10837750 |
| chr15 | 10846250 | 10846350 | 901-Lng-D-T  | 38  | chr15:10846250-10846350 |
| chr15 | 10865650 | 10865750 | 1167-Lng-A-T | 117 | chr15:10865650-10865750 |
| chr15 | 10904950 | 10905050 | 846-Lng-A-T  | 154 | chr15:10904950-10905050 |
| chr15 | 10939050 | 10939150 | 1090-Lng-A-T | 52  | chr15:10939050-10939150 |
| chr15 | 11035650 | 11035750 | 901-Lng-B-T  | 164 | chr15:11035650-11035750 |
| chr15 | 11086450 | 11086550 | 901-Lng-A-T  | 100 | chr15:11086450-11086550 |
| chr15 | 11093150 | 11093250 | 1223-Lng-C-T | 56  | chr15:11093150-11093250 |
| chr15 | 11095350 | 11095450 | 1065-Lng-A-T | 480 | chr15:11095350-11095450 |
| chr15 | 11239150 | 11239250 | 1167-Lng-A-T | 78  | chr15:11239150-11239250 |

**Table S2: SB Insertion regions**

|       |          |          |              |       |                         |
|-------|----------|----------|--------------|-------|-------------------------|
| chr15 | 11262150 | 11262250 | 1065-Lng-B-T | 94    | chr15:11262150-11262250 |
| chr15 | 11278450 | 11278550 | 901-Lng-C-T  | 85    | chr15:11278450-11278550 |
| chr15 | 11322450 | 11322550 | 1065-Lng-C-T | 62    | chr15:11322450-11322550 |
| chr15 | 11327750 | 11327850 | 901-Lng-C-T  | 36    | chr15:11327750-11327850 |
| chr15 | 11357750 | 11357850 | 901-Lng-D-T  | 206   | chr15:11357750-11357850 |
| chr15 | 11419050 | 11419150 | 1090-Lng-A-T | 839   | chr15:11419050-11419150 |
| chr15 | 11436050 | 11436150 | 846-Lng-A-T  | 110   | chr15:11436050-11436150 |
| chr15 | 11452250 | 11452350 | 1072-Lng-A-T | 82    | chr15:11452250-11452350 |
| chr15 | 11490650 | 11490750 | 901-Lng-B-T  | 66    | chr15:11490650-11490750 |
| chr15 | 11518950 | 11519050 | 901-Lng-A-T  | 281   | chr15:11518950-11519050 |
| chr15 | 11547750 | 11547850 | 1072-Lng-A-T | 78    | chr15:11547750-11547850 |
| chr15 | 11547750 | 11547850 | 1004-Lng-A-T | 79    | chr15:11547750-11547850 |
| chr15 | 11585750 | 11585850 | 1274-Lng-A-T | 58    | chr15:11585750-11585850 |
| chr15 | 11595750 | 11595850 | 901-Lng-C-T  | 133   | chr15:11595750-11595850 |
| chr15 | 11619450 | 11619550 | 1072-Lng-A-T | 66    | chr15:11619450-11619550 |
| chr15 | 11623150 | 11623250 | 1065-Lng-A-T | 52    | chr15:11623150-11623250 |
| chr15 | 11674250 | 11674350 | 1167-Lng-A-T | 47    | chr15:11674250-11674350 |
| chr15 | 11703350 | 11703450 | 1065-Lng-A-T | 59    | chr15:11703350-11703450 |
| chr15 | 11782450 | 11782550 | 1223-Lng-A-T | 188   | chr15:11782450-11782550 |
| chr15 | 11804550 | 11804650 | 1090-Lng-A-T | 74    | chr15:11804550-11804650 |
| chr15 | 11840550 | 11840650 | 1223-Lng-C-T | 70    | chr15:11840550-11840650 |
| chr15 | 11840650 | 11840750 | 1072-Lng-A-T | 53    | chr15:11840650-11840750 |
| chr15 | 11891050 | 11891150 | 1065-Lng-B-T | 48    | chr15:11891050-11891150 |
| chr15 | 11912550 | 11912650 | 1223-Lng-D-T | 41    | chr15:11912550-11912650 |
| chr15 | 11915750 | 11915850 | 1223-Lng-B-T | 41    | chr15:11915750-11915850 |
| chr15 | 11919250 | 11919350 | 1188-Lng-A-T | 35    | chr15:11919250-11919350 |
| chr15 | 11937450 | 11937550 | 1188-Lng-A-T | 83    | chr15:11937450-11937550 |
| chr15 | 11939250 | 11939350 | 1065-Lng-B-T | 59    | chr15:11939250-11939350 |
| chr15 | 11940850 | 11940950 | 901-Lng-B-T  | 403   | chr15:11940850-11940950 |
| chr15 | 11958650 | 11958750 | 1065-Lng-B-T | 67    | chr15:11958650-11958750 |
| chr15 | 11968950 | 11969050 | 1065-Lng-B-T | 80    | chr15:11968950-11969050 |
| chr15 | 12044750 | 12044850 | 901-Lng-C-T  | 282   | chr15:12044750-12044850 |
| chr15 | 12053250 | 12053350 | 1152-Lng-A-T | 49    | chr15:12053250-12053350 |
| chr15 | 12058350 | 12058450 | 1072-Lng-A-T | 57    | chr15:12058350-12058450 |
| chr15 | 12059250 | 12059350 | 901-Lng-B-T  | 152   | chr15:12059250-12059350 |
| chr15 | 12065750 | 12065850 | 1223-Lng-A-T | 160   | chr15:12065750-12065850 |
| chr15 | 12069850 | 12069950 | 1004-Lng-A-T | 96    | chr15:12069850-12069950 |
| chr15 | 12084550 | 12084650 | 1167-Lng-A-T | 149   | chr15:12084550-12084650 |
| chr15 | 12084650 | 12084750 | 1090-Lng-A-T | 108   | chr15:12084650-12084750 |
| chr15 | 12086450 | 12086550 | 1065-Lng-B-T | 42    | chr15:12086450-12086550 |
| chr15 | 12086450 | 12086550 | 1223-Lng-A-T | 1834  | chr15:12086450-12086550 |
| chr15 | 12088850 | 12088950 | 846-Lng-A-T  | 173   | chr15:12088850-12088950 |
| chr15 | 12090150 | 12090250 | 1223-Lng-D-T | 221   | chr15:12090150-12090250 |
| chr15 | 12094150 | 12094250 | 901-Lng-B-T  | 120   | chr15:12094150-12094250 |
| chr15 | 12106950 | 12107050 | 1223-Lng-A-T | 74    | chr15:12106950-12107050 |
| chr15 | 12107650 | 12107750 | 1072-Lng-A-T | 12322 | chr15:12107650-12107750 |



**Table S2: SB Insertion regions**

|       |          |          |              |       |                         |
|-------|----------|----------|--------------|-------|-------------------------|
| chr15 | 12110450 | 12110550 | 1100-Lng-A-T | 78    | chr15:12110450-12110550 |
| chr15 | 12115250 | 12115350 | 1004-Lng-A-T | 69    | chr15:12115250-12115350 |
| chr15 | 12159750 | 12159850 | 1223-Lng-B-T | 34    | chr15:12159750-12159850 |
| chr15 | 12165950 | 12166050 | 1065-Lng-A-T | 615   | chr15:12165950-12166050 |
| chr15 | 12171750 | 12171850 | 1065-Lng-B-T | 55    | chr15:12171750-12171850 |
| chr15 | 12172750 | 12172850 | 1223-Lng-D-T | 44    | chr15:12172750-12172850 |
| chr15 | 12174850 | 12174950 | 1065-Lng-A-T | 49    | chr15:12174850-12174950 |
| chr15 | 12175650 | 12175750 | 1004-Lng-A-T | 85    | chr15:12175650-12175750 |
| chr15 | 12187750 | 12187850 | 901-Lng-A-T  | 112   | chr15:12187750-12187850 |
| chr15 | 12187750 | 12187850 | 1072-Lng-A-T | 50    | chr15:12187750-12187850 |
| chr15 | 12195650 | 12195750 | 1065-Lng-A-T | 99    | chr15:12195650-12195750 |
| chr15 | 12205450 | 12205550 | 1223-Lng-A-T | 299   | chr15:12205450-12205550 |
| chr15 | 12236150 | 12236250 | 1072-Lng-A-T | 185   | chr15:12236150-12236250 |
| chr15 | 12255250 | 12255350 | 901-Lng-A-T  | 79    | chr15:12255250-12255350 |
| chr15 | 12259350 | 12259450 | 1152-Lng-A-T | 929   | chr15:12259350-12259450 |
| chr15 | 12263250 | 12263350 | 1274-Lng-A-T | 55    | chr15:12263250-12263350 |
| chr15 | 12269850 | 12269950 | 1223-Lng-A-T | 97    | chr15:12269850-12269950 |
| chr15 | 12275750 | 12275850 | 1151-Lng-A-T | 253   | chr15:12275750-12275850 |
| chr15 | 12282750 | 12282850 | 1065-Lng-C-T | 3175  | chr15:12282750-12282850 |
| chr15 | 12286950 | 12287050 | 846-Lng-A-T  | 144   | chr15:12286950-12287050 |
| chr15 | 12334750 | 12334850 | 1065-Lng-C-T | 104   | chr15:12334750-12334850 |
| chr15 | 12357950 | 12358050 | 1223-Lng-C-T | 45    | chr15:12357950-12358050 |
| chr15 | 12415750 | 12415850 | 1100-Lng-B-T | 53    | chr15:12415750-12415850 |
| chr15 | 12415950 | 12416050 | 1004-Lng-A-T | 66    | chr15:12415950-12416050 |
| chr15 | 12428550 | 12428650 | 901-Lng-A-T  | 81    | chr15:12428550-12428650 |
| chr15 | 12482250 | 12482350 | 1152-Lng-A-T | 82    | chr15:12482250-12482350 |
| chr15 | 12574950 | 12575050 | 901-Lng-B-T  | 52    | chr15:12574950-12575050 |
| chr15 | 12592150 | 12592250 | 901-Lng-B-T  | 83    | chr15:12592150-12592250 |
| chr15 | 12599350 | 12599450 | 1223-Lng-A-T | 81    | chr15:12599350-12599450 |
| chr15 | 12600050 | 12600150 | 1223-Lng-A-T | 360   | chr15:12600050-12600150 |
| chr15 | 12609650 | 12609750 | 1090-Lng-A-T | 73    | chr15:12609650-12609750 |
| chr15 | 12658450 | 12658550 | 1167-Lng-A-T | 102   | chr15:12658450-12658550 |
| chr15 | 12695450 | 12695550 | 1223-Lng-A-T | 53    | chr15:12695450-12695550 |
| chr15 | 12760450 | 12760550 | 846-Lng-A-T  | 45    | chr15:12760450-12760550 |
| chr15 | 12771350 | 12771450 | 1152-Lng-A-T | 84    | chr15:12771350-12771450 |
| chr15 | 12800150 | 12800250 | 1223-Lng-A-T | 234   | chr15:12800150-12800250 |
| chr15 | 12815050 | 12815150 | 1072-Lng-A-T | 81    | chr15:12815050-12815150 |
| chr15 | 12828350 | 12828450 | 1090-Lng-A-T | 345   | chr15:12828350-12828450 |
| chr15 | 12837150 | 12837250 | 901-Lng-C-T  | 171   | chr15:12837150-12837250 |
| chr15 | 12852150 | 12852250 | 1065-Lng-C-T | 2423  | chr15:12852150-12852250 |
| chr15 | 12937550 | 12937650 | 1090-Lng-B-T | 458   | chr15:12937550-12937650 |
| chr15 | 12955350 | 12955450 | 1090-Lng-A-T | 88    | chr15:12955350-12955450 |
| chr15 | 13015250 | 13015350 | 1004-Lng-A-T | 19042 | chr15:13015250-13015350 |
| chr15 | 13015850 | 13015950 | 1004-Lng-A-T | 57    | chr15:13015850-13015950 |
| chr15 | 13089050 | 13089150 | 1065-Lng-B-T | 67    | chr15:13089050-13089150 |
| chr15 | 13142350 | 13142450 | 1072-Lng-A-T | 245   | chr15:13142350-13142450 |

**Table S2: SB Insertion regions**

|       |          |          |              |     |                         |
|-------|----------|----------|--------------|-----|-------------------------|
| chr15 | 13200050 | 13200150 | 901-Lng-C-T  | 30  | chr15:13200050-13200150 |
| chr15 | 13238950 | 13239050 | 1072-Lng-A-T | 106 | chr15:13238950-13239050 |
| chr15 | 13259850 | 13259950 | 1072-Lng-A-T | 253 | chr15:13259850-13259950 |
| chr15 | 13261550 | 13261650 | 1223-Lng-B-T | 61  | chr15:13261550-13261650 |
| chr15 | 13348750 | 13348850 | 1188-Lng-A-T | 120 | chr15:13348750-13348850 |
| chr15 | 13390850 | 13390950 | 1223-Lng-B-T | 43  | chr15:13390850-13390950 |
| chr15 | 13396250 | 13396350 | 901-Lng-A-T  | 236 | chr15:13396250-13396350 |
| chr15 | 13407950 | 13408050 | 1072-Lng-A-T | 153 | chr15:13407950-13408050 |
| chr15 | 13474550 | 13474650 | 901-Lng-C-T  | 87  | chr15:13474550-13474650 |
| chr15 | 13479750 | 13479850 | 1065-Lng-B-T | 125 | chr15:13479750-13479850 |
| chr15 | 13505250 | 13505350 | 1004-Lng-A-T | 139 | chr15:13505250-13505350 |
| chr15 | 13541150 | 13541250 | 1072-Lng-A-T | 131 | chr15:13541150-13541250 |
| chr15 | 13558150 | 13558250 | 901-Lng-A-T  | 209 | chr15:13558150-13558250 |
| chr15 | 13608250 | 13608350 | 901-Lng-A-T  | 90  | chr15:13608250-13608350 |
| chr15 | 13653350 | 13653450 | 1090-Lng-B-T | 775 | chr15:13653350-13653450 |
| chr15 | 13681150 | 13681250 | 1065-Lng-A-T | 53  | chr15:13681150-13681250 |
| chr15 | 13693850 | 13693950 | 1065-Lng-B-T | 41  | chr15:13693850-13693950 |
| chr15 | 13716550 | 13716650 | 1223-Lng-A-T | 230 | chr15:13716550-13716650 |
| chr15 | 13771750 | 13771850 | 1223-Lng-B-T | 361 | chr15:13771750-13771850 |
| chr15 | 13785850 | 13785950 | 901-Lng-C-T  | 220 | chr15:13785850-13785950 |
| chr15 | 13808850 | 13808950 | 1072-Lng-A-T | 60  | chr15:13808850-13808950 |
| chr15 | 13864150 | 13864250 | 1090-Lng-A-T | 68  | chr15:13864150-13864250 |
| chr15 | 13888450 | 13888550 | 1072-Lng-A-T | 53  | chr15:13888450-13888550 |
| chr15 | 13923550 | 13923650 | 846-Lng-A-T  | 138 | chr15:13923550-13923650 |
| chr15 | 13956450 | 13956550 | 901-Lng-C-T  | 161 | chr15:13956450-13956550 |
| chr15 | 13975050 | 13975150 | 1065-Lng-B-T | 47  | chr15:13975050-13975150 |
| chr15 | 13987550 | 13987650 | 1072-Lng-A-T | 48  | chr15:13987550-13987650 |
| chr15 | 13988850 | 13988950 | 1065-Lng-A-T | 91  | chr15:13988850-13988950 |
| chr15 | 14006950 | 14007050 | 901-Lng-C-T  | 31  | chr15:14006950-14007050 |
| chr15 | 14077450 | 14077550 | 1152-Lng-A-T | 123 | chr15:14077450-14077550 |
| chr15 | 14094850 | 14094950 | 1065-Lng-B-T | 207 | chr15:14094850-14094950 |
| chr15 | 14104150 | 14104250 | 1065-Lng-B-T | 77  | chr15:14104150-14104250 |
| chr15 | 14114350 | 14114450 | 901-Lng-B-T  | 256 | chr15:14114350-14114450 |
| chr15 | 14124450 | 14124550 | 901-Lng-B-T  | 185 | chr15:14124450-14124550 |
| chr15 | 14201450 | 14201550 | 1072-Lng-A-T | 215 | chr15:14201450-14201550 |
| chr15 | 14203350 | 14203450 | 1004-Lng-A-T | 59  | chr15:14203350-14203450 |
| chr15 | 14255150 | 14255250 | 846-Lng-A-T  | 214 | chr15:14255150-14255250 |
| chr15 | 14318750 | 14318850 | 1152-Lng-A-T | 62  | chr15:14318750-14318850 |
| chr15 | 14329950 | 14330050 | 1065-Lng-B-T | 83  | chr15:14329950-14330050 |
| chr15 | 14343750 | 14343850 | 1004-Lng-A-T | 105 | chr15:14343750-14343850 |
| chr15 | 14384950 | 14385050 | 1072-Lng-A-T | 189 | chr15:14384950-14385050 |
| chr15 | 14440250 | 14440350 | 1072-Lng-A-T | 68  | chr15:14440250-14440350 |
| chr15 | 14444750 | 14444850 | 846-Lng-A-T  | 106 | chr15:14444750-14444850 |
| chr15 | 14448450 | 14448550 | 1065-Lng-B-T | 46  | chr15:14448450-14448550 |
| chr15 | 14450750 | 14450850 | 1065-Lng-A-T | 55  | chr15:14450750-14450850 |
| chr15 | 14513050 | 14513150 | 1151-Lng-A-T | 229 | chr15:14513050-14513150 |

**Table S2: SB Insertion regions**

|       |          |          |              |     |                         |
|-------|----------|----------|--------------|-----|-------------------------|
| chr15 | 14514250 | 14514350 | 1223-Lng-B-T | 41  | chr15:14514250-14514350 |
| chr15 | 14527350 | 14527450 | 1065-Lng-A-T | 39  | chr15:14527350-14527450 |
| chr15 | 14538850 | 14538950 | 901-Lng-A-T  | 66  | chr15:14538850-14538950 |
| chr15 | 14559550 | 14559650 | 1090-Lng-A-T | 89  | chr15:14559550-14559650 |
| chr15 | 14608250 | 14608350 | 846-Lng-A-T  | 207 | chr15:14608250-14608350 |
| chr15 | 14676150 | 14676250 | 1072-Lng-A-T | 71  | chr15:14676150-14676250 |
| chr15 | 14676250 | 14676350 | 1090-Lng-A-T | 55  | chr15:14676250-14676350 |
| chr15 | 14676850 | 14676950 | 1223-Lng-B-T | 69  | chr15:14676850-14676950 |
| chr15 | 14677850 | 14677950 | 846-Lng-A-T  | 87  | chr15:14677850-14677950 |
| chr15 | 14685650 | 14685750 | 1090-Lng-B-T | 550 | chr15:14685650-14685750 |
| chr15 | 14767750 | 14767850 | 1090-Lng-A-T | 142 | chr15:14767750-14767850 |
| chr15 | 14792650 | 14792750 | 901-Lng-B-T  | 231 | chr15:14792650-14792750 |
| chr15 | 14800250 | 14800350 | 901-Lng-B-T  | 90  | chr15:14800250-14800350 |
| chr15 | 14809650 | 14809750 | 901-Lng-C-T  | 31  | chr15:14809650-14809750 |
| chr15 | 14814550 | 14814650 | 1065-Lng-A-T | 69  | chr15:14814550-14814650 |
| chr15 | 14817950 | 14818050 | 1004-Lng-A-T | 59  | chr15:14817950-14818050 |
| chr15 | 14838650 | 14838750 | 846-Lng-A-T  | 132 | chr15:14838650-14838750 |
| chr15 | 14880650 | 14880750 | 1072-Lng-A-T | 53  | chr15:14880650-14880750 |
| chr15 | 14891350 | 14891450 | 1072-Lng-A-T | 59  | chr15:14891350-14891450 |
| chr15 | 14942050 | 14942150 | 1065-Lng-A-T | 38  | chr15:14942050-14942150 |
| chr15 | 14958550 | 14958650 | 1151-Lng-A-T | 91  | chr15:14958550-14958650 |
| chr15 | 14969350 | 14969450 | 1152-Lng-A-T | 84  | chr15:14969350-14969450 |
| chr15 | 14972750 | 14972850 | 901-Lng-A-T  | 134 | chr15:14972750-14972850 |
| chr15 | 15009050 | 15009150 | 1065-Lng-A-T | 52  | chr15:15009050-15009150 |
| chr15 | 15014450 | 15014550 | 1072-Lng-A-T | 81  | chr15:15014450-15014550 |
| chr15 | 15018150 | 15018250 | 901-Lng-C-T  | 42  | chr15:15018150-15018250 |
| chr15 | 15029050 | 15029150 | 901-Lng-B-T  | 144 | chr15:15029050-15029150 |
| chr15 | 15041450 | 15041550 | 901-Lng-A-T  | 167 | chr15:15041450-15041550 |
| chr15 | 15041650 | 15041750 | 1065-Lng-B-T | 40  | chr15:15041650-15041750 |
| chr15 | 15051050 | 15051150 | 1072-Lng-A-T | 116 | chr15:15051050-15051150 |
| chr15 | 15052950 | 15053050 | 1090-Lng-A-T | 60  | chr15:15052950-15053050 |
| chr15 | 15055550 | 15055650 | 1090-Lng-A-T | 75  | chr15:15055550-15055650 |
| chr15 | 15100950 | 15101050 | 1065-Lng-B-T | 47  | chr15:15100950-15101050 |
| chr15 | 15150050 | 15150150 | 1072-Lng-A-T | 89  | chr15:15150050-15150150 |
| chr15 | 15158050 | 15158150 | 1065-Lng-A-T | 73  | chr15:15158050-15158150 |
| chr15 | 15202950 | 15203050 | 1223-Lng-A-T | 662 | chr15:15202950-15203050 |
| chr15 | 15206750 | 15206850 | 1072-Lng-A-T | 149 | chr15:15206750-15206850 |
| chr15 | 15207050 | 15207150 | 1065-Lng-B-T | 447 | chr15:15207050-15207150 |
| chr15 | 15236850 | 15236950 | 901-Lng-A-T  | 113 | chr15:15236850-15236950 |
| chr15 | 15258350 | 15258450 | 901-Lng-C-T  | 301 | chr15:15258350-15258450 |
| chr15 | 15259650 | 15259750 | 1072-Lng-A-T | 120 | chr15:15259650-15259750 |
| chr15 | 15296850 | 15296950 | 1072-Lng-A-T | 75  | chr15:15296850-15296950 |
| chr15 | 15297150 | 15297250 | 1004-Lng-A-T | 107 | chr15:15297150-15297250 |
| chr15 | 15358950 | 15359050 | 1065-Lng-B-T | 76  | chr15:15358950-15359050 |
| chr15 | 15390450 | 15390550 | 1090-Lng-A-T | 84  | chr15:15390450-15390550 |
| chr15 | 15419850 | 15419950 | 1065-Lng-B-T | 81  | chr15:15419850-15419950 |

**Table S2: SB Insertion regions**

|       |          |          |              |     |                         |
|-------|----------|----------|--------------|-----|-------------------------|
| chr15 | 15442950 | 15443050 | 846-Lng-A-T  | 46  | chr15:15442950-15443050 |
| chr15 | 15465450 | 15465550 | 901-Lng-B-T  | 219 | chr15:15465450-15465550 |
| chr15 | 15469950 | 15470050 | 1090-Lng-A-T | 68  | chr15:15469950-15470050 |
| chr15 | 15502650 | 15502750 | 1223-Lng-A-T | 244 | chr15:15502650-15502750 |
| chr15 | 15543150 | 15543250 | 901-Lng-C-T  | 37  | chr15:15543150-15543250 |
| chr15 | 15544750 | 15544850 | 1223-Lng-A-T | 152 | chr15:15544750-15544850 |
| chr15 | 15551850 | 15551950 | 1090-Lng-A-T | 44  | chr15:15551850-15551950 |
| chr15 | 15552850 | 15552950 | 901-Lng-C-T  | 72  | chr15:15552850-15552950 |
| chr15 | 15566650 | 15566750 | 1223-Lng-A-T | 192 | chr15:15566650-15566750 |
| chr15 | 15567750 | 15567850 | 901-Lng-C-T  | 63  | chr15:15567750-15567850 |
| chr15 | 15600550 | 15600650 | 901-Lng-D-T  | 320 | chr15:15600550-15600650 |
| chr15 | 15602150 | 15602250 | 901-Lng-A-T  | 77  | chr15:15602150-15602250 |
| chr15 | 15690250 | 15690350 | 901-Lng-C-T  | 70  | chr15:15690250-15690350 |
| chr15 | 15700550 | 15700650 | 846-Lng-A-T  | 186 | chr15:15700550-15700650 |
| chr15 | 15708250 | 15708350 | 1065-Lng-A-T | 513 | chr15:15708250-15708350 |
| chr15 | 15787850 | 15787950 | 1065-Lng-B-T | 48  | chr15:15787850-15787950 |
| chr15 | 15806450 | 15806550 | 901-Lng-C-T  | 41  | chr15:15806450-15806550 |
| chr15 | 15808250 | 15808350 | 1188-Lng-A-T | 293 | chr15:15808250-15808350 |
| chr15 | 15828650 | 15828750 | 1072-Lng-A-T | 68  | chr15:15828650-15828750 |
| chr15 | 15874450 | 15874550 | 846-Lng-A-T  | 102 | chr15:15874450-15874550 |
| chr15 | 15904750 | 15904850 | 1090-Lng-A-T | 546 | chr15:15904750-15904850 |
| chr15 | 15905650 | 15905750 | 1065-Lng-A-T | 159 | chr15:15905650-15905750 |
| chr15 | 15909450 | 15909550 | 901-Lng-A-T  | 104 | chr15:15909450-15909550 |
| chr15 | 15928750 | 15928850 | 1223-Lng-A-T | 295 | chr15:15928750-15928850 |
| chr15 | 15940950 | 15941050 | 901-Lng-A-T  | 64  | chr15:15940950-15941050 |
| chr15 | 15944550 | 15944650 | 901-Lng-A-T  | 70  | chr15:15944550-15944650 |
| chr15 | 15959050 | 15959150 | 1072-Lng-A-T | 113 | chr15:15959050-15959150 |
| chr15 | 15960650 | 15960750 | 1090-Lng-B-T | 339 | chr15:15960650-15960750 |
| chr15 | 15993150 | 15993250 | 1065-Lng-B-T | 118 | chr15:15993150-15993250 |
| chr15 | 16001750 | 16001850 | 901-Lng-C-T  | 30  | chr15:16001750-16001850 |
| chr15 | 16018950 | 16019050 | 1065-Lng-B-T | 39  | chr15:16018950-16019050 |
| chr15 | 16168750 | 16168850 | 1090-Lng-A-T | 103 | chr15:16168750-16168850 |
| chr15 | 16171250 | 16171350 | 1065-Lng-B-T | 161 | chr15:16171250-16171350 |
| chr15 | 16171950 | 16172050 | 1090-Lng-A-T | 90  | chr15:16171950-16172050 |
| chr15 | 16242450 | 16242550 | 1065-Lng-C-T | 65  | chr15:16242450-16242550 |
| chr15 | 16335050 | 16335150 | 1223-Lng-A-T | 60  | chr15:16335050-16335150 |
| chr15 | 16344150 | 16344250 | 1065-Lng-C-T | 91  | chr15:16344150-16344250 |
| chr15 | 16358550 | 16358650 | 1065-Lng-C-T | 96  | chr15:16358550-16358650 |
| chr15 | 16365650 | 16365750 | 1072-Lng-A-T | 48  | chr15:16365650-16365750 |
| chr15 | 16402250 | 16402350 | 901-Lng-B-T  | 66  | chr15:16402250-16402350 |
| chr15 | 16466850 | 16466950 | 846-Lng-A-T  | 80  | chr15:16466850-16466950 |
| chr15 | 16473450 | 16473550 | 1274-Lng-A-T | 49  | chr15:16473450-16473550 |
| chr15 | 16484450 | 16484550 | 1065-Lng-B-T | 64  | chr15:16484450-16484550 |
| chr15 | 16528750 | 16528850 | 1072-Lng-A-T | 175 | chr15:16528750-16528850 |
| chr15 | 16559450 | 16559550 | 1072-Lng-A-T | 67  | chr15:16559450-16559550 |
| chr15 | 16573050 | 16573150 | 1223-Lng-B-T | 58  | chr15:16573050-16573150 |

**Table S2: SB Insertion regions**

|       |          |          |              |      |                         |
|-------|----------|----------|--------------|------|-------------------------|
| chr15 | 16597350 | 16597450 | 901-Lng-A-T  | 331  | chr15:16597350-16597450 |
| chr15 | 16598750 | 16598850 | 1152-Lng-A-T | 33   | chr15:16598750-16598850 |
| chr15 | 16614550 | 16614650 | 901-Lng-B-T  | 219  | chr15:16614550-16614650 |
| chr15 | 16623650 | 16623750 | 1072-Lng-A-T | 67   | chr15:16623650-16623750 |
| chr15 | 16639750 | 16639850 | 1223-Lng-C-T | 49   | chr15:16639750-16639850 |
| chr15 | 16642550 | 16642650 | 846-Lng-A-T  | 75   | chr15:16642550-16642650 |
| chr15 | 16645950 | 16646050 | 1065-Lng-B-T | 78   | chr15:16645950-16646050 |
| chr15 | 16676350 | 16676450 | 1072-Lng-A-T | 67   | chr15:16676350-16676450 |
| chr15 | 16683250 | 16683350 | 901-Lng-C-T  | 44   | chr15:16683250-16683350 |
| chr15 | 16703450 | 16703550 | 1065-Lng-C-T | 63   | chr15:16703450-16703550 |
| chr15 | 16714650 | 16714750 | 1065-Lng-B-T | 44   | chr15:16714650-16714750 |
| chr15 | 16750250 | 16750350 | 1004-Lng-A-T | 51   | chr15:16750250-16750350 |
| chr15 | 16763950 | 16764050 | 1004-Lng-A-T | 107  | chr15:16763950-16764050 |
| chr15 | 16782850 | 16782950 | 901-Lng-C-T  | 263  | chr15:16782850-16782950 |
| chr15 | 16786950 | 16787050 | 846-Lng-A-T  | 45   | chr15:16786950-16787050 |
| chr15 | 16894550 | 16894650 | 1065-Lng-A-T | 77   | chr15:16894550-16894650 |
| chr15 | 16916750 | 16916850 | 1065-Lng-B-T | 86   | chr15:16916750-16916850 |
| chr15 | 16956050 | 16956150 | 1072-Lng-A-T | 169  | chr15:16956050-16956150 |
| chr15 | 16992850 | 16992950 | 1004-Lng-A-T | 65   | chr15:16992850-16992950 |
| chr15 | 17000750 | 17000850 | 901-Lng-C-T  | 161  | chr15:17000750-17000850 |
| chr15 | 17053950 | 17054050 | 1065-Lng-C-T | 154  | chr15:17053950-17054050 |
| chr15 | 17059150 | 17059250 | 901-Lng-A-T  | 112  | chr15:17059150-17059250 |
| chr15 | 17151550 | 17151650 | 1065-Lng-A-T | 71   | chr15:17151550-17151650 |
| chr15 | 17165950 | 17166050 | 1065-Lng-B-T | 84   | chr15:17165950-17166050 |
| chr15 | 17193950 | 17194050 | 1004-Lng-A-T | 59   | chr15:17193950-17194050 |
| chr15 | 17195650 | 17195750 | 1065-Lng-B-T | 92   | chr15:17195650-17195750 |
| chr15 | 17195650 | 17195750 | 1065-Lng-A-T | 53   | chr15:17195650-17195750 |
| chr15 | 17212050 | 17212150 | 901-Lng-A-T  | 191  | chr15:17212050-17212150 |
| chr15 | 17219450 | 17219550 | 1072-Lng-A-T | 108  | chr15:17219450-17219550 |
| chr15 | 17232350 | 17232450 | 1065-Lng-C-T | 202  | chr15:17232350-17232450 |
| chr15 | 17233850 | 17233950 | 901-Lng-C-T  | 29   | chr15:17233850-17233950 |
| chr15 | 17266950 | 17267050 | 1065-Lng-C-T | 1603 | chr15:17266950-17267050 |
| chr15 | 17304650 | 17304750 | 1065-Lng-B-T | 108  | chr15:17304650-17304750 |
| chr15 | 17351150 | 17351250 | 846-Lng-A-T  | 43   | chr15:17351150-17351250 |
| chr15 | 17354450 | 17354550 | 1065-Lng-A-T | 95   | chr15:17354450-17354550 |
| chr15 | 17367450 | 17367550 | 901-Lng-A-T  | 110  | chr15:17367450-17367550 |
| chr15 | 17371650 | 17371750 | 846-Lng-A-T  | 459  | chr15:17371650-17371750 |
| chr15 | 17403250 | 17403350 | 901-Lng-A-T  | 81   | chr15:17403250-17403350 |
| chr15 | 17427150 | 17427250 | 1065-Lng-C-T | 829  | chr15:17427150-17427250 |
| chr15 | 17455950 | 17456050 | 901-Lng-A-T  | 60   | chr15:17455950-17456050 |
| chr15 | 17488750 | 17488850 | 1100-Lng-A-T | 77   | chr15:17488750-17488850 |
| chr15 | 17495450 | 17495550 | 1065-Lng-A-T | 90   | chr15:17495450-17495550 |
| chr15 | 17584350 | 17584450 | 1065-Lng-A-T | 65   | chr15:17584350-17584450 |
| chr15 | 17591450 | 17591550 | 1223-Lng-A-T | 147  | chr15:17591450-17591550 |
| chr15 | 17598450 | 17598550 | 1090-Lng-A-T | 81   | chr15:17598450-17598550 |
| chr15 | 17611750 | 17611850 | 1065-Lng-A-T | 158  | chr15:17611750-17611850 |

**Table S2: SB Insertion regions**

|       |          |          |              |     |                         |
|-------|----------|----------|--------------|-----|-------------------------|
| chr15 | 17618750 | 17618850 | 1223-Lng-A-T | 514 | chr15:17618750-17618850 |
| chr15 | 17634850 | 17634950 | 1065-Lng-A-T | 84  | chr15:17634850-17634950 |
| chr15 | 17645650 | 17645750 | 1065-Lng-C-T | 74  | chr15:17645650-17645750 |
| chr15 | 17695650 | 17695750 | 1223-Lng-B-T | 70  | chr15:17695650-17695750 |
| chr15 | 17709450 | 17709550 | 1065-Lng-A-T | 75  | chr15:17709450-17709550 |
| chr15 | 17742450 | 17742550 | 1065-Lng-A-T | 151 | chr15:17742450-17742550 |
| chr15 | 17784650 | 17784750 | 1065-Lng-A-T | 41  | chr15:17784650-17784750 |
| chr15 | 17797850 | 17797950 | 901-Lng-C-T  | 60  | chr15:17797850-17797950 |
| chr15 | 17799850 | 17799950 | 901-Lng-A-T  | 127 | chr15:17799850-17799950 |
| chr15 | 17881150 | 17881250 | 1100-Lng-B-T | 173 | chr15:17881150-17881250 |
| chr15 | 17917250 | 17917350 | 1065-Lng-A-T | 68  | chr15:17917250-17917350 |
| chr15 | 17928550 | 17928650 | 1065-Lng-A-T | 114 | chr15:17928550-17928650 |
| chr15 | 17933350 | 17933450 | 1065-Lng-C-T | 91  | chr15:17933350-17933450 |
| chr15 | 17963850 | 17963950 | 1072-Lng-A-T | 69  | chr15:17963850-17963950 |
| chr15 | 18019150 | 18019250 | 1065-Lng-B-T | 69  | chr15:18019150-18019250 |
| chr15 | 18033950 | 18034050 | 1065-Lng-B-T | 70  | chr15:18033950-18034050 |
| chr15 | 18045950 | 18046050 | 1065-Lng-A-T | 45  | chr15:18045950-18046050 |
| chr15 | 18089850 | 18089950 | 1072-Lng-A-T | 184 | chr15:18089850-18089950 |
| chr15 | 18129450 | 18129550 | 1004-Lng-A-T | 120 | chr15:18129450-18129550 |
| chr15 | 18204550 | 18204650 | 846-Lng-A-T  | 215 | chr15:18204550-18204650 |
| chr15 | 18210750 | 18210850 | 901-Lng-C-T  | 68  | chr15:18210750-18210850 |
| chr15 | 18220950 | 18221050 | 1223-Lng-C-T | 53  | chr15:18220950-18221050 |
| chr15 | 18227150 | 18227250 | 901-Lng-A-T  | 69  | chr15:18227150-18227250 |
| chr15 | 18295650 | 18295750 | 901-Lng-B-T  | 139 | chr15:18295650-18295750 |
| chr15 | 18316750 | 18316850 | 846-Lng-A-T  | 47  | chr15:18316750-18316850 |
| chr15 | 18346950 | 18347050 | 901-Lng-C-T  | 97  | chr15:18346950-18347050 |
| chr15 | 18355450 | 18355550 | 901-Lng-A-T  | 89  | chr15:18355450-18355550 |
| chr15 | 18365250 | 18365350 | 1065-Lng-B-T | 67  | chr15:18365250-18365350 |
| chr15 | 18418150 | 18418250 | 901-Lng-A-T  | 105 | chr15:18418150-18418250 |
| chr15 | 18446350 | 18446450 | 1065-Lng-A-T | 119 | chr15:18446350-18446450 |
| chr15 | 18480550 | 18480650 | 1065-Lng-B-T | 72  | chr15:18480550-18480650 |
| chr15 | 18531250 | 18531350 | 901-Lng-D-T  | 141 | chr15:18531250-18531350 |
| chr15 | 18532950 | 18533050 | 901-Lng-A-T  | 56  | chr15:18532950-18533050 |
| chr15 | 18545850 | 18545950 | 1223-Lng-B-T | 36  | chr15:18545850-18545950 |
| chr15 | 18631450 | 18631550 | 1072-Lng-A-T | 80  | chr15:18631450-18631550 |
| chr15 | 18673550 | 18673650 | 1090-Lng-B-T | 298 | chr15:18673550-18673650 |
| chr15 | 18704150 | 18704250 | 901-Lng-C-T  | 268 | chr15:18704150-18704250 |
| chr15 | 18712650 | 18712750 | 901-Lng-C-T  | 31  | chr15:18712650-18712750 |
| chr15 | 18740850 | 18740950 | 901-Lng-C-T  | 47  | chr15:18740850-18740950 |
| chr15 | 18749550 | 18749650 | 846-Lng-A-T  | 85  | chr15:18749550-18749650 |
| chr15 | 18752850 | 18752950 | 901-Lng-D-T  | 67  | chr15:18752850-18752950 |
| chr15 | 18755950 | 18756050 | 1152-Lng-A-T | 102 | chr15:18755950-18756050 |
| chr15 | 18791550 | 18791650 | 1065-Lng-B-T | 43  | chr15:18791550-18791650 |
| chr15 | 18845750 | 18845850 | 846-Lng-A-T  | 147 | chr15:18845750-18845850 |
| chr15 | 18847950 | 18848050 | 1004-Lng-A-T | 53  | chr15:18847950-18848050 |
| chr15 | 18864650 | 18864750 | 1072-Lng-A-T | 52  | chr15:18864650-18864750 |

**Table S2: SB Insertion regions**

|       |          |          |              |     |                         |
|-------|----------|----------|--------------|-----|-------------------------|
| chr15 | 18896150 | 18896250 | 1065-Lng-C-T | 91  | chr15:18896150-18896250 |
| chr15 | 18909850 | 18909950 | 1065-Lng-B-T | 81  | chr15:18909850-18909950 |
| chr15 | 18911750 | 18911850 | 1151-Lng-A-T | 66  | chr15:18911750-18911850 |
| chr15 | 18927450 | 18927550 | 1090-Lng-B-T | 95  | chr15:18927450-18927550 |
| chr15 | 18958350 | 18958450 | 1065-Lng-B-T | 39  | chr15:18958350-18958450 |
| chr15 | 19012550 | 19012650 | 1065-Lng-A-T | 86  | chr15:19012550-19012650 |
| chr15 | 19153150 | 19153250 | 1065-Lng-B-T | 61  | chr15:19153150-19153250 |
| chr15 | 19166050 | 19166150 | 1065-Lng-B-T | 69  | chr15:19166050-19166150 |
| chr15 | 19209250 | 19209350 | 1065-Lng-A-T | 38  | chr15:19209250-19209350 |
| chr15 | 19211850 | 19211950 | 1090-Lng-A-T | 83  | chr15:19211850-19211950 |
| chr15 | 19216650 | 19216750 | 1004-Lng-A-T | 70  | chr15:19216650-19216750 |
| chr15 | 19319250 | 19319350 | 846-Lng-A-T  | 116 | chr15:19319250-19319350 |
| chr15 | 19322850 | 19322950 | 1223-Lng-A-T | 91  | chr15:19322850-19322950 |
| chr15 | 19327550 | 19327650 | 901-Lng-A-T  | 58  | chr15:19327550-19327650 |
| chr15 | 19345350 | 19345450 | 1004-Lng-A-T | 381 | chr15:19345350-19345450 |
| chr15 | 19354350 | 19354450 | 1065-Lng-A-T | 78  | chr15:19354350-19354450 |
| chr15 | 19354650 | 19354750 | 1065-Lng-B-T | 69  | chr15:19354650-19354750 |
| chr15 | 19367450 | 19367550 | 1151-Lng-A-T | 213 | chr15:19367450-19367550 |
| chr15 | 19368750 | 19368850 | 1090-Lng-A-T | 59  | chr15:19368750-19368850 |
| chr15 | 19387850 | 19387950 | 901-Lng-B-T  | 167 | chr15:19387850-19387950 |
| chr15 | 19401550 | 19401650 | 1065-Lng-C-T | 66  | chr15:19401550-19401650 |
| chr15 | 19406850 | 19406950 | 846-Lng-A-T  | 105 | chr15:19406850-19406950 |
| chr15 | 19476850 | 19476950 | 1065-Lng-B-T | 73  | chr15:19476850-19476950 |
| chr15 | 19553950 | 19554050 | 1223-Lng-B-T | 36  | chr15:19553950-19554050 |
| chr15 | 19562550 | 19562650 | 1065-Lng-C-T | 75  | chr15:19562550-19562650 |
| chr15 | 19584250 | 19584350 | 1090-Lng-B-T | 388 | chr15:19584250-19584350 |
| chr15 | 19622150 | 19622250 | 901-Lng-B-T  | 101 | chr15:19622150-19622250 |
| chr15 | 19622150 | 19622250 | 1065-Lng-B-T | 59  | chr15:19622150-19622250 |
| chr15 | 19626150 | 19626250 | 1223-Lng-B-T | 183 | chr15:19626150-19626250 |
| chr15 | 19653950 | 19654050 | 1065-Lng-B-T | 47  | chr15:19653950-19654050 |
| chr15 | 19687150 | 19687250 | 1223-Lng-C-T | 44  | chr15:19687150-19687250 |
| chr15 | 19709450 | 19709550 | 1065-Lng-B-T | 40  | chr15:19709450-19709550 |
| chr15 | 19730350 | 19730450 | 1188-Lng-A-T | 34  | chr15:19730350-19730450 |
| chr15 | 19747250 | 19747350 | 1065-Lng-B-T | 60  | chr15:19747250-19747350 |
| chr15 | 19801950 | 19802050 | 1223-Lng-B-T | 69  | chr15:19801950-19802050 |
| chr15 | 19837950 | 19838050 | 1223-Lng-C-T | 67  | chr15:19837950-19838050 |
| chr15 | 19868950 | 19869050 | 1152-Lng-A-T | 54  | chr15:19868950-19869050 |
| chr15 | 19882750 | 19882850 | 1065-Lng-B-T | 47  | chr15:19882750-19882850 |
| chr15 | 19900450 | 19900550 | 1065-Lng-B-T | 72  | chr15:19900450-19900550 |
| chr15 | 19907850 | 19907950 | 1065-Lng-B-T | 39  | chr15:19907850-19907950 |
| chr15 | 19913050 | 19913150 | 1223-Lng-C-T | 43  | chr15:19913050-19913150 |
| chr15 | 19959750 | 19959850 | 1065-Lng-B-T | 76  | chr15:19959750-19959850 |
| chr15 | 19964050 | 19964150 | 901-Lng-A-T  | 340 | chr15:19964050-19964150 |
| chr15 | 19971950 | 19972050 | 1100-Lng-A-T | 102 | chr15:19971950-19972050 |
| chr15 | 20021450 | 20021550 | 901-Lng-D-T  | 344 | chr15:20021450-20021550 |
| chr15 | 20023750 | 20023850 | 1223-Lng-A-T | 270 | chr15:20023750-20023850 |

**Table S2: SB Insertion regions**

|       |          |          |              |     |                         |
|-------|----------|----------|--------------|-----|-------------------------|
| chr15 | 20056650 | 20056750 | 901-Lng-D-T  | 62  | chr15:20056650-20056750 |
| chr15 | 20057250 | 20057350 | 901-Lng-C-T  | 164 | chr15:20057250-20057350 |
| chr15 | 20061450 | 20061550 | 901-Lng-B-T  | 430 | chr15:20061450-20061550 |
| chr15 | 20066450 | 20066550 | 901-Lng-B-T  | 103 | chr15:20066450-20066550 |
| chr15 | 20073850 | 20073950 | 1072-Lng-A-T | 159 | chr15:20073850-20073950 |
| chr15 | 20082050 | 20082150 | 1152-Lng-A-T | 43  | chr15:20082050-20082150 |
| chr15 | 20136250 | 20136350 | 1223-Lng-A-T | 125 | chr15:20136250-20136350 |
| chr15 | 20159650 | 20159750 | 1065-Lng-C-T | 62  | chr15:20159650-20159750 |
| chr15 | 20179550 | 20179650 | 1004-Lng-A-T | 74  | chr15:20179550-20179650 |
| chr15 | 20189050 | 20189150 | 1065-Lng-A-T | 78  | chr15:20189050-20189150 |
| chr15 | 20193850 | 20193950 | 1004-Lng-A-T | 51  | chr15:20193850-20193950 |
| chr15 | 20209550 | 20209650 | 1223-Lng-A-T | 116 | chr15:20209550-20209650 |
| chr15 | 20212050 | 20212150 | 901-Lng-C-T  | 47  | chr15:20212050-20212150 |
| chr15 | 20312650 | 20312750 | 901-Lng-C-T  | 75  | chr15:20312650-20312750 |
| chr15 | 20315250 | 20315350 | 901-Lng-D-T  | 82  | chr15:20315250-20315350 |
| chr15 | 20423450 | 20423550 | 1090-Lng-A-T | 380 | chr15:20423450-20423550 |
| chr15 | 20491850 | 20491950 | 1065-Lng-C-T | 80  | chr15:20491850-20491950 |
| chr15 | 20493850 | 20493950 | 1065-Lng-A-T | 515 | chr15:20493850-20493950 |
| chr15 | 20496850 | 20496950 | 1223-Lng-D-T | 45  | chr15:20496850-20496950 |
| chr15 | 20501150 | 20501250 | 901-Lng-A-T  | 61  | chr15:20501150-20501250 |
| chr15 | 20528750 | 20528850 | 1004-Lng-A-T | 103 | chr15:20528750-20528850 |
| chr15 | 20531850 | 20531950 | 901-Lng-A-T  | 90  | chr15:20531850-20531950 |
| chr15 | 20542950 | 20543050 | 1065-Lng-B-T | 265 | chr15:20542950-20543050 |
| chr15 | 20557550 | 20557650 | 1072-Lng-A-T | 132 | chr15:20557550-20557650 |
| chr15 | 20611150 | 20611250 | 901-Lng-D-T  | 90  | chr15:20611150-20611250 |
| chr15 | 20621150 | 20621250 | 846-Lng-A-T  | 104 | chr15:20621150-20621250 |
| chr15 | 20626950 | 20627050 | 1072-Lng-A-T | 113 | chr15:20626950-20627050 |
| chr15 | 20637950 | 20638050 | 901-Lng-A-T  | 126 | chr15:20637950-20638050 |
| chr15 | 20642350 | 20642450 | 1065-Lng-A-T | 685 | chr15:20642350-20642450 |
| chr15 | 20681950 | 20682050 | 1072-Lng-A-T | 64  | chr15:20681950-20682050 |
| chr15 | 20709750 | 20709850 | 1223-Lng-A-T | 164 | chr15:20709750-20709850 |
| chr15 | 20749150 | 20749250 | 1004-Lng-A-T | 57  | chr15:20749150-20749250 |
| chr15 | 20750350 | 20750450 | 1004-Lng-A-T | 80  | chr15:20750350-20750450 |
| chr15 | 20776450 | 20776550 | 846-Lng-A-T  | 130 | chr15:20776450-20776550 |
| chr15 | 20793050 | 20793150 | 1065-Lng-C-T | 95  | chr15:20793050-20793150 |
| chr15 | 20797950 | 20798050 | 1065-Lng-A-T | 73  | chr15:20797950-20798050 |
| chr15 | 20804450 | 20804550 | 1223-Lng-C-T | 44  | chr15:20804450-20804550 |
| chr15 | 20815250 | 20815350 | 901-Lng-A-T  | 125 | chr15:20815250-20815350 |
| chr15 | 20818350 | 20818450 | 1004-Lng-A-T | 55  | chr15:20818350-20818450 |
| chr15 | 20822150 | 20822250 | 1223-Lng-A-T | 60  | chr15:20822150-20822250 |
| chr15 | 20835250 | 20835350 | 901-Lng-D-T  | 40  | chr15:20835250-20835350 |
| chr15 | 20860050 | 20860150 | 1065-Lng-A-T | 189 | chr15:20860050-20860150 |
| chr15 | 20886050 | 20886150 | 1072-Lng-A-T | 52  | chr15:20886050-20886150 |
| chr15 | 20886150 | 20886250 | 1072-Lng-A-T | 90  | chr15:20886150-20886250 |
| chr15 | 20912250 | 20912350 | 1065-Lng-C-T | 99  | chr15:20912250-20912350 |
| chr15 | 20912750 | 20912850 | 1090-Lng-A-T | 74  | chr15:20912750-20912850 |



**Table S2: SB Insertion regions**

|       |          |          |              |     |                         |
|-------|----------|----------|--------------|-----|-------------------------|
| chr15 | 20921950 | 20922050 | 1065-Lng-B-T | 41  | chr15:20921950-20922050 |
| chr15 | 20947550 | 20947650 | 1151-Lng-A-T | 78  | chr15:20947550-20947650 |
| chr15 | 20972350 | 20972450 | 1152-Lng-A-T | 63  | chr15:20972350-20972450 |
| chr15 | 20998850 | 20998950 | 1090-Lng-B-T | 837 | chr15:20998850-20998950 |
| chr15 | 21023350 | 21023450 | 901-Lng-C-T  | 31  | chr15:21023350-21023450 |
| chr15 | 21064450 | 21064550 | 901-Lng-A-T  | 99  | chr15:21064450-21064550 |
| chr15 | 21162150 | 21162250 | 901-Lng-B-T  | 395 | chr15:21162150-21162250 |
| chr15 | 21184850 | 21184950 | 901-Lng-C-T  | 29  | chr15:21184850-21184950 |
| chr15 | 21215150 | 21215250 | 1072-Lng-A-T | 150 | chr15:21215150-21215250 |
| chr15 | 21242050 | 21242150 | 1072-Lng-A-T | 200 | chr15:21242050-21242150 |
| chr15 | 21255450 | 21255550 | 1065-Lng-A-T | 58  | chr15:21255450-21255550 |
| chr15 | 21302650 | 21302750 | 1065-Lng-C-T | 63  | chr15:21302650-21302750 |
| chr15 | 21302850 | 21302950 | 1065-Lng-B-T | 62  | chr15:21302850-21302950 |
| chr15 | 21331850 | 21331950 | 846-Lng-A-T  | 50  | chr15:21331850-21331950 |
| chr15 | 21358650 | 21358750 | 1065-Lng-C-T | 69  | chr15:21358650-21358750 |
| chr15 | 21362650 | 21362750 | 1065-Lng-C-T | 80  | chr15:21362650-21362750 |
| chr15 | 21430450 | 21430550 | 1065-Lng-B-T | 46  | chr15:21430450-21430550 |
| chr15 | 21443650 | 21443750 | 1065-Lng-C-T | 79  | chr15:21443650-21443750 |
| chr15 | 21457850 | 21457950 | 1065-Lng-B-T | 84  | chr15:21457850-21457950 |
| chr15 | 21470850 | 21470950 | 1090-Lng-B-T | 82  | chr15:21470850-21470950 |
| chr15 | 21477450 | 21477550 | 1065-Lng-A-T | 72  | chr15:21477450-21477550 |
| chr15 | 21487350 | 21487450 | 1004-Lng-A-T | 99  | chr15:21487350-21487450 |
| chr15 | 21526050 | 21526150 | 901-Lng-D-T  | 62  | chr15:21526050-21526150 |
| chr15 | 21534750 | 21534850 | 901-Lng-B-T  | 225 | chr15:21534750-21534850 |
| chr15 | 21547450 | 21547550 | 901-Lng-C-T  | 48  | chr15:21547450-21547550 |
| chr15 | 21553650 | 21553750 | 901-Lng-D-T  | 171 | chr15:21553650-21553750 |
| chr15 | 21556050 | 21556150 | 1065-Lng-C-T | 86  | chr15:21556050-21556150 |
| chr15 | 21604450 | 21604550 | 1090-Lng-A-T | 59  | chr15:21604450-21604550 |
| chr15 | 21629150 | 21629250 | 901-Lng-A-T  | 51  | chr15:21629150-21629250 |
| chr15 | 21631550 | 21631650 | 1090-Lng-A-T | 66  | chr15:21631550-21631650 |
| chr15 | 21697350 | 21697450 | 901-Lng-D-T  | 233 | chr15:21697350-21697450 |
| chr15 | 21768150 | 21768250 | 1065-Lng-A-T | 56  | chr15:21768150-21768250 |
| chr15 | 21779650 | 21779750 | 1223-Lng-C-T | 289 | chr15:21779650-21779750 |
| chr15 | 21817650 | 21817750 | 1223-Lng-A-T | 79  | chr15:21817650-21817750 |
| chr15 | 21829650 | 21829750 | 901-Lng-C-T  | 91  | chr15:21829650-21829750 |
| chr15 | 21863050 | 21863150 | 901-Lng-D-T  | 258 | chr15:21863050-21863150 |
| chr15 | 21881950 | 21882050 | 846-Lng-A-T  | 73  | chr15:21881950-21882050 |
| chr15 | 21904150 | 21904250 | 1072-Lng-A-T | 67  | chr15:21904150-21904250 |
| chr15 | 21934150 | 21934250 | 1065-Lng-A-T | 70  | chr15:21934150-21934250 |
| chr15 | 21958650 | 21958750 | 1065-Lng-C-T | 76  | chr15:21958650-21958750 |
| chr15 | 22074150 | 22074250 | 901-Lng-D-T  | 374 | chr15:22074150-22074250 |
| chr15 | 22075350 | 22075450 | 1223-Lng-B-T | 49  | chr15:22075350-22075450 |
| chr15 | 22114150 | 22114250 | 846-Lng-A-T  | 151 | chr15:22114150-22114250 |
| chr15 | 22168150 | 22168250 | 1223-Lng-C-T | 52  | chr15:22168150-22168250 |
| chr15 | 22180350 | 22180450 | 1065-Lng-C-T | 86  | chr15:22180350-22180450 |
| chr15 | 22188850 | 22188950 | 1065-Lng-B-T | 229 | chr15:22188850-22188950 |

**Table S2: SB Insertion regions**

|       |          |          |              |     |                         |
|-------|----------|----------|--------------|-----|-------------------------|
| chr15 | 22192250 | 22192350 | 1223-Lng-C-T | 106 | chr15:22192250-22192350 |
| chr15 | 22211850 | 22211950 | 1223-Lng-A-T | 163 | chr15:22211850-22211950 |
| chr15 | 22267450 | 22267550 | 901-Lng-A-T  | 74  | chr15:22267450-22267550 |
| chr15 | 22293750 | 22293850 | 1065-Lng-B-T | 76  | chr15:22293750-22293850 |
| chr15 | 22301850 | 22301950 | 901-Lng-D-T  | 661 | chr15:22301850-22301950 |
| chr15 | 22318550 | 22318650 | 901-Lng-A-T  | 478 | chr15:22318550-22318650 |
| chr15 | 22354350 | 22354450 | 1090-Lng-A-T | 83  | chr15:22354350-22354450 |
| chr15 | 22360650 | 22360750 | 1065-Lng-B-T | 254 | chr15:22360650-22360750 |
| chr15 | 22368850 | 22368950 | 1065-Lng-C-T | 120 | chr15:22368850-22368950 |
| chr15 | 22395250 | 22395350 | 1065-Lng-B-T | 48  | chr15:22395250-22395350 |
| chr15 | 22397750 | 22397850 | 901-Lng-A-T  | 52  | chr15:22397750-22397850 |
| chr15 | 22399150 | 22399250 | 901-Lng-B-T  | 90  | chr15:22399150-22399250 |
| chr15 | 22450950 | 22451050 | 1004-Lng-A-T | 84  | chr15:22450950-22451050 |
| chr15 | 22456950 | 22457050 | 1223-Lng-D-T | 40  | chr15:22456950-22457050 |
| chr15 | 22463750 | 22463850 | 1223-Lng-A-T | 99  | chr15:22463750-22463850 |
| chr15 | 22464550 | 22464650 | 1072-Lng-A-T | 86  | chr15:22464550-22464650 |
| chr15 | 22474850 | 22474950 | 1065-Lng-A-T | 50  | chr15:22474850-22474950 |
| chr15 | 22480350 | 22480450 | 1065-Lng-A-T | 481 | chr15:22480350-22480450 |
| chr15 | 22482150 | 22482250 | 1090-Lng-B-T | 116 | chr15:22482150-22482250 |
| chr15 | 22495350 | 22495450 | 1065-Lng-B-T | 40  | chr15:22495350-22495450 |
| chr15 | 22511650 | 22511750 | 901-Lng-D-T  | 382 | chr15:22511650-22511750 |
| chr15 | 22518450 | 22518550 | 1167-Lng-A-T | 76  | chr15:22518450-22518550 |
| chr15 | 22535650 | 22535750 | 1274-Lng-A-T | 55  | chr15:22535650-22535750 |
| chr15 | 22559650 | 22559750 | 1090-Lng-A-T | 58  | chr15:22559650-22559750 |
| chr15 | 22566050 | 22566150 | 901-Lng-A-T  | 63  | chr15:22566050-22566150 |
| chr15 | 22566950 | 22567050 | 1065-Lng-B-T | 144 | chr15:22566950-22567050 |
| chr15 | 22612850 | 22612950 | 1065-Lng-A-T | 203 | chr15:22612850-22612950 |
| chr15 | 22708850 | 22708950 | 1223-Lng-B-T | 36  | chr15:22708850-22708950 |
| chr15 | 22727550 | 22727650 | 1065-Lng-C-T | 75  | chr15:22727550-22727650 |
| chr15 | 22764850 | 22764950 | 901-Lng-B-T  | 153 | chr15:22764850-22764950 |
| chr15 | 22819750 | 22819850 | 901-Lng-C-T  | 91  | chr15:22819750-22819850 |
| chr15 | 22872450 | 22872550 | 1065-Lng-B-T | 435 | chr15:22872450-22872550 |
| chr15 | 22881750 | 22881850 | 1223-Lng-A-T | 102 | chr15:22881750-22881850 |
| chr15 | 22896350 | 22896450 | 1065-Lng-A-T | 80  | chr15:22896350-22896450 |
| chr15 | 22901450 | 22901550 | 901-Lng-B-T  | 197 | chr15:22901450-22901550 |
| chr15 | 22904450 | 22904550 | 1004-Lng-A-T | 52  | chr15:22904450-22904550 |
| chr15 | 22919850 | 22919950 | 846-Lng-A-T  | 70  | chr15:22919850-22919950 |
| chr15 | 22941850 | 22941950 | 1065-Lng-B-T | 61  | chr15:22941850-22941950 |
| chr15 | 22944650 | 22944750 | 901-Lng-C-T  | 57  | chr15:22944650-22944750 |
| chr15 | 22946350 | 22946450 | 846-Lng-A-T  | 93  | chr15:22946350-22946450 |
| chr15 | 22997550 | 22997650 | 1188-Lng-A-T | 57  | chr15:22997550-22997650 |
| chr15 | 23029050 | 23029150 | 1090-Lng-A-T | 85  | chr15:23029050-23029150 |
| chr15 | 23051050 | 23051150 | 1090-Lng-B-T | 894 | chr15:23051050-23051150 |
| chr15 | 23065050 | 23065150 | 1065-Lng-C-T | 74  | chr15:23065050-23065150 |
| chr15 | 23066450 | 23066550 | 1004-Lng-A-T | 50  | chr15:23066450-23066550 |
| chr15 | 23082650 | 23082750 | 1065-Lng-B-T | 168 | chr15:23082650-23082750 |

**Table S2: SB Insertion regions**

|       |          |          |              |     |                         |
|-------|----------|----------|--------------|-----|-------------------------|
| chr15 | 23089150 | 23089250 | 1065-Lng-B-T | 92  | chr15:23089150-23089250 |
| chr15 | 23100350 | 23100450 | 901-Lng-B-T  | 110 | chr15:23100350-23100450 |
| chr15 | 23131850 | 23131950 | 1065-Lng-A-T | 67  | chr15:23131850-23131950 |
| chr15 | 23186350 | 23186450 | 1065-Lng-B-T | 53  | chr15:23186350-23186450 |
| chr15 | 23215850 | 23215950 | 1223-Lng-C-T | 43  | chr15:23215850-23215950 |
| chr15 | 23247850 | 23247950 | 1065-Lng-B-T | 81  | chr15:23247850-23247950 |
| chr15 | 23309550 | 23309650 | 1223-Lng-A-T | 82  | chr15:23309550-23309650 |
| chr15 | 23311750 | 23311850 | 901-Lng-A-T  | 65  | chr15:23311750-23311850 |
| chr15 | 23317050 | 23317150 | 1004-Lng-A-T | 65  | chr15:23317050-23317150 |
| chr15 | 23318450 | 23318550 | 846-Lng-A-T  | 69  | chr15:23318450-23318550 |
| chr15 | 23347250 | 23347350 | 1065-Lng-B-T | 89  | chr15:23347250-23347350 |
| chr15 | 23354350 | 23354450 | 901-Lng-C-T  | 648 | chr15:23354350-23354450 |
| chr15 | 23371950 | 23372050 | 1065-Lng-A-T | 44  | chr15:23371950-23372050 |
| chr15 | 23383950 | 23384050 | 1065-Lng-C-T | 76  | chr15:23383950-23384050 |
| chr15 | 23400850 | 23400950 | 1223-Lng-A-T | 225 | chr15:23400850-23400950 |
| chr15 | 23446550 | 23446650 | 1223-Lng-B-T | 38  | chr15:23446550-23446650 |
| chr15 | 23456650 | 23456750 | 1223-Lng-A-T | 51  | chr15:23456650-23456750 |
| chr15 | 23484850 | 23484950 | 901-Lng-C-T  | 63  | chr15:23484850-23484950 |
| chr15 | 23485050 | 23485150 | 1152-Lng-A-T | 77  | chr15:23485050-23485150 |
| chr15 | 23487850 | 23487950 | 1065-Lng-B-T | 46  | chr15:23487850-23487950 |
| chr15 | 23497850 | 23497950 | 1065-Lng-A-T | 45  | chr15:23497850-23497950 |
| chr15 | 23508150 | 23508250 | 1004-Lng-A-T | 697 | chr15:23508150-23508250 |
| chr15 | 23512350 | 23512450 | 1065-Lng-B-T | 61  | chr15:23512350-23512450 |
| chr15 | 23514550 | 23514650 | 901-Lng-C-T  | 72  | chr15:23514550-23514650 |
| chr15 | 23521750 | 23521850 | 1065-Lng-C-T | 61  | chr15:23521750-23521850 |
| chr15 | 23534250 | 23534350 | 1090-Lng-B-T | 223 | chr15:23534250-23534350 |
| chr15 | 23545050 | 23545150 | 1065-Lng-B-T | 47  | chr15:23545050-23545150 |
| chr15 | 23555250 | 23555350 | 901-Lng-D-T  | 405 | chr15:23555250-23555350 |
| chr15 | 23571250 | 23571350 | 1090-Lng-B-T | 330 | chr15:23571250-23571350 |
| chr15 | 23596050 | 23596150 | 1065-Lng-B-T | 67  | chr15:23596050-23596150 |
| chr15 | 23597650 | 23597750 | 1004-Lng-A-T | 236 | chr15:23597650-23597750 |
| chr15 | 23601450 | 23601550 | 1065-Lng-B-T | 92  | chr15:23601450-23601550 |
| chr15 | 23626550 | 23626650 | 1004-Lng-A-T | 475 | chr15:23626550-23626650 |
| chr15 | 23627450 | 23627550 | 1065-Lng-A-T | 60  | chr15:23627450-23627550 |
| chr15 | 23676450 | 23676550 | 1072-Lng-A-T | 137 | chr15:23676450-23676550 |
| chr15 | 23692450 | 23692550 | 1065-Lng-A-T | 54  | chr15:23692450-23692550 |
| chr15 | 23718550 | 23718650 | 1065-Lng-A-T | 39  | chr15:23718550-23718650 |
| chr15 | 23742150 | 23742250 | 846-Lng-A-T  | 118 | chr15:23742150-23742250 |
| chr15 | 23747750 | 23747850 | 1223-Lng-A-T | 130 | chr15:23747750-23747850 |
| chr15 | 23749750 | 23749850 | 1065-Lng-B-T | 293 | chr15:23749750-23749850 |
| chr15 | 23756950 | 23757050 | 1065-Lng-C-T | 419 | chr15:23756950-23757050 |
| chr15 | 23758350 | 23758450 | 901-Lng-B-T  | 207 | chr15:23758350-23758450 |
| chr15 | 23835850 | 23835950 | 901-Lng-A-T  | 206 | chr15:23835850-23835950 |
| chr15 | 23836950 | 23837050 | 1223-Lng-A-T | 51  | chr15:23836950-23837050 |
| chr15 | 23839350 | 23839450 | 1072-Lng-A-T | 53  | chr15:23839350-23839450 |
| chr15 | 23864250 | 23864350 | 901-Lng-B-T  | 77  | chr15:23864250-23864350 |

**Table S2: SB Insertion regions**

|       |          |          |              |      |                         |
|-------|----------|----------|--------------|------|-------------------------|
| chr15 | 23877350 | 23877450 | 1065-Lng-A-T | 42   | chr15:23877350-23877450 |
| chr15 | 23883750 | 23883850 | 1223-Lng-A-T | 1267 | chr15:23883750-23883850 |
| chr15 | 23907350 | 23907450 | 901-Lng-A-T  | 95   | chr15:23907350-23907450 |
| chr15 | 23914150 | 23914250 | 1065-Lng-C-T | 76   | chr15:23914150-23914250 |
| chr15 | 23922750 | 23922850 | 1065-Lng-B-T | 54   | chr15:23922750-23922850 |
| chr15 | 23956950 | 23957050 | 1072-Lng-A-T | 56   | chr15:23956950-23957050 |
| chr15 | 23980150 | 23980250 | 901-Lng-A-T  | 62   | chr15:23980150-23980250 |
| chr15 | 23984550 | 23984650 | 1223-Lng-A-T | 543  | chr15:23984550-23984650 |
| chr15 | 24017150 | 24017250 | 1065-Lng-A-T | 87   | chr15:24017150-24017250 |
| chr15 | 24019950 | 24020050 | 1274-Lng-A-T | 117  | chr15:24019950-24020050 |
| chr15 | 24022150 | 24022250 | 1065-Lng-B-T | 62   | chr15:24022150-24022250 |
| chr15 | 24046150 | 24046250 | 1223-Lng-A-T | 701  | chr15:24046150-24046250 |
| chr15 | 24061350 | 24061450 | 1065-Lng-B-T | 63   | chr15:24061350-24061450 |
| chr15 | 24082850 | 24082950 | 1065-Lng-C-T | 68   | chr15:24082850-24082950 |
| chr15 | 24094350 | 24094450 | 1065-Lng-B-T | 43   | chr15:24094350-24094450 |
| chr15 | 24120850 | 24120950 | 1065-Lng-C-T | 91   | chr15:24120850-24120950 |
| chr15 | 24181250 | 24181350 | 846-Lng-A-T  | 66   | chr15:24181250-24181350 |
| chr15 | 24225850 | 24225950 | 1223-Lng-A-T | 133  | chr15:24225850-24225950 |
| chr15 | 24238250 | 24238350 | 1090-Lng-A-T | 85   | chr15:24238250-24238350 |
| chr15 | 24255650 | 24255750 | 1065-Lng-A-T | 35   | chr15:24255650-24255750 |
| chr15 | 24295750 | 24295850 | 1065-Lng-C-T | 76   | chr15:24295750-24295850 |
| chr15 | 24329050 | 24329150 | 1065-Lng-C-T | 62   | chr15:24329050-24329150 |
| chr15 | 24333150 | 24333250 | 1065-Lng-B-T | 56   | chr15:24333150-24333250 |
| chr15 | 24338950 | 24339050 | 1223-Lng-B-T | 231  | chr15:24338950-24339050 |
| chr15 | 24357450 | 24357550 | 1065-Lng-B-T | 53   | chr15:24357450-24357550 |
| chr15 | 24384350 | 24384450 | 1065-Lng-B-T | 269  | chr15:24384350-24384450 |
| chr15 | 24408050 | 24408150 | 901-Lng-C-T  | 55   | chr15:24408050-24408150 |
| chr15 | 24410550 | 24410650 | 1223-Lng-C-T | 45   | chr15:24410550-24410650 |
| chr15 | 24414450 | 24414550 | 1090-Lng-A-T | 84   | chr15:24414450-24414550 |
| chr15 | 24497950 | 24498050 | 1072-Lng-A-T | 158  | chr15:24497950-24498050 |
| chr15 | 24581850 | 24581950 | 901-Lng-C-T  | 76   | chr15:24581850-24581950 |
| chr15 | 24628050 | 24628150 | 1090-Lng-A-T | 84   | chr15:24628050-24628150 |
| chr15 | 24635950 | 24636050 | 1223-Lng-C-T | 59   | chr15:24635950-24636050 |
| chr15 | 24648550 | 24648650 | 901-Lng-C-T  | 38   | chr15:24648550-24648650 |
| chr15 | 24667050 | 24667150 | 846-Lng-A-T  | 92   | chr15:24667050-24667150 |
| chr15 | 24676650 | 24676750 | 901-Lng-A-T  | 219  | chr15:24676650-24676750 |
| chr15 | 24701850 | 24701950 | 1065-Lng-B-T | 65   | chr15:24701850-24701950 |
| chr15 | 24879950 | 24880050 | 901-Lng-D-T  | 44   | chr15:24879950-24880050 |
| chr15 | 24900150 | 24900250 | 901-Lng-A-T  | 290  | chr15:24900150-24900250 |
| chr15 | 24918750 | 24918850 | 1065-Lng-B-T | 46   | chr15:24918750-24918850 |
| chr15 | 24923450 | 24923550 | 1065-Lng-A-T | 37   | chr15:24923450-24923550 |
| chr15 | 25070650 | 25070750 | 1090-Lng-A-T | 87   | chr15:25070650-25070750 |
| chr15 | 25078350 | 25078450 | 1223-Lng-D-T | 138  | chr15:25078350-25078450 |
| chr15 | 25118750 | 25118850 | 1072-Lng-A-T | 191  | chr15:25118750-25118850 |
| chr15 | 25140750 | 25140850 | 846-Lng-A-T  | 77   | chr15:25140750-25140850 |
| chr15 | 25170650 | 25170750 | 1065-Lng-C-T | 66   | chr15:25170650-25170750 |

**Table S2: SB Insertion regions**

|       |          |          |              |      |                         |
|-------|----------|----------|--------------|------|-------------------------|
| chr15 | 25181750 | 25181850 | 1223-Lng-A-T | 54   | chr15:25181750-25181850 |
| chr15 | 25195450 | 25195550 | 1065-Lng-C-T | 90   | chr15:25195450-25195550 |
| chr15 | 25224250 | 25224350 | 1004-Lng-A-T | 113  | chr15:25224250-25224350 |
| chr15 | 25271050 | 25271150 | 1223-Lng-B-T | 343  | chr15:25271050-25271150 |
| chr15 | 25325650 | 25325750 | 1223-Lng-A-T | 54   | chr15:25325650-25325750 |
| chr15 | 25428450 | 25428550 | 1090-Lng-A-T | 72   | chr15:25428450-25428550 |
| chr15 | 25443750 | 25443850 | 1090-Lng-A-T | 71   | chr15:25443750-25443850 |
| chr15 | 25468950 | 25469050 | 1090-Lng-A-T | 486  | chr15:25468950-25469050 |
| chr15 | 25479450 | 25479550 | 901-Lng-A-T  | 103  | chr15:25479450-25479550 |
| chr15 | 25516550 | 25516650 | 901-Lng-D-T  | 215  | chr15:25516550-25516650 |
| chr15 | 25527350 | 25527450 | 1065-Lng-B-T | 192  | chr15:25527350-25527450 |
| chr15 | 25539550 | 25539650 | 1065-Lng-B-T | 64   | chr15:25539550-25539650 |
| chr15 | 25547550 | 25547650 | 901-Lng-C-T  | 68   | chr15:25547550-25547650 |
| chr15 | 25558950 | 25559050 | 846-Lng-A-T  | 79   | chr15:25558950-25559050 |
| chr15 | 25581450 | 25581550 | 901-Lng-C-T  | 36   | chr15:25581450-25581550 |
| chr15 | 25589450 | 25589550 | 1072-Lng-A-T | 62   | chr15:25589450-25589550 |
| chr15 | 25589550 | 25589650 | 901-Lng-A-T  | 82   | chr15:25589550-25589650 |
| chr15 | 25608950 | 25609050 | 1065-Lng-A-T | 115  | chr15:25608950-25609050 |
| chr15 | 25609750 | 25609850 | 1152-Lng-A-T | 60   | chr15:25609750-25609850 |
| chr15 | 25626750 | 25626850 | 901-Lng-C-T  | 36   | chr15:25626750-25626850 |
| chr15 | 25640550 | 25640650 | 1004-Lng-A-T | 129  | chr15:25640550-25640650 |
| chr15 | 25641150 | 25641250 | 901-Lng-D-T  | 221  | chr15:25641150-25641250 |
| chr15 | 25645050 | 25645150 | 1065-Lng-A-T | 42   | chr15:25645050-25645150 |
| chr15 | 25654450 | 25654550 | 901-Lng-A-T  | 174  | chr15:25654450-25654550 |
| chr15 | 25654550 | 25654650 | 1090-Lng-B-T | 541  | chr15:25654550-25654650 |
| chr15 | 25655350 | 25655450 | 1100-Lng-A-T | 112  | chr15:25655350-25655450 |
| chr15 | 25661150 | 25661250 | 1065-Lng-B-T | 54   | chr15:25661150-25661250 |
| chr15 | 25697650 | 25697750 | 1065-Lng-A-T | 287  | chr15:25697650-25697750 |
| chr15 | 25713050 | 25713150 | 1065-Lng-A-T | 38   | chr15:25713050-25713150 |
| chr15 | 25721450 | 25721550 | 1004-Lng-A-T | 623  | chr15:25721450-25721550 |
| chr15 | 25724350 | 25724450 | 1167-Lng-A-T | 116  | chr15:25724350-25724450 |
| chr15 | 25728750 | 25728850 | 1065-Lng-C-T | 761  | chr15:25728750-25728850 |
| chr15 | 25739050 | 25739150 | 1167-Lng-A-T | 48   | chr15:25739050-25739150 |
| chr15 | 25741250 | 25741350 | 1072-Lng-A-T | 70   | chr15:25741250-25741350 |
| chr15 | 25746950 | 25747050 | 846-Lng-A-T  | 111  | chr15:25746950-25747050 |
| chr15 | 25751550 | 25751650 | 1274-Lng-A-T | 63   | chr15:25751550-25751650 |
| chr15 | 25759450 | 25759550 | 1065-Lng-A-T | 57   | chr15:25759450-25759550 |
| chr15 | 25768950 | 25769050 | 1004-Lng-A-T | 49   | chr15:25768950-25769050 |
| chr15 | 25790450 | 25790550 | 1004-Lng-A-T | 72   | chr15:25790450-25790550 |
| chr15 | 25795250 | 25795350 | 1223-Lng-A-T | 75   | chr15:25795250-25795350 |
| chr15 | 25804650 | 25804750 | 1072-Lng-A-T | 80   | chr15:25804650-25804750 |
| chr15 | 25823250 | 25823350 | 1167-Lng-A-T | 91   | chr15:25823250-25823350 |
| chr15 | 25828050 | 25828150 | 1065-Lng-C-T | 1010 | chr15:25828050-25828150 |
| chr15 | 25830750 | 25830850 | 1004-Lng-A-T | 59   | chr15:25830750-25830850 |
| chr15 | 25854950 | 25855050 | 901-Lng-C-T  | 73   | chr15:25854950-25855050 |
| chr15 | 25855350 | 25855450 | 1167-Lng-A-T | 61   | chr15:25855350-25855450 |

**Table S2: SB Insertion regions**

|       |          |          |              |     |                         |
|-------|----------|----------|--------------|-----|-------------------------|
| chr15 | 25859850 | 25859950 | 1004-Lng-A-T | 82  | chr15:25859850-25859950 |
| chr15 | 25861650 | 25861750 | 1167-Lng-A-T | 85  | chr15:25861650-25861750 |
| chr15 | 25862650 | 25862750 | 1223-Lng-B-T | 37  | chr15:25862650-25862750 |
| chr15 | 25872450 | 25872550 | 1223-Lng-D-T | 41  | chr15:25872450-25872550 |
| chr15 | 25886750 | 25886850 | 1065-Lng-A-T | 79  | chr15:25886750-25886850 |
| chr15 | 25896750 | 25896850 | 1167-Lng-A-T | 395 | chr15:25896750-25896850 |
| chr15 | 25902750 | 25902850 | 1004-Lng-A-T | 96  | chr15:25902750-25902850 |
| chr15 | 25903950 | 25904050 | 901-Lng-A-T  | 129 | chr15:25903950-25904050 |
| chr15 | 25904550 | 25904650 | 1090-Lng-A-T | 561 | chr15:25904550-25904650 |
| chr15 | 25910750 | 25910850 | 1090-Lng-A-T | 45  | chr15:25910750-25910850 |
| chr15 | 25915750 | 25915850 | 1223-Lng-B-T | 108 | chr15:25915750-25915850 |
| chr15 | 25924250 | 25924350 | 1065-Lng-C-T | 92  | chr15:25924250-25924350 |
| chr15 | 25939050 | 25939150 | 901-Lng-A-T  | 300 | chr15:25939050-25939150 |
| chr15 | 25992250 | 25992350 | 901-Lng-C-T  | 218 | chr15:25992250-25992350 |
| chr15 | 26032750 | 26032850 | 1065-Lng-C-T | 82  | chr15:26032750-26032850 |
| chr15 | 26034550 | 26034650 | 901-Lng-B-T  | 261 | chr15:26034550-26034650 |
| chr15 | 26127750 | 26127850 | 1152-Lng-A-T | 88  | chr15:26127750-26127850 |
| chr15 | 26130550 | 26130650 | 1065-Lng-C-T | 71  | chr15:26130550-26130650 |
| chr15 | 26203150 | 26203250 | 901-Lng-A-T  | 80  | chr15:26203150-26203250 |
| chr15 | 26219350 | 26219450 | 1100-Lng-A-T | 54  | chr15:26219350-26219450 |
| chr15 | 26251550 | 26251650 | 1072-Lng-A-T | 77  | chr15:26251550-26251650 |
| chr15 | 26282450 | 26282550 | 901-Lng-A-T  | 128 | chr15:26282450-26282550 |
| chr15 | 26306950 | 26307050 | 901-Lng-A-T  | 77  | chr15:26306950-26307050 |
| chr15 | 26308650 | 26308750 | 1065-Lng-B-T | 82  | chr15:26308650-26308750 |
| chr15 | 26339050 | 26339150 | 1065-Lng-B-T | 41  | chr15:26339050-26339150 |
| chr15 | 26343150 | 26343250 | 1065-Lng-A-T | 298 | chr15:26343150-26343250 |
| chr15 | 26345050 | 26345150 | 1065-Lng-B-T | 89  | chr15:26345050-26345150 |
| chr15 | 26374350 | 26374450 | 1090-Lng-A-T | 90  | chr15:26374350-26374450 |
| chr15 | 26381150 | 26381250 | 1223-Lng-B-T | 215 | chr15:26381150-26381250 |
| chr15 | 26396750 | 26396850 | 1090-Lng-B-T | 946 | chr15:26396750-26396850 |
| chr15 | 26421650 | 26421750 | 1065-Lng-B-T | 69  | chr15:26421650-26421750 |
| chr15 | 26498550 | 26498650 | 1090-Lng-A-T | 105 | chr15:26498550-26498650 |
| chr15 | 26501050 | 26501150 | 1065-Lng-A-T | 126 | chr15:26501050-26501150 |
| chr15 | 26517050 | 26517150 | 1072-Lng-A-T | 220 | chr15:26517050-26517150 |
| chr15 | 26551550 | 26551650 | 1065-Lng-C-T | 89  | chr15:26551550-26551650 |
| chr15 | 26565950 | 26566050 | 901-Lng-A-T  | 57  | chr15:26565950-26566050 |
| chr15 | 26575150 | 26575250 | 901-Lng-C-T  | 36  | chr15:26575150-26575250 |
| chr15 | 26592350 | 26592450 | 901-Lng-A-T  | 98  | chr15:26592350-26592450 |
| chr15 | 26619350 | 26619450 | 846-Lng-A-T  | 116 | chr15:26619350-26619450 |
| chr15 | 26625750 | 26625850 | 1065-Lng-B-T | 85  | chr15:26625750-26625850 |
| chr15 | 26633250 | 26633350 | 1223-Lng-D-T | 45  | chr15:26633250-26633350 |
| chr15 | 26654250 | 26654350 | 1065-Lng-A-T | 38  | chr15:26654250-26654350 |
| chr15 | 26664850 | 26664950 | 846-Lng-A-T  | 85  | chr15:26664850-26664950 |
| chr15 | 26665950 | 26666050 | 1065-Lng-A-T | 632 | chr15:26665950-26666050 |
| chr15 | 26674250 | 26674350 | 1065-Lng-B-T | 47  | chr15:26674250-26674350 |
| chr15 | 26675050 | 26675150 | 846-Lng-A-T  | 42  | chr15:26675050-26675150 |

**Table S2: SB Insertion regions**

|       |          |          |              |      |                         |
|-------|----------|----------|--------------|------|-------------------------|
| chr15 | 26675450 | 26675550 | 1072-Lng-A-T | 67   | chr15:26675450-26675550 |
| chr15 | 26676650 | 26676750 | 901-Lng-A-T  | 98   | chr15:26676650-26676750 |
| chr15 | 26678150 | 26678250 | 1072-Lng-A-T | 69   | chr15:26678150-26678250 |
| chr15 | 26689450 | 26689550 | 1274-Lng-A-T | 59   | chr15:26689450-26689550 |
| chr15 | 26693750 | 26693850 | 901-Lng-B-T  | 74   | chr15:26693750-26693850 |
| chr15 | 26703650 | 26703750 | 1065-Lng-C-T | 1302 | chr15:26703650-26703750 |
| chr15 | 26726850 | 26726950 | 1065-Lng-C-T | 61   | chr15:26726850-26726950 |
| chr15 | 26745050 | 26745150 | 1065-Lng-A-T | 63   | chr15:26745050-26745150 |
| chr15 | 26796450 | 26796550 | 901-Lng-A-T  | 477  | chr15:26796450-26796550 |
| chr15 | 26813250 | 26813350 | 1004-Lng-A-T | 88   | chr15:26813250-26813350 |
| chr15 | 26901650 | 26901750 | 901-Lng-C-T  | 69   | chr15:26901650-26901750 |
| chr15 | 26988650 | 26988750 | 1072-Lng-A-T | 52   | chr15:26988650-26988750 |
| chr15 | 27006350 | 27006450 | 901-Lng-A-T  | 53   | chr15:27006350-27006450 |
| chr15 | 27044250 | 27044350 | 1065-Lng-C-T | 69   | chr15:27044250-27044350 |
| chr15 | 27066850 | 27066950 | 1065-Lng-B-T | 56   | chr15:27066850-27066950 |
| chr15 | 27181050 | 27181150 | 1072-Lng-A-T | 99   | chr15:27181050-27181150 |
| chr15 | 27232550 | 27232650 | 846-Lng-A-T  | 72   | chr15:27232550-27232650 |
| chr15 | 27237050 | 27237150 | 1065-Lng-B-T | 866  | chr15:27237050-27237150 |
| chr15 | 27291450 | 27291550 | 1065-Lng-C-T | 67   | chr15:27291450-27291550 |
| chr15 | 27295750 | 27295850 | 1223-Lng-D-T | 60   | chr15:27295750-27295850 |
| chr15 | 27357850 | 27357950 | 846-Lng-A-T  | 51   | chr15:27357850-27357950 |
| chr15 | 27395250 | 27395350 | 1065-Lng-B-T | 43   | chr15:27395250-27395350 |
| chr15 | 27397250 | 27397350 | 1151-Lng-A-T | 434  | chr15:27397250-27397350 |
| chr15 | 27403850 | 27403950 | 901-Lng-C-T  | 31   | chr15:27403850-27403950 |
| chr15 | 27413750 | 27413850 | 846-Lng-A-T  | 102  | chr15:27413750-27413850 |
| chr15 | 27417450 | 27417550 | 901-Lng-D-T  | 247  | chr15:27417450-27417550 |
| chr15 | 27467650 | 27467750 | 1065-Lng-B-T | 47   | chr15:27467650-27467750 |
| chr15 | 27479850 | 27479950 | 1223-Lng-D-T | 53   | chr15:27479850-27479950 |
| chr15 | 27484150 | 27484250 | 901-Lng-A-T  | 81   | chr15:27484150-27484250 |
| chr15 | 27485450 | 27485550 | 901-Lng-C-T  | 55   | chr15:27485450-27485550 |
| chr15 | 27506250 | 27506350 | 901-Lng-B-T  | 93   | chr15:27506250-27506350 |
| chr15 | 27516550 | 27516650 | 1065-Lng-A-T | 72   | chr15:27516550-27516650 |
| chr15 | 27516550 | 27516650 | 1065-Lng-C-T | 141  | chr15:27516550-27516650 |
| chr15 | 27550150 | 27550250 | 1065-Lng-B-T | 54   | chr15:27550150-27550250 |
| chr15 | 27553050 | 27553150 | 1223-Lng-D-T | 63   | chr15:27553050-27553150 |
| chr15 | 27557350 | 27557450 | 846-Lng-A-T  | 143  | chr15:27557350-27557450 |
| chr15 | 27564750 | 27564850 | 1223-Lng-D-T | 108  | chr15:27564750-27564850 |
| chr15 | 27594650 | 27594750 | 1167-Lng-A-T | 57   | chr15:27594650-27594750 |
| chr15 | 27665550 | 27665650 | 1167-Lng-A-T | 114  | chr15:27665550-27665650 |
| chr15 | 27675350 | 27675450 | 1090-Lng-A-T | 552  | chr15:27675350-27675450 |
| chr15 | 27689350 | 27689450 | 901-Lng-B-T  | 138  | chr15:27689350-27689450 |
| chr15 | 27689350 | 27689450 | 901-Lng-A-T  | 95   | chr15:27689350-27689450 |
| chr15 | 27696750 | 27696850 | 1223-Lng-A-T | 112  | chr15:27696750-27696850 |
| chr15 | 27714450 | 27714550 | 1223-Lng-C-T | 43   | chr15:27714450-27714550 |
| chr15 | 27741550 | 27741650 | 1090-Lng-B-T | 1246 | chr15:27741550-27741650 |
| chr15 | 27745550 | 27745650 | 901-Lng-D-T  | 37   | chr15:27745550-27745650 |

**Table S2: SB Insertion regions**

|       |          |          |              |     |                         |
|-------|----------|----------|--------------|-----|-------------------------|
| chr15 | 27771050 | 27771150 | 1223-Lng-A-T | 69  | chr15:27771050-27771150 |
| chr15 | 27771150 | 27771250 | 1065-Lng-A-T | 64  | chr15:27771150-27771250 |
| chr15 | 27774250 | 27774350 | 1223-Lng-B-T | 35  | chr15:27774250-27774350 |
| chr15 | 27791850 | 27791950 | 1223-Lng-A-T | 79  | chr15:27791850-27791950 |
| chr15 | 27798150 | 27798250 | 1223-Lng-C-T | 52  | chr15:27798150-27798250 |
| chr15 | 27816950 | 27817050 | 1090-Lng-A-T | 81  | chr15:27816950-27817050 |
| chr15 | 27829050 | 27829150 | 846-Lng-A-T  | 96  | chr15:27829050-27829150 |
| chr15 | 27849850 | 27849950 | 901-Lng-B-T  | 66  | chr15:27849850-27849950 |
| chr15 | 27859350 | 27859450 | 1167-Lng-A-T | 130 | chr15:27859350-27859450 |
| chr15 | 27859650 | 27859750 | 1223-Lng-D-T | 43  | chr15:27859650-27859750 |
| chr15 | 27859850 | 27859950 | 901-Lng-A-T  | 62  | chr15:27859850-27859950 |
| chr15 | 27879550 | 27879650 | 901-Lng-A-T  | 136 | chr15:27879550-27879650 |
| chr15 | 27881750 | 27881850 | 1065-Lng-B-T | 80  | chr15:27881750-27881850 |
| chr15 | 27883250 | 27883350 | 1065-Lng-A-T | 60  | chr15:27883250-27883350 |
| chr15 | 27883250 | 27883350 | 1167-Lng-A-T | 52  | chr15:27883250-27883350 |
| chr15 | 27894450 | 27894550 | 1065-Lng-B-T | 57  | chr15:27894450-27894550 |
| chr15 | 27903550 | 27903650 | 1151-Lng-A-T | 76  | chr15:27903550-27903650 |
| chr15 | 27911450 | 27911550 | 846-Lng-A-T  | 75  | chr15:27911450-27911550 |
| chr15 | 27911950 | 27912050 | 1072-Lng-A-T | 48  | chr15:27911950-27912050 |
| chr15 | 27916050 | 27916150 | 1065-Lng-B-T | 82  | chr15:27916050-27916150 |
| chr15 | 27928450 | 27928550 | 1004-Lng-A-T | 374 | chr15:27928450-27928550 |
| chr15 | 27936050 | 27936150 | 901-Lng-A-T  | 69  | chr15:27936050-27936150 |
| chr15 | 27945350 | 27945450 | 901-Lng-D-T  | 205 | chr15:27945350-27945450 |
| chr15 | 27955950 | 27956050 | 1167-Lng-A-T | 75  | chr15:27955950-27956050 |
| chr15 | 28099450 | 28099550 | 901-Lng-C-T  | 96  | chr15:28099450-28099550 |
| chr15 | 28103250 | 28103350 | 1090-Lng-A-T | 56  | chr15:28103250-28103350 |
| chr15 | 28230050 | 28230150 | 1065-Lng-B-T | 115 | chr15:28230050-28230150 |
| chr15 | 28236750 | 28236850 | 1223-Lng-A-T | 110 | chr15:28236750-28236850 |
| chr15 | 28288650 | 28288750 | 901-Lng-A-T  | 131 | chr15:28288650-28288750 |
| chr15 | 28291450 | 28291550 | 1223-Lng-A-T | 63  | chr15:28291450-28291550 |
| chr15 | 28318750 | 28318850 | 1090-Lng-A-T | 54  | chr15:28318750-28318850 |
| chr15 | 28325750 | 28325850 | 846-Lng-A-T  | 91  | chr15:28325750-28325850 |
| chr15 | 28329150 | 28329250 | 1090-Lng-B-T | 137 | chr15:28329150-28329250 |
| chr15 | 28347050 | 28347150 | 846-Lng-A-T  | 134 | chr15:28347050-28347150 |
| chr15 | 28404450 | 28404550 | 1065-Lng-B-T | 78  | chr15:28404450-28404550 |
| chr15 | 28421850 | 28421950 | 1004-Lng-A-T | 60  | chr15:28421850-28421950 |
| chr15 | 28423950 | 28424050 | 1065-Lng-B-T | 42  | chr15:28423950-28424050 |
| chr15 | 28429350 | 28429450 | 1065-Lng-A-T | 481 | chr15:28429350-28429450 |
| chr15 | 28514450 | 28514550 | 1090-Lng-B-T | 110 | chr15:28514450-28514550 |
| chr15 | 28529250 | 28529350 | 901-Lng-A-T  | 68  | chr15:28529250-28529350 |
| chr15 | 28543950 | 28544050 | 1065-Lng-B-T | 58  | chr15:28543950-28544050 |
| chr15 | 28565550 | 28565650 | 1065-Lng-A-T | 92  | chr15:28565550-28565650 |
| chr15 | 28570750 | 28570850 | 1065-Lng-A-T | 69  | chr15:28570750-28570850 |
| chr15 | 28606650 | 28606750 | 1065-Lng-A-T | 72  | chr15:28606650-28606750 |
| chr15 | 28620950 | 28621050 | 1065-Lng-C-T | 81  | chr15:28620950-28621050 |
| chr15 | 28625250 | 28625350 | 1090-Lng-A-T | 67  | chr15:28625250-28625350 |



**Table S2: SB Insertion regions**

|       |          |          |              |     |                         |
|-------|----------|----------|--------------|-----|-------------------------|
| chr15 | 28659050 | 28659150 | 1072-Lng-A-T | 157 | chr15:28659050-28659150 |
| chr15 | 28663450 | 28663550 | 1072-Lng-A-T | 222 | chr15:28663450-28663550 |
| chr15 | 28666750 | 28666850 | 846-Lng-A-T  | 70  | chr15:28666750-28666850 |
| chr15 | 28668550 | 28668650 | 1065-Lng-A-T | 45  | chr15:28668550-28668650 |
| chr15 | 28696950 | 28697050 | 901-Lng-D-T  | 63  | chr15:28696950-28697050 |
| chr15 | 28728450 | 28728550 | 1004-Lng-A-T | 62  | chr15:28728450-28728550 |
| chr15 | 28796250 | 28796350 | 901-Lng-A-T  | 65  | chr15:28796250-28796350 |
| chr15 | 28817850 | 28817950 | 901-Lng-C-T  | 45  | chr15:28817850-28817950 |
| chr15 | 28824350 | 28824450 | 1065-Lng-B-T | 58  | chr15:28824350-28824450 |
| chr15 | 28844050 | 28844150 | 1090-Lng-A-T | 83  | chr15:28844050-28844150 |
| chr15 | 28856750 | 28856850 | 1004-Lng-A-T | 152 | chr15:28856750-28856850 |
| chr15 | 28856750 | 28856850 | 1004-Lng-A-T | 62  | chr15:28856750-28856850 |
| chr15 | 28876050 | 28876150 | 1065-Lng-A-T | 61  | chr15:28876050-28876150 |
| chr15 | 28877250 | 28877350 | 901-Lng-A-T  | 96  | chr15:28877250-28877350 |
| chr15 | 28903950 | 28904050 | 1065-Lng-B-T | 48  | chr15:28903950-28904050 |
| chr15 | 28910750 | 28910850 | 1072-Lng-A-T | 481 | chr15:28910750-28910850 |
| chr15 | 28972150 | 28972250 | 1065-Lng-A-T | 57  | chr15:28972150-28972250 |
| chr15 | 28983550 | 28983650 | 846-Lng-A-T  | 84  | chr15:28983550-28983650 |
| chr15 | 29028950 | 29029050 | 1004-Lng-A-T | 118 | chr15:29028950-29029050 |
| chr15 | 29076550 | 29076650 | 1090-Lng-A-T | 93  | chr15:29076550-29076650 |
| chr15 | 29084750 | 29084850 | 901-Lng-A-T  | 118 | chr15:29084750-29084850 |
| chr15 | 29086150 | 29086250 | 1090-Lng-B-T | 70  | chr15:29086150-29086250 |
| chr15 | 29102750 | 29102850 | 901-Lng-B-T  | 810 | chr15:29102750-29102850 |
| chr15 | 29129450 | 29129550 | 1072-Lng-A-T | 67  | chr15:29129450-29129550 |
| chr15 | 29177750 | 29177850 | 1152-Lng-A-T | 37  | chr15:29177750-29177850 |
| chr15 | 29194050 | 29194150 | 1072-Lng-A-T | 55  | chr15:29194050-29194150 |
| chr15 | 29263650 | 29263750 | 1065-Lng-B-T | 52  | chr15:29263650-29263750 |
| chr15 | 29267550 | 29267650 | 1223-Lng-A-T | 873 | chr15:29267550-29267650 |
| chr15 | 29273750 | 29273850 | 1090-Lng-B-T | 79  | chr15:29273750-29273850 |
| chr15 | 29285850 | 29285950 | 1072-Lng-A-T | 54  | chr15:29285850-29285950 |
| chr15 | 29295450 | 29295550 | 1065-Lng-B-T | 64  | chr15:29295450-29295550 |
| chr15 | 29303450 | 29303550 | 1065-Lng-C-T | 238 | chr15:29303450-29303550 |
| chr15 | 29317050 | 29317150 | 901-Lng-B-T  | 138 | chr15:29317050-29317150 |
| chr15 | 29330550 | 29330650 | 1072-Lng-A-T | 54  | chr15:29330550-29330650 |
| chr15 | 29365150 | 29365250 | 846-Lng-A-T  | 49  | chr15:29365150-29365250 |
| chr15 | 29379650 | 29379750 | 901-Lng-D-T  | 81  | chr15:29379650-29379750 |
| chr15 | 29388250 | 29388350 | 1223-Lng-B-T | 38  | chr15:29388250-29388350 |
| chr15 | 29417850 | 29417950 | 1090-Lng-A-T | 115 | chr15:29417850-29417950 |
| chr15 | 29424950 | 29425050 | 901-Lng-A-T  | 138 | chr15:29424950-29425050 |
| chr15 | 29448550 | 29448650 | 1065-Lng-A-T | 96  | chr15:29448550-29448650 |
| chr15 | 29461550 | 29461650 | 1223-Lng-B-T | 94  | chr15:29461550-29461650 |
| chr15 | 29503150 | 29503250 | 1072-Lng-A-T | 108 | chr15:29503150-29503250 |
| chr15 | 29503450 | 29503550 | 901-Lng-C-T  | 90  | chr15:29503450-29503550 |
| chr15 | 29602550 | 29602650 | 1090-Lng-B-T | 300 | chr15:29602550-29602650 |
| chr15 | 29640550 | 29640650 | 901-Lng-B-T  | 36  | chr15:29640550-29640650 |
| chr15 | 29847650 | 29847750 | 1065-Lng-A-T | 208 | chr15:29847650-29847750 |

**Table S2: SB Insertion regions**

|       |          |          |              |     |                         |
|-------|----------|----------|--------------|-----|-------------------------|
| chr15 | 29943450 | 29943550 | 1223-Lng-B-T | 45  | chr15:29943450-29943550 |
| chr15 | 29946150 | 29946250 | 1090-Lng-B-T | 557 | chr15:29946150-29946250 |
| chr15 | 29947650 | 29947750 | 901-Lng-A-T  | 126 | chr15:29947650-29947750 |
| chr15 | 29949350 | 29949450 | 1167-Lng-A-T | 995 | chr15:29949350-29949450 |
| chr15 | 29956550 | 29956650 | 1100-Lng-A-T | 80  | chr15:29956550-29956650 |
| chr15 | 29986950 | 29987050 | 1065-Lng-B-T | 40  | chr15:29986950-29987050 |
| chr15 | 30065850 | 30065950 | 1072-Lng-A-T | 59  | chr15:30065850-30065950 |
| chr15 | 30083250 | 30083350 | 1090-Lng-B-T | 179 | chr15:30083250-30083350 |
| chr15 | 30100650 | 30100750 | 901-Lng-C-T  | 77  | chr15:30100650-30100750 |
| chr15 | 30132350 | 30132450 | 901-Lng-C-T  | 54  | chr15:30132350-30132450 |
| chr15 | 30132350 | 30132450 | 901-Lng-D-T  | 51  | chr15:30132350-30132450 |
| chr15 | 30138750 | 30138850 | 1152-Lng-A-T | 317 | chr15:30138750-30138850 |
| chr15 | 30146150 | 30146250 | 1065-Lng-C-T | 80  | chr15:30146150-30146250 |
| chr15 | 30156250 | 30156350 | 1223-Lng-D-T | 41  | chr15:30156250-30156350 |
| chr15 | 30160150 | 30160250 | 1072-Lng-A-T | 64  | chr15:30160150-30160250 |
| chr15 | 30174550 | 30174650 | 901-Lng-D-T  | 204 | chr15:30174550-30174650 |
| chr15 | 30188250 | 30188350 | 901-Lng-A-T  | 71  | chr15:30188250-30188350 |
| chr15 | 30194350 | 30194450 | 1065-Lng-A-T | 65  | chr15:30194350-30194450 |
| chr15 | 30197350 | 30197450 | 901-Lng-B-T  | 57  | chr15:30197350-30197450 |
| chr15 | 30200850 | 30200950 | 1065-Lng-B-T | 93  | chr15:30200850-30200950 |
| chr15 | 30220150 | 30220250 | 1065-Lng-A-T | 49  | chr15:30220150-30220250 |
| chr15 | 30225550 | 30225650 | 1004-Lng-A-T | 156 | chr15:30225550-30225650 |
| chr15 | 30237250 | 30237350 | 1223-Lng-A-T | 179 | chr15:30237250-30237350 |
| chr15 | 30252250 | 30252350 | 1065-Lng-B-T | 510 | chr15:30252250-30252350 |
| chr15 | 30259950 | 30260050 | 1065-Lng-B-T | 85  | chr15:30259950-30260050 |
| chr15 | 30300750 | 30300850 | 901-Lng-B-T  | 80  | chr15:30300750-30300850 |
| chr15 | 30306650 | 30306750 | 901-Lng-D-T  | 188 | chr15:30306650-30306750 |
| chr15 | 30331750 | 30331850 | 1065-Lng-B-T | 84  | chr15:30331750-30331850 |
| chr15 | 30345050 | 30345150 | 1065-Lng-C-T | 88  | chr15:30345050-30345150 |
| chr15 | 30384150 | 30384250 | 901-Lng-D-T  | 128 | chr15:30384150-30384250 |
| chr15 | 30419150 | 30419250 | 901-Lng-C-T  | 33  | chr15:30419150-30419250 |
| chr15 | 30425150 | 30425250 | 1065-Lng-B-T | 41  | chr15:30425150-30425250 |
| chr15 | 30434250 | 30434350 | 1223-Lng-A-T | 198 | chr15:30434250-30434350 |
| chr15 | 30467050 | 30467150 | 846-Lng-A-T  | 120 | chr15:30467050-30467150 |
| chr15 | 30477950 | 30478050 | 1004-Lng-A-T | 49  | chr15:30477950-30478050 |
| chr15 | 30482550 | 30482650 | 846-Lng-A-T  | 55  | chr15:30482550-30482650 |
| chr15 | 30518050 | 30518150 | 1065-Lng-A-T | 37  | chr15:30518050-30518150 |
| chr15 | 30536850 | 30536950 | 1090-Lng-A-T | 56  | chr15:30536850-30536950 |
| chr15 | 30553550 | 30553650 | 901-Lng-C-T  | 155 | chr15:30553550-30553650 |
| chr15 | 30554550 | 30554650 | 1065-Lng-B-T | 47  | chr15:30554550-30554650 |
| chr15 | 30563750 | 30563850 | 1090-Lng-A-T | 108 | chr15:30563750-30563850 |
| chr15 | 30581250 | 30581350 | 1004-Lng-A-T | 57  | chr15:30581250-30581350 |
| chr15 | 30606250 | 30606350 | 901-Lng-D-T  | 181 | chr15:30606250-30606350 |
| chr15 | 30607150 | 30607250 | 901-Lng-C-T  | 267 | chr15:30607150-30607250 |
| chr15 | 30610650 | 30610750 | 1090-Lng-A-T | 44  | chr15:30610650-30610750 |
| chr15 | 30611950 | 30612050 | 1065-Lng-A-T | 488 | chr15:30611950-30612050 |

**Table S2: SB Insertion regions**

|       |          |          |              |      |                         |
|-------|----------|----------|--------------|------|-------------------------|
| chr15 | 30643050 | 30643150 | 1223-Lng-D-T | 48   | chr15:30643050-30643150 |
| chr15 | 30646550 | 30646650 | 1065-Lng-B-T | 61   | chr15:30646550-30646650 |
| chr15 | 30653750 | 30653850 | 1223-Lng-D-T | 41   | chr15:30653750-30653850 |
| chr15 | 30667350 | 30667450 | 901-Lng-C-T  | 54   | chr15:30667350-30667450 |
| chr15 | 30685250 | 30685350 | 901-Lng-A-T  | 83   | chr15:30685250-30685350 |
| chr15 | 30710550 | 30710650 | 901-Lng-A-T  | 231  | chr15:30710550-30710650 |
| chr15 | 30724850 | 30724950 | 1065-Lng-B-T | 90   | chr15:30724850-30724950 |
| chr15 | 30737950 | 30738050 | 1065-Lng-A-T | 86   | chr15:30737950-30738050 |
| chr15 | 30738050 | 30738150 | 1065-Lng-A-T | 103  | chr15:30738050-30738150 |
| chr15 | 30748450 | 30748550 | 901-Lng-D-T  | 166  | chr15:30748450-30748550 |
| chr15 | 30777450 | 30777550 | 1065-Lng-B-T | 46   | chr15:30777450-30777550 |
| chr15 | 30800750 | 30800850 | 1065-Lng-B-T | 47   | chr15:30800750-30800850 |
| chr15 | 30813650 | 30813750 | 1065-Lng-A-T | 49   | chr15:30813650-30813750 |
| chr15 | 30833850 | 30833950 | 1090-Lng-A-T | 166  | chr15:30833850-30833950 |
| chr15 | 30834750 | 30834850 | 1090-Lng-A-T | 98   | chr15:30834750-30834850 |
| chr15 | 30851750 | 30851850 | 901-Lng-B-T  | 82   | chr15:30851750-30851850 |
| chr15 | 30871150 | 30871250 | 1072-Lng-A-T | 146  | chr15:30871150-30871250 |
| chr15 | 30889550 | 30889650 | 1065-Lng-B-T | 81   | chr15:30889550-30889650 |
| chr15 | 31045950 | 31046050 | 901-Lng-C-T  | 377  | chr15:31045950-31046050 |
| chr15 | 31161650 | 31161750 | 1065-Lng-A-T | 49   | chr15:31161650-31161750 |
| chr15 | 31167250 | 31167350 | 1065-Lng-B-T | 51   | chr15:31167250-31167350 |
| chr15 | 31181150 | 31181250 | 901-Lng-A-T  | 84   | chr15:31181150-31181250 |
| chr15 | 31191150 | 31191250 | 1274-Lng-A-T | 52   | chr15:31191150-31191250 |
| chr15 | 31192250 | 31192350 | 1223-Lng-A-T | 1477 | chr15:31192250-31192350 |
| chr15 | 31199850 | 31199950 | 1004-Lng-A-T | 146  | chr15:31199850-31199950 |
| chr15 | 31222950 | 31223050 | 1223-Lng-A-T | 96   | chr15:31222950-31223050 |
| chr15 | 31231050 | 31231150 | 1274-Lng-A-T | 63   | chr15:31231050-31231150 |
| chr15 | 31232550 | 31232650 | 1072-Lng-A-T | 50   | chr15:31232550-31232650 |
| chr15 | 31244750 | 31244850 | 1090-Lng-B-T | 193  | chr15:31244750-31244850 |
| chr15 | 31269850 | 31269950 | 1072-Lng-A-T | 50   | chr15:31269850-31269950 |
| chr15 | 31299650 | 31299750 | 1004-Lng-A-T | 60   | chr15:31299650-31299750 |
| chr15 | 31311650 | 31311750 | 1072-Lng-A-T | 140  | chr15:31311650-31311750 |
| chr15 | 31354750 | 31354850 | 1065-Lng-B-T | 67   | chr15:31354750-31354850 |
| chr15 | 31385850 | 31385950 | 1167-Lng-A-T | 48   | chr15:31385850-31385950 |
| chr15 | 31405550 | 31405650 | 1223-Lng-C-T | 50   | chr15:31405550-31405650 |
| chr15 | 31415450 | 31415550 | 1223-Lng-C-T | 47   | chr15:31415450-31415550 |
| chr15 | 31427350 | 31427450 | 1100-Lng-A-T | 51   | chr15:31427350-31427450 |
| chr15 | 31441250 | 31441350 | 1223-Lng-A-T | 74   | chr15:31441250-31441350 |
| chr15 | 31443950 | 31444050 | 1223-Lng-D-T | 78   | chr15:31443950-31444050 |
| chr15 | 31445850 | 31445950 | 1152-Lng-A-T | 78   | chr15:31445850-31445950 |
| chr15 | 31451550 | 31451650 | 901-Lng-A-T  | 54   | chr15:31451550-31451650 |
| chr15 | 31452050 | 31452150 | 1274-Lng-A-T | 220  | chr15:31452050-31452150 |
| chr15 | 31452250 | 31452350 | 1223-Lng-A-T | 1404 | chr15:31452250-31452350 |
| chr15 | 31454750 | 31454850 | 1223-Lng-D-T | 68   | chr15:31454750-31454850 |
| chr15 | 31455050 | 31455150 | 901-Lng-B-T  | 96   | chr15:31455050-31455150 |
| chr15 | 31459550 | 31459650 | 1072-Lng-A-T | 159  | chr15:31459550-31459650 |

**Table S2: SB Insertion regions**

|       |          |          |              |     |                         |
|-------|----------|----------|--------------|-----|-------------------------|
| chr15 | 31475050 | 31475150 | 1072-Lng-A-T | 72  | chr15:31475050-31475150 |
| chr15 | 31478150 | 31478250 | 1065-Lng-A-T | 75  | chr15:31478150-31478250 |
| chr15 | 31508850 | 31508950 | 1065-Lng-A-T | 666 | chr15:31508850-31508950 |
| chr15 | 31518450 | 31518550 | 901-Lng-B-T  | 150 | chr15:31518450-31518550 |
| chr15 | 31524450 | 31524550 | 901-Lng-C-T  | 85  | chr15:31524450-31524550 |
| chr15 | 31526250 | 31526350 | 1065-Lng-B-T | 42  | chr15:31526250-31526350 |
| chr15 | 31532650 | 31532750 | 1090-Lng-A-T | 67  | chr15:31532650-31532750 |
| chr15 | 31536350 | 31536450 | 1065-Lng-A-T | 52  | chr15:31536350-31536450 |
| chr15 | 31536550 | 31536650 | 901-Lng-A-T  | 70  | chr15:31536550-31536650 |
| chr15 | 31585550 | 31585650 | 1223-Lng-B-T | 158 | chr15:31585550-31585650 |
| chr15 | 31605750 | 31605850 | 846-Lng-A-T  | 46  | chr15:31605750-31605850 |
| chr15 | 31700350 | 31700450 | 1090-Lng-A-T | 115 | chr15:31700350-31700450 |
| chr15 | 31704550 | 31704650 | 1065-Lng-B-T | 63  | chr15:31704550-31704650 |
| chr15 | 31791550 | 31791650 | 1004-Lng-A-T | 66  | chr15:31791550-31791650 |
| chr15 | 31795450 | 31795550 | 901-Lng-A-T  | 91  | chr15:31795450-31795550 |
| chr15 | 31797350 | 31797450 | 901-Lng-C-T  | 178 | chr15:31797350-31797450 |
| chr15 | 31799150 | 31799250 | 1065-Lng-B-T | 39  | chr15:31799150-31799250 |
| chr15 | 31851850 | 31851950 | 1090-Lng-A-T | 97  | chr15:31851850-31851950 |
| chr15 | 31870050 | 31870150 | 1065-Lng-C-T | 66  | chr15:31870050-31870150 |
| chr15 | 31903150 | 31903250 | 1090-Lng-B-T | 421 | chr15:31903150-31903250 |
| chr15 | 31944650 | 31944750 | 1090-Lng-A-T | 115 | chr15:31944650-31944750 |
| chr15 | 31984550 | 31984650 | 1065-Lng-B-T | 72  | chr15:31984550-31984650 |
| chr15 | 31985450 | 31985550 | 901-Lng-A-T  | 288 | chr15:31985450-31985550 |
| chr15 | 32004450 | 32004550 | 1004-Lng-A-T | 85  | chr15:32004450-32004550 |
| chr15 | 32033650 | 32033750 | 1167-Lng-A-T | 169 | chr15:32033650-32033750 |
| chr15 | 32052350 | 32052450 | 1223-Lng-C-T | 50  | chr15:32052350-32052450 |
| chr15 | 32060950 | 32061050 | 1090-Lng-A-T | 393 | chr15:32060950-32061050 |
| chr15 | 32069450 | 32069550 | 846-Lng-A-T  | 142 | chr15:32069450-32069550 |
| chr15 | 32071150 | 32071250 | 1223-Lng-B-T | 42  | chr15:32071150-32071250 |
| chr15 | 32078250 | 32078350 | 1065-Lng-B-T | 82  | chr15:32078250-32078350 |
| chr15 | 32108250 | 32108350 | 846-Lng-A-T  | 112 | chr15:32108250-32108350 |
| chr15 | 32126350 | 32126450 | 846-Lng-A-T  | 113 | chr15:32126350-32126450 |
| chr15 | 32152450 | 32152550 | 1065-Lng-A-T | 93  | chr15:32152450-32152550 |
| chr15 | 32190950 | 32191050 | 1072-Lng-A-T | 202 | chr15:32190950-32191050 |
| chr15 | 32201150 | 32201250 | 1223-Lng-A-T | 293 | chr15:32201150-32201250 |
| chr15 | 32204250 | 32204350 | 1004-Lng-A-T | 83  | chr15:32204250-32204350 |
| chr15 | 32217050 | 32217150 | 901-Lng-A-T  | 395 | chr15:32217050-32217150 |
| chr15 | 32219650 | 32219750 | 901-Lng-C-T  | 55  | chr15:32219650-32219750 |
| chr15 | 32220350 | 32220450 | 901-Lng-A-T  | 78  | chr15:32220350-32220450 |
| chr15 | 32224350 | 32224450 | 901-Lng-D-T  | 350 | chr15:32224350-32224450 |
| chr15 | 32253450 | 32253550 | 1065-Lng-B-T | 50  | chr15:32253450-32253550 |
| chr15 | 32337950 | 32338050 | 901-Lng-B-T  | 119 | chr15:32337950-32338050 |
| chr15 | 32399950 | 32400050 | 901-Lng-D-T  | 41  | chr15:32399950-32400050 |
| chr15 | 32412050 | 32412150 | 901-Lng-B-T  | 718 | chr15:32412050-32412150 |
| chr15 | 32417950 | 32418050 | 1065-Lng-B-T | 85  | chr15:32417950-32418050 |
| chr15 | 32417950 | 32418050 | 1004-Lng-A-T | 61  | chr15:32417950-32418050 |

**Table S2: SB Insertion regions**

|       |          |          |              |     |                         |
|-------|----------|----------|--------------|-----|-------------------------|
| chr15 | 32426850 | 32426950 | 1223-Lng-C-T | 72  | chr15:32426850-32426950 |
| chr15 | 32453450 | 32453550 | 901-Lng-C-T  | 103 | chr15:32453450-32453550 |
| chr15 | 32466650 | 32466750 | 1223-Lng-A-T | 87  | chr15:32466650-32466750 |
| chr15 | 32469750 | 32469850 | 1223-Lng-B-T | 91  | chr15:32469750-32469850 |
| chr15 | 32526650 | 32526750 | 1065-Lng-A-T | 85  | chr15:32526650-32526750 |
| chr15 | 32537750 | 32537850 | 1223-Lng-B-T | 40  | chr15:32537750-32537850 |
| chr15 | 32545850 | 32545950 | 1090-Lng-A-T | 118 | chr15:32545850-32545950 |
| chr15 | 32552450 | 32552550 | 901-Lng-C-T  | 61  | chr15:32552450-32552550 |
| chr15 | 32564950 | 32565050 | 901-Lng-C-T  | 45  | chr15:32564950-32565050 |
| chr15 | 32571150 | 32571250 | 1223-Lng-C-T | 66  | chr15:32571150-32571250 |
| chr15 | 32631550 | 32631650 | 1167-Lng-A-T | 141 | chr15:32631550-32631650 |
| chr15 | 32664550 | 32664650 | 1004-Lng-A-T | 85  | chr15:32664550-32664650 |
| chr15 | 32678250 | 32678350 | 1090-Lng-A-T | 321 | chr15:32678250-32678350 |
| chr15 | 32687050 | 32687150 | 1274-Lng-A-T | 97  | chr15:32687050-32687150 |
| chr15 | 32702050 | 32702150 | 1065-Lng-B-T | 52  | chr15:32702050-32702150 |
| chr15 | 32704450 | 32704550 | 1223-Lng-B-T | 197 | chr15:32704450-32704550 |
| chr15 | 32707450 | 32707550 | 1090-Lng-A-T | 78  | chr15:32707450-32707550 |
| chr15 | 32782750 | 32782850 | 1065-Lng-A-T | 92  | chr15:32782750-32782850 |
| chr15 | 32890850 | 32890950 | 901-Lng-C-T  | 305 | chr15:32890850-32890950 |
| chr15 | 32892350 | 32892450 | 1090-Lng-A-T | 58  | chr15:32892350-32892450 |
| chr15 | 32906250 | 32906350 | 1004-Lng-A-T | 68  | chr15:32906250-32906350 |
| chr15 | 32928050 | 32928150 | 1223-Lng-A-T | 115 | chr15:32928050-32928150 |
| chr15 | 32951950 | 32952050 | 901-Lng-D-T  | 346 | chr15:32951950-32952050 |
| chr15 | 32953050 | 32953150 | 1065-Lng-B-T | 65  | chr15:32953050-32953150 |
| chr15 | 32960750 | 32960850 | 1065-Lng-C-T | 160 | chr15:32960750-32960850 |
| chr15 | 33034350 | 33034450 | 1090-Lng-A-T | 61  | chr15:33034350-33034450 |
| chr15 | 33043950 | 33044050 | 901-Lng-C-T  | 77  | chr15:33043950-33044050 |
| chr15 | 33047650 | 33047750 | 901-Lng-A-T  | 54  | chr15:33047650-33047750 |
| chr15 | 33052050 | 33052150 | 1065-Lng-B-T | 96  | chr15:33052050-33052150 |
| chr15 | 33077350 | 33077450 | 1072-Lng-A-T | 120 | chr15:33077350-33077450 |
| chr15 | 33082450 | 33082550 | 1223-Lng-A-T | 178 | chr15:33082450-33082550 |
| chr15 | 33086250 | 33086350 | 901-Lng-C-T  | 40  | chr15:33086250-33086350 |
| chr15 | 33107750 | 33107850 | 1004-Lng-A-T | 59  | chr15:33107750-33107850 |
| chr15 | 33117050 | 33117150 | 1065-Lng-B-T | 41  | chr15:33117050-33117150 |
| chr15 | 33137450 | 33137550 | 901-Lng-A-T  | 52  | chr15:33137450-33137550 |
| chr15 | 33155550 | 33155650 | 1065-Lng-B-T | 50  | chr15:33155550-33155650 |
| chr15 | 33178550 | 33178650 | 1004-Lng-A-T | 53  | chr15:33178550-33178650 |
| chr15 | 33180750 | 33180850 | 1004-Lng-A-T | 65  | chr15:33180750-33180850 |
| chr15 | 33206050 | 33206150 | 1223-Lng-C-T | 59  | chr15:33206050-33206150 |
| chr15 | 33211050 | 33211150 | 846-Lng-A-T  | 61  | chr15:33211050-33211150 |
| chr15 | 33214850 | 33214950 | 1004-Lng-A-T | 112 | chr15:33214850-33214950 |
| chr15 | 33217550 | 33217650 | 901-Lng-C-T  | 114 | chr15:33217550-33217650 |
| chr15 | 33252450 | 33252550 | 901-Lng-C-T  | 59  | chr15:33252450-33252550 |
| chr15 | 33282250 | 33282350 | 901-Lng-D-T  | 116 | chr15:33282250-33282350 |
| chr15 | 33282350 | 33282450 | 1072-Lng-A-T | 62  | chr15:33282350-33282450 |
| chr15 | 33293350 | 33293450 | 901-Lng-B-T  | 62  | chr15:33293350-33293450 |

**Table S2: SB Insertion regions**

|       |          |          |              |      |                         |
|-------|----------|----------|--------------|------|-------------------------|
| chr15 | 33295050 | 33295150 | 901-Lng-A-T  | 63   | chr15:33295050-33295150 |
| chr15 | 33308650 | 33308750 | 1065-Lng-C-T | 74   | chr15:33308650-33308750 |
| chr15 | 33308750 | 33308850 | 901-Lng-A-T  | 224  | chr15:33308750-33308850 |
| chr15 | 33316850 | 33316950 | 1072-Lng-A-T | 50   | chr15:33316850-33316950 |
| chr15 | 33323650 | 33323750 | 1072-Lng-A-T | 209  | chr15:33323650-33323750 |
| chr15 | 33338950 | 33339050 | 1065-Lng-B-T | 82   | chr15:33338950-33339050 |
| chr15 | 33372250 | 33372350 | 1065-Lng-A-T | 43   | chr15:33372250-33372350 |
| chr15 | 33380850 | 33380950 | 1065-Lng-B-T | 66   | chr15:33380850-33380950 |
| chr15 | 33381150 | 33381250 | 1223-Lng-B-T | 329  | chr15:33381150-33381250 |
| chr15 | 33382250 | 33382350 | 1223-Lng-A-T | 211  | chr15:33382250-33382350 |
| chr15 | 33394850 | 33394950 | 1004-Lng-A-T | 52   | chr15:33394850-33394950 |
| chr15 | 33402750 | 33402850 | 846-Lng-A-T  | 90   | chr15:33402750-33402850 |
| chr15 | 33432750 | 33432850 | 1065-Lng-B-T | 84   | chr15:33432750-33432850 |
| chr15 | 33450250 | 33450350 | 1004-Lng-A-T | 236  | chr15:33450250-33450350 |
| chr15 | 33457850 | 33457950 | 1065-Lng-C-T | 77   | chr15:33457850-33457950 |
| chr15 | 33464650 | 33464750 | 1090-Lng-A-T | 91   | chr15:33464650-33464750 |
| chr15 | 33478650 | 33478750 | 1090-Lng-A-T | 69   | chr15:33478650-33478750 |
| chr15 | 33502150 | 33502250 | 1072-Lng-A-T | 93   | chr15:33502150-33502250 |
| chr15 | 33529150 | 33529250 | 1090-Lng-B-T | 808  | chr15:33529150-33529250 |
| chr15 | 33564550 | 33564650 | 901-Lng-B-T  | 332  | chr15:33564550-33564650 |
| chr15 | 33576950 | 33577050 | 1090-Lng-A-T | 47   | chr15:33576950-33577050 |
| chr15 | 33626150 | 33626250 | 1090-Lng-B-T | 802  | chr15:33626150-33626250 |
| chr15 | 33633450 | 33633550 | 1090-Lng-A-T | 85   | chr15:33633450-33633550 |
| chr15 | 33655250 | 33655350 | 1065-Lng-A-T | 131  | chr15:33655250-33655350 |
| chr15 | 33758350 | 33758450 | 1152-Lng-A-T | 392  | chr15:33758350-33758450 |
| chr15 | 33885250 | 33885350 | 1065-Lng-B-T | 59   | chr15:33885250-33885350 |
| chr15 | 34020150 | 34020250 | 1274-Lng-A-T | 68   | chr15:34020150-34020250 |
| chr15 | 34021150 | 34021250 | 1090-Lng-B-T | 1202 | chr15:34021150-34021250 |
| chr15 | 34029550 | 34029650 | 901-Lng-B-T  | 172  | chr15:34029550-34029650 |
| chr15 | 34037350 | 34037450 | 1090-Lng-A-T | 66   | chr15:34037350-34037450 |
| chr15 | 34043050 | 34043150 | 1065-Lng-A-T | 53   | chr15:34043050-34043150 |
| chr15 | 34050250 | 34050350 | 1223-Lng-B-T | 85   | chr15:34050250-34050350 |
| chr15 | 34054450 | 34054550 | 1223-Lng-A-T | 136  | chr15:34054450-34054550 |
| chr15 | 34058450 | 34058550 | 1090-Lng-A-T | 51   | chr15:34058450-34058550 |
| chr15 | 34058950 | 34059050 | 1188-Lng-A-T | 55   | chr15:34058950-34059050 |
| chr15 | 34058950 | 34059050 | 1223-Lng-B-T | 54   | chr15:34058950-34059050 |
| chr15 | 34064150 | 34064250 | 901-Lng-A-T  | 68   | chr15:34064150-34064250 |
| chr15 | 34070350 | 34070450 | 1065-Lng-B-T | 46   | chr15:34070350-34070450 |
| chr15 | 34071550 | 34071650 | 1065-Lng-C-T | 155  | chr15:34071550-34071650 |
| chr15 | 34076450 | 34076550 | 1090-Lng-A-T | 62   | chr15:34076450-34076550 |
| chr15 | 34126750 | 34126850 | 1065-Lng-B-T | 82   | chr15:34126750-34126850 |
| chr15 | 34134250 | 34134350 | 1167-Lng-A-T | 5522 | chr15:34134250-34134350 |
| chr15 | 34142150 | 34142250 | 1065-Lng-A-T | 222  | chr15:34142150-34142250 |
| chr15 | 34171850 | 34171950 | 901-Lng-C-T  | 47   | chr15:34171850-34171950 |
| chr15 | 34171850 | 34171950 | 846-Lng-A-T  | 113  | chr15:34171850-34171950 |
| chr15 | 34178050 | 34178150 | 901-Lng-C-T  | 34   | chr15:34178050-34178150 |

**Table S2: SB Insertion regions**

|       |          |          |              |     |                         |
|-------|----------|----------|--------------|-----|-------------------------|
| chr15 | 34180850 | 34180950 | 1065-Lng-A-T | 49  | chr15:34180850-34180950 |
| chr15 | 34188850 | 34188950 | 1223-Lng-B-T | 196 | chr15:34188850-34188950 |
| chr15 | 34189050 | 34189150 | 1065-Lng-B-T | 65  | chr15:34189050-34189150 |
| chr15 | 34220650 | 34220750 | 1090-Lng-A-T | 55  | chr15:34220650-34220750 |
| chr15 | 34241950 | 34242050 | 1072-Lng-A-T | 55  | chr15:34241950-34242050 |
| chr15 | 34245950 | 34246050 | 901-Lng-A-T  | 77  | chr15:34245950-34246050 |
| chr15 | 34248050 | 34248150 | 1065-Lng-B-T | 49  | chr15:34248050-34248150 |
| chr15 | 34364350 | 34364450 | 1072-Lng-A-T | 228 | chr15:34364350-34364450 |
| chr15 | 34367350 | 34367450 | 901-Lng-B-T  | 684 | chr15:34367350-34367450 |
| chr15 | 34367850 | 34367950 | 1223-Lng-A-T | 135 | chr15:34367850-34367950 |
| chr15 | 34368050 | 34368150 | 901-Lng-D-T  | 203 | chr15:34368050-34368150 |
| chr15 | 34376850 | 34376950 | 1167-Lng-A-T | 49  | chr15:34376850-34376950 |
| chr15 | 34393950 | 34394050 | 901-Lng-C-T  | 52  | chr15:34393950-34394050 |
| chr15 | 34420050 | 34420150 | 1090-Lng-A-T | 61  | chr15:34420050-34420150 |
| chr15 | 34433350 | 34433450 | 1065-Lng-B-T | 97  | chr15:34433350-34433450 |
| chr15 | 34436550 | 34436650 | 901-Lng-D-T  | 354 | chr15:34436550-34436650 |
| chr15 | 34502650 | 34502750 | 1090-Lng-A-T | 91  | chr15:34502650-34502750 |
| chr15 | 34585350 | 34585450 | 901-Lng-A-T  | 57  | chr15:34585350-34585450 |
| chr15 | 34599450 | 34599550 | 1065-Lng-B-T | 82  | chr15:34599450-34599550 |
| chr15 | 34600050 | 34600150 | 1090-Lng-A-T | 49  | chr15:34600050-34600150 |
| chr15 | 34605950 | 34606050 | 1065-Lng-B-T | 59  | chr15:34605950-34606050 |
| chr15 | 34703250 | 34703350 | 1065-Lng-B-T | 65  | chr15:34703250-34703350 |
| chr15 | 34804350 | 34804450 | 1151-Lng-A-T | 68  | chr15:34804350-34804450 |
| chr15 | 34811750 | 34811850 | 1065-Lng-A-T | 50  | chr15:34811750-34811850 |
| chr15 | 34834050 | 34834150 | 1223-Lng-D-T | 42  | chr15:34834050-34834150 |
| chr15 | 34839050 | 34839150 | 1151-Lng-A-T | 262 | chr15:34839050-34839150 |
| chr15 | 34852050 | 34852150 | 1065-Lng-A-T | 64  | chr15:34852050-34852150 |
| chr15 | 34853150 | 34853250 | 1090-Lng-A-T | 46  | chr15:34853150-34853250 |
| chr15 | 34853750 | 34853850 | 1065-Lng-B-T | 48  | chr15:34853750-34853850 |
| chr15 | 34874650 | 34874750 | 846-Lng-A-T  | 57  | chr15:34874650-34874750 |
| chr15 | 34875250 | 34875350 | 1090-Lng-A-T | 134 | chr15:34875250-34875350 |
| chr15 | 34879650 | 34879750 | 1065-Lng-A-T | 38  | chr15:34879650-34879750 |
| chr15 | 34898450 | 34898550 | 1004-Lng-A-T | 466 | chr15:34898450-34898550 |
| chr15 | 34925550 | 34925650 | 1065-Lng-C-T | 66  | chr15:34925550-34925650 |
| chr15 | 34938650 | 34938750 | 901-Lng-B-T  | 213 | chr15:34938650-34938750 |
| chr15 | 34961450 | 34961550 | 846-Lng-A-T  | 150 | chr15:34961450-34961550 |
| chr15 | 34991550 | 34991650 | 1223-Lng-B-T | 67  | chr15:34991550-34991650 |
| chr15 | 35010850 | 35010950 | 901-Lng-A-T  | 68  | chr15:35010850-35010950 |
| chr15 | 35014850 | 35014950 | 1065-Lng-B-T | 46  | chr15:35014850-35014950 |
| chr15 | 35028850 | 35028950 | 1223-Lng-D-T | 55  | chr15:35028850-35028950 |
| chr15 | 35029850 | 35029950 | 1065-Lng-A-T | 78  | chr15:35029850-35029950 |
| chr15 | 35060050 | 35060150 | 1090-Lng-A-T | 44  | chr15:35060050-35060150 |
| chr15 | 35071450 | 35071550 | 1072-Lng-A-T | 53  | chr15:35071450-35071550 |
| chr15 | 35166250 | 35166350 | 1223-Lng-D-T | 43  | chr15:35166250-35166350 |
| chr15 | 35177150 | 35177250 | 1065-Lng-A-T | 77  | chr15:35177150-35177250 |
| chr15 | 35177150 | 35177250 | 901-Lng-D-T  | 255 | chr15:35177150-35177250 |

**Table S2: SB Insertion regions**

|       |          |          |              |      |                         |
|-------|----------|----------|--------------|------|-------------------------|
| chr15 | 35187750 | 35187850 | 1065-Lng-A-T | 86   | chr15:35187750-35187850 |
| chr15 | 35262150 | 35262250 | 901-Lng-C-T  | 28   | chr15:35262150-35262250 |
| chr15 | 35281150 | 35281250 | 1065-Lng-B-T | 47   | chr15:35281150-35281250 |
| chr15 | 35315150 | 35315250 | 1065-Lng-B-T | 85   | chr15:35315150-35315250 |
| chr15 | 35320350 | 35320450 | 1065-Lng-B-T | 117  | chr15:35320350-35320450 |
| chr15 | 35330450 | 35330550 | 1151-Lng-A-T | 346  | chr15:35330450-35330550 |
| chr15 | 35331650 | 35331750 | 1223-Lng-C-T | 1199 | chr15:35331650-35331750 |
| chr15 | 35333850 | 35333950 | 901-Lng-A-T  | 79   | chr15:35333850-35333950 |
| chr15 | 35334850 | 35334950 | 1274-Lng-A-T | 249  | chr15:35334850-35334950 |
| chr15 | 35335450 | 35335550 | 1223-Lng-C-T | 60   | chr15:35335450-35335550 |
| chr15 | 35347650 | 35347750 | 1072-Lng-A-T | 52   | chr15:35347650-35347750 |
| chr15 | 35350750 | 35350850 | 1090-Lng-A-T | 50   | chr15:35350750-35350850 |
| chr15 | 35351650 | 35351750 | 901-Lng-D-T  | 194  | chr15:35351650-35351750 |
| chr15 | 35375050 | 35375150 | 1065-Lng-B-T | 114  | chr15:35375050-35375150 |
| chr15 | 35418250 | 35418350 | 1223-Lng-A-T | 141  | chr15:35418250-35418350 |
| chr15 | 35450550 | 35450650 | 1223-Lng-B-T | 52   | chr15:35450550-35450650 |
| chr15 | 35452650 | 35452750 | 1223-Lng-B-T | 83   | chr15:35452650-35452750 |
| chr15 | 35473850 | 35473950 | 901-Lng-A-T  | 103  | chr15:35473850-35473950 |
| chr15 | 35495950 | 35496050 | 1065-Lng-B-T | 43   | chr15:35495950-35496050 |
| chr15 | 35507550 | 35507650 | 1004-Lng-A-T | 80   | chr15:35507550-35507650 |
| chr15 | 35537950 | 35538050 | 901-Lng-B-T  | 471  | chr15:35537950-35538050 |
| chr15 | 35542250 | 35542350 | 1090-Lng-B-T | 160  | chr15:35542250-35542350 |
| chr15 | 35545650 | 35545750 | 1223-Lng-D-T | 41   | chr15:35545650-35545750 |
| chr15 | 35550250 | 35550350 | 1065-Lng-B-T | 61   | chr15:35550250-35550350 |
| chr15 | 35551550 | 35551650 | 1072-Lng-A-T | 169  | chr15:35551550-35551650 |
| chr15 | 35580250 | 35580350 | 1223-Lng-B-T | 35   | chr15:35580250-35580350 |
| chr15 | 35580750 | 35580850 | 1065-Lng-B-T | 112  | chr15:35580750-35580850 |
| chr15 | 35581550 | 35581650 | 1100-Lng-A-T | 143  | chr15:35581550-35581650 |
| chr15 | 35604350 | 35604450 | 1065-Lng-B-T | 49   | chr15:35604350-35604450 |
| chr15 | 35625550 | 35625650 | 901-Lng-D-T  | 309  | chr15:35625550-35625650 |
| chr15 | 35627850 | 35627950 | 901-Lng-D-T  | 434  | chr15:35627850-35627950 |
| chr15 | 35633250 | 35633350 | 901-Lng-B-T  | 541  | chr15:35633250-35633350 |
| chr15 | 35639750 | 35639850 | 1223-Lng-B-T | 197  | chr15:35639750-35639850 |
| chr15 | 35652850 | 35652950 | 1072-Lng-A-T | 64   | chr15:35652850-35652950 |
| chr15 | 35662350 | 35662450 | 1065-Lng-B-T | 64   | chr15:35662350-35662450 |
| chr15 | 35680750 | 35680850 | 901-Lng-A-T  | 96   | chr15:35680750-35680850 |
| chr15 | 35685250 | 35685350 | 1274-Lng-A-T | 51   | chr15:35685250-35685350 |
| chr15 | 35685350 | 35685450 | 901-Lng-A-T  | 96   | chr15:35685350-35685450 |
| chr15 | 35688750 | 35688850 | 1223-Lng-C-T | 61   | chr15:35688750-35688850 |
| chr15 | 35695750 | 35695850 | 1223-Lng-A-T | 84   | chr15:35695750-35695850 |
| chr15 | 35709050 | 35709150 | 1072-Lng-A-T | 54   | chr15:35709050-35709150 |
| chr15 | 35746950 | 35747050 | 1004-Lng-A-T | 912  | chr15:35746950-35747050 |
| chr15 | 35815250 | 35815350 | 1065-Lng-C-T | 63   | chr15:35815250-35815350 |
| chr15 | 35815550 | 35815650 | 1065-Lng-B-T | 169  | chr15:35815550-35815650 |
| chr15 | 35825050 | 35825150 | 1065-Lng-B-T | 132  | chr15:35825050-35825150 |
| chr15 | 35840350 | 35840450 | 1065-Lng-C-T | 78   | chr15:35840350-35840450 |



**Table S2: SB Insertion regions**

|       |          |          |              |      |                         |
|-------|----------|----------|--------------|------|-------------------------|
| chr15 | 35882450 | 35882550 | 1065-Lng-A-T | 95   | chr15:35882450-35882550 |
| chr15 | 35955150 | 35955250 | 1065-Lng-C-T | 90   | chr15:35955150-35955250 |
| chr15 | 35975050 | 35975150 | 1065-Lng-A-T | 72   | chr15:35975050-35975150 |
| chr15 | 36037550 | 36037650 | 1065-Lng-B-T | 40   | chr15:36037550-36037650 |
| chr15 | 36081150 | 36081250 | 1065-Lng-B-T | 39   | chr15:36081150-36081250 |
| chr15 | 36093350 | 36093450 | 1065-Lng-B-T | 41   | chr15:36093350-36093450 |
| chr15 | 36111350 | 36111450 | 1090-Lng-A-T | 48   | chr15:36111350-36111450 |
| chr15 | 36119150 | 36119250 | 1065-Lng-B-T | 50   | chr15:36119150-36119250 |
| chr15 | 36191050 | 36191150 | 846-Lng-A-T  | 52   | chr15:36191050-36191150 |
| chr15 | 36199850 | 36199950 | 901-Lng-B-T  | 212  | chr15:36199850-36199950 |
| chr15 | 36210650 | 36210750 | 1065-Lng-B-T | 60   | chr15:36210650-36210750 |
| chr15 | 36211950 | 36212050 | 1072-Lng-A-T | 83   | chr15:36211950-36212050 |
| chr15 | 36254450 | 36254550 | 1065-Lng-C-T | 68   | chr15:36254450-36254550 |
| chr15 | 36276450 | 36276550 | 1151-Lng-A-T | 391  | chr15:36276450-36276550 |
| chr15 | 36308350 | 36308450 | 1167-Lng-A-T | 56   | chr15:36308350-36308450 |
| chr15 | 36322550 | 36322650 | 846-Lng-A-T  | 325  | chr15:36322550-36322650 |
| chr15 | 36329850 | 36329950 | 901-Lng-C-T  | 36   | chr15:36329850-36329950 |
| chr15 | 36353250 | 36353350 | 1090-Lng-A-T | 374  | chr15:36353250-36353350 |
| chr15 | 36357750 | 36357850 | 1167-Lng-A-T | 132  | chr15:36357750-36357850 |
| chr15 | 36406650 | 36406750 | 901-Lng-A-T  | 125  | chr15:36406650-36406750 |
| chr15 | 36410350 | 36410450 | 901-Lng-B-T  | 39   | chr15:36410350-36410450 |
| chr15 | 36415450 | 36415550 | 1223-Lng-B-T | 34   | chr15:36415450-36415550 |
| chr15 | 36423350 | 36423450 | 1065-Lng-B-T | 87   | chr15:36423350-36423450 |
| chr15 | 36531450 | 36531550 | 1004-Lng-A-T | 71   | chr15:36531450-36531550 |
| chr15 | 36531950 | 36532050 | 846-Lng-A-T  | 123  | chr15:36531950-36532050 |
| chr15 | 36534950 | 36535050 | 846-Lng-A-T  | 106  | chr15:36534950-36535050 |
| chr15 | 36598950 | 36599050 | 1167-Lng-A-T | 120  | chr15:36598950-36599050 |
| chr15 | 36646550 | 36646650 | 1274-Lng-A-T | 135  | chr15:36646550-36646650 |
| chr15 | 36648250 | 36648350 | 1072-Lng-A-T | 57   | chr15:36648250-36648350 |
| chr15 | 36693450 | 36693550 | 846-Lng-A-T  | 159  | chr15:36693450-36693550 |
| chr15 | 36698950 | 36699050 | 1072-Lng-A-T | 68   | chr15:36698950-36699050 |
| chr15 | 36698950 | 36699050 | 901-Lng-C-T  | 79   | chr15:36698950-36699050 |
| chr15 | 36709050 | 36709150 | 1065-Lng-A-T | 113  | chr15:36709050-36709150 |
| chr15 | 36713750 | 36713850 | 1065-Lng-C-T | 62   | chr15:36713750-36713850 |
| chr15 | 36714950 | 36715050 | 1152-Lng-A-T | 42   | chr15:36714950-36715050 |
| chr15 | 36775150 | 36775250 | 1072-Lng-A-T | 60   | chr15:36775150-36775250 |
| chr15 | 36866550 | 36866650 | 1065-Lng-A-T | 45   | chr15:36866550-36866650 |
| chr15 | 36874150 | 36874250 | 1100-Lng-A-T | 55   | chr15:36874150-36874250 |
| chr15 | 36932150 | 36932250 | 1004-Lng-A-T | 50   | chr15:36932150-36932250 |
| chr15 | 36932650 | 36932750 | 1072-Lng-A-T | 134  | chr15:36932650-36932750 |
| chr15 | 36935450 | 36935550 | 901-Lng-C-T  | 60   | chr15:36935450-36935550 |
| chr15 | 36965750 | 36965850 | 1223-Lng-A-T | 128  | chr15:36965750-36965850 |
| chr15 | 37057350 | 37057450 | 1223-Lng-D-T | 42   | chr15:37057350-37057450 |
| chr15 | 37119650 | 37119750 | 901-Lng-A-T  | 276  | chr15:37119650-37119750 |
| chr15 | 37131850 | 37131950 | 1090-Lng-A-T | 60   | chr15:37131850-37131950 |
| chr15 | 37151050 | 37151150 | 1004-Lng-A-T | 1052 | chr15:37151050-37151150 |

**Table S2: SB Insertion regions**

|       |          |          |              |     |                         |
|-------|----------|----------|--------------|-----|-------------------------|
| chr15 | 37155250 | 37155350 | 1065-Lng-A-T | 110 | chr15:37155250-37155350 |
| chr15 | 37171250 | 37171350 | 1100-Lng-A-T | 53  | chr15:37171250-37171350 |
| chr15 | 37177750 | 37177850 | 846-Lng-A-T  | 138 | chr15:37177750-37177850 |
| chr15 | 37194350 | 37194450 | 901-Lng-A-T  | 121 | chr15:37194350-37194450 |
| chr15 | 37198150 | 37198250 | 1223-Lng-C-T | 100 | chr15:37198150-37198250 |
| chr15 | 37205650 | 37205750 | 1223-Lng-B-T | 35  | chr15:37205650-37205750 |
| chr15 | 37206750 | 37206850 | 1223-Lng-A-T | 182 | chr15:37206750-37206850 |
| chr15 | 37214250 | 37214350 | 1100-Lng-A-T | 60  | chr15:37214250-37214350 |
| chr15 | 37269150 | 37269250 | 1065-Lng-C-T | 81  | chr15:37269150-37269250 |
| chr15 | 37281150 | 37281250 | 1065-Lng-B-T | 47  | chr15:37281150-37281250 |
| chr15 | 37293750 | 37293850 | 1004-Lng-A-T | 105 | chr15:37293750-37293850 |
| chr15 | 37303450 | 37303550 | 1072-Lng-A-T | 54  | chr15:37303450-37303550 |
| chr15 | 37339050 | 37339150 | 901-Lng-B-T  | 39  | chr15:37339050-37339150 |
| chr15 | 37410750 | 37410850 | 846-Lng-A-T  | 64  | chr15:37410750-37410850 |
| chr15 | 37432750 | 37432850 | 1090-Lng-A-T | 71  | chr15:37432750-37432850 |
| chr15 | 37508750 | 37508850 | 1072-Lng-A-T | 176 | chr15:37508750-37508850 |
| chr15 | 37514150 | 37514250 | 1065-Lng-B-T | 50  | chr15:37514150-37514250 |
| chr15 | 37603250 | 37603350 | 901-Lng-D-T  | 40  | chr15:37603250-37603350 |
| chr15 | 37626150 | 37626250 | 901-Lng-A-T  | 60  | chr15:37626150-37626250 |
| chr15 | 37861150 | 37861250 | 846-Lng-A-T  | 176 | chr15:37861150-37861250 |
| chr15 | 37886250 | 37886350 | 1065-Lng-B-T | 41  | chr15:37886250-37886350 |
| chr15 | 37898550 | 37898650 | 1223-Lng-B-T | 37  | chr15:37898550-37898650 |
| chr15 | 37906550 | 37906650 | 901-Lng-C-T  | 41  | chr15:37906550-37906650 |
| chr15 | 37909850 | 37909950 | 901-Lng-A-T  | 315 | chr15:37909850-37909950 |
| chr15 | 37931150 | 37931250 | 1152-Lng-A-T | 49  | chr15:37931150-37931250 |
| chr15 | 37933150 | 37933250 | 1152-Lng-A-T | 54  | chr15:37933150-37933250 |
| chr15 | 37943550 | 37943650 | 901-Lng-D-T  | 100 | chr15:37943550-37943650 |
| chr15 | 37945450 | 37945550 | 901-Lng-D-T  | 323 | chr15:37945450-37945550 |
| chr15 | 37953550 | 37953650 | 1100-Lng-B-T | 304 | chr15:37953550-37953650 |
| chr15 | 37956150 | 37956250 | 1223-Lng-D-T | 44  | chr15:37956150-37956250 |
| chr15 | 37972950 | 37973050 | 1188-Lng-A-T | 206 | chr15:37972950-37973050 |
| chr15 | 37977050 | 37977150 | 1100-Lng-A-T | 238 | chr15:37977050-37977150 |
| chr15 | 37979550 | 37979650 | 1223-Lng-A-T | 155 | chr15:37979550-37979650 |
| chr15 | 38006150 | 38006250 | 1065-Lng-A-T | 45  | chr15:38006150-38006250 |
| chr15 | 38091750 | 38091850 | 901-Lng-D-T  | 64  | chr15:38091750-38091850 |
| chr15 | 38098450 | 38098550 | 1100-Lng-A-T | 60  | chr15:38098450-38098550 |
| chr15 | 38225150 | 38225250 | 1223-Lng-C-T | 46  | chr15:38225150-38225250 |
| chr15 | 38233550 | 38233650 | 1065-Lng-A-T | 70  | chr15:38233550-38233650 |
| chr15 | 38254050 | 38254150 | 1223-Lng-B-T | 202 | chr15:38254050-38254150 |
| chr15 | 38283850 | 38283950 | 1004-Lng-A-T | 122 | chr15:38283850-38283950 |
| chr15 | 38305450 | 38305550 | 1100-Lng-A-T | 53  | chr15:38305450-38305550 |
| chr15 | 38311250 | 38311350 | 1065-Lng-B-T | 60  | chr15:38311250-38311350 |
| chr15 | 38338450 | 38338550 | 1072-Lng-A-T | 192 | chr15:38338450-38338550 |
| chr15 | 38356550 | 38356650 | 1072-Lng-A-T | 55  | chr15:38356550-38356650 |
| chr15 | 38391550 | 38391650 | 1090-Lng-A-T | 62  | chr15:38391550-38391650 |
| chr15 | 38398350 | 38398450 | 1065-Lng-A-T | 70  | chr15:38398350-38398450 |

**Table S2: SB Insertion regions**

|       |          |          |              |      |                         |
|-------|----------|----------|--------------|------|-------------------------|
| chr15 | 38415550 | 38415650 | 901-Lng-C-T  | 82   | chr15:38415550-38415650 |
| chr15 | 38432650 | 38432750 | 1004-Lng-A-T | 221  | chr15:38432650-38432750 |
| chr15 | 38475950 | 38476050 | 1065-Lng-A-T | 39   | chr15:38475950-38476050 |
| chr15 | 38491550 | 38491650 | 1090-Lng-A-T | 45   | chr15:38491550-38491650 |
| chr15 | 38508550 | 38508650 | 1072-Lng-A-T | 107  | chr15:38508550-38508650 |
| chr15 | 38550550 | 38550650 | 1004-Lng-A-T | 49   | chr15:38550550-38550650 |
| chr15 | 38558450 | 38558550 | 1167-Lng-A-T | 45   | chr15:38558450-38558550 |
| chr15 | 38573750 | 38573850 | 901-Lng-B-T  | 133  | chr15:38573750-38573850 |
| chr15 | 38577850 | 38577950 | 1167-Lng-A-T | 163  | chr15:38577850-38577950 |
| chr15 | 38583050 | 38583150 | 901-Lng-B-T  | 41   | chr15:38583050-38583150 |
| chr15 | 38598750 | 38598850 | 1065-Lng-A-T | 75   | chr15:38598750-38598850 |
| chr15 | 38598750 | 38598850 | 1065-Lng-B-T | 60   | chr15:38598750-38598850 |
| chr15 | 38610850 | 38610950 | 1065-Lng-B-T | 71   | chr15:38610850-38610950 |
| chr15 | 38619250 | 38619350 | 1223-Lng-D-T | 56   | chr15:38619250-38619350 |
| chr15 | 38777050 | 38777150 | 901-Lng-C-T  | 164  | chr15:38777050-38777150 |
| chr15 | 38786150 | 38786250 | 1065-Lng-B-T | 92   | chr15:38786150-38786250 |
| chr15 | 38796650 | 38796750 | 1223-Lng-C-T | 254  | chr15:38796650-38796750 |
| chr15 | 38801450 | 38801550 | 1223-Lng-A-T | 118  | chr15:38801450-38801550 |
| chr15 | 38811650 | 38811750 | 1167-Lng-A-T | 107  | chr15:38811650-38811750 |
| chr15 | 38815350 | 38815450 | 1065-Lng-A-T | 42   | chr15:38815350-38815450 |
| chr15 | 38840350 | 38840450 | 1065-Lng-A-T | 38   | chr15:38840350-38840450 |
| chr15 | 38850850 | 38850950 | 901-Lng-B-T  | 239  | chr15:38850850-38850950 |
| chr15 | 38861050 | 38861150 | 901-Lng-C-T  | 59   | chr15:38861050-38861150 |
| chr15 | 38865650 | 38865750 | 1223-Lng-B-T | 95   | chr15:38865650-38865750 |
| chr15 | 38917650 | 38917750 | 901-Lng-B-T  | 154  | chr15:38917650-38917750 |
| chr15 | 38925050 | 38925150 | 1167-Lng-A-T | 66   | chr15:38925050-38925150 |
| chr15 | 38929950 | 38930050 | 1072-Lng-A-T | 118  | chr15:38929950-38930050 |
| chr15 | 38942350 | 38942450 | 1072-Lng-A-T | 69   | chr15:38942350-38942450 |
| chr15 | 38948650 | 38948750 | 901-Lng-C-T  | 53   | chr15:38948650-38948750 |
| chr15 | 38949550 | 38949650 | 1065-Lng-C-T | 65   | chr15:38949550-38949650 |
| chr15 | 38951050 | 38951150 | 846-Lng-A-T  | 90   | chr15:38951050-38951150 |
| chr15 | 38951950 | 38952050 | 1004-Lng-A-T | 113  | chr15:38951950-38952050 |
| chr15 | 38955450 | 38955550 | 846-Lng-A-T  | 56   | chr15:38955450-38955550 |
| chr15 | 38965750 | 38965850 | 1072-Lng-A-T | 58   | chr15:38965750-38965850 |
| chr15 | 38967150 | 38967250 | 1223-Lng-D-T | 41   | chr15:38967150-38967250 |
| chr15 | 38973450 | 38973550 | 1072-Lng-A-T | 48   | chr15:38973450-38973550 |
| chr15 | 39033650 | 39033750 | 1090-Lng-A-T | 112  | chr15:39033650-39033750 |
| chr15 | 39071850 | 39071950 | 901-Lng-C-T  | 163  | chr15:39071850-39071950 |
| chr15 | 39080750 | 39080850 | 1065-Lng-C-T | 78   | chr15:39080750-39080850 |
| chr15 | 39101650 | 39101750 | 1065-Lng-B-T | 61   | chr15:39101650-39101750 |
| chr15 | 39159250 | 39159350 | 1065-Lng-A-T | 61   | chr15:39159250-39159350 |
| chr15 | 39192750 | 39192850 | 1223-Lng-B-T | 1424 | chr15:39192750-39192850 |
| chr15 | 39198050 | 39198150 | 1223-Lng-B-T | 40   | chr15:39198050-39198150 |
| chr15 | 39221250 | 39221350 | 901-Lng-A-T  | 56   | chr15:39221250-39221350 |
| chr15 | 39230850 | 39230950 | 1065-Lng-B-T | 63   | chr15:39230850-39230950 |
| chr15 | 39230950 | 39231050 | 901-Lng-C-T  | 75   | chr15:39230950-39231050 |

**Table S2: SB Insertion regions**

|       |          |          |              |      |                         |
|-------|----------|----------|--------------|------|-------------------------|
| chr15 | 39240950 | 39241050 | 1065-Lng-C-T | 80   | chr15:39240950-39241050 |
| chr15 | 39265350 | 39265450 | 1004-Lng-A-T | 75   | chr15:39265350-39265450 |
| chr15 | 39286850 | 39286950 | 901-Lng-A-T  | 104  | chr15:39286850-39286950 |
| chr15 | 39312550 | 39312650 | 1004-Lng-A-T | 99   | chr15:39312550-39312650 |
| chr15 | 39318950 | 39319050 | 1065-Lng-B-T | 39   | chr15:39318950-39319050 |
| chr15 | 39338950 | 39339050 | 901-Lng-B-T  | 103  | chr15:39338950-39339050 |
| chr15 | 39368650 | 39368750 | 846-Lng-A-T  | 769  | chr15:39368650-39368750 |
| chr15 | 39404150 | 39404250 | 901-Lng-C-T  | 187  | chr15:39404150-39404250 |
| chr15 | 39417150 | 39417250 | 1090-Lng-A-T | 53   | chr15:39417150-39417250 |
| chr15 | 39421650 | 39421750 | 901-Lng-B-T  | 159  | chr15:39421650-39421750 |
| chr15 | 39430250 | 39430350 | 901-Lng-B-T  | 65   | chr15:39430250-39430350 |
| chr15 | 39435650 | 39435750 | 1090-Lng-A-T | 47   | chr15:39435650-39435750 |
| chr15 | 39490750 | 39490850 | 901-Lng-D-T  | 375  | chr15:39490750-39490850 |
| chr15 | 39493150 | 39493250 | 1065-Lng-A-T | 37   | chr15:39493150-39493250 |
| chr15 | 39493150 | 39493250 | 1065-Lng-C-T | 1862 | chr15:39493150-39493250 |
| chr15 | 39498750 | 39498850 | 901-Lng-C-T  | 133  | chr15:39498750-39498850 |
| chr15 | 39500150 | 39500250 | 1223-Lng-B-T | 51   | chr15:39500150-39500250 |
| chr15 | 39537450 | 39537550 | 1004-Lng-A-T | 114  | chr15:39537450-39537550 |
| chr15 | 39591350 | 39591450 | 1167-Lng-A-T | 145  | chr15:39591350-39591450 |
| chr15 | 39596650 | 39596750 | 1004-Lng-A-T | 50   | chr15:39596650-39596750 |
| chr15 | 39620550 | 39620650 | 1065-Lng-A-T | 73   | chr15:39620550-39620650 |
| chr15 | 39637750 | 39637850 | 901-Lng-B-T  | 50   | chr15:39637750-39637850 |
| chr15 | 39680250 | 39680350 | 901-Lng-D-T  | 174  | chr15:39680250-39680350 |
| chr15 | 39706850 | 39706950 | 901-Lng-A-T  | 57   | chr15:39706850-39706950 |
| chr15 | 39717050 | 39717150 | 1072-Lng-A-T | 199  | chr15:39717050-39717150 |
| chr15 | 39744550 | 39744650 | 1188-Lng-A-T | 67   | chr15:39744550-39744650 |
| chr15 | 39767350 | 39767450 | 1167-Lng-A-T | 181  | chr15:39767350-39767450 |
| chr15 | 39769150 | 39769250 | 901-Lng-B-T  | 111  | chr15:39769150-39769250 |
| chr15 | 39772850 | 39772950 | 1223-Lng-B-T | 323  | chr15:39772850-39772950 |
| chr15 | 39773250 | 39773350 | 1223-Lng-C-T | 51   | chr15:39773250-39773350 |
| chr15 | 39846950 | 39847050 | 1223-Lng-A-T | 96   | chr15:39846950-39847050 |
| chr15 | 39871450 | 39871550 | 1072-Lng-A-T | 80   | chr15:39871450-39871550 |
| chr15 | 39874850 | 39874950 | 1090-Lng-A-T | 209  | chr15:39874850-39874950 |
| chr15 | 39895550 | 39895650 | 1223-Lng-A-T | 85   | chr15:39895550-39895650 |
| chr15 | 39900350 | 39900450 | 1065-Lng-B-T | 71   | chr15:39900350-39900450 |
| chr15 | 39907450 | 39907550 | 1223-Lng-A-T | 1881 | chr15:39907450-39907550 |
| chr15 | 39952050 | 39952150 | 901-Lng-B-T  | 690  | chr15:39952050-39952150 |
| chr15 | 39985850 | 39985950 | 1065-Lng-C-T | 1443 | chr15:39985850-39985950 |
| chr15 | 39999550 | 39999650 | 901-Lng-A-T  | 54   | chr15:39999550-39999650 |
| chr15 | 40122350 | 40122450 | 901-Lng-A-T  | 68   | chr15:40122350-40122450 |
| chr15 | 40168550 | 40168650 | 1223-Lng-A-T | 1424 | chr15:40168550-40168650 |
| chr15 | 40236650 | 40236750 | 1065-Lng-A-T | 60   | chr15:40236650-40236750 |
| chr15 | 40240850 | 40240950 | 1274-Lng-A-T | 72   | chr15:40240850-40240950 |
| chr15 | 40244250 | 40244350 | 1065-Lng-A-T | 97   | chr15:40244250-40244350 |
| chr15 | 40250150 | 40250250 | 1072-Lng-A-T | 186  | chr15:40250150-40250250 |
| chr15 | 40264450 | 40264550 | 1065-Lng-A-T | 89   | chr15:40264450-40264550 |

**Table S2: SB Insertion regions**

|       |          |          |              |     |                         |
|-------|----------|----------|--------------|-----|-------------------------|
| chr15 | 40268750 | 40268850 | 1188-Lng-A-T | 178 | chr15:40268750-40268850 |
| chr15 | 40286150 | 40286250 | 846-Lng-A-T  | 98  | chr15:40286150-40286250 |
| chr15 | 40303750 | 40303850 | 1065-Lng-C-T | 89  | chr15:40303750-40303850 |
| chr15 | 40325350 | 40325450 | 1004-Lng-A-T | 75  | chr15:40325350-40325450 |
| chr15 | 40345850 | 40345950 | 1223-Lng-A-T | 153 | chr15:40345850-40345950 |
| chr15 | 40353950 | 40354050 | 1065-Lng-A-T | 40  | chr15:40353950-40354050 |
| chr15 | 40379150 | 40379250 | 1223-Lng-B-T | 310 | chr15:40379150-40379250 |
| chr15 | 40457950 | 40458050 | 1065-Lng-B-T | 39  | chr15:40457950-40458050 |
| chr15 | 40484350 | 40484450 | 1223-Lng-B-T | 37  | chr15:40484350-40484450 |
| chr15 | 40542950 | 40543050 | 901-Lng-B-T  | 67  | chr15:40542950-40543050 |
| chr15 | 40543950 | 40544050 | 1223-Lng-D-T | 71  | chr15:40543950-40544050 |
| chr15 | 40551250 | 40551350 | 901-Lng-C-T  | 41  | chr15:40551250-40551350 |
| chr15 | 40565750 | 40565850 | 901-Lng-C-T  | 93  | chr15:40565750-40565850 |
| chr15 | 40577250 | 40577350 | 1065-Lng-B-T | 72  | chr15:40577250-40577350 |
| chr15 | 40594350 | 40594450 | 1065-Lng-A-T | 84  | chr15:40594350-40594450 |
| chr15 | 40594650 | 40594750 | 901-Lng-C-T  | 140 | chr15:40594650-40594750 |
| chr15 | 40599650 | 40599750 | 901-Lng-D-T  | 336 | chr15:40599650-40599750 |
| chr15 | 40608250 | 40608350 | 1065-Lng-C-T | 66  | chr15:40608250-40608350 |
| chr15 | 40649150 | 40649250 | 1223-Lng-A-T | 169 | chr15:40649150-40649250 |
| chr15 | 40650650 | 40650750 | 901-Lng-A-T  | 85  | chr15:40650650-40650750 |
| chr15 | 40676950 | 40677050 | 1065-Lng-A-T | 663 | chr15:40676950-40677050 |
| chr15 | 40681850 | 40681950 | 901-Lng-D-T  | 103 | chr15:40681850-40681950 |
| chr15 | 40707850 | 40707950 | 1065-Lng-B-T | 95  | chr15:40707850-40707950 |
| chr15 | 40708350 | 40708450 | 901-Lng-B-T  | 49  | chr15:40708350-40708450 |
| chr15 | 40742950 | 40743050 | 1065-Lng-B-T | 83  | chr15:40742950-40743050 |
| chr15 | 40765550 | 40765650 | 1065-Lng-A-T | 59  | chr15:40765550-40765650 |
| chr15 | 40786650 | 40786750 | 1100-Lng-A-T | 90  | chr15:40786650-40786750 |
| chr15 | 40799350 | 40799450 | 1100-Lng-A-T | 86  | chr15:40799350-40799450 |
| chr15 | 40814650 | 40814750 | 1223-Lng-D-T | 49  | chr15:40814650-40814750 |
| chr15 | 40820850 | 40820950 | 901-Lng-A-T  | 157 | chr15:40820850-40820950 |
| chr15 | 40854050 | 40854150 | 901-Lng-C-T  | 73  | chr15:40854050-40854150 |
| chr15 | 40893050 | 40893150 | 1223-Lng-B-T | 55  | chr15:40893050-40893150 |
| chr15 | 40902450 | 40902550 | 1065-Lng-C-T | 78  | chr15:40902450-40902550 |
| chr15 | 40946450 | 40946550 | 1004-Lng-A-T | 119 | chr15:40946450-40946550 |
| chr15 | 40951150 | 40951250 | 901-Lng-C-T  | 58  | chr15:40951150-40951250 |
| chr15 | 40957050 | 40957150 | 1065-Lng-B-T | 42  | chr15:40957050-40957150 |
| chr15 | 40973850 | 40973950 | 1152-Lng-A-T | 53  | chr15:40973850-40973950 |
| chr15 | 41039450 | 41039550 | 1004-Lng-A-T | 176 | chr15:41039450-41039550 |
| chr15 | 41100950 | 41101050 | 1072-Lng-A-T | 53  | chr15:41100950-41101050 |
| chr15 | 41127850 | 41127950 | 901-Lng-A-T  | 129 | chr15:41127850-41127950 |
| chr15 | 41144650 | 41144750 | 901-Lng-C-T  | 74  | chr15:41144650-41144750 |
| chr15 | 41155250 | 41155350 | 901-Lng-A-T  | 58  | chr15:41155250-41155350 |
| chr15 | 41159750 | 41159850 | 1090-Lng-A-T | 51  | chr15:41159750-41159850 |
| chr15 | 41163050 | 41163150 | 1072-Lng-A-T | 72  | chr15:41163050-41163150 |
| chr15 | 41216850 | 41216950 | 846-Lng-A-T  | 84  | chr15:41216850-41216950 |
| chr15 | 41221650 | 41221750 | 1072-Lng-A-T | 62  | chr15:41221650-41221750 |

**Table S2: SB Insertion regions**

|       |          |          |              |      |                         |
|-------|----------|----------|--------------|------|-------------------------|
| chr15 | 41245250 | 41245350 | 1223-Lng-A-T | 234  | chr15:41245250-41245350 |
| chr15 | 41252250 | 41252350 | 1223-Lng-A-T | 134  | chr15:41252250-41252350 |
| chr15 | 41295250 | 41295350 | 1167-Lng-A-T | 59   | chr15:41295250-41295350 |
| chr15 | 41301150 | 41301250 | 1072-Lng-A-T | 126  | chr15:41301150-41301250 |
| chr15 | 41446950 | 41447050 | 1223-Lng-B-T | 98   | chr15:41446950-41447050 |
| chr15 | 41456150 | 41456250 | 901-Lng-C-T  | 51   | chr15:41456150-41456250 |
| chr15 | 41465750 | 41465850 | 1065-Lng-A-T | 50   | chr15:41465750-41465850 |
| chr15 | 41466150 | 41466250 | 901-Lng-C-T  | 211  | chr15:41466150-41466250 |
| chr15 | 41480750 | 41480850 | 1223-Lng-B-T | 61   | chr15:41480750-41480850 |
| chr15 | 41484550 | 41484650 | 1090-Lng-A-T | 71   | chr15:41484550-41484650 |
| chr15 | 41491050 | 41491150 | 1223-Lng-A-T | 3758 | chr15:41491050-41491150 |
| chr15 | 41498350 | 41498450 | 901-Lng-B-T  | 153  | chr15:41498350-41498450 |
| chr15 | 41526550 | 41526650 | 1004-Lng-A-T | 76   | chr15:41526550-41526650 |
| chr15 | 41526650 | 41526750 | 901-Lng-A-T  | 67   | chr15:41526650-41526750 |
| chr15 | 41569050 | 41569150 | 1090-Lng-A-T | 47   | chr15:41569050-41569150 |
| chr15 | 41569250 | 41569350 | 1167-Lng-A-T | 60   | chr15:41569250-41569350 |
| chr15 | 41571750 | 41571850 | 1223-Lng-C-T | 49   | chr15:41571750-41571850 |
| chr15 | 41572150 | 41572250 | 901-Lng-B-T  | 305  | chr15:41572150-41572250 |
| chr15 | 41591850 | 41591950 | 1072-Lng-A-T | 72   | chr15:41591850-41591950 |
| chr15 | 41594350 | 41594450 | 1072-Lng-A-T | 70   | chr15:41594350-41594450 |
| chr15 | 41607350 | 41607450 | 1065-Lng-B-T | 51   | chr15:41607350-41607450 |
| chr15 | 41627050 | 41627150 | 1223-Lng-D-T | 93   | chr15:41627050-41627150 |
| chr15 | 41629750 | 41629850 | 1223-Lng-A-T | 51   | chr15:41629750-41629850 |
| chr15 | 41645850 | 41645950 | 1223-Lng-D-T | 376  | chr15:41645850-41645950 |
| chr15 | 41646850 | 41646950 | 901-Lng-A-T  | 100  | chr15:41646850-41646950 |
| chr15 | 41659050 | 41659150 | 1223-Lng-A-T | 116  | chr15:41659050-41659150 |
| chr15 | 41663450 | 41663550 | 901-Lng-B-T  | 63   | chr15:41663450-41663550 |
| chr15 | 41669650 | 41669750 | 1223-Lng-A-T | 121  | chr15:41669650-41669750 |
| chr15 | 41671250 | 41671350 | 1065-Lng-A-T | 66   | chr15:41671250-41671350 |
| chr15 | 41683950 | 41684050 | 901-Lng-C-T  | 177  | chr15:41683950-41684050 |
| chr15 | 41686550 | 41686650 | 1167-Lng-A-T | 72   | chr15:41686550-41686650 |
| chr15 | 41687650 | 41687750 | 1167-Lng-A-T | 65   | chr15:41687650-41687750 |
| chr15 | 41689150 | 41689250 | 1223-Lng-A-T | 110  | chr15:41689150-41689250 |
| chr15 | 41710350 | 41710450 | 901-Lng-C-T  | 52   | chr15:41710350-41710450 |
| chr15 | 41713150 | 41713250 | 901-Lng-A-T  | 65   | chr15:41713150-41713250 |
| chr15 | 41735550 | 41735650 | 901-Lng-A-T  | 96   | chr15:41735550-41735650 |
| chr15 | 41739350 | 41739450 | 901-Lng-C-T  | 72   | chr15:41739350-41739450 |
| chr15 | 41745750 | 41745850 | 901-Lng-B-T  | 96   | chr15:41745750-41745850 |
| chr15 | 41748650 | 41748750 | 846-Lng-A-T  | 144  | chr15:41748650-41748750 |
| chr15 | 41751050 | 41751150 | 1223-Lng-A-T | 340  | chr15:41751050-41751150 |
| chr15 | 41802750 | 41802850 | 1065-Lng-B-T | 365  | chr15:41802750-41802850 |
| chr15 | 41817250 | 41817350 | 1065-Lng-A-T | 49   | chr15:41817250-41817350 |
| chr15 | 41878850 | 41878950 | 1065-Lng-A-T | 67   | chr15:41878850-41878950 |
| chr15 | 41881150 | 41881250 | 1152-Lng-A-T | 73   | chr15:41881150-41881250 |
| chr15 | 41926650 | 41926750 | 901-Lng-C-T  | 198  | chr15:41926650-41926750 |
| chr15 | 41949850 | 41949950 | 1223-Lng-A-T | 87   | chr15:41949850-41949950 |

**Table S2: SB Insertion regions**

|       |          |          |              |      |                         |
|-------|----------|----------|--------------|------|-------------------------|
| chr15 | 41952250 | 41952350 | 1065-Lng-A-T | 37   | chr15:41952250-41952350 |
| chr15 | 41991450 | 41991550 | 846-Lng-A-T  | 147  | chr15:41991450-41991550 |
| chr15 | 41992750 | 41992850 | 1004-Lng-A-T | 84   | chr15:41992750-41992850 |
| chr15 | 42021450 | 42021550 | 901-Lng-B-T  | 57   | chr15:42021450-42021550 |
| chr15 | 42059050 | 42059150 | 901-Lng-D-T  | 247  | chr15:42059050-42059150 |
| chr15 | 42064950 | 42065050 | 1065-Lng-B-T | 134  | chr15:42064950-42065050 |
| chr15 | 42069750 | 42069850 | 901-Lng-B-T  | 148  | chr15:42069750-42069850 |
| chr15 | 42069750 | 42069850 | 1072-Lng-A-T | 114  | chr15:42069750-42069850 |
| chr15 | 42113850 | 42113950 | 1065-Lng-B-T | 67   | chr15:42113850-42113950 |
| chr15 | 42124850 | 42124950 | 1274-Lng-A-T | 71   | chr15:42124850-42124950 |
| chr15 | 42134050 | 42134150 | 1004-Lng-A-T | 135  | chr15:42134050-42134150 |
| chr15 | 42209050 | 42209150 | 901-Lng-D-T  | 354  | chr15:42209050-42209150 |
| chr15 | 42215650 | 42215750 | 1065-Lng-B-T | 61   | chr15:42215650-42215750 |
| chr15 | 42220250 | 42220350 | 1004-Lng-A-T | 411  | chr15:42220250-42220350 |
| chr15 | 42239650 | 42239750 | 1072-Lng-A-T | 80   | chr15:42239650-42239750 |
| chr15 | 42261550 | 42261650 | 1090-Lng-B-T | 144  | chr15:42261550-42261650 |
| chr15 | 42267250 | 42267350 | 901-Lng-B-T  | 107  | chr15:42267250-42267350 |
| chr15 | 42316450 | 42316550 | 1065-Lng-B-T | 88   | chr15:42316450-42316550 |
| chr15 | 42355750 | 42355850 | 901-Lng-A-T  | 67   | chr15:42355750-42355850 |
| chr15 | 42357250 | 42357350 | 1065-Lng-C-T | 75   | chr15:42357250-42357350 |
| chr15 | 42379050 | 42379150 | 1065-Lng-A-T | 34   | chr15:42379050-42379150 |
| chr15 | 42381150 | 42381250 | 1090-Lng-A-T | 46   | chr15:42381150-42381250 |
| chr15 | 42398250 | 42398350 | 1167-Lng-A-T | 45   | chr15:42398250-42398350 |
| chr15 | 42420250 | 42420350 | 1090-Lng-A-T | 79   | chr15:42420250-42420350 |
| chr15 | 42426850 | 42426950 | 1065-Lng-C-T | 77   | chr15:42426850-42426950 |
| chr15 | 42450850 | 42450950 | 901-Lng-C-T  | 106  | chr15:42450850-42450950 |
| chr15 | 42486450 | 42486550 | 1223-Lng-B-T | 334  | chr15:42486450-42486550 |
| chr15 | 42490650 | 42490750 | 901-Lng-A-T  | 208  | chr15:42490650-42490750 |
| chr15 | 42517050 | 42517150 | 1090-Lng-B-T | 81   | chr15:42517050-42517150 |
| chr15 | 42532350 | 42532450 | 1090-Lng-A-T | 117  | chr15:42532350-42532450 |
| chr15 | 42565850 | 42565950 | 1223-Lng-B-T | 135  | chr15:42565850-42565950 |
| chr15 | 42576350 | 42576450 | 1065-Lng-B-T | 83   | chr15:42576350-42576450 |
| chr15 | 42591650 | 42591750 | 1065-Lng-B-T | 59   | chr15:42591650-42591750 |
| chr15 | 42624450 | 42624550 | 901-Lng-B-T  | 225  | chr15:42624450-42624550 |
| chr15 | 42657750 | 42657850 | 1223-Lng-B-T | 41   | chr15:42657750-42657850 |
| chr15 | 42657950 | 42658050 | 1065-Lng-C-T | 65   | chr15:42657950-42658050 |
| chr15 | 42670550 | 42670650 | 1065-Lng-B-T | 73   | chr15:42670550-42670650 |
| chr15 | 42716150 | 42716250 | 1065-Lng-C-T | 78   | chr15:42716150-42716250 |
| chr15 | 42735350 | 42735450 | 1065-Lng-B-T | 176  | chr15:42735350-42735450 |
| chr15 | 42752250 | 42752350 | 901-Lng-B-T  | 61   | chr15:42752250-42752350 |
| chr15 | 42755750 | 42755850 | 1065-Lng-C-T | 98   | chr15:42755750-42755850 |
| chr15 | 42759850 | 42759950 | 846-Lng-A-T  | 92   | chr15:42759850-42759950 |
| chr15 | 42777950 | 42778050 | 846-Lng-A-T  | 215  | chr15:42777950-42778050 |
| chr15 | 42788350 | 42788450 | 1223-Lng-B-T | 54   | chr15:42788350-42788450 |
| chr15 | 42792450 | 42792550 | 901-Lng-B-T  | 195  | chr15:42792450-42792550 |
| chr15 | 42805650 | 42805750 | 1223-Lng-A-T | 1764 | chr15:42805650-42805750 |

**Table S2: SB Insertion regions**

|       |          |          |              |     |                         |
|-------|----------|----------|--------------|-----|-------------------------|
| chr15 | 42805950 | 42806050 | 901-Lng-C-T  | 118 | chr15:42805950-42806050 |
| chr15 | 42828850 | 42828950 | 1065-Lng-C-T | 67  | chr15:42828850-42828950 |
| chr15 | 42831250 | 42831350 | 1090-Lng-A-T | 51  | chr15:42831250-42831350 |
| chr15 | 42833950 | 42834050 | 901-Lng-C-T  | 84  | chr15:42833950-42834050 |
| chr15 | 42843350 | 42843450 | 901-Lng-A-T  | 69  | chr15:42843350-42843450 |
| chr15 | 42854850 | 42854950 | 1090-Lng-A-T | 61  | chr15:42854850-42854950 |
| chr15 | 42859050 | 42859150 | 1065-Lng-B-T | 277 | chr15:42859050-42859150 |
| chr15 | 42893150 | 42893250 | 901-Lng-C-T  | 63  | chr15:42893150-42893250 |
| chr15 | 42894150 | 42894250 | 1223-Lng-C-T | 47  | chr15:42894150-42894250 |
| chr15 | 42901250 | 42901350 | 901-Lng-A-T  | 84  | chr15:42901250-42901350 |
| chr15 | 42912550 | 42912650 | 901-Lng-B-T  | 104 | chr15:42912550-42912650 |
| chr15 | 42916650 | 42916750 | 1072-Lng-A-T | 67  | chr15:42916650-42916750 |
| chr15 | 42936450 | 42936550 | 1223-Lng-A-T | 154 | chr15:42936450-42936550 |
| chr15 | 42936750 | 42936850 | 1072-Lng-A-T | 50  | chr15:42936750-42936850 |
| chr15 | 42941950 | 42942050 | 846-Lng-A-T  | 129 | chr15:42941950-42942050 |
| chr15 | 42947050 | 42947150 | 1223-Lng-B-T | 37  | chr15:42947050-42947150 |
| chr15 | 42969850 | 42969950 | 1065-Lng-B-T | 74  | chr15:42969850-42969950 |
| chr15 | 42985950 | 42986050 | 1090-Lng-A-T | 95  | chr15:42985950-42986050 |
| chr15 | 43051250 | 43051350 | 1065-Lng-C-T | 66  | chr15:43051250-43051350 |
| chr15 | 43056650 | 43056750 | 901-Lng-D-T  | 271 | chr15:43056650-43056750 |
| chr15 | 43066350 | 43066450 | 1223-Lng-C-T | 46  | chr15:43066350-43066450 |
| chr15 | 43072350 | 43072450 | 901-Lng-C-T  | 37  | chr15:43072350-43072450 |
| chr15 | 43072350 | 43072450 | 901-Lng-D-T  | 274 | chr15:43072350-43072450 |
| chr15 | 43074150 | 43074250 | 1223-Lng-A-T | 162 | chr15:43074150-43074250 |
| chr15 | 43074750 | 43074850 | 1065-Lng-A-T | 45  | chr15:43074750-43074850 |
| chr15 | 43080650 | 43080750 | 901-Lng-C-T  | 79  | chr15:43080650-43080750 |
| chr15 | 43081150 | 43081250 | 901-Lng-A-T  | 87  | chr15:43081150-43081250 |
| chr15 | 43081650 | 43081750 | 846-Lng-A-T  | 60  | chr15:43081650-43081750 |
| chr15 | 43082850 | 43082950 | 846-Lng-A-T  | 100 | chr15:43082850-43082950 |
| chr15 | 43090050 | 43090150 | 1100-Lng-A-T | 362 | chr15:43090050-43090150 |
| chr15 | 43092650 | 43092750 | 1065-Lng-B-T | 50  | chr15:43092650-43092750 |
| chr15 | 43092750 | 43092850 | 1072-Lng-A-T | 81  | chr15:43092750-43092850 |
| chr15 | 43093050 | 43093150 | 1223-Lng-D-T | 41  | chr15:43093050-43093150 |
| chr15 | 43094150 | 43094250 | 1072-Lng-A-T | 79  | chr15:43094150-43094250 |
| chr15 | 43094550 | 43094650 | 1090-Lng-A-T | 85  | chr15:43094550-43094650 |
| chr15 | 43096950 | 43097050 | 846-Lng-A-T  | 58  | chr15:43096950-43097050 |
| chr15 | 43099750 | 43099850 | 1072-Lng-A-T | 55  | chr15:43099750-43099850 |
| chr15 | 43100750 | 43100850 | 1090-Lng-A-T | 171 | chr15:43100750-43100850 |
| chr15 | 43102150 | 43102250 | 1188-Lng-A-T | 102 | chr15:43102150-43102250 |
| chr15 | 43106450 | 43106550 | 901-Lng-A-T  | 507 | chr15:43106450-43106550 |
| chr15 | 43134050 | 43134150 | 901-Lng-A-T  | 51  | chr15:43134050-43134150 |
| chr15 | 43143450 | 43143550 | 1065-Lng-B-T | 60  | chr15:43143450-43143550 |
| chr15 | 43156850 | 43156950 | 901-Lng-B-T  | 153 | chr15:43156850-43156950 |
| chr15 | 43190250 | 43190350 | 1065-Lng-A-T | 50  | chr15:43190250-43190350 |
| chr15 | 43198750 | 43198850 | 901-Lng-A-T  | 91  | chr15:43198750-43198850 |
| chr15 | 43247850 | 43247950 | 1274-Lng-A-T | 63  | chr15:43247850-43247950 |



**Table S2: SB Insertion regions**

|       |          |          |              |      |                         |
|-------|----------|----------|--------------|------|-------------------------|
| chr15 | 43261750 | 43261850 | 901-Lng-B-T  | 209  | chr15:43261750-43261850 |
| chr15 | 43266850 | 43266950 | 1090-Lng-A-T | 70   | chr15:43266850-43266950 |
| chr15 | 43272550 | 43272650 | 1090-Lng-A-T | 121  | chr15:43272550-43272650 |
| chr15 | 43293550 | 43293650 | 901-Lng-A-T  | 681  | chr15:43293550-43293650 |
| chr15 | 43294250 | 43294350 | 1223-Lng-D-T | 41   | chr15:43294250-43294350 |
| chr15 | 43309450 | 43309550 | 1065-Lng-B-T | 40   | chr15:43309450-43309550 |
| chr15 | 43309550 | 43309650 | 901-Lng-B-T  | 138  | chr15:43309550-43309650 |
| chr15 | 43311950 | 43312050 | 901-Lng-C-T  | 117  | chr15:43311950-43312050 |
| chr15 | 43311950 | 43312050 | 1167-Lng-A-T | 1977 | chr15:43311950-43312050 |
| chr15 | 43330950 | 43331050 | 901-Lng-B-T  | 143  | chr15:43330950-43331050 |
| chr15 | 43378250 | 43378350 | 901-Lng-C-T  | 51   | chr15:43378250-43378350 |
| chr15 | 43383450 | 43383550 | 1065-Lng-A-T | 56   | chr15:43383450-43383550 |
| chr15 | 43508950 | 43509050 | 1065-Lng-B-T | 60   | chr15:43508950-43509050 |
| chr15 | 43512650 | 43512750 | 1065-Lng-A-T | 43   | chr15:43512650-43512750 |
| chr15 | 43512850 | 43512950 | 1004-Lng-A-T | 81   | chr15:43512850-43512950 |
| chr15 | 43521350 | 43521450 | 1223-Lng-D-T | 74   | chr15:43521350-43521450 |
| chr15 | 43525250 | 43525350 | 846-Lng-A-T  | 62   | chr15:43525250-43525350 |
| chr15 | 43535650 | 43535750 | 901-Lng-A-T  | 69   | chr15:43535650-43535750 |
| chr15 | 43565650 | 43565750 | 846-Lng-A-T  | 125  | chr15:43565650-43565750 |
| chr15 | 43583950 | 43584050 | 1004-Lng-A-T | 60   | chr15:43583950-43584050 |
| chr15 | 43600950 | 43601050 | 1065-Lng-B-T | 96   | chr15:43600950-43601050 |
| chr15 | 43631850 | 43631950 | 901-Lng-B-T  | 93   | chr15:43631850-43631950 |
| chr15 | 43639350 | 43639450 | 1223-Lng-D-T | 41   | chr15:43639350-43639450 |
| chr15 | 43642050 | 43642150 | 901-Lng-D-T  | 90   | chr15:43642050-43642150 |
| chr15 | 43645650 | 43645750 | 1065-Lng-A-T | 54   | chr15:43645650-43645750 |
| chr15 | 43647250 | 43647350 | 1065-Lng-A-T | 40   | chr15:43647250-43647350 |
| chr15 | 43657350 | 43657450 | 901-Lng-B-T  | 131  | chr15:43657350-43657450 |
| chr15 | 43657850 | 43657950 | 1065-Lng-A-T | 87   | chr15:43657850-43657950 |
| chr15 | 43676650 | 43676750 | 1065-Lng-B-T | 49   | chr15:43676650-43676750 |
| chr15 | 43685350 | 43685450 | 1065-Lng-B-T | 71   | chr15:43685350-43685450 |
| chr15 | 43694950 | 43695050 | 901-Lng-A-T  | 104  | chr15:43694950-43695050 |
| chr15 | 43696650 | 43696750 | 1065-Lng-B-T | 39   | chr15:43696650-43696750 |
| chr15 | 43727850 | 43727950 | 1004-Lng-A-T | 109  | chr15:43727850-43727950 |
| chr15 | 43731650 | 43731750 | 1188-Lng-A-T | 47   | chr15:43731650-43731750 |
| chr15 | 43760550 | 43760650 | 1065-Lng-B-T | 50   | chr15:43760550-43760650 |
| chr15 | 43766750 | 43766850 | 1065-Lng-C-T | 86   | chr15:43766750-43766850 |
| chr15 | 43769150 | 43769250 | 846-Lng-A-T  | 145  | chr15:43769150-43769250 |
| chr15 | 43823150 | 43823250 | 901-Lng-D-T  | 91   | chr15:43823150-43823250 |
| chr15 | 43827150 | 43827250 | 1072-Lng-A-T | 143  | chr15:43827150-43827250 |
| chr15 | 43828750 | 43828850 | 1065-Lng-B-T | 54   | chr15:43828750-43828850 |
| chr15 | 43836050 | 43836150 | 901-Lng-A-T  | 123  | chr15:43836050-43836150 |
| chr15 | 43836550 | 43836650 | 1065-Lng-B-T | 51   | chr15:43836550-43836650 |
| chr15 | 43880150 | 43880250 | 1223-Lng-D-T | 48   | chr15:43880150-43880250 |
| chr15 | 43891350 | 43891450 | 1090-Lng-A-T | 49   | chr15:43891350-43891450 |
| chr15 | 43892250 | 43892350 | 901-Lng-D-T  | 491  | chr15:43892250-43892350 |
| chr15 | 43915550 | 43915650 | 1152-Lng-A-T | 93   | chr15:43915550-43915650 |

**Table S2: SB Insertion regions**

|       |          |          |              |       |                         |
|-------|----------|----------|--------------|-------|-------------------------|
| chr15 | 43923850 | 43923950 | 1065-Lng-A-T | 60    | chr15:43923850-43923950 |
| chr15 | 43945250 | 43945350 | 901-Lng-C-T  | 136   | chr15:43945250-43945350 |
| chr15 | 43979550 | 43979650 | 1090-Lng-B-T | 702   | chr15:43979550-43979650 |
| chr15 | 43985050 | 43985150 | 1065-Lng-A-T | 126   | chr15:43985050-43985150 |
| chr15 | 43985250 | 43985350 | 1065-Lng-B-T | 73    | chr15:43985250-43985350 |
| chr15 | 43994550 | 43994650 | 846-Lng-A-T  | 92    | chr15:43994550-43994650 |
| chr15 | 43996350 | 43996450 | 1223-Lng-B-T | 233   | chr15:43996350-43996450 |
| chr15 | 44001850 | 44001950 | 846-Lng-A-T  | 361   | chr15:44001850-44001950 |
| chr15 | 44007350 | 44007450 | 1090-Lng-A-T | 107   | chr15:44007350-44007450 |
| chr15 | 44016350 | 44016450 | 1065-Lng-A-T | 47    | chr15:44016350-44016450 |
| chr15 | 44019150 | 44019250 | 1072-Lng-A-T | 176   | chr15:44019150-44019250 |
| chr15 | 44019850 | 44019950 | 1065-Lng-A-T | 39    | chr15:44019850-44019950 |
| chr15 | 44022550 | 44022650 | 1004-Lng-A-T | 57    | chr15:44022550-44022650 |
| chr15 | 44023550 | 44023650 | 901-Lng-D-T  | 488   | chr15:44023550-44023650 |
| chr15 | 44027850 | 44027950 | 901-Lng-B-T  | 132   | chr15:44027850-44027950 |
| chr15 | 44030150 | 44030250 | 901-Lng-C-T  | 47    | chr15:44030150-44030250 |
| chr15 | 44030550 | 44030650 | 901-Lng-B-T  | 140   | chr15:44030550-44030650 |
| chr15 | 44034150 | 44034250 | 1065-Lng-B-T | 40    | chr15:44034150-44034250 |
| chr15 | 44040950 | 44041050 | 1065-Lng-C-T | 1221  | chr15:44040950-44041050 |
| chr15 | 44043450 | 44043550 | 901-Lng-C-T  | 187   | chr15:44043450-44043550 |
| chr15 | 44043850 | 44043950 | 1072-Lng-A-T | 90    | chr15:44043850-44043950 |
| chr15 | 44046850 | 44046950 | 1065-Lng-A-T | 34    | chr15:44046850-44046950 |
| chr15 | 44048150 | 44048250 | 1072-Lng-A-T | 66    | chr15:44048150-44048250 |
| chr15 | 44049950 | 44050050 | 1090-Lng-A-T | 121   | chr15:44049950-44050050 |
| chr15 | 44052550 | 44052650 | 1065-Lng-A-T | 53    | chr15:44052550-44052650 |
| chr15 | 44053450 | 44053550 | 1065-Lng-C-T | 12495 | chr15:44053450-44053550 |
| chr15 | 44061850 | 44061950 | 1090-Lng-A-T | 119   | chr15:44061850-44061950 |
| chr15 | 44062450 | 44062550 | 901-Lng-C-T  | 56    | chr15:44062450-44062550 |
| chr15 | 44063750 | 44063850 | 1065-Lng-A-T | 523   | chr15:44063750-44063850 |
| chr15 | 44066950 | 44067050 | 1065-Lng-A-T | 49    | chr15:44066950-44067050 |
| chr15 | 44067550 | 44067650 | 1065-Lng-A-T | 54    | chr15:44067550-44067650 |
| chr15 | 44070850 | 44070950 | 901-Lng-B-T  | 89    | chr15:44070850-44070950 |
| chr15 | 44072550 | 44072650 | 846-Lng-A-T  | 622   | chr15:44072550-44072650 |
| chr15 | 44072550 | 44072650 | 1090-Lng-A-T | 690   | chr15:44072550-44072650 |
| chr15 | 44087050 | 44087150 | 1223-Lng-B-T | 48    | chr15:44087050-44087150 |
| chr15 | 44093650 | 44093750 | 901-Lng-D-T  | 310   | chr15:44093650-44093750 |
| chr15 | 44116250 | 44116350 | 1004-Lng-A-T | 88    | chr15:44116250-44116350 |
| chr15 | 44137950 | 44138050 | 1090-Lng-A-T | 384   | chr15:44137950-44138050 |
| chr15 | 44153350 | 44153450 | 1090-Lng-A-T | 100   | chr15:44153350-44153450 |
| chr15 | 44160950 | 44161050 | 1065-Lng-A-T | 100   | chr15:44160950-44161050 |
| chr15 | 44169050 | 44169150 | 901-Lng-B-T  | 178   | chr15:44169050-44169150 |
| chr15 | 44211050 | 44211150 | 1004-Lng-A-T | 67    | chr15:44211050-44211150 |
| chr15 | 44212050 | 44212150 | 846-Lng-A-T  | 120   | chr15:44212050-44212150 |
| chr15 | 44212250 | 44212350 | 1004-Lng-A-T | 61    | chr15:44212250-44212350 |
| chr15 | 44219750 | 44219850 | 1090-Lng-B-T | 702   | chr15:44219750-44219850 |
| chr15 | 44227450 | 44227550 | 901-Lng-A-T  | 104   | chr15:44227450-44227550 |

**Table S2: SB Insertion regions**

|       |          |          |              |     |                         |
|-------|----------|----------|--------------|-----|-------------------------|
| chr15 | 44228750 | 44228850 | 1004-Lng-A-T | 77  | chr15:44228750-44228850 |
| chr15 | 44235550 | 44235650 | 1223-Lng-D-T | 41  | chr15:44235550-44235650 |
| chr15 | 44245450 | 44245550 | 901-Lng-A-T  | 89  | chr15:44245450-44245550 |
| chr15 | 44246950 | 44247050 | 1065-Lng-A-T | 239 | chr15:44246950-44247050 |
| chr15 | 44261550 | 44261650 | 901-Lng-A-T  | 68  | chr15:44261550-44261650 |
| chr15 | 44264750 | 44264850 | 901-Lng-A-T  | 79  | chr15:44264750-44264850 |
| chr15 | 44270650 | 44270750 | 1065-Lng-C-T | 93  | chr15:44270650-44270750 |
| chr15 | 44282150 | 44282250 | 1065-Lng-A-T | 93  | chr15:44282150-44282250 |
| chr15 | 44296450 | 44296550 | 901-Lng-A-T  | 70  | chr15:44296450-44296550 |
| chr15 | 44296650 | 44296750 | 901-Lng-B-T  | 156 | chr15:44296650-44296750 |
| chr15 | 44313250 | 44313350 | 1090-Lng-A-T | 74  | chr15:44313250-44313350 |
| chr15 | 44333950 | 44334050 | 1065-Lng-B-T | 46  | chr15:44333950-44334050 |
| chr15 | 44343150 | 44343250 | 1090-Lng-A-T | 63  | chr15:44343150-44343250 |
| chr15 | 44357550 | 44357650 | 1065-Lng-C-T | 108 | chr15:44357550-44357650 |
| chr15 | 44367950 | 44368050 | 1004-Lng-A-T | 736 | chr15:44367950-44368050 |
| chr15 | 44392750 | 44392850 | 1100-Lng-A-T | 87  | chr15:44392750-44392850 |
| chr15 | 44395150 | 44395250 | 901-Lng-D-T  | 404 | chr15:44395150-44395250 |
| chr15 | 44403950 | 44404050 | 1065-Lng-C-T | 100 | chr15:44403950-44404050 |
| chr15 | 44406250 | 44406350 | 1167-Lng-A-T | 65  | chr15:44406250-44406350 |
| chr15 | 44413150 | 44413250 | 846-Lng-A-T  | 169 | chr15:44413150-44413250 |
| chr15 | 44416750 | 44416850 | 1065-Lng-B-T | 50  | chr15:44416750-44416850 |
| chr15 | 44421650 | 44421750 | 1065-Lng-C-T | 70  | chr15:44421650-44421750 |
| chr15 | 44448750 | 44448850 | 846-Lng-A-T  | 100 | chr15:44448750-44448850 |
| chr15 | 44449850 | 44449950 | 1090-Lng-B-T | 297 | chr15:44449850-44449950 |
| chr15 | 44457550 | 44457650 | 1223-Lng-C-T | 111 | chr15:44457550-44457650 |
| chr15 | 44458550 | 44458650 | 901-Lng-B-T  | 362 | chr15:44458550-44458650 |
| chr15 | 44460950 | 44461050 | 901-Lng-D-T  | 376 | chr15:44460950-44461050 |
| chr15 | 44476850 | 44476950 | 1090-Lng-A-T | 76  | chr15:44476850-44476950 |
| chr15 | 44480150 | 44480250 | 1065-Lng-A-T | 57  | chr15:44480150-44480250 |
| chr15 | 44480150 | 44480250 | 1065-Lng-B-T | 141 | chr15:44480150-44480250 |
| chr15 | 44510950 | 44511050 | 1065-Lng-C-T | 61  | chr15:44510950-44511050 |
| chr15 | 44511250 | 44511350 | 1090-Lng-A-T | 63  | chr15:44511250-44511350 |
| chr15 | 44540650 | 44540750 | 846-Lng-A-T  | 66  | chr15:44540650-44540750 |
| chr15 | 44543350 | 44543450 | 1072-Lng-A-T | 100 | chr15:44543350-44543450 |
| chr15 | 44562850 | 44562950 | 901-Lng-C-T  | 106 | chr15:44562850-44562950 |
| chr15 | 44575150 | 44575250 | 1223-Lng-C-T | 72  | chr15:44575150-44575250 |
| chr15 | 44577050 | 44577150 | 901-Lng-B-T  | 214 | chr15:44577050-44577150 |
| chr15 | 44581450 | 44581550 | 1223-Lng-A-T | 162 | chr15:44581450-44581550 |
| chr15 | 44594050 | 44594150 | 1072-Lng-A-T | 53  | chr15:44594050-44594150 |
| chr15 | 44598350 | 44598450 | 1065-Lng-A-T | 45  | chr15:44598350-44598450 |
| chr15 | 44614350 | 44614450 | 1065-Lng-A-T | 38  | chr15:44614350-44614450 |
| chr15 | 44641550 | 44641650 | 901-Lng-A-T  | 77  | chr15:44641550-44641650 |
| chr15 | 44642150 | 44642250 | 1065-Lng-A-T | 42  | chr15:44642150-44642250 |
| chr15 | 44667850 | 44667950 | 1223-Lng-D-T | 40  | chr15:44667850-44667950 |
| chr15 | 44669050 | 44669150 | 1072-Lng-A-T | 130 | chr15:44669050-44669150 |
| chr15 | 44681650 | 44681750 | 1072-Lng-A-T | 111 | chr15:44681650-44681750 |

**Table S2: SB Insertion regions**

|       |          |          |              |     |                         |
|-------|----------|----------|--------------|-----|-------------------------|
| chr15 | 44743150 | 44743250 | 1065-Lng-C-T | 103 | chr15:44743150-44743250 |
| chr15 | 44778250 | 44778350 | 1090-Lng-B-T | 102 | chr15:44778250-44778350 |
| chr15 | 44788750 | 44788850 | 901-Lng-A-T  | 52  | chr15:44788750-44788850 |
| chr15 | 44849450 | 44849550 | 901-Lng-B-T  | 93  | chr15:44849450-44849550 |
| chr15 | 44884150 | 44884250 | 901-Lng-D-T  | 39  | chr15:44884150-44884250 |
| chr15 | 44887150 | 44887250 | 901-Lng-C-T  | 62  | chr15:44887150-44887250 |
| chr15 | 44914050 | 44914150 | 1072-Lng-A-T | 189 | chr15:44914050-44914150 |
| chr15 | 44959050 | 44959150 | 901-Lng-C-T  | 101 | chr15:44959050-44959150 |
| chr15 | 45003350 | 45003450 | 1090-Lng-B-T | 279 | chr15:45003350-45003450 |
| chr15 | 45018350 | 45018450 | 1065-Lng-B-T | 57  | chr15:45018350-45018450 |
| chr15 | 45029750 | 45029850 | 1223-Lng-B-T | 252 | chr15:45029750-45029850 |
| chr15 | 45059350 | 45059450 | 901-Lng-C-T  | 32  | chr15:45059350-45059450 |
| chr15 | 45069050 | 45069150 | 901-Lng-D-T  | 682 | chr15:45069050-45069150 |
| chr15 | 45103250 | 45103350 | 1223-Lng-D-T | 40  | chr15:45103250-45103350 |
| chr15 | 45157850 | 45157950 | 1004-Lng-A-T | 57  | chr15:45157850-45157950 |
| chr15 | 45158650 | 45158750 | 1152-Lng-A-T | 87  | chr15:45158650-45158750 |
| chr15 | 45203050 | 45203150 | 901-Lng-C-T  | 103 | chr15:45203050-45203150 |
| chr15 | 45237450 | 45237550 | 1072-Lng-A-T | 52  | chr15:45237450-45237550 |
| chr15 | 45242350 | 45242450 | 1004-Lng-A-T | 63  | chr15:45242350-45242450 |
| chr15 | 45245750 | 45245850 | 1072-Lng-A-T | 70  | chr15:45245750-45245850 |
| chr15 | 45251650 | 45251750 | 901-Lng-A-T  | 61  | chr15:45251650-45251750 |
| chr15 | 45251950 | 45252050 | 1090-Lng-A-T | 80  | chr15:45251950-45252050 |
| chr15 | 45260050 | 45260150 | 1065-Lng-C-T | 68  | chr15:45260050-45260150 |
| chr15 | 45261350 | 45261450 | 1065-Lng-B-T | 100 | chr15:45261350-45261450 |
| chr15 | 45261950 | 45262050 | 1065-Lng-B-T | 387 | chr15:45261950-45262050 |
| chr15 | 45280150 | 45280250 | 1090-Lng-A-T | 68  | chr15:45280150-45280250 |
| chr15 | 45289150 | 45289250 | 1004-Lng-A-T | 59  | chr15:45289150-45289250 |
| chr15 | 45317050 | 45317150 | 846-Lng-A-T  | 138 | chr15:45317050-45317150 |
| chr15 | 45363950 | 45364050 | 901-Lng-B-T  | 112 | chr15:45363950-45364050 |
| chr15 | 45370150 | 45370250 | 1065-Lng-C-T | 272 | chr15:45370150-45370250 |
| chr15 | 45378350 | 45378450 | 1065-Lng-A-T | 48  | chr15:45378350-45378450 |
| chr15 | 45382350 | 45382450 | 1065-Lng-A-T | 68  | chr15:45382350-45382450 |
| chr15 | 45490750 | 45490850 | 901-Lng-C-T  | 117 | chr15:45490750-45490850 |
| chr15 | 45494850 | 45494950 | 1065-Lng-C-T | 126 | chr15:45494850-45494950 |
| chr15 | 45521950 | 45522050 | 1065-Lng-C-T | 73  | chr15:45521950-45522050 |
| chr15 | 45584950 | 45585050 | 901-Lng-C-T  | 94  | chr15:45584950-45585050 |
| chr15 | 45585850 | 45585950 | 1223-Lng-B-T | 53  | chr15:45585850-45585950 |
| chr15 | 45617850 | 45617950 | 1065-Lng-A-T | 61  | chr15:45617850-45617950 |
| chr15 | 45631450 | 45631550 | 901-Lng-B-T  | 93  | chr15:45631450-45631550 |
| chr15 | 45662850 | 45662950 | 1223-Lng-A-T | 83  | chr15:45662850-45662950 |
| chr15 | 45673150 | 45673250 | 1065-Lng-C-T | 77  | chr15:45673150-45673250 |
| chr15 | 45729550 | 45729650 | 1065-Lng-B-T | 42  | chr15:45729550-45729650 |
| chr15 | 45733350 | 45733450 | 1065-Lng-B-T | 414 | chr15:45733350-45733450 |
| chr15 | 45735550 | 45735650 | 901-Lng-C-T  | 85  | chr15:45735550-45735650 |
| chr15 | 45779850 | 45779950 | 1100-Lng-A-T | 80  | chr15:45779850-45779950 |
| chr15 | 45801650 | 45801750 | 1090-Lng-A-T | 95  | chr15:45801650-45801750 |

**Table S2: SB Insertion regions**

|       |          |          |              |      |                         |
|-------|----------|----------|--------------|------|-------------------------|
| chr15 | 45813550 | 45813650 | 1065-Lng-C-T | 61   | chr15:45813550-45813650 |
| chr15 | 45849850 | 45849950 | 1065-Lng-C-T | 66   | chr15:45849850-45849950 |
| chr15 | 45854950 | 45855050 | 1065-Lng-C-T | 138  | chr15:45854950-45855050 |
| chr15 | 45882850 | 45882950 | 901-Lng-B-T  | 41   | chr15:45882850-45882950 |
| chr15 | 45930550 | 45930650 | 1065-Lng-A-T | 62   | chr15:45930550-45930650 |
| chr15 | 45962350 | 45962450 | 1065-Lng-A-T | 273  | chr15:45962350-45962450 |
| chr15 | 45993550 | 45993650 | 901-Lng-C-T  | 45   | chr15:45993550-45993650 |
| chr15 | 45995950 | 45996050 | 1072-Lng-A-T | 97   | chr15:45995950-45996050 |
| chr15 | 46008750 | 46008850 | 1072-Lng-A-T | 434  | chr15:46008750-46008850 |
| chr15 | 46014150 | 46014250 | 1072-Lng-A-T | 188  | chr15:46014150-46014250 |
| chr15 | 46020250 | 46020350 | 1065-Lng-C-T | 85   | chr15:46020250-46020350 |
| chr15 | 46063350 | 46063450 | 901-Lng-A-T  | 507  | chr15:46063350-46063450 |
| chr15 | 46075150 | 46075250 | 1090-Lng-A-T | 74   | chr15:46075150-46075250 |
| chr15 | 46115750 | 46115850 | 1065-Lng-A-T | 98   | chr15:46115750-46115850 |
| chr15 | 46117750 | 46117850 | 1072-Lng-A-T | 200  | chr15:46117750-46117850 |
| chr15 | 46160650 | 46160750 | 1004-Lng-A-T | 98   | chr15:46160650-46160750 |
| chr15 | 46183050 | 46183150 | 1065-Lng-A-T | 75   | chr15:46183050-46183150 |
| chr15 | 46229450 | 46229550 | 901-Lng-B-T  | 185  | chr15:46229450-46229550 |
| chr15 | 46255950 | 46256050 | 1065-Lng-B-T | 42   | chr15:46255950-46256050 |
| chr15 | 46261450 | 46261550 | 901-Lng-D-T  | 224  | chr15:46261450-46261550 |
| chr15 | 46265450 | 46265550 | 1065-Lng-C-T | 77   | chr15:46265450-46265550 |
| chr15 | 46287250 | 46287350 | 1065-Lng-C-T | 62   | chr15:46287250-46287350 |
| chr15 | 46287950 | 46288050 | 1065-Lng-B-T | 54   | chr15:46287950-46288050 |
| chr15 | 46302750 | 46302850 | 901-Lng-C-T  | 89   | chr15:46302750-46302850 |
| chr15 | 46307950 | 46308050 | 901-Lng-C-T  | 389  | chr15:46307950-46308050 |
| chr15 | 46309450 | 46309550 | 901-Lng-C-T  | 77   | chr15:46309450-46309550 |
| chr15 | 46343350 | 46343450 | 1065-Lng-C-T | 71   | chr15:46343350-46343450 |
| chr15 | 46343550 | 46343650 | 1072-Lng-A-T | 49   | chr15:46343550-46343650 |
| chr15 | 46344550 | 46344650 | 846-Lng-A-T  | 79   | chr15:46344550-46344650 |
| chr15 | 46345850 | 46345950 | 1090-Lng-A-T | 78   | chr15:46345850-46345950 |
| chr15 | 46389650 | 46389750 | 901-Lng-A-T  | 68   | chr15:46389650-46389750 |
| chr15 | 46403450 | 46403550 | 901-Lng-A-T  | 51   | chr15:46403450-46403550 |
| chr15 | 46440950 | 46441050 | 1065-Lng-A-T | 577  | chr15:46440950-46441050 |
| chr15 | 46444950 | 46445050 | 1100-Lng-A-T | 52   | chr15:46444950-46445050 |
| chr15 | 46449150 | 46449250 | 1072-Lng-A-T | 48   | chr15:46449150-46449250 |
| chr15 | 46490350 | 46490450 | 1223-Lng-B-T | 179  | chr15:46490350-46490450 |
| chr15 | 46505850 | 46505950 | 1065-Lng-A-T | 120  | chr15:46505850-46505950 |
| chr15 | 46576450 | 46576550 | 1065-Lng-A-T | 36   | chr15:46576450-46576550 |
| chr15 | 46576550 | 46576650 | 901-Lng-A-T  | 374  | chr15:46576550-46576650 |
| chr15 | 46594950 | 46595050 | 901-Lng-C-T  | 64   | chr15:46594950-46595050 |
| chr15 | 46603950 | 46604050 | 1072-Lng-A-T | 58   | chr15:46603950-46604050 |
| chr15 | 46644950 | 46645050 | 1090-Lng-A-T | 85   | chr15:46644950-46645050 |
| chr15 | 46681550 | 46681650 | 1065-Lng-A-T | 60   | chr15:46681550-46681650 |
| chr15 | 46688550 | 46688650 | 1065-Lng-C-T | 76   | chr15:46688550-46688650 |
| chr15 | 46689850 | 46689950 | 1223-Lng-B-T | 50   | chr15:46689850-46689950 |
| chr15 | 46740550 | 46740650 | 1090-Lng-A-T | 1038 | chr15:46740550-46740650 |

**Table S2: SB Insertion regions**

|       |          |          |              |      |                         |
|-------|----------|----------|--------------|------|-------------------------|
| chr15 | 46748550 | 46748650 | 1100-Lng-A-T | 111  | chr15:46748550-46748650 |
| chr15 | 46784550 | 46784650 | 1065-Lng-B-T | 95   | chr15:46784550-46784650 |
| chr15 | 46787650 | 46787750 | 1004-Lng-A-T | 103  | chr15:46787650-46787750 |
| chr15 | 46806150 | 46806250 | 1065-Lng-C-T | 87   | chr15:46806150-46806250 |
| chr15 | 46820850 | 46820950 | 1004-Lng-A-T | 50   | chr15:46820850-46820950 |
| chr15 | 46820950 | 46821050 | 1065-Lng-B-T | 42   | chr15:46820950-46821050 |
| chr15 | 46826250 | 46826350 | 1072-Lng-A-T | 134  | chr15:46826250-46826350 |
| chr15 | 46844350 | 46844450 | 901-Lng-C-T  | 39   | chr15:46844350-46844450 |
| chr15 | 46844350 | 46844450 | 901-Lng-C-T  | 70   | chr15:46844350-46844450 |
| chr15 | 46880850 | 46880950 | 1090-Lng-B-T | 435  | chr15:46880850-46880950 |
| chr15 | 46895650 | 46895750 | 1223-Lng-A-T | 1110 | chr15:46895650-46895750 |
| chr15 | 46966050 | 46966150 | 901-Lng-D-T  | 160  | chr15:46966050-46966150 |
| chr15 | 46980450 | 46980550 | 1065-Lng-A-T | 62   | chr15:46980450-46980550 |
| chr15 | 46997050 | 46997150 | 1090-Lng-B-T | 112  | chr15:46997050-46997150 |
| chr15 | 47001550 | 47001650 | 1065-Lng-C-T | 81   | chr15:47001550-47001650 |
| chr15 | 47034650 | 47034750 | 1100-Lng-A-T | 181  | chr15:47034650-47034750 |
| chr15 | 47044350 | 47044450 | 1090-Lng-A-T | 72   | chr15:47044350-47044450 |
| chr15 | 47071650 | 47071750 | 1004-Lng-A-T | 110  | chr15:47071650-47071750 |
| chr15 | 47080850 | 47080950 | 846-Lng-A-T  | 217  | chr15:47080850-47080950 |
| chr15 | 47107050 | 47107150 | 1065-Lng-C-T | 62   | chr15:47107050-47107150 |
| chr15 | 47151750 | 47151850 | 1065-Lng-A-T | 39   | chr15:47151750-47151850 |
| chr15 | 47214150 | 47214250 | 846-Lng-A-T  | 1136 | chr15:47214150-47214250 |
| chr15 | 47230250 | 47230350 | 1065-Lng-A-T | 78   | chr15:47230250-47230350 |
| chr15 | 47231050 | 47231150 | 1090-Lng-A-T | 47   | chr15:47231050-47231150 |
| chr15 | 47234750 | 47234850 | 1072-Lng-A-T | 245  | chr15:47234750-47234850 |
| chr15 | 47244450 | 47244550 | 1065-Lng-B-T | 52   | chr15:47244450-47244550 |
| chr15 | 47255250 | 47255350 | 1072-Lng-A-T | 182  | chr15:47255250-47255350 |
| chr15 | 47295550 | 47295650 | 846-Lng-A-T  | 820  | chr15:47295550-47295650 |
| chr15 | 47297050 | 47297150 | 901-Lng-A-T  | 91   | chr15:47297050-47297150 |
| chr15 | 47302550 | 47302650 | 1065-Lng-B-T | 71   | chr15:47302550-47302650 |
| chr15 | 47307850 | 47307950 | 901-Lng-C-T  | 39   | chr15:47307850-47307950 |
| chr15 | 47317450 | 47317550 | 901-Lng-B-T  | 188  | chr15:47317450-47317550 |
| chr15 | 47332150 | 47332250 | 846-Lng-A-T  | 172  | chr15:47332150-47332250 |
| chr15 | 47351250 | 47351350 | 1072-Lng-A-T | 118  | chr15:47351250-47351350 |
| chr15 | 47358350 | 47358450 | 1152-Lng-A-T | 73   | chr15:47358350-47358450 |
| chr15 | 47366550 | 47366650 | 1072-Lng-A-T | 268  | chr15:47366550-47366650 |
| chr15 | 47461450 | 47461550 | 846-Lng-A-T  | 126  | chr15:47461450-47461550 |
| chr15 | 47510650 | 47510750 | 901-Lng-C-T  | 162  | chr15:47510650-47510750 |
| chr15 | 47533550 | 47533650 | 1065-Lng-B-T | 47   | chr15:47533550-47533650 |
| chr15 | 47554750 | 47554850 | 846-Lng-A-T  | 121  | chr15:47554750-47554850 |
| chr15 | 47560350 | 47560450 | 1072-Lng-A-T | 111  | chr15:47560350-47560450 |
| chr15 | 47560750 | 47560850 | 1065-Lng-B-T | 44   | chr15:47560750-47560850 |
| chr15 | 47562350 | 47562450 | 1072-Lng-A-T | 57   | chr15:47562350-47562450 |
| chr15 | 47566650 | 47566750 | 846-Lng-A-T  | 62   | chr15:47566650-47566750 |
| chr15 | 47578550 | 47578650 | 846-Lng-A-T  | 80   | chr15:47578550-47578650 |
| chr15 | 47596150 | 47596250 | 901-Lng-A-T  | 140  | chr15:47596150-47596250 |

**Table S2: SB Insertion regions**

|       |          |          |              |     |                         |
|-------|----------|----------|--------------|-----|-------------------------|
| chr15 | 47599050 | 47599150 | 1065-Lng-B-T | 53  | chr15:47599050-47599150 |
| chr15 | 47604050 | 47604150 | 1152-Lng-A-T | 85  | chr15:47604050-47604150 |
| chr15 | 47615750 | 47615850 | 1065-Lng-A-T | 162 | chr15:47615750-47615850 |
| chr15 | 47616650 | 47616750 | 1065-Lng-A-T | 99  | chr15:47616650-47616750 |
| chr15 | 47641550 | 47641650 | 901-Lng-A-T  | 127 | chr15:47641550-47641650 |
| chr15 | 47642050 | 47642150 | 1223-Lng-B-T | 79  | chr15:47642050-47642150 |
| chr15 | 47669050 | 47669150 | 1090-Lng-A-T | 45  | chr15:47669050-47669150 |
| chr15 | 47679250 | 47679350 | 1274-Lng-A-T | 56  | chr15:47679250-47679350 |
| chr15 | 47682950 | 47683050 | 1090-Lng-B-T | 92  | chr15:47682950-47683050 |
| chr15 | 47709550 | 47709650 | 1065-Lng-A-T | 51  | chr15:47709550-47709650 |
| chr15 | 47727950 | 47728050 | 1152-Lng-A-T | 53  | chr15:47727950-47728050 |
| chr15 | 47755750 | 47755850 | 1065-Lng-A-T | 78  | chr15:47755750-47755850 |
| chr15 | 47807550 | 47807650 | 1004-Lng-A-T | 73  | chr15:47807550-47807650 |
| chr15 | 47816950 | 47817050 | 1065-Lng-B-T | 45  | chr15:47816950-47817050 |
| chr15 | 47817550 | 47817650 | 1072-Lng-A-T | 55  | chr15:47817550-47817650 |
| chr15 | 47817950 | 47818050 | 1065-Lng-C-T | 73  | chr15:47817950-47818050 |
| chr15 | 47835350 | 47835450 | 1065-Lng-A-T | 126 | chr15:47835350-47835450 |
| chr15 | 47836850 | 47836950 | 1072-Lng-A-T | 78  | chr15:47836850-47836950 |
| chr15 | 47856150 | 47856250 | 1065-Lng-B-T | 47  | chr15:47856150-47856250 |
| chr15 | 47872550 | 47872650 | 1065-Lng-B-T | 65  | chr15:47872550-47872650 |
| chr15 | 47884050 | 47884150 | 1065-Lng-B-T | 56  | chr15:47884050-47884150 |
| chr15 | 47893950 | 47894050 | 1090-Lng-B-T | 522 | chr15:47893950-47894050 |
| chr15 | 47902950 | 47903050 | 1004-Lng-A-T | 73  | chr15:47902950-47903050 |
| chr15 | 47921950 | 47922050 | 1065-Lng-B-T | 78  | chr15:47921950-47922050 |
| chr15 | 47925450 | 47925550 | 1065-Lng-C-T | 78  | chr15:47925450-47925550 |
| chr15 | 47930450 | 47930550 | 901-Lng-A-T  | 121 | chr15:47930450-47930550 |
| chr15 | 47950250 | 47950350 | 1223-Lng-A-T | 177 | chr15:47950250-47950350 |
| chr15 | 47995950 | 47996050 | 1090-Lng-A-T | 106 | chr15:47995950-47996050 |
| chr15 | 48003250 | 48003350 | 1065-Lng-B-T | 48  | chr15:48003250-48003350 |
| chr15 | 48062550 | 48062650 | 846-Lng-A-T  | 44  | chr15:48062550-48062650 |
| chr15 | 48068250 | 48068350 | 901-Lng-C-T  | 74  | chr15:48068250-48068350 |
| chr15 | 48121550 | 48121650 | 1004-Lng-A-T | 56  | chr15:48121550-48121650 |
| chr15 | 48123050 | 48123150 | 1065-Lng-B-T | 55  | chr15:48123050-48123150 |
| chr15 | 48218350 | 48218450 | 901-Lng-D-T  | 590 | chr15:48218350-48218450 |
| chr15 | 48263950 | 48264050 | 1065-Lng-B-T | 58  | chr15:48263950-48264050 |
| chr15 | 48270550 | 48270650 | 1065-Lng-B-T | 57  | chr15:48270550-48270650 |
| chr15 | 48280650 | 48280750 | 1065-Lng-C-T | 95  | chr15:48280650-48280750 |
| chr15 | 48294350 | 48294450 | 1100-Lng-A-T | 92  | chr15:48294350-48294450 |
| chr15 | 48294950 | 48295050 | 1065-Lng-C-T | 119 | chr15:48294950-48295050 |
| chr15 | 48308050 | 48308150 | 1065-Lng-A-T | 104 | chr15:48308050-48308150 |
| chr15 | 48308450 | 48308550 | 1152-Lng-A-T | 99  | chr15:48308450-48308550 |
| chr15 | 48318750 | 48318850 | 901-Lng-A-T  | 52  | chr15:48318750-48318850 |
| chr15 | 48327750 | 48327850 | 901-Lng-B-T  | 106 | chr15:48327750-48327850 |
| chr15 | 48409750 | 48409850 | 1223-Lng-A-T | 81  | chr15:48409750-48409850 |
| chr15 | 48431850 | 48431950 | 901-Lng-A-T  | 55  | chr15:48431850-48431950 |
| chr15 | 48457550 | 48457650 | 1065-Lng-C-T | 72  | chr15:48457550-48457650 |

**Table S2: SB Insertion regions**

|       |          |          |              |      |                         |
|-------|----------|----------|--------------|------|-------------------------|
| chr15 | 48458250 | 48458350 | 1065-Lng-C-T | 63   | chr15:48458250-48458350 |
| chr15 | 48509250 | 48509350 | 846-Lng-A-T  | 61   | chr15:48509250-48509350 |
| chr15 | 48555650 | 48555750 | 901-Lng-D-T  | 140  | chr15:48555650-48555750 |
| chr15 | 48557850 | 48557950 | 1152-Lng-A-T | 39   | chr15:48557850-48557950 |
| chr15 | 48561850 | 48561950 | 1167-Lng-A-T | 48   | chr15:48561850-48561950 |
| chr15 | 48581950 | 48582050 | 1065-Lng-C-T | 1971 | chr15:48581950-48582050 |
| chr15 | 48582550 | 48582650 | 1065-Lng-A-T | 187  | chr15:48582550-48582650 |
| chr15 | 48591650 | 48591750 | 901-Lng-B-T  | 147  | chr15:48591650-48591750 |
| chr15 | 48602250 | 48602350 | 901-Lng-A-T  | 97   | chr15:48602250-48602350 |
| chr15 | 48605250 | 48605350 | 1152-Lng-A-T | 38   | chr15:48605250-48605350 |
| chr15 | 48609050 | 48609150 | 1065-Lng-B-T | 39   | chr15:48609050-48609150 |
| chr15 | 48635150 | 48635250 | 1065-Lng-B-T | 51   | chr15:48635150-48635250 |
| chr15 | 48657250 | 48657350 | 1090-Lng-A-T | 1171 | chr15:48657250-48657350 |
| chr15 | 48664850 | 48664950 | 1167-Lng-A-T | 73   | chr15:48664850-48664950 |
| chr15 | 48795650 | 48795750 | 1065-Lng-B-T | 47   | chr15:48795650-48795750 |
| chr15 | 48796150 | 48796250 | 1090-Lng-A-T | 53   | chr15:48796150-48796250 |
| chr15 | 48837850 | 48837950 | 1152-Lng-A-T | 79   | chr15:48837850-48837950 |
| chr15 | 48838750 | 48838850 | 1167-Lng-A-T | 73   | chr15:48838750-48838850 |
| chr15 | 48870450 | 48870550 | 1065-Lng-C-T | 554  | chr15:48870450-48870550 |
| chr15 | 48878450 | 48878550 | 1152-Lng-A-T | 42   | chr15:48878450-48878550 |
| chr15 | 48909450 | 48909550 | 1090-Lng-A-T | 51   | chr15:48909450-48909550 |
| chr15 | 48913850 | 48913950 | 1065-Lng-A-T | 48   | chr15:48913850-48913950 |
| chr15 | 48949250 | 48949350 | 1004-Lng-A-T | 61   | chr15:48949250-48949350 |
| chr15 | 48954850 | 48954950 | 1004-Lng-A-T | 976  | chr15:48954850-48954950 |
| chr15 | 48960450 | 48960550 | 846-Lng-A-T  | 275  | chr15:48960450-48960550 |
| chr15 | 48965150 | 48965250 | 1072-Lng-A-T | 69   | chr15:48965150-48965250 |
| chr15 | 48969650 | 48969750 | 1065-Lng-B-T | 53   | chr15:48969650-48969750 |
| chr15 | 48971450 | 48971550 | 1072-Lng-A-T | 55   | chr15:48971450-48971550 |
| chr15 | 49013250 | 49013350 | 1065-Lng-C-T | 85   | chr15:49013250-49013350 |
| chr15 | 49037350 | 49037450 | 1100-Lng-A-T | 53   | chr15:49037350-49037450 |
| chr15 | 49095550 | 49095650 | 1004-Lng-A-T | 101  | chr15:49095550-49095650 |
| chr15 | 49102750 | 49102850 | 1090-Lng-A-T | 55   | chr15:49102750-49102850 |
| chr15 | 49109150 | 49109250 | 901-Lng-D-T  | 115  | chr15:49109150-49109250 |
| chr15 | 49113150 | 49113250 | 1065-Lng-A-T | 82   | chr15:49113150-49113250 |
| chr15 | 49166850 | 49166950 | 1090-Lng-A-T | 49   | chr15:49166850-49166950 |
| chr15 | 49211450 | 49211550 | 901-Lng-C-T  | 43   | chr15:49211450-49211550 |
| chr15 | 49219550 | 49219650 | 1090-Lng-A-T | 52   | chr15:49219550-49219650 |
| chr15 | 49222550 | 49222650 | 846-Lng-A-T  | 164  | chr15:49222550-49222650 |
| chr15 | 49256050 | 49256150 | 1223-Lng-A-T | 145  | chr15:49256050-49256150 |
| chr15 | 49256950 | 49257050 | 1151-Lng-A-T | 354  | chr15:49256950-49257050 |
| chr15 | 49259350 | 49259450 | 1072-Lng-A-T | 59   | chr15:49259350-49259450 |
| chr15 | 49267950 | 49268050 | 1223-Lng-B-T | 48   | chr15:49267950-49268050 |
| chr15 | 49274150 | 49274250 | 1065-Lng-B-T | 43   | chr15:49274150-49274250 |
| chr15 | 49280350 | 49280450 | 901-Lng-A-T  | 478  | chr15:49280350-49280450 |
| chr15 | 49328250 | 49328350 | 1065-Lng-C-T | 116  | chr15:49328250-49328350 |
| chr15 | 49339950 | 49340050 | 1152-Lng-A-T | 105  | chr15:49339950-49340050 |



**Table S2: SB Insertion regions**

|       |          |          |              |     |                         |
|-------|----------|----------|--------------|-----|-------------------------|
| chr15 | 49341650 | 49341750 | 901-Lng-B-T  | 188 | chr15:49341650-49341750 |
| chr15 | 49372550 | 49372650 | 1072-Lng-A-T | 99  | chr15:49372550-49372650 |
| chr15 | 49382550 | 49382650 | 1167-Lng-A-T | 167 | chr15:49382550-49382650 |
| chr15 | 49401750 | 49401850 | 1065-Lng-A-T | 37  | chr15:49401750-49401850 |
| chr15 | 49411750 | 49411850 | 1065-Lng-B-T | 63  | chr15:49411750-49411850 |
| chr15 | 49413050 | 49413150 | 901-Lng-B-T  | 74  | chr15:49413050-49413150 |
| chr15 | 49468750 | 49468850 | 1065-Lng-B-T | 97  | chr15:49468750-49468850 |
| chr15 | 49481750 | 49481850 | 846-Lng-A-T  | 163 | chr15:49481750-49481850 |
| chr15 | 49496350 | 49496450 | 1065-Lng-A-T | 73  | chr15:49496350-49496450 |
| chr15 | 49510750 | 49510850 | 1072-Lng-A-T | 57  | chr15:49510750-49510850 |
| chr15 | 49512950 | 49513050 | 1065-Lng-A-T | 98  | chr15:49512950-49513050 |
| chr15 | 49513050 | 49513150 | 1072-Lng-A-T | 174 | chr15:49513050-49513150 |
| chr15 | 49520250 | 49520350 | 901-Lng-A-T  | 95  | chr15:49520250-49520350 |
| chr15 | 49551650 | 49551750 | 901-Lng-A-T  | 97  | chr15:49551650-49551750 |
| chr15 | 49573450 | 49573550 | 901-Lng-A-T  | 82  | chr15:49573450-49573550 |
| chr15 | 49584450 | 49584550 | 1065-Lng-B-T | 74  | chr15:49584450-49584550 |
| chr15 | 49586050 | 49586150 | 846-Lng-A-T  | 98  | chr15:49586050-49586150 |
| chr15 | 49600950 | 49601050 | 1065-Lng-B-T | 84  | chr15:49600950-49601050 |
| chr15 | 49604250 | 49604350 | 1072-Lng-A-T | 99  | chr15:49604250-49604350 |
| chr15 | 49664050 | 49664150 | 1065-Lng-B-T | 57  | chr15:49664050-49664150 |
| chr15 | 49668250 | 49668350 | 1072-Lng-A-T | 88  | chr15:49668250-49668350 |
| chr15 | 49682750 | 49682850 | 901-Lng-A-T  | 67  | chr15:49682750-49682850 |
| chr15 | 49697150 | 49697250 | 1072-Lng-A-T | 335 | chr15:49697150-49697250 |
| chr15 | 49697550 | 49697650 | 1072-Lng-A-T | 177 | chr15:49697550-49697650 |
| chr15 | 49731650 | 49731750 | 1004-Lng-A-T | 97  | chr15:49731650-49731750 |
| chr15 | 49770950 | 49771050 | 1065-Lng-B-T | 98  | chr15:49770950-49771050 |
| chr15 | 49819350 | 49819450 | 1065-Lng-A-T | 66  | chr15:49819350-49819450 |
| chr15 | 49843450 | 49843550 | 1065-Lng-B-T | 53  | chr15:49843450-49843550 |
| chr15 | 49848950 | 49849050 | 1065-Lng-B-T | 67  | chr15:49848950-49849050 |
| chr15 | 49859950 | 49860050 | 1065-Lng-B-T | 336 | chr15:49859950-49860050 |
| chr15 | 49886050 | 49886150 | 1072-Lng-A-T | 110 | chr15:49886050-49886150 |
| chr15 | 49911150 | 49911250 | 901-Lng-D-T  | 276 | chr15:49911150-49911250 |
| chr15 | 49914650 | 49914750 | 1072-Lng-A-T | 430 | chr15:49914650-49914750 |
| chr15 | 49932550 | 49932650 | 901-Lng-C-T  | 68  | chr15:49932550-49932650 |
| chr15 | 49932550 | 49932650 | 1065-Lng-B-T | 66  | chr15:49932550-49932650 |
| chr15 | 49937850 | 49937950 | 1072-Lng-A-T | 162 | chr15:49937850-49937950 |
| chr15 | 49938750 | 49938850 | 1065-Lng-C-T | 83  | chr15:49938750-49938850 |
| chr15 | 49998150 | 49998250 | 1223-Lng-C-T | 49  | chr15:49998150-49998250 |
| chr15 | 50022850 | 50022950 | 1004-Lng-A-T | 63  | chr15:50022850-50022950 |
| chr15 | 50050450 | 50050550 | 1065-Lng-C-T | 105 | chr15:50050450-50050550 |
| chr15 | 50051250 | 50051350 | 1065-Lng-B-T | 101 | chr15:50051250-50051350 |
| chr15 | 50055450 | 50055550 | 901-Lng-C-T  | 59  | chr15:50055450-50055550 |
| chr15 | 50060550 | 50060650 | 901-Lng-D-T  | 330 | chr15:50060550-50060650 |
| chr15 | 50089450 | 50089550 | 1065-Lng-B-T | 48  | chr15:50089450-50089550 |
| chr15 | 50095650 | 50095750 | 1065-Lng-C-T | 131 | chr15:50095650-50095750 |
| chr15 | 50138250 | 50138350 | 1065-Lng-C-T | 99  | chr15:50138250-50138350 |

**Table S2: SB Insertion regions**

|       |          |          |              |      |                         |
|-------|----------|----------|--------------|------|-------------------------|
| chr15 | 50141550 | 50141650 | 1072-Lng-A-T | 76   | chr15:50141550-50141650 |
| chr15 | 50214150 | 50214250 | 1072-Lng-A-T | 64   | chr15:50214150-50214250 |
| chr15 | 50240150 | 50240250 | 1065-Lng-A-T | 92   | chr15:50240150-50240250 |
| chr15 | 50246450 | 50246550 | 1072-Lng-A-T | 63   | chr15:50246450-50246550 |
| chr15 | 50276350 | 50276450 | 901-Lng-C-T  | 31   | chr15:50276350-50276450 |
| chr15 | 50372450 | 50372550 | 1065-Lng-A-T | 51   | chr15:50372450-50372550 |
| chr15 | 50379650 | 50379750 | 1065-Lng-C-T | 122  | chr15:50379650-50379750 |
| chr15 | 50439850 | 50439950 | 1072-Lng-A-T | 58   | chr15:50439850-50439950 |
| chr15 | 50487950 | 50488050 | 1223-Lng-B-T | 57   | chr15:50487950-50488050 |
| chr15 | 50497250 | 50497350 | 1090-Lng-A-T | 59   | chr15:50497250-50497350 |
| chr15 | 50499850 | 50499950 | 901-Lng-A-T  | 392  | chr15:50499850-50499950 |
| chr15 | 50500050 | 50500150 | 1065-Lng-B-T | 65   | chr15:50500050-50500150 |
| chr15 | 50505150 | 50505250 | 1065-Lng-A-T | 130  | chr15:50505150-50505250 |
| chr15 | 50506450 | 50506550 | 1167-Lng-A-T | 66   | chr15:50506450-50506550 |
| chr15 | 50517550 | 50517650 | 1223-Lng-C-T | 44   | chr15:50517550-50517650 |
| chr15 | 50518350 | 50518450 | 1090-Lng-A-T | 1287 | chr15:50518350-50518450 |
| chr15 | 50521150 | 50521250 | 901-Lng-B-T  | 71   | chr15:50521150-50521250 |
| chr15 | 50574950 | 50575050 | 1274-Lng-A-T | 70   | chr15:50574950-50575050 |
| chr15 | 50577450 | 50577550 | 1072-Lng-A-T | 72   | chr15:50577450-50577550 |
| chr15 | 50589050 | 50589150 | 901-Lng-C-T  | 31   | chr15:50589050-50589150 |
| chr15 | 50590850 | 50590950 | 1065-Lng-C-T | 105  | chr15:50590850-50590950 |
| chr15 | 50595750 | 50595850 | 901-Lng-C-T  | 92   | chr15:50595750-50595850 |
| chr15 | 50610450 | 50610550 | 901-Lng-D-T  | 324  | chr15:50610450-50610550 |
| chr15 | 50612850 | 50612950 | 1065-Lng-A-T | 64   | chr15:50612850-50612950 |
| chr15 | 50615950 | 50616050 | 1223-Lng-A-T | 83   | chr15:50615950-50616050 |
| chr15 | 50617650 | 50617750 | 901-Lng-D-T  | 83   | chr15:50617650-50617750 |
| chr15 | 50618050 | 50618150 | 901-Lng-D-T  | 177  | chr15:50618050-50618150 |
| chr15 | 50631850 | 50631950 | 1274-Lng-A-T | 62   | chr15:50631850-50631950 |
| chr15 | 50663650 | 50663750 | 846-Lng-A-T  | 64   | chr15:50663650-50663750 |
| chr15 | 50674650 | 50674750 | 1223-Lng-D-T | 43   | chr15:50674650-50674750 |
| chr15 | 50707950 | 50708050 | 1065-Lng-B-T | 76   | chr15:50707950-50708050 |
| chr15 | 50722850 | 50722950 | 901-Lng-A-T  | 77   | chr15:50722850-50722950 |
| chr15 | 50723050 | 50723150 | 846-Lng-A-T  | 92   | chr15:50723050-50723150 |
| chr15 | 50731650 | 50731750 | 1223-Lng-B-T | 200  | chr15:50731650-50731750 |
| chr15 | 50745650 | 50745750 | 1090-Lng-A-T | 44   | chr15:50745650-50745750 |
| chr15 | 50762750 | 50762850 | 901-Lng-A-T  | 66   | chr15:50762750-50762850 |
| chr15 | 50776250 | 50776350 | 1065-Lng-C-T | 105  | chr15:50776250-50776350 |
| chr15 | 50812650 | 50812750 | 901-Lng-D-T  | 510  | chr15:50812650-50812750 |
| chr15 | 50821850 | 50821950 | 1065-Lng-A-T | 80   | chr15:50821850-50821950 |
| chr15 | 50828450 | 50828550 | 1152-Lng-A-T | 73   | chr15:50828450-50828550 |
| chr15 | 50830850 | 50830950 | 1065-Lng-C-T | 69   | chr15:50830850-50830950 |
| chr15 | 50841350 | 50841450 | 1223-Lng-A-T | 799  | chr15:50841350-50841450 |
| chr15 | 50889150 | 50889250 | 1167-Lng-A-T | 84   | chr15:50889150-50889250 |
| chr15 | 50936250 | 50936350 | 1223-Lng-B-T | 105  | chr15:50936250-50936350 |
| chr15 | 50956350 | 50956450 | 901-Lng-A-T  | 147  | chr15:50956350-50956450 |
| chr15 | 50975250 | 50975350 | 901-Lng-A-T  | 56   | chr15:50975250-50975350 |

**Table S2: SB Insertion regions**

|       |          |          |              |      |                         |
|-------|----------|----------|--------------|------|-------------------------|
| chr15 | 51018050 | 51018150 | 1004-Lng-A-T | 52   | chr15:51018050-51018150 |
| chr15 | 51068950 | 51069050 | 901-Lng-B-T  | 153  | chr15:51068950-51069050 |
| chr15 | 51081550 | 51081650 | 1090-Lng-A-T | 56   | chr15:51081550-51081650 |
| chr15 | 51140350 | 51140450 | 1065-Lng-C-T | 69   | chr15:51140350-51140450 |
| chr15 | 51148650 | 51148750 | 1167-Lng-A-T | 72   | chr15:51148650-51148750 |
| chr15 | 51184250 | 51184350 | 1090-Lng-A-T | 44   | chr15:51184250-51184350 |
| chr15 | 51214250 | 51214350 | 901-Lng-B-T  | 99   | chr15:51214250-51214350 |
| chr15 | 51223350 | 51223450 | 846-Lng-A-T  | 114  | chr15:51223350-51223450 |
| chr15 | 51234550 | 51234650 | 901-Lng-A-T  | 73   | chr15:51234550-51234650 |
| chr15 | 51273850 | 51273950 | 1065-Lng-C-T | 1218 | chr15:51273850-51273950 |
| chr15 | 51304750 | 51304850 | 1072-Lng-A-T | 80   | chr15:51304750-51304850 |
| chr15 | 51390150 | 51390250 | 1151-Lng-A-T | 186  | chr15:51390150-51390250 |
| chr15 | 51413250 | 51413350 | 901-Lng-C-T  | 314  | chr15:51413250-51413350 |
| chr15 | 51414450 | 51414550 | 1223-Lng-B-T | 36   | chr15:51414450-51414550 |
| chr15 | 51422550 | 51422650 | 1072-Lng-A-T | 4308 | chr15:51422550-51422650 |
| chr15 | 51469550 | 51469650 | 901-Lng-A-T  | 68   | chr15:51469550-51469650 |
| chr15 | 51509850 | 51509950 | 1223-Lng-C-T | 121  | chr15:51509850-51509950 |
| chr15 | 51529350 | 51529450 | 1223-Lng-A-T | 138  | chr15:51529350-51529450 |
| chr15 | 51531950 | 51532050 | 1072-Lng-A-T | 92   | chr15:51531950-51532050 |
| chr15 | 51560150 | 51560250 | 901-Lng-B-T  | 222  | chr15:51560150-51560250 |
| chr15 | 51576050 | 51576150 | 1004-Lng-A-T | 68   | chr15:51576050-51576150 |
| chr15 | 51616350 | 51616450 | 1090-Lng-A-T | 606  | chr15:51616350-51616450 |
| chr15 | 51625750 | 51625850 | 1223-Lng-C-T | 117  | chr15:51625750-51625850 |
| chr15 | 51631350 | 51631450 | 901-Lng-D-T  | 89   | chr15:51631350-51631450 |
| chr15 | 51631350 | 51631450 | 1223-Lng-D-T | 150  | chr15:51631350-51631450 |
| chr15 | 51631850 | 51631950 | 1090-Lng-B-T | 654  | chr15:51631850-51631950 |
| chr15 | 51632350 | 51632450 | 1065-Lng-C-T | 66   | chr15:51632350-51632450 |
| chr15 | 51638550 | 51638650 | 901-Lng-A-T  | 346  | chr15:51638550-51638650 |
| chr15 | 51638850 | 51638950 | 1090-Lng-A-T | 70   | chr15:51638850-51638950 |
| chr15 | 51641750 | 51641850 | 1100-Lng-A-T | 126  | chr15:51641750-51641850 |
| chr15 | 51642950 | 51643050 | 1090-Lng-A-T | 74   | chr15:51642950-51643050 |
| chr15 | 51643450 | 51643550 | 901-Lng-D-T  | 40   | chr15:51643450-51643550 |
| chr15 | 51645650 | 51645750 | 1223-Lng-C-T | 98   | chr15:51645650-51645750 |
| chr15 | 51646850 | 51646950 | 1223-Lng-C-T | 49   | chr15:51646850-51646950 |
| chr15 | 51647250 | 51647350 | 1223-Lng-C-T | 668  | chr15:51647250-51647350 |
| chr15 | 51667950 | 51668050 | 901-Lng-B-T  | 70   | chr15:51667950-51668050 |
| chr15 | 51682950 | 51683050 | 1065-Lng-A-T | 97   | chr15:51682950-51683050 |
| chr15 | 51689450 | 51689550 | 1065-Lng-A-T | 76   | chr15:51689450-51689550 |
| chr15 | 51699850 | 51699950 | 1223-Lng-C-T | 154  | chr15:51699850-51699950 |
| chr15 | 51713250 | 51713350 | 1065-Lng-C-T | 66   | chr15:51713250-51713350 |
| chr15 | 51738750 | 51738850 | 846-Lng-A-T  | 158  | chr15:51738750-51738850 |
| chr15 | 51762850 | 51762950 | 1004-Lng-A-T | 83   | chr15:51762850-51762950 |
| chr15 | 51763250 | 51763350 | 901-Lng-C-T  | 49   | chr15:51763250-51763350 |
| chr15 | 51765250 | 51765350 | 1090-Lng-B-T | 77   | chr15:51765250-51765350 |
| chr15 | 51796750 | 51796850 | 1223-Lng-D-T | 80   | chr15:51796750-51796850 |
| chr15 | 51800350 | 51800450 | 1065-Lng-C-T | 252  | chr15:51800350-51800450 |

**Table S2: SB Insertion regions**

|       |          |          |              |     |                         |
|-------|----------|----------|--------------|-----|-------------------------|
| chr15 | 51800750 | 51800850 | 1223-Lng-C-T | 344 | chr15:51800750-51800850 |
| chr15 | 51803350 | 51803450 | 1072-Lng-A-T | 215 | chr15:51803350-51803450 |
| chr15 | 51803950 | 51804050 | 1223-Lng-A-T | 150 | chr15:51803950-51804050 |
| chr15 | 51804350 | 51804450 | 1072-Lng-A-T | 64  | chr15:51804350-51804450 |
| chr15 | 51812850 | 51812950 | 1090-Lng-A-T | 55  | chr15:51812850-51812950 |
| chr15 | 51812850 | 51812950 | 901-Lng-C-T  | 37  | chr15:51812850-51812950 |
| chr15 | 51812850 | 51812950 | 901-Lng-C-T  | 112 | chr15:51812850-51812950 |
| chr15 | 51813550 | 51813650 | 1004-Lng-A-T | 95  | chr15:51813550-51813650 |
| chr15 | 51850450 | 51850550 | 1065-Lng-B-T | 57  | chr15:51850450-51850550 |
| chr15 | 51911550 | 51911650 | 901-Lng-D-T  | 305 | chr15:51911550-51911650 |
| chr15 | 51927050 | 51927150 | 1065-Lng-A-T | 129 | chr15:51927050-51927150 |
| chr15 | 51986350 | 51986450 | 1072-Lng-A-T | 55  | chr15:51986350-51986450 |
| chr15 | 52031150 | 52031250 | 846-Lng-A-T  | 252 | chr15:52031150-52031250 |
| chr15 | 52124750 | 52124850 | 901-Lng-A-T  | 63  | chr15:52124750-52124850 |
| chr15 | 52166950 | 52167050 | 1072-Lng-A-T | 155 | chr15:52166950-52167050 |
| chr15 | 52207150 | 52207250 | 1065-Lng-C-T | 88  | chr15:52207150-52207250 |
| chr15 | 52214950 | 52215050 | 1065-Lng-B-T | 354 | chr15:52214950-52215050 |
| chr15 | 52219750 | 52219850 | 1065-Lng-B-T | 86  | chr15:52219750-52219850 |
| chr15 | 52328250 | 52328350 | 901-Lng-A-T  | 128 | chr15:52328250-52328350 |
| chr15 | 52363850 | 52363950 | 1090-Lng-A-T | 109 | chr15:52363850-52363950 |
| chr15 | 52423050 | 52423150 | 846-Lng-A-T  | 146 | chr15:52423050-52423150 |
| chr15 | 52437750 | 52437850 | 846-Lng-A-T  | 48  | chr15:52437750-52437850 |
| chr15 | 52529050 | 52529150 | 1065-Lng-B-T | 48  | chr15:52529050-52529150 |
| chr15 | 52536950 | 52537050 | 1223-Lng-A-T | 696 | chr15:52536950-52537050 |
| chr15 | 52553950 | 52554050 | 901-Lng-B-T  | 54  | chr15:52553950-52554050 |
| chr15 | 52555850 | 52555950 | 1090-Lng-A-T | 92  | chr15:52555850-52555950 |
| chr15 | 52629250 | 52629350 | 1072-Lng-A-T | 69  | chr15:52629250-52629350 |
| chr15 | 52704450 | 52704550 | 1072-Lng-A-T | 121 | chr15:52704450-52704550 |
| chr15 | 52731450 | 52731550 | 901-Lng-A-T  | 89  | chr15:52731450-52731550 |
| chr15 | 52898950 | 52899050 | 1065-Lng-B-T | 70  | chr15:52898950-52899050 |
| chr15 | 52921050 | 52921150 | 1090-Lng-A-T | 114 | chr15:52921050-52921150 |
| chr15 | 52924850 | 52924950 | 1065-Lng-B-T | 52  | chr15:52924850-52924950 |
| chr15 | 52929950 | 52930050 | 1065-Lng-B-T | 108 | chr15:52929950-52930050 |
| chr15 | 52931250 | 52931350 | 1223-Lng-C-T | 75  | chr15:52931250-52931350 |
| chr15 | 52934150 | 52934250 | 1223-Lng-C-T | 59  | chr15:52934150-52934250 |
| chr15 | 52941750 | 52941850 | 1090-Lng-A-T | 70  | chr15:52941750-52941850 |
| chr15 | 52948750 | 52948850 | 1223-Lng-A-T | 309 | chr15:52948750-52948850 |
| chr15 | 52964550 | 52964650 | 1223-Lng-C-T | 56  | chr15:52964550-52964650 |
| chr15 | 52967750 | 52967850 | 901-Lng-A-T  | 120 | chr15:52967750-52967850 |
| chr15 | 52973850 | 52973950 | 1090-Lng-A-T | 63  | chr15:52973850-52973950 |
| chr15 | 52977750 | 52977850 | 901-Lng-C-T  | 32  | chr15:52977750-52977850 |
| chr15 | 53015650 | 53015750 | 901-Lng-D-T  | 150 | chr15:53015650-53015750 |
| chr15 | 53016550 | 53016650 | 1100-Lng-A-T | 81  | chr15:53016550-53016650 |
| chr15 | 53027150 | 53027250 | 1223-Lng-C-T | 77  | chr15:53027150-53027250 |
| chr15 | 53032350 | 53032450 | 1065-Lng-B-T | 45  | chr15:53032350-53032450 |
| chr15 | 53037850 | 53037950 | 846-Lng-A-T  | 85  | chr15:53037850-53037950 |

**Table S2: SB Insertion regions**

|       |          |          |              |       |                         |
|-------|----------|----------|--------------|-------|-------------------------|
| chr15 | 53049750 | 53049850 | 901-Lng-A-T  | 709   | chr15:53049750-53049850 |
| chr15 | 53061250 | 53061350 | 1004-Lng-A-T | 103   | chr15:53061250-53061350 |
| chr15 | 53107050 | 53107150 | 1090-Lng-B-T | 375   | chr15:53107050-53107150 |
| chr15 | 53111550 | 53111650 | 1065-Lng-B-T | 53    | chr15:53111550-53111650 |
| chr15 | 53116350 | 53116450 | 901-Lng-C-T  | 63    | chr15:53116350-53116450 |
| chr15 | 53121350 | 53121450 | 1223-Lng-C-T | 43    | chr15:53121350-53121450 |
| chr15 | 53142950 | 53143050 | 901-Lng-B-T  | 101   | chr15:53142950-53143050 |
| chr15 | 53145450 | 53145550 | 1223-Lng-B-T | 37    | chr15:53145450-53145550 |
| chr15 | 53153050 | 53153150 | 1065-Lng-B-T | 40    | chr15:53153050-53153150 |
| chr15 | 53155650 | 53155750 | 1167-Lng-A-T | 238   | chr15:53155650-53155750 |
| chr15 | 53156850 | 53156950 | 1223-Lng-D-T | 41    | chr15:53156850-53156950 |
| chr15 | 53166550 | 53166650 | 846-Lng-A-T  | 71    | chr15:53166550-53166650 |
| chr15 | 53168250 | 53168350 | 1152-Lng-A-T | 258   | chr15:53168250-53168350 |
| chr15 | 53221650 | 53221750 | 901-Lng-B-T  | 139   | chr15:53221650-53221750 |
| chr15 | 53226050 | 53226150 | 901-Lng-C-T  | 29    | chr15:53226050-53226150 |
| chr15 | 53228150 | 53228250 | 1065-Lng-B-T | 68    | chr15:53228150-53228250 |
| chr15 | 53319650 | 53319750 | 901-Lng-B-T  | 64    | chr15:53319650-53319750 |
| chr15 | 53348150 | 53348250 | 1065-Lng-A-T | 63    | chr15:53348150-53348250 |
| chr15 | 53366750 | 53366850 | 901-Lng-D-T  | 581   | chr15:53366750-53366850 |
| chr15 | 53383550 | 53383650 | 1004-Lng-A-T | 93    | chr15:53383550-53383650 |
| chr15 | 53412650 | 53412750 | 846-Lng-A-T  | 150   | chr15:53412650-53412750 |
| chr15 | 53423050 | 53423150 | 1065-Lng-C-T | 78    | chr15:53423050-53423150 |
| chr15 | 53427450 | 53427550 | 901-Lng-C-T  | 35    | chr15:53427450-53427550 |
| chr15 | 53441850 | 53441950 | 1223-Lng-B-T | 56    | chr15:53441850-53441950 |
| chr15 | 53445650 | 53445750 | 1065-Lng-B-T | 359   | chr15:53445650-53445750 |
| chr15 | 53481750 | 53481850 | 1188-Lng-A-T | 60    | chr15:53481750-53481850 |
| chr15 | 53508050 | 53508150 | 1090-Lng-A-T | 105   | chr15:53508050-53508150 |
| chr15 | 53568950 | 53569050 | 901-Lng-B-T  | 236   | chr15:53568950-53569050 |
| chr15 | 53600150 | 53600250 | 1065-Lng-C-T | 11207 | chr15:53600150-53600250 |
| chr15 | 53600150 | 53600250 | 1065-Lng-A-T | 109   | chr15:53600150-53600250 |
| chr15 | 53614250 | 53614350 | 1065-Lng-C-T | 90    | chr15:53614250-53614350 |
| chr15 | 53615250 | 53615350 | 1065-Lng-C-T | 80    | chr15:53615250-53615350 |
| chr15 | 53620450 | 53620550 | 1090-Lng-B-T | 1089  | chr15:53620450-53620550 |
| chr15 | 53629850 | 53629950 | 1072-Lng-A-T | 87    | chr15:53629850-53629950 |
| chr15 | 53674050 | 53674150 | 1072-Lng-A-T | 210   | chr15:53674050-53674150 |
| chr15 | 53679550 | 53679650 | 901-Lng-A-T  | 86    | chr15:53679550-53679650 |
| chr15 | 53704850 | 53704950 | 1065-Lng-B-T | 45    | chr15:53704850-53704950 |
| chr15 | 53705050 | 53705150 | 1090-Lng-A-T | 65    | chr15:53705050-53705150 |
| chr15 | 53716850 | 53716950 | 1072-Lng-A-T | 72    | chr15:53716850-53716950 |
| chr15 | 53717750 | 53717850 | 1274-Lng-A-T | 105   | chr15:53717750-53717850 |
| chr15 | 53772150 | 53772250 | 1065-Lng-C-T | 135   | chr15:53772150-53772250 |
| chr15 | 53802350 | 53802450 | 901-Lng-D-T  | 57    | chr15:53802350-53802450 |
| chr15 | 53861550 | 53861650 | 1223-Lng-C-T | 45    | chr15:53861550-53861650 |
| chr15 | 53900050 | 53900150 | 1072-Lng-A-T | 73    | chr15:53900050-53900150 |
| chr15 | 53984950 | 53985050 | 1072-Lng-A-T | 50    | chr15:53984950-53985050 |
| chr15 | 54070150 | 54070250 | 1065-Lng-B-T | 43    | chr15:54070150-54070250 |

**Table S2: SB Insertion regions**

|       |          |          |              |      |                         |
|-------|----------|----------|--------------|------|-------------------------|
| chr15 | 54088450 | 54088550 | 1223-Lng-B-T | 54   | chr15:54088450-54088550 |
| chr15 | 54141050 | 54141150 | 1065-Lng-B-T | 50   | chr15:54141050-54141150 |
| chr15 | 54150150 | 54150250 | 1274-Lng-A-T | 111  | chr15:54150150-54150250 |
| chr15 | 54177750 | 54177850 | 901-Lng-A-T  | 122  | chr15:54177750-54177850 |
| chr15 | 54178350 | 54178450 | 1065-Lng-A-T | 95   | chr15:54178350-54178450 |
| chr15 | 54183150 | 54183250 | 1090-Lng-B-T | 514  | chr15:54183150-54183250 |
| chr15 | 54211250 | 54211350 | 1072-Lng-A-T | 132  | chr15:54211250-54211350 |
| chr15 | 54217550 | 54217650 | 1065-Lng-C-T | 68   | chr15:54217550-54217650 |
| chr15 | 54262350 | 54262450 | 846-Lng-A-T  | 124  | chr15:54262350-54262450 |
| chr15 | 54269750 | 54269850 | 901-Lng-A-T  | 65   | chr15:54269750-54269850 |
| chr15 | 54299450 | 54299550 | 1065-Lng-C-T | 70   | chr15:54299450-54299550 |
| chr15 | 54337950 | 54338050 | 1223-Lng-B-T | 70   | chr15:54337950-54338050 |
| chr15 | 54342250 | 54342350 | 1065-Lng-B-T | 94   | chr15:54342250-54342350 |
| chr15 | 54373850 | 54373950 | 1065-Lng-A-T | 92   | chr15:54373850-54373950 |
| chr15 | 54376150 | 54376250 | 846-Lng-A-T  | 60   | chr15:54376150-54376250 |
| chr15 | 54395450 | 54395550 | 846-Lng-A-T  | 77   | chr15:54395450-54395550 |
| chr15 | 54407150 | 54407250 | 1167-Lng-A-T | 55   | chr15:54407150-54407250 |
| chr15 | 54408350 | 54408450 | 1065-Lng-B-T | 339  | chr15:54408350-54408450 |
| chr15 | 54408850 | 54408950 | 1072-Lng-A-T | 73   | chr15:54408850-54408950 |
| chr15 | 54408950 | 54409050 | 1223-Lng-B-T | 203  | chr15:54408950-54409050 |
| chr15 | 54408950 | 54409050 | 901-Lng-A-T  | 62   | chr15:54408950-54409050 |
| chr15 | 54415750 | 54415850 | 1072-Lng-A-T | 115  | chr15:54415750-54415850 |
| chr15 | 54426950 | 54427050 | 1223-Lng-C-T | 3869 | chr15:54426950-54427050 |
| chr15 | 54433250 | 54433350 | 1223-Lng-A-T | 387  | chr15:54433250-54433350 |
| chr15 | 54434350 | 54434450 | 1223-Lng-D-T | 45   | chr15:54434350-54434450 |
| chr15 | 54435750 | 54435850 | 1090-Lng-B-T | 155  | chr15:54435750-54435850 |
| chr15 | 54435850 | 54435950 | 901-Lng-A-T  | 72   | chr15:54435850-54435950 |
| chr15 | 54436650 | 54436750 | 1090-Lng-A-T | 62   | chr15:54436650-54436750 |
| chr15 | 54527050 | 54527150 | 1004-Lng-A-T | 115  | chr15:54527050-54527150 |
| chr15 | 54589350 | 54589450 | 901-Lng-A-T  | 59   | chr15:54589350-54589450 |
| chr15 | 54606150 | 54606250 | 846-Lng-A-T  | 83   | chr15:54606150-54606250 |
| chr15 | 54731850 | 54731950 | 1072-Lng-A-T | 108  | chr15:54731850-54731950 |
| chr15 | 54783150 | 54783250 | 901-Lng-B-T  | 356  | chr15:54783150-54783250 |
| chr15 | 54840450 | 54840550 | 1072-Lng-A-T | 50   | chr15:54840450-54840550 |
| chr15 | 54853950 | 54854050 | 846-Lng-A-T  | 117  | chr15:54853950-54854050 |
| chr15 | 54872250 | 54872350 | 1065-Lng-A-T | 66   | chr15:54872250-54872350 |
| chr15 | 54880750 | 54880850 | 901-Lng-A-T  | 80   | chr15:54880750-54880850 |
| chr15 | 54918250 | 54918350 | 901-Lng-C-T  | 123  | chr15:54918250-54918350 |
| chr15 | 54937650 | 54937750 | 901-Lng-C-T  | 83   | chr15:54937650-54937750 |
| chr15 | 54948250 | 54948350 | 1004-Lng-A-T | 139  | chr15:54948250-54948350 |
| chr15 | 54955550 | 54955650 | 1065-Lng-B-T | 56   | chr15:54955550-54955650 |
| chr15 | 54967850 | 54967950 | 1152-Lng-A-T | 103  | chr15:54967850-54967950 |
| chr15 | 54970150 | 54970250 | 1072-Lng-A-T | 54   | chr15:54970150-54970250 |
| chr15 | 54970150 | 54970250 | 901-Lng-A-T  | 81   | chr15:54970150-54970250 |
| chr15 | 54978550 | 54978650 | 1065-Lng-B-T | 3283 | chr15:54978550-54978650 |
| chr15 | 55001950 | 55002050 | 1065-Lng-A-T | 70   | chr15:55001950-55002050 |

**Table S2: SB Insertion regions**

|       |          |          |              |     |                         |
|-------|----------|----------|--------------|-----|-------------------------|
| chr15 | 55002450 | 55002550 | 1065-Lng-B-T | 85  | chr15:55002450-55002550 |
| chr15 | 55007850 | 55007950 | 901-Lng-D-T  | 44  | chr15:55007850-55007950 |
| chr15 | 55019850 | 55019950 | 1223-Lng-C-T | 276 | chr15:55019850-55019950 |
| chr15 | 55059850 | 55059950 | 1223-Lng-B-T | 41  | chr15:55059850-55059950 |
| chr15 | 55068250 | 55068350 | 1090-Lng-A-T | 52  | chr15:55068250-55068350 |
| chr15 | 55127650 | 55127750 | 1004-Lng-A-T | 116 | chr15:55127650-55127750 |
| chr15 | 55194750 | 55194850 | 846-Lng-A-T  | 87  | chr15:55194750-55194850 |
| chr15 | 55237650 | 55237750 | 1004-Lng-A-T | 52  | chr15:55237650-55237750 |
| chr15 | 55287750 | 55287850 | 1065-Lng-A-T | 51  | chr15:55287750-55287850 |
| chr15 | 55296350 | 55296450 | 1065-Lng-A-T | 40  | chr15:55296350-55296450 |
| chr15 | 55320050 | 55320150 | 1065-Lng-B-T | 59  | chr15:55320050-55320150 |
| chr15 | 55373550 | 55373650 | 1065-Lng-A-T | 60  | chr15:55373550-55373650 |
| chr15 | 55391350 | 55391450 | 1004-Lng-A-T | 49  | chr15:55391350-55391450 |
| chr15 | 55391850 | 55391950 | 1065-Lng-B-T | 72  | chr15:55391850-55391950 |
| chr15 | 55431750 | 55431850 | 1004-Lng-A-T | 57  | chr15:55431750-55431850 |
| chr15 | 55475450 | 55475550 | 1065-Lng-C-T | 90  | chr15:55475450-55475550 |
| chr15 | 55483250 | 55483350 | 901-Lng-C-T  | 64  | chr15:55483250-55483350 |
| chr15 | 55487850 | 55487950 | 901-Lng-C-T  | 30  | chr15:55487850-55487950 |
| chr15 | 55493250 | 55493350 | 1065-Lng-C-T | 87  | chr15:55493250-55493350 |
| chr15 | 55508150 | 55508250 | 1065-Lng-C-T | 176 | chr15:55508150-55508250 |
| chr15 | 55519550 | 55519650 | 1072-Lng-A-T | 130 | chr15:55519550-55519650 |
| chr15 | 55533750 | 55533850 | 901-Lng-A-T  | 63  | chr15:55533750-55533850 |
| chr15 | 55535750 | 55535850 | 1072-Lng-A-T | 121 | chr15:55535750-55535850 |
| chr15 | 55556650 | 55556750 | 1152-Lng-A-T | 118 | chr15:55556650-55556750 |
| chr15 | 55558650 | 55558750 | 1167-Lng-A-T | 241 | chr15:55558650-55558750 |
| chr15 | 55584150 | 55584250 | 1065-Lng-B-T | 57  | chr15:55584150-55584250 |
| chr15 | 55609050 | 55609150 | 1223-Lng-B-T | 130 | chr15:55609050-55609150 |
| chr15 | 55610950 | 55611050 | 901-Lng-B-T  | 39  | chr15:55610950-55611050 |
| chr15 | 55617250 | 55617350 | 1065-Lng-B-T | 61  | chr15:55617250-55617350 |
| chr15 | 55624950 | 55625050 | 901-Lng-A-T  | 138 | chr15:55624950-55625050 |
| chr15 | 55627350 | 55627450 | 1004-Lng-A-T | 84  | chr15:55627350-55627450 |
| chr15 | 55638850 | 55638950 | 901-Lng-A-T  | 149 | chr15:55638850-55638950 |
| chr15 | 55644450 | 55644550 | 1151-Lng-A-T | 75  | chr15:55644450-55644550 |
| chr15 | 55653750 | 55653850 | 901-Lng-D-T  | 158 | chr15:55653750-55653850 |
| chr15 | 55657350 | 55657450 | 901-Lng-A-T  | 307 | chr15:55657350-55657450 |
| chr15 | 55672650 | 55672750 | 1090-Lng-A-T | 45  | chr15:55672650-55672750 |
| chr15 | 55697750 | 55697850 | 1065-Lng-A-T | 66  | chr15:55697750-55697850 |
| chr15 | 55709350 | 55709450 | 1072-Lng-A-T | 66  | chr15:55709350-55709450 |
| chr15 | 55726850 | 55726950 | 1090-Lng-A-T | 75  | chr15:55726850-55726950 |
| chr15 | 55734150 | 55734250 | 1065-Lng-A-T | 128 | chr15:55734150-55734250 |
| chr15 | 55745550 | 55745650 | 901-Lng-C-T  | 154 | chr15:55745550-55745650 |
| chr15 | 55800750 | 55800850 | 1065-Lng-B-T | 41  | chr15:55800750-55800850 |
| chr15 | 55828650 | 55828750 | 1223-Lng-C-T | 67  | chr15:55828650-55828750 |
| chr15 | 55839350 | 55839450 | 1065-Lng-A-T | 152 | chr15:55839350-55839450 |
| chr15 | 55846550 | 55846650 | 1065-Lng-C-T | 62  | chr15:55846550-55846650 |
| chr15 | 55875550 | 55875650 | 901-Lng-A-T  | 129 | chr15:55875550-55875650 |

**Table S2: SB Insertion regions**

|       |          |          |              |      |                         |
|-------|----------|----------|--------------|------|-------------------------|
| chr15 | 56077350 | 56077450 | 1090-Lng-B-T | 774  | chr15:56077350-56077450 |
| chr15 | 56118250 | 56118350 | 1223-Lng-C-T | 56   | chr15:56118250-56118350 |
| chr15 | 56162050 | 56162150 | 1223-Lng-C-T | 144  | chr15:56162050-56162150 |
| chr15 | 56167050 | 56167150 | 1223-Lng-C-T | 62   | chr15:56167050-56167150 |
| chr15 | 56219750 | 56219850 | 1188-Lng-A-T | 48   | chr15:56219750-56219850 |
| chr15 | 56258950 | 56259050 | 1065-Lng-C-T | 108  | chr15:56258950-56259050 |
| chr15 | 56265150 | 56265250 | 901-Lng-D-T  | 114  | chr15:56265150-56265250 |
| chr15 | 56281050 | 56281150 | 1274-Lng-A-T | 53   | chr15:56281050-56281150 |
| chr15 | 56307450 | 56307550 | 1065-Lng-A-T | 64   | chr15:56307450-56307550 |
| chr15 | 56365050 | 56365150 | 1090-Lng-A-T | 1131 | chr15:56365050-56365150 |
| chr15 | 56391350 | 56391450 | 1072-Lng-A-T | 264  | chr15:56391350-56391450 |
| chr15 | 56413250 | 56413350 | 1090-Lng-A-T | 92   | chr15:56413250-56413350 |
| chr15 | 56426350 | 56426450 | 1065-Lng-B-T | 76   | chr15:56426350-56426450 |
| chr15 | 56453350 | 56453450 | 1274-Lng-A-T | 54   | chr15:56453350-56453450 |
| chr15 | 56493750 | 56493850 | 1004-Lng-A-T | 71   | chr15:56493750-56493850 |
| chr15 | 56569750 | 56569850 | 1090-Lng-A-T | 129  | chr15:56569750-56569850 |
| chr15 | 56570650 | 56570750 | 1072-Lng-A-T | 56   | chr15:56570650-56570750 |
| chr15 | 56595350 | 56595450 | 901-Lng-A-T  | 137  | chr15:56595350-56595450 |
| chr15 | 56598150 | 56598250 | 901-Lng-A-T  | 424  | chr15:56598150-56598250 |
| chr15 | 56627950 | 56628050 | 1072-Lng-A-T | 54   | chr15:56627950-56628050 |
| chr15 | 56631650 | 56631750 | 1152-Lng-A-T | 174  | chr15:56631650-56631750 |
| chr15 | 56663750 | 56663850 | 901-Lng-A-T  | 173  | chr15:56663750-56663850 |
| chr15 | 56670250 | 56670350 | 1065-Lng-C-T | 68   | chr15:56670250-56670350 |
| chr15 | 56693350 | 56693450 | 901-Lng-C-T  | 37   | chr15:56693350-56693450 |
| chr15 | 56828850 | 56828950 | 1100-Lng-A-T | 83   | chr15:56828850-56828950 |
| chr15 | 56844150 | 56844250 | 1065-Lng-C-T | 66   | chr15:56844150-56844250 |
| chr15 | 56864050 | 56864150 | 1065-Lng-C-T | 78   | chr15:56864050-56864150 |
| chr15 | 56877450 | 56877550 | 1090-Lng-A-T | 58   | chr15:56877450-56877550 |
| chr15 | 56897550 | 56897650 | 901-Lng-B-T  | 717  | chr15:56897550-56897650 |
| chr15 | 56915950 | 56916050 | 1152-Lng-A-T | 58   | chr15:56915950-56916050 |
| chr15 | 56934950 | 56935050 | 901-Lng-C-T  | 36   | chr15:56934950-56935050 |
| chr15 | 56960950 | 56961050 | 1004-Lng-A-T | 77   | chr15:56960950-56961050 |
| chr15 | 57060650 | 57060750 | 1223-Lng-A-T | 1040 | chr15:57060650-57060750 |
| chr15 | 57063850 | 57063950 | 846-Lng-A-T  | 1847 | chr15:57063850-57063950 |
| chr15 | 57137350 | 57137450 | 1223-Lng-C-T | 43   | chr15:57137350-57137450 |
| chr15 | 57160450 | 57160550 | 1065-Lng-B-T | 90   | chr15:57160450-57160550 |
| chr15 | 57230350 | 57230450 | 1065-Lng-C-T | 98   | chr15:57230350-57230450 |
| chr15 | 57278050 | 57278150 | 901-Lng-C-T  | 65   | chr15:57278050-57278150 |
| chr15 | 57287050 | 57287150 | 901-Lng-A-T  | 68   | chr15:57287050-57287150 |
| chr15 | 57370850 | 57370950 | 1065-Lng-B-T | 41   | chr15:57370850-57370950 |
| chr15 | 57374850 | 57374950 | 1065-Lng-A-T | 34   | chr15:57374850-57374950 |
| chr15 | 57396850 | 57396950 | 1274-Lng-A-T | 61   | chr15:57396850-57396950 |
| chr15 | 57425650 | 57425750 | 1072-Lng-A-T | 54   | chr15:57425650-57425750 |
| chr15 | 57481450 | 57481550 | 1065-Lng-B-T | 44   | chr15:57481450-57481550 |
| chr15 | 57561450 | 57561550 | 1223-Lng-B-T | 101  | chr15:57561450-57561550 |
| chr15 | 57563750 | 57563850 | 1167-Lng-A-T | 72   | chr15:57563750-57563850 |



**Table S2: SB Insertion regions**

|       |          |          |              |      |                         |
|-------|----------|----------|--------------|------|-------------------------|
| chr15 | 57570850 | 57570950 | 1004-Lng-A-T | 106  | chr15:57570850-57570950 |
| chr15 | 57574850 | 57574950 | 1223-Lng-B-T | 35   | chr15:57574850-57574950 |
| chr15 | 57594550 | 57594650 | 846-Lng-A-T  | 70   | chr15:57594550-57594650 |
| chr15 | 57605950 | 57606050 | 1223-Lng-B-T | 99   | chr15:57605950-57606050 |
| chr15 | 57614050 | 57614150 | 901-Lng-A-T  | 73   | chr15:57614050-57614150 |
| chr15 | 57625450 | 57625550 | 1167-Lng-A-T | 74   | chr15:57625450-57625550 |
| chr15 | 57633850 | 57633950 | 1223-Lng-A-T | 1193 | chr15:57633850-57633950 |
| chr15 | 57636350 | 57636450 | 901-Lng-A-T  | 101  | chr15:57636350-57636450 |
| chr15 | 57650250 | 57650350 | 901-Lng-B-T  | 111  | chr15:57650250-57650350 |
| chr15 | 57658450 | 57658550 | 1223-Lng-A-T | 98   | chr15:57658450-57658550 |
| chr15 | 57693250 | 57693350 | 1072-Lng-A-T | 215  | chr15:57693250-57693350 |
| chr15 | 57719550 | 57719650 | 1223-Lng-A-T | 155  | chr15:57719550-57719650 |
| chr15 | 57720050 | 57720150 | 1223-Lng-B-T | 105  | chr15:57720050-57720150 |
| chr15 | 57722650 | 57722750 | 1065-Lng-A-T | 105  | chr15:57722650-57722750 |
| chr15 | 57782150 | 57782250 | 901-Lng-C-T  | 327  | chr15:57782150-57782250 |
| chr15 | 57783550 | 57783650 | 901-Lng-C-T  | 35   | chr15:57783550-57783650 |
| chr15 | 57858850 | 57858950 | 1065-Lng-A-T | 128  | chr15:57858850-57858950 |
| chr15 | 57890650 | 57890750 | 1090-Lng-A-T | 65   | chr15:57890650-57890750 |
| chr15 | 57894050 | 57894150 | 1065-Lng-B-T | 104  | chr15:57894050-57894150 |
| chr15 | 57898050 | 57898150 | 1223-Lng-B-T | 139  | chr15:57898050-57898150 |
| chr15 | 57905150 | 57905250 | 1065-Lng-A-T | 46   | chr15:57905150-57905250 |
| chr15 | 57910950 | 57911050 | 1223-Lng-C-T | 866  | chr15:57910950-57911050 |
| chr15 | 57944150 | 57944250 | 1065-Lng-C-T | 123  | chr15:57944150-57944250 |
| chr15 | 57950950 | 57951050 | 1223-Lng-A-T | 52   | chr15:57950950-57951050 |
| chr15 | 57969650 | 57969750 | 1072-Lng-A-T | 101  | chr15:57969650-57969750 |
| chr15 | 57976250 | 57976350 | 1223-Lng-A-T | 438  | chr15:57976250-57976350 |
| chr15 | 57980050 | 57980150 | 1065-Lng-C-T | 3070 | chr15:57980050-57980150 |
| chr15 | 58039650 | 58039750 | 1065-Lng-B-T | 128  | chr15:58039650-58039750 |
| chr15 | 58040250 | 58040350 | 1072-Lng-A-T | 52   | chr15:58040250-58040350 |
| chr15 | 58071750 | 58071850 | 1223-Lng-B-T | 277  | chr15:58071750-58071850 |
| chr15 | 58082950 | 58083050 | 1090-Lng-A-T | 58   | chr15:58082950-58083050 |
| chr15 | 58138450 | 58138550 | 1065-Lng-A-T | 508  | chr15:58138450-58138550 |
| chr15 | 58153450 | 58153550 | 1090-Lng-A-T | 56   | chr15:58153450-58153550 |
| chr15 | 58173650 | 58173750 | 1065-Lng-C-T | 77   | chr15:58173650-58173750 |
| chr15 | 58203550 | 58203650 | 1065-Lng-A-T | 1063 | chr15:58203550-58203650 |
| chr15 | 58206550 | 58206650 | 1065-Lng-B-T | 63   | chr15:58206550-58206650 |
| chr15 | 58228250 | 58228350 | 846-Lng-A-T  | 59   | chr15:58228250-58228350 |
| chr15 | 58241150 | 58241250 | 901-Lng-B-T  | 144  | chr15:58241150-58241250 |
| chr15 | 58248250 | 58248350 | 901-Lng-B-T  | 44   | chr15:58248250-58248350 |
| chr15 | 58250450 | 58250550 | 1223-Lng-C-T | 43   | chr15:58250450-58250550 |
| chr15 | 58250850 | 58250950 | 1065-Lng-C-T | 424  | chr15:58250850-58250950 |
| chr15 | 58254750 | 58254850 | 1223-Lng-D-T | 97   | chr15:58254750-58254850 |
| chr15 | 58257350 | 58257450 | 846-Lng-A-T  | 138  | chr15:58257350-58257450 |
| chr15 | 58265350 | 58265450 | 1065-Lng-A-T | 68   | chr15:58265350-58265450 |
| chr15 | 58275350 | 58275450 | 901-Lng-B-T  | 55   | chr15:58275350-58275450 |
| chr15 | 58284650 | 58284750 | 1065-Lng-A-T | 62   | chr15:58284650-58284750 |

**Table S2: SB Insertion regions**

|       |          |          |              |      |                         |
|-------|----------|----------|--------------|------|-------------------------|
| chr15 | 58289750 | 58289850 | 901-Lng-A-T  | 70   | chr15:58289750-58289850 |
| chr15 | 58309750 | 58309850 | 846-Lng-A-T  | 148  | chr15:58309750-58309850 |
| chr15 | 58386050 | 58386150 | 901-Lng-C-T  | 70   | chr15:58386050-58386150 |
| chr15 | 58386850 | 58386950 | 1072-Lng-A-T | 95   | chr15:58386850-58386950 |
| chr15 | 58396350 | 58396450 | 1065-Lng-A-T | 161  | chr15:58396350-58396450 |
| chr15 | 58407350 | 58407450 | 901-Lng-B-T  | 98   | chr15:58407350-58407450 |
| chr15 | 58447650 | 58447750 | 1167-Lng-A-T | 71   | chr15:58447650-58447750 |
| chr15 | 58516550 | 58516650 | 1152-Lng-A-T | 100  | chr15:58516550-58516650 |
| chr15 | 58542550 | 58542650 | 1274-Lng-A-T | 49   | chr15:58542550-58542650 |
| chr15 | 58649750 | 58649850 | 901-Lng-D-T  | 140  | chr15:58649750-58649850 |
| chr15 | 58649850 | 58649950 | 1090-Lng-A-T | 75   | chr15:58649850-58649950 |
| chr15 | 58718950 | 58719050 | 1004-Lng-A-T | 89   | chr15:58718950-58719050 |
| chr15 | 58728150 | 58728250 | 1151-Lng-A-T | 359  | chr15:58728150-58728250 |
| chr15 | 58728250 | 58728350 | 1065-Lng-B-T | 70   | chr15:58728250-58728350 |
| chr15 | 58729650 | 58729750 | 1223-Lng-A-T | 53   | chr15:58729650-58729750 |
| chr15 | 58732750 | 58732850 | 1090-Lng-A-T | 113  | chr15:58732750-58732850 |
| chr15 | 58732950 | 58733050 | 1223-Lng-B-T | 113  | chr15:58732950-58733050 |
| chr15 | 58757350 | 58757450 | 1065-Lng-C-T | 115  | chr15:58757350-58757450 |
| chr15 | 58780750 | 58780850 | 1274-Lng-A-T | 129  | chr15:58780750-58780850 |
| chr15 | 58781250 | 58781350 | 1065-Lng-C-T | 65   | chr15:58781250-58781350 |
| chr15 | 58787650 | 58787750 | 1065-Lng-C-T | 67   | chr15:58787650-58787750 |
| chr15 | 58821250 | 58821350 | 1151-Lng-A-T | 116  | chr15:58821250-58821350 |
| chr15 | 58838350 | 58838450 | 1223-Lng-B-T | 34   | chr15:58838350-58838450 |
| chr15 | 58840450 | 58840550 | 901-Lng-C-T  | 65   | chr15:58840450-58840550 |
| chr15 | 58843650 | 58843750 | 901-Lng-A-T  | 59   | chr15:58843650-58843750 |
| chr15 | 58852450 | 58852550 | 1100-Lng-A-T | 53   | chr15:58852450-58852550 |
| chr15 | 58868750 | 58868850 | 1065-Lng-B-T | 44   | chr15:58868750-58868850 |
| chr15 | 58890350 | 58890450 | 901-Lng-A-T  | 88   | chr15:58890350-58890450 |
| chr15 | 58892750 | 58892850 | 901-Lng-A-T  | 62   | chr15:58892750-58892850 |
| chr15 | 58924150 | 58924250 | 1167-Lng-A-T | 1048 | chr15:58924150-58924250 |
| chr15 | 58927250 | 58927350 | 1090-Lng-A-T | 57   | chr15:58927250-58927350 |
| chr15 | 58931150 | 58931250 | 901-Lng-A-T  | 66   | chr15:58931150-58931250 |
| chr15 | 58966950 | 58967050 | 1065-Lng-B-T | 100  | chr15:58966950-58967050 |
| chr15 | 58975050 | 58975150 | 1065-Lng-B-T | 592  | chr15:58975050-58975150 |
| chr15 | 59148950 | 59149050 | 1072-Lng-A-T | 54   | chr15:59148950-59149050 |
| chr15 | 59149250 | 59149350 | 1004-Lng-A-T | 78   | chr15:59149250-59149350 |
| chr15 | 59192150 | 59192250 | 1090-Lng-A-T | 71   | chr15:59192150-59192250 |
| chr15 | 59209950 | 59210050 | 1065-Lng-A-T | 43   | chr15:59209950-59210050 |
| chr15 | 59217950 | 59218050 | 1072-Lng-A-T | 60   | chr15:59217950-59218050 |
| chr15 | 59223950 | 59224050 | 1090-Lng-A-T | 45   | chr15:59223950-59224050 |
| chr15 | 59247650 | 59247750 | 1065-Lng-B-T | 44   | chr15:59247650-59247750 |
| chr15 | 59249750 | 59249850 | 1090-Lng-A-T | 77   | chr15:59249750-59249850 |
| chr15 | 59260450 | 59260550 | 1223-Lng-B-T | 63   | chr15:59260450-59260550 |
| chr15 | 59268150 | 59268250 | 1065-Lng-B-T | 47   | chr15:59268150-59268250 |
| chr15 | 59290250 | 59290350 | 1167-Lng-A-T | 2336 | chr15:59290250-59290350 |
| chr15 | 59290650 | 59290750 | 1167-Lng-A-T | 902  | chr15:59290650-59290750 |

**Table S2: SB Insertion regions**

|       |          |          |              |      |                         |
|-------|----------|----------|--------------|------|-------------------------|
| chr15 | 59292750 | 59292850 | 1223-Lng-C-T | 48   | chr15:59292750-59292850 |
| chr15 | 59299550 | 59299650 | 1090-Lng-A-T | 73   | chr15:59299550-59299650 |
| chr15 | 59316250 | 59316350 | 901-Lng-B-T  | 114  | chr15:59316250-59316350 |
| chr15 | 59327650 | 59327750 | 1188-Lng-A-T | 50   | chr15:59327650-59327750 |
| chr15 | 59331450 | 59331550 | 901-Lng-B-T  | 181  | chr15:59331450-59331550 |
| chr15 | 59343450 | 59343550 | 901-Lng-B-T  | 104  | chr15:59343450-59343550 |
| chr15 | 59360750 | 59360850 | 1223-Lng-A-T | 90   | chr15:59360750-59360850 |
| chr15 | 59416950 | 59417050 | 1167-Lng-A-T | 73   | chr15:59416950-59417050 |
| chr15 | 59491050 | 59491150 | 1151-Lng-A-T | 62   | chr15:59491050-59491150 |
| chr15 | 59566850 | 59566950 | 1152-Lng-A-T | 290  | chr15:59566850-59566950 |
| chr15 | 59631150 | 59631250 | 1072-Lng-A-T | 49   | chr15:59631150-59631250 |
| chr15 | 59671150 | 59671250 | 1065-Lng-A-T | 42   | chr15:59671150-59671250 |
| chr15 | 59690950 | 59691050 | 1065-Lng-C-T | 84   | chr15:59690950-59691050 |
| chr15 | 59709850 | 59709950 | 1167-Lng-A-T | 47   | chr15:59709850-59709950 |
| chr15 | 59721650 | 59721750 | 901-Lng-C-T  | 194  | chr15:59721650-59721750 |
| chr15 | 59756150 | 59756250 | 1090-Lng-A-T | 62   | chr15:59756150-59756250 |
| chr15 | 59791650 | 59791750 | 1065-Lng-A-T | 106  | chr15:59791650-59791750 |
| chr15 | 59823450 | 59823550 | 1065-Lng-B-T | 60   | chr15:59823450-59823550 |
| chr15 | 59839050 | 59839150 | 1065-Lng-A-T | 121  | chr15:59839050-59839150 |
| chr15 | 59991650 | 59991750 | 1065-Lng-B-T | 60   | chr15:59991650-59991750 |
| chr15 | 60090650 | 60090750 | 846-Lng-A-T  | 144  | chr15:60090650-60090750 |
| chr15 | 60140450 | 60140550 | 1065-Lng-B-T | 215  | chr15:60140450-60140550 |
| chr15 | 60177150 | 60177250 | 1065-Lng-B-T | 54   | chr15:60177150-60177250 |
| chr15 | 60191450 | 60191550 | 1065-Lng-C-T | 93   | chr15:60191450-60191550 |
| chr15 | 60262650 | 60262750 | 901-Lng-D-T  | 361  | chr15:60262650-60262750 |
| chr15 | 60349050 | 60349150 | 1065-Lng-C-T | 103  | chr15:60349050-60349150 |
| chr15 | 60402350 | 60402450 | 1223-Lng-C-T | 46   | chr15:60402350-60402450 |
| chr15 | 60421950 | 60422050 | 901-Lng-A-T  | 84   | chr15:60421950-60422050 |
| chr15 | 60432250 | 60432350 | 901-Lng-C-T  | 138  | chr15:60432250-60432350 |
| chr15 | 60446450 | 60446550 | 1004-Lng-A-T | 99   | chr15:60446450-60446550 |
| chr15 | 60450950 | 60451050 | 901-Lng-C-T  | 129  | chr15:60450950-60451050 |
| chr15 | 60459750 | 60459850 | 901-Lng-C-T  | 116  | chr15:60459750-60459850 |
| chr15 | 60524450 | 60524550 | 1223-Lng-C-T | 3093 | chr15:60524450-60524550 |
| chr15 | 60553250 | 60553350 | 1004-Lng-A-T | 51   | chr15:60553250-60553350 |
| chr15 | 60585850 | 60585950 | 846-Lng-A-T  | 42   | chr15:60585850-60585950 |
| chr15 | 60596050 | 60596150 | 901-Lng-A-T  | 292  | chr15:60596050-60596150 |
| chr15 | 60613550 | 60613650 | 1167-Lng-A-T | 235  | chr15:60613550-60613650 |
| chr15 | 60619250 | 60619350 | 1151-Lng-A-T | 109  | chr15:60619250-60619350 |
| chr15 | 60622650 | 60622750 | 1151-Lng-A-T | 291  | chr15:60622650-60622750 |
| chr15 | 60625450 | 60625550 | 1167-Lng-A-T | 97   | chr15:60625450-60625550 |
| chr15 | 60649350 | 60649450 | 901-Lng-D-T  | 38   | chr15:60649350-60649450 |
| chr15 | 60649450 | 60649550 | 1065-Lng-B-T | 54   | chr15:60649450-60649550 |
| chr15 | 60685450 | 60685550 | 901-Lng-A-T  | 79   | chr15:60685450-60685550 |
| chr15 | 60689250 | 60689350 | 1090-Lng-B-T | 690  | chr15:60689250-60689350 |
| chr15 | 60720550 | 60720650 | 1065-Lng-A-T | 50   | chr15:60720550-60720650 |
| chr15 | 60726850 | 60726950 | 901-Lng-B-T  | 227  | chr15:60726850-60726950 |

**Table S2: SB Insertion regions**

|       |          |          |              |      |                         |
|-------|----------|----------|--------------|------|-------------------------|
| chr15 | 60739350 | 60739450 | 1167-Lng-A-T | 106  | chr15:60739350-60739450 |
| chr15 | 60896150 | 60896250 | 1072-Lng-A-T | 76   | chr15:60896150-60896250 |
| chr15 | 60931650 | 60931750 | 1223-Lng-B-T | 155  | chr15:60931650-60931750 |
| chr15 | 60950350 | 60950450 | 1090-Lng-A-T | 57   | chr15:60950350-60950450 |
| chr15 | 61037950 | 61038050 | 1004-Lng-A-T | 53   | chr15:61037950-61038050 |
| chr15 | 61211550 | 61211650 | 1223-Lng-B-T | 58   | chr15:61211550-61211650 |
| chr15 | 61266150 | 61266250 | 1065-Lng-A-T | 52   | chr15:61266150-61266250 |
| chr15 | 61277550 | 61277650 | 901-Lng-D-T  | 74   | chr15:61277550-61277650 |
| chr15 | 61310550 | 61310650 | 901-Lng-C-T  | 138  | chr15:61310550-61310650 |
| chr15 | 61348550 | 61348650 | 901-Lng-D-T  | 246  | chr15:61348550-61348650 |
| chr15 | 61367350 | 61367450 | 1065-Lng-C-T | 1272 | chr15:61367350-61367450 |
| chr15 | 61394550 | 61394650 | 1090-Lng-B-T | 1506 | chr15:61394550-61394650 |
| chr15 | 61446950 | 61447050 | 1072-Lng-A-T | 55   | chr15:61446950-61447050 |
| chr15 | 61514950 | 61515050 | 1065-Lng-B-T | 66   | chr15:61514950-61515050 |
| chr15 | 61542550 | 61542650 | 1072-Lng-A-T | 58   | chr15:61542550-61542650 |
| chr15 | 61546150 | 61546250 | 901-Lng-C-T  | 65   | chr15:61546150-61546250 |
| chr15 | 61715650 | 61715750 | 1072-Lng-A-T | 396  | chr15:61715650-61715750 |
| chr15 | 61784050 | 61784150 | 901-Lng-A-T  | 252  | chr15:61784050-61784150 |
| chr15 | 61838050 | 61838150 | 1004-Lng-A-T | 132  | chr15:61838050-61838150 |
| chr15 | 61858750 | 61858850 | 1065-Lng-A-T | 56   | chr15:61858750-61858850 |
| chr15 | 61892650 | 61892750 | 1167-Lng-A-T | 58   | chr15:61892650-61892750 |
| chr15 | 61939250 | 61939350 | 1065-Lng-A-T | 90   | chr15:61939250-61939350 |
| chr15 | 61941450 | 61941550 | 1223-Lng-A-T | 144  | chr15:61941450-61941550 |
| chr15 | 61962450 | 61962550 | 1223-Lng-B-T | 334  | chr15:61962450-61962550 |
| chr15 | 61983050 | 61983150 | 1090-Lng-A-T | 53   | chr15:61983050-61983150 |
| chr15 | 62017950 | 62018050 | 1223-Lng-B-T | 51   | chr15:62017950-62018050 |
| chr15 | 62026250 | 62026350 | 1167-Lng-A-T | 140  | chr15:62026250-62026350 |
| chr15 | 62154950 | 62155050 | 901-Lng-B-T  | 121  | chr15:62154950-62155050 |
| chr15 | 62184750 | 62184850 | 1223-Lng-D-T | 48   | chr15:62184750-62184850 |
| chr15 | 62219850 | 62219950 | 901-Lng-A-T  | 67   | chr15:62219850-62219950 |
| chr15 | 62223450 | 62223550 | 1167-Lng-A-T | 87   | chr15:62223450-62223550 |
| chr15 | 62236050 | 62236150 | 1004-Lng-A-T | 210  | chr15:62236050-62236150 |
| chr15 | 62331750 | 62331850 | 1072-Lng-A-T | 53   | chr15:62331750-62331850 |
| chr15 | 62374250 | 62374350 | 1065-Lng-B-T | 57   | chr15:62374250-62374350 |
| chr15 | 62403250 | 62403350 | 1223-Lng-A-T | 195  | chr15:62403250-62403350 |
| chr15 | 62436050 | 62436150 | 846-Lng-A-T  | 74   | chr15:62436050-62436150 |
| chr15 | 62474350 | 62474450 | 901-Lng-A-T  | 60   | chr15:62474350-62474450 |
| chr15 | 62488750 | 62488850 | 1090-Lng-A-T | 64   | chr15:62488750-62488850 |
| chr15 | 62497750 | 62497850 | 1065-Lng-A-T | 44   | chr15:62497750-62497850 |
| chr15 | 62542850 | 62542950 | 1004-Lng-A-T | 75   | chr15:62542850-62542950 |
| chr15 | 62574350 | 62574450 | 1167-Lng-A-T | 145  | chr15:62574350-62574450 |
| chr15 | 62672050 | 62672150 | 1065-Lng-C-T | 88   | chr15:62672050-62672150 |
| chr15 | 62746050 | 62746150 | 1090-Lng-A-T | 114  | chr15:62746050-62746150 |
| chr15 | 62775250 | 62775350 | 1072-Lng-A-T | 65   | chr15:62775250-62775350 |
| chr15 | 62859750 | 62859850 | 1004-Lng-A-T | 282  | chr15:62859750-62859850 |
| chr15 | 62899550 | 62899650 | 1090-Lng-A-T | 57   | chr15:62899550-62899650 |

**Table S2: SB Insertion regions**

|       |          |          |              |      |                         |
|-------|----------|----------|--------------|------|-------------------------|
| chr15 | 62899950 | 62900050 | 901-Lng-A-T  | 95   | chr15:62899950-62900050 |
| chr15 | 62933750 | 62933850 | 1065-Lng-B-T | 40   | chr15:62933750-62933850 |
| chr15 | 62979750 | 62979850 | 1065-Lng-B-T | 74   | chr15:62979750-62979850 |
| chr15 | 62993350 | 62993450 | 1065-Lng-B-T | 80   | chr15:62993350-62993450 |
| chr15 | 63017850 | 63017950 | 901-Lng-A-T  | 56   | chr15:63017850-63017950 |
| chr15 | 63021850 | 63021950 | 901-Lng-B-T  | 82   | chr15:63021850-63021950 |
| chr15 | 63062650 | 63062750 | 846-Lng-A-T  | 47   | chr15:63062650-63062750 |
| chr15 | 63113250 | 63113350 | 901-Lng-A-T  | 161  | chr15:63113250-63113350 |
| chr15 | 63170350 | 63170450 | 1274-Lng-A-T | 67   | chr15:63170350-63170450 |
| chr15 | 63179450 | 63179550 | 1090-Lng-A-T | 94   | chr15:63179450-63179550 |
| chr15 | 63269850 | 63269950 | 1065-Lng-B-T | 48   | chr15:63269850-63269950 |
| chr15 | 63276150 | 63276250 | 1223-Lng-B-T | 38   | chr15:63276150-63276250 |
| chr15 | 63281650 | 63281750 | 1065-Lng-C-T | 89   | chr15:63281650-63281750 |
| chr15 | 63291750 | 63291850 | 1090-Lng-A-T | 56   | chr15:63291750-63291850 |
| chr15 | 63493650 | 63493750 | 901-Lng-B-T  | 127  | chr15:63493650-63493750 |
| chr15 | 63524950 | 63525050 | 1072-Lng-A-T | 97   | chr15:63524950-63525050 |
| chr15 | 63525950 | 63526050 | 901-Lng-A-T  | 327  | chr15:63525950-63526050 |
| chr15 | 63529350 | 63529450 | 901-Lng-D-T  | 111  | chr15:63529350-63529450 |
| chr15 | 63558150 | 63558250 | 1223-Lng-D-T | 54   | chr15:63558150-63558250 |
| chr15 | 63668050 | 63668150 | 1065-Lng-C-T | 66   | chr15:63668050-63668150 |
| chr15 | 63759250 | 63759350 | 1090-Lng-A-T | 89   | chr15:63759250-63759350 |
| chr15 | 63767850 | 63767950 | 901-Lng-C-T  | 114  | chr15:63767850-63767950 |
| chr15 | 63768650 | 63768750 | 1065-Lng-A-T | 73   | chr15:63768650-63768750 |
| chr15 | 63785950 | 63786050 | 1100-Lng-A-T | 53   | chr15:63785950-63786050 |
| chr15 | 63790250 | 63790350 | 1152-Lng-A-T | 175  | chr15:63790250-63790350 |
| chr15 | 63791450 | 63791550 | 1065-Lng-A-T | 35   | chr15:63791450-63791550 |
| chr15 | 63795650 | 63795750 | 1072-Lng-A-T | 157  | chr15:63795650-63795750 |
| chr15 | 63795650 | 63795750 | 1065-Lng-B-T | 52   | chr15:63795650-63795750 |
| chr15 | 63797250 | 63797350 | 1072-Lng-A-T | 74   | chr15:63797250-63797350 |
| chr15 | 63802850 | 63802950 | 1100-Lng-A-T | 89   | chr15:63802850-63802950 |
| chr15 | 63806050 | 63806150 | 901-Lng-A-T  | 54   | chr15:63806050-63806150 |
| chr15 | 63806350 | 63806450 | 846-Lng-A-T  | 97   | chr15:63806350-63806450 |
| chr15 | 63818950 | 63819050 | 1065-Lng-A-T | 76   | chr15:63818950-63819050 |
| chr15 | 63820850 | 63820950 | 901-Lng-A-T  | 69   | chr15:63820850-63820950 |
| chr15 | 63823050 | 63823150 | 846-Lng-A-T  | 65   | chr15:63823050-63823150 |
| chr15 | 63825950 | 63826050 | 901-Lng-D-T  | 269  | chr15:63825950-63826050 |
| chr15 | 63832150 | 63832250 | 901-Lng-A-T  | 62   | chr15:63832150-63832250 |
| chr15 | 63904250 | 63904350 | 1167-Lng-A-T | 59   | chr15:63904250-63904350 |
| chr15 | 63924450 | 63924550 | 1072-Lng-A-T | 93   | chr15:63924450-63924550 |
| chr15 | 63965750 | 63965850 | 1065-Lng-B-T | 142  | chr15:63965750-63965850 |
| chr15 | 63994750 | 63994850 | 901-Lng-D-T  | 317  | chr15:63994750-63994850 |
| chr15 | 64030850 | 64030950 | 1090-Lng-A-T | 50   | chr15:64030850-64030950 |
| chr15 | 64076250 | 64076350 | 1072-Lng-A-T | 3623 | chr15:64076250-64076350 |
| chr15 | 64124750 | 64124850 | 1072-Lng-A-T | 179  | chr15:64124750-64124850 |
| chr15 | 64129350 | 64129450 | 1065-Lng-B-T | 56   | chr15:64129350-64129450 |
| chr15 | 64157850 | 64157950 | 1223-Lng-B-T | 37   | chr15:64157850-64157950 |

**Table S2: SB Insertion regions**

|       |          |          |              |     |                         |
|-------|----------|----------|--------------|-----|-------------------------|
| chr15 | 64239850 | 64239950 | 1223-Lng-B-T | 36  | chr15:64239850-64239950 |
| chr15 | 64264150 | 64264250 | 1065-Lng-C-T | 84  | chr15:64264150-64264250 |
| chr15 | 64300450 | 64300550 | 901-Lng-A-T  | 361 | chr15:64300450-64300550 |
| chr15 | 64349150 | 64349250 | 1223-Lng-A-T | 664 | chr15:64349150-64349250 |
| chr15 | 64418150 | 64418250 | 1065-Lng-B-T | 69  | chr15:64418150-64418250 |
| chr15 | 64431150 | 64431250 | 1065-Lng-C-T | 717 | chr15:64431150-64431250 |
| chr15 | 64443250 | 64443350 | 1004-Lng-A-T | 180 | chr15:64443250-64443350 |
| chr15 | 64483050 | 64483150 | 901-Lng-A-T  | 64  | chr15:64483050-64483150 |
| chr15 | 64489550 | 64489650 | 1090-Lng-A-T | 70  | chr15:64489550-64489650 |
| chr15 | 64531650 | 64531750 | 1072-Lng-A-T | 145 | chr15:64531650-64531750 |
| chr15 | 64564150 | 64564250 | 901-Lng-B-T  | 304 | chr15:64564150-64564250 |
| chr15 | 64566150 | 64566250 | 901-Lng-C-T  | 75  | chr15:64566150-64566250 |
| chr15 | 64571850 | 64571950 | 1065-Lng-B-T | 150 | chr15:64571850-64571950 |
| chr15 | 64669250 | 64669350 | 1065-Lng-C-T | 480 | chr15:64669250-64669350 |
| chr15 | 64672450 | 64672550 | 901-Lng-D-T  | 592 | chr15:64672450-64672550 |
| chr15 | 64701550 | 64701650 | 1223-Lng-B-T | 42  | chr15:64701550-64701650 |
| chr15 | 64725750 | 64725850 | 1004-Lng-A-T | 220 | chr15:64725750-64725850 |
| chr15 | 64802550 | 64802650 | 1223-Lng-A-T | 79  | chr15:64802550-64802650 |
| chr15 | 64858650 | 64858750 | 1072-Lng-A-T | 124 | chr15:64858650-64858750 |
| chr15 | 64860550 | 64860650 | 1065-Lng-A-T | 61  | chr15:64860550-64860650 |
| chr15 | 64904950 | 64905050 | 1072-Lng-A-T | 72  | chr15:64904950-64905050 |
| chr15 | 64945050 | 64945150 | 1065-Lng-A-T | 35  | chr15:64945050-64945150 |
| chr15 | 64960050 | 64960150 | 1065-Lng-B-T | 41  | chr15:64960050-64960150 |
| chr15 | 64970350 | 64970450 | 901-Lng-B-T  | 80  | chr15:64970350-64970450 |
| chr15 | 65060550 | 65060650 | 1065-Lng-B-T | 51  | chr15:65060550-65060650 |
| chr15 | 65133550 | 65133650 | 1072-Lng-A-T | 123 | chr15:65133550-65133650 |
| chr15 | 65164550 | 65164650 | 1223-Lng-D-T | 48  | chr15:65164550-65164650 |
| chr15 | 65173750 | 65173850 | 1223-Lng-B-T | 234 | chr15:65173750-65173850 |
| chr15 | 65194150 | 65194250 | 1152-Lng-A-T | 119 | chr15:65194150-65194250 |
| chr15 | 65268250 | 65268350 | 1090-Lng-B-T | 245 | chr15:65268250-65268350 |
| chr15 | 65305350 | 65305450 | 901-Lng-C-T  | 59  | chr15:65305350-65305450 |
| chr15 | 65311350 | 65311450 | 901-Lng-B-T  | 434 | chr15:65311350-65311450 |
| chr15 | 65360950 | 65361050 | 1223-Lng-C-T | 52  | chr15:65360950-65361050 |
| chr15 | 65378350 | 65378450 | 1090-Lng-A-T | 96  | chr15:65378350-65378450 |
| chr15 | 65457750 | 65457850 | 901-Lng-A-T  | 113 | chr15:65457750-65457850 |
| chr15 | 65465150 | 65465250 | 1223-Lng-D-T | 42  | chr15:65465150-65465250 |
| chr15 | 65544850 | 65544950 | 901-Lng-B-T  | 182 | chr15:65544850-65544950 |
| chr15 | 65559450 | 65559550 | 1065-Lng-C-T | 974 | chr15:65559450-65559550 |
| chr15 | 65611050 | 65611150 | 1004-Lng-A-T | 68  | chr15:65611050-65611150 |
| chr15 | 65615350 | 65615450 | 846-Lng-A-T  | 63  | chr15:65615350-65615450 |
| chr15 | 65617850 | 65617950 | 1072-Lng-A-T | 68  | chr15:65617850-65617950 |
| chr15 | 65628050 | 65628150 | 1065-Lng-C-T | 66  | chr15:65628050-65628150 |
| chr15 | 65628250 | 65628350 | 1072-Lng-A-T | 48  | chr15:65628250-65628350 |
| chr15 | 65631150 | 65631250 | 1004-Lng-A-T | 49  | chr15:65631150-65631250 |
| chr15 | 65636650 | 65636750 | 1167-Lng-A-T | 88  | chr15:65636650-65636750 |
| chr15 | 65636850 | 65636950 | 1072-Lng-A-T | 157 | chr15:65636850-65636950 |

**Table S2: SB Insertion regions**

|       |          |          |              |      |                         |
|-------|----------|----------|--------------|------|-------------------------|
| chr15 | 65640550 | 65640650 | 1223-Lng-A-T | 1421 | chr15:65640550-65640650 |
| chr15 | 65645650 | 65645750 | 1090-Lng-A-T | 66   | chr15:65645650-65645750 |
| chr15 | 65659850 | 65659950 | 1223-Lng-A-T | 100  | chr15:65659850-65659950 |
| chr15 | 65676650 | 65676750 | 846-Lng-A-T  | 146  | chr15:65676650-65676750 |
| chr15 | 65696250 | 65696350 | 1072-Lng-A-T | 54   | chr15:65696250-65696350 |
| chr15 | 65728250 | 65728350 | 901-Lng-B-T  | 213  | chr15:65728250-65728350 |
| chr15 | 65760750 | 65760850 | 1065-Lng-B-T | 42   | chr15:65760750-65760850 |
| chr15 | 65765850 | 65765950 | 901-Lng-A-T  | 494  | chr15:65765850-65765950 |
| chr15 | 65799550 | 65799650 | 1065-Lng-C-T | 92   | chr15:65799550-65799650 |
| chr15 | 65806050 | 65806150 | 1072-Lng-A-T | 60   | chr15:65806050-65806150 |
| chr15 | 65832550 | 65832650 | 1072-Lng-A-T | 76   | chr15:65832550-65832650 |
| chr15 | 65869450 | 65869550 | 901-Lng-B-T  | 122  | chr15:65869450-65869550 |
| chr15 | 65922550 | 65922650 | 1065-Lng-B-T | 54   | chr15:65922550-65922650 |
| chr15 | 65956550 | 65956650 | 1065-Lng-B-T | 64   | chr15:65956550-65956650 |
| chr15 | 66057250 | 66057350 | 901-Lng-B-T  | 38   | chr15:66057250-66057350 |
| chr15 | 66062250 | 66062350 | 1274-Lng-A-T | 52   | chr15:66062250-66062350 |
| chr15 | 66068750 | 66068850 | 1274-Lng-A-T | 57   | chr15:66068750-66068850 |
| chr15 | 66099750 | 66099850 | 1072-Lng-A-T | 218  | chr15:66099750-66099850 |
| chr15 | 66106050 | 66106150 | 901-Lng-D-T  | 469  | chr15:66106050-66106150 |
| chr15 | 66174550 | 66174650 | 1065-Lng-B-T | 87   | chr15:66174550-66174650 |
| chr15 | 66195950 | 66196050 | 1065-Lng-A-T | 81   | chr15:66195950-66196050 |
| chr15 | 66251950 | 66252050 | 1223-Lng-C-T | 49   | chr15:66251950-66252050 |
| chr15 | 66265250 | 66265350 | 1072-Lng-A-T | 67   | chr15:66265250-66265350 |
| chr15 | 66281450 | 66281550 | 901-Lng-A-T  | 152  | chr15:66281450-66281550 |
| chr15 | 66349950 | 66350050 | 1167-Lng-A-T | 89   | chr15:66349950-66350050 |
| chr15 | 66360450 | 66360550 | 1065-Lng-B-T | 144  | chr15:66360450-66360550 |
| chr15 | 66373450 | 66373550 | 1072-Lng-A-T | 85   | chr15:66373450-66373550 |
| chr15 | 66373450 | 66373550 | 1167-Lng-A-T | 2800 | chr15:66373450-66373550 |
| chr15 | 66391750 | 66391850 | 1223-Lng-B-T | 239  | chr15:66391750-66391850 |
| chr15 | 66412250 | 66412350 | 1223-Lng-B-T | 291  | chr15:66412250-66412350 |
| chr15 | 66413050 | 66413150 | 1152-Lng-A-T | 250  | chr15:66413050-66413150 |
| chr15 | 66413450 | 66413550 | 1223-Lng-B-T | 37   | chr15:66413450-66413550 |
| chr15 | 66413750 | 66413850 | 1152-Lng-A-T | 215  | chr15:66413750-66413850 |
| chr15 | 66420950 | 66421050 | 846-Lng-A-T  | 42   | chr15:66420950-66421050 |
| chr15 | 66424350 | 66424450 | 1223-Lng-B-T | 115  | chr15:66424350-66424450 |
| chr15 | 66424750 | 66424850 | 1072-Lng-A-T | 164  | chr15:66424750-66424850 |
| chr15 | 66425950 | 66426050 | 1065-Lng-A-T | 64   | chr15:66425950-66426050 |
| chr15 | 66427150 | 66427250 | 1065-Lng-A-T | 85   | chr15:66427150-66427250 |
| chr15 | 66435750 | 66435850 | 1065-Lng-A-T | 41   | chr15:66435750-66435850 |
| chr15 | 66444850 | 66444950 | 1090-Lng-A-T | 60   | chr15:66444850-66444950 |
| chr15 | 66450950 | 66451050 | 901-Lng-B-T  | 173  | chr15:66450950-66451050 |
| chr15 | 66452750 | 66452850 | 1167-Lng-A-T | 340  | chr15:66452750-66452850 |
| chr15 | 66453650 | 66453750 | 901-Lng-A-T  | 73   | chr15:66453650-66453750 |
| chr15 | 66457650 | 66457750 | 1065-Lng-C-T | 211  | chr15:66457650-66457750 |
| chr15 | 66462650 | 66462750 | 1223-Lng-A-T | 2269 | chr15:66462650-66462750 |
| chr15 | 66463950 | 66464050 | 1004-Lng-A-T | 53   | chr15:66463950-66464050 |

**Table S2: SB Insertion regions**

|       |          |          |              |      |                         |
|-------|----------|----------|--------------|------|-------------------------|
| chr15 | 66464450 | 66464550 | 901-Lng-B-T  | 220  | chr15:66464450-66464550 |
| chr15 | 66466250 | 66466350 | 846-Lng-A-T  | 89   | chr15:66466250-66466350 |
| chr15 | 66466550 | 66466650 | 1223-Lng-C-T | 151  | chr15:66466550-66466650 |
| chr15 | 66476550 | 66476650 | 1065-Lng-B-T | 2251 | chr15:66476550-66476650 |
| chr15 | 66476750 | 66476850 | 1065-Lng-A-T | 51   | chr15:66476750-66476850 |
| chr15 | 66533450 | 66533550 | 846-Lng-A-T  | 209  | chr15:66533450-66533550 |
| chr15 | 66541350 | 66541450 | 1065-Lng-A-T | 65   | chr15:66541350-66541450 |
| chr15 | 66546050 | 66546150 | 1065-Lng-A-T | 75   | chr15:66546050-66546150 |
| chr15 | 66546850 | 66546950 | 901-Lng-A-T  | 65   | chr15:66546850-66546950 |
| chr15 | 66552250 | 66552350 | 1090-Lng-A-T | 63   | chr15:66552250-66552350 |
| chr15 | 66563650 | 66563750 | 901-Lng-C-T  | 176  | chr15:66563650-66563750 |
| chr15 | 66581750 | 66581850 | 901-Lng-A-T  | 53   | chr15:66581750-66581850 |
| chr15 | 66583250 | 66583350 | 1223-Lng-C-T | 43   | chr15:66583250-66583350 |
| chr15 | 66620050 | 66620150 | 901-Lng-C-T  | 75   | chr15:66620050-66620150 |
| chr15 | 66696350 | 66696450 | 1090-Lng-B-T | 477  | chr15:66696350-66696450 |
| chr15 | 66786650 | 66786750 | 1090-Lng-A-T | 96   | chr15:66786650-66786750 |
| chr15 | 66804350 | 66804450 | 1223-Lng-B-T | 271  | chr15:66804350-66804450 |
| chr15 | 66848750 | 66848850 | 1167-Lng-A-T | 92   | chr15:66848750-66848850 |
| chr15 | 66853450 | 66853550 | 1223-Lng-D-T | 46   | chr15:66853450-66853550 |
| chr15 | 66869550 | 66869650 | 1004-Lng-A-T | 977  | chr15:66869550-66869650 |
| chr15 | 66879550 | 66879650 | 1167-Lng-A-T | 54   | chr15:66879550-66879650 |
| chr15 | 66893350 | 66893450 | 901-Lng-B-T  | 39   | chr15:66893350-66893450 |
| chr15 | 66900650 | 66900750 | 901-Lng-C-T  | 81   | chr15:66900650-66900750 |
| chr15 | 66901050 | 66901150 | 1065-Lng-B-T | 66   | chr15:66901050-66901150 |
| chr15 | 66933250 | 66933350 | 1065-Lng-C-T | 97   | chr15:66933250-66933350 |
| chr15 | 66935350 | 66935450 | 901-Lng-B-T  | 123  | chr15:66935350-66935450 |
| chr15 | 66950750 | 66950850 | 901-Lng-B-T  | 36   | chr15:66950750-66950850 |
| chr15 | 66955650 | 66955750 | 1274-Lng-A-T | 74   | chr15:66955650-66955750 |
| chr15 | 66969250 | 66969350 | 1188-Lng-A-T | 36   | chr15:66969250-66969350 |
| chr15 | 66983350 | 66983450 | 1151-Lng-A-T | 366  | chr15:66983350-66983450 |
| chr15 | 67028750 | 67028850 | 1274-Lng-A-T | 57   | chr15:67028750-67028850 |
| chr15 | 67058650 | 67058750 | 1065-Lng-A-T | 96   | chr15:67058650-67058750 |
| chr15 | 67097250 | 67097350 | 1065-Lng-A-T | 95   | chr15:67097250-67097350 |
| chr15 | 67176950 | 67177050 | 1223-Lng-A-T | 55   | chr15:67176950-67177050 |
| chr15 | 67190250 | 67190350 | 1065-Lng-C-T | 94   | chr15:67190250-67190350 |
| chr15 | 67219850 | 67219950 | 1152-Lng-A-T | 192  | chr15:67219850-67219950 |
| chr15 | 67221750 | 67221850 | 1065-Lng-B-T | 166  | chr15:67221750-67221850 |
| chr15 | 67247650 | 67247750 | 1004-Lng-A-T | 75   | chr15:67247650-67247750 |
| chr15 | 67258150 | 67258250 | 1065-Lng-B-T | 54   | chr15:67258150-67258250 |
| chr15 | 67266050 | 67266150 | 1065-Lng-A-T | 72   | chr15:67266050-67266150 |
| chr15 | 67273450 | 67273550 | 1223-Lng-D-T | 510  | chr15:67273450-67273550 |
| chr15 | 67342150 | 67342250 | 1072-Lng-A-T | 125  | chr15:67342150-67342250 |
| chr15 | 67353850 | 67353950 | 1065-Lng-B-T | 64   | chr15:67353850-67353950 |
| chr15 | 67388750 | 67388850 | 1065-Lng-A-T | 63   | chr15:67388750-67388850 |
| chr15 | 67402150 | 67402250 | 1004-Lng-A-T | 50   | chr15:67402150-67402250 |
| chr15 | 67422250 | 67422350 | 901-Lng-B-T  | 216  | chr15:67422250-67422350 |



**Table S2: SB Insertion regions**

|       |          |          |              |     |                         |
|-------|----------|----------|--------------|-----|-------------------------|
| chr15 | 67455350 | 67455450 | 901-Lng-B-T  | 215 | chr15:67455350-67455450 |
| chr15 | 67462150 | 67462250 | 1072-Lng-A-T | 171 | chr15:67462150-67462250 |
| chr15 | 67488750 | 67488850 | 1152-Lng-A-T | 60  | chr15:67488750-67488850 |
| chr15 | 67628450 | 67628550 | 1065-Lng-B-T | 72  | chr15:67628450-67628550 |
| chr15 | 67676850 | 67676950 | 1065-Lng-B-T | 53  | chr15:67676850-67676950 |
| chr15 | 67734650 | 67734750 | 1152-Lng-A-T | 80  | chr15:67734650-67734750 |
| chr15 | 67756750 | 67756850 | 901-Lng-A-T  | 194 | chr15:67756750-67756850 |
| chr15 | 67760450 | 67760550 | 1065-Lng-A-T | 60  | chr15:67760450-67760550 |
| chr15 | 67766450 | 67766550 | 901-Lng-C-T  | 35  | chr15:67766450-67766550 |
| chr15 | 67768950 | 67769050 | 1167-Lng-A-T | 102 | chr15:67768950-67769050 |
| chr15 | 67786550 | 67786650 | 1004-Lng-A-T | 179 | chr15:67786550-67786650 |
| chr15 | 67924850 | 67924950 | 901-Lng-C-T  | 53  | chr15:67924850-67924950 |
| chr15 | 67940750 | 67940850 | 1223-Lng-C-T | 628 | chr15:67940750-67940850 |
| chr15 | 67940750 | 67940850 | 901-Lng-A-T  | 164 | chr15:67940750-67940850 |
| chr15 | 67948950 | 67949050 | 1100-Lng-A-T | 78  | chr15:67948950-67949050 |
| chr15 | 67953050 | 67953150 | 901-Lng-B-T  | 113 | chr15:67953050-67953150 |
| chr15 | 67967350 | 67967450 | 1072-Lng-A-T | 76  | chr15:67967350-67967450 |
| chr15 | 67981650 | 67981750 | 1223-Lng-C-T | 243 | chr15:67981650-67981750 |
| chr15 | 67999050 | 67999150 | 1065-Lng-B-T | 163 | chr15:67999050-67999150 |
| chr15 | 68008350 | 68008450 | 1167-Lng-A-T | 215 | chr15:68008350-68008450 |
| chr15 | 68046050 | 68046150 | 1090-Lng-A-T | 97  | chr15:68046050-68046150 |
| chr15 | 68051750 | 68051850 | 1065-Lng-A-T | 45  | chr15:68051750-68051850 |
| chr15 | 68052250 | 68052350 | 901-Lng-A-T  | 118 | chr15:68052250-68052350 |
| chr15 | 68052750 | 68052850 | 1090-Lng-A-T | 143 | chr15:68052750-68052850 |
| chr15 | 68074750 | 68074850 | 1004-Lng-A-T | 59  | chr15:68074750-68074850 |
| chr15 | 68083750 | 68083850 | 1090-Lng-A-T | 53  | chr15:68083750-68083850 |
| chr15 | 68128450 | 68128550 | 1090-Lng-B-T | 215 | chr15:68128450-68128550 |
| chr15 | 68134650 | 68134750 | 1065-Lng-A-T | 113 | chr15:68134650-68134750 |
| chr15 | 68155050 | 68155150 | 1090-Lng-B-T | 207 | chr15:68155050-68155150 |
| chr15 | 68156750 | 68156850 | 1167-Lng-A-T | 66  | chr15:68156750-68156850 |
| chr15 | 68158950 | 68159050 | 1274-Lng-A-T | 160 | chr15:68158950-68159050 |
| chr15 | 68170950 | 68171050 | 1065-Lng-B-T | 50  | chr15:68170950-68171050 |
| chr15 | 68175550 | 68175650 | 1223-Lng-D-T | 71  | chr15:68175550-68175650 |
| chr15 | 68180750 | 68180850 | 1274-Lng-A-T | 62  | chr15:68180750-68180850 |
| chr15 | 68186050 | 68186150 | 1090-Lng-A-T | 131 | chr15:68186050-68186150 |
| chr15 | 68186450 | 68186550 | 1090-Lng-B-T | 80  | chr15:68186450-68186550 |
| chr15 | 68192550 | 68192650 | 1090-Lng-B-T | 390 | chr15:68192550-68192650 |
| chr15 | 68213750 | 68213850 | 1223-Lng-C-T | 46  | chr15:68213750-68213850 |
| chr15 | 68217750 | 68217850 | 1072-Lng-A-T | 111 | chr15:68217750-68217850 |
| chr15 | 68224750 | 68224850 | 1072-Lng-A-T | 48  | chr15:68224750-68224850 |
| chr15 | 68241750 | 68241850 | 1065-Lng-C-T | 84  | chr15:68241750-68241850 |
| chr15 | 68350250 | 68350350 | 1065-Lng-A-T | 71  | chr15:68350250-68350350 |
| chr15 | 68352650 | 68352750 | 1223-Lng-D-T | 53  | chr15:68352650-68352750 |
| chr15 | 68367950 | 68368050 | 1090-Lng-A-T | 56  | chr15:68367950-68368050 |
| chr15 | 68417850 | 68417950 | 1065-Lng-C-T | 114 | chr15:68417850-68417950 |
| chr15 | 68432250 | 68432350 | 901-Lng-B-T  | 46  | chr15:68432250-68432350 |

**Table S2: SB Insertion regions**

|       |          |          |              |      |                         |
|-------|----------|----------|--------------|------|-------------------------|
| chr15 | 68443550 | 68443650 | 901-Lng-C-T  | 41   | chr15:68443550-68443650 |
| chr15 | 68490350 | 68490450 | 901-Lng-A-T  | 146  | chr15:68490350-68490450 |
| chr15 | 68508050 | 68508150 | 1065-Lng-B-T | 98   | chr15:68508050-68508150 |
| chr15 | 68562750 | 68562850 | 1223-Lng-A-T | 312  | chr15:68562750-68562850 |
| chr15 | 68609650 | 68609750 | 1072-Lng-A-T | 150  | chr15:68609650-68609750 |
| chr15 | 68637350 | 68637450 | 1065-Lng-C-T | 81   | chr15:68637350-68637450 |
| chr15 | 68659550 | 68659650 | 1223-Lng-A-T | 2919 | chr15:68659550-68659650 |
| chr15 | 68668050 | 68668150 | 901-Lng-C-T  | 50   | chr15:68668050-68668150 |
| chr15 | 68668350 | 68668450 | 1065-Lng-B-T | 130  | chr15:68668350-68668450 |
| chr15 | 68700050 | 68700150 | 901-Lng-D-T  | 384  | chr15:68700050-68700150 |
| chr15 | 68760350 | 68760450 | 846-Lng-A-T  | 96   | chr15:68760350-68760450 |
| chr15 | 68769250 | 68769350 | 1090-Lng-A-T | 123  | chr15:68769250-68769350 |
| chr15 | 68773750 | 68773850 | 1223-Lng-B-T | 84   | chr15:68773750-68773850 |
| chr15 | 68785350 | 68785450 | 1065-Lng-B-T | 54   | chr15:68785350-68785450 |
| chr15 | 68848550 | 68848650 | 901-Lng-D-T  | 191  | chr15:68848550-68848650 |
| chr15 | 68858850 | 68858950 | 901-Lng-D-T  | 175  | chr15:68858850-68858950 |
| chr15 | 68962650 | 68962750 | 1065-Lng-B-T | 76   | chr15:68962650-68962750 |
| chr15 | 69089650 | 69089750 | 1004-Lng-A-T | 57   | chr15:69089650-69089750 |
| chr15 | 69118350 | 69118450 | 1152-Lng-A-T | 136  | chr15:69118350-69118450 |
| chr15 | 69132150 | 69132250 | 1090-Lng-B-T | 781  | chr15:69132150-69132250 |
| chr15 | 69231350 | 69231450 | 1004-Lng-A-T | 182  | chr15:69231350-69231450 |
| chr15 | 69270750 | 69270850 | 901-Lng-A-T  | 114  | chr15:69270750-69270850 |
| chr15 | 69308350 | 69308450 | 1004-Lng-A-T | 139  | chr15:69308350-69308450 |
| chr15 | 69311850 | 69311950 | 901-Lng-A-T  | 110  | chr15:69311850-69311950 |
| chr15 | 69378550 | 69378650 | 1065-Lng-A-T | 48   | chr15:69378550-69378650 |
| chr15 | 69404850 | 69404950 | 901-Lng-B-T  | 58   | chr15:69404850-69404950 |
| chr15 | 69449850 | 69449950 | 1065-Lng-B-T | 79   | chr15:69449850-69449950 |
| chr15 | 69450950 | 69451050 | 846-Lng-A-T  | 45   | chr15:69450950-69451050 |
| chr15 | 69471550 | 69471650 | 901-Lng-C-T  | 36   | chr15:69471550-69471650 |
| chr15 | 69498450 | 69498550 | 846-Lng-A-T  | 147  | chr15:69498450-69498550 |
| chr15 | 69506550 | 69506650 | 1065-Lng-B-T | 52   | chr15:69506550-69506650 |
| chr15 | 69530350 | 69530450 | 1072-Lng-A-T | 55   | chr15:69530350-69530450 |
| chr15 | 69532950 | 69533050 | 1065-Lng-B-T | 76   | chr15:69532950-69533050 |
| chr15 | 69543650 | 69543750 | 901-Lng-D-T  | 47   | chr15:69543650-69543750 |
| chr15 | 69588450 | 69588550 | 1065-Lng-C-T | 86   | chr15:69588450-69588550 |
| chr15 | 69588550 | 69588650 | 1065-Lng-B-T | 94   | chr15:69588550-69588650 |
| chr15 | 69591350 | 69591450 | 1090-Lng-A-T | 67   | chr15:69591350-69591450 |
| chr15 | 69642250 | 69642350 | 1065-Lng-B-T | 70   | chr15:69642250-69642350 |
| chr15 | 69642850 | 69642950 | 846-Lng-A-T  | 119  | chr15:69642850-69642950 |
| chr15 | 69671150 | 69671250 | 1065-Lng-C-T | 80   | chr15:69671150-69671250 |
| chr15 | 69673050 | 69673150 | 1072-Lng-A-T | 195  | chr15:69673050-69673150 |
| chr15 | 69696050 | 69696150 | 1004-Lng-A-T | 163  | chr15:69696050-69696150 |
| chr15 | 69698450 | 69698550 | 1065-Lng-A-T | 1046 | chr15:69698450-69698550 |
| chr15 | 69721150 | 69721250 | 901-Lng-B-T  | 298  | chr15:69721150-69721250 |
| chr15 | 69733650 | 69733750 | 1065-Lng-B-T | 60   | chr15:69733650-69733750 |
| chr15 | 69754950 | 69755050 | 901-Lng-D-T  | 378  | chr15:69754950-69755050 |

**Table S2: SB Insertion regions**

|       |          |          |              |      |                         |
|-------|----------|----------|--------------|------|-------------------------|
| chr15 | 69787350 | 69787450 | 1090-Lng-A-T | 59   | chr15:69787350-69787450 |
| chr15 | 69789250 | 69789350 | 1065-Lng-B-T | 44   | chr15:69789250-69789350 |
| chr15 | 69792550 | 69792650 | 1065-Lng-A-T | 55   | chr15:69792550-69792650 |
| chr15 | 69809650 | 69809750 | 846-Lng-A-T  | 202  | chr15:69809650-69809750 |
| chr15 | 69848250 | 69848350 | 901-Lng-B-T  | 150  | chr15:69848250-69848350 |
| chr15 | 69857650 | 69857750 | 901-Lng-D-T  | 45   | chr15:69857650-69857750 |
| chr15 | 69860450 | 69860550 | 901-Lng-C-T  | 57   | chr15:69860450-69860550 |
| chr15 | 69910850 | 69910950 | 1065-Lng-C-T | 62   | chr15:69910850-69910950 |
| chr15 | 69971450 | 69971550 | 1065-Lng-B-T | 42   | chr15:69971450-69971550 |
| chr15 | 69974650 | 69974750 | 846-Lng-A-T  | 122  | chr15:69974650-69974750 |
| chr15 | 69993450 | 69993550 | 1223-Lng-D-T | 40   | chr15:69993450-69993550 |
| chr15 | 70013550 | 70013650 | 1004-Lng-A-T | 65   | chr15:70013550-70013650 |
| chr15 | 70018350 | 70018450 | 1100-Lng-A-T | 120  | chr15:70018350-70018450 |
| chr15 | 70040950 | 70041050 | 1065-Lng-C-T | 80   | chr15:70040950-70041050 |
| chr15 | 70042650 | 70042750 | 1090-Lng-A-T | 75   | chr15:70042650-70042750 |
| chr15 | 70047650 | 70047750 | 1065-Lng-B-T | 51   | chr15:70047650-70047750 |
| chr15 | 70075450 | 70075550 | 1152-Lng-A-T | 65   | chr15:70075450-70075550 |
| chr15 | 70094850 | 70094950 | 1065-Lng-A-T | 51   | chr15:70094850-70094950 |
| chr15 | 70138150 | 70138250 | 1072-Lng-A-T | 69   | chr15:70138150-70138250 |
| chr15 | 70198550 | 70198650 | 1004-Lng-A-T | 105  | chr15:70198550-70198650 |
| chr15 | 70211650 | 70211750 | 1004-Lng-A-T | 127  | chr15:70211650-70211750 |
| chr15 | 70309150 | 70309250 | 1065-Lng-B-T | 49   | chr15:70309150-70309250 |
| chr15 | 70329550 | 70329650 | 1065-Lng-A-T | 81   | chr15:70329550-70329650 |
| chr15 | 70414350 | 70414450 | 1004-Lng-A-T | 85   | chr15:70414350-70414450 |
| chr15 | 70445950 | 70446050 | 1072-Lng-A-T | 55   | chr15:70445950-70446050 |
| chr15 | 70457550 | 70457650 | 1151-Lng-A-T | 143  | chr15:70457550-70457650 |
| chr15 | 70469250 | 70469350 | 901-Lng-C-T  | 51   | chr15:70469250-70469350 |
| chr15 | 70543050 | 70543150 | 1004-Lng-A-T | 243  | chr15:70543050-70543150 |
| chr15 | 70543650 | 70543750 | 1065-Lng-C-T | 63   | chr15:70543650-70543750 |
| chr15 | 70569350 | 70569450 | 1072-Lng-A-T | 55   | chr15:70569350-70569450 |
| chr15 | 70629750 | 70629850 | 1065-Lng-C-T | 69   | chr15:70629750-70629850 |
| chr15 | 70665550 | 70665650 | 1004-Lng-A-T | 575  | chr15:70665550-70665650 |
| chr15 | 70666250 | 70666350 | 1065-Lng-B-T | 47   | chr15:70666250-70666350 |
| chr15 | 70704050 | 70704150 | 1004-Lng-A-T | 51   | chr15:70704050-70704150 |
| chr15 | 70716150 | 70716250 | 1004-Lng-A-T | 113  | chr15:70716150-70716250 |
| chr15 | 70718050 | 70718150 | 1004-Lng-A-T | 78   | chr15:70718050-70718150 |
| chr15 | 70721350 | 70721450 | 1090-Lng-A-T | 1187 | chr15:70721350-70721450 |
| chr15 | 70723750 | 70723850 | 1004-Lng-A-T | 52   | chr15:70723750-70723850 |
| chr15 | 70732350 | 70732450 | 1004-Lng-A-T | 69   | chr15:70732350-70732450 |
| chr15 | 70739150 | 70739250 | 1004-Lng-A-T | 94   | chr15:70739150-70739250 |
| chr15 | 70741150 | 70741250 | 1065-Lng-A-T | 41   | chr15:70741150-70741250 |
| chr15 | 70745150 | 70745250 | 1004-Lng-A-T | 49   | chr15:70745150-70745250 |
| chr15 | 70766650 | 70766750 | 901-Lng-A-T  | 65   | chr15:70766650-70766750 |
| chr15 | 70777150 | 70777250 | 1004-Lng-A-T | 615  | chr15:70777150-70777250 |
| chr15 | 70787150 | 70787250 | 1065-Lng-B-T | 73   | chr15:70787150-70787250 |
| chr15 | 70812550 | 70812650 | 1072-Lng-A-T | 191  | chr15:70812550-70812650 |

**Table S2: SB Insertion regions**

|       |          |          |              |      |                         |
|-------|----------|----------|--------------|------|-------------------------|
| chr15 | 70817250 | 70817350 | 1065-Lng-A-T | 57   | chr15:70817250-70817350 |
| chr15 | 70882050 | 70882150 | 901-Lng-A-T  | 62   | chr15:70882050-70882150 |
| chr15 | 70981750 | 70981850 | 1090-Lng-A-T | 81   | chr15:70981750-70981850 |
| chr15 | 70986150 | 70986250 | 1065-Lng-C-T | 77   | chr15:70986150-70986250 |
| chr15 | 70988650 | 70988750 | 1223-Lng-D-T | 42   | chr15:70988650-70988750 |
| chr15 | 71047450 | 71047550 | 1065-Lng-B-T | 46   | chr15:71047450-71047550 |
| chr15 | 71051250 | 71051350 | 1065-Lng-A-T | 37   | chr15:71051250-71051350 |
| chr15 | 71100150 | 71100250 | 1072-Lng-A-T | 52   | chr15:71100150-71100250 |
| chr15 | 71142250 | 71142350 | 1065-Lng-B-T | 53   | chr15:71142250-71142350 |
| chr15 | 71174450 | 71174550 | 846-Lng-A-T  | 62   | chr15:71174450-71174550 |
| chr15 | 71205450 | 71205550 | 901-Lng-D-T  | 309  | chr15:71205450-71205550 |
| chr15 | 71206450 | 71206550 | 1072-Lng-A-T | 66   | chr15:71206450-71206550 |
| chr15 | 71290250 | 71290350 | 1004-Lng-A-T | 111  | chr15:71290250-71290350 |
| chr15 | 71325250 | 71325350 | 1065-Lng-B-T | 54   | chr15:71325250-71325350 |
| chr15 | 71325550 | 71325650 | 1223-Lng-A-T | 144  | chr15:71325550-71325650 |
| chr15 | 71336950 | 71337050 | 1065-Lng-A-T | 59   | chr15:71336950-71337050 |
| chr15 | 71344450 | 71344550 | 1065-Lng-C-T | 93   | chr15:71344450-71344550 |
| chr15 | 71412550 | 71412650 | 1065-Lng-B-T | 49   | chr15:71412550-71412650 |
| chr15 | 71437050 | 71437150 | 1004-Lng-A-T | 84   | chr15:71437050-71437150 |
| chr15 | 71458350 | 71458450 | 1072-Lng-A-T | 60   | chr15:71458350-71458450 |
| chr15 | 71459750 | 71459850 | 1065-Lng-B-T | 50   | chr15:71459750-71459850 |
| chr15 | 71478750 | 71478850 | 901-Lng-B-T  | 120  | chr15:71478750-71478850 |
| chr15 | 71566550 | 71566650 | 846-Lng-A-T  | 91   | chr15:71566550-71566650 |
| chr15 | 71603950 | 71604050 | 1223-Lng-A-T | 214  | chr15:71603950-71604050 |
| chr15 | 71636850 | 71636950 | 1223-Lng-D-T | 150  | chr15:71636850-71636950 |
| chr15 | 71648450 | 71648550 | 1223-Lng-A-T | 1192 | chr15:71648450-71648550 |
| chr15 | 71702450 | 71702550 | 1072-Lng-A-T | 115  | chr15:71702450-71702550 |
| chr15 | 71702450 | 71702550 | 901-Lng-C-T  | 117  | chr15:71702450-71702550 |
| chr15 | 71732250 | 71732350 | 1274-Lng-A-T | 57   | chr15:71732250-71732350 |
| chr15 | 71736450 | 71736550 | 846-Lng-A-T  | 118  | chr15:71736450-71736550 |
| chr15 | 71821350 | 71821450 | 1223-Lng-B-T | 38   | chr15:71821350-71821450 |
| chr15 | 71904750 | 71904850 | 1065-Lng-A-T | 243  | chr15:71904750-71904850 |
| chr15 | 71906350 | 71906450 | 1223-Lng-B-T | 86   | chr15:71906350-71906450 |
| chr15 | 71986150 | 71986250 | 1151-Lng-A-T | 80   | chr15:71986150-71986250 |
| chr15 | 72063850 | 72063950 | 1072-Lng-A-T | 137  | chr15:72063850-72063950 |
| chr15 | 72093950 | 72094050 | 1004-Lng-A-T | 53   | chr15:72093950-72094050 |
| chr15 | 72096050 | 72096150 | 1065-Lng-B-T | 80   | chr15:72096050-72096150 |
| chr15 | 72139350 | 72139450 | 846-Lng-A-T  | 121  | chr15:72139350-72139450 |
| chr15 | 72368550 | 72368650 | 1065-Lng-B-T | 74   | chr15:72368550-72368650 |
| chr15 | 72450950 | 72451050 | 1167-Lng-A-T | 83   | chr15:72450950-72451050 |
| chr15 | 72485650 | 72485750 | 1004-Lng-A-T | 678  | chr15:72485650-72485750 |
| chr15 | 72498650 | 72498750 | 1065-Lng-A-T | 74   | chr15:72498650-72498750 |
| chr15 | 72546850 | 72546950 | 901-Lng-B-T  | 93   | chr15:72546850-72546950 |
| chr15 | 72554550 | 72554650 | 1167-Lng-A-T | 67   | chr15:72554550-72554650 |
| chr15 | 72554750 | 72554850 | 1065-Lng-A-T | 81   | chr15:72554750-72554850 |
| chr15 | 72558950 | 72559050 | 901-Lng-D-T  | 767  | chr15:72558950-72559050 |

**Table S2: SB Insertion regions**

|       |          |          |              |     |                         |
|-------|----------|----------|--------------|-----|-------------------------|
| chr15 | 72601950 | 72602050 | 1065-Lng-A-T | 44  | chr15:72601950-72602050 |
| chr15 | 72616150 | 72616250 | 1065-Lng-A-T | 75  | chr15:72616150-72616250 |
| chr15 | 72618850 | 72618950 | 1004-Lng-A-T | 79  | chr15:72618850-72618950 |
| chr15 | 72624950 | 72625050 | 901-Lng-A-T  | 91  | chr15:72624950-72625050 |
| chr15 | 72633850 | 72633950 | 1065-Lng-C-T | 64  | chr15:72633850-72633950 |
| chr15 | 72635250 | 72635350 | 1072-Lng-A-T | 63  | chr15:72635250-72635350 |
| chr15 | 72636250 | 72636350 | 1100-Lng-A-T | 96  | chr15:72636250-72636350 |
| chr15 | 72656050 | 72656150 | 846-Lng-A-T  | 153 | chr15:72656050-72656150 |
| chr15 | 72681050 | 72681150 | 1065-Lng-B-T | 56  | chr15:72681050-72681150 |
| chr15 | 72684750 | 72684850 | 1065-Lng-A-T | 48  | chr15:72684750-72684850 |
| chr15 | 72715950 | 72716050 | 1004-Lng-A-T | 82  | chr15:72715950-72716050 |
| chr15 | 72764050 | 72764150 | 901-Lng-C-T  | 29  | chr15:72764050-72764150 |
| chr15 | 72806350 | 72806450 | 846-Lng-A-T  | 52  | chr15:72806350-72806450 |
| chr15 | 72867750 | 72867850 | 1065-Lng-C-T | 65  | chr15:72867750-72867850 |
| chr15 | 72874150 | 72874250 | 1065-Lng-B-T | 64  | chr15:72874150-72874250 |
| chr15 | 72941350 | 72941450 | 1004-Lng-A-T | 59  | chr15:72941350-72941450 |
| chr15 | 72986250 | 72986350 | 1090-Lng-A-T | 62  | chr15:72986250-72986350 |
| chr15 | 72986550 | 72986650 | 1223-Lng-B-T | 35  | chr15:72986550-72986650 |
| chr15 | 72993950 | 72994050 | 1152-Lng-A-T | 31  | chr15:72993950-72994050 |
| chr15 | 72994050 | 72994150 | 1065-Lng-B-T | 48  | chr15:72994050-72994150 |
| chr15 | 73017150 | 73017250 | 1274-Lng-A-T | 156 | chr15:73017150-73017250 |
| chr15 | 73033050 | 73033150 | 1274-Lng-A-T | 105 | chr15:73033050-73033150 |
| chr15 | 73040550 | 73040650 | 1065-Lng-C-T | 64  | chr15:73040550-73040650 |
| chr15 | 73049850 | 73049950 | 846-Lng-A-T  | 102 | chr15:73049850-73049950 |
| chr15 | 73108250 | 73108350 | 1072-Lng-A-T | 50  | chr15:73108250-73108350 |
| chr15 | 73124450 | 73124550 | 1065-Lng-B-T | 89  | chr15:73124450-73124550 |
| chr15 | 73144750 | 73144850 | 1090-Lng-A-T | 61  | chr15:73144750-73144850 |
| chr15 | 73150850 | 73150950 | 1090-Lng-A-T | 76  | chr15:73150850-73150950 |
| chr15 | 73154550 | 73154650 | 846-Lng-A-T  | 111 | chr15:73154550-73154650 |
| chr15 | 73156450 | 73156550 | 1274-Lng-A-T | 115 | chr15:73156450-73156550 |
| chr15 | 73177350 | 73177450 | 901-Lng-C-T  | 29  | chr15:73177350-73177450 |
| chr15 | 73196650 | 73196750 | 901-Lng-A-T  | 58  | chr15:73196650-73196750 |
| chr15 | 73215350 | 73215450 | 1223-Lng-A-T | 127 | chr15:73215350-73215450 |
| chr15 | 73218850 | 73218950 | 1167-Lng-A-T | 190 | chr15:73218850-73218950 |
| chr15 | 73219250 | 73219350 | 1223-Lng-A-T | 238 | chr15:73219250-73219350 |
| chr15 | 73223050 | 73223150 | 1100-Lng-A-T | 85  | chr15:73223050-73223150 |
| chr15 | 73224350 | 73224450 | 1072-Lng-A-T | 60  | chr15:73224350-73224450 |
| chr15 | 73230250 | 73230350 | 901-Lng-A-T  | 139 | chr15:73230250-73230350 |
| chr15 | 73245550 | 73245650 | 1090-Lng-B-T | 870 | chr15:73245550-73245650 |
| chr15 | 73338250 | 73338350 | 1065-Lng-A-T | 53  | chr15:73338250-73338350 |
| chr15 | 73343550 | 73343650 | 1151-Lng-A-T | 307 | chr15:73343550-73343650 |
| chr15 | 73351450 | 73351550 | 1274-Lng-A-T | 77  | chr15:73351450-73351550 |
| chr15 | 73358450 | 73358550 | 901-Lng-A-T  | 73  | chr15:73358450-73358550 |
| chr15 | 73466850 | 73466950 | 901-Lng-C-T  | 60  | chr15:73466850-73466950 |
| chr15 | 73478650 | 73478750 | 1090-Lng-A-T | 100 | chr15:73478650-73478750 |
| chr15 | 73516550 | 73516650 | 1065-Lng-B-T | 120 | chr15:73516550-73516650 |

**Table S2: SB Insertion regions**

|       |          |          |              |      |                         |
|-------|----------|----------|--------------|------|-------------------------|
| chr15 | 73650950 | 73651050 | 1223-Lng-A-T | 58   | chr15:73650950-73651050 |
| chr15 | 73785050 | 73785150 | 901-Lng-C-T  | 61   | chr15:73785050-73785150 |
| chr15 | 73791950 | 73792050 | 1065-Lng-C-T | 90   | chr15:73791950-73792050 |
| chr15 | 73894950 | 73895050 | 1274-Lng-A-T | 98   | chr15:73894950-73895050 |
| chr15 | 73964650 | 73964750 | 1223-Lng-D-T | 41   | chr15:73964650-73964750 |
| chr15 | 74016550 | 74016650 | 846-Lng-A-T  | 156  | chr15:74016550-74016650 |
| chr15 | 74172150 | 74172250 | 1223-Lng-A-T | 326  | chr15:74172150-74172250 |
| chr15 | 74233350 | 74233450 | 1065-Lng-A-T | 77   | chr15:74233350-74233450 |
| chr15 | 74291650 | 74291750 | 1151-Lng-A-T | 66   | chr15:74291650-74291750 |
| chr15 | 74295950 | 74296050 | 901-Lng-A-T  | 52   | chr15:74295950-74296050 |
| chr15 | 74298550 | 74298650 | 1072-Lng-A-T | 89   | chr15:74298550-74298650 |
| chr15 | 74363050 | 74363150 | 1090-Lng-A-T | 79   | chr15:74363050-74363150 |
| chr15 | 74580650 | 74580750 | 901-Lng-C-T  | 116  | chr15:74580650-74580750 |
| chr15 | 74596450 | 74596550 | 901-Lng-C-T  | 44   | chr15:74596450-74596550 |
| chr15 | 74617550 | 74617650 | 1065-Lng-B-T | 81   | chr15:74617550-74617650 |
| chr15 | 74618750 | 74618850 | 1188-Lng-A-T | 50   | chr15:74618750-74618850 |
| chr15 | 74637650 | 74637750 | 1274-Lng-A-T | 110  | chr15:74637650-74637750 |
| chr15 | 74676250 | 74676350 | 1223-Lng-C-T | 56   | chr15:74676250-74676350 |
| chr15 | 74696550 | 74696650 | 1090-Lng-A-T | 53   | chr15:74696550-74696650 |
| chr15 | 74700550 | 74700650 | 1004-Lng-A-T | 95   | chr15:74700550-74700650 |
| chr15 | 74751050 | 74751150 | 901-Lng-B-T  | 140  | chr15:74751050-74751150 |
| chr15 | 74877050 | 74877150 | 1090-Lng-B-T | 463  | chr15:74877050-74877150 |
| chr15 | 74878150 | 74878250 | 1090-Lng-A-T | 330  | chr15:74878150-74878250 |
| chr15 | 74890850 | 74890950 | 1065-Lng-B-T | 45   | chr15:74890850-74890950 |
| chr15 | 74929950 | 74930050 | 846-Lng-A-T  | 101  | chr15:74929950-74930050 |
| chr15 | 74961650 | 74961750 | 901-Lng-C-T  | 41   | chr15:74961650-74961750 |
| chr15 | 74992150 | 74992250 | 901-Lng-C-T  | 29   | chr15:74992150-74992250 |
| chr15 | 75068650 | 75068750 | 1223-Lng-A-T | 155  | chr15:75068650-75068750 |
| chr15 | 75081650 | 75081750 | 1072-Lng-A-T | 133  | chr15:75081650-75081750 |
| chr15 | 75104850 | 75104950 | 1223-Lng-A-T | 66   | chr15:75104850-75104950 |
| chr15 | 75121250 | 75121350 | 1065-Lng-A-T | 48   | chr15:75121250-75121350 |
| chr15 | 75258050 | 75258150 | 1223-Lng-B-T | 51   | chr15:75258050-75258150 |
| chr15 | 75329950 | 75330050 | 901-Lng-A-T  | 390  | chr15:75329950-75330050 |
| chr15 | 75523950 | 75524050 | 1223-Lng-A-T | 150  | chr15:75523950-75524050 |
| chr15 | 75610450 | 75610550 | 1090-Lng-A-T | 76   | chr15:75610450-75610550 |
| chr15 | 75691950 | 75692050 | 1188-Lng-A-T | 163  | chr15:75691950-75692050 |
| chr15 | 75759050 | 75759150 | 1100-Lng-A-T | 87   | chr15:75759050-75759150 |
| chr15 | 75858250 | 75858350 | 1065-Lng-C-T | 1718 | chr15:75858250-75858350 |
| chr15 | 75971350 | 75971450 | 901-Lng-A-T  | 318  | chr15:75971350-75971450 |
| chr15 | 76003950 | 76004050 | 1223-Lng-A-T | 106  | chr15:76003950-76004050 |
| chr15 | 76051150 | 76051250 | 901-Lng-B-T  | 172  | chr15:76051150-76051250 |
| chr15 | 76172350 | 76172450 | 901-Lng-B-T  | 91   | chr15:76172350-76172450 |
| chr15 | 76255550 | 76255650 | 1090-Lng-B-T | 209  | chr15:76255550-76255650 |
| chr15 | 76285750 | 76285850 | 1152-Lng-A-T | 66   | chr15:76285750-76285850 |
| chr15 | 76512450 | 76512550 | 1100-Lng-A-T | 52   | chr15:76512450-76512550 |
| chr15 | 76576950 | 76577050 | 1223-Lng-A-T | 54   | chr15:76576950-76577050 |

**Table S2: SB Insertion regions**

|       |          |          |              |     |                         |
|-------|----------|----------|--------------|-----|-------------------------|
| chr15 | 76585950 | 76586050 | 901-Lng-B-T  | 249 | chr15:76585950-76586050 |
| chr15 | 76591350 | 76591450 | 1274-Lng-A-T | 77  | chr15:76591350-76591450 |
| chr15 | 76768350 | 76768450 | 1152-Lng-A-T | 170 | chr15:76768350-76768450 |
| chr15 | 76856550 | 76856650 | 901-Lng-A-T  | 55  | chr15:76856550-76856650 |
| chr15 | 76856550 | 76856650 | 901-Lng-C-T  | 63  | chr15:76856550-76856650 |
| chr15 | 76927150 | 76927250 | 1100-Lng-A-T | 57  | chr15:76927150-76927250 |
| chr15 | 76954350 | 76954450 | 1004-Lng-A-T | 138 | chr15:76954350-76954450 |
| chr15 | 76961750 | 76961850 | 1152-Lng-A-T | 80  | chr15:76961750-76961850 |
| chr15 | 76968750 | 76968850 | 1100-Lng-A-T | 82  | chr15:76968750-76968850 |
| chr15 | 76981650 | 76981750 | 1274-Lng-A-T | 192 | chr15:76981650-76981750 |
| chr15 | 76987950 | 76988050 | 1167-Lng-A-T | 71  | chr15:76987950-76988050 |
| chr15 | 77048750 | 77048850 | 1223-Lng-A-T | 673 | chr15:77048750-77048850 |
| chr15 | 77062550 | 77062650 | 1065-Lng-B-T | 64  | chr15:77062550-77062650 |
| chr15 | 77066650 | 77066750 | 1223-Lng-B-T | 39  | chr15:77066650-77066750 |
| chr15 | 77072050 | 77072150 | 1065-Lng-C-T | 76  | chr15:77072050-77072150 |
| chr15 | 77073950 | 77074050 | 1167-Lng-A-T | 138 | chr15:77073950-77074050 |
| chr15 | 77075050 | 77075150 | 1004-Lng-A-T | 96  | chr15:77075050-77075150 |
| chr15 | 77075050 | 77075150 | 1090-Lng-A-T | 93  | chr15:77075050-77075150 |
| chr15 | 77121350 | 77121450 | 1223-Lng-A-T | 103 | chr15:77121350-77121450 |
| chr15 | 77125950 | 77126050 | 1065-Lng-B-T | 51  | chr15:77125950-77126050 |
| chr15 | 77246050 | 77246150 | 1090-Lng-A-T | 46  | chr15:77246050-77246150 |
| chr15 | 77337950 | 77338050 | 1167-Lng-A-T | 46  | chr15:77337950-77338050 |
| chr15 | 77530550 | 77530650 | 901-Lng-A-T  | 384 | chr15:77530550-77530650 |
| chr15 | 77603450 | 77603550 | 1090-Lng-B-T | 607 | chr15:77603450-77603550 |
| chr15 | 77606850 | 77606950 | 1152-Lng-A-T | 71  | chr15:77606850-77606950 |
| chr15 | 77625050 | 77625150 | 1065-Lng-B-T | 51  | chr15:77625050-77625150 |
| chr15 | 77688850 | 77688950 | 1167-Lng-A-T | 97  | chr15:77688850-77688950 |
| chr15 | 77763650 | 77763750 | 1065-Lng-B-T | 49  | chr15:77763650-77763750 |
| chr15 | 77798450 | 77798550 | 1188-Lng-A-T | 178 | chr15:77798450-77798550 |
| chr15 | 77852950 | 77853050 | 1065-Lng-C-T | 87  | chr15:77852950-77853050 |
| chr15 | 77879150 | 77879250 | 1065-Lng-C-T | 341 | chr15:77879150-77879250 |
| chr15 | 78032250 | 78032350 | 1072-Lng-A-T | 88  | chr15:78032250-78032350 |
| chr15 | 78159850 | 78159950 | 1100-Lng-A-T | 99  | chr15:78159850-78159950 |
| chr15 | 78180250 | 78180350 | 846-Lng-A-T  | 138 | chr15:78180250-78180350 |
| chr15 | 78203350 | 78203450 | 1274-Lng-A-T | 78  | chr15:78203350-78203450 |
| chr15 | 78222750 | 78222850 | 1223-Lng-D-T | 41  | chr15:78222750-78222850 |
| chr15 | 78231450 | 78231550 | 1065-Lng-A-T | 101 | chr15:78231450-78231550 |
| chr15 | 78315850 | 78315950 | 1223-Lng-A-T | 176 | chr15:78315850-78315950 |
| chr15 | 78527450 | 78527550 | 1065-Lng-B-T | 61  | chr15:78527450-78527550 |
| chr15 | 78636050 | 78636150 | 1223-Lng-B-T | 46  | chr15:78636050-78636150 |
| chr15 | 78703050 | 78703150 | 1223-Lng-A-T | 123 | chr15:78703050-78703150 |
| chr15 | 78768750 | 78768850 | 1065-Lng-B-T | 89  | chr15:78768750-78768850 |
| chr15 | 79123150 | 79123250 | 1065-Lng-C-T | 79  | chr15:79123150-79123250 |
| chr15 | 79229750 | 79229850 | 1065-Lng-B-T | 65  | chr15:79229750-79229850 |
| chr15 | 79254550 | 79254650 | 1167-Lng-A-T | 76  | chr15:79254550-79254650 |
| chr15 | 79271150 | 79271250 | 846-Lng-A-T  | 160 | chr15:79271150-79271250 |

**Table S2: SB Insertion regions**

|       |          |          |              |       |                         |
|-------|----------|----------|--------------|-------|-------------------------|
| chr15 | 79285550 | 79285650 | 1223-Lng-D-T | 50    | chr15:79285550-79285650 |
| chr15 | 79365750 | 79365850 | 1065-Lng-A-T | 82    | chr15:79365750-79365850 |
| chr15 | 79374350 | 79374450 | 1188-Lng-A-T | 65    | chr15:79374350-79374450 |
| chr15 | 79630650 | 79630750 | 1223-Lng-B-T | 372   | chr15:79630650-79630750 |
| chr15 | 79738750 | 79738850 | 1072-Lng-A-T | 58    | chr15:79738750-79738850 |
| chr15 | 79763450 | 79763550 | 1090-Lng-A-T | 67    | chr15:79763450-79763550 |
| chr15 | 79956750 | 79956850 | 1065-Lng-C-T | 83    | chr15:79956750-79956850 |
| chr15 | 80019150 | 80019250 | 1090-Lng-B-T | 76    | chr15:80019150-80019250 |
| chr15 | 80065750 | 80065850 | 1065-Lng-C-T | 87    | chr15:80065750-80065850 |
| chr15 | 80077850 | 80077950 | 1065-Lng-B-T | 102   | chr15:80077850-80077950 |
| chr15 | 80084650 | 80084750 | 1223-Lng-A-T | 1069  | chr15:80084650-80084750 |
| chr15 | 80309750 | 80309850 | 1072-Lng-A-T | 51    | chr15:80309750-80309850 |
| chr15 | 80491450 | 80491550 | 1072-Lng-A-T | 50    | chr15:80491450-80491550 |
| chr15 | 80534350 | 80534450 | 901-Lng-D-T  | 75    | chr15:80534350-80534450 |
| chr15 | 80551950 | 80552050 | 1090-Lng-A-T | 130   | chr15:80551950-80552050 |
| chr15 | 80555450 | 80555550 | 1004-Lng-A-T | 1037  | chr15:80555450-80555550 |
| chr15 | 80573350 | 80573450 | 1223-Lng-A-T | 226   | chr15:80573350-80573450 |
| chr15 | 80605850 | 80605950 | 1065-Lng-B-T | 51    | chr15:80605850-80605950 |
| chr15 | 80614350 | 80614450 | 901-Lng-D-T  | 233   | chr15:80614350-80614450 |
| chr15 | 80617950 | 80618050 | 901-Lng-A-T  | 67    | chr15:80617950-80618050 |
| chr15 | 80634950 | 80635050 | 1223-Lng-B-T | 43    | chr15:80634950-80635050 |
| chr15 | 80635050 | 80635150 | 1065-Lng-A-T | 75    | chr15:80635050-80635150 |
| chr15 | 80659450 | 80659550 | 1188-Lng-A-T | 100   | chr15:80659450-80659550 |
| chr15 | 80681250 | 80681350 | 1090-Lng-B-T | 319   | chr15:80681250-80681350 |
| chr15 | 80695850 | 80695950 | 846-Lng-A-T  | 494   | chr15:80695850-80695950 |
| chr15 | 80719350 | 80719450 | 901-Lng-D-T  | 145   | chr15:80719350-80719450 |
| chr15 | 80723050 | 80723150 | 1223-Lng-A-T | 178   | chr15:80723050-80723150 |
| chr15 | 80751150 | 80751250 | 1004-Lng-A-T | 53    | chr15:80751150-80751250 |
| chr15 | 80770950 | 80771050 | 1065-Lng-B-T | 42    | chr15:80770950-80771050 |
| chr15 | 80811950 | 80812050 | 1004-Lng-A-T | 71    | chr15:80811950-80812050 |
| chr15 | 80816450 | 80816550 | 1065-Lng-B-T | 50    | chr15:80816450-80816550 |
| chr15 | 80818250 | 80818350 | 1100-Lng-A-T | 64    | chr15:80818250-80818350 |
| chr15 | 80841750 | 80841850 | 1167-Lng-A-T | 73    | chr15:80841750-80841850 |
| chr15 | 80901050 | 80901150 | 901-Lng-C-T  | 71    | chr15:80901050-80901150 |
| chr15 | 80909450 | 80909550 | 1167-Lng-A-T | 59    | chr15:80909450-80909550 |
| chr15 | 80928350 | 80928450 | 1100-Lng-A-T | 89    | chr15:80928350-80928450 |
| chr15 | 80938550 | 80938650 | 1152-Lng-A-T | 57    | chr15:80938550-80938650 |
| chr15 | 80942150 | 80942250 | 1223-Lng-D-T | 58    | chr15:80942150-80942250 |
| chr15 | 80960350 | 80960450 | 1223-Lng-C-T | 71    | chr15:80960350-80960450 |
| chr15 | 80960450 | 80960550 | 1223-Lng-C-T | 151   | chr15:80960450-80960550 |
| chr15 | 81007250 | 81007350 | 1065-Lng-C-T | 12353 | chr15:81007250-81007350 |
| chr15 | 81218950 | 81219050 | 1223-Lng-C-T | 45    | chr15:81218950-81219050 |
| chr15 | 81250250 | 81250350 | 1065-Lng-A-T | 49    | chr15:81250250-81250350 |
| chr15 | 81252450 | 81252550 | 1072-Lng-A-T | 134   | chr15:81252450-81252550 |
| chr15 | 81348950 | 81349050 | 901-Lng-D-T  | 1101  | chr15:81348950-81349050 |
| chr15 | 81408450 | 81408550 | 901-Lng-B-T  | 156   | chr15:81408450-81408550 |



**Table S2: SB Insertion regions**

|       |          |          |              |     |                         |
|-------|----------|----------|--------------|-----|-------------------------|
| chr15 | 81469650 | 81469750 | 1223-Lng-B-T | 65  | chr15:81469650-81469750 |
| chr15 | 81533550 | 81533650 | 901-Lng-A-T  | 77  | chr15:81533550-81533650 |
| chr15 | 81561650 | 81561750 | 1065-Lng-A-T | 35  | chr15:81561650-81561750 |
| chr15 | 81574750 | 81574850 | 1065-Lng-B-T | 48  | chr15:81574750-81574850 |
| chr15 | 81581050 | 81581150 | 901-Lng-C-T  | 60  | chr15:81581050-81581150 |
| chr15 | 81590050 | 81590150 | 901-Lng-A-T  | 85  | chr15:81590050-81590150 |
| chr15 | 81592150 | 81592250 | 1072-Lng-A-T | 238 | chr15:81592150-81592250 |
| chr15 | 81600050 | 81600150 | 901-Lng-B-T  | 107 | chr15:81600050-81600150 |
| chr15 | 81612750 | 81612850 | 901-Lng-A-T  | 175 | chr15:81612750-81612850 |
| chr15 | 81669850 | 81669950 | 1065-Lng-A-T | 64  | chr15:81669850-81669950 |
| chr15 | 81708950 | 81709050 | 901-Lng-B-T  | 43  | chr15:81708950-81709050 |
| chr15 | 81786550 | 81786650 | 1072-Lng-A-T | 108 | chr15:81786550-81786650 |
| chr15 | 81828850 | 81828950 | 1223-Lng-A-T | 138 | chr15:81828850-81828950 |
| chr15 | 81836950 | 81837050 | 1223-Lng-B-T | 35  | chr15:81836950-81837050 |
| chr15 | 81867550 | 81867650 | 901-Lng-B-T  | 50  | chr15:81867550-81867650 |
| chr15 | 81951150 | 81951250 | 1223-Lng-D-T | 115 | chr15:81951150-81951250 |
| chr15 | 81991550 | 81991650 | 1072-Lng-A-T | 55  | chr15:81991550-81991650 |
| chr15 | 81998950 | 81999050 | 1065-Lng-B-T | 46  | chr15:81998950-81999050 |
| chr15 | 81999650 | 81999750 | 1167-Lng-A-T | 82  | chr15:81999650-81999750 |
| chr15 | 82011950 | 82012050 | 1274-Lng-A-T | 83  | chr15:82011950-82012050 |
| chr15 | 82047950 | 82048050 | 901-Lng-B-T  | 101 | chr15:82047950-82048050 |
| chr15 | 82057050 | 82057150 | 846-Lng-A-T  | 66  | chr15:82057050-82057150 |
| chr15 | 82186550 | 82186650 | 1090-Lng-B-T | 349 | chr15:82186550-82186650 |
| chr15 | 82214450 | 82214550 | 901-Lng-A-T  | 82  | chr15:82214450-82214550 |
| chr15 | 82232350 | 82232450 | 1151-Lng-A-T | 65  | chr15:82232350-82232450 |
| chr15 | 82326150 | 82326250 | 901-Lng-B-T  | 43  | chr15:82326150-82326250 |
| chr15 | 82591450 | 82591550 | 1223-Lng-B-T | 71  | chr15:82591450-82591550 |
| chr15 | 82627050 | 82627150 | 1223-Lng-B-T | 173 | chr15:82627050-82627150 |
| chr15 | 82656150 | 82656250 | 1072-Lng-A-T | 49  | chr15:82656150-82656250 |
| chr15 | 82657650 | 82657750 | 1090-Lng-B-T | 479 | chr15:82657650-82657750 |
| chr15 | 82661950 | 82662050 | 1004-Lng-A-T | 129 | chr15:82661950-82662050 |
| chr15 | 82719550 | 82719650 | 1065-Lng-B-T | 104 | chr15:82719550-82719650 |
| chr15 | 82724850 | 82724950 | 1065-Lng-B-T | 50  | chr15:82724850-82724950 |
| chr15 | 82779650 | 82779750 | 846-Lng-A-T  | 115 | chr15:82779650-82779750 |
| chr15 | 82787450 | 82787550 | 1065-Lng-C-T | 72  | chr15:82787450-82787550 |
| chr15 | 82842050 | 82842150 | 1090-Lng-A-T | 49  | chr15:82842050-82842150 |
| chr15 | 82980750 | 82980850 | 901-Lng-A-T  | 139 | chr15:82980750-82980850 |
| chr15 | 82984350 | 82984450 | 901-Lng-A-T  | 93  | chr15:82984350-82984450 |
| chr15 | 83046850 | 83046950 | 901-Lng-B-T  | 96  | chr15:83046850-83046950 |
| chr15 | 83123850 | 83123950 | 901-Lng-A-T  | 136 | chr15:83123850-83123950 |
| chr15 | 83147250 | 83147350 | 1065-Lng-A-T | 55  | chr15:83147250-83147350 |
| chr15 | 83155750 | 83155850 | 1167-Lng-A-T | 413 | chr15:83155750-83155850 |
| chr15 | 83173850 | 83173950 | 1072-Lng-A-T | 111 | chr15:83173850-83173950 |
| chr15 | 83203250 | 83203350 | 1065-Lng-A-T | 448 | chr15:83203250-83203350 |
| chr15 | 83220150 | 83220250 | 846-Lng-A-T  | 94  | chr15:83220150-83220250 |
| chr15 | 83223450 | 83223550 | 1004-Lng-A-T | 54  | chr15:83223450-83223550 |

**Table S2: SB Insertion regions**

|       |          |          |              |      |                         |
|-------|----------|----------|--------------|------|-------------------------|
| chr15 | 83249250 | 83249350 | 1152-Lng-A-T | 49   | chr15:83249250-83249350 |
| chr15 | 83251150 | 83251250 | 1223-Lng-C-T | 50   | chr15:83251150-83251250 |
| chr15 | 83338950 | 83339050 | 1072-Lng-A-T | 137  | chr15:83338950-83339050 |
| chr15 | 83376350 | 83376450 | 901-Lng-A-T  | 84   | chr15:83376350-83376450 |
| chr15 | 83406350 | 83406450 | 1004-Lng-A-T | 66   | chr15:83406350-83406450 |
| chr15 | 83432550 | 83432650 | 1004-Lng-A-T | 110  | chr15:83432550-83432650 |
| chr15 | 83466250 | 83466350 | 901-Lng-B-T  | 103  | chr15:83466250-83466350 |
| chr15 | 83593550 | 83593650 | 901-Lng-C-T  | 79   | chr15:83593550-83593650 |
| chr15 | 83617450 | 83617550 | 1151-Lng-A-T | 203  | chr15:83617450-83617550 |
| chr15 | 83643750 | 83643850 | 1065-Lng-B-T | 55   | chr15:83643750-83643850 |
| chr15 | 83705750 | 83705850 | 1223-Lng-A-T | 122  | chr15:83705750-83705850 |
| chr15 | 83771850 | 83771950 | 901-Lng-C-T  | 39   | chr15:83771850-83771950 |
| chr15 | 83846850 | 83846950 | 1167-Lng-A-T | 52   | chr15:83846850-83846950 |
| chr15 | 83864950 | 83865050 | 846-Lng-A-T  | 122  | chr15:83864950-83865050 |
| chr15 | 84055550 | 84055650 | 1072-Lng-A-T | 49   | chr15:84055550-84055650 |
| chr15 | 84140450 | 84140550 | 1065-Lng-C-T | 62   | chr15:84140450-84140550 |
| chr15 | 84231650 | 84231750 | 1065-Lng-B-T | 232  | chr15:84231650-84231750 |
| chr15 | 84464350 | 84464450 | 901-Lng-D-T  | 288  | chr15:84464350-84464450 |
| chr15 | 84550850 | 84550950 | 1065-Lng-B-T | 44   | chr15:84550850-84550950 |
| chr15 | 84599550 | 84599650 | 901-Lng-A-T  | 56   | chr15:84599550-84599650 |
| chr15 | 84639150 | 84639250 | 1188-Lng-A-T | 195  | chr15:84639150-84639250 |
| chr15 | 84652650 | 84652750 | 901-Lng-A-T  | 62   | chr15:84652650-84652750 |
| chr15 | 84728250 | 84728350 | 1167-Lng-A-T | 54   | chr15:84728250-84728350 |
| chr15 | 84759650 | 84759750 | 901-Lng-A-T  | 64   | chr15:84759650-84759750 |
| chr15 | 84764750 | 84764850 | 1167-Lng-A-T | 95   | chr15:84764750-84764850 |
| chr15 | 84799950 | 84800050 | 901-Lng-A-T  | 78   | chr15:84799950-84800050 |
| chr15 | 84922750 | 84922850 | 1072-Lng-A-T | 99   | chr15:84922750-84922850 |
| chr15 | 84950750 | 84950850 | 1065-Lng-A-T | 54   | chr15:84950750-84950850 |
| chr15 | 84955150 | 84955250 | 846-Lng-A-T  | 115  | chr15:84955150-84955250 |
| chr15 | 84989350 | 84989450 | 1004-Lng-A-T | 165  | chr15:84989350-84989450 |
| chr15 | 85019750 | 85019850 | 1223-Lng-C-T | 51   | chr15:85019750-85019850 |
| chr15 | 85019950 | 85020050 | 846-Lng-A-T  | 108  | chr15:85019950-85020050 |
| chr15 | 85019950 | 85020050 | 1223-Lng-C-T | 62   | chr15:85019950-85020050 |
| chr15 | 85019950 | 85020050 | 1065-Lng-C-T | 109  | chr15:85019950-85020050 |
| chr15 | 85079850 | 85079950 | 1065-Lng-C-T | 100  | chr15:85079850-85079950 |
| chr15 | 85149250 | 85149350 | 846-Lng-A-T  | 310  | chr15:85149250-85149350 |
| chr15 | 85171350 | 85171450 | 1100-Lng-A-T | 137  | chr15:85171350-85171450 |
| chr15 | 85171750 | 85171850 | 1167-Lng-A-T | 116  | chr15:85171750-85171850 |
| chr15 | 85178450 | 85178550 | 1223-Lng-A-T | 1147 | chr15:85178450-85178550 |
| chr15 | 85180550 | 85180650 | 1065-Lng-A-T | 36   | chr15:85180550-85180650 |
| chr15 | 85193850 | 85193950 | 901-Lng-D-T  | 129  | chr15:85193850-85193950 |
| chr15 | 85195150 | 85195250 | 1065-Lng-B-T | 50   | chr15:85195150-85195250 |
| chr15 | 85207950 | 85208050 | 1065-Lng-A-T | 56   | chr15:85207950-85208050 |
| chr15 | 85211950 | 85212050 | 1100-Lng-A-T | 112  | chr15:85211950-85212050 |
| chr15 | 85259050 | 85259150 | 1072-Lng-A-T | 61   | chr15:85259050-85259150 |
| chr15 | 85260150 | 85260250 | 1065-Lng-B-T | 69   | chr15:85260150-85260250 |

**Table S2: SB Insertion regions**

|       |          |          |              |      |                         |
|-------|----------|----------|--------------|------|-------------------------|
| chr15 | 85278850 | 85278950 | 1072-Lng-A-T | 139  | chr15:85278850-85278950 |
| chr15 | 85283050 | 85283150 | 1090-Lng-B-T | 289  | chr15:85283050-85283150 |
| chr15 | 85304550 | 85304650 | 1167-Lng-A-T | 137  | chr15:85304550-85304650 |
| chr15 | 85318150 | 85318250 | 1065-Lng-B-T | 57   | chr15:85318150-85318250 |
| chr15 | 85364650 | 85364750 | 846-Lng-A-T  | 75   | chr15:85364650-85364750 |
| chr15 | 85425050 | 85425150 | 1090-Lng-A-T | 117  | chr15:85425050-85425150 |
| chr15 | 85434350 | 85434450 | 901-Lng-C-T  | 154  | chr15:85434350-85434450 |
| chr15 | 85470550 | 85470650 | 1274-Lng-A-T | 92   | chr15:85470550-85470650 |
| chr15 | 85592950 | 85593050 | 1090-Lng-B-T | 1256 | chr15:85592950-85593050 |
| chr15 | 85593550 | 85593650 | 901-Lng-B-T  | 241  | chr15:85593550-85593650 |
| chr15 | 85659350 | 85659450 | 846-Lng-A-T  | 209  | chr15:85659350-85659450 |
| chr15 | 85758150 | 85758250 | 1167-Lng-A-T | 55   | chr15:85758150-85758250 |
| chr15 | 85774250 | 85774350 | 846-Lng-A-T  | 43   | chr15:85774250-85774350 |
| chr15 | 85854650 | 85854750 | 1152-Lng-A-T | 55   | chr15:85854650-85854750 |
| chr15 | 85891250 | 85891350 | 901-Lng-A-T  | 64   | chr15:85891250-85891350 |
| chr15 | 85937450 | 85937550 | 1065-Lng-C-T | 1031 | chr15:85937450-85937550 |
| chr15 | 86010450 | 86010550 | 1223-Lng-A-T | 70   | chr15:86010450-86010550 |
| chr15 | 86052850 | 86052950 | 1065-Lng-B-T | 40   | chr15:86052850-86052950 |
| chr15 | 86061750 | 86061850 | 901-Lng-A-T  | 269  | chr15:86061750-86061850 |
| chr15 | 86104550 | 86104650 | 1065-Lng-B-T | 83   | chr15:86104550-86104650 |
| chr15 | 86161150 | 86161250 | 901-Lng-B-T  | 139  | chr15:86161150-86161250 |
| chr15 | 86237050 | 86237150 | 901-Lng-C-T  | 47   | chr15:86237050-86237150 |
| chr15 | 86242050 | 86242150 | 1072-Lng-A-T | 266  | chr15:86242050-86242150 |
| chr15 | 86256050 | 86256150 | 1167-Lng-A-T | 129  | chr15:86256050-86256150 |
| chr15 | 86256550 | 86256650 | 846-Lng-A-T  | 273  | chr15:86256550-86256650 |
| chr15 | 86285350 | 86285450 | 1072-Lng-A-T | 136  | chr15:86285350-86285450 |
| chr15 | 86305850 | 86305950 | 1065-Lng-A-T | 48   | chr15:86305850-86305950 |
| chr15 | 86330450 | 86330550 | 901-Lng-C-T  | 108  | chr15:86330450-86330550 |
| chr15 | 86595750 | 86595850 | 1090-Lng-A-T | 73   | chr15:86595750-86595850 |
| chr15 | 86661450 | 86661550 | 1223-Lng-B-T | 50   | chr15:86661450-86661550 |
| chr15 | 86714350 | 86714450 | 901-Lng-C-T  | 70   | chr15:86714350-86714450 |
| chr15 | 86776350 | 86776450 | 1072-Lng-A-T | 77   | chr15:86776350-86776450 |
| chr15 | 86813750 | 86813850 | 1065-Lng-A-T | 106  | chr15:86813750-86813850 |
| chr15 | 86922250 | 86922350 | 901-Lng-A-T  | 149  | chr15:86922250-86922350 |
| chr15 | 86925050 | 86925150 | 1223-Lng-B-T | 39   | chr15:86925050-86925150 |
| chr15 | 86936850 | 86936950 | 1065-Lng-B-T | 69   | chr15:86936850-86936950 |
| chr15 | 86954550 | 86954650 | 1072-Lng-A-T | 118  | chr15:86954550-86954650 |
| chr15 | 86994750 | 86994850 | 1188-Lng-A-T | 144  | chr15:86994750-86994850 |
| chr15 | 87050050 | 87050150 | 1065-Lng-C-T | 1267 | chr15:87050050-87050150 |
| chr15 | 87068750 | 87068850 | 901-Lng-C-T  | 49   | chr15:87068750-87068850 |
| chr15 | 87132750 | 87132850 | 1072-Lng-A-T | 125  | chr15:87132750-87132850 |
| chr15 | 87195350 | 87195450 | 1065-Lng-B-T | 89   | chr15:87195350-87195450 |
| chr15 | 87200650 | 87200750 | 1090-Lng-A-T | 101  | chr15:87200650-87200750 |
| chr15 | 87261250 | 87261350 | 901-Lng-A-T  | 62   | chr15:87261250-87261350 |
| chr15 | 87393750 | 87393850 | 846-Lng-A-T  | 70   | chr15:87393750-87393850 |
| chr15 | 87425150 | 87425250 | 1090-Lng-A-T | 60   | chr15:87425150-87425250 |

**Table S2: SB Insertion regions**

|       |          |          |              |      |                         |
|-------|----------|----------|--------------|------|-------------------------|
| chr15 | 87508250 | 87508350 | 1065-Lng-A-T | 64   | chr15:87508250-87508350 |
| chr15 | 87725250 | 87725350 | 1065-Lng-B-T | 62   | chr15:87725250-87725350 |
| chr15 | 87784850 | 87784950 | 1004-Lng-A-T | 86   | chr15:87784850-87784950 |
| chr15 | 87848250 | 87848350 | 1065-Lng-B-T | 43   | chr15:87848250-87848350 |
| chr15 | 87922650 | 87922750 | 1065-Lng-A-T | 57   | chr15:87922650-87922750 |
| chr15 | 87995850 | 87995950 | 846-Lng-A-T  | 65   | chr15:87995850-87995950 |
| chr15 | 88031850 | 88031950 | 1072-Lng-A-T | 57   | chr15:88031850-88031950 |
| chr15 | 88080250 | 88080350 | 1072-Lng-A-T | 76   | chr15:88080250-88080350 |
| chr15 | 88383250 | 88383350 | 901-Lng-B-T  | 98   | chr15:88383250-88383350 |
| chr15 | 88440850 | 88440950 | 901-Lng-A-T  | 71   | chr15:88440850-88440950 |
| chr15 | 88495450 | 88495550 | 901-Lng-B-T  | 112  | chr15:88495450-88495550 |
| chr15 | 88513050 | 88513150 | 1065-Lng-C-T | 107  | chr15:88513050-88513150 |
| chr15 | 88527550 | 88527650 | 1223-Lng-A-T | 120  | chr15:88527550-88527650 |
| chr15 | 88529750 | 88529850 | 1167-Lng-A-T | 1269 | chr15:88529750-88529850 |
| chr15 | 88533950 | 88534050 | 1065-Lng-C-T | 238  | chr15:88533950-88534050 |
| chr15 | 88534450 | 88534550 | 1152-Lng-A-T | 204  | chr15:88534450-88534550 |
| chr15 | 88537050 | 88537150 | 901-Lng-C-T  | 94   | chr15:88537050-88537150 |
| chr15 | 88539150 | 88539250 | 901-Lng-D-T  | 356  | chr15:88539150-88539250 |
| chr15 | 88590050 | 88590150 | 1065-Lng-A-T | 89   | chr15:88590050-88590150 |
| chr15 | 88597250 | 88597350 | 901-Lng-B-T  | 157  | chr15:88597250-88597350 |
| chr15 | 88599150 | 88599250 | 1065-Lng-B-T | 39   | chr15:88599150-88599250 |
| chr15 | 88599850 | 88599950 | 846-Lng-A-T  | 130  | chr15:88599850-88599950 |
| chr15 | 88602950 | 88603050 | 1090-Lng-A-T | 74   | chr15:88602950-88603050 |
| chr15 | 88710350 | 88710450 | 1090-Lng-A-T | 66   | chr15:88710350-88710450 |
| chr15 | 88794650 | 88794750 | 901-Lng-B-T  | 144  | chr15:88794650-88794750 |
| chr15 | 88794850 | 88794950 | 901-Lng-A-T  | 54   | chr15:88794850-88794950 |
| chr15 | 88841150 | 88841250 | 1090-Lng-A-T | 119  | chr15:88841150-88841250 |
| chr15 | 88877150 | 88877250 | 1065-Lng-B-T | 344  | chr15:88877150-88877250 |
| chr15 | 88928750 | 88928850 | 1004-Lng-A-T | 58   | chr15:88928750-88928850 |
| chr15 | 88962450 | 88962550 | 901-Lng-B-T  | 115  | chr15:88962450-88962550 |
| chr15 | 88984550 | 88984650 | 901-Lng-C-T  | 33   | chr15:88984550-88984650 |
| chr15 | 89005050 | 89005150 | 1152-Lng-A-T | 32   | chr15:89005050-89005150 |
| chr15 | 89048150 | 89048250 | 1100-Lng-A-T | 90   | chr15:89048150-89048250 |
| chr15 | 89058850 | 89058950 | 1100-Lng-B-T | 5084 | chr15:89058850-89058950 |
| chr15 | 89083650 | 89083750 | 1223-Lng-B-T | 34   | chr15:89083650-89083750 |
| chr15 | 89085350 | 89085450 | 1065-Lng-B-T | 68   | chr15:89085350-89085450 |
| chr15 | 89105750 | 89105850 | 1223-Lng-A-T | 246  | chr15:89105750-89105850 |
| chr15 | 89153550 | 89153650 | 901-Lng-B-T  | 70   | chr15:89153550-89153650 |
| chr15 | 89172850 | 89172950 | 901-Lng-B-T  | 38   | chr15:89172850-89172950 |
| chr15 | 89335150 | 89335250 | 901-Lng-A-T  | 81   | chr15:89335150-89335250 |
| chr15 | 89349650 | 89349750 | 1065-Lng-A-T | 53   | chr15:89349650-89349750 |
| chr15 | 89362950 | 89363050 | 1223-Lng-A-T | 138  | chr15:89362950-89363050 |
| chr15 | 89457950 | 89458050 | 1072-Lng-A-T | 60   | chr15:89457950-89458050 |
| chr15 | 89565650 | 89565750 | 1274-Lng-A-T | 87   | chr15:89565650-89565750 |
| chr15 | 89568650 | 89568750 | 1223-Lng-A-T | 206  | chr15:89568650-89568750 |
| chr15 | 89575750 | 89575850 | 1065-Lng-B-T | 144  | chr15:89575750-89575850 |

**Table S2: SB Insertion regions**

|       |          |          |              |     |                         |
|-------|----------|----------|--------------|-----|-------------------------|
| chr15 | 89595150 | 89595250 | 1065-Lng-B-T | 81  | chr15:89595150-89595250 |
| chr15 | 89645750 | 89645850 | 1004-Lng-A-T | 582 | chr15:89645750-89645850 |
| chr15 | 89670350 | 89670450 | 1065-Lng-A-T | 85  | chr15:89670350-89670450 |
| chr15 | 89696850 | 89696950 | 1004-Lng-A-T | 80  | chr15:89696850-89696950 |
| chr15 | 89739750 | 89739850 | 1223-Lng-D-T | 42  | chr15:89739750-89739850 |
| chr15 | 89755650 | 89755750 | 1167-Lng-A-T | 86  | chr15:89755650-89755750 |
| chr15 | 89765950 | 89766050 | 1223-Lng-C-T | 44  | chr15:89765950-89766050 |
| chr15 | 89823150 | 89823250 | 1090-Lng-B-T | 252 | chr15:89823150-89823250 |
| chr15 | 89833550 | 89833650 | 1065-Lng-C-T | 92  | chr15:89833550-89833650 |
| chr15 | 89837550 | 89837650 | 901-Lng-A-T  | 344 | chr15:89837550-89837650 |
| chr15 | 89893550 | 89893650 | 1090-Lng-A-T | 74  | chr15:89893550-89893650 |
| chr15 | 89909250 | 89909350 | 901-Lng-B-T  | 71  | chr15:89909250-89909350 |
| chr15 | 89937950 | 89938050 | 1065-Lng-C-T | 80  | chr15:89937950-89938050 |
| chr15 | 89994150 | 89994250 | 1065-Lng-C-T | 79  | chr15:89994150-89994250 |
| chr15 | 90046350 | 90046450 | 1065-Lng-B-T | 185 | chr15:90046350-90046450 |
| chr15 | 90048050 | 90048150 | 1167-Lng-A-T | 56  | chr15:90048050-90048150 |
| chr15 | 90060950 | 90061050 | 846-Lng-A-T  | 121 | chr15:90060950-90061050 |
| chr15 | 90113950 | 90114050 | 846-Lng-A-T  | 91  | chr15:90113950-90114050 |
| chr15 | 90150550 | 90150650 | 1065-Lng-A-T | 422 | chr15:90150550-90150650 |
| chr15 | 90152550 | 90152650 | 1065-Lng-A-T | 68  | chr15:90152550-90152650 |
| chr15 | 90185850 | 90185950 | 1072-Lng-A-T | 62  | chr15:90185850-90185950 |
| chr15 | 90274150 | 90274250 | 901-Lng-B-T  | 227 | chr15:90274150-90274250 |
| chr15 | 90279250 | 90279350 | 1072-Lng-A-T | 66  | chr15:90279250-90279350 |
| chr15 | 90311450 | 90311550 | 1065-Lng-A-T | 47  | chr15:90311450-90311550 |
| chr15 | 90318550 | 90318650 | 1004-Lng-A-T | 59  | chr15:90318550-90318650 |
| chr15 | 90323050 | 90323150 | 901-Lng-B-T  | 40  | chr15:90323050-90323150 |
| chr15 | 90348950 | 90349050 | 901-Lng-D-T  | 446 | chr15:90348950-90349050 |
| chr15 | 90422650 | 90422750 | 1223-Lng-B-T | 82  | chr15:90422650-90422750 |
| chr15 | 90425250 | 90425350 | 1004-Lng-A-T | 85  | chr15:90425250-90425350 |
| chr15 | 90430050 | 90430150 | 901-Lng-B-T  | 123 | chr15:90430050-90430150 |
| chr15 | 90435050 | 90435150 | 901-Lng-D-T  | 307 | chr15:90435050-90435150 |
| chr15 | 90481050 | 90481150 | 1167-Lng-A-T | 227 | chr15:90481050-90481150 |
| chr15 | 90562550 | 90562650 | 901-Lng-B-T  | 130 | chr15:90562550-90562650 |
| chr15 | 90582550 | 90582650 | 1072-Lng-A-T | 51  | chr15:90582550-90582650 |
| chr15 | 90618050 | 90618150 | 1065-Lng-C-T | 78  | chr15:90618050-90618150 |
| chr15 | 90627050 | 90627150 | 1152-Lng-A-T | 62  | chr15:90627050-90627150 |
| chr15 | 90646850 | 90646950 | 1004-Lng-A-T | 75  | chr15:90646850-90646950 |
| chr15 | 90761350 | 90761450 | 901-Lng-C-T  | 47  | chr15:90761350-90761450 |
| chr15 | 90784550 | 90784650 | 1072-Lng-A-T | 79  | chr15:90784550-90784650 |
| chr15 | 90804250 | 90804350 | 1065-Lng-A-T | 60  | chr15:90804250-90804350 |
| chr15 | 90816550 | 90816650 | 1167-Lng-A-T | 51  | chr15:90816550-90816650 |
| chr15 | 90830350 | 90830450 | 1004-Lng-A-T | 115 | chr15:90830350-90830450 |
| chr15 | 90832950 | 90833050 | 1065-Lng-C-T | 108 | chr15:90832950-90833050 |
| chr15 | 90847150 | 90847250 | 901-Lng-A-T  | 105 | chr15:90847150-90847250 |
| chr15 | 90847550 | 90847650 | 901-Lng-A-T  | 52  | chr15:90847550-90847650 |
| chr15 | 90849850 | 90849950 | 1004-Lng-A-T | 481 | chr15:90849850-90849950 |

**Table S2: SB Insertion regions**

|       |          |          |              |      |                         |
|-------|----------|----------|--------------|------|-------------------------|
| chr15 | 90853650 | 90853750 | 901-Lng-A-T  | 65   | chr15:90853650-90853750 |
| chr15 | 90867350 | 90867450 | 1072-Lng-A-T | 51   | chr15:90867350-90867450 |
| chr15 | 90871350 | 90871450 | 1188-Lng-A-T | 71   | chr15:90871350-90871450 |
| chr15 | 90885250 | 90885350 | 1065-Lng-C-T | 100  | chr15:90885250-90885350 |
| chr15 | 90888850 | 90888950 | 1072-Lng-A-T | 80   | chr15:90888850-90888950 |
| chr15 | 90974150 | 90974250 | 901-Lng-B-T  | 132  | chr15:90974150-90974250 |
| chr15 | 91034650 | 91034750 | 1090-Lng-A-T | 53   | chr15:91034650-91034750 |
| chr15 | 91058250 | 91058350 | 1072-Lng-A-T | 136  | chr15:91058250-91058350 |
| chr15 | 91069750 | 91069850 | 901-Lng-A-T  | 193  | chr15:91069750-91069850 |
| chr15 | 91165250 | 91165350 | 901-Lng-D-T  | 61   | chr15:91165250-91165350 |
| chr15 | 91179050 | 91179150 | 1223-Lng-A-T | 1463 | chr15:91179050-91179150 |
| chr15 | 91188450 | 91188550 | 901-Lng-A-T  | 105  | chr15:91188450-91188550 |
| chr15 | 91266250 | 91266350 | 1065-Lng-B-T | 86   | chr15:91266250-91266350 |
| chr15 | 91267150 | 91267250 | 901-Lng-B-T  | 151  | chr15:91267150-91267250 |
| chr15 | 91286750 | 91286850 | 1223-Lng-A-T | 95   | chr15:91286750-91286850 |
| chr15 | 91294350 | 91294450 | 901-Lng-B-T  | 50   | chr15:91294350-91294450 |
| chr15 | 91376050 | 91376150 | 1004-Lng-A-T | 66   | chr15:91376050-91376150 |
| chr15 | 91387150 | 91387250 | 1223-Lng-D-T | 47   | chr15:91387150-91387250 |
| chr15 | 91424050 | 91424150 | 901-Lng-D-T  | 176  | chr15:91424050-91424150 |
| chr15 | 91467550 | 91467650 | 1167-Lng-A-T | 47   | chr15:91467550-91467650 |
| chr15 | 91505250 | 91505350 | 1072-Lng-A-T | 185  | chr15:91505250-91505350 |
| chr15 | 91513950 | 91514050 | 1065-Lng-B-T | 45   | chr15:91513950-91514050 |
| chr15 | 91530250 | 91530350 | 901-Lng-A-T  | 143  | chr15:91530250-91530350 |
| chr15 | 91532750 | 91532850 | 1065-Lng-A-T | 44   | chr15:91532750-91532850 |
| chr15 | 91536550 | 91536650 | 1223-Lng-B-T | 105  | chr15:91536550-91536650 |
| chr15 | 91558350 | 91558450 | 846-Lng-A-T  | 175  | chr15:91558350-91558450 |
| chr15 | 91569850 | 91569950 | 846-Lng-A-T  | 60   | chr15:91569850-91569950 |
| chr15 | 91573850 | 91573950 | 1065-Lng-C-T | 101  | chr15:91573850-91573950 |
| chr15 | 91594450 | 91594550 | 1065-Lng-A-T | 692  | chr15:91594450-91594550 |
| chr15 | 91596950 | 91597050 | 1004-Lng-A-T | 94   | chr15:91596950-91597050 |
| chr15 | 91598950 | 91599050 | 1072-Lng-A-T | 58   | chr15:91598950-91599050 |
| chr15 | 91598950 | 91599050 | 901-Lng-A-T  | 210  | chr15:91598950-91599050 |
| chr15 | 91599050 | 91599150 | 846-Lng-A-T  | 166  | chr15:91599050-91599150 |
| chr15 | 91600550 | 91600650 | 901-Lng-A-T  | 261  | chr15:91600550-91600650 |
| chr15 | 91613250 | 91613350 | 1065-Lng-B-T | 41   | chr15:91613250-91613350 |
| chr15 | 91613250 | 91613350 | 1072-Lng-A-T | 84   | chr15:91613250-91613350 |
| chr15 | 91614650 | 91614750 | 1090-Lng-A-T | 56   | chr15:91614650-91614750 |
| chr15 | 91620950 | 91621050 | 846-Lng-A-T  | 85   | chr15:91620950-91621050 |
| chr15 | 91622050 | 91622150 | 846-Lng-A-T  | 1291 | chr15:91622050-91622150 |
| chr15 | 91633050 | 91633150 | 846-Lng-A-T  | 79   | chr15:91633050-91633150 |
| chr15 | 91643250 | 91643350 | 1274-Lng-A-T | 137  | chr15:91643250-91643350 |
| chr15 | 91653450 | 91653550 | 1223-Lng-A-T | 109  | chr15:91653450-91653550 |
| chr15 | 91658850 | 91658950 | 1065-Lng-C-T | 96   | chr15:91658850-91658950 |
| chr15 | 91661250 | 91661350 | 1065-Lng-B-T | 444  | chr15:91661250-91661350 |
| chr15 | 91694550 | 91694650 | 1072-Lng-A-T | 48   | chr15:91694550-91694650 |
| chr15 | 91710350 | 91710450 | 1223-Lng-C-T | 82   | chr15:91710350-91710450 |

**Table S2: SB Insertion regions**

|       |          |          |              |      |                         |
|-------|----------|----------|--------------|------|-------------------------|
| chr15 | 91745550 | 91745650 | 1065-Lng-A-T | 68   | chr15:91745550-91745650 |
| chr15 | 91747850 | 91747950 | 1090-Lng-A-T | 132  | chr15:91747850-91747950 |
| chr15 | 91842050 | 91842150 | 901-Lng-A-T  | 106  | chr15:91842050-91842150 |
| chr15 | 91869950 | 91870050 | 1274-Lng-A-T | 59   | chr15:91869950-91870050 |
| chr15 | 91904050 | 91904150 | 1223-Lng-A-T | 68   | chr15:91904050-91904150 |
| chr15 | 91911850 | 91911950 | 901-Lng-D-T  | 43   | chr15:91911850-91911950 |
| chr15 | 91969150 | 91969250 | 1090-Lng-A-T | 64   | chr15:91969150-91969250 |
| chr15 | 91989950 | 91990050 | 1065-Lng-C-T | 84   | chr15:91989950-91990050 |
| chr15 | 92034850 | 92034950 | 1223-Lng-B-T | 183  | chr15:92034850-92034950 |
| chr15 | 92113350 | 92113450 | 901-Lng-A-T  | 95   | chr15:92113350-92113450 |
| chr15 | 92141550 | 92141650 | 1065-Lng-C-T | 411  | chr15:92141550-92141650 |
| chr15 | 92145450 | 92145550 | 1065-Lng-A-T | 135  | chr15:92145450-92145550 |
| chr15 | 92154450 | 92154550 | 901-Lng-C-T  | 36   | chr15:92154450-92154550 |
| chr15 | 92210550 | 92210650 | 1167-Lng-A-T | 109  | chr15:92210550-92210650 |
| chr15 | 92240750 | 92240850 | 1090-Lng-B-T | 926  | chr15:92240750-92240850 |
| chr15 | 92263450 | 92263550 | 901-Lng-D-T  | 172  | chr15:92263450-92263550 |
| chr15 | 92311150 | 92311250 | 1065-Lng-B-T | 40   | chr15:92311150-92311250 |
| chr15 | 92313850 | 92313950 | 1004-Lng-A-T | 66   | chr15:92313850-92313950 |
| chr15 | 92328050 | 92328150 | 1065-Lng-C-T | 1947 | chr15:92328050-92328150 |
| chr15 | 92368450 | 92368550 | 1072-Lng-A-T | 52   | chr15:92368450-92368550 |
| chr15 | 92375850 | 92375950 | 1072-Lng-A-T | 90   | chr15:92375850-92375950 |
| chr15 | 92378050 | 92378150 | 1065-Lng-A-T | 38   | chr15:92378050-92378150 |
| chr15 | 92388250 | 92388350 | 1072-Lng-A-T | 7221 | chr15:92388250-92388350 |
| chr15 | 92401750 | 92401850 | 901-Lng-C-T  | 50   | chr15:92401750-92401850 |
| chr15 | 92450750 | 92450850 | 846-Lng-A-T  | 49   | chr15:92450750-92450850 |
| chr15 | 92455750 | 92455850 | 1065-Lng-A-T | 36   | chr15:92455750-92455850 |
| chr15 | 92507750 | 92507850 | 1090-Lng-A-T | 78   | chr15:92507750-92507850 |
| chr15 | 92547850 | 92547950 | 1065-Lng-B-T | 39   | chr15:92547850-92547950 |
| chr15 | 92570650 | 92570750 | 1090-Lng-A-T | 70   | chr15:92570650-92570750 |
| chr15 | 92635350 | 92635450 | 1065-Lng-C-T | 79   | chr15:92635350-92635450 |
| chr15 | 92688650 | 92688750 | 1065-Lng-B-T | 47   | chr15:92688650-92688750 |
| chr15 | 92692050 | 92692150 | 1223-Lng-A-T | 243  | chr15:92692050-92692150 |
| chr15 | 92694050 | 92694150 | 1072-Lng-A-T | 176  | chr15:92694050-92694150 |
| chr15 | 92807950 | 92808050 | 1065-Lng-B-T | 66   | chr15:92807950-92808050 |
| chr15 | 92872750 | 92872850 | 1004-Lng-A-T | 80   | chr15:92872750-92872850 |
| chr15 | 92873250 | 92873350 | 1072-Lng-A-T | 61   | chr15:92873250-92873350 |
| chr15 | 92906350 | 92906450 | 901-Lng-B-T  | 346  | chr15:92906350-92906450 |
| chr15 | 93030450 | 93030550 | 901-Lng-A-T  | 50   | chr15:93030450-93030550 |
| chr15 | 93092350 | 93092450 | 1090-Lng-A-T | 104  | chr15:93092350-93092450 |
| chr15 | 93093350 | 93093450 | 901-Lng-D-T  | 43   | chr15:93093350-93093450 |
| chr15 | 93099050 | 93099150 | 1065-Lng-A-T | 81   | chr15:93099050-93099150 |
| chr15 | 93099850 | 93099950 | 1065-Lng-A-T | 937  | chr15:93099850-93099950 |
| chr15 | 93112250 | 93112350 | 1167-Lng-A-T | 45   | chr15:93112250-93112350 |
| chr15 | 93114750 | 93114850 | 1223-Lng-A-T | 285  | chr15:93114750-93114850 |
| chr15 | 93125650 | 93125750 | 1004-Lng-A-T | 180  | chr15:93125650-93125750 |
| chr15 | 93127650 | 93127750 | 1090-Lng-A-T | 46   | chr15:93127650-93127750 |

**Table S2: SB Insertion regions**

|       |          |          |              |     |                         |
|-------|----------|----------|--------------|-----|-------------------------|
| chr15 | 93151150 | 93151250 | 1223-Lng-A-T | 156 | chr15:93151150-93151250 |
| chr15 | 93156350 | 93156450 | 901-Lng-B-T  | 251 | chr15:93156350-93156450 |
| chr15 | 93214350 | 93214450 | 901-Lng-A-T  | 76  | chr15:93214350-93214450 |
| chr15 | 93237650 | 93237750 | 1065-Lng-A-T | 88  | chr15:93237650-93237750 |
| chr15 | 93259650 | 93259750 | 1065-Lng-A-T | 107 | chr15:93259650-93259750 |
| chr15 | 93263250 | 93263350 | 1004-Lng-A-T | 49  | chr15:93263250-93263350 |
| chr15 | 93269350 | 93269450 | 1065-Lng-B-T | 82  | chr15:93269350-93269450 |
| chr15 | 93270550 | 93270650 | 901-Lng-A-T  | 76  | chr15:93270550-93270650 |
| chr15 | 93328850 | 93328950 | 1223-Lng-C-T | 62  | chr15:93328850-93328950 |
| chr15 | 93330050 | 93330150 | 1004-Lng-A-T | 630 | chr15:93330050-93330150 |
| chr15 | 93330250 | 93330350 | 1065-Lng-B-T | 58  | chr15:93330250-93330350 |
| chr15 | 93344050 | 93344150 | 1090-Lng-A-T | 48  | chr15:93344050-93344150 |
| chr15 | 93443750 | 93443850 | 901-Lng-A-T  | 63  | chr15:93443750-93443850 |
| chr15 | 93465550 | 93465650 | 1065-Lng-B-T | 41  | chr15:93465550-93465650 |
| chr15 | 93517950 | 93518050 | 1065-Lng-B-T | 72  | chr15:93517950-93518050 |
| chr15 | 93526450 | 93526550 | 846-Lng-A-T  | 60  | chr15:93526450-93526550 |
| chr15 | 93613850 | 93613950 | 1090-Lng-A-T | 100 | chr15:93613850-93613950 |
| chr15 | 93650550 | 93650650 | 1072-Lng-A-T | 59  | chr15:93650550-93650650 |
| chr15 | 93705750 | 93705850 | 1065-Lng-A-T | 71  | chr15:93705750-93705850 |
| chr15 | 93744350 | 93744450 | 846-Lng-A-T  | 107 | chr15:93744350-93744450 |
| chr15 | 93770850 | 93770950 | 1004-Lng-A-T | 52  | chr15:93770850-93770950 |
| chr15 | 93839050 | 93839150 | 1223-Lng-A-T | 104 | chr15:93839050-93839150 |
| chr15 | 93853550 | 93853650 | 1065-Lng-B-T | 45  | chr15:93853550-93853650 |
| chr15 | 93855850 | 93855950 | 1065-Lng-B-T | 55  | chr15:93855850-93855950 |
| chr15 | 93858850 | 93858950 | 901-Lng-B-T  | 236 | chr15:93858850-93858950 |
| chr15 | 93897950 | 93898050 | 1072-Lng-A-T | 532 | chr15:93897950-93898050 |
| chr15 | 93931750 | 93931850 | 1072-Lng-A-T | 54  | chr15:93931750-93931850 |
| chr15 | 93940050 | 93940150 | 1065-Lng-B-T | 51  | chr15:93940050-93940150 |
| chr15 | 93991950 | 93992050 | 1072-Lng-A-T | 190 | chr15:93991950-93992050 |
| chr15 | 94007650 | 94007750 | 1065-Lng-A-T | 37  | chr15:94007650-94007750 |
| chr15 | 94009150 | 94009250 | 1065-Lng-A-T | 129 | chr15:94009150-94009250 |
| chr15 | 94040450 | 94040550 | 1065-Lng-A-T | 246 | chr15:94040450-94040550 |
| chr15 | 94123450 | 94123550 | 901-Lng-A-T  | 90  | chr15:94123450-94123550 |
| chr15 | 94178950 | 94179050 | 1065-Lng-A-T | 371 | chr15:94178950-94179050 |
| chr15 | 94193750 | 94193850 | 901-Lng-A-T  | 265 | chr15:94193750-94193850 |
| chr15 | 94214150 | 94214250 | 901-Lng-A-T  | 123 | chr15:94214150-94214250 |
| chr15 | 94245550 | 94245650 | 1065-Lng-B-T | 54  | chr15:94245550-94245650 |
| chr15 | 94273850 | 94273950 | 1065-Lng-A-T | 62  | chr15:94273850-94273950 |
| chr15 | 94375050 | 94375150 | 1065-Lng-B-T | 57  | chr15:94375050-94375150 |
| chr15 | 94389050 | 94389150 | 1072-Lng-A-T | 58  | chr15:94389050-94389150 |
| chr15 | 94403750 | 94403850 | 1072-Lng-A-T | 49  | chr15:94403750-94403850 |
| chr15 | 94416650 | 94416750 | 846-Lng-A-T  | 62  | chr15:94416650-94416750 |
| chr15 | 94421550 | 94421650 | 846-Lng-A-T  | 190 | chr15:94421550-94421650 |
| chr15 | 94458950 | 94459050 | 901-Lng-A-T  | 108 | chr15:94458950-94459050 |
| chr15 | 94459150 | 94459250 | 1167-Lng-A-T | 213 | chr15:94459150-94459250 |
| chr15 | 94461250 | 94461350 | 1167-Lng-A-T | 66  | chr15:94461250-94461350 |



**Table S2: SB Insertion regions**

|       |          |          |              |      |                         |
|-------|----------|----------|--------------|------|-------------------------|
| chr15 | 94488550 | 94488650 | 1167-Lng-A-T | 98   | chr15:94488550-94488650 |
| chr15 | 94492450 | 94492550 | 1072-Lng-A-T | 3954 | chr15:94492450-94492550 |
| chr15 | 94542950 | 94543050 | 1223-Lng-A-T | 58   | chr15:94542950-94543050 |
| chr15 | 94560650 | 94560750 | 901-Lng-D-T  | 43   | chr15:94560650-94560750 |
| chr15 | 94569050 | 94569150 | 901-Lng-A-T  | 139  | chr15:94569050-94569150 |
| chr15 | 94611550 | 94611650 | 901-Lng-A-T  | 109  | chr15:94611550-94611650 |
| chr15 | 94656450 | 94656550 | 1223-Lng-C-T | 67   | chr15:94656450-94656550 |
| chr15 | 94694150 | 94694250 | 1065-Lng-B-T | 64   | chr15:94694150-94694250 |
| chr15 | 94776850 | 94776950 | 1065-Lng-C-T | 84   | chr15:94776850-94776950 |
| chr15 | 94827550 | 94827650 | 846-Lng-A-T  | 160  | chr15:94827550-94827650 |
| chr15 | 94854550 | 94854650 | 1065-Lng-B-T | 44   | chr15:94854550-94854650 |
| chr15 | 94858950 | 94859050 | 901-Lng-B-T  | 189  | chr15:94858950-94859050 |
| chr15 | 94906950 | 94907050 | 1167-Lng-A-T | 48   | chr15:94906950-94907050 |
| chr15 | 94972950 | 94973050 | 1065-Lng-C-T | 78   | chr15:94972950-94973050 |
| chr15 | 95179750 | 95179850 | 1223-Lng-D-T | 64   | chr15:95179750-95179850 |
| chr15 | 95195250 | 95195350 | 901-Lng-C-T  | 53   | chr15:95195250-95195350 |
| chr15 | 95199050 | 95199150 | 1090-Lng-B-T | 830  | chr15:95199050-95199150 |
| chr15 | 95239850 | 95239950 | 901-Lng-B-T  | 50   | chr15:95239850-95239950 |
| chr15 | 95257050 | 95257150 | 1065-Lng-B-T | 56   | chr15:95257050-95257150 |
| chr15 | 95337250 | 95337350 | 1090-Lng-A-T | 468  | chr15:95337250-95337350 |
| chr15 | 95378650 | 95378750 | 1065-Lng-A-T | 99   | chr15:95378650-95378750 |
| chr15 | 95379550 | 95379650 | 1065-Lng-A-T | 241  | chr15:95379550-95379650 |
| chr15 | 95389250 | 95389350 | 1090-Lng-A-T | 69   | chr15:95389250-95389350 |
| chr15 | 95399150 | 95399250 | 1065-Lng-C-T | 260  | chr15:95399150-95399250 |
| chr15 | 95433350 | 95433450 | 1072-Lng-A-T | 86   | chr15:95433350-95433450 |
| chr15 | 95498150 | 95498250 | 1167-Lng-A-T | 50   | chr15:95498150-95498250 |
| chr15 | 95547750 | 95547850 | 1090-Lng-B-T | 252  | chr15:95547750-95547850 |
| chr15 | 95633650 | 95633750 | 901-Lng-C-T  | 247  | chr15:95633650-95633750 |
| chr15 | 95646450 | 95646550 | 901-Lng-D-T  | 50   | chr15:95646450-95646550 |
| chr15 | 95647650 | 95647750 | 1065-Lng-B-T | 44   | chr15:95647650-95647750 |
| chr15 | 95655350 | 95655450 | 1065-Lng-A-T | 35   | chr15:95655350-95655450 |
| chr15 | 95655650 | 95655750 | 901-Lng-A-T  | 93   | chr15:95655650-95655750 |
| chr15 | 95661250 | 95661350 | 1065-Lng-C-T | 70   | chr15:95661250-95661350 |
| chr15 | 95661950 | 95662050 | 1100-Lng-A-T | 123  | chr15:95661950-95662050 |
| chr15 | 95665950 | 95666050 | 901-Lng-B-T  | 162  | chr15:95665950-95666050 |
| chr15 | 95677850 | 95677950 | 1090-Lng-A-T | 56   | chr15:95677850-95677950 |
| chr15 | 95691550 | 95691650 | 1223-Lng-C-T | 69   | chr15:95691550-95691650 |
| chr15 | 95697650 | 95697750 | 1004-Lng-A-T | 53   | chr15:95697650-95697750 |
| chr15 | 95719350 | 95719450 | 1152-Lng-A-T | 42   | chr15:95719350-95719450 |
| chr15 | 95719350 | 95719450 | 1065-Lng-B-T | 49   | chr15:95719350-95719450 |
| chr15 | 95719450 | 95719550 | 1223-Lng-A-T | 96   | chr15:95719450-95719550 |
| chr15 | 95730750 | 95730850 | 901-Lng-A-T  | 54   | chr15:95730750-95730850 |
| chr15 | 95740450 | 95740550 | 1223-Lng-B-T | 66   | chr15:95740450-95740550 |
| chr15 | 95745150 | 95745250 | 901-Lng-C-T  | 48   | chr15:95745150-95745250 |
| chr15 | 95760650 | 95760750 | 901-Lng-A-T  | 80   | chr15:95760650-95760750 |
| chr15 | 95762150 | 95762250 | 1065-Lng-B-T | 139  | chr15:95762150-95762250 |

**Table S2: SB Insertion regions**

|       |          |          |              |      |                         |
|-------|----------|----------|--------------|------|-------------------------|
| chr15 | 95765550 | 95765650 | 846-Lng-A-T  | 122  | chr15:95765550-95765650 |
| chr15 | 95785550 | 95785650 | 1065-Lng-B-T | 51   | chr15:95785550-95785650 |
| chr15 | 95975250 | 95975350 | 1072-Lng-A-T | 68   | chr15:95975250-95975350 |
| chr15 | 96035750 | 96035850 | 1065-Lng-B-T | 74   | chr15:96035750-96035850 |
| chr15 | 96046750 | 96046850 | 1223-Lng-B-T | 37   | chr15:96046750-96046850 |
| chr15 | 96062450 | 96062550 | 1090-Lng-A-T | 87   | chr15:96062450-96062550 |
| chr15 | 96101250 | 96101350 | 1065-Lng-A-T | 90   | chr15:96101250-96101350 |
| chr15 | 96102950 | 96103050 | 901-Lng-C-T  | 32   | chr15:96102950-96103050 |
| chr15 | 96131550 | 96131650 | 1167-Lng-A-T | 1029 | chr15:96131550-96131650 |
| chr15 | 96131950 | 96132050 | 1223-Lng-A-T | 178  | chr15:96131950-96132050 |
| chr15 | 96151850 | 96151950 | 1167-Lng-A-T | 59   | chr15:96151850-96151950 |
| chr15 | 96161150 | 96161250 | 901-Lng-A-T  | 295  | chr15:96161150-96161250 |
| chr15 | 96178250 | 96178350 | 1167-Lng-A-T | 78   | chr15:96178250-96178350 |
| chr15 | 96198950 | 96199050 | 1072-Lng-A-T | 73   | chr15:96198950-96199050 |
| chr15 | 96206650 | 96206750 | 1090-Lng-A-T | 1336 | chr15:96206650-96206750 |
| chr15 | 96217550 | 96217650 | 1100-Lng-A-T | 270  | chr15:96217550-96217650 |
| chr15 | 96218550 | 96218650 | 846-Lng-A-T  | 53   | chr15:96218550-96218650 |
| chr15 | 96229650 | 96229750 | 901-Lng-A-T  | 54   | chr15:96229650-96229750 |
| chr15 | 96235250 | 96235350 | 1151-Lng-A-T | 417  | chr15:96235250-96235350 |
| chr15 | 96237450 | 96237550 | 1090-Lng-A-T | 47   | chr15:96237450-96237550 |
| chr15 | 96270750 | 96270850 | 1223-Lng-B-T | 116  | chr15:96270750-96270850 |
| chr15 | 96271550 | 96271650 | 1223-Lng-D-T | 409  | chr15:96271550-96271650 |
| chr15 | 96271950 | 96272050 | 901-Lng-A-T  | 109  | chr15:96271950-96272050 |
| chr15 | 96274850 | 96274950 | 1274-Lng-A-T | 151  | chr15:96274850-96274950 |
| chr15 | 96275750 | 96275850 | 1065-Lng-A-T | 42   | chr15:96275750-96275850 |
| chr15 | 96278250 | 96278350 | 1065-Lng-B-T | 90   | chr15:96278250-96278350 |
| chr15 | 96284450 | 96284550 | 901-Lng-A-T  | 55   | chr15:96284450-96284550 |
| chr15 | 96284450 | 96284550 | 901-Lng-B-T  | 104  | chr15:96284450-96284550 |
| chr15 | 96286250 | 96286350 | 901-Lng-C-T  | 258  | chr15:96286250-96286350 |
| chr15 | 96287750 | 96287850 | 901-Lng-A-T  | 128  | chr15:96287750-96287850 |
| chr15 | 96310950 | 96311050 | 1072-Lng-A-T | 123  | chr15:96310950-96311050 |
| chr15 | 96359050 | 96359150 | 1090-Lng-A-T | 95   | chr15:96359050-96359150 |
| chr15 | 96423050 | 96423150 | 1090-Lng-A-T | 46   | chr15:96423050-96423150 |
| chr15 | 96431050 | 96431150 | 1223-Lng-D-T | 47   | chr15:96431050-96431150 |
| chr15 | 96442050 | 96442150 | 1223-Lng-C-T | 55   | chr15:96442050-96442150 |
| chr15 | 96458550 | 96458650 | 1223-Lng-B-T | 148  | chr15:96458550-96458650 |
| chr15 | 96496550 | 96496650 | 1065-Lng-A-T | 45   | chr15:96496550-96496650 |
| chr15 | 96525450 | 96525550 | 1274-Lng-A-T | 50   | chr15:96525450-96525550 |
| chr15 | 96590250 | 96590350 | 846-Lng-A-T  | 88   | chr15:96590250-96590350 |
| chr15 | 96594950 | 96595050 | 1065-Lng-A-T | 66   | chr15:96594950-96595050 |
| chr15 | 96663850 | 96663950 | 1223-Lng-C-T | 68   | chr15:96663850-96663950 |
| chr15 | 96911050 | 96911150 | 1065-Lng-B-T | 54   | chr15:96911050-96911150 |
| chr15 | 97009350 | 97009450 | 1090-Lng-A-T | 59   | chr15:97009350-97009450 |
| chr15 | 97031950 | 97032050 | 901-Lng-A-T  | 447  | chr15:97031950-97032050 |
| chr15 | 97057450 | 97057550 | 1065-Lng-B-T | 52   | chr15:97057450-97057550 |
| chr15 | 97080850 | 97080950 | 1072-Lng-A-T | 112  | chr15:97080850-97080950 |

**Table S2: SB Insertion regions**

|       |          |          |              |     |                         |
|-------|----------|----------|--------------|-----|-------------------------|
| chr15 | 97127350 | 97127450 | 1004-Lng-A-T | 57  | chr15:97127350-97127450 |
| chr15 | 97377350 | 97377450 | 1152-Lng-A-T | 273 | chr15:97377350-97377450 |
| chr15 | 97401650 | 97401750 | 1072-Lng-A-T | 196 | chr15:97401650-97401750 |
| chr15 | 97573450 | 97573550 | 901-Lng-D-T  | 466 | chr15:97573450-97573550 |
| chr15 | 97573450 | 97573550 | 1167-Lng-A-T | 77  | chr15:97573450-97573550 |
| chr15 | 97590750 | 97590850 | 1065-Lng-C-T | 96  | chr15:97590750-97590850 |
| chr15 | 97606950 | 97607050 | 1223-Lng-D-T | 190 | chr15:97606950-97607050 |
| chr15 | 97693250 | 97693350 | 1072-Lng-A-T | 52  | chr15:97693250-97693350 |
| chr15 | 97705250 | 97705350 | 1223-Lng-C-T | 69  | chr15:97705250-97705350 |
| chr15 | 97874850 | 97874950 | 901-Lng-C-T  | 111 | chr15:97874850-97874950 |
| chr15 | 97908150 | 97908250 | 901-Lng-D-T  | 105 | chr15:97908150-97908250 |
| chr15 | 97916150 | 97916250 | 1065-Lng-C-T | 787 | chr15:97916150-97916250 |
| chr15 | 97922050 | 97922150 | 1223-Lng-A-T | 108 | chr15:97922050-97922150 |
| chr15 | 97927250 | 97927350 | 1090-Lng-A-T | 103 | chr15:97927250-97927350 |
| chr15 | 97961350 | 97961450 | 1152-Lng-A-T | 135 | chr15:97961350-97961450 |
| chr15 | 97963950 | 97964050 | 1065-Lng-C-T | 366 | chr15:97963950-97964050 |
| chr15 | 97970750 | 97970850 | 901-Lng-A-T  | 94  | chr15:97970750-97970850 |
| chr15 | 97984350 | 97984450 | 1167-Lng-A-T | 370 | chr15:97984350-97984450 |
| chr15 | 98042350 | 98042450 | 901-Lng-A-T  | 86  | chr15:98042350-98042450 |
| chr15 | 98081750 | 98081850 | 1072-Lng-A-T | 142 | chr15:98081750-98081850 |
| chr15 | 98118450 | 98118550 | 846-Lng-A-T  | 143 | chr15:98118450-98118550 |
| chr15 | 98139650 | 98139750 | 1065-Lng-B-T | 80  | chr15:98139650-98139750 |
| chr15 | 98357350 | 98357450 | 1188-Lng-A-T | 84  | chr15:98357350-98357450 |
| chr15 | 98364950 | 98365050 | 1223-Lng-C-T | 211 | chr15:98364950-98365050 |
| chr15 | 98371150 | 98371250 | 1151-Lng-A-T | 322 | chr15:98371150-98371250 |
| chr15 | 98444150 | 98444250 | 1072-Lng-A-T | 170 | chr15:98444150-98444250 |
| chr15 | 98492650 | 98492750 | 1223-Lng-B-T | 61  | chr15:98492650-98492750 |
| chr15 | 98513050 | 98513150 | 901-Lng-A-T  | 51  | chr15:98513050-98513150 |
| chr15 | 98557950 | 98558050 | 1167-Lng-A-T | 50  | chr15:98557950-98558050 |
| chr15 | 98572250 | 98572350 | 1223-Lng-C-T | 135 | chr15:98572250-98572350 |
| chr15 | 98583050 | 98583150 | 901-Lng-C-T  | 193 | chr15:98583050-98583150 |
| chr15 | 98643150 | 98643250 | 901-Lng-A-T  | 90  | chr15:98643150-98643250 |
| chr15 | 98761050 | 98761150 | 1100-Lng-B-T | 391 | chr15:98761050-98761150 |
| chr15 | 98810950 | 98811050 | 1223-Lng-B-T | 80  | chr15:98810950-98811050 |
| chr15 | 98856850 | 98856950 | 1223-Lng-B-T | 43  | chr15:98856850-98856950 |
| chr15 | 99013050 | 99013150 | 901-Lng-C-T  | 33  | chr15:99013050-99013150 |
| chr15 | 99150350 | 99150450 | 901-Lng-B-T  | 603 | chr15:99150350-99150450 |
| chr15 | 99316950 | 99317050 | 1065-Lng-A-T | 73  | chr15:99316950-99317050 |
| chr15 | 99561450 | 99561550 | 901-Lng-A-T  | 125 | chr15:99561450-99561550 |
| chr15 | 99629550 | 99629650 | 1090-Lng-A-T | 88  | chr15:99629550-99629650 |
| chr15 | 99688150 | 99688250 | 1152-Lng-A-T | 56  | chr15:99688150-99688250 |
| chr15 | 99691350 | 99691450 | 901-Lng-D-T  | 345 | chr15:99691350-99691450 |
| chr15 | 99819150 | 99819250 | 1100-Lng-A-T | 160 | chr15:99819150-99819250 |
| chr15 | 99835150 | 99835250 | 1167-Lng-A-T | 71  | chr15:99835150-99835250 |
| chr15 | 99881850 | 99881950 | 1223-Lng-B-T | 35  | chr15:99881850-99881950 |
| chr15 | 99915650 | 99915750 | 1223-Lng-B-T | 57  | chr15:99915650-99915750 |

**Table S2: SB Insertion regions**

|       |           |           |              |     |                           |
|-------|-----------|-----------|--------------|-----|---------------------------|
| chr15 | 99941450  | 99941550  | 1065-Lng-B-T | 44  | chr15:99941450-99941550   |
| chr15 | 99952250  | 99952350  | 1090-Lng-B-T | 459 | chr15:99952250-99952350   |
| chr15 | 99960850  | 99960950  | 901-Lng-A-T  | 104 | chr15:99960850-99960950   |
| chr15 | 100030550 | 100030650 | 1090-Lng-A-T | 63  | chr15:100030550-100030650 |
| chr15 | 100069750 | 100069850 | 1151-Lng-A-T | 379 | chr15:100069750-100069850 |
| chr15 | 100153050 | 100153150 | 901-Lng-A-T  | 71  | chr15:100153050-100153150 |
| chr15 | 100168350 | 100168450 | 1065-Lng-B-T | 144 | chr15:100168350-100168450 |
| chr15 | 100214850 | 100214950 | 1072-Lng-A-T | 156 | chr15:100214850-100214950 |
| chr15 | 100225350 | 100225450 | 1004-Lng-A-T | 80  | chr15:100225350-100225450 |
| chr15 | 100247550 | 100247650 | 1152-Lng-A-T | 433 | chr15:100247550-100247650 |
| chr15 | 100248950 | 100249050 | 901-Lng-B-T  | 155 | chr15:100248950-100249050 |
| chr15 | 100249550 | 100249650 | 1004-Lng-A-T | 69  | chr15:100249550-100249650 |
| chr15 | 100379450 | 100379550 | 1167-Lng-A-T | 168 | chr15:100379450-100379550 |
| chr15 | 100545950 | 100546050 | 901-Lng-C-T  | 114 | chr15:100545950-100546050 |
| chr15 | 100586750 | 100586850 | 901-Lng-A-T  | 102 | chr15:100586750-100586850 |
| chr15 | 100656250 | 100656350 | 1065-Lng-A-T | 57  | chr15:100656250-100656350 |
| chr15 | 101006250 | 101006350 | 1223-Lng-C-T | 271 | chr15:101006250-101006350 |
| chr15 | 101006750 | 101006850 | 1223-Lng-B-T | 179 | chr15:101006750-101006850 |
| chr15 | 101009550 | 101009650 | 1223-Lng-A-T | 53  | chr15:101009550-101009650 |
| chr15 | 101028750 | 101028850 | 901-Lng-B-T  | 291 | chr15:101028750-101028850 |
| chr15 | 101036050 | 101036150 | 1223-Lng-C-T | 520 | chr15:101036050-101036150 |
| chr15 | 101070750 | 101070850 | 1223-Lng-A-T | 72  | chr15:101070750-101070850 |
| chr15 | 101075750 | 101075850 | 1100-Lng-A-T | 117 | chr15:101075750-101075850 |
| chr15 | 101118150 | 101118250 | 1072-Lng-A-T | 157 | chr15:101118150-101118250 |
| chr15 | 101133350 | 101133450 | 1004-Lng-A-T | 64  | chr15:101133350-101133450 |
| chr15 | 101178050 | 101178150 | 901-Lng-A-T  | 62  | chr15:101178050-101178150 |
| chr15 | 101226750 | 101226850 | 1065-Lng-A-T | 68  | chr15:101226750-101226850 |
| chr15 | 101231150 | 101231250 | 1152-Lng-A-T | 52  | chr15:101231150-101231250 |
| chr15 | 101593050 | 101593150 | 901-Lng-C-T  | 74  | chr15:101593050-101593150 |
| chr15 | 101652950 | 101653050 | 1065-Lng-A-T | 76  | chr15:101652950-101653050 |
| chr15 | 101724950 | 101725050 | 1065-Lng-A-T | 58  | chr15:101724950-101725050 |
| chr15 | 101767150 | 101767250 | 1151-Lng-A-T | 344 | chr15:101767150-101767250 |
| chr15 | 101917450 | 101917550 | 1223-Lng-B-T | 48  | chr15:101917450-101917550 |
| chr15 | 101918850 | 101918950 | 1100-Lng-A-T | 63  | chr15:101918850-101918950 |
| chr15 | 102030150 | 102030250 | 1065-Lng-B-T | 60  | chr15:102030150-102030250 |
| chr15 | 102227850 | 102227950 | 1167-Lng-A-T | 455 | chr15:102227850-102227950 |
| chr15 | 102253050 | 102253150 | 1223-Lng-C-T | 63  | chr15:102253050-102253150 |
| chr15 | 102260750 | 102260850 | 901-Lng-B-T  | 117 | chr15:102260750-102260850 |
| chr15 | 102264950 | 102265050 | 1065-Lng-A-T | 194 | chr15:102264950-102265050 |
| chr15 | 102266850 | 102266950 | 1090-Lng-A-T | 86  | chr15:102266850-102266950 |
| chr15 | 102312350 | 102312450 | 1223-Lng-C-T | 47  | chr15:102312350-102312450 |
| chr15 | 102332650 | 102332750 | 1223-Lng-B-T | 144 | chr15:102332650-102332750 |
| chr15 | 102335250 | 102335350 | 846-Lng-A-T  | 342 | chr15:102335250-102335350 |
| chr15 | 102357450 | 102357550 | 1072-Lng-A-T | 113 | chr15:102357450-102357550 |
| chr15 | 102404650 | 102404750 | 1065-Lng-B-T | 437 | chr15:102404650-102404750 |
| chr15 | 102408150 | 102408250 | 1152-Lng-A-T | 193 | chr15:102408150-102408250 |

**Table S2: SB Insertion regions**

|       |           |           |              |     |                           |
|-------|-----------|-----------|--------------|-----|---------------------------|
| chr15 | 102421150 | 102421250 | 1065-Lng-A-T | 222 | chr15:102421150-102421250 |
| chr15 | 102425150 | 102425250 | 1152-Lng-A-T | 235 | chr15:102425150-102425250 |
| chr15 | 102437850 | 102437950 | 1072-Lng-A-T | 55  | chr15:102437850-102437950 |
| chr15 | 102445850 | 102445950 | 1188-Lng-A-T | 124 | chr15:102445850-102445950 |
| chr15 | 102448850 | 102448950 | 1188-Lng-A-T | 49  | chr15:102448850-102448950 |
| chr15 | 102452550 | 102452650 | 901-Lng-A-T  | 67  | chr15:102452550-102452650 |
| chr15 | 102457150 | 102457250 | 1167-Lng-A-T | 70  | chr15:102457150-102457250 |
| chr15 | 102486950 | 102487050 | 1151-Lng-A-T | 327 | chr15:102486950-102487050 |
| chr15 | 102492550 | 102492650 | 1274-Lng-A-T | 66  | chr15:102492550-102492650 |
| chr15 | 102493950 | 102494050 | 901-Lng-D-T  | 37  | chr15:102493950-102494050 |
| chr15 | 102590250 | 102590350 | 1223-Lng-A-T | 96  | chr15:102590250-102590350 |
| chr15 | 102656450 | 102656550 | 1065-Lng-A-T | 40  | chr15:102656450-102656550 |
| chr15 | 102698750 | 102698850 | 901-Lng-A-T  | 69  | chr15:102698750-102698850 |
| chr15 | 102888250 | 102888350 | 1072-Lng-A-T | 51  | chr15:102888250-102888350 |
| chr15 | 103063150 | 103063250 | 1274-Lng-A-T | 63  | chr15:103063150-103063250 |
| chr15 | 103064150 | 103064250 | 1065-Lng-B-T | 68  | chr15:103064150-103064250 |
| chr15 | 103066350 | 103066450 | 1223-Lng-D-T | 42  | chr15:103066350-103066450 |
| chr15 | 103097850 | 103097950 | 1223-Lng-C-T | 72  | chr15:103097850-103097950 |
| chr15 | 103103850 | 103103950 | 1100-Lng-A-T | 62  | chr15:103103850-103103950 |
| chr15 | 103114350 | 103114450 | 901-Lng-C-T  | 58  | chr15:103114350-103114450 |
| chr15 | 103235150 | 103235250 | 1223-Lng-B-T | 43  | chr15:103235150-103235250 |
| chr15 | 103290850 | 103290950 | 901-Lng-C-T  | 66  | chr15:103290850-103290950 |
| chr15 | 103298850 | 103298950 | 901-Lng-B-T  | 267 | chr15:103298850-103298950 |
| chr15 | 103307450 | 103307550 | 1223-Lng-B-T | 34  | chr15:103307450-103307550 |
| chr15 | 103307850 | 103307950 | 1065-Lng-B-T | 74  | chr15:103307850-103307950 |
| chr15 | 103309650 | 103309750 | 1090-Lng-A-T | 66  | chr15:103309650-103309750 |
| chr15 | 103339350 | 103339450 | 1223-Lng-B-T | 39  | chr15:103339350-103339450 |
| chr15 | 103342350 | 103342450 | 901-Lng-C-T  | 59  | chr15:103342350-103342450 |
| chr15 | 103342650 | 103342750 | 1090-Lng-A-T | 91  | chr15:103342650-103342750 |
| chr15 | 103345950 | 103346050 | 1090-Lng-A-T | 110 | chr15:103345950-103346050 |
| chr16 | 3246750   | 3246850   | 901-Lng-C-T  | 98  | chr16:3246750-3246850     |
| chr16 | 3247950   | 3248050   | 1004-Lng-A-T | 106 | chr16:3247950-3248050     |
| chr16 | 3256350   | 3256450   | 1152-Lng-A-T | 170 | chr16:3256350-3256450     |
| chr16 | 3885750   | 3885850   | 1065-Lng-C-T | 82  | chr16:3885750-3885850     |
| chr16 | 3907350   | 3907450   | 1167-Lng-A-T | 68  | chr16:3907350-3907450     |
| chr16 | 4051850   | 4051950   | 1065-Lng-A-T | 67  | chr16:4051850-4051950     |
| chr16 | 4125850   | 4125950   | 1151-Lng-A-T | 171 | chr16:4125850-4125950     |
| chr16 | 4131050   | 4131150   | 1152-Lng-A-T | 81  | chr16:4131050-4131150     |
| chr16 | 4143550   | 4143650   | 1223-Lng-B-T | 215 | chr16:4143550-4143650     |
| chr16 | 4150150   | 4150250   | 1100-Lng-A-T | 108 | chr16:4150150-4150250     |
| chr16 | 4177150   | 4177250   | 1223-Lng-D-T | 57  | chr16:4177150-4177250     |
| chr16 | 4177450   | 4177550   | 1223-Lng-A-T | 164 | chr16:4177450-4177550     |
| chr16 | 4180750   | 4180850   | 1223-Lng-D-T | 41  | chr16:4180750-4180850     |
| chr16 | 4180850   | 4180950   | 1100-Lng-A-T | 140 | chr16:4180850-4180950     |
| chr16 | 4181350   | 4181450   | 1274-Lng-A-T | 136 | chr16:4181350-4181450     |
| chr16 | 4206650   | 4206750   | 1274-Lng-A-T | 139 | chr16:4206650-4206750     |

**Table S2: SB Insertion regions**

|       |         |         |              |      |                       |
|-------|---------|---------|--------------|------|-----------------------|
| chr16 | 4315950 | 4316050 | 901-Lng-D-T  | 331  | chr16:4315950-4316050 |
| chr16 | 4321350 | 4321450 | 1223-Lng-A-T | 1117 | chr16:4321350-4321450 |
| chr16 | 4373650 | 4373750 | 846-Lng-A-T  | 59   | chr16:4373650-4373750 |
| chr16 | 4374950 | 4375050 | 1151-Lng-A-T | 63   | chr16:4374950-4375050 |
| chr16 | 4376150 | 4376250 | 1151-Lng-A-T | 260  | chr16:4376150-4376250 |
| chr16 | 4385150 | 4385250 | 1274-Lng-A-T | 88   | chr16:4385150-4385250 |
| chr16 | 4402350 | 4402450 | 1004-Lng-A-T | 77   | chr16:4402350-4402450 |
| chr16 | 4478750 | 4478850 | 1274-Lng-A-T | 58   | chr16:4478750-4478850 |
| chr16 | 4480950 | 4481050 | 1188-Lng-A-T | 83   | chr16:4480950-4481050 |
| chr16 | 4487950 | 4488050 | 1065-Lng-C-T | 61   | chr16:4487950-4488050 |
| chr16 | 4555550 | 4555650 | 1065-Lng-C-T | 77   | chr16:4555550-4555650 |
| chr16 | 4740150 | 4740250 | 1100-Lng-A-T | 108  | chr16:4740150-4740250 |
| chr16 | 4764450 | 4764550 | 1100-Lng-A-T | 55   | chr16:4764450-4764550 |
| chr16 | 4788250 | 4788350 | 901-Lng-B-T  | 67   | chr16:4788250-4788350 |
| chr16 | 4839350 | 4839450 | 1274-Lng-A-T | 130  | chr16:4839350-4839450 |
| chr16 | 4876350 | 4876450 | 901-Lng-B-T  | 83   | chr16:4876350-4876450 |
| chr16 | 4890550 | 4890650 | 1188-Lng-A-T | 75   | chr16:4890550-4890650 |
| chr16 | 4934750 | 4934850 | 1100-Lng-A-T | 86   | chr16:4934750-4934850 |
| chr16 | 5026450 | 5026550 | 1100-Lng-A-T | 82   | chr16:5026450-5026550 |
| chr16 | 5028350 | 5028450 | 1223-Lng-D-T | 436  | chr16:5028350-5028450 |
| chr16 | 5045150 | 5045250 | 1223-Lng-C-T | 313  | chr16:5045150-5045250 |
| chr16 | 5154650 | 5154750 | 1100-Lng-A-T | 71   | chr16:5154650-5154750 |
| chr16 | 5155050 | 5155150 | 1065-Lng-C-T | 69   | chr16:5155050-5155150 |
| chr16 | 6001950 | 6002050 | 1065-Lng-A-T | 43   | chr16:6001950-6002050 |
| chr16 | 6211150 | 6211250 | 901-Lng-C-T  | 39   | chr16:6211150-6211250 |
| chr16 | 6478950 | 6479050 | 1065-Lng-B-T | 161  | chr16:6478950-6479050 |
| chr16 | 6639150 | 6639250 | 1072-Lng-A-T | 52   | chr16:6639150-6639250 |
| chr16 | 6723650 | 6723750 | 901-Lng-A-T  | 78   | chr16:6723650-6723750 |
| chr16 | 6943650 | 6943750 | 1065-Lng-B-T | 65   | chr16:6943650-6943750 |
| chr16 | 7033550 | 7033650 | 1065-Lng-A-T | 49   | chr16:7033550-7033650 |
| chr16 | 7101750 | 7101850 | 1065-Lng-C-T | 62   | chr16:7101750-7101850 |
| chr16 | 7208650 | 7208750 | 1004-Lng-A-T | 111  | chr16:7208650-7208750 |
| chr16 | 7438550 | 7438650 | 1151-Lng-A-T | 254  | chr16:7438550-7438650 |
| chr16 | 7679950 | 7680050 | 901-Lng-A-T  | 76   | chr16:7679950-7680050 |
| chr16 | 7922850 | 7922950 | 901-Lng-B-T  | 89   | chr16:7922850-7922950 |
| chr16 | 8169650 | 8169750 | 1065-Lng-C-T | 61   | chr16:8169650-8169750 |
| chr16 | 8194250 | 8194350 | 1223-Lng-D-T | 40   | chr16:8194250-8194350 |
| chr16 | 8203450 | 8203550 | 1004-Lng-A-T | 74   | chr16:8203450-8203550 |
| chr16 | 8318850 | 8318950 | 846-Lng-A-T  | 68   | chr16:8318850-8318950 |
| chr16 | 8332150 | 8332250 | 1065-Lng-B-T | 64   | chr16:8332150-8332250 |
| chr16 | 8359950 | 8360050 | 1151-Lng-A-T | 77   | chr16:8359950-8360050 |
| chr16 | 8679650 | 8679750 | 1274-Lng-A-T | 87   | chr16:8679650-8679750 |
| chr16 | 8700950 | 8701050 | 1065-Lng-B-T | 88   | chr16:8700950-8701050 |
| chr16 | 8701950 | 8702050 | 901-Lng-B-T  | 137  | chr16:8701950-8702050 |
| chr16 | 8753650 | 8753750 | 1072-Lng-A-T | 72   | chr16:8753650-8753750 |
| chr16 | 8923050 | 8923150 | 1100-Lng-A-T | 62   | chr16:8923050-8923150 |

**Table S2: SB Insertion regions**

|       |          |          |              |     |                         |
|-------|----------|----------|--------------|-----|-------------------------|
| chr16 | 9029850  | 9029950  | 1223-Lng-A-T | 102 | chr16:9029850-9029950   |
| chr16 | 9050450  | 9050550  | 1065-Lng-B-T | 69  | chr16:9050450-9050550   |
| chr16 | 9554450  | 9554550  | 1274-Lng-A-T | 59  | chr16:9554450-9554550   |
| chr16 | 9570950  | 9571050  | 901-Lng-D-T  | 449 | chr16:9570950-9571050   |
| chr16 | 9571650  | 9571750  | 1223-Lng-A-T | 103 | chr16:9571650-9571750   |
| chr16 | 9613450  | 9613550  | 901-Lng-B-T  | 209 | chr16:9613450-9613550   |
| chr16 | 10315350 | 10315450 | 1090-Lng-A-T | 70  | chr16:10315350-10315450 |
| chr16 | 10347350 | 10347450 | 1100-Lng-A-T | 51  | chr16:10347350-10347450 |
| chr16 | 10388850 | 10388950 | 1274-Lng-A-T | 59  | chr16:10388850-10388950 |
| chr16 | 10423650 | 10423750 | 1274-Lng-A-T | 245 | chr16:10423650-10423750 |
| chr16 | 10466050 | 10466150 | 1151-Lng-A-T | 68  | chr16:10466050-10466150 |
| chr16 | 10495050 | 10495150 | 901-Lng-A-T  | 499 | chr16:10495050-10495150 |
| chr16 | 10505250 | 10505350 | 1065-Lng-C-T | 67  | chr16:10505250-10505350 |
| chr16 | 10533950 | 10534050 | 1152-Lng-A-T | 168 | chr16:10533950-10534050 |
| chr16 | 10628850 | 10628950 | 1223-Lng-B-T | 255 | chr16:10628850-10628950 |
| chr16 | 10637550 | 10637650 | 1274-Lng-A-T | 57  | chr16:10637550-10637650 |
| chr16 | 10659150 | 10659250 | 1065-Lng-B-T | 58  | chr16:10659150-10659250 |
| chr16 | 10689250 | 10689350 | 901-Lng-C-T  | 52  | chr16:10689250-10689350 |
| chr16 | 10691050 | 10691150 | 1274-Lng-A-T | 108 | chr16:10691050-10691150 |
| chr16 | 10848850 | 10848950 | 901-Lng-A-T  | 105 | chr16:10848850-10848950 |
| chr16 | 10930350 | 10930450 | 901-Lng-B-T  | 50  | chr16:10930350-10930450 |
| chr16 | 11071650 | 11071750 | 1072-Lng-A-T | 161 | chr16:11071650-11071750 |
| chr16 | 11080550 | 11080650 | 1065-Lng-A-T | 94  | chr16:11080550-11080650 |
| chr16 | 11097950 | 11098050 | 1223-Lng-D-T | 855 | chr16:11097950-11098050 |
| chr16 | 11154350 | 11154450 | 1223-Lng-C-T | 45  | chr16:11154350-11154450 |
| chr16 | 11157950 | 11158050 | 1100-Lng-B-T | 68  | chr16:11157950-11158050 |
| chr16 | 11159450 | 11159550 | 901-Lng-A-T  | 60  | chr16:11159450-11159550 |
| chr16 | 11217450 | 11217550 | 1188-Lng-A-T | 144 | chr16:11217450-11217550 |
| chr16 | 11227050 | 11227150 | 1274-Lng-A-T | 59  | chr16:11227050-11227150 |
| chr16 | 11234650 | 11234750 | 1151-Lng-A-T | 90  | chr16:11234650-11234750 |
| chr16 | 11429750 | 11429850 | 901-Lng-B-T  | 133 | chr16:11429750-11429850 |
| chr16 | 11470350 | 11470450 | 846-Lng-A-T  | 117 | chr16:11470350-11470450 |
| chr16 | 11565050 | 11565150 | 1274-Lng-A-T | 56  | chr16:11565050-11565150 |
| chr16 | 11625750 | 11625850 | 1100-Lng-A-T | 55  | chr16:11625750-11625850 |
| chr16 | 11675250 | 11675350 | 1065-Lng-B-T | 74  | chr16:11675250-11675350 |
| chr16 | 11675250 | 11675350 | 1188-Lng-A-T | 36  | chr16:11675250-11675350 |
| chr16 | 11827650 | 11827750 | 1167-Lng-A-T | 46  | chr16:11827650-11827750 |
| chr16 | 11838450 | 11838550 | 901-Lng-C-T  | 54  | chr16:11838450-11838550 |
| chr16 | 11859350 | 11859450 | 1090-Lng-B-T | 875 | chr16:11859350-11859450 |
| chr16 | 12085350 | 12085450 | 846-Lng-A-T  | 45  | chr16:12085350-12085450 |
| chr16 | 12095550 | 12095650 | 1223-Lng-D-T | 932 | chr16:12095550-12095650 |
| chr16 | 12225050 | 12225150 | 1100-Lng-A-T | 119 | chr16:12225050-12225150 |
| chr16 | 12616150 | 12616250 | 1223-Lng-A-T | 156 | chr16:12616150-12616250 |
| chr16 | 12729350 | 12729450 | 1065-Lng-B-T | 92  | chr16:12729350-12729450 |
| chr16 | 12729650 | 12729750 | 1188-Lng-A-T | 47  | chr16:12729650-12729750 |
| chr16 | 12836250 | 12836350 | 1065-Lng-B-T | 47  | chr16:12836250-12836350 |

**Table S2: SB Insertion regions**

|       |          |          |              |      |                         |
|-------|----------|----------|--------------|------|-------------------------|
| chr16 | 12895950 | 12896050 | 1274-Lng-A-T | 170  | chr16:12895950-12896050 |
| chr16 | 13027050 | 13027150 | 1065-Lng-A-T | 56   | chr16:13027050-13027150 |
| chr16 | 13111950 | 13112050 | 901-Lng-A-T  | 55   | chr16:13111950-13112050 |
| chr16 | 13236950 | 13237050 | 1065-Lng-A-T | 143  | chr16:13236950-13237050 |
| chr16 | 13311150 | 13311250 | 1100-Lng-A-T | 58   | chr16:13311150-13311250 |
| chr16 | 13342750 | 13342850 | 1151-Lng-A-T | 54   | chr16:13342750-13342850 |
| chr16 | 13372150 | 13372250 | 901-Lng-A-T  | 119  | chr16:13372150-13372250 |
| chr16 | 13399250 | 13399350 | 1223-Lng-A-T | 87   | chr16:13399250-13399350 |
| chr16 | 13404150 | 13404250 | 1188-Lng-A-T | 142  | chr16:13404150-13404250 |
| chr16 | 13561050 | 13561150 | 1151-Lng-A-T | 64   | chr16:13561050-13561150 |
| chr16 | 13638350 | 13638450 | 1065-Lng-A-T | 42   | chr16:13638350-13638450 |
| chr16 | 13653850 | 13653950 | 1065-Lng-C-T | 1496 | chr16:13653850-13653950 |
| chr16 | 13840750 | 13840850 | 1151-Lng-A-T | 484  | chr16:13840750-13840850 |
| chr16 | 13873950 | 13874050 | 901-Lng-C-T  | 205  | chr16:13873950-13874050 |
| chr16 | 13990650 | 13990750 | 1223-Lng-C-T | 62   | chr16:13990650-13990750 |
| chr16 | 14149350 | 14149450 | 1223-Lng-C-T | 46   | chr16:14149350-14149450 |
| chr16 | 14259750 | 14259850 | 1065-Lng-A-T | 47   | chr16:14259750-14259850 |
| chr16 | 14301450 | 14301550 | 1188-Lng-A-T | 64   | chr16:14301450-14301550 |
| chr16 | 14625650 | 14625750 | 1072-Lng-A-T | 303  | chr16:14625650-14625750 |
| chr16 | 15156950 | 15157050 | 1152-Lng-A-T | 166  | chr16:15156950-15157050 |
| chr16 | 15190350 | 15190450 | 1223-Lng-A-T | 101  | chr16:15190350-15190450 |
| chr16 | 15433650 | 15433750 | 901-Lng-A-T  | 147  | chr16:15433650-15433750 |
| chr16 | 15553150 | 15553250 | 1151-Lng-A-T | 55   | chr16:15553150-15553250 |
| chr16 | 15560850 | 15560950 | 1152-Lng-A-T | 64   | chr16:15560850-15560950 |
| chr16 | 15572550 | 15572650 | 1167-Lng-A-T | 133  | chr16:15572550-15572650 |
| chr16 | 15655650 | 15655750 | 901-Lng-A-T  | 90   | chr16:15655650-15655750 |
| chr16 | 15954250 | 15954350 | 901-Lng-A-T  | 83   | chr16:15954250-15954350 |
| chr16 | 16067750 | 16067850 | 1152-Lng-A-T | 77   | chr16:16067750-16067850 |
| chr16 | 16229550 | 16229650 | 846-Lng-A-T  | 229  | chr16:16229550-16229650 |
| chr16 | 16271250 | 16271350 | 1100-Lng-A-T | 143  | chr16:16271250-16271350 |
| chr16 | 16273750 | 16273850 | 1223-Lng-B-T | 37   | chr16:16273750-16273850 |
| chr16 | 16274950 | 16275050 | 901-Lng-C-T  | 75   | chr16:16274950-16275050 |
| chr16 | 16354550 | 16354650 | 1004-Lng-A-T | 74   | chr16:16354550-16354650 |
| chr16 | 16356450 | 16356550 | 1090-Lng-B-T | 155  | chr16:16356450-16356550 |
| chr16 | 16519250 | 16519350 | 1100-Lng-A-T | 127  | chr16:16519250-16519350 |
| chr16 | 16536650 | 16536750 | 1151-Lng-A-T | 221  | chr16:16536650-16536750 |
| chr16 | 16571850 | 16571950 | 1065-Lng-B-T | 214  | chr16:16571850-16571950 |
| chr16 | 16588550 | 16588650 | 1090-Lng-A-T | 555  | chr16:16588550-16588650 |
| chr16 | 16792950 | 16793050 | 1188-Lng-A-T | 152  | chr16:16792950-16793050 |
| chr16 | 16873450 | 16873550 | 1223-Lng-C-T | 45   | chr16:16873450-16873550 |
| chr16 | 16985250 | 16985350 | 1223-Lng-A-T | 109  | chr16:16985250-16985350 |
| chr16 | 17035250 | 17035350 | 1065-Lng-C-T | 118  | chr16:17035250-17035350 |
| chr16 | 17085350 | 17085450 | 1167-Lng-A-T | 1479 | chr16:17085350-17085450 |
| chr16 | 17095850 | 17095950 | 1065-Lng-C-T | 76   | chr16:17095850-17095950 |
| chr16 | 17157950 | 17158050 | 1072-Lng-A-T | 191  | chr16:17157950-17158050 |
| chr16 | 17181650 | 17181750 | 1188-Lng-A-T | 38   | chr16:17181650-17181750 |



**Table S2: SB Insertion regions**

|       |          |          |              |       |                         |
|-------|----------|----------|--------------|-------|-------------------------|
| chr16 | 17196350 | 17196450 | 1004-Lng-A-T | 56    | chr16:17196350-17196450 |
| chr16 | 17287450 | 17287550 | 1151-Lng-A-T | 73    | chr16:17287450-17287550 |
| chr16 | 17325250 | 17325350 | 1188-Lng-A-T | 37    | chr16:17325250-17325350 |
| chr16 | 17433650 | 17433750 | 1152-Lng-A-T | 59    | chr16:17433650-17433750 |
| chr16 | 17712550 | 17712650 | 1065-Lng-A-T | 47    | chr16:17712550-17712650 |
| chr16 | 17721450 | 17721550 | 1065-Lng-C-T | 100   | chr16:17721450-17721550 |
| chr16 | 17771450 | 17771550 | 901-Lng-A-T  | 134   | chr16:17771450-17771550 |
| chr16 | 17823050 | 17823150 | 1151-Lng-A-T | 59    | chr16:17823050-17823150 |
| chr16 | 17852250 | 17852350 | 901-Lng-C-T  | 125   | chr16:17852250-17852350 |
| chr16 | 17864850 | 17864950 | 1152-Lng-A-T | 292   | chr16:17864850-17864950 |
| chr16 | 17882750 | 17882850 | 901-Lng-B-T  | 163   | chr16:17882750-17882850 |
| chr16 | 17887350 | 17887450 | 1167-Lng-A-T | 61    | chr16:17887350-17887450 |
| chr16 | 17888750 | 17888850 | 1274-Lng-A-T | 50    | chr16:17888750-17888850 |
| chr16 | 18253850 | 18253950 | 1065-Lng-C-T | 95    | chr16:18253850-18253950 |
| chr16 | 18349250 | 18349350 | 1065-Lng-A-T | 45    | chr16:18349250-18349350 |
| chr16 | 18394350 | 18394450 | 1167-Lng-A-T | 89    | chr16:18394350-18394450 |
| chr16 | 18742550 | 18742650 | 1151-Lng-A-T | 70    | chr16:18742550-18742650 |
| chr16 | 18929450 | 18929550 | 846-Lng-A-T  | 119   | chr16:18929450-18929550 |
| chr16 | 19088350 | 19088450 | 1274-Lng-A-T | 49    | chr16:19088350-19088450 |
| chr16 | 19531050 | 19531150 | 1188-Lng-A-T | 238   | chr16:19531050-19531150 |
| chr16 | 19626650 | 19626750 | 1090-Lng-A-T | 74    | chr16:19626650-19626750 |
| chr16 | 19664250 | 19664350 | 1167-Lng-A-T | 80    | chr16:19664250-19664350 |
| chr16 | 19759450 | 19759550 | 1188-Lng-A-T | 35    | chr16:19759450-19759550 |
| chr16 | 20101250 | 20101350 | 901-Lng-B-T  | 84    | chr16:20101250-20101350 |
| chr16 | 20111050 | 20111150 | 1274-Lng-A-T | 68    | chr16:20111050-20111150 |
| chr16 | 20135450 | 20135550 | 1100-Lng-A-T | 65    | chr16:20135450-20135550 |
| chr16 | 20144350 | 20144450 | 1100-Lng-B-T | 27404 | chr16:20144350-20144450 |
| chr16 | 20150350 | 20150450 | 1274-Lng-A-T | 71    | chr16:20150350-20150450 |
| chr16 | 20411350 | 20411450 | 1151-Lng-A-T | 54    | chr16:20411350-20411450 |
| chr16 | 20481350 | 20481450 | 1090-Lng-A-T | 60    | chr16:20481350-20481450 |
| chr16 | 20518750 | 20518850 | 1167-Lng-A-T | 88    | chr16:20518750-20518850 |
| chr16 | 20772650 | 20772750 | 1065-Lng-B-T | 69    | chr16:20772650-20772750 |
| chr16 | 20841250 | 20841350 | 901-Lng-A-T  | 113   | chr16:20841250-20841350 |
| chr16 | 21224750 | 21224850 | 901-Lng-C-T  | 38    | chr16:21224750-21224850 |
| chr16 | 21641250 | 21641350 | 901-Lng-C-T  | 66    | chr16:21641250-21641350 |
| chr16 | 21792750 | 21792850 | 1223-Lng-B-T | 35    | chr16:21792750-21792850 |
| chr16 | 21856950 | 21857050 | 901-Lng-A-T  | 310   | chr16:21856950-21857050 |
| chr16 | 21875750 | 21875850 | 1223-Lng-D-T | 43    | chr16:21875750-21875850 |
| chr16 | 21934350 | 21934450 | 1188-Lng-A-T | 52    | chr16:21934350-21934450 |
| chr16 | 21957450 | 21957550 | 1188-Lng-A-T | 145   | chr16:21957450-21957550 |
| chr16 | 22004550 | 22004650 | 1100-Lng-A-T | 59    | chr16:22004550-22004650 |
| chr16 | 22011250 | 22011350 | 1151-Lng-A-T | 58    | chr16:22011250-22011350 |
| chr16 | 22030750 | 22030850 | 1090-Lng-A-T | 318   | chr16:22030750-22030850 |
| chr16 | 22177850 | 22177950 | 1274-Lng-A-T | 64    | chr16:22177850-22177950 |
| chr16 | 22243350 | 22243450 | 1152-Lng-A-T | 155   | chr16:22243350-22243450 |
| chr16 | 22257850 | 22257950 | 1274-Lng-A-T | 191   | chr16:22257850-22257950 |

**Table S2: SB Insertion regions**

|       |          |          |              |     |                         |
|-------|----------|----------|--------------|-----|-------------------------|
| chr16 | 22388550 | 22388650 | 901-Lng-A-T  | 54  | chr16:22388550-22388650 |
| chr16 | 22398050 | 22398150 | 1274-Lng-A-T | 262 | chr16:22398050-22398150 |
| chr16 | 22407050 | 22407150 | 1100-Lng-A-T | 178 | chr16:22407050-22407150 |
| chr16 | 22412950 | 22413050 | 1065-Lng-B-T | 55  | chr16:22412950-22413050 |
| chr16 | 22415450 | 22415550 | 1065-Lng-A-T | 84  | chr16:22415450-22415550 |
| chr16 | 22695350 | 22695450 | 901-Lng-D-T  | 73  | chr16:22695350-22695450 |
| chr16 | 22847950 | 22848050 | 1065-Lng-B-T | 65  | chr16:22847950-22848050 |
| chr16 | 22958250 | 22958350 | 1100-Lng-A-T | 134 | chr16:22958250-22958350 |
| chr16 | 23068950 | 23069050 | 1072-Lng-A-T | 78  | chr16:23068950-23069050 |
| chr16 | 23130850 | 23130950 | 1072-Lng-A-T | 148 | chr16:23130850-23130950 |
| chr16 | 23324850 | 23324950 | 901-Lng-B-T  | 188 | chr16:23324850-23324950 |
| chr16 | 23327150 | 23327250 | 1065-Lng-B-T | 58  | chr16:23327150-23327250 |
| chr16 | 23411850 | 23411950 | 1100-Lng-B-T | 199 | chr16:23411850-23411950 |
| chr16 | 23441250 | 23441350 | 1065-Lng-B-T | 58  | chr16:23441250-23441350 |
| chr16 | 23843050 | 23843150 | 1072-Lng-A-T | 123 | chr16:23843050-23843150 |
| chr16 | 23967650 | 23967750 | 1151-Lng-A-T | 203 | chr16:23967650-23967750 |
| chr16 | 24127050 | 24127150 | 846-Lng-A-T  | 190 | chr16:24127050-24127150 |
| chr16 | 24130550 | 24130650 | 901-Lng-B-T  | 74  | chr16:24130550-24130650 |
| chr16 | 24285750 | 24285850 | 1090-Lng-A-T | 82  | chr16:24285750-24285850 |
| chr16 | 24333450 | 24333550 | 1167-Lng-A-T | 56  | chr16:24333450-24333550 |
| chr16 | 24351150 | 24351250 | 1100-Lng-B-T | 187 | chr16:24351150-24351250 |
| chr16 | 24380750 | 24380850 | 1072-Lng-A-T | 66  | chr16:24380750-24380850 |
| chr16 | 24388950 | 24389050 | 1004-Lng-A-T | 61  | chr16:24388950-24389050 |
| chr16 | 24435250 | 24435350 | 1100-Lng-A-T | 82  | chr16:24435250-24435350 |
| chr16 | 24440650 | 24440750 | 901-Lng-C-T  | 30  | chr16:24440650-24440750 |
| chr16 | 24450350 | 24450450 | 901-Lng-A-T  | 75  | chr16:24450350-24450450 |
| chr16 | 24469350 | 24469450 | 1090-Lng-A-T | 45  | chr16:24469350-24469450 |
| chr16 | 24515850 | 24515950 | 846-Lng-A-T  | 101 | chr16:24515850-24515950 |
| chr16 | 24543250 | 24543350 | 1167-Lng-A-T | 55  | chr16:24543250-24543350 |
| chr16 | 24651450 | 24651550 | 1090-Lng-B-T | 93  | chr16:24651450-24651550 |
| chr16 | 24680050 | 24680150 | 1223-Lng-D-T | 84  | chr16:24680050-24680150 |
| chr16 | 24733250 | 24733350 | 1100-Lng-A-T | 91  | chr16:24733250-24733350 |
| chr16 | 24756350 | 24756450 | 1151-Lng-A-T | 480 | chr16:24756350-24756450 |
| chr16 | 24800050 | 24800150 | 1151-Lng-A-T | 164 | chr16:24800050-24800150 |
| chr16 | 24801450 | 24801550 | 1274-Lng-A-T | 138 | chr16:24801450-24801550 |
| chr16 | 24801550 | 24801650 | 1100-Lng-A-T | 118 | chr16:24801550-24801650 |
| chr16 | 24805750 | 24805850 | 1274-Lng-A-T | 88  | chr16:24805750-24805850 |
| chr16 | 24845550 | 24845650 | 1065-Lng-B-T | 82  | chr16:24845550-24845650 |
| chr16 | 24883950 | 24884050 | 1090-Lng-A-T | 70  | chr16:24883950-24884050 |
| chr16 | 24922450 | 24922550 | 1223-Lng-C-T | 44  | chr16:24922450-24922550 |
| chr16 | 24941050 | 24941150 | 1065-Lng-C-T | 63  | chr16:24941050-24941150 |
| chr16 | 24960050 | 24960150 | 1065-Lng-A-T | 434 | chr16:24960050-24960150 |
| chr16 | 25292150 | 25292250 | 901-Lng-C-T  | 72  | chr16:25292150-25292250 |
| chr16 | 25391450 | 25391550 | 1072-Lng-A-T | 103 | chr16:25391450-25391550 |
| chr16 | 25466050 | 25466150 | 1090-Lng-A-T | 50  | chr16:25466050-25466150 |
| chr16 | 25721350 | 25721450 | 901-Lng-A-T  | 114 | chr16:25721350-25721450 |

**Table S2: SB Insertion regions**

|       |          |          |              |      |                         |
|-------|----------|----------|--------------|------|-------------------------|
| chr16 | 26103650 | 26103750 | 901-Lng-C-T  | 60   | chr16:26103650-26103750 |
| chr16 | 26356950 | 26357050 | 901-Lng-C-T  | 83   | chr16:26356950-26357050 |
| chr16 | 26460950 | 26461050 | 1090-Lng-A-T | 131  | chr16:26460950-26461050 |
| chr16 | 26573750 | 26573850 | 1223-Lng-A-T | 64   | chr16:26573750-26573850 |
| chr16 | 26610550 | 26610650 | 901-Lng-B-T  | 36   | chr16:26610550-26610650 |
| chr16 | 26669250 | 26669350 | 1274-Lng-A-T | 180  | chr16:26669250-26669350 |
| chr16 | 26737450 | 26737550 | 1100-Lng-A-T | 65   | chr16:26737450-26737550 |
| chr16 | 26824850 | 26824950 | 1274-Lng-A-T | 57   | chr16:26824850-26824950 |
| chr16 | 26881350 | 26881450 | 1065-Lng-B-T | 85   | chr16:26881350-26881450 |
| chr16 | 26987150 | 26987250 | 1223-Lng-B-T | 515  | chr16:26987150-26987250 |
| chr16 | 27010750 | 27010850 | 1004-Lng-A-T | 83   | chr16:27010750-27010850 |
| chr16 | 27179650 | 27179750 | 1274-Lng-A-T | 77   | chr16:27179650-27179750 |
| chr16 | 27243650 | 27243750 | 1223-Lng-B-T | 55   | chr16:27243650-27243750 |
| chr16 | 27394350 | 27394450 | 1065-Lng-B-T | 53   | chr16:27394350-27394450 |
| chr16 | 27404850 | 27404950 | 1065-Lng-C-T | 91   | chr16:27404850-27404950 |
| chr16 | 27843050 | 27843150 | 901-Lng-D-T  | 163  | chr16:27843050-27843150 |
| chr16 | 27974450 | 27974550 | 1065-Lng-B-T | 59   | chr16:27974450-27974550 |
| chr16 | 28156350 | 28156450 | 1223-Lng-B-T | 43   | chr16:28156350-28156450 |
| chr16 | 28367250 | 28367350 | 1065-Lng-C-T | 100  | chr16:28367250-28367350 |
| chr16 | 28404550 | 28404650 | 846-Lng-A-T  | 287  | chr16:28404550-28404650 |
| chr16 | 28743150 | 28743250 | 1151-Lng-A-T | 115  | chr16:28743150-28743250 |
| chr16 | 28759350 | 28759450 | 1167-Lng-A-T | 77   | chr16:28759350-28759450 |
| chr16 | 28897250 | 28897350 | 1223-Lng-A-T | 68   | chr16:28897250-28897350 |
| chr16 | 29139450 | 29139550 | 901-Lng-C-T  | 37   | chr16:29139450-29139550 |
| chr16 | 29190350 | 29190450 | 1065-Lng-C-T | 70   | chr16:29190350-29190450 |
| chr16 | 29463250 | 29463350 | 1100-Lng-A-T | 87   | chr16:29463250-29463350 |
| chr16 | 29468950 | 29469050 | 1004-Lng-A-T | 59   | chr16:29468950-29469050 |
| chr16 | 29473450 | 29473550 | 1151-Lng-A-T | 274  | chr16:29473450-29473550 |
| chr16 | 29596250 | 29596350 | 1151-Lng-A-T | 68   | chr16:29596250-29596350 |
| chr16 | 29622650 | 29622750 | 1151-Lng-A-T | 79   | chr16:29622650-29622750 |
| chr16 | 29650550 | 29650650 | 1004-Lng-A-T | 109  | chr16:29650550-29650650 |
| chr16 | 29831350 | 29831450 | 1188-Lng-A-T | 187  | chr16:29831350-29831450 |
| chr16 | 29872450 | 29872550 | 901-Lng-B-T  | 198  | chr16:29872450-29872550 |
| chr16 | 29898750 | 29898850 | 1100-Lng-A-T | 75   | chr16:29898750-29898850 |
| chr16 | 29943050 | 29943150 | 1004-Lng-A-T | 57   | chr16:29943050-29943150 |
| chr16 | 30127050 | 30127150 | 1274-Lng-A-T | 57   | chr16:30127050-30127150 |
| chr16 | 30326950 | 30327050 | 1274-Lng-A-T | 122  | chr16:30326950-30327050 |
| chr16 | 30332850 | 30332950 | 901-Lng-C-T  | 81   | chr16:30332850-30332950 |
| chr16 | 30334150 | 30334250 | 901-Lng-C-T  | 64   | chr16:30334150-30334250 |
| chr16 | 30339150 | 30339250 | 1223-Lng-B-T | 37   | chr16:30339150-30339250 |
| chr16 | 30362850 | 30362950 | 846-Lng-A-T  | 131  | chr16:30362850-30362950 |
| chr16 | 30368050 | 30368150 | 1152-Lng-A-T | 85   | chr16:30368050-30368150 |
| chr16 | 30378050 | 30378150 | 1151-Lng-A-T | 144  | chr16:30378050-30378150 |
| chr16 | 30387650 | 30387750 | 1223-Lng-C-T | 56   | chr16:30387650-30387750 |
| chr16 | 30416950 | 30417050 | 1065-Lng-C-T | 1820 | chr16:30416950-30417050 |
| chr16 | 30436150 | 30436250 | 901-Lng-A-T  | 602  | chr16:30436150-30436250 |

**Table S2: SB Insertion regions**

|       |          |          |              |      |                         |
|-------|----------|----------|--------------|------|-------------------------|
| chr16 | 30565450 | 30565550 | 1151-Lng-A-T | 179  | chr16:30565450-30565550 |
| chr16 | 30944850 | 30944950 | 1274-Lng-A-T | 98   | chr16:30944850-30944950 |
| chr16 | 30953050 | 30953150 | 1223-Lng-A-T | 164  | chr16:30953050-30953150 |
| chr16 | 30995450 | 30995550 | 901-Lng-B-T  | 145  | chr16:30995450-30995550 |
| chr16 | 31077950 | 31078050 | 1090-Lng-B-T | 725  | chr16:31077950-31078050 |
| chr16 | 31117750 | 31117850 | 1274-Lng-A-T | 71   | chr16:31117750-31117850 |
| chr16 | 31166350 | 31166450 | 1100-Lng-A-T | 89   | chr16:31166350-31166450 |
| chr16 | 31672750 | 31672850 | 1152-Lng-A-T | 113  | chr16:31672750-31672850 |
| chr16 | 31687850 | 31687950 | 1100-Lng-A-T | 81   | chr16:31687850-31687950 |
| chr16 | 31759350 | 31759450 | 901-Lng-B-T  | 125  | chr16:31759350-31759450 |
| chr16 | 31779150 | 31779250 | 1004-Lng-A-T | 385  | chr16:31779150-31779250 |
| chr16 | 31799250 | 31799350 | 1004-Lng-A-T | 136  | chr16:31799250-31799350 |
| chr16 | 31827350 | 31827450 | 1100-Lng-A-T | 117  | chr16:31827350-31827450 |
| chr16 | 32027850 | 32027950 | 901-Lng-B-T  | 84   | chr16:32027850-32027950 |
| chr16 | 32034050 | 32034150 | 1065-Lng-A-T | 123  | chr16:32034050-32034150 |
| chr16 | 32107550 | 32107650 | 1065-Lng-B-T | 234  | chr16:32107550-32107650 |
| chr16 | 32203050 | 32203150 | 1065-Lng-B-T | 45   | chr16:32203050-32203150 |
| chr16 | 32372950 | 32373050 | 1223-Lng-B-T | 67   | chr16:32372950-32373050 |
| chr16 | 32389050 | 32389150 | 1167-Lng-A-T | 303  | chr16:32389050-32389150 |
| chr16 | 32440650 | 32440750 | 1274-Lng-A-T | 203  | chr16:32440650-32440750 |
| chr16 | 32479550 | 32479650 | 1065-Lng-C-T | 289  | chr16:32479550-32479650 |
| chr16 | 32480350 | 32480450 | 1004-Lng-A-T | 50   | chr16:32480350-32480450 |
| chr16 | 32645450 | 32645550 | 1100-Lng-A-T | 102  | chr16:32645450-32645550 |
| chr16 | 32735850 | 32735950 | 1065-Lng-C-T | 4132 | chr16:32735850-32735950 |
| chr16 | 32823450 | 32823550 | 901-Lng-B-T  | 232  | chr16:32823450-32823550 |
| chr16 | 32880450 | 32880550 | 1152-Lng-A-T | 100  | chr16:32880450-32880550 |
| chr16 | 32893950 | 32894050 | 846-Lng-A-T  | 107  | chr16:32893950-32894050 |
| chr16 | 32915550 | 32915650 | 1223-Lng-A-T | 571  | chr16:32915550-32915650 |
| chr16 | 32967650 | 32967750 | 1223-Lng-B-T | 142  | chr16:32967650-32967750 |
| chr16 | 33193950 | 33194050 | 1167-Lng-A-T | 288  | chr16:33193950-33194050 |
| chr16 | 33230850 | 33230950 | 1072-Lng-A-T | 84   | chr16:33230850-33230950 |
| chr16 | 33299650 | 33299750 | 901-Lng-B-T  | 120  | chr16:33299650-33299750 |
| chr16 | 33415850 | 33415950 | 1167-Lng-A-T | 118  | chr16:33415850-33415950 |
| chr16 | 33432350 | 33432450 | 1167-Lng-A-T | 47   | chr16:33432350-33432450 |
| chr16 | 33439850 | 33439950 | 1223-Lng-A-T | 68   | chr16:33439850-33439950 |
| chr16 | 33446350 | 33446450 | 901-Lng-A-T  | 709  | chr16:33446350-33446450 |
| chr16 | 33450150 | 33450250 | 1274-Lng-A-T | 187  | chr16:33450150-33450250 |
| chr16 | 33450350 | 33450450 | 1223-Lng-B-T | 119  | chr16:33450350-33450450 |
| chr16 | 33470150 | 33470250 | 1151-Lng-A-T | 1465 | chr16:33470150-33470250 |
| chr16 | 33485950 | 33486050 | 1065-Lng-B-T | 56   | chr16:33485950-33486050 |
| chr16 | 33527950 | 33528050 | 1223-Lng-B-T | 90   | chr16:33527950-33528050 |
| chr16 | 34611750 | 34611850 | 1065-Lng-A-T | 71   | chr16:34611750-34611850 |
| chr16 | 34695850 | 34695950 | 1065-Lng-B-T | 71   | chr16:34695850-34695950 |
| chr16 | 34741750 | 34741850 | 901-Lng-A-T  | 61   | chr16:34741750-34741850 |
| chr16 | 34858350 | 34858450 | 1065-Lng-B-T | 59   | chr16:34858350-34858450 |
| chr16 | 35359150 | 35359250 | 1167-Lng-A-T | 635  | chr16:35359150-35359250 |

**Table S2: SB Insertion regions**

|       |          |          |              |      |                         |
|-------|----------|----------|--------------|------|-------------------------|
| chr16 | 35569950 | 35570050 | 1274-Lng-A-T | 240  | chr16:35569950-35570050 |
| chr16 | 35781550 | 35781650 | 1090-Lng-A-T | 701  | chr16:35781550-35781650 |
| chr16 | 35791050 | 35791150 | 1090-Lng-B-T | 701  | chr16:35791050-35791150 |
| chr16 | 35945250 | 35945350 | 1151-Lng-A-T | 212  | chr16:35945250-35945350 |
| chr16 | 35985350 | 35985450 | 901-Lng-B-T  | 125  | chr16:35985350-35985450 |
| chr16 | 35986750 | 35986850 | 1004-Lng-A-T | 676  | chr16:35986750-35986850 |
| chr16 | 36008150 | 36008250 | 1004-Lng-A-T | 62   | chr16:36008150-36008250 |
| chr16 | 36013350 | 36013450 | 1100-Lng-A-T | 55   | chr16:36013350-36013450 |
| chr16 | 36017650 | 36017750 | 901-Lng-C-T  | 33   | chr16:36017650-36017750 |
| chr16 | 36293950 | 36294050 | 1004-Lng-A-T | 60   | chr16:36293950-36294050 |
| chr16 | 36306550 | 36306650 | 1223-Lng-A-T | 234  | chr16:36306550-36306650 |
| chr16 | 36380850 | 36380950 | 1152-Lng-A-T | 410  | chr16:36380850-36380950 |
| chr16 | 36544050 | 36544150 | 1072-Lng-A-T | 55   | chr16:36544050-36544150 |
| chr16 | 36738250 | 36738350 | 1065-Lng-A-T | 128  | chr16:36738250-36738350 |
| chr16 | 36884350 | 36884450 | 1090-Lng-A-T | 46   | chr16:36884350-36884450 |
| chr16 | 36935250 | 36935350 | 1090-Lng-A-T | 627  | chr16:36935250-36935350 |
| chr16 | 37080050 | 37080150 | 846-Lng-A-T  | 117  | chr16:37080050-37080150 |
| chr16 | 37158350 | 37158450 | 901-Lng-A-T  | 107  | chr16:37158350-37158450 |
| chr16 | 37523250 | 37523350 | 1065-Lng-C-T | 1868 | chr16:37523250-37523350 |
| chr16 | 37546150 | 37546250 | 1065-Lng-B-T | 45   | chr16:37546150-37546250 |
| chr16 | 37552850 | 37552950 | 1065-Lng-A-T | 70   | chr16:37552850-37552950 |
| chr16 | 37556950 | 37557050 | 1223-Lng-A-T | 56   | chr16:37556950-37557050 |
| chr16 | 37692450 | 37692550 | 901-Lng-C-T  | 74   | chr16:37692450-37692550 |
| chr16 | 37759250 | 37759350 | 1004-Lng-A-T | 358  | chr16:37759250-37759350 |
| chr16 | 37832550 | 37832650 | 1223-Lng-C-T | 50   | chr16:37832550-37832650 |
| chr16 | 37890750 | 37890850 | 1004-Lng-A-T | 98   | chr16:37890750-37890850 |
| chr16 | 37975550 | 37975650 | 1188-Lng-A-T | 47   | chr16:37975550-37975650 |
| chr16 | 38106350 | 38106450 | 1223-Lng-A-T | 112  | chr16:38106350-38106450 |
| chr16 | 38115550 | 38115650 | 1151-Lng-A-T | 60   | chr16:38115550-38115650 |
| chr16 | 38141850 | 38141950 | 1065-Lng-A-T | 116  | chr16:38141850-38141950 |
| chr16 | 38150150 | 38150250 | 1152-Lng-A-T | 48   | chr16:38150150-38150250 |
| chr16 | 38197450 | 38197550 | 901-Lng-C-T  | 29   | chr16:38197450-38197550 |
| chr16 | 38209050 | 38209150 | 1223-Lng-D-T | 49   | chr16:38209050-38209150 |
| chr16 | 38213850 | 38213950 | 901-Lng-B-T  | 204  | chr16:38213850-38213950 |
| chr16 | 38218350 | 38218450 | 1004-Lng-A-T | 108  | chr16:38218350-38218450 |
| chr16 | 38218450 | 38218550 | 1090-Lng-A-T | 83   | chr16:38218450-38218550 |
| chr16 | 38225350 | 38225450 | 1004-Lng-A-T | 89   | chr16:38225350-38225450 |
| chr16 | 38235150 | 38235250 | 1223-Lng-B-T | 126  | chr16:38235150-38235250 |
| chr16 | 38293250 | 38293350 | 1072-Lng-A-T | 72   | chr16:38293250-38293350 |
| chr16 | 38519550 | 38519650 | 1090-Lng-B-T | 477  | chr16:38519550-38519650 |
| chr16 | 38524350 | 38524450 | 1223-Lng-A-T | 216  | chr16:38524350-38524450 |
| chr16 | 38538750 | 38538850 | 1072-Lng-A-T | 63   | chr16:38538750-38538850 |
| chr16 | 38565850 | 38565950 | 1223-Lng-B-T | 64   | chr16:38565850-38565950 |
| chr16 | 38570450 | 38570550 | 901-Lng-B-T  | 162  | chr16:38570450-38570550 |
| chr16 | 38574250 | 38574350 | 901-Lng-C-T  | 220  | chr16:38574250-38574350 |
| chr16 | 38583450 | 38583550 | 1223-Lng-B-T | 35   | chr16:38583450-38583550 |

**Table S2: SB Insertion regions**

|       |          |          |              |     |                         |
|-------|----------|----------|--------------|-----|-------------------------|
| chr16 | 38589550 | 38589650 | 1167-Lng-A-T | 406 | chr16:38589550-38589650 |
| chr16 | 38631450 | 38631550 | 1274-Lng-A-T | 55  | chr16:38631450-38631550 |
| chr16 | 38696650 | 38696750 | 1151-Lng-A-T | 178 | chr16:38696650-38696750 |
| chr16 | 39034950 | 39035050 | 1004-Lng-A-T | 97  | chr16:39034950-39035050 |
| chr16 | 39074950 | 39075050 | 1004-Lng-A-T | 105 | chr16:39074950-39075050 |
| chr16 | 39187550 | 39187650 | 1065-Lng-C-T | 63  | chr16:39187550-39187650 |
| chr16 | 39350150 | 39350250 | 901-Lng-D-T  | 172 | chr16:39350150-39350250 |
| chr16 | 39408350 | 39408450 | 901-Lng-D-T  | 198 | chr16:39408350-39408450 |
| chr16 | 39589950 | 39590050 | 1188-Lng-A-T | 45  | chr16:39589950-39590050 |
| chr16 | 39971250 | 39971350 | 1223-Lng-B-T | 48  | chr16:39971250-39971350 |
| chr16 | 40076650 | 40076750 | 1223-Lng-A-T | 312 | chr16:40076650-40076750 |
| chr16 | 40107450 | 40107550 | 1065-Lng-B-T | 65  | chr16:40107450-40107550 |
| chr16 | 40142550 | 40142650 | 901-Lng-D-T  | 174 | chr16:40142550-40142650 |
| chr16 | 40394650 | 40394750 | 1004-Lng-A-T | 64  | chr16:40394650-40394750 |
| chr16 | 40535450 | 40535550 | 846-Lng-A-T  | 92  | chr16:40535450-40535550 |
| chr16 | 40536650 | 40536750 | 1065-Lng-B-T | 53  | chr16:40536650-40536750 |
| chr16 | 40707250 | 40707350 | 1090-Lng-A-T | 642 | chr16:40707250-40707350 |
| chr16 | 40757050 | 40757150 | 1167-Lng-A-T | 53  | chr16:40757050-40757150 |
| chr16 | 40802850 | 40802950 | 901-Lng-B-T  | 179 | chr16:40802850-40802950 |
| chr16 | 41115450 | 41115550 | 846-Lng-A-T  | 53  | chr16:41115450-41115550 |
| chr16 | 41225350 | 41225450 | 901-Lng-D-T  | 170 | chr16:41225350-41225450 |
| chr16 | 41288050 | 41288150 | 1090-Lng-A-T | 94  | chr16:41288050-41288150 |
| chr16 | 41624850 | 41624950 | 901-Lng-C-T  | 39  | chr16:41624850-41624950 |
| chr16 | 41681950 | 41682050 | 1223-Lng-C-T | 62  | chr16:41681950-41682050 |
| chr16 | 41777450 | 41777550 | 901-Lng-C-T  | 71  | chr16:41777450-41777550 |
| chr16 | 41886050 | 41886150 | 1004-Lng-A-T | 501 | chr16:41886050-41886150 |
| chr16 | 41943150 | 41943250 | 901-Lng-A-T  | 66  | chr16:41943150-41943250 |
| chr16 | 42078450 | 42078550 | 901-Lng-A-T  | 80  | chr16:42078450-42078550 |
| chr16 | 42158050 | 42158150 | 1223-Lng-A-T | 63  | chr16:42158050-42158150 |
| chr16 | 42474650 | 42474750 | 901-Lng-C-T  | 65  | chr16:42474650-42474750 |
| chr16 | 42522350 | 42522450 | 1152-Lng-A-T | 46  | chr16:42522350-42522450 |
| chr16 | 42756950 | 42757050 | 1065-Lng-C-T | 97  | chr16:42756950-42757050 |
| chr16 | 42827850 | 42827950 | 901-Lng-C-T  | 62  | chr16:42827850-42827950 |
| chr16 | 42948350 | 42948450 | 846-Lng-A-T  | 87  | chr16:42948350-42948450 |
| chr16 | 43023250 | 43023350 | 1223-Lng-C-T | 47  | chr16:43023250-43023350 |
| chr16 | 43060650 | 43060750 | 901-Lng-A-T  | 447 | chr16:43060650-43060750 |
| chr16 | 43084750 | 43084850 | 1090-Lng-A-T | 100 | chr16:43084750-43084850 |
| chr16 | 43103750 | 43103850 | 846-Lng-A-T  | 78  | chr16:43103750-43103850 |
| chr16 | 43130750 | 43130850 | 1152-Lng-A-T | 36  | chr16:43130750-43130850 |
| chr16 | 43145550 | 43145650 | 901-Lng-B-T  | 112 | chr16:43145550-43145650 |
| chr16 | 43163650 | 43163750 | 1167-Lng-A-T | 50  | chr16:43163650-43163750 |
| chr16 | 43179650 | 43179750 | 846-Lng-A-T  | 142 | chr16:43179650-43179750 |
| chr16 | 43240950 | 43241050 | 1090-Lng-A-T | 48  | chr16:43240950-43241050 |
| chr16 | 43254250 | 43254350 | 846-Lng-A-T  | 106 | chr16:43254250-43254350 |
| chr16 | 43260650 | 43260750 | 1065-Lng-C-T | 70  | chr16:43260650-43260750 |
| chr16 | 43286750 | 43286850 | 1223-Lng-B-T | 48  | chr16:43286750-43286850 |

**Table S2: SB Insertion regions**

|       |          |          |              |       |                         |
|-------|----------|----------|--------------|-------|-------------------------|
| chr16 | 43306850 | 43306950 | 1223-Lng-C-T | 46    | chr16:43306850-43306950 |
| chr16 | 43321750 | 43321850 | 1274-Lng-A-T | 189   | chr16:43321750-43321850 |
| chr16 | 43343850 | 43343950 | 1090-Lng-A-T | 66    | chr16:43343850-43343950 |
| chr16 | 43356550 | 43356650 | 1065-Lng-B-T | 69    | chr16:43356550-43356650 |
| chr16 | 43389050 | 43389150 | 1152-Lng-A-T | 99    | chr16:43389050-43389150 |
| chr16 | 43443150 | 43443250 | 1223-Lng-A-T | 51    | chr16:43443150-43443250 |
| chr16 | 43480650 | 43480750 | 1004-Lng-A-T | 50    | chr16:43480650-43480750 |
| chr16 | 43480950 | 43481050 | 1090-Lng-A-T | 55    | chr16:43480950-43481050 |
| chr16 | 43543050 | 43543150 | 1100-Lng-A-T | 114   | chr16:43543050-43543150 |
| chr16 | 43544750 | 43544850 | 901-Lng-B-T  | 91    | chr16:43544750-43544850 |
| chr16 | 43557050 | 43557150 | 1152-Lng-A-T | 64    | chr16:43557050-43557150 |
| chr16 | 43589150 | 43589250 | 1223-Lng-C-T | 45    | chr16:43589150-43589250 |
| chr16 | 43592250 | 43592350 | 901-Lng-A-T  | 58    | chr16:43592250-43592350 |
| chr16 | 43630750 | 43630850 | 1223-Lng-D-T | 91    | chr16:43630750-43630850 |
| chr16 | 43643150 | 43643250 | 901-Lng-C-T  | 34    | chr16:43643150-43643250 |
| chr16 | 43809750 | 43809850 | 1223-Lng-B-T | 288   | chr16:43809750-43809850 |
| chr16 | 44077050 | 44077150 | 1152-Lng-A-T | 58    | chr16:44077050-44077150 |
| chr16 | 44095250 | 44095350 | 1004-Lng-A-T | 76    | chr16:44095250-44095350 |
| chr16 | 44112450 | 44112550 | 1004-Lng-A-T | 168   | chr16:44112450-44112550 |
| chr16 | 44120750 | 44120850 | 901-Lng-C-T  | 34    | chr16:44120750-44120850 |
| chr16 | 44133650 | 44133750 | 1004-Lng-A-T | 55    | chr16:44133650-44133750 |
| chr16 | 44134550 | 44134650 | 1090-Lng-A-T | 78    | chr16:44134550-44134650 |
| chr16 | 44187350 | 44187450 | 901-Lng-B-T  | 131   | chr16:44187350-44187450 |
| chr16 | 44198950 | 44199050 | 1100-Lng-A-T | 51    | chr16:44198950-44199050 |
| chr16 | 44201150 | 44201250 | 1100-Lng-A-T | 65    | chr16:44201150-44201250 |
| chr16 | 44201150 | 44201250 | 1004-Lng-A-T | 55    | chr16:44201150-44201250 |
| chr16 | 44353950 | 44354050 | 901-Lng-A-T  | 91    | chr16:44353950-44354050 |
| chr16 | 44419450 | 44419550 | 1188-Lng-A-T | 45    | chr16:44419450-44419550 |
| chr16 | 44460750 | 44460850 | 901-Lng-A-T  | 147   | chr16:44460750-44460850 |
| chr16 | 44685650 | 44685750 | 901-Lng-C-T  | 56    | chr16:44685650-44685750 |
| chr16 | 44738850 | 44738950 | 1065-Lng-A-T | 64    | chr16:44738850-44738950 |
| chr16 | 44763450 | 44763550 | 901-Lng-C-T  | 57    | chr16:44763450-44763550 |
| chr16 | 45177150 | 45177250 | 1223-Lng-B-T | 117   | chr16:45177150-45177250 |
| chr16 | 45374150 | 45374250 | 1065-Lng-C-T | 65    | chr16:45374150-45374250 |
| chr16 | 45386950 | 45387050 | 1188-Lng-A-T | 39    | chr16:45386950-45387050 |
| chr16 | 45401650 | 45401750 | 1152-Lng-A-T | 32    | chr16:45401650-45401750 |
| chr16 | 45421950 | 45422050 | 1223-Lng-B-T | 46    | chr16:45421950-45422050 |
| chr16 | 45450750 | 45450850 | 1090-Lng-A-T | 85    | chr16:45450750-45450850 |
| chr16 | 45634350 | 45634450 | 1072-Lng-A-T | 164   | chr16:45634350-45634450 |
| chr16 | 45698150 | 45698250 | 1090-Lng-A-T | 53    | chr16:45698150-45698250 |
| chr16 | 45730250 | 45730350 | 1065-Lng-B-T | 52    | chr16:45730250-45730350 |
| chr16 | 45769350 | 45769450 | 1100-Lng-A-T | 65    | chr16:45769350-45769450 |
| chr16 | 45769750 | 45769850 | 1100-Lng-B-T | 28479 | chr16:45769750-45769850 |
| chr16 | 45770250 | 45770350 | 1100-Lng-A-T | 120   | chr16:45770250-45770350 |
| chr16 | 45797850 | 45797950 | 1223-Lng-D-T | 41    | chr16:45797850-45797950 |
| chr16 | 45803550 | 45803650 | 901-Lng-B-T  | 72    | chr16:45803550-45803650 |

**Table S2: SB Insertion regions**

|       |          |          |              |       |                         |
|-------|----------|----------|--------------|-------|-------------------------|
| chr16 | 45804250 | 45804350 | 1151-Lng-A-T | 16137 | chr16:45804250-45804350 |
| chr16 | 45841850 | 45841950 | 1167-Lng-A-T | 142   | chr16:45841850-45841950 |
| chr16 | 45863950 | 45864050 | 1223-Lng-B-T | 40    | chr16:45863950-45864050 |
| chr16 | 46460150 | 46460250 | 1223-Lng-D-T | 46    | chr16:46460150-46460250 |
| chr16 | 46491150 | 46491250 | 1072-Lng-A-T | 146   | chr16:46491150-46491250 |
| chr16 | 46574050 | 46574150 | 1151-Lng-A-T | 56    | chr16:46574050-46574150 |
| chr16 | 46658550 | 46658650 | 1151-Lng-A-T | 87    | chr16:46658550-46658650 |
| chr16 | 46658650 | 46658750 | 846-Lng-A-T  | 156   | chr16:46658650-46658750 |
| chr16 | 46695350 | 46695450 | 1065-Lng-B-T | 72    | chr16:46695350-46695450 |
| chr16 | 46807650 | 46807750 | 1090-Lng-A-T | 100   | chr16:46807650-46807750 |
| chr16 | 46908250 | 46908350 | 1065-Lng-B-T | 49    | chr16:46908250-46908350 |
| chr16 | 47085650 | 47085750 | 1151-Lng-A-T | 276   | chr16:47085650-47085750 |
| chr16 | 47126150 | 47126250 | 1065-Lng-B-T | 82    | chr16:47126150-47126250 |
| chr16 | 47129850 | 47129950 | 901-Lng-C-T  | 59    | chr16:47129850-47129950 |
| chr16 | 47158750 | 47158850 | 1072-Lng-A-T | 64    | chr16:47158750-47158850 |
| chr16 | 47325550 | 47325650 | 901-Lng-D-T  | 295   | chr16:47325550-47325650 |
| chr16 | 47371950 | 47372050 | 901-Lng-C-T  | 35    | chr16:47371950-47372050 |
| chr16 | 47418650 | 47418750 | 1004-Lng-A-T | 73    | chr16:47418650-47418750 |
| chr16 | 47486550 | 47486650 | 1090-Lng-A-T | 51    | chr16:47486550-47486650 |
| chr16 | 47673950 | 47674050 | 1072-Lng-A-T | 48    | chr16:47673950-47674050 |
| chr16 | 47766950 | 47767050 | 1065-Lng-C-T | 117   | chr16:47766950-47767050 |
| chr16 | 47805150 | 47805250 | 901-Lng-D-T  | 95    | chr16:47805150-47805250 |
| chr16 | 48072950 | 48073050 | 1167-Lng-A-T | 72    | chr16:48072950-48073050 |
| chr16 | 48869050 | 48869150 | 1090-Lng-A-T | 122   | chr16:48869050-48869150 |
| chr16 | 48991650 | 48991750 | 1223-Lng-B-T | 99    | chr16:48991650-48991750 |
| chr16 | 49136450 | 49136550 | 846-Lng-A-T  | 1330  | chr16:49136450-49136550 |
| chr16 | 49384350 | 49384450 | 901-Lng-B-T  | 199   | chr16:49384350-49384450 |
| chr16 | 49396250 | 49396350 | 1274-Lng-A-T | 71    | chr16:49396250-49396350 |
| chr16 | 49791950 | 49792050 | 1065-Lng-C-T | 66    | chr16:49791950-49792050 |
| chr16 | 49833350 | 49833450 | 1274-Lng-A-T | 73    | chr16:49833350-49833450 |
| chr16 | 49874250 | 49874350 | 901-Lng-A-T  | 106   | chr16:49874250-49874350 |
| chr16 | 49880850 | 49880950 | 901-Lng-B-T  | 287   | chr16:49880850-49880950 |
| chr16 | 49892050 | 49892150 | 901-Lng-B-T  | 120   | chr16:49892050-49892150 |
| chr16 | 49984750 | 49984850 | 846-Lng-A-T  | 701   | chr16:49984750-49984850 |
| chr16 | 50074150 | 50074250 | 1223-Lng-D-T | 41    | chr16:50074150-50074250 |
| chr16 | 50248950 | 50249050 | 901-Lng-C-T  | 65    | chr16:50248950-50249050 |
| chr16 | 50281750 | 50281850 | 1065-Lng-A-T | 50    | chr16:50281750-50281850 |
| chr16 | 50282950 | 50283050 | 901-Lng-B-T  | 85    | chr16:50282950-50283050 |
| chr16 | 50291350 | 50291450 | 1065-Lng-B-T | 52    | chr16:50291350-50291450 |
| chr16 | 50316750 | 50316850 | 1188-Lng-A-T | 59    | chr16:50316750-50316850 |
| chr16 | 50347350 | 50347450 | 1072-Lng-A-T | 87    | chr16:50347350-50347450 |
| chr16 | 50422250 | 50422350 | 1072-Lng-A-T | 82    | chr16:50422250-50422350 |
| chr16 | 50425650 | 50425750 | 1065-Lng-A-T | 64    | chr16:50425650-50425750 |
| chr16 | 50504150 | 50504250 | 1223-Lng-C-T | 43    | chr16:50504150-50504250 |
| chr16 | 50505650 | 50505750 | 1004-Lng-A-T | 50    | chr16:50505650-50505750 |
| chr16 | 50807550 | 50807650 | 901-Lng-A-T  | 209   | chr16:50807550-50807650 |



**Table S2: SB Insertion regions**

|       |          |          |              |     |                         |
|-------|----------|----------|--------------|-----|-------------------------|
| chr16 | 50812750 | 50812850 | 1065-Lng-B-T | 39  | chr16:50812750-50812850 |
| chr16 | 51063350 | 51063450 | 1274-Lng-A-T | 79  | chr16:51063350-51063450 |
| chr16 | 51075350 | 51075450 | 901-Lng-A-T  | 173 | chr16:51075350-51075450 |
| chr16 | 51117650 | 51117750 | 901-Lng-C-T  | 75  | chr16:51117650-51117750 |
| chr16 | 51337150 | 51337250 | 1065-Lng-B-T | 61  | chr16:51337150-51337250 |
| chr16 | 51477450 | 51477550 | 1090-Lng-B-T | 280 | chr16:51477450-51477550 |
| chr16 | 51651250 | 51651350 | 1065-Lng-B-T | 55  | chr16:51651250-51651350 |
| chr16 | 51737750 | 51737850 | 1065-Lng-B-T | 332 | chr16:51737750-51737850 |
| chr16 | 51885650 | 51885750 | 1151-Lng-A-T | 70  | chr16:51885650-51885750 |
| chr16 | 52009750 | 52009850 | 1223-Lng-C-T | 52  | chr16:52009750-52009850 |
| chr16 | 52015850 | 52015950 | 901-Lng-B-T  | 166 | chr16:52015850-52015950 |
| chr16 | 52045250 | 52045350 | 1065-Lng-B-T | 42  | chr16:52045250-52045350 |
| chr16 | 52082050 | 52082150 | 1100-Lng-A-T | 55  | chr16:52082050-52082150 |
| chr16 | 52123750 | 52123850 | 901-Lng-C-T  | 46  | chr16:52123750-52123850 |
| chr16 | 52142650 | 52142750 | 901-Lng-C-T  | 181 | chr16:52142650-52142750 |
| chr16 | 52145150 | 52145250 | 1090-Lng-A-T | 58  | chr16:52145150-52145250 |
| chr16 | 52146450 | 52146550 | 901-Lng-B-T  | 68  | chr16:52146450-52146550 |
| chr16 | 52150950 | 52151050 | 1274-Lng-A-T | 71  | chr16:52150950-52151050 |
| chr16 | 52161450 | 52161550 | 1065-Lng-A-T | 72  | chr16:52161450-52161550 |
| chr16 | 52258450 | 52258550 | 1100-Lng-A-T | 59  | chr16:52258450-52258550 |
| chr16 | 52267350 | 52267450 | 1065-Lng-A-T | 61  | chr16:52267350-52267450 |
| chr16 | 52279850 | 52279950 | 1100-Lng-A-T | 100 | chr16:52279850-52279950 |
| chr16 | 52294950 | 52295050 | 1188-Lng-A-T | 36  | chr16:52294950-52295050 |
| chr16 | 52299050 | 52299150 | 846-Lng-A-T  | 205 | chr16:52299050-52299150 |
| chr16 | 52316950 | 52317050 | 846-Lng-A-T  | 127 | chr16:52316950-52317050 |
| chr16 | 52324550 | 52324650 | 1188-Lng-A-T | 39  | chr16:52324550-52324650 |
| chr16 | 52341050 | 52341150 | 1223-Lng-A-T | 66  | chr16:52341050-52341150 |
| chr16 | 52361650 | 52361750 | 1151-Lng-A-T | 139 | chr16:52361650-52361750 |
| chr16 | 52364450 | 52364550 | 901-Lng-A-T  | 72  | chr16:52364450-52364550 |
| chr16 | 52402650 | 52402750 | 1090-Lng-A-T | 54  | chr16:52402650-52402750 |
| chr16 | 52438250 | 52438350 | 1223-Lng-D-T | 62  | chr16:52438250-52438350 |
| chr16 | 52703850 | 52703950 | 1223-Lng-D-T | 89  | chr16:52703850-52703950 |
| chr16 | 53056350 | 53056450 | 1065-Lng-A-T | 109 | chr16:53056350-53056450 |
| chr16 | 53069550 | 53069650 | 1065-Lng-A-T | 68  | chr16:53069550-53069650 |
| chr16 | 53152350 | 53152450 | 1004-Lng-A-T | 79  | chr16:53152350-53152450 |
| chr16 | 53189850 | 53189950 | 846-Lng-A-T  | 193 | chr16:53189850-53189950 |
| chr16 | 53543850 | 53543950 | 1072-Lng-A-T | 83  | chr16:53543850-53543950 |
| chr16 | 53624250 | 53624350 | 1065-Lng-C-T | 66  | chr16:53624250-53624350 |
| chr16 | 53793850 | 53793950 | 1223-Lng-A-T | 163 | chr16:53793850-53793950 |
| chr16 | 53931450 | 53931550 | 1065-Lng-B-T | 45  | chr16:53931450-53931550 |
| chr16 | 54197050 | 54197150 | 1223-Lng-B-T | 40  | chr16:54197050-54197150 |
| chr16 | 54417850 | 54417950 | 846-Lng-A-T  | 121 | chr16:54417850-54417950 |
| chr16 | 54709050 | 54709150 | 901-Lng-A-T  | 105 | chr16:54709050-54709150 |
| chr16 | 54790550 | 54790650 | 846-Lng-A-T  | 45  | chr16:54790550-54790650 |
| chr16 | 54804450 | 54804550 | 1072-Lng-A-T | 53  | chr16:54804450-54804550 |
| chr16 | 55036450 | 55036550 | 901-Lng-C-T  | 83  | chr16:55036450-55036550 |

**Table S2: SB Insertion regions**

|       |          |          |              |      |                         |
|-------|----------|----------|--------------|------|-------------------------|
| chr16 | 55043850 | 55043950 | 1274-Lng-A-T | 99   | chr16:55043850-55043950 |
| chr16 | 55321250 | 55321350 | 1090-Lng-B-T | 1124 | chr16:55321250-55321350 |
| chr16 | 55347750 | 55347850 | 1100-Lng-B-T | 50   | chr16:55347750-55347850 |
| chr16 | 55350750 | 55350850 | 1223-Lng-C-T | 44   | chr16:55350750-55350850 |
| chr16 | 55576550 | 55576650 | 1167-Lng-A-T | 170  | chr16:55576550-55576650 |
| chr16 | 55661750 | 55661850 | 1090-Lng-A-T | 75   | chr16:55661750-55661850 |
| chr16 | 55692850 | 55692950 | 1072-Lng-A-T | 82   | chr16:55692850-55692950 |
| chr16 | 55707350 | 55707450 | 901-Lng-A-T  | 76   | chr16:55707350-55707450 |
| chr16 | 55811950 | 55812050 | 1152-Lng-A-T | 41   | chr16:55811950-55812050 |
| chr16 | 55838250 | 55838350 | 1004-Lng-A-T | 93   | chr16:55838250-55838350 |
| chr16 | 55847850 | 55847950 | 1090-Lng-A-T | 45   | chr16:55847850-55847950 |
| chr16 | 55850450 | 55850550 | 901-Lng-D-T  | 314  | chr16:55850450-55850550 |
| chr16 | 55972050 | 55972150 | 1090-Lng-B-T | 324  | chr16:55972050-55972150 |
| chr16 | 55973350 | 55973450 | 1100-Lng-A-T | 257  | chr16:55973350-55973450 |
| chr16 | 55983350 | 55983450 | 1223-Lng-D-T | 49   | chr16:55983350-55983450 |
| chr16 | 56008250 | 56008350 | 1151-Lng-A-T | 692  | chr16:56008250-56008350 |
| chr16 | 56032350 | 56032450 | 1065-Lng-C-T | 94   | chr16:56032350-56032450 |
| chr16 | 56081650 | 56081750 | 1151-Lng-A-T | 79   | chr16:56081650-56081750 |
| chr16 | 56108150 | 56108250 | 901-Lng-A-T  | 66   | chr16:56108150-56108250 |
| chr16 | 56133550 | 56133650 | 901-Lng-B-T  | 138  | chr16:56133550-56133650 |
| chr16 | 56147150 | 56147250 | 1090-Lng-A-T | 66   | chr16:56147150-56147250 |
| chr16 | 56392850 | 56392950 | 901-Lng-A-T  | 384  | chr16:56392850-56392950 |
| chr16 | 56399050 | 56399150 | 901-Lng-D-T  | 139  | chr16:56399050-56399150 |
| chr16 | 56698150 | 56698250 | 1090-Lng-A-T | 53   | chr16:56698150-56698250 |
| chr16 | 56705650 | 56705750 | 1167-Lng-A-T | 46   | chr16:56705650-56705750 |
| chr16 | 57127750 | 57127850 | 1090-Lng-A-T | 65   | chr16:57127750-57127850 |
| chr16 | 57128150 | 57128250 | 1065-Lng-C-T | 84   | chr16:57128150-57128250 |
| chr16 | 57131050 | 57131150 | 1223-Lng-D-T | 51   | chr16:57131050-57131150 |
| chr16 | 57131550 | 57131650 | 1090-Lng-A-T | 76   | chr16:57131550-57131650 |
| chr16 | 57159050 | 57159150 | 901-Lng-A-T  | 105  | chr16:57159050-57159150 |
| chr16 | 57176950 | 57177050 | 1223-Lng-D-T | 46   | chr16:57176950-57177050 |
| chr16 | 57225250 | 57225350 | 1223-Lng-C-T | 61   | chr16:57225250-57225350 |
| chr16 | 57248650 | 57248750 | 901-Lng-B-T  | 111  | chr16:57248650-57248750 |
| chr16 | 57392850 | 57392950 | 1072-Lng-A-T | 56   | chr16:57392850-57392950 |
| chr16 | 57398950 | 57399050 | 1100-Lng-A-T | 147  | chr16:57398950-57399050 |
| chr16 | 57570950 | 57571050 | 1100-Lng-A-T | 63   | chr16:57570950-57571050 |
| chr16 | 57692250 | 57692350 | 1152-Lng-A-T | 34   | chr16:57692250-57692350 |
| chr16 | 57879650 | 57879750 | 1065-Lng-B-T | 59   | chr16:57879650-57879750 |
| chr16 | 57917550 | 57917650 | 1072-Lng-A-T | 105  | chr16:57917550-57917650 |
| chr16 | 58136550 | 58136650 | 901-Lng-A-T  | 62   | chr16:58136550-58136650 |
| chr16 | 58432350 | 58432450 | 1065-Lng-B-T | 161  | chr16:58432350-58432450 |
| chr16 | 58482650 | 58482750 | 1223-Lng-B-T | 110  | chr16:58482650-58482750 |
| chr16 | 58487450 | 58487550 | 1223-Lng-B-T | 196  | chr16:58487450-58487550 |
| chr16 | 58493750 | 58493850 | 1090-Lng-A-T | 83   | chr16:58493750-58493850 |
| chr16 | 58499950 | 58500050 | 1065-Lng-A-T | 66   | chr16:58499950-58500050 |
| chr16 | 58574650 | 58574750 | 901-Lng-D-T  | 301  | chr16:58574650-58574750 |

**Table S2: SB Insertion regions**

|       |          |          |              |     |                         |
|-------|----------|----------|--------------|-----|-------------------------|
| chr16 | 58725150 | 58725250 | 1065-Lng-C-T | 80  | chr16:58725150-58725250 |
| chr16 | 58822250 | 58822350 | 1065-Lng-B-T | 44  | chr16:58822250-58822350 |
| chr16 | 59487650 | 59487750 | 1004-Lng-A-T | 67  | chr16:59487650-59487750 |
| chr16 | 59666650 | 59666750 | 1065-Lng-A-T | 63  | chr16:59666650-59666750 |
| chr16 | 59717150 | 59717250 | 901-Lng-A-T  | 122 | chr16:59717150-59717250 |
| chr16 | 60208350 | 60208450 | 1167-Lng-A-T | 58  | chr16:60208350-60208450 |
| chr16 | 60465750 | 60465850 | 1090-Lng-A-T | 129 | chr16:60465750-60465850 |
| chr16 | 60497850 | 60497950 | 1065-Lng-C-T | 95  | chr16:60497850-60497950 |
| chr16 | 60589450 | 60589550 | 1223-Lng-D-T | 50  | chr16:60589450-60589550 |
| chr16 | 60648850 | 60648950 | 846-Lng-A-T  | 172 | chr16:60648850-60648950 |
| chr16 | 60916250 | 60916350 | 1152-Lng-A-T | 126 | chr16:60916250-60916350 |
| chr16 | 60986950 | 60987050 | 901-Lng-C-T  | 51  | chr16:60986950-60987050 |
| chr16 | 61143550 | 61143650 | 1072-Lng-A-T | 60  | chr16:61143550-61143650 |
| chr16 | 61350550 | 61350650 | 1223-Lng-B-T | 44  | chr16:61350550-61350650 |
| chr16 | 61358750 | 61358850 | 901-Lng-A-T  | 96  | chr16:61358750-61358850 |
| chr16 | 61483750 | 61483850 | 901-Lng-A-T  | 178 | chr16:61483750-61483850 |
| chr16 | 61628650 | 61628750 | 1072-Lng-A-T | 135 | chr16:61628650-61628750 |
| chr16 | 61651750 | 61651850 | 901-Lng-A-T  | 61  | chr16:61651750-61651850 |
| chr16 | 61687450 | 61687550 | 1065-Lng-A-T | 34  | chr16:61687450-61687550 |
| chr16 | 61729450 | 61729550 | 901-Lng-B-T  | 73  | chr16:61729450-61729550 |
| chr16 | 61751950 | 61752050 | 1090-Lng-A-T | 46  | chr16:61751950-61752050 |
| chr16 | 61765350 | 61765450 | 1065-Lng-C-T | 64  | chr16:61765350-61765450 |
| chr16 | 61793550 | 61793650 | 901-Lng-C-T  | 30  | chr16:61793550-61793650 |
| chr16 | 61811750 | 61811850 | 1004-Lng-A-T | 51  | chr16:61811750-61811850 |
| chr16 | 61824250 | 61824350 | 1072-Lng-A-T | 165 | chr16:61824250-61824350 |
| chr16 | 61966750 | 61966850 | 1004-Lng-A-T | 51  | chr16:61966750-61966850 |
| chr16 | 62041250 | 62041350 | 1004-Lng-A-T | 58  | chr16:62041250-62041350 |
| chr16 | 62122050 | 62122150 | 1072-Lng-A-T | 50  | chr16:62122050-62122150 |
| chr16 | 62183250 | 62183350 | 901-Lng-A-T  | 225 | chr16:62183250-62183350 |
| chr16 | 62221550 | 62221650 | 901-Lng-A-T  | 103 | chr16:62221550-62221650 |
| chr16 | 62241950 | 62242050 | 1065-Lng-C-T | 81  | chr16:62241950-62242050 |
| chr16 | 62338050 | 62338150 | 1223-Lng-C-T | 50  | chr16:62338050-62338150 |
| chr16 | 62513750 | 62513850 | 1004-Lng-A-T | 80  | chr16:62513750-62513850 |
| chr16 | 62674950 | 62675050 | 901-Lng-A-T  | 182 | chr16:62674950-62675050 |
| chr16 | 62702750 | 62702850 | 1065-Lng-B-T | 81  | chr16:62702750-62702850 |
| chr16 | 62725850 | 62725950 | 1065-Lng-B-T | 75  | chr16:62725850-62725950 |
| chr16 | 62768550 | 62768650 | 1223-Lng-A-T | 195 | chr16:62768550-62768650 |
| chr16 | 62776950 | 62777050 | 1004-Lng-A-T | 95  | chr16:62776950-62777050 |
| chr16 | 62796350 | 62796450 | 901-Lng-C-T  | 35  | chr16:62796350-62796450 |
| chr16 | 62808650 | 62808750 | 1065-Lng-B-T | 62  | chr16:62808650-62808750 |
| chr16 | 62833950 | 62834050 | 901-Lng-D-T  | 292 | chr16:62833950-62834050 |
| chr16 | 62835450 | 62835550 | 1090-Lng-B-T | 230 | chr16:62835450-62835550 |
| chr16 | 62910550 | 62910650 | 901-Lng-D-T  | 204 | chr16:62910550-62910650 |
| chr16 | 63085450 | 63085550 | 901-Lng-C-T  | 118 | chr16:63085450-63085550 |
| chr16 | 63176750 | 63176850 | 1223-Lng-B-T | 40  | chr16:63176750-63176850 |
| chr16 | 63186350 | 63186450 | 1065-Lng-B-T | 47  | chr16:63186350-63186450 |

**Table S2: SB Insertion regions**

|       |          |          |              |      |                         |
|-------|----------|----------|--------------|------|-------------------------|
| chr16 | 63204350 | 63204450 | 901-Lng-C-T  | 193  | chr16:63204350-63204450 |
| chr16 | 63208050 | 63208150 | 846-Lng-A-T  | 127  | chr16:63208050-63208150 |
| chr16 | 63265450 | 63265550 | 1223-Lng-B-T | 60   | chr16:63265450-63265550 |
| chr16 | 63339950 | 63340050 | 1223-Lng-B-T | 41   | chr16:63339950-63340050 |
| chr16 | 63504250 | 63504350 | 1090-Lng-A-T | 44   | chr16:63504250-63504350 |
| chr16 | 63554050 | 63554150 | 1004-Lng-A-T | 74   | chr16:63554050-63554150 |
| chr16 | 63674350 | 63674450 | 1065-Lng-B-T | 105  | chr16:63674350-63674450 |
| chr16 | 63753150 | 63753250 | 1100-Lng-A-T | 56   | chr16:63753150-63753250 |
| chr16 | 63822550 | 63822650 | 901-Lng-B-T  | 186  | chr16:63822550-63822650 |
| chr16 | 63892250 | 63892350 | 1065-Lng-C-T | 70   | chr16:63892250-63892350 |
| chr16 | 63894650 | 63894750 | 1274-Lng-A-T | 63   | chr16:63894650-63894750 |
| chr16 | 63917750 | 63917850 | 901-Lng-A-T  | 138  | chr16:63917750-63917850 |
| chr16 | 63956850 | 63956950 | 1223-Lng-A-T | 114  | chr16:63956850-63956950 |
| chr16 | 63982550 | 63982650 | 1100-Lng-B-T | 51   | chr16:63982550-63982650 |
| chr16 | 64081350 | 64081450 | 901-Lng-D-T  | 325  | chr16:64081350-64081450 |
| chr16 | 64143950 | 64144050 | 1188-Lng-A-T | 430  | chr16:64143950-64144050 |
| chr16 | 64294050 | 64294150 | 901-Lng-C-T  | 80   | chr16:64294050-64294150 |
| chr16 | 64300750 | 64300850 | 1065-Lng-B-T | 104  | chr16:64300750-64300850 |
| chr16 | 64301650 | 64301750 | 1072-Lng-A-T | 66   | chr16:64301650-64301750 |
| chr16 | 64503750 | 64503850 | 1223-Lng-C-T | 55   | chr16:64503750-64503850 |
| chr16 | 64768650 | 64768750 | 1065-Lng-B-T | 75   | chr16:64768650-64768750 |
| chr16 | 64816850 | 64816950 | 1223-Lng-C-T | 45   | chr16:64816850-64816950 |
| chr16 | 64825550 | 64825650 | 1223-Lng-B-T | 353  | chr16:64825550-64825650 |
| chr16 | 64840350 | 64840450 | 1090-Lng-A-T | 104  | chr16:64840350-64840450 |
| chr16 | 64943650 | 64943750 | 901-Lng-B-T  | 36   | chr16:64943650-64943750 |
| chr16 | 64963750 | 64963850 | 1065-Lng-A-T | 38   | chr16:64963750-64963850 |
| chr16 | 65304150 | 65304250 | 1004-Lng-A-T | 54   | chr16:65304150-65304250 |
| chr16 | 65444350 | 65444450 | 1274-Lng-A-T | 185  | chr16:65444350-65444450 |
| chr16 | 65499250 | 65499350 | 1065-Lng-C-T | 1891 | chr16:65499250-65499350 |
| chr16 | 65546550 | 65546650 | 1223-Lng-B-T | 35   | chr16:65546550-65546650 |
| chr16 | 65567150 | 65567250 | 901-Lng-B-T  | 48   | chr16:65567150-65567250 |
| chr16 | 65718350 | 65718450 | 1090-Lng-A-T | 63   | chr16:65718350-65718450 |
| chr16 | 65735050 | 65735150 | 1090-Lng-A-T | 119  | chr16:65735050-65735150 |
| chr16 | 65837550 | 65837650 | 1223-Lng-B-T | 225  | chr16:65837550-65837650 |
| chr16 | 65987850 | 65987950 | 846-Lng-A-T  | 51   | chr16:65987850-65987950 |
| chr16 | 66197850 | 66197950 | 1223-Lng-D-T | 41   | chr16:66197850-66197950 |
| chr16 | 66348150 | 66348250 | 1223-Lng-B-T | 189  | chr16:66348150-66348250 |
| chr16 | 66410650 | 66410750 | 901-Lng-C-T  | 125  | chr16:66410650-66410750 |
| chr16 | 66787350 | 66787450 | 1274-Lng-A-T | 73   | chr16:66787350-66787450 |
| chr16 | 66879950 | 66880050 | 1223-Lng-A-T | 68   | chr16:66879950-66880050 |
| chr16 | 66921350 | 66921450 | 1065-Lng-A-T | 71   | chr16:66921350-66921450 |
| chr16 | 66945150 | 66945250 | 901-Lng-D-T  | 433  | chr16:66945150-66945250 |
| chr16 | 66975650 | 66975750 | 1065-Lng-B-T | 43   | chr16:66975650-66975750 |
| chr16 | 67011250 | 67011350 | 1065-Lng-A-T | 49   | chr16:67011250-67011350 |
| chr16 | 67021150 | 67021250 | 1065-Lng-A-T | 64   | chr16:67021150-67021250 |
| chr16 | 67093750 | 67093850 | 901-Lng-D-T  | 52   | chr16:67093750-67093850 |

**Table S2: SB Insertion regions**

|       |          |          |              |      |                         |
|-------|----------|----------|--------------|------|-------------------------|
| chr16 | 67183650 | 67183750 | 1152-Lng-A-T | 297  | chr16:67183650-67183750 |
| chr16 | 67258050 | 67258150 | 1004-Lng-A-T | 66   | chr16:67258050-67258150 |
| chr16 | 67534050 | 67534150 | 846-Lng-A-T  | 631  | chr16:67534050-67534150 |
| chr16 | 67578950 | 67579050 | 1100-Lng-A-T | 80   | chr16:67578950-67579050 |
| chr16 | 67733450 | 67733550 | 901-Lng-D-T  | 529  | chr16:67733450-67733550 |
| chr16 | 67755550 | 67755650 | 1223-Lng-A-T | 1976 | chr16:67755550-67755650 |
| chr16 | 67773550 | 67773650 | 1188-Lng-A-T | 34   | chr16:67773550-67773650 |
| chr16 | 67782350 | 67782450 | 1152-Lng-A-T | 116  | chr16:67782350-67782450 |
| chr16 | 67901450 | 67901550 | 901-Lng-B-T  | 148  | chr16:67901450-67901550 |
| chr16 | 67958150 | 67958250 | 1090-Lng-B-T | 86   | chr16:67958150-67958250 |
| chr16 | 67974550 | 67974650 | 1065-Lng-A-T | 44   | chr16:67974550-67974650 |
| chr16 | 67974550 | 67974650 | 1065-Lng-C-T | 75   | chr16:67974550-67974650 |
| chr16 | 67974550 | 67974650 | 901-Lng-D-T  | 81   | chr16:67974550-67974650 |
| chr16 | 67974550 | 67974650 | 1152-Lng-A-T | 47   | chr16:67974550-67974650 |
| chr16 | 67974550 | 67974650 | 846-Lng-A-T  | 78   | chr16:67974550-67974650 |
| chr16 | 67974550 | 67974650 | 1188-Lng-A-T | 60   | chr16:67974550-67974650 |
| chr16 | 67974550 | 67974650 | 901-Lng-A-T  | 91   | chr16:67974550-67974650 |
| chr16 | 67974550 | 67974650 | 901-Lng-C-T  | 36   | chr16:67974550-67974650 |
| chr16 | 67974550 | 67974650 | 1072-Lng-A-T | 63   | chr16:67974550-67974650 |
| chr16 | 68220850 | 68220950 | 901-Lng-D-T  | 77   | chr16:68220850-68220950 |
| chr16 | 68235950 | 68236050 | 1004-Lng-A-T | 78   | chr16:68235950-68236050 |
| chr16 | 68240750 | 68240850 | 1100-Lng-A-T | 129  | chr16:68240750-68240850 |
| chr16 | 68267950 | 68268050 | 901-Lng-B-T  | 160  | chr16:68267950-68268050 |
| chr16 | 68286650 | 68286750 | 901-Lng-A-T  | 426  | chr16:68286650-68286750 |
| chr16 | 68323750 | 68323850 | 1100-Lng-A-T | 179  | chr16:68323750-68323850 |
| chr16 | 68413550 | 68413650 | 901-Lng-A-T  | 142  | chr16:68413550-68413650 |
| chr16 | 68556450 | 68556550 | 901-Lng-A-T  | 128  | chr16:68556450-68556550 |
| chr16 | 68585450 | 68585550 | 1223-Lng-D-T | 40   | chr16:68585450-68585550 |
| chr16 | 68645650 | 68645750 | 1065-Lng-B-T | 80   | chr16:68645650-68645750 |
| chr16 | 68780150 | 68780250 | 1065-Lng-A-T | 45   | chr16:68780150-68780250 |
| chr16 | 68826750 | 68826850 | 1065-Lng-C-T | 115  | chr16:68826750-68826850 |
| chr16 | 69090950 | 69091050 | 1100-Lng-B-T | 51   | chr16:69090950-69091050 |
| chr16 | 69138750 | 69138850 | 1152-Lng-A-T | 38   | chr16:69138750-69138850 |
| chr16 | 69222150 | 69222250 | 901-Lng-D-T  | 56   | chr16:69222150-69222250 |
| chr16 | 69399550 | 69399650 | 901-Lng-D-T  | 95   | chr16:69399550-69399650 |
| chr16 | 69644550 | 69644650 | 846-Lng-A-T  | 100  | chr16:69644550-69644650 |
| chr16 | 69810350 | 69810450 | 1072-Lng-A-T | 49   | chr16:69810350-69810450 |
| chr16 | 69988050 | 69988150 | 1188-Lng-A-T | 47   | chr16:69988050-69988150 |
| chr16 | 70082750 | 70082850 | 1065-Lng-A-T | 40   | chr16:70082750-70082850 |
| chr16 | 70113750 | 70113850 | 1004-Lng-A-T | 96   | chr16:70113750-70113850 |
| chr16 | 70163250 | 70163350 | 846-Lng-A-T  | 308  | chr16:70163250-70163350 |
| chr16 | 70348550 | 70348650 | 1223-Lng-C-T | 103  | chr16:70348550-70348650 |
| chr16 | 70366250 | 70366350 | 1065-Lng-B-T | 241  | chr16:70366250-70366350 |
| chr16 | 70437350 | 70437450 | 1188-Lng-A-T | 36   | chr16:70437350-70437450 |
| chr16 | 70439550 | 70439650 | 901-Lng-A-T  | 86   | chr16:70439550-70439650 |
| chr16 | 70472150 | 70472250 | 901-Lng-A-T  | 116  | chr16:70472150-70472250 |

**Table S2: SB Insertion regions**

|       |          |          |              |      |                         |
|-------|----------|----------|--------------|------|-------------------------|
| chr16 | 70536050 | 70536150 | 1065-Lng-A-T | 99   | chr16:70536050-70536150 |
| chr16 | 70797450 | 70797550 | 1151-Lng-A-T | 56   | chr16:70797450-70797550 |
| chr16 | 70836750 | 70836850 | 1223-Lng-A-T | 75   | chr16:70836750-70836850 |
| chr16 | 70862350 | 70862450 | 1065-Lng-A-T | 68   | chr16:70862350-70862450 |
| chr16 | 70993350 | 70993450 | 1100-Lng-A-T | 82   | chr16:70993350-70993450 |
| chr16 | 71009250 | 71009350 | 1223-Lng-A-T | 117  | chr16:71009250-71009350 |
| chr16 | 71206850 | 71206950 | 1004-Lng-A-T | 95   | chr16:71206850-71206950 |
| chr16 | 71390150 | 71390250 | 1223-Lng-A-T | 55   | chr16:71390150-71390250 |
| chr16 | 71572050 | 71572150 | 901-Lng-A-T  | 129  | chr16:71572050-71572150 |
| chr16 | 71655650 | 71655750 | 1065-Lng-C-T | 442  | chr16:71655650-71655750 |
| chr16 | 71720750 | 71720850 | 1072-Lng-A-T | 49   | chr16:71720750-71720850 |
| chr16 | 71817450 | 71817550 | 1072-Lng-A-T | 155  | chr16:71817450-71817550 |
| chr16 | 71817650 | 71817750 | 1100-Lng-A-T | 53   | chr16:71817650-71817750 |
| chr16 | 71867350 | 71867450 | 1188-Lng-A-T | 85   | chr16:71867350-71867450 |
| chr16 | 72150350 | 72150450 | 1223-Lng-C-T | 46   | chr16:72150350-72150450 |
| chr16 | 72225550 | 72225650 | 1065-Lng-C-T | 110  | chr16:72225550-72225650 |
| chr16 | 72227450 | 72227550 | 1065-Lng-C-T | 276  | chr16:72227450-72227550 |
| chr16 | 72310350 | 72310450 | 1065-Lng-A-T | 90   | chr16:72310350-72310450 |
| chr16 | 72748250 | 72748350 | 846-Lng-A-T  | 68   | chr16:72748250-72748350 |
| chr16 | 72800550 | 72800650 | 1100-Lng-A-T | 96   | chr16:72800550-72800650 |
| chr16 | 72933450 | 72933550 | 901-Lng-D-T  | 304  | chr16:72933450-72933550 |
| chr16 | 73166450 | 73166550 | 1090-Lng-B-T | 1398 | chr16:73166450-73166550 |
| chr16 | 73175450 | 73175550 | 901-Lng-A-T  | 170  | chr16:73175450-73175550 |
| chr16 | 73256850 | 73256950 | 1065-Lng-B-T | 46   | chr16:73256850-73256950 |
| chr16 | 73258350 | 73258450 | 1188-Lng-A-T | 56   | chr16:73258350-73258450 |
| chr16 | 73276250 | 73276350 | 1004-Lng-A-T | 63   | chr16:73276250-73276350 |
| chr16 | 73371650 | 73371750 | 1090-Lng-B-T | 274  | chr16:73371650-73371750 |
| chr16 | 73458550 | 73458650 | 1065-Lng-C-T | 120  | chr16:73458550-73458650 |
| chr16 | 73555150 | 73555250 | 1072-Lng-A-T | 192  | chr16:73555150-73555250 |
| chr16 | 73578350 | 73578450 | 846-Lng-A-T  | 132  | chr16:73578350-73578450 |
| chr16 | 73697250 | 73697350 | 1223-Lng-B-T | 36   | chr16:73697250-73697350 |
| chr16 | 74278050 | 74278150 | 1065-Lng-C-T | 82   | chr16:74278050-74278150 |
| chr16 | 74291250 | 74291350 | 1065-Lng-A-T | 132  | chr16:74291250-74291350 |
| chr16 | 74349350 | 74349450 | 1065-Lng-C-T | 1246 | chr16:74349350-74349450 |
| chr16 | 74516350 | 74516450 | 1072-Lng-A-T | 59   | chr16:74516350-74516450 |
| chr16 | 74711050 | 74711150 | 1072-Lng-A-T | 48   | chr16:74711050-74711150 |
| chr16 | 74801250 | 74801350 | 846-Lng-A-T  | 72   | chr16:74801250-74801350 |
| chr16 | 74853450 | 74853550 | 901-Lng-A-T  | 74   | chr16:74853450-74853550 |
| chr16 | 74930450 | 74930550 | 901-Lng-B-T  | 164  | chr16:74930450-74930550 |
| chr16 | 74993250 | 74993350 | 1090-Lng-B-T | 272  | chr16:74993250-74993350 |
| chr16 | 75019550 | 75019650 | 901-Lng-A-T  | 69   | chr16:75019550-75019650 |
| chr16 | 75029550 | 75029650 | 1223-Lng-C-T | 51   | chr16:75029550-75029650 |
| chr16 | 75080950 | 75081050 | 1090-Lng-B-T | 345  | chr16:75080950-75081050 |
| chr16 | 75149450 | 75149550 | 1090-Lng-A-T | 59   | chr16:75149450-75149550 |
| chr16 | 75251350 | 75251450 | 1065-Lng-B-T | 66   | chr16:75251350-75251450 |
| chr16 | 75312550 | 75312650 | 1065-Lng-A-T | 38   | chr16:75312550-75312650 |

**Table S2: SB Insertion regions**

|       |          |          |              |      |                         |
|-------|----------|----------|--------------|------|-------------------------|
| chr16 | 75355650 | 75355750 | 1100-Lng-A-T | 51   | chr16:75355650-75355750 |
| chr16 | 75590450 | 75590550 | 1223-Lng-D-T | 49   | chr16:75590450-75590550 |
| chr16 | 75771450 | 75771550 | 1065-Lng-C-T | 83   | chr16:75771450-75771550 |
| chr16 | 75805450 | 75805550 | 1065-Lng-A-T | 48   | chr16:75805450-75805550 |
| chr16 | 76018550 | 76018650 | 1223-Lng-C-T | 50   | chr16:76018550-76018650 |
| chr16 | 76309350 | 76309450 | 1072-Lng-A-T | 58   | chr16:76309350-76309450 |
| chr16 | 76342250 | 76342350 | 1274-Lng-A-T | 61   | chr16:76342250-76342350 |
| chr16 | 76355450 | 76355550 | 1004-Lng-A-T | 51   | chr16:76355450-76355550 |
| chr16 | 76397050 | 76397150 | 1065-Lng-A-T | 49   | chr16:76397050-76397150 |
| chr16 | 76466650 | 76466750 | 1188-Lng-A-T | 45   | chr16:76466650-76466750 |
| chr16 | 76568850 | 76568950 | 901-Lng-C-T  | 57   | chr16:76568850-76568950 |
| chr16 | 76603450 | 76603550 | 1065-Lng-C-T | 92   | chr16:76603450-76603550 |
| chr16 | 76660850 | 76660950 | 1065-Lng-B-T | 90   | chr16:76660850-76660950 |
| chr16 | 76725050 | 76725150 | 901-Lng-A-T  | 82   | chr16:76725050-76725150 |
| chr16 | 76740350 | 76740450 | 1065-Lng-A-T | 231  | chr16:76740350-76740450 |
| chr16 | 76796250 | 76796350 | 1223-Lng-A-T | 132  | chr16:76796250-76796350 |
| chr16 | 77018850 | 77018950 | 1223-Lng-A-T | 190  | chr16:77018850-77018950 |
| chr16 | 77039550 | 77039650 | 1223-Lng-B-T | 81   | chr16:77039550-77039650 |
| chr16 | 77075450 | 77075550 | 1004-Lng-A-T | 57   | chr16:77075450-77075550 |
| chr16 | 77090250 | 77090350 | 1065-Lng-B-T | 72   | chr16:77090250-77090350 |
| chr16 | 77105750 | 77105850 | 1167-Lng-A-T | 71   | chr16:77105750-77105850 |
| chr16 | 77180450 | 77180550 | 1065-Lng-A-T | 84   | chr16:77180450-77180550 |
| chr16 | 77352050 | 77352150 | 901-Lng-C-T  | 45   | chr16:77352050-77352150 |
| chr16 | 77403050 | 77403150 | 1065-Lng-C-T | 71   | chr16:77403050-77403150 |
| chr16 | 77404150 | 77404250 | 1065-Lng-C-T | 2564 | chr16:77404150-77404250 |
| chr16 | 77407950 | 77408050 | 1090-Lng-A-T | 556  | chr16:77407950-77408050 |
| chr16 | 77464450 | 77464550 | 1151-Lng-A-T | 60   | chr16:77464450-77464550 |
| chr16 | 77464950 | 77465050 | 1065-Lng-C-T | 63   | chr16:77464950-77465050 |
| chr16 | 77470850 | 77470950 | 1004-Lng-A-T | 205  | chr16:77470850-77470950 |
| chr16 | 77537850 | 77537950 | 1072-Lng-A-T | 63   | chr16:77537850-77537950 |
| chr16 | 77601150 | 77601250 | 1152-Lng-A-T | 85   | chr16:77601150-77601250 |
| chr16 | 77607750 | 77607850 | 901-Lng-B-T  | 130  | chr16:77607750-77607850 |
| chr16 | 77633450 | 77633550 | 901-Lng-D-T  | 362  | chr16:77633450-77633550 |
| chr16 | 77675850 | 77675950 | 1223-Lng-A-T | 158  | chr16:77675850-77675950 |
| chr16 | 77676750 | 77676850 | 1223-Lng-D-T | 47   | chr16:77676750-77676850 |
| chr16 | 77689750 | 77689850 | 901-Lng-A-T  | 63   | chr16:77689750-77689850 |
| chr16 | 78039750 | 78039850 | 901-Lng-D-T  | 269  | chr16:78039750-78039850 |
| chr16 | 78331350 | 78331450 | 901-Lng-B-T  | 47   | chr16:78331350-78331450 |
| chr16 | 78338250 | 78338350 | 1223-Lng-A-T | 5936 | chr16:78338250-78338350 |
| chr16 | 78363850 | 78363950 | 846-Lng-A-T  | 893  | chr16:78363850-78363950 |
| chr16 | 78584950 | 78585050 | 901-Lng-A-T  | 79   | chr16:78584950-78585050 |
| chr16 | 78604950 | 78605050 | 846-Lng-A-T  | 98   | chr16:78604950-78605050 |
| chr16 | 78709450 | 78709550 | 901-Lng-B-T  | 145  | chr16:78709450-78709550 |
| chr16 | 78835850 | 78835950 | 1065-Lng-C-T | 67   | chr16:78835850-78835950 |
| chr16 | 79304650 | 79304750 | 1188-Lng-A-T | 61   | chr16:79304650-79304750 |
| chr16 | 79420450 | 79420550 | 1223-Lng-D-T | 47   | chr16:79420450-79420550 |

**Table S2: SB Insertion regions**

|       |          |          |              |      |                         |
|-------|----------|----------|--------------|------|-------------------------|
| chr16 | 79458050 | 79458150 | 1152-Lng-A-T | 39   | chr16:79458050-79458150 |
| chr16 | 79892950 | 79893050 | 1090-Lng-B-T | 391  | chr16:79892950-79893050 |
| chr16 | 79905750 | 79905850 | 1090-Lng-A-T | 101  | chr16:79905750-79905850 |
| chr16 | 80330850 | 80330950 | 1065-Lng-A-T | 56   | chr16:80330850-80330950 |
| chr16 | 80532650 | 80532750 | 1065-Lng-B-T | 98   | chr16:80532650-80532750 |
| chr16 | 80582550 | 80582650 | 1065-Lng-B-T | 76   | chr16:80582550-80582650 |
| chr16 | 80936650 | 80936750 | 1223-Lng-B-T | 386  | chr16:80936650-80936750 |
| chr16 | 81010750 | 81010850 | 1090-Lng-A-T | 56   | chr16:81010750-81010850 |
| chr16 | 81203650 | 81203750 | 846-Lng-A-T  | 63   | chr16:81203650-81203750 |
| chr16 | 81353850 | 81353950 | 1167-Lng-A-T | 67   | chr16:81353850-81353950 |
| chr16 | 81380550 | 81380650 | 1223-Lng-B-T | 38   | chr16:81380550-81380650 |
| chr16 | 81792350 | 81792450 | 1065-Lng-A-T | 76   | chr16:81792350-81792450 |
| chr16 | 81841450 | 81841550 | 1004-Lng-A-T | 61   | chr16:81841450-81841550 |
| chr16 | 82143550 | 82143650 | 846-Lng-A-T  | 67   | chr16:82143550-82143650 |
| chr16 | 82193450 | 82193550 | 1072-Lng-A-T | 48   | chr16:82193450-82193550 |
| chr16 | 82379650 | 82379750 | 1072-Lng-A-T | 54   | chr16:82379650-82379750 |
| chr16 | 82516750 | 82516850 | 1223-Lng-B-T | 88   | chr16:82516750-82516850 |
| chr16 | 82540450 | 82540550 | 1223-Lng-A-T | 169  | chr16:82540450-82540550 |
| chr16 | 82812950 | 82813050 | 1072-Lng-A-T | 102  | chr16:82812950-82813050 |
| chr16 | 82945750 | 82945850 | 1223-Lng-B-T | 162  | chr16:82945750-82945850 |
| chr16 | 82962950 | 82963050 | 1072-Lng-A-T | 51   | chr16:82962950-82963050 |
| chr16 | 83009450 | 83009550 | 1090-Lng-B-T | 355  | chr16:83009450-83009550 |
| chr16 | 83131550 | 83131650 | 1065-Lng-A-T | 330  | chr16:83131550-83131650 |
| chr16 | 83342650 | 83342750 | 1065-Lng-B-T | 44   | chr16:83342650-83342750 |
| chr16 | 83542350 | 83542450 | 1065-Lng-A-T | 51   | chr16:83542350-83542450 |
| chr16 | 83646150 | 83646250 | 901-Lng-C-T  | 56   | chr16:83646150-83646250 |
| chr16 | 83820650 | 83820750 | 1004-Lng-A-T | 50   | chr16:83820650-83820750 |
| chr16 | 84074350 | 84074450 | 901-Lng-A-T  | 138  | chr16:84074350-84074450 |
| chr16 | 84099750 | 84099850 | 1152-Lng-A-T | 94   | chr16:84099750-84099850 |
| chr16 | 84118750 | 84118850 | 1223-Lng-C-T | 53   | chr16:84118750-84118850 |
| chr16 | 84140850 | 84140950 | 1274-Lng-A-T | 65   | chr16:84140850-84140950 |
| chr16 | 84299050 | 84299150 | 901-Lng-D-T  | 112  | chr16:84299050-84299150 |
| chr16 | 84408150 | 84408250 | 1004-Lng-A-T | 92   | chr16:84408150-84408250 |
| chr16 | 84609150 | 84609250 | 1223-Lng-B-T | 490  | chr16:84609150-84609250 |
| chr16 | 84667250 | 84667350 | 1100-Lng-A-T | 130  | chr16:84667250-84667350 |
| chr16 | 84857850 | 84857950 | 1151-Lng-A-T | 339  | chr16:84857850-84857950 |
| chr16 | 85000750 | 85000850 | 1100-Lng-A-T | 60   | chr16:85000750-85000850 |
| chr16 | 85042450 | 85042550 | 1223-Lng-D-T | 45   | chr16:85042450-85042550 |
| chr16 | 85049350 | 85049450 | 1151-Lng-A-T | 174  | chr16:85049350-85049450 |
| chr16 | 85068750 | 85068850 | 1065-Lng-A-T | 80   | chr16:85068750-85068850 |
| chr16 | 85096550 | 85096650 | 846-Lng-A-T  | 44   | chr16:85096550-85096650 |
| chr16 | 85102950 | 85103050 | 1223-Lng-B-T | 424  | chr16:85102950-85103050 |
| chr16 | 85103950 | 85104050 | 1072-Lng-A-T | 58   | chr16:85103950-85104050 |
| chr16 | 85126650 | 85126750 | 1223-Lng-B-T | 56   | chr16:85126650-85126750 |
| chr16 | 85132150 | 85132250 | 1274-Lng-A-T | 65   | chr16:85132150-85132250 |
| chr16 | 85162950 | 85163050 | 1065-Lng-B-T | 1795 | chr16:85162950-85163050 |



**Table S2: SB Insertion regions**

|       |          |          |              |      |                         |
|-------|----------|----------|--------------|------|-------------------------|
| chr16 | 85423650 | 85423750 | 901-Lng-A-T  | 67   | chr16:85423650-85423750 |
| chr16 | 85494350 | 85494450 | 1223-Lng-B-T | 46   | chr16:85494350-85494450 |
| chr16 | 85686150 | 85686250 | 901-Lng-A-T  | 67   | chr16:85686150-85686250 |
| chr16 | 85745350 | 85745450 | 1152-Lng-A-T | 52   | chr16:85745350-85745450 |
| chr16 | 86021250 | 86021350 | 1065-Lng-A-T | 98   | chr16:86021250-86021350 |
| chr16 | 86048950 | 86049050 | 1072-Lng-A-T | 64   | chr16:86048950-86049050 |
| chr16 | 86086550 | 86086650 | 1274-Lng-A-T | 57   | chr16:86086550-86086650 |
| chr16 | 86360350 | 86360450 | 1223-Lng-A-T | 144  | chr16:86360350-86360450 |
| chr16 | 86458550 | 86458650 | 1004-Lng-A-T | 60   | chr16:86458550-86458650 |
| chr16 | 86594150 | 86594250 | 1100-Lng-A-T | 115  | chr16:86594150-86594250 |
| chr16 | 86672450 | 86672550 | 1223-Lng-B-T | 46   | chr16:86672450-86672550 |
| chr16 | 86847950 | 86848050 | 901-Lng-B-T  | 128  | chr16:86847950-86848050 |
| chr16 | 87054850 | 87054950 | 1152-Lng-A-T | 102  | chr16:87054850-87054950 |
| chr16 | 87286550 | 87286650 | 1065-Lng-B-T | 40   | chr16:87286550-87286650 |
| chr16 | 87336750 | 87336850 | 1188-Lng-A-T | 118  | chr16:87336750-87336850 |
| chr16 | 87411850 | 87411950 | 1152-Lng-A-T | 40   | chr16:87411850-87411950 |
| chr16 | 87703450 | 87703550 | 1100-Lng-A-T | 135  | chr16:87703450-87703550 |
| chr16 | 87716050 | 87716150 | 1065-Lng-C-T | 3514 | chr16:87716050-87716150 |
| chr16 | 87970750 | 87970850 | 1065-Lng-A-T | 36   | chr16:87970750-87970850 |
| chr16 | 88039850 | 88039950 | 901-Lng-C-T  | 55   | chr16:88039850-88039950 |
| chr16 | 88188250 | 88188350 | 1004-Lng-A-T | 125  | chr16:88188250-88188350 |
| chr16 | 88246250 | 88246350 | 1223-Lng-D-T | 40   | chr16:88246250-88246350 |
| chr16 | 88269450 | 88269550 | 1223-Lng-C-T | 77   | chr16:88269450-88269550 |
| chr16 | 88515250 | 88515350 | 846-Lng-A-T  | 139  | chr16:88515250-88515350 |
| chr16 | 88638050 | 88638150 | 1223-Lng-D-T | 42   | chr16:88638050-88638150 |
| chr16 | 88673450 | 88673550 | 1151-Lng-A-T | 60   | chr16:88673450-88673550 |
| chr16 | 88852550 | 88852650 | 1223-Lng-D-T | 44   | chr16:88852550-88852650 |
| chr16 | 88886150 | 88886250 | 1167-Lng-A-T | 46   | chr16:88886150-88886250 |
| chr16 | 88895250 | 88895350 | 1274-Lng-A-T | 103  | chr16:88895250-88895350 |
| chr16 | 88937550 | 88937650 | 1004-Lng-A-T | 114  | chr16:88937550-88937650 |
| chr16 | 89270350 | 89270450 | 901-Lng-A-T  | 116  | chr16:89270350-89270450 |
| chr16 | 89560750 | 89560850 | 1065-Lng-B-T | 82   | chr16:89560750-89560850 |
| chr16 | 89745250 | 89745350 | 1072-Lng-A-T | 48   | chr16:89745250-89745350 |
| chr16 | 90220250 | 90220350 | 1223-Lng-B-T | 46   | chr16:90220250-90220350 |
| chr16 | 90226150 | 90226250 | 1152-Lng-A-T | 48   | chr16:90226150-90226250 |
| chr16 | 90256250 | 90256350 | 1100-Lng-A-T | 60   | chr16:90256250-90256350 |
| chr16 | 90266450 | 90266550 | 1188-Lng-A-T | 79   | chr16:90266450-90266550 |
| chr16 | 90268950 | 90269050 | 901-Lng-B-T  | 35   | chr16:90268950-90269050 |
| chr16 | 90312750 | 90312850 | 846-Lng-A-T  | 90   | chr16:90312750-90312850 |
| chr16 | 90438250 | 90438350 | 1065-Lng-C-T | 66   | chr16:90438250-90438350 |
| chr16 | 90879650 | 90879750 | 1188-Lng-A-T | 217  | chr16:90879650-90879750 |
| chr16 | 90930550 | 90930650 | 901-Lng-D-T  | 151  | chr16:90930550-90930650 |
| chr16 | 90937950 | 90938050 | 1223-Lng-A-T | 235  | chr16:90937950-90938050 |
| chr16 | 90950050 | 90950150 | 1090-Lng-A-T | 118  | chr16:90950050-90950150 |
| chr16 | 90950950 | 90951050 | 1274-Lng-A-T | 49   | chr16:90950950-90951050 |
| chr16 | 91040850 | 91040950 | 1152-Lng-A-T | 105  | chr16:91040850-91040950 |

**Table S2: SB Insertion regions**

|       |          |          |              |      |                         |
|-------|----------|----------|--------------|------|-------------------------|
| chr16 | 91389650 | 91389750 | 1274-Lng-A-T | 139  | chr16:91389650-91389750 |
| chr16 | 91662050 | 91662150 | 1167-Lng-A-T | 155  | chr16:91662050-91662150 |
| chr16 | 91666050 | 91666150 | 1152-Lng-A-T | 42   | chr16:91666050-91666150 |
| chr16 | 91709150 | 91709250 | 901-Lng-A-T  | 118  | chr16:91709150-91709250 |
| chr16 | 91792050 | 91792150 | 1072-Lng-A-T | 135  | chr16:91792050-91792150 |
| chr16 | 91936950 | 91937050 | 1152-Lng-A-T | 102  | chr16:91936950-91937050 |
| chr16 | 92169250 | 92169350 | 1152-Lng-A-T | 78   | chr16:92169250-92169350 |
| chr16 | 92290750 | 92290850 | 1004-Lng-A-T | 54   | chr16:92290750-92290850 |
| chr16 | 92408950 | 92409050 | 1090-Lng-A-T | 70   | chr16:92408950-92409050 |
| chr16 | 92437050 | 92437150 | 901-Lng-A-T  | 72   | chr16:92437050-92437150 |
| chr16 | 92454550 | 92454650 | 1065-Lng-A-T | 38   | chr16:92454550-92454650 |
| chr16 | 92462950 | 92463050 | 1004-Lng-A-T | 83   | chr16:92462950-92463050 |
| chr16 | 92541350 | 92541450 | 901-Lng-A-T  | 295  | chr16:92541350-92541450 |
| chr16 | 92648550 | 92648650 | 1065-Lng-B-T | 56   | chr16:92648550-92648650 |
| chr16 | 92656850 | 92656950 | 846-Lng-A-T  | 85   | chr16:92656850-92656950 |
| chr16 | 92947950 | 92948050 | 901-Lng-B-T  | 101  | chr16:92947950-92948050 |
| chr16 | 93023850 | 93023950 | 1100-Lng-A-T | 63   | chr16:93023850-93023950 |
| chr16 | 93111150 | 93111250 | 1065-Lng-C-T | 2027 | chr16:93111150-93111250 |
| chr16 | 93295850 | 93295950 | 1065-Lng-A-T | 83   | chr16:93295850-93295950 |
| chr16 | 93403650 | 93403750 | 1100-Lng-A-T | 86   | chr16:93403650-93403750 |
| chr16 | 93483950 | 93484050 | 901-Lng-A-T  | 101  | chr16:93483950-93484050 |
| chr16 | 93624850 | 93624950 | 1274-Lng-A-T | 172  | chr16:93624850-93624950 |
| chr16 | 93756650 | 93756750 | 1065-Lng-C-T | 63   | chr16:93756650-93756750 |
| chr16 | 93771350 | 93771450 | 1274-Lng-A-T | 149  | chr16:93771350-93771450 |
| chr16 | 93841050 | 93841150 | 901-Lng-C-T  | 41   | chr16:93841050-93841150 |
| chr16 | 93873250 | 93873350 | 1274-Lng-A-T | 80   | chr16:93873250-93873350 |
| chr16 | 93875850 | 93875950 | 1274-Lng-A-T | 66   | chr16:93875850-93875950 |
| chr16 | 94053450 | 94053550 | 1100-Lng-B-T | 64   | chr16:94053450-94053550 |
| chr16 | 94106050 | 94106150 | 901-Lng-A-T  | 152  | chr16:94106050-94106150 |
| chr16 | 94568550 | 94568650 | 1072-Lng-A-T | 60   | chr16:94568550-94568650 |
| chr16 | 94590450 | 94590550 | 1004-Lng-A-T | 66   | chr16:94590450-94590550 |
| chr16 | 94603150 | 94603250 | 1090-Lng-B-T | 465  | chr16:94603150-94603250 |
| chr16 | 94633150 | 94633250 | 1274-Lng-A-T | 73   | chr16:94633150-94633250 |
| chr16 | 94633250 | 94633350 | 1274-Lng-A-T | 145  | chr16:94633250-94633350 |
| chr16 | 94676750 | 94676850 | 1090-Lng-A-T | 74   | chr16:94676750-94676850 |
| chr16 | 94738050 | 94738150 | 1100-Lng-A-T | 196  | chr16:94738050-94738150 |
| chr16 | 94738650 | 94738750 | 1223-Lng-A-T | 209  | chr16:94738650-94738750 |
| chr16 | 94839850 | 94839950 | 1223-Lng-A-T | 97   | chr16:94839850-94839950 |
| chr16 | 94861450 | 94861550 | 1090-Lng-A-T | 73   | chr16:94861450-94861550 |
| chr16 | 94875750 | 94875850 | 901-Lng-B-T  | 104  | chr16:94875750-94875850 |
| chr16 | 94879050 | 94879150 | 901-Lng-A-T  | 87   | chr16:94879050-94879150 |
| chr16 | 94887950 | 94888050 | 1100-Lng-A-T | 66   | chr16:94887950-94888050 |
| chr16 | 94901750 | 94901850 | 1090-Lng-B-T | 229  | chr16:94901750-94901850 |
| chr16 | 95115850 | 95115950 | 1004-Lng-A-T | 199  | chr16:95115850-95115950 |
| chr16 | 95260150 | 95260250 | 901-Lng-A-T  | 105  | chr16:95260150-95260250 |
| chr16 | 95263350 | 95263450 | 1274-Lng-A-T | 70   | chr16:95263350-95263450 |

**Table S2: SB Insertion regions**

|       |          |          |              |      |                         |
|-------|----------|----------|--------------|------|-------------------------|
| chr16 | 95472550 | 95472650 | 1274-Lng-A-T | 53   | chr16:95472550-95472650 |
| chr16 | 95494050 | 95494150 | 846-Lng-A-T  | 1724 | chr16:95494050-95494150 |
| chr16 | 95496250 | 95496350 | 1152-Lng-A-T | 38   | chr16:95496250-95496350 |
| chr16 | 95501550 | 95501650 | 1223-Lng-B-T | 132  | chr16:95501550-95501650 |
| chr16 | 95684950 | 95685050 | 901-Lng-C-T  | 94   | chr16:95684950-95685050 |
| chr16 | 95726550 | 95726650 | 1072-Lng-A-T | 57   | chr16:95726550-95726650 |
| chr16 | 96056650 | 96056750 | 1152-Lng-A-T | 48   | chr16:96056650-96056750 |
| chr16 | 96126650 | 96126750 | 1152-Lng-A-T | 67   | chr16:96126650-96126750 |
| chr16 | 96258850 | 96258950 | 901-Lng-C-T  | 104  | chr16:96258850-96258950 |
| chr16 | 96277150 | 96277250 | 901-Lng-C-T  | 172  | chr16:96277150-96277250 |
| chr16 | 96280350 | 96280450 | 1223-Lng-C-T | 53   | chr16:96280350-96280450 |
| chr16 | 96289650 | 96289750 | 1151-Lng-A-T | 54   | chr16:96289650-96289750 |
| chr16 | 96292750 | 96292850 | 1004-Lng-A-T | 64   | chr16:96292750-96292850 |
| chr16 | 96297650 | 96297750 | 1004-Lng-A-T | 1501 | chr16:96297650-96297750 |
| chr16 | 96421050 | 96421150 | 1072-Lng-A-T | 114  | chr16:96421050-96421150 |
| chr16 | 96438050 | 96438150 | 901-Lng-B-T  | 139  | chr16:96438050-96438150 |
| chr16 | 96438150 | 96438250 | 1065-Lng-B-T | 81   | chr16:96438150-96438250 |
| chr16 | 96592150 | 96592250 | 901-Lng-A-T  | 103  | chr16:96592150-96592250 |
| chr16 | 97343950 | 97344050 | 1152-Lng-A-T | 83   | chr16:97343950-97344050 |
| chr16 | 97375150 | 97375250 | 1223-Lng-B-T | 57   | chr16:97375150-97375250 |
| chr16 | 97499350 | 97499450 | 901-Lng-D-T  | 147  | chr16:97499350-97499450 |
| chr16 | 97772650 | 97772750 | 1151-Lng-A-T | 65   | chr16:97772650-97772750 |
| chr16 | 98032750 | 98032850 | 1065-Lng-A-T | 50   | chr16:98032750-98032850 |
| chr16 | 98043750 | 98043850 | 1065-Lng-B-T | 73   | chr16:98043750-98043850 |
| chr16 | 98099150 | 98099250 | 1004-Lng-A-T | 100  | chr16:98099150-98099250 |
| chr16 | 98119050 | 98119150 | 901-Lng-D-T  | 36   | chr16:98119050-98119150 |
| chr16 | 98123450 | 98123550 | 901-Lng-A-T  | 96   | chr16:98123450-98123550 |
| chr16 | 98223850 | 98223950 | 901-Lng-B-T  | 45   | chr16:98223850-98223950 |
| chr17 | 3126550  | 3126650  | 1065-Lng-A-T | 36   | chr17:3126550-3126650   |
| chr17 | 3146050  | 3146150  | 901-Lng-A-T  | 133  | chr17:3146050-3146150   |
| chr17 | 3147650  | 3147750  | 1004-Lng-A-T | 225  | chr17:3147650-3147750   |
| chr17 | 3148550  | 3148650  | 1100-Lng-A-T | 52   | chr17:3148550-3148650   |
| chr17 | 3153850  | 3153950  | 1090-Lng-A-T | 72   | chr17:3153850-3153950   |
| chr17 | 3162150  | 3162250  | 1223-Lng-D-T | 169  | chr17:3162150-3162250   |
| chr17 | 3192550  | 3192650  | 1152-Lng-A-T | 51   | chr17:3192550-3192650   |
| chr17 | 3207250  | 3207350  | 1065-Lng-A-T | 41   | chr17:3207250-3207350   |
| chr17 | 3214850  | 3214950  | 1223-Lng-C-T | 43   | chr17:3214850-3214950   |
| chr17 | 3216650  | 3216750  | 1151-Lng-A-T | 54   | chr17:3216650-3216750   |
| chr17 | 3222550  | 3222650  | 1167-Lng-A-T | 76   | chr17:3222550-3222650   |
| chr17 | 3236850  | 3236950  | 901-Lng-A-T  | 493  | chr17:3236850-3236950   |
| chr17 | 3247750  | 3247850  | 901-Lng-B-T  | 238  | chr17:3247750-3247850   |
| chr17 | 3362950  | 3363050  | 901-Lng-A-T  | 100  | chr17:3362950-3363050   |
| chr17 | 3366350  | 3366450  | 846-Lng-A-T  | 76   | chr17:3366350-3366450   |
| chr17 | 3388950  | 3389050  | 901-Lng-B-T  | 98   | chr17:3388950-3389050   |
| chr17 | 3624550  | 3624650  | 1152-Lng-A-T | 99   | chr17:3624550-3624650   |
| chr17 | 3887350  | 3887450  | 1065-Lng-A-T | 61   | chr17:3887350-3887450   |

**Table S2: SB Insertion regions**

|       |         |         |              |     |                       |
|-------|---------|---------|--------------|-----|-----------------------|
| chr17 | 3895250 | 3895350 | 901-Lng-A-T  | 126 | chr17:3895250-3895350 |
| chr17 | 4585850 | 4585950 | 901-Lng-B-T  | 190 | chr17:4585850-4585950 |
| chr17 | 4690050 | 4690150 | 1223-Lng-B-T | 48  | chr17:4690050-4690150 |
| chr17 | 4698850 | 4698950 | 1100-Lng-B-T | 84  | chr17:4698850-4698950 |
| chr17 | 4703850 | 4703950 | 1065-Lng-B-T | 87  | chr17:4703850-4703950 |
| chr17 | 4709650 | 4709750 | 1274-Lng-A-T | 57  | chr17:4709650-4709750 |
| chr17 | 4721850 | 4721950 | 1065-Lng-B-T | 49  | chr17:4721850-4721950 |
| chr17 | 4726150 | 4726250 | 1065-Lng-B-T | 93  | chr17:4726150-4726250 |
| chr17 | 4928450 | 4928550 | 901-Lng-A-T  | 507 | chr17:4928450-4928550 |
| chr17 | 4948150 | 4948250 | 1223-Lng-A-T | 156 | chr17:4948150-4948250 |
| chr17 | 5010750 | 5010850 | 1100-Lng-A-T | 136 | chr17:5010750-5010850 |
| chr17 | 5061750 | 5061850 | 1274-Lng-A-T | 50  | chr17:5061750-5061850 |
| chr17 | 5065750 | 5065850 | 901-Lng-A-T  | 119 | chr17:5065750-5065850 |
| chr17 | 5077650 | 5077750 | 1072-Lng-A-T | 57  | chr17:5077650-5077750 |
| chr17 | 5080350 | 5080450 | 1100-Lng-A-T | 99  | chr17:5080350-5080450 |
| chr17 | 5109350 | 5109450 | 1152-Lng-A-T | 102 | chr17:5109350-5109450 |
| chr17 | 5118450 | 5118550 | 1188-Lng-A-T | 36  | chr17:5118450-5118550 |
| chr17 | 5123850 | 5123950 | 1100-Lng-A-T | 68  | chr17:5123850-5123950 |
| chr17 | 5157350 | 5157450 | 1065-Lng-C-T | 61  | chr17:5157350-5157450 |
| chr17 | 5182850 | 5182950 | 1151-Lng-A-T | 117 | chr17:5182850-5182950 |
| chr17 | 5206950 | 5207050 | 1151-Lng-A-T | 56  | chr17:5206950-5207050 |
| chr17 | 5265950 | 5266050 | 1100-Lng-A-T | 55  | chr17:5265950-5266050 |
| chr17 | 5281650 | 5281750 | 1274-Lng-A-T | 144 | chr17:5281650-5281750 |
| chr17 | 5282750 | 5282850 | 1223-Lng-D-T | 59  | chr17:5282750-5282850 |
| chr17 | 5286050 | 5286150 | 1274-Lng-A-T | 348 | chr17:5286050-5286150 |
| chr17 | 5322250 | 5322350 | 1223-Lng-D-T | 40  | chr17:5322250-5322350 |
| chr17 | 5844150 | 5844250 | 1188-Lng-A-T | 41  | chr17:5844150-5844250 |
| chr17 | 5846550 | 5846650 | 1004-Lng-A-T | 487 | chr17:5846550-5846650 |
| chr17 | 5850750 | 5850850 | 1274-Lng-A-T | 98  | chr17:5850750-5850850 |
| chr17 | 5942050 | 5942150 | 1188-Lng-A-T | 133 | chr17:5942050-5942150 |
| chr17 | 5944650 | 5944750 | 1004-Lng-A-T | 73  | chr17:5944650-5944750 |
| chr17 | 5961950 | 5962050 | 1188-Lng-A-T | 34  | chr17:5961950-5962050 |
| chr17 | 6041650 | 6041750 | 1152-Lng-A-T | 85  | chr17:6041650-6041750 |
| chr17 | 6046150 | 6046250 | 1223-Lng-D-T | 67  | chr17:6046150-6046250 |
| chr17 | 6053850 | 6053950 | 1274-Lng-A-T | 59  | chr17:6053850-6053950 |
| chr17 | 6154750 | 6154850 | 1065-Lng-B-T | 50  | chr17:6154750-6154850 |
| chr17 | 7015750 | 7015850 | 1223-Lng-B-T | 37  | chr17:7015750-7015850 |
| chr17 | 7252250 | 7252350 | 1223-Lng-A-T | 86  | chr17:7252250-7252350 |
| chr17 | 7407350 | 7407450 | 1152-Lng-A-T | 89  | chr17:7407350-7407450 |
| chr17 | 7444050 | 7444150 | 1151-Lng-A-T | 64  | chr17:7444050-7444150 |
| chr17 | 7729450 | 7729550 | 1167-Lng-A-T | 45  | chr17:7729450-7729550 |
| chr17 | 8364750 | 8364850 | 1100-Lng-A-T | 87  | chr17:8364750-8364850 |
| chr17 | 8397450 | 8397550 | 1072-Lng-A-T | 106 | chr17:8397450-8397550 |
| chr17 | 8419950 | 8420050 | 1065-Lng-A-T | 37  | chr17:8419950-8420050 |
| chr17 | 8514950 | 8515050 | 1065-Lng-A-T | 50  | chr17:8514950-8515050 |
| chr17 | 8741050 | 8741150 | 901-Lng-C-T  | 77  | chr17:8741050-8741150 |

**Table S2: SB Insertion regions**

|       |          |          |              |     |                         |
|-------|----------|----------|--------------|-----|-------------------------|
| chr17 | 8857050  | 8857150  | 1151-Lng-A-T | 99  | chr17:8857050-8857150   |
| chr17 | 8892550  | 8892650  | 1065-Lng-A-T | 74  | chr17:8892550-8892650   |
| chr17 | 9009350  | 9009450  | 901-Lng-A-T  | 57  | chr17:9009350-9009450   |
| chr17 | 9415350  | 9415450  | 1100-Lng-A-T | 86  | chr17:9415350-9415450   |
| chr17 | 9422350  | 9422450  | 901-Lng-B-T  | 64  | chr17:9422350-9422450   |
| chr17 | 9678550  | 9678650  | 1004-Lng-A-T | 79  | chr17:9678550-9678650   |
| chr17 | 9928250  | 9928350  | 1090-Lng-A-T | 70  | chr17:9928250-9928350   |
| chr17 | 9959850  | 9959950  | 1065-Lng-C-T | 633 | chr17:9959850-9959950   |
| chr17 | 9988850  | 9988950  | 1065-Lng-A-T | 64  | chr17:9988850-9988950   |
| chr17 | 10179650 | 10179750 | 1072-Lng-A-T | 117 | chr17:10179650-10179750 |
| chr17 | 10197150 | 10197250 | 901-Lng-C-T  | 106 | chr17:10197150-10197250 |
| chr17 | 10376150 | 10376250 | 901-Lng-C-T  | 82  | chr17:10376150-10376250 |
| chr17 | 10391350 | 10391450 | 1274-Lng-A-T | 66  | chr17:10391350-10391450 |
| chr17 | 10434050 | 10434150 | 1167-Lng-A-T | 47  | chr17:10434050-10434150 |
| chr17 | 10437850 | 10437950 | 1223-Lng-A-T | 186 | chr17:10437850-10437950 |
| chr17 | 10466950 | 10467050 | 1100-Lng-A-T | 122 | chr17:10466950-10467050 |
| chr17 | 10468950 | 10469050 | 1167-Lng-A-T | 92  | chr17:10468950-10469050 |
| chr17 | 10483750 | 10483850 | 1100-Lng-A-T | 129 | chr17:10483750-10483850 |
| chr17 | 10487050 | 10487150 | 1090-Lng-B-T | 164 | chr17:10487050-10487150 |
| chr17 | 10487850 | 10487950 | 1152-Lng-A-T | 75  | chr17:10487850-10487950 |
| chr17 | 10505150 | 10505250 | 1100-Lng-A-T | 105 | chr17:10505150-10505250 |
| chr17 | 10695950 | 10696050 | 901-Lng-D-T  | 308 | chr17:10695950-10696050 |
| chr17 | 10886650 | 10886750 | 1274-Lng-A-T | 67  | chr17:10886650-10886750 |
| chr17 | 10915650 | 10915750 | 1065-Lng-B-T | 79  | chr17:10915650-10915750 |
| chr17 | 10980750 | 10980850 | 1274-Lng-A-T | 61  | chr17:10980750-10980850 |
| chr17 | 11100450 | 11100550 | 846-Lng-A-T  | 224 | chr17:11100450-11100550 |
| chr17 | 11170050 | 11170150 | 1065-Lng-A-T | 62  | chr17:11170050-11170150 |
| chr17 | 11230850 | 11230950 | 846-Lng-A-T  | 86  | chr17:11230850-11230950 |
| chr17 | 11361750 | 11361850 | 901-Lng-D-T  | 54  | chr17:11361750-11361850 |
| chr17 | 11502450 | 11502550 | 1072-Lng-A-T | 51  | chr17:11502450-11502550 |
| chr17 | 11542850 | 11542950 | 1065-Lng-B-T | 47  | chr17:11542850-11542950 |
| chr17 | 11606050 | 11606150 | 1072-Lng-A-T | 223 | chr17:11606050-11606150 |
| chr17 | 11659950 | 11660050 | 1223-Lng-B-T | 34  | chr17:11659950-11660050 |
| chr17 | 11798050 | 11798150 | 1072-Lng-A-T | 56  | chr17:11798050-11798150 |
| chr17 | 11864950 | 11865050 | 846-Lng-A-T  | 93  | chr17:11864950-11865050 |
| chr17 | 11911250 | 11911350 | 1004-Lng-A-T | 404 | chr17:11911250-11911350 |
| chr17 | 12186250 | 12186350 | 1065-Lng-C-T | 75  | chr17:12186250-12186350 |
| chr17 | 12226250 | 12226350 | 1151-Lng-A-T | 54  | chr17:12226250-12226350 |
| chr17 | 12337650 | 12337750 | 1223-Lng-B-T | 60  | chr17:12337650-12337750 |
| chr17 | 12338550 | 12338650 | 846-Lng-A-T  | 175 | chr17:12338550-12338650 |
| chr17 | 12539050 | 12539150 | 1151-Lng-A-T | 89  | chr17:12539050-12539150 |
| chr17 | 12593150 | 12593250 | 1072-Lng-A-T | 55  | chr17:12593150-12593250 |
| chr17 | 12816550 | 12816650 | 1274-Lng-A-T | 345 | chr17:12816550-12816650 |
| chr17 | 12889850 | 12889950 | 846-Lng-A-T  | 186 | chr17:12889850-12889950 |
| chr17 | 12917850 | 12917950 | 1223-Lng-B-T | 44  | chr17:12917850-12917950 |
| chr17 | 12953850 | 12953950 | 901-Lng-A-T  | 52  | chr17:12953850-12953950 |

**Table S2: SB Insertion regions**

|       |          |          |              |      |                         |
|-------|----------|----------|--------------|------|-------------------------|
| chr17 | 12963750 | 12963850 | 1223-Lng-A-T | 100  | chr17:12963750-12963850 |
| chr17 | 13075250 | 13075350 | 901-Lng-D-T  | 209  | chr17:13075250-13075350 |
| chr17 | 13136950 | 13137050 | 1072-Lng-A-T | 257  | chr17:13136950-13137050 |
| chr17 | 13142050 | 13142150 | 901-Lng-B-T  | 158  | chr17:13142050-13142150 |
| chr17 | 13171950 | 13172050 | 1188-Lng-A-T | 116  | chr17:13171950-13172050 |
| chr17 | 13565650 | 13565750 | 1065-Lng-B-T | 53   | chr17:13565650-13565750 |
| chr17 | 13746250 | 13746350 | 1100-Lng-A-T | 1053 | chr17:13746250-13746350 |
| chr17 | 13896050 | 13896150 | 1274-Lng-A-T | 54   | chr17:13896050-13896150 |
| chr17 | 13950650 | 13950750 | 1223-Lng-B-T | 39   | chr17:13950650-13950750 |
| chr17 | 13962250 | 13962350 | 1151-Lng-A-T | 225  | chr17:13962250-13962350 |
| chr17 | 13969250 | 13969350 | 901-Lng-D-T  | 157  | chr17:13969250-13969350 |
| chr17 | 14020350 | 14020450 | 1100-Lng-A-T | 164  | chr17:14020350-14020450 |
| chr17 | 14375850 | 14375950 | 901-Lng-C-T  | 39   | chr17:14375850-14375950 |
| chr17 | 14604150 | 14604250 | 1065-Lng-C-T | 114  | chr17:14604150-14604250 |
| chr17 | 14926850 | 14926950 | 1152-Lng-A-T | 197  | chr17:14926850-14926950 |
| chr17 | 15061050 | 15061150 | 1223-Lng-A-T | 179  | chr17:15061050-15061150 |
| chr17 | 15201450 | 15201550 | 1065-Lng-C-T | 135  | chr17:15201450-15201550 |
| chr17 | 15487250 | 15487350 | 1100-Lng-B-T | 72   | chr17:15487250-15487350 |
| chr17 | 15538450 | 15538550 | 1223-Lng-A-T | 1900 | chr17:15538450-15538550 |
| chr17 | 15572650 | 15572750 | 1065-Lng-A-T | 50   | chr17:15572650-15572750 |
| chr17 | 15601950 | 15602050 | 1223-Lng-B-T | 42   | chr17:15601950-15602050 |
| chr17 | 15614850 | 15614950 | 1223-Lng-C-T | 46   | chr17:15614850-15614950 |
| chr17 | 15861550 | 15861650 | 1223-Lng-C-T | 79   | chr17:15861550-15861650 |
| chr17 | 15869850 | 15869950 | 1152-Lng-A-T | 95   | chr17:15869850-15869950 |
| chr17 | 15872450 | 15872550 | 1167-Lng-A-T | 61   | chr17:15872450-15872550 |
| chr17 | 15872850 | 15872950 | 1151-Lng-A-T | 189  | chr17:15872850-15872950 |
| chr17 | 15883350 | 15883450 | 1090-Lng-A-T | 48   | chr17:15883350-15883450 |
| chr17 | 15906250 | 15906350 | 1223-Lng-B-T | 39   | chr17:15906250-15906350 |
| chr17 | 15909950 | 15910050 | 1223-Lng-D-T | 95   | chr17:15909950-15910050 |
| chr17 | 15910150 | 15910250 | 1065-Lng-A-T | 61   | chr17:15910150-15910250 |
| chr17 | 16138450 | 16138550 | 1188-Lng-A-T | 177  | chr17:16138450-16138550 |
| chr17 | 16584350 | 16584450 | 1223-Lng-A-T | 71   | chr17:16584350-16584450 |
| chr17 | 16723550 | 16723650 | 846-Lng-A-T  | 58   | chr17:16723550-16723650 |
| chr17 | 16960050 | 16960150 | 1223-Lng-A-T | 1403 | chr17:16960050-16960150 |
| chr17 | 17146450 | 17146550 | 1090-Lng-B-T | 1117 | chr17:17146450-17146550 |
| chr17 | 17176650 | 17176750 | 1090-Lng-A-T | 55   | chr17:17176650-17176750 |
| chr17 | 17320350 | 17320450 | 1100-Lng-A-T | 53   | chr17:17320350-17320450 |
| chr17 | 17343550 | 17343650 | 1090-Lng-A-T | 64   | chr17:17343550-17343650 |
| chr17 | 17439950 | 17440050 | 1072-Lng-A-T | 56   | chr17:17439950-17440050 |
| chr17 | 17454050 | 17454150 | 1100-Lng-A-T | 67   | chr17:17454050-17454150 |
| chr17 | 17681150 | 17681250 | 1152-Lng-A-T | 72   | chr17:17681150-17681250 |
| chr17 | 17797250 | 17797350 | 846-Lng-A-T  | 62   | chr17:17797250-17797350 |
| chr17 | 17978550 | 17978650 | 1223-Lng-C-T | 45   | chr17:17978550-17978650 |
| chr17 | 18143850 | 18143950 | 1152-Lng-A-T | 252  | chr17:18143850-18143950 |
| chr17 | 18206150 | 18206250 | 1072-Lng-A-T | 84   | chr17:18206150-18206250 |
| chr17 | 18713550 | 18713650 | 1065-Lng-A-T | 62   | chr17:18713550-18713650 |

**Table S2: SB Insertion regions**

|       |          |          |              |     |                         |
|-------|----------|----------|--------------|-----|-------------------------|
| chr17 | 18716550 | 18716650 | 1065-Lng-B-T | 59  | chr17:18716550-18716650 |
| chr17 | 18719750 | 18719850 | 1065-Lng-B-T | 76  | chr17:18719750-18719850 |
| chr17 | 18779850 | 18779950 | 846-Lng-A-T  | 74  | chr17:18779850-18779950 |
| chr17 | 18787950 | 18788050 | 1223-Lng-B-T | 55  | chr17:18787950-18788050 |
| chr17 | 19219150 | 19219250 | 1065-Lng-A-T | 65  | chr17:19219150-19219250 |
| chr17 | 19219550 | 19219650 | 901-Lng-B-T  | 178 | chr17:19219550-19219650 |
| chr17 | 19228450 | 19228550 | 846-Lng-A-T  | 114 | chr17:19228450-19228550 |
| chr17 | 19249850 | 19249950 | 1223-Lng-B-T | 40  | chr17:19249850-19249950 |
| chr17 | 19276750 | 19276850 | 1004-Lng-A-T | 90  | chr17:19276750-19276850 |
| chr17 | 19317150 | 19317250 | 901-Lng-D-T  | 252 | chr17:19317150-19317250 |
| chr17 | 19347050 | 19347150 | 1004-Lng-A-T | 50  | chr17:19347050-19347150 |
| chr17 | 19939950 | 19940050 | 1152-Lng-A-T | 99  | chr17:19939950-19940050 |
| chr17 | 20094050 | 20094150 | 1188-Lng-A-T | 34  | chr17:20094050-20094150 |
| chr17 | 20137750 | 20137850 | 1072-Lng-A-T | 145 | chr17:20137750-20137850 |
| chr17 | 20182850 | 20182950 | 901-Lng-A-T  | 157 | chr17:20182850-20182950 |
| chr17 | 20301350 | 20301450 | 1152-Lng-A-T | 50  | chr17:20301350-20301450 |
| chr17 | 20366550 | 20366650 | 1090-Lng-B-T | 114 | chr17:20366550-20366650 |
| chr17 | 20451650 | 20451750 | 1223-Lng-B-T | 129 | chr17:20451650-20451750 |
| chr17 | 20508650 | 20508750 | 901-Lng-D-T  | 67  | chr17:20508650-20508750 |
| chr17 | 20892450 | 20892550 | 1223-Lng-B-T | 67  | chr17:20892450-20892550 |
| chr17 | 21070250 | 21070350 | 1223-Lng-A-T | 117 | chr17:21070250-21070350 |
| chr17 | 21159550 | 21159650 | 1065-Lng-A-T | 38  | chr17:21159550-21159650 |
| chr17 | 21504050 | 21504150 | 1065-Lng-A-T | 48  | chr17:21504050-21504150 |
| chr17 | 21564050 | 21564150 | 1100-Lng-B-T | 70  | chr17:21564050-21564150 |
| chr17 | 21641450 | 21641550 | 901-Lng-B-T  | 271 | chr17:21641450-21641550 |
| chr17 | 21710050 | 21710150 | 846-Lng-A-T  | 452 | chr17:21710050-21710150 |
| chr17 | 21734050 | 21734150 | 1065-Lng-C-T | 99  | chr17:21734050-21734150 |
| chr17 | 21861450 | 21861550 | 1167-Lng-A-T | 84  | chr17:21861450-21861550 |
| chr17 | 21905050 | 21905150 | 1065-Lng-B-T | 52  | chr17:21905050-21905150 |
| chr17 | 21979750 | 21979850 | 901-Lng-B-T  | 195 | chr17:21979750-21979850 |
| chr17 | 22023850 | 22023950 | 1167-Lng-A-T | 102 | chr17:22023850-22023950 |
| chr17 | 22076550 | 22076650 | 1223-Lng-A-T | 83  | chr17:22076550-22076650 |
| chr17 | 22120650 | 22120750 | 901-Lng-D-T  | 254 | chr17:22120650-22120750 |
| chr17 | 22336150 | 22336250 | 1223-Lng-A-T | 100 | chr17:22336150-22336250 |
| chr17 | 22498950 | 22499050 | 846-Lng-A-T  | 145 | chr17:22498950-22499050 |
| chr17 | 22510850 | 22510950 | 1065-Lng-A-T | 85  | chr17:22510850-22510950 |
| chr17 | 22547950 | 22548050 | 1004-Lng-A-T | 87  | chr17:22547950-22548050 |
| chr17 | 22580550 | 22580650 | 901-Lng-A-T  | 58  | chr17:22580550-22580650 |
| chr17 | 22586450 | 22586550 | 1065-Lng-C-T | 82  | chr17:22586450-22586550 |
| chr17 | 22642250 | 22642350 | 901-Lng-A-T  | 153 | chr17:22642250-22642350 |
| chr17 | 22704550 | 22704650 | 1151-Lng-A-T | 374 | chr17:22704550-22704650 |
| chr17 | 22867050 | 22867150 | 901-Lng-D-T  | 368 | chr17:22867050-22867150 |
| chr17 | 23052250 | 23052350 | 1152-Lng-A-T | 44  | chr17:23052250-23052350 |
| chr17 | 23098750 | 23098850 | 1100-Lng-A-T | 59  | chr17:23098750-23098850 |
| chr17 | 23316650 | 23316750 | 1065-Lng-C-T | 85  | chr17:23316650-23316750 |
| chr17 | 23368550 | 23368650 | 1065-Lng-A-T | 68  | chr17:23368550-23368650 |

**Table S2: SB Insertion regions**

|       |          |          |              |      |                         |
|-------|----------|----------|--------------|------|-------------------------|
| chr17 | 23648850 | 23648950 | 1065-Lng-B-T | 52   | chr17:23648850-23648950 |
| chr17 | 23951150 | 23951250 | 1100-Lng-A-T | 55   | chr17:23951150-23951250 |
| chr17 | 23965250 | 23965350 | 1223-Lng-C-T | 1113 | chr17:23965250-23965350 |
| chr17 | 24211950 | 24212050 | 1100-Lng-A-T | 55   | chr17:24211950-24212050 |
| chr17 | 24218450 | 24218550 | 1151-Lng-A-T | 146  | chr17:24218450-24218550 |
| chr17 | 24227250 | 24227350 | 1223-Lng-A-T | 141  | chr17:24227250-24227350 |
| chr17 | 24265150 | 24265250 | 1152-Lng-A-T | 64   | chr17:24265150-24265250 |
| chr17 | 24275550 | 24275650 | 1065-Lng-A-T | 34   | chr17:24275550-24275650 |
| chr17 | 24337750 | 24337850 | 901-Lng-A-T  | 59   | chr17:24337750-24337850 |
| chr17 | 24574150 | 24574250 | 1188-Lng-A-T | 54   | chr17:24574150-24574250 |
| chr17 | 24693550 | 24693650 | 901-Lng-C-T  | 106  | chr17:24693550-24693650 |
| chr17 | 24700950 | 24701050 | 1274-Lng-A-T | 81   | chr17:24700950-24701050 |
| chr17 | 24788650 | 24788750 | 1188-Lng-A-T | 131  | chr17:24788650-24788750 |
| chr17 | 24814150 | 24814250 | 901-Lng-A-T  | 75   | chr17:24814150-24814250 |
| chr17 | 24988350 | 24988450 | 1167-Lng-A-T | 133  | chr17:24988350-24988450 |
| chr17 | 25001650 | 25001750 | 1151-Lng-A-T | 164  | chr17:25001650-25001750 |
| chr17 | 25090050 | 25090150 | 1188-Lng-A-T | 40   | chr17:25090050-25090150 |
| chr17 | 25146650 | 25146750 | 901-Lng-D-T  | 47   | chr17:25146650-25146750 |
| chr17 | 25202550 | 25202650 | 1065-Lng-B-T | 51   | chr17:25202550-25202650 |
| chr17 | 25316050 | 25316150 | 1100-Lng-A-T | 131  | chr17:25316050-25316150 |
| chr17 | 25317950 | 25318050 | 1151-Lng-A-T | 348  | chr17:25317950-25318050 |
| chr17 | 25402650 | 25402750 | 1100-Lng-A-T | 121  | chr17:25402650-25402750 |
| chr17 | 25566150 | 25566250 | 1100-Lng-A-T | 73   | chr17:25566150-25566250 |
| chr17 | 26045050 | 26045150 | 1188-Lng-A-T | 743  | chr17:26045050-26045150 |
| chr17 | 26068250 | 26068350 | 1151-Lng-A-T | 444  | chr17:26068250-26068350 |
| chr17 | 26113450 | 26113550 | 1100-Lng-A-T | 73   | chr17:26113450-26113550 |
| chr17 | 26121550 | 26121650 | 1274-Lng-A-T | 72   | chr17:26121550-26121650 |
| chr17 | 26187250 | 26187350 | 846-Lng-A-T  | 48   | chr17:26187250-26187350 |
| chr17 | 26190050 | 26190150 | 1065-Lng-A-T | 372  | chr17:26190050-26190150 |
| chr17 | 26284350 | 26284450 | 1223-Lng-B-T | 35   | chr17:26284350-26284450 |
| chr17 | 26289550 | 26289650 | 1100-Lng-A-T | 88   | chr17:26289550-26289650 |
| chr17 | 26376750 | 26376850 | 1274-Lng-A-T | 58   | chr17:26376750-26376850 |
| chr17 | 26691150 | 26691250 | 1072-Lng-A-T | 76   | chr17:26691150-26691250 |
| chr17 | 26857950 | 26858050 | 1065-Lng-C-T | 62   | chr17:26857950-26858050 |
| chr17 | 26873450 | 26873550 | 1072-Lng-A-T | 128  | chr17:26873450-26873550 |
| chr17 | 26893750 | 26893850 | 1223-Lng-A-T | 82   | chr17:26893750-26893850 |
| chr17 | 26898750 | 26898850 | 1274-Lng-A-T | 60   | chr17:26898750-26898850 |
| chr17 | 27335050 | 27335150 | 1100-Lng-A-T | 64   | chr17:27335050-27335150 |
| chr17 | 28093150 | 28093250 | 1100-Lng-A-T | 58   | chr17:28093150-28093250 |
| chr17 | 28126450 | 28126550 | 1274-Lng-A-T | 79   | chr17:28126450-28126550 |
| chr17 | 28186950 | 28187050 | 1004-Lng-A-T | 53   | chr17:28186950-28187050 |
| chr17 | 28455650 | 28455750 | 1274-Lng-A-T | 204  | chr17:28455650-28455750 |
| chr17 | 28645450 | 28645550 | 1151-Lng-A-T | 94   | chr17:28645450-28645550 |
| chr17 | 28750950 | 28751050 | 1004-Lng-A-T | 169  | chr17:28750950-28751050 |
| chr17 | 28941150 | 28941250 | 1152-Lng-A-T | 111  | chr17:28941150-28941250 |
| chr17 | 29048250 | 29048350 | 901-Lng-A-T  | 119  | chr17:29048250-29048350 |



**Table S2: SB Insertion regions**

|       |          |          |              |     |                         |
|-------|----------|----------|--------------|-----|-------------------------|
| chr17 | 29091250 | 29091350 | 901-Lng-C-T  | 28  | chr17:29091250-29091350 |
| chr17 | 29112650 | 29112750 | 901-Lng-A-T  | 91  | chr17:29112650-29112750 |
| chr17 | 29168250 | 29168350 | 1274-Lng-A-T | 143 | chr17:29168250-29168350 |
| chr17 | 29188650 | 29188750 | 1223-Lng-B-T | 163 | chr17:29188650-29188750 |
| chr17 | 29616750 | 29616850 | 1223-Lng-B-T | 55  | chr17:29616750-29616850 |
| chr17 | 30119150 | 30119250 | 1004-Lng-A-T | 91  | chr17:30119150-30119250 |
| chr17 | 30152850 | 30152950 | 1151-Lng-A-T | 59  | chr17:30152850-30152950 |
| chr17 | 30169050 | 30169150 | 1072-Lng-A-T | 59  | chr17:30169050-30169150 |
| chr17 | 30193250 | 30193350 | 1152-Lng-A-T | 391 | chr17:30193250-30193350 |
| chr17 | 30198350 | 30198450 | 901-Lng-A-T  | 127 | chr17:30198350-30198450 |
| chr17 | 30206650 | 30206750 | 1223-Lng-C-T | 55  | chr17:30206650-30206750 |
| chr17 | 30233550 | 30233650 | 1223-Lng-C-T | 45  | chr17:30233550-30233650 |
| chr17 | 30256750 | 30256850 | 1152-Lng-A-T | 87  | chr17:30256750-30256850 |
| chr17 | 30281450 | 30281550 | 901-Lng-C-T  | 85  | chr17:30281450-30281550 |
| chr17 | 30289450 | 30289550 | 1100-Lng-A-T | 61  | chr17:30289450-30289550 |
| chr17 | 30320850 | 30320950 | 1100-Lng-A-T | 66  | chr17:30320850-30320950 |
| chr17 | 30460050 | 30460150 | 1065-Lng-A-T | 42  | chr17:30460050-30460150 |
| chr17 | 30512450 | 30512550 | 901-Lng-B-T  | 283 | chr17:30512450-30512550 |
| chr17 | 30575250 | 30575350 | 901-Lng-A-T  | 74  | chr17:30575250-30575350 |
| chr17 | 30627150 | 30627250 | 1100-Lng-A-T | 70  | chr17:30627150-30627250 |
| chr17 | 30675550 | 30675650 | 1223-Lng-A-T | 100 | chr17:30675550-30675650 |
| chr17 | 30686750 | 30686850 | 1152-Lng-A-T | 36  | chr17:30686750-30686850 |
| chr17 | 30715650 | 30715750 | 1223-Lng-A-T | 178 | chr17:30715650-30715750 |
| chr17 | 31416150 | 31416250 | 1072-Lng-A-T | 328 | chr17:31416150-31416250 |
| chr17 | 31419250 | 31419350 | 1100-Lng-A-T | 395 | chr17:31419250-31419350 |
| chr17 | 31716250 | 31716350 | 846-Lng-A-T  | 79  | chr17:31716250-31716350 |
| chr17 | 31721850 | 31721950 | 1065-Lng-C-T | 65  | chr17:31721850-31721950 |
| chr17 | 31752750 | 31752850 | 1152-Lng-A-T | 62  | chr17:31752750-31752850 |
| chr17 | 31792150 | 31792250 | 901-Lng-D-T  | 72  | chr17:31792150-31792250 |
| chr17 | 31830850 | 31830950 | 1167-Lng-A-T | 55  | chr17:31830850-31830950 |
| chr17 | 31989650 | 31989750 | 1151-Lng-A-T | 65  | chr17:31989650-31989750 |
| chr17 | 32264350 | 32264450 | 1223-Lng-B-T | 129 | chr17:32264350-32264450 |
| chr17 | 32392150 | 32392250 | 1274-Lng-A-T | 73  | chr17:32392150-32392250 |
| chr17 | 32394450 | 32394550 | 1090-Lng-A-T | 74  | chr17:32394450-32394550 |
| chr17 | 32444050 | 32444150 | 1090-Lng-B-T | 139 | chr17:32444050-32444150 |
| chr17 | 32447250 | 32447350 | 1004-Lng-A-T | 122 | chr17:32447250-32447350 |
| chr17 | 32468650 | 32468750 | 1065-Lng-C-T | 89  | chr17:32468650-32468750 |
| chr17 | 32668150 | 32668250 | 901-Lng-B-T  | 85  | chr17:32668150-32668250 |
| chr17 | 32924450 | 32924550 | 1065-Lng-B-T | 52  | chr17:32924450-32924550 |
| chr17 | 33047250 | 33047350 | 901-Lng-C-T  | 32  | chr17:33047250-33047350 |
| chr17 | 33228650 | 33228750 | 1065-Lng-B-T | 66  | chr17:33228650-33228750 |
| chr17 | 33234150 | 33234250 | 1065-Lng-A-T | 81  | chr17:33234150-33234250 |
| chr17 | 33237050 | 33237150 | 1223-Lng-C-T | 43  | chr17:33237050-33237150 |
| chr17 | 33245050 | 33245150 | 1100-Lng-A-T | 52  | chr17:33245050-33245150 |
| chr17 | 33775750 | 33775850 | 901-Lng-C-T  | 85  | chr17:33775750-33775850 |
| chr17 | 33798250 | 33798350 | 1100-Lng-A-T | 51  | chr17:33798250-33798350 |

**Table S2: SB Insertion regions**

|       |          |          |              |     |                         |
|-------|----------|----------|--------------|-----|-------------------------|
| chr17 | 33816350 | 33816450 | 1223-Lng-C-T | 116 | chr17:33816350-33816450 |
| chr17 | 33889650 | 33889750 | 1072-Lng-A-T | 51  | chr17:33889650-33889750 |
| chr17 | 34420250 | 34420350 | 1223-Lng-D-T | 143 | chr17:34420250-34420350 |
| chr17 | 34802750 | 34802850 | 901-Lng-D-T  | 281 | chr17:34802750-34802850 |
| chr17 | 34924850 | 34924950 | 846-Lng-A-T  | 109 | chr17:34924850-34924950 |
| chr17 | 35019350 | 35019450 | 1223-Lng-D-T | 67  | chr17:35019350-35019450 |
| chr17 | 35124250 | 35124350 | 1167-Lng-A-T | 476 | chr17:35124250-35124350 |
| chr17 | 35125250 | 35125350 | 1223-Lng-C-T | 72  | chr17:35125250-35125350 |
| chr17 | 35145950 | 35146050 | 1223-Lng-D-T | 187 | chr17:35145950-35146050 |
| chr17 | 35178650 | 35178750 | 1167-Lng-A-T | 84  | chr17:35178650-35178750 |
| chr17 | 35240850 | 35240950 | 1167-Lng-A-T | 86  | chr17:35240850-35240950 |
| chr17 | 35288950 | 35289050 | 1223-Lng-C-T | 50  | chr17:35288950-35289050 |
| chr17 | 35297750 | 35297850 | 901-Lng-A-T  | 52  | chr17:35297750-35297850 |
| chr17 | 35919750 | 35919850 | 901-Lng-A-T  | 404 | chr17:35919750-35919850 |
| chr17 | 36178550 | 36178650 | 1188-Lng-A-T | 118 | chr17:36178550-36178650 |
| chr17 | 36423750 | 36423850 | 1065-Lng-B-T | 333 | chr17:36423750-36423850 |
| chr17 | 36935050 | 36935150 | 1065-Lng-C-T | 98  | chr17:36935050-36935150 |
| chr17 | 37141250 | 37141350 | 1065-Lng-B-T | 48  | chr17:37141250-37141350 |
| chr17 | 37186050 | 37186150 | 1223-Lng-C-T | 48  | chr17:37186050-37186150 |
| chr17 | 37502150 | 37502250 | 1223-Lng-B-T | 35  | chr17:37502150-37502250 |
| chr17 | 37720950 | 37721050 | 901-Lng-A-T  | 82  | chr17:37720950-37721050 |
| chr17 | 37725150 | 37725250 | 1065-Lng-A-T | 237 | chr17:37725150-37725250 |
| chr17 | 37884050 | 37884150 | 1274-Lng-A-T | 59  | chr17:37884050-37884150 |
| chr17 | 37899150 | 37899250 | 1223-Lng-B-T | 37  | chr17:37899150-37899250 |
| chr17 | 38110250 | 38110350 | 1223-Lng-C-T | 50  | chr17:38110250-38110350 |
| chr17 | 38247550 | 38247650 | 1065-Lng-B-T | 55  | chr17:38247550-38247650 |
| chr17 | 38429550 | 38429650 | 901-Lng-C-T  | 46  | chr17:38429550-38429650 |
| chr17 | 38433550 | 38433650 | 1274-Lng-A-T | 54  | chr17:38433550-38433650 |
| chr17 | 38753950 | 38754050 | 1072-Lng-A-T | 51  | chr17:38753950-38754050 |
| chr17 | 38855950 | 38856050 | 1065-Lng-A-T | 97  | chr17:38855950-38856050 |
| chr17 | 38985850 | 38985950 | 1065-Lng-C-T | 116 | chr17:38985850-38985950 |
| chr17 | 39073650 | 39073750 | 901-Lng-A-T  | 82  | chr17:39073650-39073750 |
| chr17 | 39226850 | 39226950 | 1188-Lng-A-T | 38  | chr17:39226850-39226950 |
| chr17 | 39499750 | 39499850 | 1100-Lng-A-T | 71  | chr17:39499750-39499850 |
| chr17 | 39519350 | 39519450 | 1152-Lng-A-T | 52  | chr17:39519350-39519450 |
| chr17 | 39923550 | 39923650 | 1065-Lng-B-T | 60  | chr17:39923550-39923650 |
| chr17 | 40113950 | 40114050 | 846-Lng-A-T  | 71  | chr17:40113950-40114050 |
| chr17 | 40355950 | 40356050 | 1274-Lng-A-T | 102 | chr17:40355950-40356050 |
| chr17 | 40518950 | 40519050 | 1065-Lng-B-T | 363 | chr17:40518950-40519050 |
| chr17 | 40696150 | 40696250 | 1065-Lng-B-T | 84  | chr17:40696150-40696250 |
| chr17 | 40798550 | 40798650 | 1223-Lng-D-T | 43  | chr17:40798550-40798650 |
| chr17 | 40960250 | 40960350 | 846-Lng-A-T  | 159 | chr17:40960250-40960350 |
| chr17 | 41085450 | 41085550 | 1100-Lng-A-T | 77  | chr17:41085450-41085550 |
| chr17 | 41416450 | 41416550 | 901-Lng-A-T  | 119 | chr17:41416450-41416550 |
| chr17 | 41440150 | 41440250 | 1065-Lng-B-T | 53  | chr17:41440150-41440250 |
| chr17 | 41755650 | 41755750 | 1065-Lng-A-T | 47  | chr17:41755650-41755750 |

**Table S2: SB Insertion regions**

|       |          |          |              |     |                         |
|-------|----------|----------|--------------|-----|-------------------------|
| chr17 | 41940450 | 41940550 | 1065-Lng-C-T | 98  | chr17:41940450-41940550 |
| chr17 | 41943950 | 41944050 | 901-Lng-B-T  | 120 | chr17:41943950-41944050 |
| chr17 | 41954450 | 41954550 | 1065-Lng-C-T | 95  | chr17:41954450-41954550 |
| chr17 | 42092250 | 42092350 | 901-Lng-D-T  | 157 | chr17:42092250-42092350 |
| chr17 | 42766050 | 42766150 | 1223-Lng-B-T | 58  | chr17:42766050-42766150 |
| chr17 | 42767950 | 42768050 | 1188-Lng-A-T | 49  | chr17:42767950-42768050 |
| chr17 | 42769150 | 42769250 | 1065-Lng-A-T | 38  | chr17:42769150-42769250 |
| chr17 | 42838350 | 42838450 | 901-Lng-C-T  | 39  | chr17:42838350-42838450 |
| chr17 | 42931650 | 42931750 | 901-Lng-B-T  | 62  | chr17:42931650-42931750 |
| chr17 | 42956950 | 42957050 | 1090-Lng-A-T | 129 | chr17:42956950-42957050 |
| chr17 | 42974050 | 42974150 | 1100-Lng-A-T | 273 | chr17:42974050-42974150 |
| chr17 | 43003250 | 43003350 | 1188-Lng-A-T | 212 | chr17:43003250-43003350 |
| chr17 | 43005050 | 43005150 | 1065-Lng-A-T | 62  | chr17:43005050-43005150 |
| chr17 | 43314950 | 43315050 | 1188-Lng-A-T | 40  | chr17:43314950-43315050 |
| chr17 | 43374350 | 43374450 | 901-Lng-A-T  | 100 | chr17:43374350-43374450 |
| chr17 | 43376550 | 43376650 | 846-Lng-A-T  | 347 | chr17:43376550-43376650 |
| chr17 | 43445450 | 43445550 | 1188-Lng-A-T | 242 | chr17:43445450-43445550 |
| chr17 | 43563250 | 43563350 | 1090-Lng-A-T | 95  | chr17:43563250-43563350 |
| chr17 | 43574350 | 43574450 | 1274-Lng-A-T | 56  | chr17:43574350-43574450 |
| chr17 | 43581850 | 43581950 | 1090-Lng-A-T | 65  | chr17:43581850-43581950 |
| chr17 | 43595550 | 43595650 | 901-Lng-C-T  | 56  | chr17:43595550-43595650 |
| chr17 | 43638450 | 43638550 | 1065-Lng-B-T | 56  | chr17:43638450-43638550 |
| chr17 | 43882750 | 43882850 | 1151-Lng-A-T | 340 | chr17:43882750-43882850 |
| chr17 | 44058450 | 44058550 | 901-Lng-C-T  | 269 | chr17:44058450-44058550 |
| chr17 | 44094150 | 44094250 | 1004-Lng-A-T | 72  | chr17:44094150-44094250 |
| chr17 | 44259450 | 44259550 | 846-Lng-A-T  | 150 | chr17:44259450-44259550 |
| chr17 | 44284650 | 44284750 | 1223-Lng-A-T | 211 | chr17:44284650-44284750 |
| chr17 | 44349950 | 44350050 | 1100-Lng-A-T | 146 | chr17:44349950-44350050 |
| chr17 | 44445050 | 44445150 | 1223-Lng-B-T | 58  | chr17:44445050-44445150 |
| chr17 | 44476150 | 44476250 | 901-Lng-B-T  | 69  | chr17:44476150-44476250 |
| chr17 | 44847250 | 44847350 | 1274-Lng-A-T | 58  | chr17:44847250-44847350 |
| chr17 | 44995050 | 44995150 | 846-Lng-A-T  | 221 | chr17:44995050-44995150 |
| chr17 | 45042450 | 45042550 | 901-Lng-B-T  | 100 | chr17:45042450-45042550 |
| chr17 | 45147550 | 45147650 | 1223-Lng-C-T | 139 | chr17:45147550-45147650 |
| chr17 | 45343150 | 45343250 | 1065-Lng-C-T | 73  | chr17:45343150-45343250 |
| chr17 | 45577550 | 45577650 | 1167-Lng-A-T | 67  | chr17:45577550-45577650 |
| chr17 | 45585150 | 45585250 | 1223-Lng-B-T | 61  | chr17:45585150-45585250 |
| chr17 | 45860850 | 45860950 | 1100-Lng-A-T | 65  | chr17:45860850-45860950 |
| chr17 | 45887850 | 45887950 | 1100-Lng-B-T | 51  | chr17:45887850-45887950 |
| chr17 | 46131950 | 46132050 | 1274-Lng-A-T | 123 | chr17:46131950-46132050 |
| chr17 | 46148850 | 46148950 | 1065-Lng-A-T | 41  | chr17:46148850-46148950 |
| chr17 | 46306750 | 46306850 | 1100-Lng-B-T | 110 | chr17:46306750-46306850 |
| chr17 | 46345950 | 46346050 | 1223-Lng-A-T | 162 | chr17:46345950-46346050 |
| chr17 | 46430250 | 46430350 | 901-Lng-B-T  | 55  | chr17:46430250-46430350 |
| chr17 | 46481150 | 46481250 | 1065-Lng-C-T | 64  | chr17:46481150-46481250 |
| chr17 | 46554450 | 46554550 | 1274-Lng-A-T | 109 | chr17:46554450-46554550 |

**Table S2: SB Insertion regions**

|       |          |          |              |     |                         |
|-------|----------|----------|--------------|-----|-------------------------|
| chr17 | 46706350 | 46706450 | 1188-Lng-A-T | 86  | chr17:46706350-46706450 |
| chr17 | 46737550 | 46737650 | 1223-Lng-B-T | 240 | chr17:46737550-46737650 |
| chr17 | 47000250 | 47000350 | 1065-Lng-C-T | 72  | chr17:47000250-47000350 |
| chr17 | 47126950 | 47127050 | 1223-Lng-A-T | 171 | chr17:47126950-47127050 |
| chr17 | 47531050 | 47531150 | 1223-Lng-C-T | 47  | chr17:47531050-47531150 |
| chr17 | 47579950 | 47580050 | 1152-Lng-A-T | 166 | chr17:47579950-47580050 |
| chr17 | 47683450 | 47683550 | 1065-Lng-C-T | 118 | chr17:47683450-47683550 |
| chr17 | 47691150 | 47691250 | 846-Lng-A-T  | 70  | chr17:47691150-47691250 |
| chr17 | 47691350 | 47691450 | 1100-Lng-A-T | 70  | chr17:47691350-47691450 |
| chr17 | 47712150 | 47712250 | 1004-Lng-A-T | 111 | chr17:47712150-47712250 |
| chr17 | 47814550 | 47814650 | 1004-Lng-A-T | 78  | chr17:47814550-47814650 |
| chr17 | 47904350 | 47904450 | 1004-Lng-A-T | 598 | chr17:47904350-47904450 |
| chr17 | 48059650 | 48059750 | 1223-Lng-C-T | 158 | chr17:48059650-48059750 |
| chr17 | 48072950 | 48073050 | 1274-Lng-A-T | 49  | chr17:48072950-48073050 |
| chr17 | 48165450 | 48165550 | 1188-Lng-A-T | 100 | chr17:48165450-48165550 |
| chr17 | 48205250 | 48205350 | 1100-Lng-A-T | 53  | chr17:48205250-48205350 |
| chr17 | 48205950 | 48206050 | 1188-Lng-A-T | 35  | chr17:48205950-48206050 |
| chr17 | 48536450 | 48536550 | 1274-Lng-A-T | 150 | chr17:48536450-48536550 |
| chr17 | 48538550 | 48538650 | 1072-Lng-A-T | 182 | chr17:48538550-48538650 |
| chr17 | 48882050 | 48882150 | 1090-Lng-A-T | 88  | chr17:48882050-48882150 |
| chr17 | 49500250 | 49500350 | 1151-Lng-A-T | 309 | chr17:49500250-49500350 |
| chr17 | 49560150 | 49560250 | 1100-Lng-B-T | 74  | chr17:49560150-49560250 |
| chr17 | 49697550 | 49697650 | 1274-Lng-A-T | 51  | chr17:49697550-49697650 |
| chr17 | 49768650 | 49768750 | 1065-Lng-B-T | 52  | chr17:49768650-49768750 |
| chr17 | 50093350 | 50093450 | 1188-Lng-A-T | 43  | chr17:50093350-50093450 |
| chr17 | 50221350 | 50221450 | 1188-Lng-A-T | 41  | chr17:50221350-50221450 |
| chr17 | 50504850 | 50504950 | 1223-Lng-D-T | 49  | chr17:50504850-50504950 |
| chr17 | 50863650 | 50863750 | 1100-Lng-B-T | 68  | chr17:50863650-50863750 |
| chr17 | 50962250 | 50962350 | 901-Lng-A-T  | 79  | chr17:50962250-50962350 |
| chr17 | 51065250 | 51065350 | 1223-Lng-B-T | 260 | chr17:51065250-51065350 |
| chr17 | 51074950 | 51075050 | 901-Lng-C-T  | 34  | chr17:51074950-51075050 |
| chr17 | 51083550 | 51083650 | 1152-Lng-A-T | 93  | chr17:51083550-51083650 |
| chr17 | 51124250 | 51124350 | 1223-Lng-C-T | 64  | chr17:51124250-51124350 |
| chr17 | 51137450 | 51137550 | 1223-Lng-A-T | 93  | chr17:51137450-51137550 |
| chr17 | 51171150 | 51171250 | 1004-Lng-A-T | 73  | chr17:51171150-51171250 |
| chr17 | 51180450 | 51180550 | 901-Lng-B-T  | 66  | chr17:51180450-51180550 |
| chr17 | 51182050 | 51182150 | 901-Lng-B-T  | 170 | chr17:51182050-51182150 |
| chr17 | 51216350 | 51216450 | 1090-Lng-B-T | 552 | chr17:51216350-51216450 |
| chr17 | 51280350 | 51280450 | 1274-Lng-A-T | 78  | chr17:51280350-51280450 |
| chr17 | 51308750 | 51308850 | 1223-Lng-D-T | 57  | chr17:51308750-51308850 |
| chr17 | 51313950 | 51314050 | 1274-Lng-A-T | 74  | chr17:51313950-51314050 |
| chr17 | 51606650 | 51606750 | 1223-Lng-A-T | 95  | chr17:51606650-51606750 |
| chr17 | 51839050 | 51839150 | 1223-Lng-B-T | 36  | chr17:51839050-51839150 |
| chr17 | 51894550 | 51894650 | 1090-Lng-A-T | 61  | chr17:51894550-51894650 |
| chr17 | 51934350 | 51934450 | 1223-Lng-A-T | 122 | chr17:51934350-51934450 |
| chr17 | 52311950 | 52312050 | 901-Lng-A-T  | 77  | chr17:52311950-52312050 |

**Table S2: SB Insertion regions**

|       |          |          |              |     |                         |
|-------|----------|----------|--------------|-----|-------------------------|
| chr17 | 52411650 | 52411750 | 901-Lng-A-T  | 160 | chr17:52411650-52411750 |
| chr17 | 52529350 | 52529450 | 846-Lng-A-T  | 418 | chr17:52529350-52529450 |
| chr17 | 52576750 | 52576850 | 1065-Lng-C-T | 717 | chr17:52576750-52576850 |
| chr17 | 52812250 | 52812350 | 1090-Lng-A-T | 137 | chr17:52812250-52812350 |
| chr17 | 52841150 | 52841250 | 1188-Lng-A-T | 40  | chr17:52841150-52841250 |
| chr17 | 52858750 | 52858850 | 1100-Lng-A-T | 95  | chr17:52858750-52858850 |
| chr17 | 52946150 | 52946250 | 1065-Lng-B-T | 95  | chr17:52946150-52946250 |
| chr17 | 53047950 | 53048050 | 901-Lng-C-T  | 32  | chr17:53047950-53048050 |
| chr17 | 53102350 | 53102450 | 1065-Lng-A-T | 132 | chr17:53102350-53102450 |
| chr17 | 53145450 | 53145550 | 1065-Lng-A-T | 74  | chr17:53145450-53145550 |
| chr17 | 53493250 | 53493350 | 1072-Lng-A-T | 72  | chr17:53493250-53493350 |
| chr17 | 53623850 | 53623950 | 1100-Lng-B-T | 56  | chr17:53623850-53623950 |
| chr17 | 53767550 | 53767650 | 1100-Lng-A-T | 55  | chr17:53767550-53767650 |
| chr17 | 53774950 | 53775050 | 901-Lng-D-T  | 82  | chr17:53774950-53775050 |
| chr17 | 53794450 | 53794550 | 901-Lng-A-T  | 92  | chr17:53794450-53794550 |
| chr17 | 54040150 | 54040250 | 1188-Lng-A-T | 44  | chr17:54040150-54040250 |
| chr17 | 54774650 | 54774750 | 846-Lng-A-T  | 119 | chr17:54774650-54774750 |
| chr17 | 55069050 | 55069150 | 1004-Lng-A-T | 118 | chr17:55069050-55069150 |
| chr17 | 55186350 | 55186450 | 1004-Lng-A-T | 124 | chr17:55186350-55186450 |
| chr17 | 55269950 | 55270050 | 846-Lng-A-T  | 183 | chr17:55269950-55270050 |
| chr17 | 55309950 | 55310050 | 1072-Lng-A-T | 67  | chr17:55309950-55310050 |
| chr17 | 55551150 | 55551250 | 1151-Lng-A-T | 64  | chr17:55551150-55551250 |
| chr17 | 55640950 | 55641050 | 1274-Lng-A-T | 64  | chr17:55640950-55641050 |
| chr17 | 55731450 | 55731550 | 1152-Lng-A-T | 124 | chr17:55731450-55731550 |
| chr17 | 55888850 | 55888950 | 1090-Lng-A-T | 188 | chr17:55888850-55888950 |
| chr17 | 55925150 | 55925250 | 1274-Lng-A-T | 238 | chr17:55925150-55925250 |
| chr17 | 56080650 | 56080750 | 1090-Lng-A-T | 82  | chr17:56080650-56080750 |
| chr17 | 56173850 | 56173950 | 1090-Lng-B-T | 459 | chr17:56173850-56173950 |
| chr17 | 56225850 | 56225950 | 1152-Lng-A-T | 144 | chr17:56225850-56225950 |
| chr17 | 56282550 | 56282650 | 1274-Lng-A-T | 66  | chr17:56282550-56282650 |
| chr17 | 56332250 | 56332350 | 1090-Lng-A-T | 63  | chr17:56332250-56332350 |
| chr17 | 56337350 | 56337450 | 1274-Lng-A-T | 150 | chr17:56337350-56337450 |
| chr17 | 56445650 | 56445750 | 1223-Lng-D-T | 374 | chr17:56445650-56445750 |
| chr17 | 56516050 | 56516150 | 1065-Lng-B-T | 50  | chr17:56516050-56516150 |
| chr17 | 56580550 | 56580650 | 1065-Lng-A-T | 105 | chr17:56580550-56580650 |
| chr17 | 56720350 | 56720450 | 1072-Lng-A-T | 49  | chr17:56720350-56720450 |
| chr17 | 57049650 | 57049750 | 1223-Lng-A-T | 91  | chr17:57049650-57049750 |
| chr17 | 57305350 | 57305450 | 1004-Lng-A-T | 112 | chr17:57305350-57305450 |
| chr17 | 58010950 | 58011050 | 1223-Lng-D-T | 52  | chr17:58010950-58011050 |
| chr17 | 58087150 | 58087250 | 1223-Lng-C-T | 55  | chr17:58087150-58087250 |
| chr17 | 58140950 | 58141050 | 901-Lng-A-T  | 131 | chr17:58140950-58141050 |
| chr17 | 58349050 | 58349150 | 1065-Lng-A-T | 63  | chr17:58349050-58349150 |
| chr17 | 58550850 | 58550950 | 1223-Lng-D-T | 43  | chr17:58550850-58550950 |
| chr17 | 58637250 | 58637350 | 1223-Lng-B-T | 130 | chr17:58637250-58637350 |
| chr17 | 58854550 | 58854650 | 1152-Lng-A-T | 82  | chr17:58854550-58854650 |
| chr17 | 58935250 | 58935350 | 1065-Lng-C-T | 81  | chr17:58935250-58935350 |

**Table S2: SB Insertion regions**

|       |          |          |              |     |                         |
|-------|----------|----------|--------------|-----|-------------------------|
| chr17 | 59092550 | 59092650 | 1100-Lng-A-T | 132 | chr17:59092550-59092650 |
| chr17 | 59107650 | 59107750 | 846-Lng-A-T  | 57  | chr17:59107650-59107750 |
| chr17 | 59142050 | 59142150 | 1090-Lng-B-T | 365 | chr17:59142050-59142150 |
| chr17 | 59263250 | 59263350 | 1065-Lng-A-T | 55  | chr17:59263250-59263350 |
| chr17 | 59317250 | 59317350 | 1152-Lng-A-T | 110 | chr17:59317250-59317350 |
| chr17 | 59488050 | 59488150 | 1065-Lng-C-T | 77  | chr17:59488050-59488150 |
| chr17 | 59519750 | 59519850 | 901-Lng-D-T  | 398 | chr17:59519750-59519850 |
| chr17 | 59547850 | 59547950 | 1065-Lng-A-T | 89  | chr17:59547850-59547950 |
| chr17 | 59580550 | 59580650 | 1090-Lng-A-T | 61  | chr17:59580550-59580650 |
| chr17 | 59698750 | 59698850 | 1090-Lng-A-T | 67  | chr17:59698750-59698850 |
| chr17 | 59784750 | 59784850 | 1072-Lng-A-T | 205 | chr17:59784750-59784850 |
| chr17 | 59868150 | 59868250 | 1100-Lng-A-T | 130 | chr17:59868150-59868250 |
| chr17 | 59941350 | 59941450 | 1065-Lng-A-T | 38  | chr17:59941350-59941450 |
| chr17 | 60028250 | 60028350 | 1151-Lng-A-T | 77  | chr17:60028250-60028350 |
| chr17 | 60059550 | 60059650 | 1223-Lng-B-T | 39  | chr17:60059550-60059650 |
| chr17 | 60078350 | 60078450 | 901-Lng-C-T  | 53  | chr17:60078350-60078450 |
| chr17 | 60228050 | 60228150 | 1167-Lng-A-T | 48  | chr17:60228050-60228150 |
| chr17 | 60313150 | 60313250 | 1072-Lng-A-T | 121 | chr17:60313150-60313250 |
| chr17 | 60332150 | 60332250 | 1167-Lng-A-T | 117 | chr17:60332150-60332250 |
| chr17 | 60513750 | 60513850 | 1152-Lng-A-T | 68  | chr17:60513750-60513850 |
| chr17 | 60624950 | 60625050 | 846-Lng-A-T  | 93  | chr17:60624950-60625050 |
| chr17 | 60777550 | 60777650 | 1167-Lng-A-T | 65  | chr17:60777550-60777650 |
| chr17 | 60888350 | 60888450 | 1152-Lng-A-T | 41  | chr17:60888350-60888450 |
| chr17 | 60967650 | 60967750 | 1223-Lng-A-T | 51  | chr17:60967650-60967750 |
| chr17 | 61105850 | 61105950 | 901-Lng-C-T  | 196 | chr17:61105850-61105950 |
| chr17 | 61107750 | 61107850 | 1065-Lng-A-T | 49  | chr17:61107750-61107850 |
| chr17 | 61143950 | 61144050 | 1065-Lng-C-T | 63  | chr17:61143950-61144050 |
| chr17 | 61167750 | 61167850 | 1065-Lng-C-T | 82  | chr17:61167750-61167850 |
| chr17 | 61272450 | 61272550 | 901-Lng-B-T  | 85  | chr17:61272450-61272550 |
| chr17 | 61279850 | 61279950 | 1004-Lng-A-T | 95  | chr17:61279850-61279950 |
| chr17 | 61282450 | 61282550 | 1152-Lng-A-T | 161 | chr17:61282450-61282550 |
| chr17 | 61398750 | 61398850 | 901-Lng-C-T  | 28  | chr17:61398750-61398850 |
| chr17 | 61536450 | 61536550 | 1065-Lng-B-T | 46  | chr17:61536450-61536550 |
| chr17 | 61589850 | 61589950 | 901-Lng-A-T  | 54  | chr17:61589850-61589950 |
| chr17 | 61643050 | 61643150 | 1152-Lng-A-T | 73  | chr17:61643050-61643150 |
| chr17 | 61754850 | 61754950 | 1065-Lng-C-T | 90  | chr17:61754850-61754950 |
| chr17 | 62619450 | 62619550 | 1100-Lng-A-T | 51  | chr17:62619450-62619550 |
| chr17 | 63057450 | 63057550 | 1223-Lng-C-T | 80  | chr17:63057450-63057550 |
| chr17 | 63104350 | 63104450 | 901-Lng-D-T  | 316 | chr17:63104350-63104450 |
| chr17 | 63208150 | 63208250 | 1065-Lng-B-T | 53  | chr17:63208150-63208250 |
| chr17 | 63399650 | 63399750 | 1065-Lng-B-T | 47  | chr17:63399650-63399750 |
| chr17 | 63407850 | 63407950 | 1065-Lng-A-T | 122 | chr17:63407850-63407950 |
| chr17 | 63456550 | 63456650 | 1188-Lng-A-T | 42  | chr17:63456550-63456650 |
| chr17 | 63483350 | 63483450 | 846-Lng-A-T  | 108 | chr17:63483350-63483450 |
| chr17 | 63485050 | 63485150 | 1223-Lng-B-T | 67  | chr17:63485050-63485150 |
| chr17 | 63501050 | 63501150 | 1065-Lng-A-T | 35  | chr17:63501050-63501150 |

**Table S2: SB Insertion regions**

|       |          |          |              |     |                         |
|-------|----------|----------|--------------|-----|-------------------------|
| chr17 | 63507050 | 63507150 | 901-Lng-A-T  | 53  | chr17:63507050-63507150 |
| chr17 | 63508050 | 63508150 | 1167-Lng-A-T | 113 | chr17:63508050-63508150 |
| chr17 | 63592050 | 63592150 | 846-Lng-A-T  | 172 | chr17:63592050-63592150 |
| chr17 | 63634050 | 63634150 | 1188-Lng-A-T | 35  | chr17:63634050-63634150 |
| chr17 | 63672950 | 63673050 | 846-Lng-A-T  | 131 | chr17:63672950-63673050 |
| chr17 | 63721850 | 63721950 | 1152-Lng-A-T | 67  | chr17:63721850-63721950 |
| chr17 | 63804750 | 63804850 | 1065-Lng-A-T | 44  | chr17:63804750-63804850 |
| chr17 | 63814250 | 63814350 | 1065-Lng-C-T | 95  | chr17:63814250-63814350 |
| chr17 | 63954350 | 63954450 | 1223-Lng-D-T | 46  | chr17:63954350-63954450 |
| chr17 | 64135750 | 64135850 | 901-Lng-A-T  | 71  | chr17:64135750-64135850 |
| chr17 | 64247750 | 64247850 | 1100-Lng-A-T | 58  | chr17:64247750-64247850 |
| chr17 | 64294050 | 64294150 | 901-Lng-B-T  | 319 | chr17:64294050-64294150 |
| chr17 | 64294150 | 64294250 | 1167-Lng-A-T | 109 | chr17:64294150-64294250 |
| chr17 | 64296950 | 64297050 | 1188-Lng-A-T | 56  | chr17:64296950-64297050 |
| chr17 | 64301150 | 64301250 | 901-Lng-D-T  | 274 | chr17:64301150-64301250 |
| chr17 | 64410050 | 64410150 | 901-Lng-B-T  | 67  | chr17:64410050-64410150 |
| chr17 | 64638250 | 64638350 | 1090-Lng-A-T | 84  | chr17:64638250-64638350 |
| chr17 | 64761150 | 64761250 | 901-Lng-B-T  | 144 | chr17:64761150-64761250 |
| chr17 | 64807650 | 64807750 | 1274-Lng-A-T | 66  | chr17:64807650-64807750 |
| chr17 | 64977650 | 64977750 | 1274-Lng-A-T | 228 | chr17:64977650-64977750 |
| chr17 | 65034550 | 65034650 | 1065-Lng-A-T | 87  | chr17:65034550-65034650 |
| chr17 | 65048850 | 65048950 | 1065-Lng-B-T | 87  | chr17:65048850-65048950 |
| chr17 | 65049550 | 65049650 | 901-Lng-C-T  | 160 | chr17:65049550-65049650 |
| chr17 | 65079550 | 65079650 | 1151-Lng-A-T | 126 | chr17:65079550-65079650 |
| chr17 | 65088550 | 65088650 | 1274-Lng-A-T | 107 | chr17:65088550-65088650 |
| chr17 | 65113750 | 65113850 | 1065-Lng-A-T | 53  | chr17:65113750-65113850 |
| chr17 | 65196050 | 65196150 | 901-Lng-A-T  | 266 | chr17:65196050-65196150 |
| chr17 | 65234050 | 65234150 | 846-Lng-A-T  | 57  | chr17:65234050-65234150 |
| chr17 | 65383550 | 65383650 | 1065-Lng-C-T | 85  | chr17:65383550-65383650 |
| chr17 | 65397450 | 65397550 | 1223-Lng-C-T | 45  | chr17:65397450-65397550 |
| chr17 | 65452250 | 65452350 | 1274-Lng-A-T | 229 | chr17:65452250-65452350 |
| chr17 | 65454850 | 65454950 | 1004-Lng-A-T | 57  | chr17:65454850-65454950 |
| chr17 | 65570550 | 65570650 | 1223-Lng-A-T | 112 | chr17:65570550-65570650 |
| chr17 | 65675850 | 65675950 | 1065-Lng-C-T | 67  | chr17:65675850-65675950 |
| chr17 | 65687150 | 65687250 | 901-Lng-B-T  | 214 | chr17:65687150-65687250 |
| chr17 | 65698650 | 65698750 | 1274-Lng-A-T | 61  | chr17:65698650-65698750 |
| chr17 | 65910550 | 65910650 | 1090-Lng-A-T | 100 | chr17:65910550-65910650 |
| chr17 | 65924850 | 65924950 | 901-Lng-A-T  | 52  | chr17:65924850-65924950 |
| chr17 | 65937850 | 65937950 | 1152-Lng-A-T | 116 | chr17:65937850-65937950 |
| chr17 | 65939550 | 65939650 | 1004-Lng-A-T | 55  | chr17:65939550-65939650 |
| chr17 | 65944050 | 65944150 | 901-Lng-C-T  | 31  | chr17:65944050-65944150 |
| chr17 | 65957950 | 65958050 | 1065-Lng-C-T | 443 | chr17:65957950-65958050 |
| chr17 | 66293950 | 66294050 | 1274-Lng-A-T | 169 | chr17:66293950-66294050 |
| chr17 | 66301350 | 66301450 | 1090-Lng-A-T | 81  | chr17:66301350-66301450 |
| chr17 | 66310550 | 66310650 | 1223-Lng-C-T | 52  | chr17:66310550-66310650 |
| chr17 | 66315150 | 66315250 | 1004-Lng-A-T | 55  | chr17:66315150-66315250 |

**Table S2: SB Insertion regions**

|       |          |          |              |     |                         |
|-------|----------|----------|--------------|-----|-------------------------|
| chr17 | 66427450 | 66427550 | 1090-Lng-A-T | 47  | chr17:66427450-66427550 |
| chr17 | 66430350 | 66430450 | 1223-Lng-C-T | 52  | chr17:66430350-66430450 |
| chr17 | 66442350 | 66442450 | 1274-Lng-A-T | 187 | chr17:66442350-66442450 |
| chr17 | 66446450 | 66446550 | 901-Lng-B-T  | 133 | chr17:66446450-66446550 |
| chr17 | 66695550 | 66695650 | 846-Lng-A-T  | 58  | chr17:66695550-66695650 |
| chr17 | 66705950 | 66706050 | 1065-Lng-B-T | 222 | chr17:66705950-66706050 |
| chr17 | 66765650 | 66765750 | 901-Lng-A-T  | 73  | chr17:66765650-66765750 |
| chr17 | 66908450 | 66908550 | 1100-Lng-A-T | 118 | chr17:66908450-66908550 |
| chr17 | 67010250 | 67010350 | 901-Lng-A-T  | 78  | chr17:67010250-67010350 |
| chr17 | 67021450 | 67021550 | 1151-Lng-A-T | 95  | chr17:67021450-67021550 |
| chr17 | 67087050 | 67087150 | 846-Lng-A-T  | 72  | chr17:67087050-67087150 |
| chr17 | 67126050 | 67126150 | 1152-Lng-A-T | 40  | chr17:67126050-67126150 |
| chr17 | 67243250 | 67243350 | 1152-Lng-A-T | 77  | chr17:67243250-67243350 |
| chr17 | 67273350 | 67273450 | 1065-Lng-C-T | 63  | chr17:67273350-67273450 |
| chr17 | 67277550 | 67277650 | 1274-Lng-A-T | 81  | chr17:67277550-67277650 |
| chr17 | 67398250 | 67398350 | 1223-Lng-A-T | 230 | chr17:67398250-67398350 |
| chr17 | 67404450 | 67404550 | 1072-Lng-A-T | 75  | chr17:67404450-67404550 |
| chr17 | 67411650 | 67411750 | 1065-Lng-C-T | 93  | chr17:67411650-67411750 |
| chr17 | 67428350 | 67428450 | 1090-Lng-A-T | 110 | chr17:67428350-67428450 |
| chr17 | 67479450 | 67479550 | 1167-Lng-A-T | 60  | chr17:67479450-67479550 |
| chr17 | 67523250 | 67523350 | 1065-Lng-A-T | 50  | chr17:67523250-67523350 |
| chr17 | 67611450 | 67611550 | 1100-Lng-A-T | 70  | chr17:67611450-67611550 |
| chr17 | 67614150 | 67614250 | 901-Lng-B-T  | 101 | chr17:67614150-67614250 |
| chr17 | 67655850 | 67655950 | 1065-Lng-A-T | 71  | chr17:67655850-67655950 |
| chr17 | 67682750 | 67682850 | 1223-Lng-C-T | 49  | chr17:67682750-67682850 |
| chr17 | 67875850 | 67875950 | 1152-Lng-A-T | 82  | chr17:67875850-67875950 |
| chr17 | 67891050 | 67891150 | 846-Lng-A-T  | 150 | chr17:67891050-67891150 |
| chr17 | 68318050 | 68318150 | 1065-Lng-B-T | 59  | chr17:68318050-68318150 |
| chr17 | 68404950 | 68405050 | 1072-Lng-A-T | 63  | chr17:68404950-68405050 |
| chr17 | 68614850 | 68614950 | 1065-Lng-C-T | 80  | chr17:68614850-68614950 |
| chr17 | 68770150 | 68770250 | 846-Lng-A-T  | 137 | chr17:68770150-68770250 |
| chr17 | 68876450 | 68876550 | 1274-Lng-A-T | 142 | chr17:68876450-68876550 |
| chr17 | 69235850 | 69235950 | 1274-Lng-A-T | 53  | chr17:69235850-69235950 |
| chr17 | 69240850 | 69240950 | 1151-Lng-A-T | 277 | chr17:69240850-69240950 |
| chr17 | 69306050 | 69306150 | 1090-Lng-B-T | 109 | chr17:69306050-69306150 |
| chr17 | 69548550 | 69548650 | 1090-Lng-A-T | 82  | chr17:69548550-69548650 |
| chr17 | 69651450 | 69651550 | 1065-Lng-C-T | 107 | chr17:69651450-69651550 |
| chr17 | 69772150 | 69772250 | 1223-Lng-A-T | 124 | chr17:69772150-69772250 |
| chr17 | 70046950 | 70047050 | 1090-Lng-A-T | 121 | chr17:70046950-70047050 |
| chr17 | 70328350 | 70328450 | 1223-Lng-B-T | 36  | chr17:70328350-70328450 |
| chr17 | 70429650 | 70429750 | 846-Lng-A-T  | 43  | chr17:70429650-70429750 |
| chr17 | 70536650 | 70536750 | 1065-Lng-B-T | 65  | chr17:70536650-70536750 |
| chr17 | 70595850 | 70595950 | 901-Lng-A-T  | 109 | chr17:70595850-70595950 |
| chr17 | 70618650 | 70618750 | 1065-Lng-B-T | 69  | chr17:70618650-70618750 |
| chr17 | 70799750 | 70799850 | 1072-Lng-A-T | 120 | chr17:70799750-70799850 |
| chr17 | 71206450 | 71206550 | 1151-Lng-A-T | 100 | chr17:71206450-71206550 |



**Table S2: SB Insertion regions**

|       |          |          |              |      |                         |
|-------|----------|----------|--------------|------|-------------------------|
| chr17 | 71350050 | 71350150 | 901-Lng-A-T  | 67   | chr17:71350050-71350150 |
| chr17 | 71480050 | 71480150 | 1274-Lng-A-T | 79   | chr17:71480050-71480150 |
| chr17 | 71516950 | 71517050 | 1274-Lng-A-T | 54   | chr17:71516950-71517050 |
| chr17 | 71572750 | 71572850 | 1188-Lng-A-T | 52   | chr17:71572750-71572850 |
| chr17 | 71582550 | 71582650 | 1004-Lng-A-T | 122  | chr17:71582550-71582650 |
| chr17 | 71583350 | 71583450 | 1065-Lng-A-T | 55   | chr17:71583350-71583450 |
| chr17 | 71592250 | 71592350 | 1004-Lng-A-T | 60   | chr17:71592250-71592350 |
| chr17 | 71601950 | 71602050 | 1100-Lng-A-T | 110  | chr17:71601950-71602050 |
| chr17 | 71708550 | 71708650 | 1223-Lng-B-T | 46   | chr17:71708550-71708650 |
| chr17 | 71714350 | 71714450 | 1065-Lng-A-T | 37   | chr17:71714350-71714450 |
| chr17 | 71723950 | 71724050 | 1223-Lng-C-T | 468  | chr17:71723950-71724050 |
| chr17 | 71753350 | 71753450 | 1223-Lng-C-T | 57   | chr17:71753350-71753450 |
| chr17 | 72061150 | 72061250 | 1065-Lng-B-T | 39   | chr17:72061150-72061250 |
| chr17 | 72075050 | 72075150 | 1100-Lng-A-T | 83   | chr17:72075050-72075150 |
| chr17 | 72240650 | 72240750 | 846-Lng-A-T  | 53   | chr17:72240650-72240750 |
| chr17 | 72244250 | 72244350 | 1065-Lng-A-T | 434  | chr17:72244250-72244350 |
| chr17 | 72725750 | 72725850 | 1065-Lng-C-T | 66   | chr17:72725750-72725850 |
| chr17 | 72867150 | 72867250 | 1065-Lng-B-T | 101  | chr17:72867150-72867250 |
| chr17 | 72986550 | 72986650 | 1274-Lng-A-T | 59   | chr17:72986550-72986650 |
| chr17 | 73175850 | 73175950 | 1152-Lng-A-T | 56   | chr17:73175850-73175950 |
| chr17 | 73197850 | 73197950 | 1100-Lng-A-T | 54   | chr17:73197850-73197950 |
| chr17 | 73236350 | 73236450 | 901-Lng-C-T  | 113  | chr17:73236350-73236450 |
| chr17 | 73330250 | 73330350 | 1065-Lng-A-T | 47   | chr17:73330250-73330350 |
| chr17 | 73351750 | 73351850 | 1065-Lng-A-T | 41   | chr17:73351750-73351850 |
| chr17 | 73364650 | 73364750 | 1072-Lng-A-T | 58   | chr17:73364650-73364750 |
| chr17 | 73428850 | 73428950 | 901-Lng-D-T  | 108  | chr17:73428850-73428950 |
| chr17 | 73862350 | 73862450 | 901-Lng-D-T  | 62   | chr17:73862350-73862450 |
| chr17 | 74077250 | 74077350 | 1090-Lng-A-T | 54   | chr17:74077250-74077350 |
| chr17 | 74243850 | 74243950 | 1100-Lng-A-T | 51   | chr17:74243850-74243950 |
| chr17 | 74491850 | 74491950 | 1065-Lng-B-T | 41   | chr17:74491850-74491950 |
| chr17 | 74621250 | 74621350 | 1072-Lng-A-T | 49   | chr17:74621250-74621350 |
| chr17 | 74632950 | 74633050 | 1090-Lng-A-T | 88   | chr17:74632950-74633050 |
| chr17 | 74636350 | 74636450 | 1065-Lng-A-T | 75   | chr17:74636350-74636450 |
| chr17 | 74668050 | 74668150 | 1274-Lng-A-T | 54   | chr17:74668050-74668150 |
| chr17 | 74692850 | 74692950 | 846-Lng-A-T  | 105  | chr17:74692850-74692950 |
| chr17 | 74739750 | 74739850 | 1152-Lng-A-T | 36   | chr17:74739750-74739850 |
| chr17 | 74761250 | 74761350 | 1090-Lng-A-T | 46   | chr17:74761250-74761350 |
| chr17 | 74957250 | 74957350 | 846-Lng-A-T  | 2744 | chr17:74957250-74957350 |
| chr17 | 75001850 | 75001950 | 1152-Lng-A-T | 185  | chr17:75001850-75001950 |
| chr17 | 75014550 | 75014650 | 1065-Lng-C-T | 98   | chr17:75014550-75014650 |
| chr17 | 75022850 | 75022950 | 1072-Lng-A-T | 220  | chr17:75022850-75022950 |
| chr17 | 75066750 | 75066850 | 1100-Lng-A-T | 53   | chr17:75066750-75066850 |
| chr17 | 75069950 | 75070050 | 1004-Lng-A-T | 74   | chr17:75069950-75070050 |
| chr17 | 75070450 | 75070550 | 901-Lng-A-T  | 146  | chr17:75070450-75070550 |
| chr17 | 75099550 | 75099650 | 846-Lng-A-T  | 137  | chr17:75099550-75099650 |
| chr17 | 75113650 | 75113750 | 1090-Lng-A-T | 83   | chr17:75113650-75113750 |

**Table S2: SB Insertion regions**

|       |          |          |              |     |                         |
|-------|----------|----------|--------------|-----|-------------------------|
| chr17 | 75351450 | 75351550 | 1100-Lng-A-T | 55  | chr17:75351450-75351550 |
| chr17 | 75616750 | 75616850 | 1065-Lng-B-T | 55  | chr17:75616750-75616850 |
| chr17 | 75664350 | 75664450 | 901-Lng-A-T  | 77  | chr17:75664350-75664450 |
| chr17 | 75664950 | 75665050 | 901-Lng-C-T  | 235 | chr17:75664950-75665050 |
| chr17 | 76147050 | 76147150 | 1100-Lng-A-T | 57  | chr17:76147050-76147150 |
| chr17 | 76402550 | 76402650 | 1274-Lng-A-T | 55  | chr17:76402550-76402650 |
| chr17 | 77116850 | 77116950 | 1065-Lng-A-T | 66  | chr17:77116850-77116950 |
| chr17 | 77187650 | 77187750 | 1152-Lng-A-T | 89  | chr17:77187650-77187750 |
| chr17 | 77219050 | 77219150 | 901-Lng-C-T  | 39  | chr17:77219050-77219150 |
| chr17 | 77229050 | 77229150 | 1167-Lng-A-T | 87  | chr17:77229050-77229150 |
| chr17 | 77369350 | 77369450 | 1065-Lng-A-T | 87  | chr17:77369350-77369450 |
| chr17 | 77478350 | 77478450 | 1100-Lng-A-T | 149 | chr17:77478350-77478450 |
| chr17 | 77675550 | 77675650 | 901-Lng-B-T  | 105 | chr17:77675550-77675650 |
| chr17 | 77715550 | 77715650 | 1274-Lng-A-T | 53  | chr17:77715550-77715650 |
| chr17 | 77889350 | 77889450 | 1090-Lng-A-T | 80  | chr17:77889350-77889450 |
| chr17 | 77950150 | 77950250 | 1090-Lng-A-T | 82  | chr17:77950150-77950250 |
| chr17 | 77995950 | 77996050 | 1274-Lng-A-T | 187 | chr17:77995950-77996050 |
| chr17 | 78166950 | 78167050 | 1065-Lng-A-T | 52  | chr17:78166950-78167050 |
| chr17 | 78262550 | 78262650 | 1090-Lng-A-T | 70  | chr17:78262550-78262650 |
| chr17 | 78547450 | 78547550 | 1090-Lng-A-T | 151 | chr17:78547450-78547550 |
| chr17 | 78672150 | 78672250 | 1090-Lng-A-T | 88  | chr17:78672150-78672250 |
| chr17 | 78711250 | 78711350 | 901-Lng-D-T  | 368 | chr17:78711250-78711350 |
| chr17 | 78962850 | 78962950 | 1004-Lng-A-T | 83  | chr17:78962850-78962950 |
| chr17 | 79053150 | 79053250 | 1188-Lng-A-T | 38  | chr17:79053150-79053250 |
| chr17 | 79113850 | 79113950 | 1100-Lng-A-T | 105 | chr17:79113850-79113950 |
| chr17 | 79124650 | 79124750 | 1223-Lng-C-T | 54  | chr17:79124650-79124750 |
| chr17 | 79462950 | 79463050 | 1274-Lng-A-T | 209 | chr17:79462950-79463050 |
| chr17 | 79493150 | 79493250 | 1100-Lng-A-T | 278 | chr17:79493150-79493250 |
| chr17 | 79538650 | 79538750 | 1223-Lng-C-T | 45  | chr17:79538650-79538750 |
| chr17 | 79582750 | 79582850 | 1167-Lng-A-T | 71  | chr17:79582750-79582850 |
| chr17 | 79725450 | 79725550 | 1065-Lng-B-T | 58  | chr17:79725450-79725550 |
| chr17 | 79995650 | 79995750 | 1090-Lng-A-T | 53  | chr17:79995650-79995750 |
| chr17 | 80116350 | 80116450 | 901-Lng-B-T  | 58  | chr17:80116350-80116450 |
| chr17 | 80262350 | 80262450 | 1090-Lng-A-T | 46  | chr17:80262350-80262450 |
| chr17 | 80275750 | 80275850 | 1188-Lng-A-T | 268 | chr17:80275750-80275850 |
| chr17 | 80280850 | 80280950 | 1274-Lng-A-T | 144 | chr17:80280850-80280950 |
| chr17 | 80285650 | 80285750 | 1274-Lng-A-T | 137 | chr17:80285650-80285750 |
| chr17 | 80421550 | 80421650 | 1090-Lng-A-T | 54  | chr17:80421550-80421650 |
| chr17 | 80425850 | 80425950 | 1100-Lng-A-T | 74  | chr17:80425850-80425950 |
| chr17 | 80438650 | 80438750 | 1072-Lng-A-T | 55  | chr17:80438650-80438750 |
| chr17 | 80438950 | 80439050 | 1223-Lng-B-T | 211 | chr17:80438950-80439050 |
| chr17 | 80454350 | 80454450 | 846-Lng-A-T  | 161 | chr17:80454350-80454450 |
| chr17 | 80536350 | 80536450 | 1072-Lng-A-T | 51  | chr17:80536350-80536450 |
| chr17 | 80597150 | 80597250 | 846-Lng-A-T  | 848 | chr17:80597150-80597250 |
| chr17 | 80599450 | 80599550 | 1274-Lng-A-T | 99  | chr17:80599450-80599550 |
| chr17 | 80667750 | 80667850 | 901-Lng-C-T  | 178 | chr17:80667750-80667850 |

**Table S2: SB Insertion regions**

|       |          |          |              |     |                         |
|-------|----------|----------|--------------|-----|-------------------------|
| chr17 | 80996650 | 80996750 | 1223-Lng-C-T | 49  | chr17:80996650-80996750 |
| chr17 | 81005550 | 81005650 | 1090-Lng-B-T | 477 | chr17:81005550-81005650 |
| chr17 | 81008450 | 81008550 | 1100-Lng-A-T | 59  | chr17:81008450-81008550 |
| chr17 | 81021550 | 81021650 | 1167-Lng-A-T | 85  | chr17:81021550-81021650 |
| chr17 | 81036450 | 81036550 | 901-Lng-B-T  | 246 | chr17:81036450-81036550 |
| chr17 | 81038650 | 81038750 | 901-Lng-D-T  | 95  | chr17:81038650-81038750 |
| chr17 | 81063050 | 81063150 | 901-Lng-A-T  | 227 | chr17:81063050-81063150 |
| chr17 | 81075950 | 81076050 | 901-Lng-A-T  | 123 | chr17:81075950-81076050 |
| chr17 | 81087450 | 81087550 | 1072-Lng-A-T | 73  | chr17:81087450-81087550 |
| chr17 | 81102850 | 81102950 | 1151-Lng-A-T | 222 | chr17:81102850-81102950 |
| chr17 | 81107250 | 81107350 | 1274-Lng-A-T | 151 | chr17:81107250-81107350 |
| chr17 | 81311250 | 81311350 | 1223-Lng-B-T | 64  | chr17:81311250-81311350 |
| chr17 | 81363850 | 81363950 | 1223-Lng-B-T | 35  | chr17:81363850-81363950 |
| chr17 | 81490950 | 81491050 | 1065-Lng-C-T | 69  | chr17:81490950-81491050 |
| chr17 | 81708150 | 81708250 | 1223-Lng-D-T | 43  | chr17:81708150-81708250 |
| chr17 | 81935450 | 81935550 | 1223-Lng-B-T | 83  | chr17:81935450-81935550 |
| chr17 | 82063650 | 82063750 | 1065-Lng-C-T | 96  | chr17:82063650-82063750 |
| chr17 | 82125950 | 82126050 | 1152-Lng-A-T | 139 | chr17:82125950-82126050 |
| chr17 | 82643150 | 82643250 | 1152-Lng-A-T | 150 | chr17:82643150-82643250 |
| chr17 | 82895550 | 82895650 | 1072-Lng-A-T | 250 | chr17:82895550-82895650 |
| chr17 | 82944650 | 82944750 | 1090-Lng-A-T | 47  | chr17:82944650-82944750 |
| chr17 | 83449350 | 83449450 | 1065-Lng-C-T | 61  | chr17:83449350-83449450 |
| chr17 | 83606550 | 83606650 | 1151-Lng-A-T | 118 | chr17:83606550-83606650 |
| chr17 | 83728650 | 83728750 | 1151-Lng-A-T | 76  | chr17:83728650-83728750 |
| chr17 | 83764950 | 83765050 | 1065-Lng-A-T | 76  | chr17:83764950-83765050 |
| chr17 | 83768750 | 83768850 | 1090-Lng-B-T | 607 | chr17:83768750-83768850 |
| chr17 | 83781850 | 83781950 | 1100-Lng-B-T | 57  | chr17:83781850-83781950 |
| chr17 | 83788350 | 83788450 | 901-Lng-D-T  | 148 | chr17:83788350-83788450 |
| chr17 | 83801150 | 83801250 | 1151-Lng-A-T | 71  | chr17:83801150-83801250 |
| chr17 | 83804750 | 83804850 | 1223-Lng-A-T | 131 | chr17:83804750-83804850 |
| chr17 | 83861550 | 83861650 | 1090-Lng-B-T | 85  | chr17:83861550-83861650 |
| chr17 | 83882950 | 83883050 | 1223-Lng-A-T | 134 | chr17:83882950-83883050 |
| chr17 | 84281750 | 84281850 | 1065-Lng-C-T | 65  | chr17:84281750-84281850 |
| chr17 | 84487350 | 84487450 | 1151-Lng-A-T | 55  | chr17:84487350-84487450 |
| chr17 | 84627950 | 84628050 | 901-Lng-C-T  | 55  | chr17:84627950-84628050 |
| chr17 | 84769750 | 84769850 | 1223-Lng-A-T | 313 | chr17:84769750-84769850 |
| chr17 | 84770550 | 84770650 | 1090-Lng-A-T | 98  | chr17:84770550-84770650 |
| chr17 | 84779850 | 84779950 | 1065-Lng-A-T | 517 | chr17:84779850-84779950 |
| chr17 | 84785550 | 84785650 | 901-Lng-A-T  | 79  | chr17:84785550-84785650 |
| chr17 | 84823650 | 84823750 | 1274-Lng-A-T | 71  | chr17:84823650-84823750 |
| chr17 | 84831050 | 84831150 | 1223-Lng-D-T | 53  | chr17:84831050-84831150 |
| chr17 | 85033750 | 85033850 | 1065-Lng-B-T | 58  | chr17:85033750-85033850 |
| chr17 | 85108850 | 85108950 | 901-Lng-D-T  | 60  | chr17:85108850-85108950 |
| chr17 | 85358350 | 85358450 | 1223-Lng-A-T | 226 | chr17:85358350-85358450 |
| chr17 | 85361250 | 85361350 | 1065-Lng-B-T | 93  | chr17:85361250-85361350 |
| chr17 | 85361250 | 85361350 | 901-Lng-B-T  | 267 | chr17:85361250-85361350 |

**Table S2: SB Insertion regions**

|       |          |          |              |      |                         |
|-------|----------|----------|--------------|------|-------------------------|
| chr17 | 85382350 | 85382450 | 1100-Lng-A-T | 64   | chr17:85382350-85382450 |
| chr17 | 85848850 | 85848950 | 1152-Lng-A-T | 53   | chr17:85848850-85848950 |
| chr17 | 85880350 | 85880450 | 1065-Lng-A-T | 35   | chr17:85880350-85880450 |
| chr17 | 86006150 | 86006250 | 1072-Lng-A-T | 50   | chr17:86006150-86006250 |
| chr17 | 86593350 | 86593450 | 1274-Lng-A-T | 186  | chr17:86593350-86593450 |
| chr17 | 86660550 | 86660650 | 1152-Lng-A-T | 96   | chr17:86660550-86660650 |
| chr17 | 86668650 | 86668750 | 1065-Lng-A-T | 46   | chr17:86668650-86668750 |
| chr17 | 86775950 | 86776050 | 1065-Lng-A-T | 232  | chr17:86775950-86776050 |
| chr17 | 87003550 | 87003650 | 1065-Lng-B-T | 59   | chr17:87003550-87003650 |
| chr17 | 87173650 | 87173750 | 1151-Lng-A-T | 58   | chr17:87173650-87173750 |
| chr17 | 87174750 | 87174850 | 1100-Lng-A-T | 89   | chr17:87174750-87174850 |
| chr17 | 87191950 | 87192050 | 1100-Lng-A-T | 51   | chr17:87191950-87192050 |
| chr17 | 87210350 | 87210450 | 901-Lng-C-T  | 102  | chr17:87210350-87210450 |
| chr17 | 87311550 | 87311650 | 901-Lng-A-T  | 95   | chr17:87311550-87311650 |
| chr17 | 87336450 | 87336550 | 1223-Lng-D-T | 40   | chr17:87336450-87336550 |
| chr17 | 87380550 | 87380650 | 1151-Lng-A-T | 623  | chr17:87380550-87380650 |
| chr17 | 87388650 | 87388750 | 1188-Lng-A-T | 138  | chr17:87388650-87388750 |
| chr17 | 87402550 | 87402650 | 1090-Lng-A-T | 112  | chr17:87402550-87402650 |
| chr17 | 87430250 | 87430350 | 1065-Lng-B-T | 70   | chr17:87430250-87430350 |
| chr17 | 87679750 | 87679850 | 1167-Lng-A-T | 62   | chr17:87679750-87679850 |
| chr17 | 87767750 | 87767850 | 1090-Lng-B-T | 156  | chr17:87767750-87767850 |
| chr17 | 87801350 | 87801450 | 1072-Lng-A-T | 60   | chr17:87801350-87801450 |
| chr17 | 87843450 | 87843550 | 1188-Lng-A-T | 53   | chr17:87843450-87843550 |
| chr17 | 87884550 | 87884650 | 1151-Lng-A-T | 82   | chr17:87884550-87884650 |
| chr17 | 87924050 | 87924150 | 1188-Lng-A-T | 62   | chr17:87924050-87924150 |
| chr17 | 88443950 | 88444050 | 1100-Lng-A-T | 101  | chr17:88443950-88444050 |
| chr17 | 88458150 | 88458250 | 1100-Lng-B-T | 63   | chr17:88458150-88458250 |
| chr17 | 88462950 | 88463050 | 1090-Lng-A-T | 965  | chr17:88462950-88463050 |
| chr17 | 88498750 | 88498850 | 1065-Lng-C-T | 72   | chr17:88498750-88498850 |
| chr17 | 88531150 | 88531250 | 1223-Lng-A-T | 165  | chr17:88531150-88531250 |
| chr17 | 88555050 | 88555150 | 1072-Lng-A-T | 81   | chr17:88555050-88555150 |
| chr17 | 88813250 | 88813350 | 901-Lng-B-T  | 35   | chr17:88813250-88813350 |
| chr17 | 88845950 | 88846050 | 1223-Lng-A-T | 2203 | chr17:88845950-88846050 |
| chr17 | 88946150 | 88946250 | 846-Lng-A-T  | 50   | chr17:88946150-88946250 |
| chr17 | 88981450 | 88981550 | 1188-Lng-A-T | 108  | chr17:88981450-88981550 |
| chr17 | 89386550 | 89386650 | 901-Lng-C-T  | 279  | chr17:89386550-89386650 |
| chr17 | 89441250 | 89441350 | 1152-Lng-A-T | 69   | chr17:89441250-89441350 |
| chr17 | 89488750 | 89488850 | 1065-Lng-A-T | 55   | chr17:89488750-89488850 |
| chr17 | 89539750 | 89539850 | 1065-Lng-A-T | 49   | chr17:89539750-89539850 |
| chr17 | 89746650 | 89746750 | 901-Lng-A-T  | 70   | chr17:89746650-89746750 |
| chr17 | 89963550 | 89963650 | 1004-Lng-A-T | 64   | chr17:89963550-89963650 |
| chr17 | 89980750 | 89980850 | 1065-Lng-A-T | 65   | chr17:89980750-89980850 |
| chr17 | 90035250 | 90035350 | 901-Lng-B-T  | 200  | chr17:90035250-90035350 |
| chr17 | 90131550 | 90131650 | 1065-Lng-B-T | 52   | chr17:90131550-90131650 |
| chr17 | 90205050 | 90205150 | 1223-Lng-A-T | 361  | chr17:90205050-90205150 |
| chr17 | 90351650 | 90351750 | 1065-Lng-A-T | 137  | chr17:90351650-90351750 |

**Table S2: SB Insertion regions**

|       |          |          |              |     |                         |
|-------|----------|----------|--------------|-----|-------------------------|
| chr17 | 90415250 | 90415350 | 1090-Lng-A-T | 47  | chr17:90415250-90415350 |
| chr17 | 90444750 | 90444850 | 1090-Lng-A-T | 50  | chr17:90444750-90444850 |
| chr17 | 90468950 | 90469050 | 1090-Lng-B-T | 863 | chr17:90468950-90469050 |
| chr17 | 90551750 | 90551850 | 901-Lng-B-T  | 297 | chr17:90551750-90551850 |
| chr17 | 90563450 | 90563550 | 1223-Lng-D-T | 47  | chr17:90563450-90563550 |
| chr17 | 90620150 | 90620250 | 901-Lng-B-T  | 146 | chr17:90620150-90620250 |
| chr17 | 90634450 | 90634550 | 1065-Lng-A-T | 100 | chr17:90634450-90634550 |
| chr17 | 90657450 | 90657550 | 1100-Lng-B-T | 61  | chr17:90657450-90657550 |
| chr17 | 90770550 | 90770650 | 1100-Lng-B-T | 118 | chr17:90770550-90770650 |
| chr17 | 90788450 | 90788550 | 901-Lng-B-T  | 129 | chr17:90788450-90788550 |
| chr17 | 90790950 | 90791050 | 1223-Lng-C-T | 63  | chr17:90790950-90791050 |
| chr17 | 90834250 | 90834350 | 901-Lng-A-T  | 110 | chr17:90834250-90834350 |
| chr17 | 90997750 | 90997850 | 1065-Lng-B-T | 45  | chr17:90997750-90997850 |
| chr17 | 91004650 | 91004750 | 1152-Lng-A-T | 46  | chr17:91004650-91004750 |
| chr17 | 91028850 | 91028950 | 1188-Lng-A-T | 117 | chr17:91028850-91028950 |
| chr17 | 91035950 | 91036050 | 901-Lng-C-T  | 33  | chr17:91035950-91036050 |
| chr17 | 91097850 | 91097950 | 1065-Lng-A-T | 105 | chr17:91097850-91097950 |
| chr17 | 91111650 | 91111750 | 846-Lng-A-T  | 170 | chr17:91111650-91111750 |
| chr17 | 91130050 | 91130150 | 901-Lng-C-T  | 47  | chr17:91130050-91130150 |
| chr17 | 91182250 | 91182350 | 901-Lng-C-T  | 97  | chr17:91182250-91182350 |
| chr17 | 91212950 | 91213050 | 1167-Lng-A-T | 76  | chr17:91212950-91213050 |
| chr17 | 91250850 | 91250950 | 1151-Lng-A-T | 78  | chr17:91250850-91250950 |
| chr17 | 91285350 | 91285450 | 1167-Lng-A-T | 156 | chr17:91285350-91285450 |
| chr17 | 91299250 | 91299350 | 1090-Lng-B-T | 89  | chr17:91299250-91299350 |
| chr17 | 91373350 | 91373450 | 1152-Lng-A-T | 414 | chr17:91373350-91373450 |
| chr17 | 91564450 | 91564550 | 1274-Lng-A-T | 157 | chr17:91564450-91564550 |
| chr17 | 91882750 | 91882850 | 901-Lng-A-T  | 100 | chr17:91882750-91882850 |
| chr17 | 91885150 | 91885250 | 1223-Lng-C-T | 53  | chr17:91885150-91885250 |
| chr17 | 92021150 | 92021250 | 1004-Lng-A-T | 56  | chr17:92021150-92021250 |
| chr17 | 92195450 | 92195550 | 1090-Lng-A-T | 117 | chr17:92195450-92195550 |
| chr17 | 92296850 | 92296950 | 1223-Lng-A-T | 153 | chr17:92296850-92296950 |
| chr17 | 92769250 | 92769350 | 901-Lng-B-T  | 277 | chr17:92769250-92769350 |
| chr17 | 92929850 | 92929950 | 1152-Lng-A-T | 39  | chr17:92929850-92929950 |
| chr17 | 93347950 | 93348050 | 1151-Lng-A-T | 251 | chr17:93347950-93348050 |
| chr17 | 93369650 | 93369750 | 1274-Lng-A-T | 148 | chr17:93369650-93369750 |
| chr17 | 93672550 | 93672650 | 901-Lng-D-T  | 246 | chr17:93672550-93672650 |
| chr17 | 93708450 | 93708550 | 901-Lng-B-T  | 201 | chr17:93708450-93708550 |
| chr17 | 93725950 | 93726050 | 901-Lng-B-T  | 196 | chr17:93725950-93726050 |
| chr17 | 93865750 | 93865850 | 1274-Lng-A-T | 51  | chr17:93865750-93865850 |
| chr17 | 94005350 | 94005450 | 1188-Lng-A-T | 46  | chr17:94005350-94005450 |
| chr17 | 94029450 | 94029550 | 1223-Lng-A-T | 106 | chr17:94029450-94029550 |
| chr17 | 94060050 | 94060150 | 1223-Lng-B-T | 41  | chr17:94060050-94060150 |
| chr17 | 94213550 | 94213650 | 1223-Lng-A-T | 71  | chr17:94213550-94213650 |
| chr17 | 94452350 | 94452450 | 1223-Lng-B-T | 176 | chr17:94452350-94452450 |
| chr17 | 94487750 | 94487850 | 1151-Lng-A-T | 69  | chr17:94487750-94487850 |
| chr17 | 94895250 | 94895350 | 1223-Lng-B-T | 43  | chr17:94895250-94895350 |

**Table S2: SB Insertion regions**

|       |          |          |              |       |                         |
|-------|----------|----------|--------------|-------|-------------------------|
| chr17 | 94896050 | 94896150 | 1090-Lng-B-T | 471   | chr17:94896050-94896150 |
| chr17 | 94962550 | 94962650 | 846-Lng-A-T  | 93    | chr17:94962550-94962650 |
| chr17 | 95054550 | 95054650 | 1065-Lng-A-T | 34    | chr17:95054550-95054650 |
| chr17 | 95100150 | 95100250 | 901-Lng-B-T  | 163   | chr17:95100150-95100250 |
| chr17 | 95219350 | 95219450 | 1100-Lng-B-T | 67    | chr17:95219350-95219450 |
| chr17 | 95233250 | 95233350 | 1090-Lng-A-T | 83    | chr17:95233250-95233350 |
| chr18 | 3005750  | 3005850  | 1065-Lng-A-T | 46    | chr18:3005750-3005850   |
| chr18 | 3005850  | 3005950  | 846-Lng-A-T  | 444   | chr18:3005850-3005950   |
| chr18 | 3042050  | 3042150  | 901-Lng-B-T  | 262   | chr18:3042050-3042150   |
| chr18 | 3396250  | 3396350  | 1274-Lng-A-T | 56    | chr18:3396250-3396350   |
| chr18 | 3464450  | 3464550  | 1065-Lng-A-T | 59    | chr18:3464450-3464550   |
| chr18 | 3897850  | 3897950  | 1072-Lng-A-T | 49    | chr18:3897850-3897950   |
| chr18 | 3938150  | 3938250  | 1072-Lng-A-T | 55    | chr18:3938150-3938250   |
| chr18 | 3967150  | 3967250  | 901-Lng-A-T  | 51    | chr18:3967150-3967250   |
| chr18 | 4145550  | 4145650  | 1090-Lng-B-T | 230   | chr18:4145550-4145650   |
| chr18 | 4315950  | 4316050  | 1223-Lng-B-T | 1952  | chr18:4315950-4316050   |
| chr18 | 4332450  | 4332550  | 1223-Lng-B-T | 2592  | chr18:4332450-4332550   |
| chr18 | 4332450  | 4332550  | 1167-Lng-A-T | 15238 | chr18:4332450-4332550   |
| chr18 | 4332650  | 4332750  | 1223-Lng-C-T | 4276  | chr18:4332650-4332750   |
| chr18 | 4332750  | 4332850  | 1004-Lng-A-T | 13115 | chr18:4332750-4332850   |
| chr18 | 4332950  | 4333050  | 1223-Lng-D-T | 3486  | chr18:4332950-4333050   |
| chr18 | 4333150  | 4333250  | 1223-Lng-D-T | 74    | chr18:4333150-4333250   |
| chr18 | 4337150  | 4337250  | 1223-Lng-B-T | 84    | chr18:4337150-4337250   |
| chr18 | 4337750  | 4337850  | 1167-Lng-A-T | 74    | chr18:4337750-4337850   |
| chr18 | 4350550  | 4350650  | 1167-Lng-A-T | 65    | chr18:4350550-4350650   |
| chr18 | 4384650  | 4384750  | 1223-Lng-B-T | 151   | chr18:4384650-4384750   |
| chr18 | 4402950  | 4403050  | 1090-Lng-A-T | 56    | chr18:4402950-4403050   |
| chr18 | 4649950  | 4650050  | 1090-Lng-A-T | 949   | chr18:4649950-4650050   |
| chr18 | 4756150  | 4756250  | 1090-Lng-A-T | 100   | chr18:4756150-4756250   |
| chr18 | 4932950  | 4933050  | 1223-Lng-B-T | 35    | chr18:4932950-4933050   |
| chr18 | 4948150  | 4948250  | 1274-Lng-A-T | 51    | chr18:4948150-4948250   |
| chr18 | 4952550  | 4952650  | 1151-Lng-A-T | 67    | chr18:4952550-4952650   |
| chr18 | 4963450  | 4963550  | 1223-Lng-A-T | 76    | chr18:4963450-4963550   |
| chr18 | 4979950  | 4980050  | 1152-Lng-A-T | 99    | chr18:4979950-4980050   |
| chr18 | 5019650  | 5019750  | 1065-Lng-B-T | 199   | chr18:5019650-5019750   |
| chr18 | 5060550  | 5060650  | 1100-Lng-A-T | 110   | chr18:5060550-5060650   |
| chr18 | 5072650  | 5072750  | 1090-Lng-B-T | 548   | chr18:5072650-5072750   |
| chr18 | 5078450  | 5078550  | 1065-Lng-A-T | 35    | chr18:5078450-5078550   |
| chr18 | 5105950  | 5106050  | 1004-Lng-A-T | 56    | chr18:5105950-5106050   |
| chr18 | 5108350  | 5108450  | 901-Lng-D-T  | 141   | chr18:5108350-5108450   |
| chr18 | 5121050  | 5121150  | 1065-Lng-C-T | 65    | chr18:5121050-5121150   |
| chr18 | 5126950  | 5127050  | 1090-Lng-A-T | 778   | chr18:5126950-5127050   |
| chr18 | 5132150  | 5132250  | 1223-Lng-A-T | 1495  | chr18:5132150-5132250   |
| chr18 | 5242450  | 5242550  | 1065-Lng-B-T | 87    | chr18:5242450-5242550   |
| chr18 | 5244050  | 5244150  | 1072-Lng-A-T | 179   | chr18:5244050-5244150   |
| chr18 | 5303450  | 5303550  | 846-Lng-A-T  | 89    | chr18:5303450-5303550   |

**Table S2: SB Insertion regions**

|       |         |         |              |     |                       |
|-------|---------|---------|--------------|-----|-----------------------|
| chr18 | 5630850 | 5630950 | 1188-Lng-A-T | 37  | chr18:5630850-5630950 |
| chr18 | 5639550 | 5639650 | 1223-Lng-C-T | 174 | chr18:5639550-5639650 |
| chr18 | 5669050 | 5669150 | 901-Lng-C-T  | 41  | chr18:5669050-5669150 |
| chr18 | 6059450 | 6059550 | 1090-Lng-B-T | 973 | chr18:6059450-6059550 |
| chr18 | 6074750 | 6074850 | 1065-Lng-A-T | 43  | chr18:6074750-6074850 |
| chr18 | 6117650 | 6117750 | 1274-Lng-A-T | 67  | chr18:6117650-6117750 |
| chr18 | 6128650 | 6128750 | 1151-Lng-A-T | 67  | chr18:6128650-6128750 |
| chr18 | 6197450 | 6197550 | 1065-Lng-B-T | 129 | chr18:6197450-6197550 |
| chr18 | 6205750 | 6205850 | 1167-Lng-A-T | 47  | chr18:6205750-6205850 |
| chr18 | 6209150 | 6209250 | 1004-Lng-A-T | 70  | chr18:6209150-6209250 |
| chr18 | 6438850 | 6438950 | 1274-Lng-A-T | 225 | chr18:6438850-6438950 |
| chr18 | 6483650 | 6483750 | 1152-Lng-A-T | 254 | chr18:6483650-6483750 |
| chr18 | 6484850 | 6484950 | 901-Lng-D-T  | 156 | chr18:6484850-6484950 |
| chr18 | 6487450 | 6487550 | 1274-Lng-A-T | 169 | chr18:6487450-6487550 |
| chr18 | 6503550 | 6503650 | 901-Lng-D-T  | 277 | chr18:6503550-6503650 |
| chr18 | 6617750 | 6617850 | 1004-Lng-A-T | 124 | chr18:6617750-6617850 |
| chr18 | 6671250 | 6671350 | 1090-Lng-A-T | 73  | chr18:6671250-6671350 |
| chr18 | 6777750 | 6777850 | 1090-Lng-A-T | 99  | chr18:6777750-6777850 |
| chr18 | 6778250 | 6778350 | 1223-Lng-B-T | 49  | chr18:6778250-6778350 |
| chr18 | 6779250 | 6779350 | 901-Lng-B-T  | 37  | chr18:6779250-6779350 |
| chr18 | 6790550 | 6790650 | 1223-Lng-C-T | 45  | chr18:6790550-6790650 |
| chr18 | 6812350 | 6812450 | 1072-Lng-A-T | 55  | chr18:6812350-6812450 |
| chr18 | 6943350 | 6943450 | 1004-Lng-A-T | 68  | chr18:6943350-6943450 |
| chr18 | 7093650 | 7093750 | 1090-Lng-A-T | 53  | chr18:7093650-7093750 |
| chr18 | 7157250 | 7157350 | 1152-Lng-A-T | 44  | chr18:7157250-7157350 |
| chr18 | 7239850 | 7239950 | 1274-Lng-A-T | 94  | chr18:7239850-7239950 |
| chr18 | 7334050 | 7334150 | 846-Lng-A-T  | 106 | chr18:7334050-7334150 |
| chr18 | 7340350 | 7340450 | 1065-Lng-A-T | 41  | chr18:7340350-7340450 |
| chr18 | 7522550 | 7522650 | 901-Lng-A-T  | 284 | chr18:7522550-7522650 |
| chr18 | 7559750 | 7559850 | 901-Lng-C-T  | 53  | chr18:7559750-7559850 |
| chr18 | 7611150 | 7611250 | 1223-Lng-B-T | 37  | chr18:7611150-7611250 |
| chr18 | 7697850 | 7697950 | 1065-Lng-B-T | 47  | chr18:7697850-7697950 |
| chr18 | 7722650 | 7722750 | 901-Lng-D-T  | 118 | chr18:7722650-7722750 |
| chr18 | 7833650 | 7833750 | 1223-Lng-C-T | 52  | chr18:7833650-7833750 |
| chr18 | 7840450 | 7840550 | 1072-Lng-A-T | 60  | chr18:7840450-7840550 |
| chr18 | 7878950 | 7879050 | 1274-Lng-A-T | 66  | chr18:7878950-7879050 |
| chr18 | 7879150 | 7879250 | 1223-Lng-D-T | 49  | chr18:7879150-7879250 |
| chr18 | 7897050 | 7897150 | 1152-Lng-A-T | 35  | chr18:7897050-7897150 |
| chr18 | 7898250 | 7898350 | 901-Lng-C-T  | 205 | chr18:7898250-7898350 |
| chr18 | 7898550 | 7898650 | 1188-Lng-A-T | 48  | chr18:7898550-7898650 |
| chr18 | 7902450 | 7902550 | 1090-Lng-A-T | 113 | chr18:7902450-7902550 |
| chr18 | 7910350 | 7910450 | 1274-Lng-A-T | 56  | chr18:7910350-7910450 |
| chr18 | 7921550 | 7921650 | 901-Lng-A-T  | 57  | chr18:7921550-7921650 |
| chr18 | 7921750 | 7921850 | 1100-Lng-B-T | 60  | chr18:7921750-7921850 |
| chr18 | 7922850 | 7922950 | 1167-Lng-A-T | 125 | chr18:7922850-7922950 |
| chr18 | 7928350 | 7928450 | 1188-Lng-A-T | 63  | chr18:7928350-7928450 |

**Table S2: SB Insertion regions**

|       |          |          |              |      |                         |
|-------|----------|----------|--------------|------|-------------------------|
| chr18 | 7953350  | 7953450  | 1152-Lng-A-T | 112  | chr18:7953350-7953450   |
| chr18 | 8028050  | 8028150  | 1223-Lng-A-T | 1836 | chr18:8028050-8028150   |
| chr18 | 8028050  | 8028150  | 1223-Lng-A-T | 645  | chr18:8028050-8028150   |
| chr18 | 8103050  | 8103150  | 1152-Lng-A-T | 86   | chr18:8103050-8103150   |
| chr18 | 8370250  | 8370350  | 1152-Lng-A-T | 73   | chr18:8370250-8370350   |
| chr18 | 8385450  | 8385550  | 1151-Lng-A-T | 74   | chr18:8385450-8385550   |
| chr18 | 8823750  | 8823850  | 1100-Lng-A-T | 114  | chr18:8823750-8823850   |
| chr18 | 9085850  | 9085950  | 1151-Lng-A-T | 66   | chr18:9085850-9085950   |
| chr18 | 9090850  | 9090950  | 1223-Lng-C-T | 61   | chr18:9090850-9090950   |
| chr18 | 9313350  | 9313450  | 1090-Lng-A-T | 74   | chr18:9313350-9313450   |
| chr18 | 9330350  | 9330450  | 1151-Lng-A-T | 99   | chr18:9330350-9330450   |
| chr18 | 9331750  | 9331850  | 846-Lng-A-T  | 132  | chr18:9331750-9331850   |
| chr18 | 9350950  | 9351050  | 846-Lng-A-T  | 62   | chr18:9350950-9351050   |
| chr18 | 9351550  | 9351650  | 1004-Lng-A-T | 78   | chr18:9351550-9351650   |
| chr18 | 9389050  | 9389150  | 1151-Lng-A-T | 55   | chr18:9389050-9389150   |
| chr18 | 9433950  | 9434050  | 1072-Lng-A-T | 253  | chr18:9433950-9434050   |
| chr18 | 9436250  | 9436350  | 1072-Lng-A-T | 61   | chr18:9436250-9436350   |
| chr18 | 10000850 | 10000950 | 1167-Lng-A-T | 47   | chr18:10000850-10000950 |
| chr18 | 10051650 | 10051750 | 901-Lng-C-T  | 47   | chr18:10051650-10051750 |
| chr18 | 10070950 | 10071050 | 1072-Lng-A-T | 177  | chr18:10070950-10071050 |
| chr18 | 10090150 | 10090250 | 1223-Lng-D-T | 68   | chr18:10090150-10090250 |
| chr18 | 10091750 | 10091850 | 1274-Lng-A-T | 217  | chr18:10091750-10091850 |
| chr18 | 10121550 | 10121650 | 1188-Lng-A-T | 235  | chr18:10121550-10121650 |
| chr18 | 10123050 | 10123150 | 1004-Lng-A-T | 61   | chr18:10123050-10123150 |
| chr18 | 10126550 | 10126650 | 1151-Lng-A-T | 590  | chr18:10126550-10126650 |
| chr18 | 10126950 | 10127050 | 1151-Lng-A-T | 64   | chr18:10126950-10127050 |
| chr18 | 10127350 | 10127450 | 1223-Lng-B-T | 334  | chr18:10127350-10127450 |
| chr18 | 10130150 | 10130250 | 1090-Lng-A-T | 192  | chr18:10130150-10130250 |
| chr18 | 10136750 | 10136850 | 1065-Lng-C-T | 97   | chr18:10136750-10136850 |
| chr18 | 10148550 | 10148650 | 1223-Lng-D-T | 40   | chr18:10148550-10148650 |
| chr18 | 10191050 | 10191150 | 901-Lng-B-T  | 199  | chr18:10191050-10191150 |
| chr18 | 10193950 | 10194050 | 1065-Lng-A-T | 69   | chr18:10193950-10194050 |
| chr18 | 10438350 | 10438450 | 1223-Lng-A-T | 166  | chr18:10438350-10438450 |
| chr18 | 10509850 | 10509950 | 1274-Lng-A-T | 89   | chr18:10509850-10509950 |
| chr18 | 10549150 | 10549250 | 846-Lng-A-T  | 93   | chr18:10549150-10549250 |
| chr18 | 10596550 | 10596650 | 1072-Lng-A-T | 270  | chr18:10596550-10596650 |
| chr18 | 10602550 | 10602650 | 1152-Lng-A-T | 172  | chr18:10602550-10602650 |
| chr18 | 10641050 | 10641150 | 1100-Lng-A-T | 54   | chr18:10641050-10641150 |
| chr18 | 10741650 | 10741750 | 1065-Lng-A-T | 62   | chr18:10741650-10741750 |
| chr18 | 10742650 | 10742750 | 1188-Lng-A-T | 39   | chr18:10742650-10742750 |
| chr18 | 10750950 | 10751050 | 1090-Lng-A-T | 117  | chr18:10750950-10751050 |
| chr18 | 10853750 | 10853850 | 1188-Lng-A-T | 39   | chr18:10853750-10853850 |
| chr18 | 11074750 | 11074850 | 846-Lng-A-T  | 54   | chr18:11074750-11074850 |
| chr18 | 11144950 | 11145050 | 901-Lng-C-T  | 94   | chr18:11144950-11145050 |
| chr18 | 11595150 | 11595250 | 1065-Lng-B-T | 58   | chr18:11595150-11595250 |
| chr18 | 11683650 | 11683750 | 1188-Lng-A-T | 46   | chr18:11683650-11683750 |



**Table S2: SB Insertion regions**

|       |          |          |              |     |                         |
|-------|----------|----------|--------------|-----|-------------------------|
| chr18 | 11698450 | 11698550 | 1223-Lng-A-T | 110 | chr18:11698450-11698550 |
| chr18 | 11750650 | 11750750 | 1004-Lng-A-T | 54  | chr18:11750650-11750750 |
| chr18 | 11797150 | 11797250 | 1065-Lng-C-T | 89  | chr18:11797150-11797250 |
| chr18 | 11828950 | 11829050 | 901-Lng-A-T  | 181 | chr18:11828950-11829050 |
| chr18 | 11847950 | 11848050 | 1223-Lng-B-T | 126 | chr18:11847950-11848050 |
| chr18 | 12009150 | 12009250 | 1152-Lng-A-T | 244 | chr18:12009150-12009250 |
| chr18 | 12050350 | 12050450 | 1072-Lng-A-T | 70  | chr18:12050350-12050450 |
| chr18 | 12080350 | 12080450 | 1065-Lng-A-T | 100 | chr18:12080350-12080450 |
| chr18 | 12299050 | 12299150 | 1223-Lng-C-T | 54  | chr18:12299050-12299150 |
| chr18 | 12304750 | 12304850 | 1090-Lng-B-T | 500 | chr18:12304750-12304850 |
| chr18 | 12330750 | 12330850 | 1065-Lng-A-T | 508 | chr18:12330750-12330850 |
| chr18 | 12338050 | 12338150 | 1223-Lng-D-T | 100 | chr18:12338050-12338150 |
| chr18 | 12359950 | 12360050 | 1100-Lng-A-T | 97  | chr18:12359950-12360050 |
| chr18 | 12361450 | 12361550 | 1223-Lng-C-T | 259 | chr18:12361450-12361550 |
| chr18 | 12373850 | 12373950 | 1090-Lng-B-T | 477 | chr18:12373850-12373950 |
| chr18 | 12383050 | 12383150 | 1223-Lng-B-T | 35  | chr18:12383050-12383150 |
| chr18 | 12411350 | 12411450 | 1188-Lng-A-T | 42  | chr18:12411350-12411450 |
| chr18 | 12478950 | 12479050 | 901-Lng-B-T  | 78  | chr18:12478950-12479050 |
| chr18 | 12549650 | 12549750 | 846-Lng-A-T  | 132 | chr18:12549650-12549750 |
| chr18 | 12900250 | 12900350 | 1100-Lng-B-T | 157 | chr18:12900250-12900350 |
| chr18 | 12957450 | 12957550 | 901-Lng-A-T  | 89  | chr18:12957450-12957550 |
| chr18 | 12984650 | 12984750 | 1065-Lng-B-T | 42  | chr18:12984650-12984750 |
| chr18 | 12994450 | 12994550 | 1167-Lng-A-T | 88  | chr18:12994450-12994550 |
| chr18 | 13004650 | 13004750 | 1065-Lng-A-T | 39  | chr18:13004650-13004750 |
| chr18 | 13052050 | 13052150 | 901-Lng-D-T  | 282 | chr18:13052050-13052150 |
| chr18 | 13149150 | 13149250 | 1223-Lng-D-T | 40  | chr18:13149150-13149250 |
| chr18 | 13154950 | 13155050 | 901-Lng-B-T  | 165 | chr18:13154950-13155050 |
| chr18 | 13473950 | 13474050 | 1188-Lng-A-T | 71  | chr18:13473950-13474050 |
| chr18 | 13531550 | 13531650 | 1223-Lng-C-T | 48  | chr18:13531550-13531650 |
| chr18 | 13866250 | 13866350 | 1223-Lng-D-T | 45  | chr18:13866250-13866350 |
| chr18 | 14096150 | 14096250 | 1100-Lng-A-T | 133 | chr18:14096150-14096250 |
| chr18 | 14398250 | 14398350 | 1090-Lng-B-T | 123 | chr18:14398250-14398350 |
| chr18 | 14422550 | 14422650 | 1004-Lng-A-T | 103 | chr18:14422550-14422650 |
| chr18 | 14593150 | 14593250 | 1274-Lng-A-T | 55  | chr18:14593150-14593250 |
| chr18 | 14640050 | 14640150 | 1065-Lng-A-T | 61  | chr18:14640050-14640150 |
| chr18 | 14668150 | 14668250 | 1223-Lng-B-T | 35  | chr18:14668150-14668250 |
| chr18 | 14778850 | 14778950 | 1223-Lng-D-T | 45  | chr18:14778850-14778950 |
| chr18 | 14804950 | 14805050 | 1167-Lng-A-T | 63  | chr18:14804950-14805050 |
| chr18 | 14807150 | 14807250 | 1223-Lng-D-T | 70  | chr18:14807150-14807250 |
| chr18 | 14828750 | 14828850 | 901-Lng-A-T  | 56  | chr18:14828750-14828850 |
| chr18 | 14876850 | 14876950 | 1090-Lng-A-T | 77  | chr18:14876850-14876950 |
| chr18 | 14979050 | 14979150 | 901-Lng-A-T  | 98  | chr18:14979050-14979150 |
| chr18 | 14995050 | 14995150 | 1223-Lng-D-T | 43  | chr18:14995050-14995150 |
| chr18 | 15190350 | 15190450 | 1274-Lng-A-T | 155 | chr18:15190350-15190450 |
| chr18 | 15190350 | 15190450 | 1072-Lng-A-T | 52  | chr18:15190350-15190450 |
| chr18 | 15200750 | 15200850 | 1065-Lng-A-T | 84  | chr18:15200750-15200850 |

**Table S2: SB Insertion regions**

|       |          |          |              |     |                         |
|-------|----------|----------|--------------|-----|-------------------------|
| chr18 | 15218150 | 15218250 | 1065-Lng-C-T | 70  | chr18:15218150-15218250 |
| chr18 | 15274250 | 15274350 | 1188-Lng-A-T | 55  | chr18:15274250-15274350 |
| chr18 | 15364050 | 15364150 | 901-Lng-B-T  | 90  | chr18:15364050-15364150 |
| chr18 | 15732150 | 15732250 | 1065-Lng-B-T | 42  | chr18:15732150-15732250 |
| chr18 | 15841350 | 15841450 | 1151-Lng-A-T | 63  | chr18:15841350-15841450 |
| chr18 | 15920550 | 15920650 | 1152-Lng-A-T | 60  | chr18:15920550-15920650 |
| chr18 | 16042150 | 16042250 | 1188-Lng-A-T | 42  | chr18:16042150-16042250 |
| chr18 | 16161350 | 16161450 | 901-Lng-A-T  | 64  | chr18:16161350-16161450 |
| chr18 | 16225850 | 16225950 | 1167-Lng-A-T | 58  | chr18:16225850-16225950 |
| chr18 | 16440750 | 16440850 | 1065-Lng-B-T | 114 | chr18:16440750-16440850 |
| chr18 | 16464350 | 16464450 | 1223-Lng-A-T | 133 | chr18:16464350-16464450 |
| chr18 | 16552350 | 16552450 | 1065-Lng-B-T | 67  | chr18:16552350-16552450 |
| chr18 | 16807950 | 16808050 | 1065-Lng-A-T | 71  | chr18:16807950-16808050 |
| chr18 | 16834250 | 16834350 | 1065-Lng-A-T | 50  | chr18:16834250-16834350 |
| chr18 | 16951850 | 16951950 | 1004-Lng-A-T | 49  | chr18:16951850-16951950 |
| chr18 | 17728150 | 17728250 | 1065-Lng-B-T | 88  | chr18:17728150-17728250 |
| chr18 | 17842550 | 17842650 | 1188-Lng-A-T | 161 | chr18:17842550-17842650 |
| chr18 | 17967750 | 17967850 | 1188-Lng-A-T | 48  | chr18:17967750-17967850 |
| chr18 | 18183850 | 18183950 | 1004-Lng-A-T | 55  | chr18:18183850-18183950 |
| chr18 | 18326250 | 18326350 | 1223-Lng-B-T | 45  | chr18:18326250-18326350 |
| chr18 | 18444150 | 18444250 | 901-Lng-D-T  | 258 | chr18:18444150-18444250 |
| chr18 | 18509750 | 18509850 | 1274-Lng-A-T | 156 | chr18:18509750-18509850 |
| chr18 | 18539950 | 18540050 | 901-Lng-A-T  | 81  | chr18:18539950-18540050 |
| chr18 | 18649750 | 18649850 | 1274-Lng-A-T | 250 | chr18:18649750-18649850 |
| chr18 | 19023850 | 19023950 | 1065-Lng-B-T | 482 | chr18:19023850-19023950 |
| chr18 | 19086350 | 19086450 | 1152-Lng-A-T | 95  | chr18:19086350-19086450 |
| chr18 | 19240050 | 19240150 | 901-Lng-C-T  | 44  | chr18:19240050-19240150 |
| chr18 | 19285650 | 19285750 | 901-Lng-A-T  | 379 | chr18:19285650-19285750 |
| chr18 | 19388450 | 19388550 | 901-Lng-A-T  | 68  | chr18:19388450-19388550 |
| chr18 | 19612750 | 19612850 | 1274-Lng-A-T | 152 | chr18:19612750-19612850 |
| chr18 | 19737650 | 19737750 | 1151-Lng-A-T | 70  | chr18:19737650-19737750 |
| chr18 | 19760150 | 19760250 | 1223-Lng-B-T | 46  | chr18:19760150-19760250 |
| chr18 | 19812750 | 19812850 | 1072-Lng-A-T | 94  | chr18:19812750-19812850 |
| chr18 | 19936450 | 19936550 | 1223-Lng-C-T | 87  | chr18:19936450-19936550 |
| chr18 | 19962550 | 19962650 | 1100-Lng-A-T | 76  | chr18:19962550-19962650 |
| chr18 | 20055050 | 20055150 | 1072-Lng-A-T | 64  | chr18:20055050-20055150 |
| chr18 | 20490050 | 20490150 | 1223-Lng-C-T | 243 | chr18:20490050-20490150 |
| chr18 | 20500150 | 20500250 | 1223-Lng-C-T | 645 | chr18:20500150-20500250 |
| chr18 | 20583650 | 20583750 | 1223-Lng-B-T | 45  | chr18:20583650-20583750 |
| chr18 | 20714050 | 20714150 | 1188-Lng-A-T | 39  | chr18:20714050-20714150 |
| chr18 | 20725550 | 20725650 | 1072-Lng-A-T | 56  | chr18:20725550-20725650 |
| chr18 | 20725550 | 20725650 | 1065-Lng-A-T | 50  | chr18:20725550-20725650 |
| chr18 | 20998650 | 20998750 | 1274-Lng-A-T | 70  | chr18:20998650-20998750 |
| chr18 | 21001750 | 21001850 | 846-Lng-A-T  | 90  | chr18:21001750-21001850 |
| chr18 | 21013150 | 21013250 | 1065-Lng-B-T | 42  | chr18:21013150-21013250 |
| chr18 | 21026550 | 21026650 | 1090-Lng-A-T | 53  | chr18:21026550-21026650 |

**Table S2: SB Insertion regions**

|       |          |          |              |      |                         |
|-------|----------|----------|--------------|------|-------------------------|
| chr18 | 21028650 | 21028750 | 1223-Lng-B-T | 145  | chr18:21028650-21028750 |
| chr18 | 21209350 | 21209450 | 1223-Lng-A-T | 106  | chr18:21209350-21209450 |
| chr18 | 21283250 | 21283350 | 1004-Lng-A-T | 49   | chr18:21283250-21283350 |
| chr18 | 21346350 | 21346450 | 1223-Lng-A-T | 389  | chr18:21346350-21346450 |
| chr18 | 21374750 | 21374850 | 1223-Lng-D-T | 48   | chr18:21374750-21374850 |
| chr18 | 21394250 | 21394350 | 1004-Lng-A-T | 51   | chr18:21394250-21394350 |
| chr18 | 21415350 | 21415450 | 1151-Lng-A-T | 161  | chr18:21415350-21415450 |
| chr18 | 21417550 | 21417650 | 1065-Lng-C-T | 99   | chr18:21417550-21417650 |
| chr18 | 21547150 | 21547250 | 901-Lng-B-T  | 161  | chr18:21547150-21547250 |
| chr18 | 21723750 | 21723850 | 1065-Lng-B-T | 68   | chr18:21723750-21723850 |
| chr18 | 21777750 | 21777850 | 1223-Lng-A-T | 61   | chr18:21777750-21777850 |
| chr18 | 22116150 | 22116250 | 901-Lng-A-T  | 78   | chr18:22116150-22116250 |
| chr18 | 22141550 | 22141650 | 1090-Lng-A-T | 50   | chr18:22141550-22141650 |
| chr18 | 22163750 | 22163850 | 901-Lng-C-T  | 71   | chr18:22163750-22163850 |
| chr18 | 22348050 | 22348150 | 1065-Lng-C-T | 87   | chr18:22348050-22348150 |
| chr18 | 22353650 | 22353750 | 1072-Lng-A-T | 61   | chr18:22353650-22353750 |
| chr18 | 22823650 | 22823750 | 1152-Lng-A-T | 70   | chr18:22823650-22823750 |
| chr18 | 22831350 | 22831450 | 901-Lng-C-T  | 135  | chr18:22831350-22831450 |
| chr18 | 23072950 | 23073050 | 901-Lng-C-T  | 90   | chr18:23072950-23073050 |
| chr18 | 23186550 | 23186650 | 1223-Lng-B-T | 41   | chr18:23186550-23186650 |
| chr18 | 23279550 | 23279650 | 1065-Lng-A-T | 74   | chr18:23279550-23279650 |
| chr18 | 23334650 | 23334750 | 1065-Lng-C-T | 111  | chr18:23334650-23334750 |
| chr18 | 23469650 | 23469750 | 901-Lng-A-T  | 77   | chr18:23469650-23469750 |
| chr18 | 23584050 | 23584150 | 1223-Lng-C-T | 3195 | chr18:23584050-23584150 |
| chr18 | 23584950 | 23585050 | 1090-Lng-A-T | 69   | chr18:23584950-23585050 |
| chr18 | 23594750 | 23594850 | 1188-Lng-A-T | 34   | chr18:23594750-23594850 |
| chr18 | 23633750 | 23633850 | 1223-Lng-B-T | 51   | chr18:23633750-23633850 |
| chr18 | 23674250 | 23674350 | 901-Lng-D-T  | 210  | chr18:23674250-23674350 |
| chr18 | 23738450 | 23738550 | 1151-Lng-A-T | 229  | chr18:23738450-23738550 |
| chr18 | 23760250 | 23760350 | 1004-Lng-A-T | 56   | chr18:23760250-23760350 |
| chr18 | 23801750 | 23801850 | 901-Lng-C-T  | 33   | chr18:23801750-23801850 |
| chr18 | 23905550 | 23905650 | 1004-Lng-A-T | 70   | chr18:23905550-23905650 |
| chr18 | 23935450 | 23935550 | 1090-Lng-A-T | 109  | chr18:23935450-23935550 |
| chr18 | 23987250 | 23987350 | 1065-Lng-A-T | 283  | chr18:23987250-23987350 |
| chr18 | 24052550 | 24052650 | 1065-Lng-A-T | 64   | chr18:24052550-24052650 |
| chr18 | 24390250 | 24390350 | 1274-Lng-A-T | 74   | chr18:24390250-24390350 |
| chr18 | 24609450 | 24609550 | 1223-Lng-B-T | 205  | chr18:24609450-24609550 |
| chr18 | 24632550 | 24632650 | 846-Lng-A-T  | 63   | chr18:24632550-24632650 |
| chr18 | 25361750 | 25361850 | 901-Lng-C-T  | 41   | chr18:25361750-25361850 |
| chr18 | 25420550 | 25420650 | 1065-Lng-B-T | 43   | chr18:25420550-25420650 |
| chr18 | 25440950 | 25441050 | 1090-Lng-A-T | 62   | chr18:25440950-25441050 |
| chr18 | 25546150 | 25546250 | 1223-Lng-B-T | 87   | chr18:25546150-25546250 |
| chr18 | 25601050 | 25601150 | 1065-Lng-C-T | 100  | chr18:25601050-25601150 |
| chr18 | 25607850 | 25607950 | 1223-Lng-A-T | 91   | chr18:25607850-25607950 |
| chr18 | 25617250 | 25617350 | 1090-Lng-A-T | 62   | chr18:25617250-25617350 |
| chr18 | 25655850 | 25655950 | 1167-Lng-A-T | 100  | chr18:25655850-25655950 |

**Table S2: SB Insertion regions**

|       |          |          |              |     |                         |
|-------|----------|----------|--------------|-----|-------------------------|
| chr18 | 25880350 | 25880450 | 1223-Lng-D-T | 56  | chr18:25880350-25880450 |
| chr18 | 25960950 | 25961050 | 1151-Lng-A-T | 54  | chr18:25960950-25961050 |
| chr18 | 26155650 | 26155750 | 1223-Lng-B-T | 43  | chr18:26155650-26155750 |
| chr18 | 26585150 | 26585250 | 846-Lng-A-T  | 55  | chr18:26585150-26585250 |
| chr18 | 26591650 | 26591750 | 1223-Lng-C-T | 51  | chr18:26591650-26591750 |
| chr18 | 26754550 | 26754650 | 846-Lng-A-T  | 70  | chr18:26754550-26754650 |
| chr18 | 26774450 | 26774550 | 1065-Lng-A-T | 66  | chr18:26774450-26774550 |
| chr18 | 27063750 | 27063850 | 1090-Lng-A-T | 66  | chr18:27063750-27063850 |
| chr18 | 27075250 | 27075350 | 1100-Lng-A-T | 130 | chr18:27075250-27075350 |
| chr18 | 27137650 | 27137750 | 1223-Lng-B-T | 38  | chr18:27137650-27137750 |
| chr18 | 27412650 | 27412750 | 901-Lng-B-T  | 245 | chr18:27412650-27412750 |
| chr18 | 27530250 | 27530350 | 1072-Lng-A-T | 61  | chr18:27530250-27530350 |
| chr18 | 27570250 | 27570350 | 846-Lng-A-T  | 147 | chr18:27570250-27570350 |
| chr18 | 27669850 | 27669950 | 1152-Lng-A-T | 35  | chr18:27669850-27669950 |
| chr18 | 27780150 | 27780250 | 1090-Lng-A-T | 93  | chr18:27780150-27780250 |
| chr18 | 27822150 | 27822250 | 901-Lng-B-T  | 106 | chr18:27822150-27822250 |
| chr18 | 27822950 | 27823050 | 901-Lng-C-T  | 43  | chr18:27822950-27823050 |
| chr18 | 27823250 | 27823350 | 1274-Lng-A-T | 139 | chr18:27823250-27823350 |
| chr18 | 27829550 | 27829650 | 1223-Lng-A-T | 216 | chr18:27829550-27829650 |
| chr18 | 27984550 | 27984650 | 1090-Lng-A-T | 63  | chr18:27984550-27984650 |
| chr18 | 28062250 | 28062350 | 1223-Lng-A-T | 128 | chr18:28062250-28062350 |
| chr18 | 28299850 | 28299950 | 1100-Lng-A-T | 55  | chr18:28299850-28299950 |
| chr18 | 28519950 | 28520050 | 1223-Lng-A-T | 211 | chr18:28519950-28520050 |
| chr18 | 28564650 | 28564750 | 901-Lng-A-T  | 298 | chr18:28564650-28564750 |
| chr18 | 28584350 | 28584450 | 1065-Lng-A-T | 58  | chr18:28584350-28584450 |
| chr18 | 28599950 | 28600050 | 901-Lng-A-T  | 115 | chr18:28599950-28600050 |
| chr18 | 28606450 | 28606550 | 1151-Lng-A-T | 82  | chr18:28606450-28606550 |
| chr18 | 28712250 | 28712350 | 901-Lng-A-T  | 185 | chr18:28712250-28712350 |
| chr18 | 28793150 | 28793250 | 1223-Lng-B-T | 53  | chr18:28793150-28793250 |
| chr18 | 28876350 | 28876450 | 1065-Lng-C-T | 64  | chr18:28876350-28876450 |
| chr18 | 28934550 | 28934650 | 1065-Lng-C-T | 79  | chr18:28934550-28934650 |
| chr18 | 28946350 | 28946450 | 1004-Lng-A-T | 130 | chr18:28946350-28946450 |
| chr18 | 28992550 | 28992650 | 1223-Lng-B-T | 183 | chr18:28992550-28992650 |
| chr18 | 29053950 | 29054050 | 1065-Lng-C-T | 115 | chr18:29053950-29054050 |
| chr18 | 29248450 | 29248550 | 901-Lng-B-T  | 163 | chr18:29248450-29248550 |
| chr18 | 29556450 | 29556550 | 1223-Lng-B-T | 58  | chr18:29556450-29556550 |
| chr18 | 29579650 | 29579750 | 1188-Lng-A-T | 41  | chr18:29579650-29579750 |
| chr18 | 29762750 | 29762850 | 1065-Lng-C-T | 101 | chr18:29762750-29762850 |
| chr18 | 29816250 | 29816350 | 1065-Lng-A-T | 85  | chr18:29816250-29816350 |
| chr18 | 30163450 | 30163550 | 1223-Lng-B-T | 101 | chr18:30163450-30163550 |
| chr18 | 30188250 | 30188350 | 901-Lng-C-T  | 38  | chr18:30188250-30188350 |
| chr18 | 30363950 | 30364050 | 901-Lng-A-T  | 104 | chr18:30363950-30364050 |
| chr18 | 30445650 | 30445750 | 1152-Lng-A-T | 243 | chr18:30445650-30445750 |
| chr18 | 30563250 | 30563350 | 1004-Lng-A-T | 52  | chr18:30563250-30563350 |
| chr18 | 30725350 | 30725450 | 901-Lng-C-T  | 31  | chr18:30725350-30725450 |
| chr18 | 30887950 | 30888050 | 1188-Lng-A-T | 37  | chr18:30887950-30888050 |

**Table S2: SB Insertion regions**

|       |          |          |              |      |                         |
|-------|----------|----------|--------------|------|-------------------------|
| chr18 | 31034850 | 31034950 | 1223-Lng-A-T | 82   | chr18:31034850-31034950 |
| chr18 | 31044650 | 31044750 | 1188-Lng-A-T | 330  | chr18:31044650-31044750 |
| chr18 | 31136050 | 31136150 | 1065-Lng-C-T | 73   | chr18:31136050-31136150 |
| chr18 | 31210450 | 31210550 | 901-Lng-B-T  | 43   | chr18:31210450-31210550 |
| chr18 | 31384950 | 31385050 | 1090-Lng-B-T | 379  | chr18:31384950-31385050 |
| chr18 | 31480950 | 31481050 | 1065-Lng-B-T | 41   | chr18:31480950-31481050 |
| chr18 | 31686850 | 31686950 | 1223-Lng-D-T | 41   | chr18:31686850-31686950 |
| chr18 | 31765450 | 31765550 | 1274-Lng-A-T | 55   | chr18:31765450-31765550 |
| chr18 | 31818250 | 31818350 | 1004-Lng-A-T | 52   | chr18:31818250-31818350 |
| chr18 | 32008650 | 32008750 | 1223-Lng-D-T | 46   | chr18:32008650-32008750 |
| chr18 | 32025750 | 32025850 | 1004-Lng-A-T | 66   | chr18:32025750-32025850 |
| chr18 | 32061650 | 32061750 | 1090-Lng-A-T | 1337 | chr18:32061650-32061750 |
| chr18 | 32225950 | 32226050 | 1223-Lng-B-T | 240  | chr18:32225950-32226050 |
| chr18 | 32334350 | 32334450 | 1090-Lng-B-T | 807  | chr18:32334350-32334450 |
| chr18 | 32341550 | 32341650 | 1152-Lng-A-T | 114  | chr18:32341550-32341650 |
| chr18 | 32351850 | 32351950 | 901-Lng-A-T  | 362  | chr18:32351850-32351950 |
| chr18 | 32358550 | 32358650 | 1065-Lng-A-T | 58   | chr18:32358550-32358650 |
| chr18 | 32428850 | 32428950 | 1188-Lng-A-T | 79   | chr18:32428850-32428950 |
| chr18 | 32511650 | 32511750 | 1223-Lng-C-T | 172  | chr18:32511650-32511750 |
| chr18 | 32511750 | 32511850 | 1223-Lng-C-T | 470  | chr18:32511750-32511850 |
| chr18 | 32746250 | 32746350 | 901-Lng-A-T  | 300  | chr18:32746250-32746350 |
| chr18 | 32822750 | 32822850 | 1065-Lng-A-T | 68   | chr18:32822750-32822850 |
| chr18 | 33386750 | 33386850 | 1065-Lng-B-T | 57   | chr18:33386750-33386850 |
| chr18 | 33511850 | 33511950 | 1223-Lng-D-T | 43   | chr18:33511850-33511950 |
| chr18 | 33761950 | 33762050 | 1072-Lng-A-T | 84   | chr18:33761950-33762050 |
| chr18 | 33923350 | 33923450 | 1065-Lng-B-T | 45   | chr18:33923350-33923450 |
| chr18 | 33998150 | 33998250 | 1090-Lng-A-T | 73   | chr18:33998150-33998250 |
| chr18 | 34046850 | 34046950 | 1090-Lng-B-T | 1463 | chr18:34046850-34046950 |
| chr18 | 34164350 | 34164450 | 1223-Lng-B-T | 38   | chr18:34164350-34164450 |
| chr18 | 34464350 | 34464450 | 1152-Lng-A-T | 51   | chr18:34464350-34464450 |
| chr18 | 34465250 | 34465350 | 1167-Lng-A-T | 95   | chr18:34465250-34465350 |
| chr18 | 34470050 | 34470150 | 1004-Lng-A-T | 74   | chr18:34470050-34470150 |
| chr18 | 34621750 | 34621850 | 1004-Lng-A-T | 49   | chr18:34621750-34621850 |
| chr18 | 34656850 | 34656950 | 1065-Lng-B-T | 103  | chr18:34656850-34656950 |
| chr18 | 34957850 | 34957950 | 1090-Lng-A-T | 54   | chr18:34957850-34957950 |
| chr18 | 34993150 | 34993250 | 1065-Lng-A-T | 68   | chr18:34993150-34993250 |
| chr18 | 35047550 | 35047650 | 1151-Lng-A-T | 272  | chr18:35047550-35047650 |
| chr18 | 35060350 | 35060450 | 1100-Lng-A-T | 61   | chr18:35060350-35060450 |
| chr18 | 35075350 | 35075450 | 901-Lng-B-T  | 156  | chr18:35075350-35075450 |
| chr18 | 35079350 | 35079450 | 1223-Lng-C-T | 101  | chr18:35079350-35079450 |
| chr18 | 35254750 | 35254850 | 1188-Lng-A-T | 34   | chr18:35254750-35254850 |
| chr18 | 35317950 | 35318050 | 1274-Lng-A-T | 69   | chr18:35317950-35318050 |
| chr18 | 35336250 | 35336350 | 1223-Lng-D-T | 46   | chr18:35336250-35336350 |
| chr18 | 35347650 | 35347750 | 1100-Lng-A-T | 97   | chr18:35347650-35347750 |
| chr18 | 35357650 | 35357750 | 1004-Lng-A-T | 92   | chr18:35357650-35357750 |
| chr18 | 35361750 | 35361850 | 1065-Lng-C-T | 120  | chr18:35361750-35361850 |

**Table S2: SB Insertion regions**

|       |          |          |              |     |                         |
|-------|----------|----------|--------------|-----|-------------------------|
| chr18 | 35362350 | 35362450 | 1188-Lng-A-T | 76  | chr18:35362350-35362450 |
| chr18 | 35363850 | 35363950 | 1274-Lng-A-T | 159 | chr18:35363850-35363950 |
| chr18 | 35734850 | 35734950 | 1100-Lng-A-T | 62  | chr18:35734850-35734950 |
| chr18 | 35740150 | 35740250 | 1065-Lng-C-T | 73  | chr18:35740150-35740250 |
| chr18 | 35744650 | 35744750 | 1100-Lng-A-T | 113 | chr18:35744650-35744750 |
| chr18 | 35963650 | 35963750 | 901-Lng-A-T  | 64  | chr18:35963650-35963750 |
| chr18 | 35972950 | 35973050 | 1004-Lng-A-T | 903 | chr18:35972950-35973050 |
| chr18 | 35974150 | 35974250 | 1072-Lng-A-T | 107 | chr18:35974150-35974250 |
| chr18 | 36059850 | 36059950 | 901-Lng-A-T  | 125 | chr18:36059850-36059950 |
| chr18 | 36388950 | 36389050 | 1223-Lng-D-T | 46  | chr18:36388950-36389050 |
| chr18 | 36449550 | 36449650 | 1152-Lng-A-T | 114 | chr18:36449550-36449650 |
| chr18 | 36454650 | 36454750 | 1065-Lng-C-T | 66  | chr18:36454650-36454750 |
| chr18 | 36458650 | 36458750 | 1152-Lng-A-T | 47  | chr18:36458650-36458750 |
| chr18 | 36460050 | 36460150 | 1090-Lng-A-T | 99  | chr18:36460050-36460150 |
| chr18 | 36483350 | 36483450 | 901-Lng-A-T  | 78  | chr18:36483350-36483450 |
| chr18 | 36513250 | 36513350 | 1223-Lng-C-T | 56  | chr18:36513250-36513350 |
| chr18 | 36515950 | 36516050 | 1065-Lng-A-T | 40  | chr18:36515950-36516050 |
| chr18 | 36517550 | 36517650 | 1223-Lng-C-T | 59  | chr18:36517550-36517650 |
| chr18 | 36524950 | 36525050 | 1274-Lng-A-T | 146 | chr18:36524950-36525050 |
| chr18 | 36531850 | 36531950 | 1223-Lng-C-T | 246 | chr18:36531850-36531950 |
| chr18 | 36532250 | 36532350 | 1152-Lng-A-T | 78  | chr18:36532250-36532350 |
| chr18 | 36753650 | 36753750 | 1167-Lng-A-T | 68  | chr18:36753650-36753750 |
| chr18 | 36765450 | 36765550 | 1223-Lng-C-T | 44  | chr18:36765450-36765550 |
| chr18 | 36904750 | 36904850 | 1090-Lng-A-T | 86  | chr18:36904750-36904850 |
| chr18 | 36960750 | 36960850 | 1223-Lng-C-T | 47  | chr18:36960750-36960850 |
| chr18 | 37086850 | 37086950 | 1065-Lng-A-T | 50  | chr18:37086850-37086950 |
| chr18 | 37102250 | 37102350 | 1065-Lng-A-T | 50  | chr18:37102250-37102350 |
| chr18 | 37254550 | 37254650 | 846-Lng-A-T  | 69  | chr18:37254550-37254650 |
| chr18 | 37354550 | 37354650 | 901-Lng-A-T  | 649 | chr18:37354550-37354650 |
| chr18 | 37620650 | 37620750 | 901-Lng-D-T  | 96  | chr18:37620650-37620750 |
| chr18 | 37686350 | 37686450 | 1072-Lng-A-T | 58  | chr18:37686350-37686450 |
| chr18 | 37994250 | 37994350 | 846-Lng-A-T  | 113 | chr18:37994250-37994350 |
| chr18 | 38017850 | 38017950 | 846-Lng-A-T  | 102 | chr18:38017850-38017950 |
| chr18 | 38059950 | 38060050 | 1100-Lng-A-T | 137 | chr18:38059950-38060050 |
| chr18 | 38109350 | 38109450 | 1004-Lng-A-T | 265 | chr18:38109350-38109450 |
| chr18 | 38116450 | 38116550 | 1100-Lng-A-T | 67  | chr18:38116450-38116550 |
| chr18 | 38217250 | 38217350 | 1065-Lng-C-T | 77  | chr18:38217250-38217350 |
| chr18 | 38319150 | 38319250 | 1188-Lng-A-T | 257 | chr18:38319150-38319250 |
| chr18 | 38392250 | 38392350 | 901-Lng-C-T  | 116 | chr18:38392250-38392350 |
| chr18 | 38462250 | 38462350 | 1223-Lng-C-T | 473 | chr18:38462250-38462350 |
| chr18 | 38544750 | 38544850 | 901-Lng-A-T  | 71  | chr18:38544750-38544850 |
| chr18 | 38598850 | 38598950 | 1274-Lng-A-T | 124 | chr18:38598850-38598950 |
| chr18 | 38600550 | 38600650 | 1223-Lng-B-T | 171 | chr18:38600550-38600650 |
| chr18 | 38606850 | 38606950 | 1065-Lng-A-T | 49  | chr18:38606850-38606950 |
| chr18 | 38608350 | 38608450 | 1072-Lng-A-T | 49  | chr18:38608350-38608450 |
| chr18 | 38610050 | 38610150 | 1100-Lng-A-T | 128 | chr18:38610050-38610150 |

**Table S2: SB Insertion regions**

|       |          |          |              |      |                         |
|-------|----------|----------|--------------|------|-------------------------|
| chr18 | 38623650 | 38623750 | 1100-Lng-A-T | 116  | chr18:38623650-38623750 |
| chr18 | 38625850 | 38625950 | 1152-Lng-A-T | 67   | chr18:38625850-38625950 |
| chr18 | 39008050 | 39008150 | 1152-Lng-A-T | 170  | chr18:39008050-39008150 |
| chr18 | 39035350 | 39035450 | 1100-Lng-A-T | 55   | chr18:39035350-39035450 |
| chr18 | 39088050 | 39088150 | 1065-Lng-C-T | 69   | chr18:39088050-39088150 |
| chr18 | 39107650 | 39107750 | 901-Lng-D-T  | 278  | chr18:39107650-39107750 |
| chr18 | 39167550 | 39167650 | 1188-Lng-A-T | 102  | chr18:39167550-39167650 |
| chr18 | 39525850 | 39525950 | 1004-Lng-A-T | 107  | chr18:39525850-39525950 |
| chr18 | 39556550 | 39556650 | 1100-Lng-A-T | 87   | chr18:39556550-39556650 |
| chr18 | 39571250 | 39571350 | 1090-Lng-A-T | 73   | chr18:39571250-39571350 |
| chr18 | 39623450 | 39623550 | 901-Lng-B-T  | 100  | chr18:39623450-39623550 |
| chr18 | 39626550 | 39626650 | 1223-Lng-B-T | 268  | chr18:39626550-39626650 |
| chr18 | 39631750 | 39631850 | 1223-Lng-C-T | 46   | chr18:39631750-39631850 |
| chr18 | 39642950 | 39643050 | 1188-Lng-A-T | 43   | chr18:39642950-39643050 |
| chr18 | 39859250 | 39859350 | 1223-Lng-C-T | 70   | chr18:39859250-39859350 |
| chr18 | 40054050 | 40054150 | 901-Lng-D-T  | 59   | chr18:40054050-40054150 |
| chr18 | 40240250 | 40240350 | 1223-Lng-D-T | 48   | chr18:40240250-40240350 |
| chr18 | 40247050 | 40247150 | 1274-Lng-A-T | 70   | chr18:40247050-40247150 |
| chr18 | 40590350 | 40590450 | 1223-Lng-A-T | 308  | chr18:40590350-40590450 |
| chr18 | 40666950 | 40667050 | 901-Lng-C-T  | 114  | chr18:40666950-40667050 |
| chr18 | 40792950 | 40793050 | 901-Lng-B-T  | 264  | chr18:40792950-40793050 |
| chr18 | 40882750 | 40882850 | 1188-Lng-A-T | 162  | chr18:40882750-40882850 |
| chr18 | 41178550 | 41178650 | 1151-Lng-A-T | 481  | chr18:41178550-41178650 |
| chr18 | 41213850 | 41213950 | 1065-Lng-B-T | 60   | chr18:41213850-41213950 |
| chr18 | 41304350 | 41304450 | 1274-Lng-A-T | 98   | chr18:41304350-41304450 |
| chr18 | 41516650 | 41516750 | 1090-Lng-A-T | 68   | chr18:41516650-41516750 |
| chr18 | 41591450 | 41591550 | 901-Lng-C-T  | 62   | chr18:41591450-41591550 |
| chr18 | 41810450 | 41810550 | 1004-Lng-A-T | 70   | chr18:41810450-41810550 |
| chr18 | 41977250 | 41977350 | 901-Lng-C-T  | 65   | chr18:41977250-41977350 |
| chr18 | 41987350 | 41987450 | 901-Lng-B-T  | 183  | chr18:41987350-41987450 |
| chr18 | 42092450 | 42092550 | 1065-Lng-B-T | 133  | chr18:42092450-42092550 |
| chr18 | 42097250 | 42097350 | 1004-Lng-A-T | 60   | chr18:42097250-42097350 |
| chr18 | 42098750 | 42098850 | 1072-Lng-A-T | 54   | chr18:42098750-42098850 |
| chr18 | 42102550 | 42102650 | 901-Lng-A-T  | 198  | chr18:42102550-42102650 |
| chr18 | 42129650 | 42129750 | 901-Lng-A-T  | 103  | chr18:42129650-42129750 |
| chr18 | 42171150 | 42171250 | 901-Lng-C-T  | 3365 | chr18:42171150-42171250 |
| chr18 | 42325950 | 42326050 | 1100-Lng-A-T | 64   | chr18:42325950-42326050 |
| chr18 | 42394750 | 42394850 | 1274-Lng-A-T | 138  | chr18:42394750-42394850 |
| chr18 | 42484750 | 42484850 | 1090-Lng-A-T | 60   | chr18:42484750-42484850 |
| chr18 | 42496650 | 42496750 | 1090-Lng-A-T | 58   | chr18:42496650-42496750 |
| chr18 | 42541950 | 42542050 | 901-Lng-C-T  | 299  | chr18:42541950-42542050 |
| chr18 | 42581350 | 42581450 | 1065-Lng-A-T | 47   | chr18:42581350-42581450 |
| chr18 | 42706750 | 42706850 | 901-Lng-B-T  | 969  | chr18:42706750-42706850 |
| chr18 | 42715450 | 42715550 | 901-Lng-C-T  | 294  | chr18:42715450-42715550 |
| chr18 | 42717350 | 42717450 | 1065-Lng-B-T | 66   | chr18:42717350-42717450 |
| chr18 | 42889250 | 42889350 | 1223-Lng-A-T | 76   | chr18:42889250-42889350 |

**Table S2: SB Insertion regions**

|       |          |          |              |      |                         |
|-------|----------|----------|--------------|------|-------------------------|
| chr18 | 42911850 | 42911950 | 1100-Lng-A-T | 56   | chr18:42911850-42911950 |
| chr18 | 42934350 | 42934450 | 846-Lng-A-T  | 52   | chr18:42934350-42934450 |
| chr18 | 43026850 | 43026950 | 1090-Lng-B-T | 140  | chr18:43026850-43026950 |
| chr18 | 43193550 | 43193650 | 1152-Lng-A-T | 46   | chr18:43193550-43193650 |
| chr18 | 43302350 | 43302450 | 1152-Lng-A-T | 98   | chr18:43302350-43302450 |
| chr18 | 43344550 | 43344650 | 1065-Lng-B-T | 46   | chr18:43344550-43344650 |
| chr18 | 43671150 | 43671250 | 1065-Lng-A-T | 244  | chr18:43671150-43671250 |
| chr18 | 43821850 | 43821950 | 1090-Lng-B-T | 254  | chr18:43821850-43821950 |
| chr18 | 43824850 | 43824950 | 901-Lng-A-T  | 75   | chr18:43824850-43824950 |
| chr18 | 44023350 | 44023450 | 1065-Lng-A-T | 70   | chr18:44023350-44023450 |
| chr18 | 44144850 | 44144950 | 1100-Lng-A-T | 101  | chr18:44144850-44144950 |
| chr18 | 44164650 | 44164750 | 901-Lng-A-T  | 100  | chr18:44164650-44164750 |
| chr18 | 44170450 | 44170550 | 1223-Lng-B-T | 210  | chr18:44170450-44170550 |
| chr18 | 44262950 | 44263050 | 1065-Lng-A-T | 58   | chr18:44262950-44263050 |
| chr18 | 44275550 | 44275650 | 1065-Lng-C-T | 68   | chr18:44275550-44275650 |
| chr18 | 44445050 | 44445150 | 1065-Lng-A-T | 44   | chr18:44445050-44445150 |
| chr18 | 44540950 | 44541050 | 901-Lng-C-T  | 60   | chr18:44540950-44541050 |
| chr18 | 44542150 | 44542250 | 1090-Lng-A-T | 50   | chr18:44542150-44542250 |
| chr18 | 44588350 | 44588450 | 1072-Lng-A-T | 55   | chr18:44588350-44588450 |
| chr18 | 44634150 | 44634250 | 1152-Lng-A-T | 134  | chr18:44634150-44634250 |
| chr18 | 44718650 | 44718750 | 901-Lng-C-T  | 28   | chr18:44718650-44718750 |
| chr18 | 44732250 | 44732350 | 1152-Lng-A-T | 61   | chr18:44732250-44732350 |
| chr18 | 45043250 | 45043350 | 901-Lng-B-T  | 79   | chr18:45043250-45043350 |
| chr18 | 45272350 | 45272450 | 901-Lng-C-T  | 188  | chr18:45272350-45272450 |
| chr18 | 45374550 | 45374650 | 1100-Lng-A-T | 53   | chr18:45374550-45374650 |
| chr18 | 45411850 | 45411950 | 1274-Lng-A-T | 75   | chr18:45411850-45411950 |
| chr18 | 45477950 | 45478050 | 1072-Lng-A-T | 210  | chr18:45477950-45478050 |
| chr18 | 45480950 | 45481050 | 1090-Lng-A-T | 67   | chr18:45480950-45481050 |
| chr18 | 45628750 | 45628850 | 1167-Lng-A-T | 75   | chr18:45628750-45628850 |
| chr18 | 45711250 | 45711350 | 901-Lng-A-T  | 123  | chr18:45711250-45711350 |
| chr18 | 45761950 | 45762050 | 1151-Lng-A-T | 59   | chr18:45761950-45762050 |
| chr18 | 45796150 | 45796250 | 901-Lng-C-T  | 125  | chr18:45796150-45796250 |
| chr18 | 45836150 | 45836250 | 1065-Lng-B-T | 54   | chr18:45836150-45836250 |
| chr18 | 46076150 | 46076250 | 1274-Lng-A-T | 53   | chr18:46076150-46076250 |
| chr18 | 46274950 | 46275050 | 846-Lng-A-T  | 150  | chr18:46274950-46275050 |
| chr18 | 46327950 | 46328050 | 1188-Lng-A-T | 48   | chr18:46327950-46328050 |
| chr18 | 46367750 | 46367850 | 901-Lng-D-T  | 242  | chr18:46367750-46367850 |
| chr18 | 46404750 | 46404850 | 901-Lng-C-T  | 1913 | chr18:46404750-46404850 |
| chr18 | 46412550 | 46412650 | 1152-Lng-A-T | 107  | chr18:46412550-46412650 |
| chr18 | 46452550 | 46452650 | 901-Lng-A-T  | 191  | chr18:46452550-46452650 |
| chr18 | 46471750 | 46471850 | 1065-Lng-A-T | 40   | chr18:46471750-46471850 |
| chr18 | 46491050 | 46491150 | 901-Lng-B-T  | 75   | chr18:46491050-46491150 |
| chr18 | 46607850 | 46607950 | 1223-Lng-D-T | 40   | chr18:46607850-46607950 |
| chr18 | 46633650 | 46633750 | 1188-Lng-A-T | 196  | chr18:46633650-46633750 |
| chr18 | 46643850 | 46643950 | 1100-Lng-A-T | 117  | chr18:46643850-46643950 |
| chr18 | 46663550 | 46663650 | 1223-Lng-B-T | 89   | chr18:46663550-46663650 |



**Table S2: SB Insertion regions**

|       |          |          |              |     |                         |
|-------|----------|----------|--------------|-----|-------------------------|
| chr18 | 46671850 | 46671950 | 1004-Lng-A-T | 60  | chr18:46671850-46671950 |
| chr18 | 46673750 | 46673850 | 1274-Lng-A-T | 90  | chr18:46673750-46673850 |
| chr18 | 46677550 | 46677650 | 901-Lng-A-T  | 116 | chr18:46677550-46677650 |
| chr18 | 46759350 | 46759450 | 1100-Lng-B-T | 54  | chr18:46759350-46759450 |
| chr18 | 46762450 | 46762550 | 1151-Lng-A-T | 287 | chr18:46762450-46762550 |
| chr18 | 46911350 | 46911450 | 1188-Lng-A-T | 63  | chr18:46911350-46911450 |
| chr18 | 46911350 | 46911450 | 1004-Lng-A-T | 53  | chr18:46911350-46911450 |
| chr18 | 46930750 | 46930850 | 1223-Lng-B-T | 107 | chr18:46930750-46930850 |
| chr18 | 47186350 | 47186450 | 1167-Lng-A-T | 118 | chr18:47186350-47186450 |
| chr18 | 47220750 | 47220850 | 1100-Lng-A-T | 110 | chr18:47220750-47220850 |
| chr18 | 47281250 | 47281350 | 901-Lng-C-T  | 70  | chr18:47281250-47281350 |
| chr18 | 47449350 | 47449450 | 901-Lng-C-T  | 44  | chr18:47449350-47449450 |
| chr18 | 47477450 | 47477550 | 1223-Lng-A-T | 113 | chr18:47477450-47477550 |
| chr18 | 47872850 | 47872950 | 1223-Lng-B-T | 210 | chr18:47872850-47872950 |
| chr18 | 47972750 | 47972850 | 1065-Lng-B-T | 39  | chr18:47972750-47972850 |
| chr18 | 48045350 | 48045450 | 901-Lng-C-T  | 69  | chr18:48045350-48045450 |
| chr18 | 48060750 | 48060850 | 1065-Lng-B-T | 103 | chr18:48060750-48060850 |
| chr18 | 48142150 | 48142250 | 1065-Lng-A-T | 61  | chr18:48142150-48142250 |
| chr18 | 48280250 | 48280350 | 1188-Lng-A-T | 122 | chr18:48280250-48280350 |
| chr18 | 48414250 | 48414350 | 901-Lng-A-T  | 74  | chr18:48414250-48414350 |
| chr18 | 48431150 | 48431250 | 1072-Lng-A-T | 53  | chr18:48431150-48431250 |
| chr18 | 48498050 | 48498150 | 1004-Lng-A-T | 130 | chr18:48498050-48498150 |
| chr18 | 48514450 | 48514550 | 1090-Lng-A-T | 44  | chr18:48514450-48514550 |
| chr18 | 49076950 | 49077050 | 846-Lng-A-T  | 193 | chr18:49076950-49077050 |
| chr18 | 49080450 | 49080550 | 901-Lng-C-T  | 165 | chr18:49080450-49080550 |
| chr18 | 49195650 | 49195750 | 1065-Lng-C-T | 82  | chr18:49195650-49195750 |
| chr18 | 49239350 | 49239450 | 1065-Lng-C-T | 72  | chr18:49239350-49239450 |
| chr18 | 49260550 | 49260650 | 901-Lng-D-T  | 166 | chr18:49260550-49260650 |
| chr18 | 49268550 | 49268650 | 1004-Lng-A-T | 58  | chr18:49268550-49268650 |
| chr18 | 49291150 | 49291250 | 1223-Lng-B-T | 61  | chr18:49291150-49291250 |
| chr18 | 49368750 | 49368850 | 846-Lng-A-T  | 99  | chr18:49368750-49368850 |
| chr18 | 49438550 | 49438650 | 901-Lng-D-T  | 202 | chr18:49438550-49438650 |
| chr18 | 49566950 | 49567050 | 1152-Lng-A-T | 40  | chr18:49566950-49567050 |
| chr18 | 49660950 | 49661050 | 901-Lng-C-T  | 69  | chr18:49660950-49661050 |
| chr18 | 49715550 | 49715650 | 1065-Lng-B-T | 71  | chr18:49715550-49715650 |
| chr18 | 49889550 | 49889650 | 1065-Lng-A-T | 38  | chr18:49889550-49889650 |
| chr18 | 49894750 | 49894850 | 1072-Lng-A-T | 182 | chr18:49894750-49894850 |
| chr18 | 49993250 | 49993350 | 1065-Lng-B-T | 401 | chr18:49993250-49993350 |
| chr18 | 49994550 | 49994650 | 1065-Lng-C-T | 67  | chr18:49994550-49994650 |
| chr18 | 49999450 | 49999550 | 901-Lng-A-T  | 109 | chr18:49999450-49999550 |
| chr18 | 50009950 | 50010050 | 1223-Lng-B-T | 121 | chr18:50009950-50010050 |
| chr18 | 50030650 | 50030750 | 1152-Lng-A-T | 111 | chr18:50030650-50030750 |
| chr18 | 50051950 | 50052050 | 1223-Lng-A-T | 101 | chr18:50051950-50052050 |
| chr18 | 50067850 | 50067950 | 1151-Lng-A-T | 81  | chr18:50067850-50067950 |
| chr18 | 50069450 | 50069550 | 1065-Lng-B-T | 427 | chr18:50069450-50069550 |
| chr18 | 50083450 | 50083550 | 1152-Lng-A-T | 68  | chr18:50083450-50083550 |

**Table S2: SB Insertion regions**

|       |          |          |              |     |                         |
|-------|----------|----------|--------------|-----|-------------------------|
| chr18 | 50122650 | 50122750 | 1152-Lng-A-T | 127 | chr18:50122650-50122750 |
| chr18 | 50138150 | 50138250 | 1152-Lng-A-T | 66  | chr18:50138150-50138250 |
| chr18 | 50237850 | 50237950 | 1223-Lng-A-T | 55  | chr18:50237850-50237950 |
| chr18 | 50284150 | 50284250 | 1090-Lng-A-T | 82  | chr18:50284150-50284250 |
| chr18 | 50316850 | 50316950 | 1274-Lng-A-T | 54  | chr18:50316850-50316950 |
| chr18 | 50339150 | 50339250 | 1065-Lng-A-T | 100 | chr18:50339150-50339250 |
| chr18 | 50735750 | 50735850 | 1100-Lng-A-T | 74  | chr18:50735750-50735850 |
| chr18 | 51085050 | 51085150 | 901-Lng-B-T  | 37  | chr18:51085050-51085150 |
| chr18 | 51209950 | 51210050 | 901-Lng-C-T  | 29  | chr18:51209950-51210050 |
| chr18 | 51487850 | 51487950 | 1065-Lng-B-T | 67  | chr18:51487850-51487950 |
| chr18 | 51496850 | 51496950 | 1072-Lng-A-T | 156 | chr18:51496850-51496950 |
| chr18 | 51869950 | 51870050 | 1065-Lng-B-T | 107 | chr18:51869950-51870050 |
| chr18 | 51935550 | 51935650 | 1152-Lng-A-T | 155 | chr18:51935550-51935650 |
| chr18 | 51943550 | 51943650 | 901-Lng-C-T  | 115 | chr18:51943550-51943650 |
| chr18 | 51963750 | 51963850 | 901-Lng-C-T  | 77  | chr18:51963750-51963850 |
| chr18 | 52036350 | 52036450 | 1072-Lng-A-T | 121 | chr18:52036350-52036450 |
| chr18 | 52111550 | 52111650 | 1223-Lng-B-T | 175 | chr18:52111550-52111650 |
| chr18 | 52276450 | 52276550 | 1152-Lng-A-T | 54  | chr18:52276450-52276550 |
| chr18 | 52447250 | 52447350 | 1072-Lng-A-T | 67  | chr18:52447250-52447350 |
| chr18 | 52518950 | 52519050 | 1152-Lng-A-T | 58  | chr18:52518950-52519050 |
| chr18 | 52589750 | 52589850 | 1065-Lng-B-T | 238 | chr18:52589750-52589850 |
| chr18 | 52628650 | 52628750 | 1004-Lng-A-T | 93  | chr18:52628650-52628750 |
| chr18 | 52640750 | 52640850 | 1223-Lng-C-T | 50  | chr18:52640750-52640850 |
| chr18 | 52725450 | 52725550 | 1223-Lng-D-T | 154 | chr18:52725450-52725550 |
| chr18 | 52887450 | 52887550 | 1065-Lng-A-T | 55  | chr18:52887450-52887550 |
| chr18 | 52906950 | 52907050 | 1223-Lng-C-T | 47  | chr18:52906950-52907050 |
| chr18 | 53329750 | 53329850 | 1072-Lng-A-T | 72  | chr18:53329750-53329850 |
| chr18 | 53349950 | 53350050 | 1152-Lng-A-T | 306 | chr18:53349950-53350050 |
| chr18 | 53357750 | 53357850 | 901-Lng-D-T  | 108 | chr18:53357750-53357850 |
| chr18 | 53380350 | 53380450 | 901-Lng-A-T  | 53  | chr18:53380350-53380450 |
| chr18 | 53399550 | 53399650 | 1223-Lng-C-T | 587 | chr18:53399550-53399650 |
| chr18 | 53434650 | 53434750 | 1090-Lng-A-T | 65  | chr18:53434650-53434750 |
| chr18 | 53439650 | 53439750 | 901-Lng-D-T  | 85  | chr18:53439650-53439750 |
| chr18 | 53449250 | 53449350 | 1004-Lng-A-T | 54  | chr18:53449250-53449350 |
| chr18 | 53456050 | 53456150 | 1090-Lng-B-T | 86  | chr18:53456050-53456150 |
| chr18 | 53498950 | 53499050 | 1152-Lng-A-T | 178 | chr18:53498950-53499050 |
| chr18 | 53754950 | 53755050 | 1065-Lng-B-T | 279 | chr18:53754950-53755050 |
| chr18 | 53775750 | 53775850 | 1004-Lng-A-T | 74  | chr18:53775750-53775850 |
| chr18 | 53856650 | 53856750 | 1223-Lng-B-T | 62  | chr18:53856650-53856750 |
| chr18 | 53886450 | 53886550 | 1223-Lng-D-T | 47  | chr18:53886450-53886550 |
| chr18 | 54024250 | 54024350 | 1223-Lng-B-T | 38  | chr18:54024250-54024350 |
| chr18 | 54038050 | 54038150 | 1065-Lng-C-T | 70  | chr18:54038050-54038150 |
| chr18 | 54052150 | 54052250 | 1223-Lng-A-T | 63  | chr18:54052150-54052250 |
| chr18 | 54053750 | 54053850 | 1223-Lng-A-T | 222 | chr18:54053750-54053850 |
| chr18 | 54426850 | 54426950 | 901-Lng-A-T  | 170 | chr18:54426850-54426950 |
| chr18 | 54458050 | 54458150 | 1223-Lng-A-T | 281 | chr18:54458050-54458150 |

**Table S2: SB Insertion regions**

|       |          |          |              |      |                         |
|-------|----------|----------|--------------|------|-------------------------|
| chr18 | 54588550 | 54588650 | 1151-Lng-A-T | 68   | chr18:54588550-54588650 |
| chr18 | 54651750 | 54651850 | 1004-Lng-A-T | 90   | chr18:54651750-54651850 |
| chr18 | 54701350 | 54701450 | 1167-Lng-A-T | 1900 | chr18:54701350-54701450 |
| chr18 | 54732350 | 54732450 | 846-Lng-A-T  | 1253 | chr18:54732350-54732450 |
| chr18 | 54805950 | 54806050 | 901-Lng-B-T  | 215  | chr18:54805950-54806050 |
| chr18 | 54886350 | 54886450 | 901-Lng-C-T  | 34   | chr18:54886350-54886450 |
| chr18 | 55044050 | 55044150 | 1223-Lng-B-T | 34   | chr18:55044050-55044150 |
| chr18 | 55049250 | 55049350 | 1090-Lng-A-T | 59   | chr18:55049250-55049350 |
| chr18 | 55053350 | 55053450 | 1274-Lng-A-T | 162  | chr18:55053350-55053450 |
| chr18 | 55054450 | 55054550 | 1274-Lng-A-T | 51   | chr18:55054450-55054550 |
| chr18 | 55063950 | 55064050 | 1065-Lng-B-T | 67   | chr18:55063950-55064050 |
| chr18 | 55088650 | 55088750 | 1274-Lng-A-T | 68   | chr18:55088650-55088750 |
| chr18 | 55102050 | 55102150 | 1223-Lng-D-T | 40   | chr18:55102050-55102150 |
| chr18 | 55128150 | 55128250 | 901-Lng-B-T  | 63   | chr18:55128150-55128250 |
| chr18 | 55507050 | 55507150 | 1004-Lng-A-T | 107  | chr18:55507050-55507150 |
| chr18 | 55657750 | 55657850 | 846-Lng-A-T  | 91   | chr18:55657750-55657850 |
| chr18 | 55889350 | 55889450 | 1152-Lng-A-T | 85   | chr18:55889350-55889450 |
| chr18 | 55968250 | 55968350 | 1065-Lng-C-T | 90   | chr18:55968250-55968350 |
| chr18 | 56074750 | 56074850 | 1274-Lng-A-T | 64   | chr18:56074750-56074850 |
| chr18 | 56229550 | 56229650 | 1065-Lng-B-T | 51   | chr18:56229550-56229650 |
| chr18 | 56631150 | 56631250 | 901-Lng-C-T  | 49   | chr18:56631150-56631250 |
| chr18 | 56656650 | 56656750 | 1274-Lng-A-T | 121  | chr18:56656650-56656750 |
| chr18 | 56845850 | 56845950 | 1065-Lng-A-T | 40   | chr18:56845850-56845950 |
| chr18 | 56902850 | 56902950 | 1223-Lng-B-T | 36   | chr18:56902850-56902950 |
| chr18 | 57022550 | 57022650 | 1274-Lng-A-T | 74   | chr18:57022550-57022650 |
| chr18 | 57043250 | 57043350 | 1223-Lng-C-T | 55   | chr18:57043250-57043350 |
| chr18 | 57066250 | 57066350 | 901-Lng-C-T  | 78   | chr18:57066250-57066350 |
| chr18 | 57498950 | 57499050 | 1065-Lng-B-T | 107  | chr18:57498950-57499050 |
| chr18 | 57549650 | 57549750 | 901-Lng-C-T  | 33   | chr18:57549650-57549750 |
| chr18 | 57618550 | 57618650 | 846-Lng-A-T  | 206  | chr18:57618550-57618650 |
| chr18 | 57686250 | 57686350 | 1223-Lng-B-T | 87   | chr18:57686250-57686350 |
| chr18 | 57709350 | 57709450 | 846-Lng-A-T  | 70   | chr18:57709350-57709450 |
| chr18 | 57766250 | 57766350 | 1065-Lng-C-T | 79   | chr18:57766250-57766350 |
| chr18 | 57784050 | 57784150 | 1090-Lng-A-T | 52   | chr18:57784050-57784150 |
| chr18 | 57793250 | 57793350 | 1188-Lng-A-T | 52   | chr18:57793250-57793350 |
| chr18 | 57832750 | 57832850 | 1167-Lng-A-T | 1155 | chr18:57832750-57832850 |
| chr18 | 57832750 | 57832850 | 1167-Lng-A-T | 66   | chr18:57832750-57832850 |
| chr18 | 57931350 | 57931450 | 1167-Lng-A-T | 59   | chr18:57931350-57931450 |
| chr18 | 58044350 | 58044450 | 846-Lng-A-T  | 99   | chr18:58044350-58044450 |
| chr18 | 58061050 | 58061150 | 1274-Lng-A-T | 116  | chr18:58061050-58061150 |
| chr18 | 58086650 | 58086750 | 901-Lng-A-T  | 77   | chr18:58086650-58086750 |
| chr18 | 58303250 | 58303350 | 1274-Lng-A-T | 57   | chr18:58303250-58303350 |
| chr18 | 58458450 | 58458550 | 1065-Lng-B-T | 45   | chr18:58458450-58458550 |
| chr18 | 58571150 | 58571250 | 1065-Lng-C-T | 1166 | chr18:58571150-58571250 |
| chr18 | 58603050 | 58603150 | 901-Lng-A-T  | 114  | chr18:58603050-58603150 |
| chr18 | 59256350 | 59256450 | 1223-Lng-B-T | 266  | chr18:59256350-59256450 |

**Table S2: SB Insertion regions**

|       |          |          |              |     |                         |
|-------|----------|----------|--------------|-----|-------------------------|
| chr18 | 59367250 | 59367350 | 1223-Lng-C-T | 45  | chr18:59367250-59367350 |
| chr18 | 59407150 | 59407250 | 1223-Lng-B-T | 148 | chr18:59407150-59407250 |
| chr18 | 59490950 | 59491050 | 1065-Lng-A-T | 136 | chr18:59490950-59491050 |
| chr18 | 59568250 | 59568350 | 901-Lng-A-T  | 114 | chr18:59568250-59568350 |
| chr18 | 59578650 | 59578750 | 1065-Lng-A-T | 65  | chr18:59578650-59578750 |
| chr18 | 59677350 | 59677450 | 1152-Lng-A-T | 43  | chr18:59677350-59677450 |
| chr18 | 59706150 | 59706250 | 901-Lng-C-T  | 28  | chr18:59706150-59706250 |
| chr18 | 59925550 | 59925650 | 1274-Lng-A-T | 50  | chr18:59925550-59925650 |
| chr18 | 59964450 | 59964550 | 901-Lng-A-T  | 122 | chr18:59964450-59964550 |
| chr18 | 60256450 | 60256550 | 901-Lng-D-T  | 55  | chr18:60256450-60256550 |
| chr18 | 60638650 | 60638750 | 1152-Lng-A-T | 74  | chr18:60638650-60638750 |
| chr18 | 60687950 | 60688050 | 1223-Lng-C-T | 54  | chr18:60687950-60688050 |
| chr18 | 60694950 | 60695050 | 1223-Lng-C-T | 147 | chr18:60694950-60695050 |
| chr18 | 60709750 | 60709850 | 1274-Lng-A-T | 209 | chr18:60709750-60709850 |
| chr18 | 60743250 | 60743350 | 846-Lng-A-T  | 144 | chr18:60743250-60743350 |
| chr18 | 60785450 | 60785550 | 1152-Lng-A-T | 74  | chr18:60785450-60785550 |
| chr18 | 60785550 | 60785650 | 1274-Lng-A-T | 72  | chr18:60785550-60785650 |
| chr18 | 60856950 | 60857050 | 846-Lng-A-T  | 183 | chr18:60856950-60857050 |
| chr18 | 60896150 | 60896250 | 1065-Lng-B-T | 52  | chr18:60896150-60896250 |
| chr18 | 60900750 | 60900850 | 1274-Lng-A-T | 75  | chr18:60900750-60900850 |
| chr18 | 60902250 | 60902350 | 1065-Lng-B-T | 41  | chr18:60902250-60902350 |
| chr18 | 61122650 | 61122750 | 1090-Lng-A-T | 88  | chr18:61122650-61122750 |
| chr18 | 61122650 | 61122750 | 1167-Lng-A-T | 414 | chr18:61122650-61122750 |
| chr18 | 61127450 | 61127550 | 1100-Lng-A-T | 79  | chr18:61127450-61127550 |
| chr18 | 61315350 | 61315450 | 1065-Lng-B-T | 59  | chr18:61315350-61315450 |
| chr18 | 61357550 | 61357650 | 901-Lng-C-T  | 86  | chr18:61357550-61357650 |
| chr18 | 61738150 | 61738250 | 1223-Lng-B-T | 220 | chr18:61738150-61738250 |
| chr18 | 61889950 | 61890050 | 1223-Lng-B-T | 73  | chr18:61889950-61890050 |
| chr18 | 61909650 | 61909750 | 1090-Lng-B-T | 257 | chr18:61909650-61909750 |
| chr18 | 61913550 | 61913650 | 1274-Lng-A-T | 187 | chr18:61913550-61913650 |
| chr18 | 61916250 | 61916350 | 1223-Lng-C-T | 95  | chr18:61916250-61916350 |
| chr18 | 61919350 | 61919450 | 1100-Lng-A-T | 79  | chr18:61919350-61919450 |
| chr18 | 61919850 | 61919950 | 1223-Lng-C-T | 61  | chr18:61919850-61919950 |
| chr18 | 62124450 | 62124550 | 1152-Lng-A-T | 149 | chr18:62124450-62124550 |
| chr18 | 62344350 | 62344450 | 1223-Lng-B-T | 35  | chr18:62344350-62344450 |
| chr18 | 62607450 | 62607550 | 846-Lng-A-T  | 95  | chr18:62607450-62607550 |
| chr18 | 62696250 | 62696350 | 1090-Lng-B-T | 770 | chr18:62696250-62696350 |
| chr18 | 63329150 | 63329250 | 1065-Lng-A-T | 67  | chr18:63329150-63329250 |
| chr18 | 63350050 | 63350150 | 1004-Lng-A-T | 67  | chr18:63350050-63350150 |
| chr18 | 63404950 | 63405050 | 901-Lng-D-T  | 140 | chr18:63404950-63405050 |
| chr18 | 63824850 | 63824950 | 1100-Lng-A-T | 58  | chr18:63824850-63824950 |
| chr18 | 63834350 | 63834450 | 901-Lng-D-T  | 197 | chr18:63834350-63834450 |
| chr18 | 63842350 | 63842450 | 1223-Lng-A-T | 141 | chr18:63842350-63842450 |
| chr18 | 63843550 | 63843650 | 1065-Lng-A-T | 738 | chr18:63843550-63843650 |
| chr18 | 63946250 | 63946350 | 1274-Lng-A-T | 171 | chr18:63946250-63946350 |
| chr18 | 63974250 | 63974350 | 1151-Lng-A-T | 68  | chr18:63974250-63974350 |

**Table S2: SB Insertion regions**

|       |          |          |              |      |                         |
|-------|----------|----------|--------------|------|-------------------------|
| chr18 | 63986750 | 63986850 | 1072-Lng-A-T | 72   | chr18:63986750-63986850 |
| chr18 | 63990250 | 63990350 | 1167-Lng-A-T | 56   | chr18:63990250-63990350 |
| chr18 | 63993050 | 63993150 | 901-Lng-B-T  | 142  | chr18:63993050-63993150 |
| chr18 | 63994050 | 63994150 | 1090-Lng-A-T | 60   | chr18:63994050-63994150 |
| chr18 | 64090350 | 64090450 | 1065-Lng-B-T | 228  | chr18:64090350-64090450 |
| chr18 | 64176050 | 64176150 | 1152-Lng-A-T | 266  | chr18:64176050-64176150 |
| chr18 | 64356450 | 64356550 | 1151-Lng-A-T | 82   | chr18:64356450-64356550 |
| chr18 | 64718850 | 64718950 | 1065-Lng-A-T | 280  | chr18:64718850-64718950 |
| chr18 | 64788450 | 64788550 | 1167-Lng-A-T | 117  | chr18:64788450-64788550 |
| chr18 | 64788950 | 64789050 | 1274-Lng-A-T | 148  | chr18:64788950-64789050 |
| chr18 | 65072650 | 65072750 | 1151-Lng-A-T | 175  | chr18:65072650-65072750 |
| chr18 | 65077150 | 65077250 | 1223-Lng-C-T | 48   | chr18:65077150-65077250 |
| chr18 | 65144350 | 65144450 | 1223-Lng-D-T | 49   | chr18:65144350-65144450 |
| chr18 | 65149750 | 65149850 | 901-Lng-A-T  | 85   | chr18:65149750-65149850 |
| chr18 | 65182550 | 65182650 | 1072-Lng-A-T | 49   | chr18:65182550-65182650 |
| chr18 | 65204850 | 65204950 | 1188-Lng-A-T | 47   | chr18:65204850-65204950 |
| chr18 | 65238450 | 65238550 | 901-Lng-C-T  | 120  | chr18:65238450-65238550 |
| chr18 | 65245850 | 65245950 | 846-Lng-A-T  | 373  | chr18:65245850-65245950 |
| chr18 | 65275650 | 65275750 | 1274-Lng-A-T | 97   | chr18:65275650-65275750 |
| chr18 | 65295050 | 65295150 | 1223-Lng-C-T | 48   | chr18:65295050-65295150 |
| chr18 | 65312350 | 65312450 | 1065-Lng-B-T | 64   | chr18:65312350-65312450 |
| chr18 | 65366550 | 65366650 | 1065-Lng-C-T | 63   | chr18:65366550-65366650 |
| chr18 | 65376750 | 65376850 | 1100-Lng-A-T | 69   | chr18:65376750-65376850 |
| chr18 | 65399050 | 65399150 | 901-Lng-A-T  | 118  | chr18:65399050-65399150 |
| chr18 | 65594850 | 65594950 | 901-Lng-C-T  | 83   | chr18:65594850-65594950 |
| chr18 | 65605650 | 65605750 | 1065-Lng-B-T | 45   | chr18:65605650-65605750 |
| chr18 | 65628950 | 65629050 | 1004-Lng-A-T | 298  | chr18:65628950-65629050 |
| chr18 | 65684350 | 65684450 | 901-Lng-C-T  | 55   | chr18:65684350-65684450 |
| chr18 | 65795750 | 65795850 | 1100-Lng-A-T | 80   | chr18:65795750-65795850 |
| chr18 | 65968850 | 65968950 | 901-Lng-C-T  | 98   | chr18:65968850-65968950 |
| chr18 | 66327050 | 66327150 | 1072-Lng-A-T | 95   | chr18:66327050-66327150 |
| chr18 | 66496350 | 66496450 | 1151-Lng-A-T | 82   | chr18:66496350-66496450 |
| chr18 | 66692250 | 66692350 | 1152-Lng-A-T | 33   | chr18:66692250-66692350 |
| chr18 | 66993850 | 66993950 | 1151-Lng-A-T | 60   | chr18:66993850-66993950 |
| chr18 | 67080350 | 67080450 | 1004-Lng-A-T | 58   | chr18:67080350-67080450 |
| chr18 | 67250750 | 67250850 | 1188-Lng-A-T | 177  | chr18:67250750-67250850 |
| chr18 | 67367450 | 67367550 | 1223-Lng-C-T | 262  | chr18:67367450-67367550 |
| chr18 | 67401150 | 67401250 | 1072-Lng-A-T | 95   | chr18:67401150-67401250 |
| chr18 | 67595650 | 67595750 | 1223-Lng-A-T | 1495 | chr18:67595650-67595750 |
| chr18 | 67698750 | 67698850 | 1090-Lng-B-T | 422  | chr18:67698750-67698850 |
| chr18 | 67844350 | 67844450 | 1100-Lng-A-T | 80   | chr18:67844350-67844450 |
| chr18 | 67852650 | 67852750 | 1151-Lng-A-T | 80   | chr18:67852650-67852750 |
| chr18 | 67882350 | 67882450 | 901-Lng-A-T  | 198  | chr18:67882350-67882450 |
| chr18 | 68129050 | 68129150 | 901-Lng-B-T  | 47   | chr18:68129050-68129150 |
| chr18 | 68171150 | 68171250 | 1065-Lng-A-T | 88   | chr18:68171150-68171250 |
| chr18 | 68174750 | 68174850 | 1188-Lng-A-T | 157  | chr18:68174750-68174850 |

**Table S2: SB Insertion regions**

|       |          |          |              |      |                         |
|-------|----------|----------|--------------|------|-------------------------|
| chr18 | 68187650 | 68187750 | 1223-Lng-A-T | 1280 | chr18:68187650-68187750 |
| chr18 | 68274650 | 68274750 | 1188-Lng-A-T | 181  | chr18:68274650-68274750 |
| chr18 | 68327450 | 68327550 | 846-Lng-A-T  | 55   | chr18:68327450-68327550 |
| chr18 | 68505550 | 68505650 | 901-Lng-C-T  | 72   | chr18:68505550-68505650 |
| chr18 | 68722950 | 68723050 | 1274-Lng-A-T | 71   | chr18:68722950-68723050 |
| chr18 | 69357450 | 69357550 | 1151-Lng-A-T | 292  | chr18:69357450-69357550 |
| chr18 | 69446650 | 69446750 | 1065-Lng-B-T | 589  | chr18:69446650-69446750 |
| chr18 | 69538350 | 69538450 | 1090-Lng-B-T | 287  | chr18:69538350-69538450 |
| chr18 | 69538450 | 69538550 | 1152-Lng-A-T | 133  | chr18:69538450-69538550 |
| chr18 | 69549550 | 69549650 | 1072-Lng-A-T | 54   | chr18:69549550-69549650 |
| chr18 | 69638750 | 69638850 | 1223-Lng-A-T | 1245 | chr18:69638750-69638850 |
| chr18 | 69652650 | 69652750 | 1065-Lng-A-T | 44   | chr18:69652650-69652750 |
| chr18 | 69669850 | 69669950 | 1223-Lng-B-T | 73   | chr18:69669850-69669950 |
| chr18 | 69711750 | 69711850 | 1223-Lng-B-T | 49   | chr18:69711750-69711850 |
| chr18 | 69753750 | 69753850 | 901-Lng-A-T  | 107  | chr18:69753750-69753850 |
| chr18 | 69995950 | 69996050 | 1065-Lng-C-T | 92   | chr18:69995950-69996050 |
| chr18 | 70146150 | 70146250 | 1274-Lng-A-T | 146  | chr18:70146150-70146250 |
| chr18 | 70187850 | 70187950 | 1274-Lng-A-T | 56   | chr18:70187850-70187950 |
| chr18 | 70201750 | 70201850 | 1072-Lng-A-T | 119  | chr18:70201750-70201850 |
| chr18 | 70211950 | 70212050 | 1223-Lng-C-T | 465  | chr18:70211950-70212050 |
| chr18 | 70290050 | 70290150 | 1065-Lng-A-T | 51   | chr18:70290050-70290150 |
| chr18 | 70657750 | 70657850 | 901-Lng-B-T  | 225  | chr18:70657750-70657850 |
| chr18 | 70772450 | 70772550 | 1274-Lng-A-T | 1508 | chr18:70772450-70772550 |
| chr18 | 71117150 | 71117250 | 1065-Lng-B-T | 60   | chr18:71117150-71117250 |
| chr18 | 71219250 | 71219350 | 1188-Lng-A-T | 45   | chr18:71219250-71219350 |
| chr18 | 71257150 | 71257250 | 1090-Lng-A-T | 197  | chr18:71257150-71257250 |
| chr18 | 71391650 | 71391750 | 901-Lng-A-T  | 75   | chr18:71391650-71391750 |
| chr18 | 71631050 | 71631150 | 846-Lng-A-T  | 58   | chr18:71631050-71631150 |
| chr18 | 71635850 | 71635950 | 1167-Lng-A-T | 79   | chr18:71635850-71635950 |
| chr18 | 71653250 | 71653350 | 1004-Lng-A-T | 49   | chr18:71653250-71653350 |
| chr18 | 71726150 | 71726250 | 1065-Lng-A-T | 68   | chr18:71726150-71726250 |
| chr18 | 71735750 | 71735850 | 846-Lng-A-T  | 74   | chr18:71735750-71735850 |
| chr18 | 71753350 | 71753450 | 1065-Lng-C-T | 77   | chr18:71753350-71753450 |
| chr18 | 71766350 | 71766450 | 901-Lng-A-T  | 81   | chr18:71766350-71766450 |
| chr18 | 71783650 | 71783750 | 1065-Lng-C-T | 83   | chr18:71783650-71783750 |
| chr18 | 71789150 | 71789250 | 1223-Lng-B-T | 194  | chr18:71789150-71789250 |
| chr18 | 71914950 | 71915050 | 846-Lng-A-T  | 180  | chr18:71914950-71915050 |
| chr18 | 71922550 | 71922650 | 1223-Lng-D-T | 40   | chr18:71922550-71922650 |
| chr18 | 72036850 | 72036950 | 1065-Lng-C-T | 64   | chr18:72036850-72036950 |
| chr18 | 72238850 | 72238950 | 1223-Lng-A-T | 55   | chr18:72238850-72238950 |
| chr18 | 72344850 | 72344950 | 1065-Lng-A-T | 38   | chr18:72344850-72344950 |
| chr18 | 72447250 | 72447350 | 1274-Lng-A-T | 57   | chr18:72447250-72447350 |
| chr18 | 73539650 | 73539750 | 1274-Lng-A-T | 52   | chr18:73539650-73539750 |
| chr18 | 73712650 | 73712750 | 1188-Lng-A-T | 45   | chr18:73712650-73712750 |
| chr18 | 73741650 | 73741750 | 1152-Lng-A-T | 35   | chr18:73741650-73741750 |
| chr18 | 73748050 | 73748150 | 846-Lng-A-T  | 150  | chr18:73748050-73748150 |

**Table S2: SB Insertion regions**

|       |          |          |              |     |                         |
|-------|----------|----------|--------------|-----|-------------------------|
| chr18 | 73801850 | 73801950 | 1065-Lng-A-T | 44  | chr18:73801850-73801950 |
| chr18 | 73817450 | 73817550 | 901-Lng-C-T  | 78  | chr18:73817450-73817550 |
| chr18 | 73818350 | 73818450 | 1188-Lng-A-T | 136 | chr18:73818350-73818450 |
| chr18 | 73819350 | 73819450 | 1065-Lng-B-T | 76  | chr18:73819350-73819450 |
| chr18 | 73831350 | 73831450 | 1223-Lng-C-T | 87  | chr18:73831350-73831450 |
| chr18 | 73838250 | 73838350 | 1090-Lng-A-T | 89  | chr18:73838250-73838350 |
| chr18 | 73858150 | 73858250 | 1090-Lng-B-T | 570 | chr18:73858150-73858250 |
| chr18 | 73860050 | 73860150 | 1065-Lng-B-T | 44  | chr18:73860050-73860150 |
| chr18 | 73946350 | 73946450 | 1100-Lng-A-T | 121 | chr18:73946350-73946450 |
| chr18 | 74125650 | 74125750 | 1065-Lng-C-T | 112 | chr18:74125650-74125750 |
| chr18 | 74146050 | 74146150 | 1167-Lng-A-T | 192 | chr18:74146050-74146150 |
| chr18 | 74429350 | 74429450 | 901-Lng-D-T  | 372 | chr18:74429350-74429450 |
| chr18 | 74592850 | 74592950 | 901-Lng-C-T  | 51  | chr18:74592850-74592950 |
| chr18 | 74598350 | 74598450 | 901-Lng-A-T  | 66  | chr18:74598350-74598450 |
| chr18 | 74621450 | 74621550 | 1152-Lng-A-T | 33  | chr18:74621450-74621550 |
| chr18 | 74621750 | 74621850 | 1065-Lng-C-T | 136 | chr18:74621750-74621850 |
| chr18 | 74636250 | 74636350 | 846-Lng-A-T  | 70  | chr18:74636250-74636350 |
| chr18 | 74651850 | 74651950 | 846-Lng-A-T  | 77  | chr18:74651850-74651950 |
| chr18 | 74673850 | 74673950 | 1100-Lng-B-T | 268 | chr18:74673850-74673950 |
| chr18 | 74720550 | 74720650 | 1167-Lng-A-T | 82  | chr18:74720550-74720650 |
| chr18 | 74735450 | 74735550 | 901-Lng-C-T  | 45  | chr18:74735450-74735550 |
| chr18 | 74735450 | 74735550 | 1274-Lng-A-T | 70  | chr18:74735450-74735550 |
| chr18 | 74748650 | 74748750 | 901-Lng-D-T  | 75  | chr18:74748650-74748750 |
| chr18 | 74770350 | 74770450 | 1152-Lng-A-T | 90  | chr18:74770350-74770450 |
| chr18 | 74824450 | 74824550 | 1100-Lng-A-T | 52  | chr18:74824450-74824550 |
| chr18 | 74843850 | 74843950 | 1167-Lng-A-T | 61  | chr18:74843850-74843950 |
| chr18 | 74886050 | 74886150 | 1223-Lng-D-T | 45  | chr18:74886050-74886150 |
| chr18 | 75208650 | 75208750 | 1065-Lng-A-T | 47  | chr18:75208650-75208750 |
| chr18 | 75231950 | 75232050 | 1223-Lng-B-T | 39  | chr18:75231950-75232050 |
| chr18 | 75332850 | 75332950 | 1100-Lng-A-T | 52  | chr18:75332850-75332950 |
| chr18 | 75380750 | 75380850 | 1100-Lng-A-T | 59  | chr18:75380750-75380850 |
| chr18 | 75395550 | 75395650 | 1152-Lng-A-T | 141 | chr18:75395550-75395650 |
| chr18 | 75470450 | 75470550 | 1100-Lng-A-T | 93  | chr18:75470450-75470550 |
| chr18 | 75612750 | 75612850 | 1188-Lng-A-T | 46  | chr18:75612750-75612850 |
| chr18 | 75701850 | 75701950 | 901-Lng-A-T  | 160 | chr18:75701850-75701950 |
| chr18 | 75735050 | 75735150 | 1167-Lng-A-T | 249 | chr18:75735050-75735150 |
| chr18 | 76197950 | 76198050 | 901-Lng-C-T  | 57  | chr18:76197950-76198050 |
| chr18 | 76353650 | 76353750 | 901-Lng-A-T  | 53  | chr18:76353650-76353750 |
| chr18 | 76403450 | 76403550 | 1223-Lng-C-T | 164 | chr18:76403450-76403550 |
| chr18 | 76426050 | 76426150 | 1223-Lng-C-T | 318 | chr18:76426050-76426150 |
| chr18 | 76441450 | 76441550 | 901-Lng-A-T  | 59  | chr18:76441450-76441550 |
| chr18 | 76446850 | 76446950 | 1090-Lng-A-T | 53  | chr18:76446850-76446950 |
| chr18 | 76457750 | 76457850 | 1151-Lng-A-T | 79  | chr18:76457750-76457850 |
| chr18 | 76464050 | 76464150 | 1188-Lng-A-T | 181 | chr18:76464050-76464150 |
| chr18 | 76466750 | 76466850 | 901-Lng-B-T  | 378 | chr18:76466750-76466850 |
| chr18 | 76802750 | 76802850 | 1100-Lng-A-T | 55  | chr18:76802750-76802850 |

**Table S2: SB Insertion regions**

|       |          |          |              |      |                         |
|-------|----------|----------|--------------|------|-------------------------|
| chr18 | 76847450 | 76847550 | 1274-Lng-A-T | 149  | chr18:76847450-76847550 |
| chr18 | 77173450 | 77173550 | 1223-Lng-A-T | 1363 | chr18:77173450-77173550 |
| chr18 | 77214550 | 77214650 | 1004-Lng-A-T | 55   | chr18:77214550-77214650 |
| chr18 | 77259650 | 77259750 | 1223-Lng-A-T | 150  | chr18:77259650-77259750 |
| chr18 | 77335650 | 77335750 | 1065-Lng-A-T | 102  | chr18:77335650-77335750 |
| chr18 | 77828750 | 77828850 | 846-Lng-A-T  | 154  | chr18:77828750-77828850 |
| chr18 | 77900650 | 77900750 | 1223-Lng-B-T | 35   | chr18:77900650-77900750 |
| chr18 | 77901650 | 77901750 | 1152-Lng-A-T | 141  | chr18:77901650-77901750 |
| chr18 | 77911250 | 77911350 | 1065-Lng-A-T | 103  | chr18:77911250-77911350 |
| chr18 | 77931550 | 77931650 | 1223-Lng-D-T | 193  | chr18:77931550-77931650 |
| chr18 | 77938650 | 77938750 | 1223-Lng-B-T | 34   | chr18:77938650-77938750 |
| chr18 | 78022450 | 78022550 | 901-Lng-B-T  | 203  | chr18:78022450-78022550 |
| chr18 | 78130450 | 78130550 | 846-Lng-A-T  | 62   | chr18:78130450-78130550 |
| chr18 | 78134550 | 78134650 | 1100-Lng-A-T | 135  | chr18:78134550-78134650 |
| chr18 | 78346950 | 78347050 | 901-Lng-C-T  | 206  | chr18:78346950-78347050 |
| chr18 | 78361450 | 78361550 | 901-Lng-D-T  | 388  | chr18:78361450-78361550 |
| chr18 | 78425550 | 78425650 | 1072-Lng-A-T | 64   | chr18:78425550-78425650 |
| chr18 | 78430050 | 78430150 | 1223-Lng-C-T | 47   | chr18:78430050-78430150 |
| chr18 | 78470950 | 78471050 | 1223-Lng-A-T | 69   | chr18:78470950-78471050 |
| chr18 | 78644250 | 78644350 | 1223-Lng-C-T | 59   | chr18:78644250-78644350 |
| chr18 | 78856950 | 78857050 | 1065-Lng-B-T | 44   | chr18:78856950-78857050 |
| chr18 | 78863250 | 78863350 | 1223-Lng-C-T | 46   | chr18:78863250-78863350 |
| chr18 | 78981650 | 78981750 | 1167-Lng-A-T | 91   | chr18:78981650-78981750 |
| chr18 | 79037250 | 79037350 | 901-Lng-A-T  | 56   | chr18:79037250-79037350 |
| chr18 | 79068350 | 79068450 | 1188-Lng-A-T | 265  | chr18:79068350-79068450 |
| chr18 | 79103350 | 79103450 | 901-Lng-A-T  | 80   | chr18:79103350-79103450 |
| chr18 | 79160450 | 79160550 | 1065-Lng-A-T | 53   | chr18:79160450-79160550 |
| chr18 | 79171350 | 79171450 | 1223-Lng-B-T | 94   | chr18:79171350-79171450 |
| chr18 | 79240650 | 79240750 | 1065-Lng-C-T | 65   | chr18:79240650-79240750 |
| chr18 | 79242750 | 79242850 | 1152-Lng-A-T | 44   | chr18:79242750-79242850 |
| chr18 | 79283150 | 79283250 | 1188-Lng-A-T | 131  | chr18:79283150-79283250 |
| chr18 | 79400650 | 79400750 | 1223-Lng-C-T | 54   | chr18:79400650-79400750 |
| chr18 | 79599450 | 79599550 | 1167-Lng-A-T | 137  | chr18:79599450-79599550 |
| chr18 | 79605150 | 79605250 | 901-Lng-B-T  | 180  | chr18:79605150-79605250 |
| chr18 | 79809350 | 79809450 | 1065-Lng-C-T | 91   | chr18:79809350-79809450 |
| chr18 | 80021950 | 80022050 | 1065-Lng-B-T | 277  | chr18:80021950-80022050 |
| chr18 | 80345450 | 80345550 | 1274-Lng-A-T | 56   | chr18:80345450-80345550 |
| chr18 | 80476850 | 80476950 | 1065-Lng-A-T | 72   | chr18:80476850-80476950 |
| chr18 | 80606350 | 80606450 | 1274-Lng-A-T | 119  | chr18:80606350-80606450 |
| chr18 | 80612850 | 80612950 | 1100-Lng-A-T | 66   | chr18:80612850-80612950 |
| chr18 | 80750250 | 80750350 | 1274-Lng-A-T | 50   | chr18:80750250-80750350 |
| chr18 | 80770850 | 80770950 | 1065-Lng-A-T | 94   | chr18:80770850-80770950 |
| chr18 | 80820950 | 80821050 | 1188-Lng-A-T | 167  | chr18:80820950-80821050 |
| chr18 | 80859350 | 80859450 | 1223-Lng-B-T | 39   | chr18:80859350-80859450 |
| chr18 | 80916750 | 80916850 | 1004-Lng-A-T | 50   | chr18:80916750-80916850 |
| chr18 | 80963250 | 80963350 | 1188-Lng-A-T | 45   | chr18:80963250-80963350 |



**Table S2: SB Insertion regions**

|       |          |          |              |     |                         |
|-------|----------|----------|--------------|-----|-------------------------|
| chr18 | 81044350 | 81044450 | 901-Lng-A-T  | 123 | chr18:81044350-81044450 |
| chr18 | 81049750 | 81049850 | 1223-Lng-B-T | 41  | chr18:81049750-81049850 |
| chr18 | 81071750 | 81071850 | 1223-Lng-C-T | 119 | chr18:81071750-81071850 |
| chr18 | 81088350 | 81088450 | 1065-Lng-C-T | 114 | chr18:81088350-81088450 |
| chr18 | 81092050 | 81092150 | 1152-Lng-A-T | 85  | chr18:81092050-81092150 |
| chr18 | 81106550 | 81106650 | 1223-Lng-C-T | 70  | chr18:81106550-81106650 |
| chr18 | 81145550 | 81145650 | 1090-Lng-B-T | 234 | chr18:81145550-81145650 |
| chr18 | 81249650 | 81249750 | 901-Lng-B-T  | 154 | chr18:81249650-81249750 |
| chr18 | 81722850 | 81722950 | 846-Lng-A-T  | 127 | chr18:81722850-81722950 |
| chr18 | 82063750 | 82063850 | 1065-Lng-B-T | 64  | chr18:82063750-82063850 |
| chr18 | 82426850 | 82426950 | 1065-Lng-C-T | 80  | chr18:82426850-82426950 |
| chr18 | 82532050 | 82532150 | 1065-Lng-B-T | 59  | chr18:82532050-82532150 |
| chr18 | 82654850 | 82654950 | 901-Lng-D-T  | 118 | chr18:82654850-82654950 |
| chr18 | 82696350 | 82696450 | 1151-Lng-A-T | 104 | chr18:82696350-82696450 |
| chr18 | 82708850 | 82708950 | 1167-Lng-A-T | 113 | chr18:82708850-82708950 |
| chr18 | 82783550 | 82783650 | 1065-Lng-A-T | 57  | chr18:82783550-82783650 |
| chr18 | 82851050 | 82851150 | 901-Lng-B-T  | 59  | chr18:82851050-82851150 |
| chr18 | 82921150 | 82921250 | 1065-Lng-B-T | 325 | chr18:82921150-82921250 |
| chr18 | 83005550 | 83005650 | 1188-Lng-A-T | 142 | chr18:83005550-83005650 |
| chr18 | 83102250 | 83102350 | 1188-Lng-A-T | 88  | chr18:83102250-83102350 |
| chr18 | 83102350 | 83102450 | 1004-Lng-A-T | 79  | chr18:83102350-83102450 |
| chr18 | 83154450 | 83154550 | 1065-Lng-B-T | 70  | chr18:83154450-83154550 |
| chr18 | 83194950 | 83195050 | 1090-Lng-A-T | 91  | chr18:83194950-83195050 |
| chr18 | 83226350 | 83226450 | 846-Lng-A-T  | 79  | chr18:83226350-83226450 |
| chr18 | 83296050 | 83296150 | 1167-Lng-A-T | 68  | chr18:83296050-83296150 |
| chr18 | 83353950 | 83354050 | 1223-Lng-C-T | 325 | chr18:83353950-83354050 |
| chr18 | 83715450 | 83715550 | 1152-Lng-A-T | 57  | chr18:83715450-83715550 |
| chr18 | 83749850 | 83749950 | 1072-Lng-A-T | 229 | chr18:83749850-83749950 |
| chr18 | 83906750 | 83906850 | 846-Lng-A-T  | 81  | chr18:83906750-83906850 |
| chr18 | 84261350 | 84261450 | 901-Lng-B-T  | 139 | chr18:84261350-84261450 |
| chr18 | 84266050 | 84266150 | 1100-Lng-A-T | 69  | chr18:84266050-84266150 |
| chr18 | 84466450 | 84466550 | 1090-Lng-A-T | 87  | chr18:84466450-84466550 |
| chr18 | 84486550 | 84486650 | 1223-Lng-D-T | 45  | chr18:84486550-84486650 |
| chr18 | 84568850 | 84568950 | 1223-Lng-D-T | 98  | chr18:84568850-84568950 |
| chr18 | 84608050 | 84608150 | 1274-Lng-A-T | 58  | chr18:84608050-84608150 |
| chr18 | 84624450 | 84624550 | 1004-Lng-A-T | 106 | chr18:84624450-84624550 |
| chr18 | 84631950 | 84632050 | 901-Lng-B-T  | 147 | chr18:84631950-84632050 |
| chr18 | 84717750 | 84717850 | 1090-Lng-A-T | 127 | chr18:84717750-84717850 |
| chr18 | 84903550 | 84903650 | 1072-Lng-A-T | 51  | chr18:84903550-84903650 |
| chr18 | 84950650 | 84950750 | 1004-Lng-A-T | 67  | chr18:84950650-84950750 |
| chr18 | 84954650 | 84954750 | 1188-Lng-A-T | 195 | chr18:84954650-84954750 |
| chr18 | 85053650 | 85053750 | 1100-Lng-A-T | 475 | chr18:85053650-85053750 |
| chr18 | 85304150 | 85304250 | 1274-Lng-A-T | 54  | chr18:85304150-85304250 |
| chr18 | 85600450 | 85600550 | 1223-Lng-C-T | 45  | chr18:85600450-85600550 |
| chr18 | 85819350 | 85819450 | 1072-Lng-A-T | 53  | chr18:85819350-85819450 |
| chr18 | 86225750 | 86225850 | 1223-Lng-A-T | 178 | chr18:86225750-86225850 |

**Table S2: SB Insertion regions**

|       |          |          |              |      |                         |
|-------|----------|----------|--------------|------|-------------------------|
| chr18 | 86465250 | 86465350 | 1004-Lng-A-T | 72   | chr18:86465250-86465350 |
| chr18 | 86496050 | 86496150 | 901-Lng-A-T  | 54   | chr18:86496050-86496150 |
| chr18 | 86600450 | 86600550 | 1274-Lng-A-T | 83   | chr18:86600450-86600550 |
| chr18 | 86718250 | 86718350 | 1065-Lng-C-T | 63   | chr18:86718250-86718350 |
| chr18 | 86836950 | 86837050 | 1152-Lng-A-T | 101  | chr18:86836950-86837050 |
| chr18 | 86837950 | 86838050 | 1072-Lng-A-T | 89   | chr18:86837950-86838050 |
| chr18 | 86912650 | 86912750 | 1065-Lng-C-T | 82   | chr18:86912650-86912750 |
| chr18 | 86913950 | 86914050 | 1090-Lng-A-T | 111  | chr18:86913950-86914050 |
| chr18 | 86995350 | 86995450 | 1152-Lng-A-T | 57   | chr18:86995350-86995450 |
| chr18 | 87171250 | 87171350 | 901-Lng-C-T  | 42   | chr18:87171250-87171350 |
| chr18 | 87219850 | 87219950 | 1152-Lng-A-T | 48   | chr18:87219850-87219950 |
| chr18 | 87312450 | 87312550 | 1223-Lng-A-T | 1185 | chr18:87312450-87312550 |
| chr18 | 87506850 | 87506950 | 1100-Lng-A-T | 56   | chr18:87506850-87506950 |
| chr18 | 87564150 | 87564250 | 1152-Lng-A-T | 121  | chr18:87564150-87564250 |
| chr18 | 87638850 | 87638950 | 901-Lng-C-T  | 33   | chr18:87638850-87638950 |
| chr18 | 87870050 | 87870150 | 1188-Lng-A-T | 190  | chr18:87870050-87870150 |
| chr18 | 88133450 | 88133550 | 1223-Lng-B-T | 218  | chr18:88133450-88133550 |
| chr18 | 88231250 | 88231350 | 901-Lng-B-T  | 250  | chr18:88231250-88231350 |
| chr18 | 88236350 | 88236450 | 1072-Lng-A-T | 110  | chr18:88236350-88236450 |
| chr18 | 88279350 | 88279450 | 1188-Lng-A-T | 35   | chr18:88279350-88279450 |
| chr18 | 88306050 | 88306150 | 1065-Lng-B-T | 224  | chr18:88306050-88306150 |
| chr18 | 88368350 | 88368450 | 901-Lng-D-T  | 349  | chr18:88368350-88368450 |
| chr18 | 88547250 | 88547350 | 1065-Lng-A-T | 52   | chr18:88547250-88547350 |
| chr18 | 88574350 | 88574450 | 1152-Lng-A-T | 74   | chr18:88574350-88574450 |
| chr18 | 88616150 | 88616250 | 1072-Lng-A-T | 119  | chr18:88616150-88616250 |
| chr18 | 88655050 | 88655150 | 846-Lng-A-T  | 69   | chr18:88655050-88655150 |
| chr18 | 88822550 | 88822650 | 901-Lng-C-T  | 70   | chr18:88822550-88822650 |
| chr18 | 88859350 | 88859450 | 1223-Lng-C-T | 44   | chr18:88859350-88859450 |
| chr18 | 88957650 | 88957750 | 846-Lng-A-T  | 658  | chr18:88957650-88957750 |
| chr18 | 89031350 | 89031450 | 901-Lng-B-T  | 171  | chr18:89031350-89031450 |
| chr18 | 89040750 | 89040850 | 1223-Lng-A-T | 164  | chr18:89040750-89040850 |
| chr18 | 89069950 | 89070050 | 1100-Lng-B-T | 80   | chr18:89069950-89070050 |
| chr18 | 89242450 | 89242550 | 1065-Lng-A-T | 38   | chr18:89242450-89242550 |
| chr18 | 89329550 | 89329650 | 901-Lng-A-T  | 55   | chr18:89329550-89329650 |
| chr18 | 89373050 | 89373150 | 901-Lng-D-T  | 202  | chr18:89373050-89373150 |
| chr18 | 89396250 | 89396350 | 901-Lng-D-T  | 156  | chr18:89396250-89396350 |
| chr18 | 89430850 | 89430950 | 901-Lng-C-T  | 155  | chr18:89430850-89430950 |
| chr18 | 89550950 | 89551050 | 901-Lng-A-T  | 81   | chr18:89550950-89551050 |
| chr18 | 89716450 | 89716550 | 1004-Lng-A-T | 54   | chr18:89716450-89716550 |
| chr18 | 89816750 | 89816850 | 1090-Lng-A-T | 97   | chr18:89816750-89816850 |
| chr18 | 89832650 | 89832750 | 901-Lng-A-T  | 102  | chr18:89832650-89832750 |
| chr18 | 89840750 | 89840850 | 901-Lng-D-T  | 359  | chr18:89840750-89840850 |
| chr18 | 89933450 | 89933550 | 901-Lng-A-T  | 79   | chr18:89933450-89933550 |
| chr18 | 90018950 | 90019050 | 1004-Lng-A-T | 98   | chr18:90018950-90019050 |
| chr18 | 90089850 | 90089950 | 901-Lng-B-T  | 160  | chr18:90089850-90089950 |
| chr18 | 90142350 | 90142450 | 1223-Lng-C-T | 54   | chr18:90142350-90142450 |

**Table S2: SB Insertion regions**

|       |          |          |              |     |                         |
|-------|----------|----------|--------------|-----|-------------------------|
| chr18 | 90144250 | 90144350 | 1274-Lng-A-T | 57  | chr18:90144250-90144350 |
| chr18 | 90305050 | 90305150 | 1090-Lng-A-T | 61  | chr18:90305050-90305150 |
| chr18 | 90308750 | 90308850 | 1065-Lng-B-T | 102 | chr18:90308750-90308850 |
| chr18 | 90350450 | 90350550 | 1188-Lng-A-T | 38  | chr18:90350450-90350550 |
| chr18 | 90414450 | 90414550 | 1065-Lng-A-T | 105 | chr18:90414450-90414550 |
| chr18 | 90442950 | 90443050 | 1223-Lng-A-T | 69  | chr18:90442950-90443050 |
| chr18 | 90455250 | 90455350 | 1188-Lng-A-T | 41  | chr18:90455250-90455350 |
| chr19 | 3324650  | 3324750  | 1151-Lng-A-T | 518 | chr19:3324650-3324750   |
| chr19 | 3471550  | 3471650  | 846-Lng-A-T  | 99  | chr19:3471550-3471650   |
| chr19 | 3492050  | 3492150  | 1152-Lng-A-T | 80  | chr19:3492050-3492150   |
| chr19 | 3508550  | 3508650  | 1100-Lng-A-T | 106 | chr19:3508550-3508650   |
| chr19 | 3529950  | 3530050  | 1100-Lng-A-T | 52  | chr19:3529950-3530050   |
| chr19 | 3535850  | 3535950  | 1223-Lng-D-T | 41  | chr19:3535850-3535950   |
| chr19 | 3541050  | 3541150  | 1065-Lng-B-T | 97  | chr19:3541050-3541150   |
| chr19 | 3550850  | 3550950  | 901-Lng-A-T  | 76  | chr19:3550850-3550950   |
| chr19 | 3612650  | 3612750  | 1072-Lng-A-T | 110 | chr19:3612650-3612750   |
| chr19 | 3662650  | 3662750  | 846-Lng-A-T  | 130 | chr19:3662650-3662750   |
| chr19 | 3665750  | 3665850  | 901-Lng-D-T  | 88  | chr19:3665750-3665850   |
| chr19 | 3736850  | 3736950  | 1065-Lng-A-T | 92  | chr19:3736850-3736950   |
| chr19 | 3819750  | 3819850  | 1223-Lng-A-T | 460 | chr19:3819750-3819850   |
| chr19 | 4012950  | 4013050  | 1152-Lng-A-T | 315 | chr19:4012950-4013050   |
| chr19 | 4088650  | 4088750  | 901-Lng-A-T  | 58  | chr19:4088650-4088750   |
| chr19 | 4298550  | 4298650  | 1152-Lng-A-T | 35  | chr19:4298550-4298650   |
| chr19 | 4301550  | 4301650  | 846-Lng-A-T  | 210 | chr19:4301550-4301650   |
| chr19 | 4345150  | 4345250  | 1188-Lng-A-T | 86  | chr19:4345150-4345250   |
| chr19 | 4373450  | 4373550  | 1065-Lng-A-T | 50  | chr19:4373450-4373550   |
| chr19 | 4394050  | 4394150  | 1188-Lng-A-T | 40  | chr19:4394050-4394150   |
| chr19 | 4576150  | 4576250  | 1072-Lng-A-T | 257 | chr19:4576150-4576250   |
| chr19 | 4588050  | 4588150  | 901-Lng-A-T  | 88  | chr19:4588050-4588150   |
| chr19 | 4610350  | 4610450  | 1223-Lng-D-T | 51  | chr19:4610350-4610450   |
| chr19 | 4626350  | 4626450  | 1065-Lng-A-T | 43  | chr19:4626350-4626450   |
| chr19 | 4700650  | 4700750  | 1151-Lng-A-T | 80  | chr19:4700650-4700750   |
| chr19 | 4711550  | 4711650  | 1065-Lng-A-T | 50  | chr19:4711550-4711650   |
| chr19 | 4761650  | 4761750  | 1274-Lng-A-T | 169 | chr19:4761650-4761750   |
| chr19 | 4773550  | 4773650  | 1152-Lng-A-T | 264 | chr19:4773550-4773650   |
| chr19 | 4884350  | 4884450  | 1223-Lng-D-T | 49  | chr19:4884350-4884450   |
| chr19 | 4907350  | 4907450  | 1072-Lng-A-T | 124 | chr19:4907350-4907450   |
| chr19 | 5149950  | 5150050  | 901-Lng-A-T  | 81  | chr19:5149950-5150050   |
| chr19 | 5225650  | 5225750  | 901-Lng-B-T  | 79  | chr19:5225650-5225750   |
| chr19 | 5270850  | 5270950  | 1274-Lng-A-T | 162 | chr19:5270850-5270950   |
| chr19 | 5376850  | 5376950  | 1152-Lng-A-T | 66  | chr19:5376850-5376950   |
| chr19 | 5398750  | 5398850  | 1004-Lng-A-T | 51  | chr19:5398750-5398850   |
| chr19 | 5566150  | 5566250  | 1223-Lng-B-T | 92  | chr19:5566150-5566250   |
| chr19 | 5612450  | 5612550  | 1090-Lng-A-T | 53  | chr19:5612450-5612550   |
| chr19 | 5936550  | 5936650  | 1100-Lng-A-T | 74  | chr19:5936550-5936650   |
| chr19 | 5955950  | 5956050  | 901-Lng-C-T  | 37  | chr19:5955950-5956050   |

**Table S2: SB Insertion regions**

|       |          |          |              |       |                         |
|-------|----------|----------|--------------|-------|-------------------------|
| chr19 | 6043750  | 6043850  | 1004-Lng-A-T | 50    | chr19:6043750-6043850   |
| chr19 | 6092950  | 6093050  | 1004-Lng-A-T | 75    | chr19:6092950-6093050   |
| chr19 | 6376650  | 6376750  | 1152-Lng-A-T | 40    | chr19:6376650-6376750   |
| chr19 | 6654150  | 6654250  | 901-Lng-B-T  | 235   | chr19:6654150-6654250   |
| chr19 | 6981050  | 6981150  | 1100-Lng-A-T | 102   | chr19:6981050-6981150   |
| chr19 | 7057550  | 7057650  | 846-Lng-A-T  | 88    | chr19:7057550-7057650   |
| chr19 | 7086850  | 7086950  | 901-Lng-D-T  | 287   | chr19:7086850-7086950   |
| chr19 | 7099850  | 7099950  | 1090-Lng-A-T | 53    | chr19:7099850-7099950   |
| chr19 | 7130950  | 7131050  | 1223-Lng-B-T | 178   | chr19:7130950-7131050   |
| chr19 | 7168750  | 7168850  | 901-Lng-C-T  | 31    | chr19:7168750-7168850   |
| chr19 | 7230450  | 7230550  | 1152-Lng-A-T | 50    | chr19:7230450-7230550   |
| chr19 | 7287750  | 7287850  | 1223-Lng-A-T | 1824  | chr19:7287750-7287850   |
| chr19 | 7536450  | 7536550  | 1090-Lng-A-T | 82    | chr19:7536450-7536550   |
| chr19 | 7544850  | 7544950  | 1188-Lng-A-T | 2082  | chr19:7544850-7544950   |
| chr19 | 7571050  | 7571150  | 1090-Lng-B-T | 74    | chr19:7571050-7571150   |
| chr19 | 7579950  | 7580050  | 1167-Lng-A-T | 51    | chr19:7579950-7580050   |
| chr19 | 7603250  | 7603350  | 1188-Lng-A-T | 34    | chr19:7603250-7603350   |
| chr19 | 7642450  | 7642550  | 1065-Lng-B-T | 59    | chr19:7642450-7642550   |
| chr19 | 7646050  | 7646150  | 901-Lng-C-T  | 37    | chr19:7646050-7646150   |
| chr19 | 7655150  | 7655250  | 1167-Lng-A-T | 66    | chr19:7655150-7655250   |
| chr19 | 8125750  | 8125850  | 1188-Lng-A-T | 35    | chr19:8125750-8125850   |
| chr19 | 8156150  | 8156250  | 1065-Lng-C-T | 70    | chr19:8156150-8156250   |
| chr19 | 8511150  | 8511250  | 1223-Lng-B-T | 39    | chr19:8511150-8511250   |
| chr19 | 8715950  | 8716050  | 1188-Lng-A-T | 109   | chr19:8715950-8716050   |
| chr19 | 8784450  | 8784550  | 1100-Lng-A-T | 303   | chr19:8784450-8784550   |
| chr19 | 8785250  | 8785350  | 1100-Lng-B-T | 79    | chr19:8785250-8785350   |
| chr19 | 8837650  | 8837750  | 1274-Lng-A-T | 62    | chr19:8837650-8837750   |
| chr19 | 9046750  | 9046850  | 1167-Lng-A-T | 160   | chr19:9046750-9046850   |
| chr19 | 9093450  | 9093550  | 1065-Lng-A-T | 69    | chr19:9093450-9093550   |
| chr19 | 9097450  | 9097550  | 901-Lng-B-T  | 243   | chr19:9097450-9097550   |
| chr19 | 9106550  | 9106650  | 1223-Lng-B-T | 228   | chr19:9106550-9106650   |
| chr19 | 9115750  | 9115850  | 1072-Lng-A-T | 152   | chr19:9115750-9115850   |
| chr19 | 9144650  | 9144750  | 1100-Lng-A-T | 60    | chr19:9144650-9144750   |
| chr19 | 9149450  | 9149550  | 1274-Lng-A-T | 186   | chr19:9149450-9149550   |
| chr19 | 9170950  | 9171050  | 1223-Lng-C-T | 249   | chr19:9170950-9171050   |
| chr19 | 9336950  | 9337050  | 1100-Lng-A-T | 99    | chr19:9336950-9337050   |
| chr19 | 9387750  | 9387850  | 1065-Lng-B-T | 79    | chr19:9387750-9387850   |
| chr19 | 9525650  | 9525750  | 846-Lng-A-T  | 114   | chr19:9525650-9525750   |
| chr19 | 9771250  | 9771350  | 1065-Lng-C-T | 861   | chr19:9771250-9771350   |
| chr19 | 10154850 | 10154950 | 1004-Lng-A-T | 84    | chr19:10154850-10154950 |
| chr19 | 10374850 | 10374950 | 1151-Lng-A-T | 325   | chr19:10374850-10374950 |
| chr19 | 10586850 | 10586950 | 846-Lng-A-T  | 48    | chr19:10586850-10586950 |
| chr19 | 10648550 | 10648650 | 1100-Lng-A-T | 59    | chr19:10648550-10648650 |
| chr19 | 10686250 | 10686350 | 1223-Lng-C-T | 53    | chr19:10686250-10686350 |
| chr19 | 10694450 | 10694550 | 1223-Lng-B-T | 41    | chr19:10694450-10694550 |
| chr19 | 10768350 | 10768450 | 1100-Lng-B-T | 11327 | chr19:10768350-10768450 |

**Table S2: SB Insertion regions**

|       |          |          |              |     |                         |
|-------|----------|----------|--------------|-----|-------------------------|
| chr19 | 10784250 | 10784350 | 901-Lng-A-T  | 108 | chr19:10784250-10784350 |
| chr19 | 10890750 | 10890850 | 901-Lng-B-T  | 57  | chr19:10890750-10890850 |
| chr19 | 11082150 | 11082250 | 1223-Lng-A-T | 101 | chr19:11082150-11082250 |
| chr19 | 11194350 | 11194450 | 1152-Lng-A-T | 85  | chr19:11194350-11194450 |
| chr19 | 11233450 | 11233550 | 1223-Lng-B-T | 56  | chr19:11233450-11233550 |
| chr19 | 11306350 | 11306450 | 1065-Lng-B-T | 84  | chr19:11306350-11306450 |
| chr19 | 11480150 | 11480250 | 1065-Lng-C-T | 63  | chr19:11480150-11480250 |
| chr19 | 11800750 | 11800850 | 1004-Lng-A-T | 83  | chr19:11800750-11800850 |
| chr19 | 11810350 | 11810450 | 1152-Lng-A-T | 37  | chr19:11810350-11810450 |
| chr19 | 11884650 | 11884750 | 901-Lng-D-T  | 258 | chr19:11884650-11884750 |
| chr19 | 11947150 | 11947250 | 1152-Lng-A-T | 104 | chr19:11947150-11947250 |
| chr19 | 11959150 | 11959250 | 1004-Lng-A-T | 77  | chr19:11959150-11959250 |
| chr19 | 11996850 | 11996950 | 1274-Lng-A-T | 58  | chr19:11996850-11996950 |
| chr19 | 12024050 | 12024150 | 901-Lng-C-T  | 69  | chr19:12024050-12024150 |
| chr19 | 12041750 | 12041850 | 1100-Lng-A-T | 158 | chr19:12041750-12041850 |
| chr19 | 12052150 | 12052250 | 1065-Lng-B-T | 44  | chr19:12052150-12052250 |
| chr19 | 12128550 | 12128650 | 1065-Lng-C-T | 80  | chr19:12128550-12128650 |
| chr19 | 12556850 | 12556950 | 1223-Lng-C-T | 117 | chr19:12556850-12556950 |
| chr19 | 12607250 | 12607350 | 846-Lng-A-T  | 138 | chr19:12607250-12607350 |
| chr19 | 12844150 | 12844250 | 1223-Lng-A-T | 836 | chr19:12844150-12844250 |
| chr19 | 12858250 | 12858350 | 1274-Lng-A-T | 140 | chr19:12858250-12858350 |
| chr19 | 12864350 | 12864450 | 1152-Lng-A-T | 249 | chr19:12864350-12864450 |
| chr19 | 12897850 | 12897950 | 1065-Lng-B-T | 62  | chr19:12897850-12897950 |
| chr19 | 13018050 | 13018150 | 1090-Lng-B-T | 268 | chr19:13018050-13018150 |
| chr19 | 13437050 | 13437150 | 1274-Lng-A-T | 64  | chr19:13437050-13437150 |
| chr19 | 13458350 | 13458450 | 901-Lng-C-T  | 81  | chr19:13458350-13458450 |
| chr19 | 13637750 | 13637850 | 901-Lng-C-T  | 34  | chr19:13637750-13637850 |
| chr19 | 14195850 | 14195950 | 1152-Lng-A-T | 55  | chr19:14195850-14195950 |
| chr19 | 14232050 | 14232150 | 1223-Lng-C-T | 79  | chr19:14232050-14232150 |
| chr19 | 14236950 | 14237050 | 901-Lng-A-T  | 70  | chr19:14236950-14237050 |
| chr19 | 14283750 | 14283850 | 1065-Lng-C-T | 110 | chr19:14283750-14283850 |
| chr19 | 14364550 | 14364650 | 1090-Lng-A-T | 56  | chr19:14364550-14364650 |
| chr19 | 14497950 | 14498050 | 1274-Lng-A-T | 60  | chr19:14497950-14498050 |
| chr19 | 14553950 | 14554050 | 1188-Lng-A-T | 92  | chr19:14553950-14554050 |
| chr19 | 14560350 | 14560450 | 1004-Lng-A-T | 51  | chr19:14560350-14560450 |
| chr19 | 14571050 | 14571150 | 1065-Lng-B-T | 62  | chr19:14571050-14571150 |
| chr19 | 14616350 | 14616450 | 901-Lng-A-T  | 119 | chr19:14616350-14616450 |
| chr19 | 14626450 | 14626550 | 1274-Lng-A-T | 152 | chr19:14626450-14626550 |
| chr19 | 14636250 | 14636350 | 1072-Lng-A-T | 77  | chr19:14636250-14636350 |
| chr19 | 14646750 | 14646850 | 1223-Lng-B-T | 252 | chr19:14646750-14646850 |
| chr19 | 14647450 | 14647550 | 901-Lng-C-T  | 31  | chr19:14647450-14647550 |
| chr19 | 14648650 | 14648750 | 901-Lng-D-T  | 198 | chr19:14648650-14648750 |
| chr19 | 14669350 | 14669450 | 1090-Lng-A-T | 65  | chr19:14669350-14669450 |
| chr19 | 14824950 | 14825050 | 1065-Lng-A-T | 42  | chr19:14824950-14825050 |
| chr19 | 14826050 | 14826150 | 1100-Lng-A-T | 100 | chr19:14826050-14826150 |
| chr19 | 15431450 | 15431550 | 1223-Lng-B-T | 42  | chr19:15431450-15431550 |

**Table S2: SB Insertion regions**

|       |          |          |              |     |                         |
|-------|----------|----------|--------------|-----|-------------------------|
| chr19 | 15684250 | 15684350 | 1274-Lng-A-T | 159 | chr19:15684250-15684350 |
| chr19 | 15798350 | 15798450 | 1065-Lng-A-T | 50  | chr19:15798350-15798450 |
| chr19 | 16222250 | 16222350 | 1100-Lng-A-T | 71  | chr19:16222250-16222350 |
| chr19 | 16255050 | 16255150 | 1151-Lng-A-T | 55  | chr19:16255050-16255150 |
| chr19 | 16263750 | 16263850 | 1152-Lng-A-T | 83  | chr19:16263750-16263850 |
| chr19 | 16267350 | 16267450 | 1065-Lng-B-T | 98  | chr19:16267350-16267450 |
| chr19 | 16320550 | 16320650 | 1065-Lng-B-T | 50  | chr19:16320550-16320650 |
| chr19 | 16329050 | 16329150 | 1152-Lng-A-T | 112 | chr19:16329050-16329150 |
| chr19 | 16335950 | 16336050 | 1100-Lng-A-T | 64  | chr19:16335950-16336050 |
| chr19 | 16415050 | 16415150 | 901-Lng-A-T  | 91  | chr19:16415050-16415150 |
| chr19 | 16436050 | 16436150 | 1151-Lng-A-T | 74  | chr19:16436050-16436150 |
| chr19 | 16441150 | 16441250 | 1065-Lng-A-T | 105 | chr19:16441150-16441250 |
| chr19 | 16456250 | 16456350 | 1167-Lng-A-T | 45  | chr19:16456250-16456350 |
| chr19 | 16457550 | 16457650 | 1151-Lng-A-T | 459 | chr19:16457550-16457650 |
| chr19 | 16516150 | 16516250 | 1223-Lng-B-T | 227 | chr19:16516150-16516250 |
| chr19 | 16685450 | 16685550 | 1152-Lng-A-T | 251 | chr19:16685450-16685550 |
| chr19 | 17049750 | 17049850 | 1065-Lng-C-T | 62  | chr19:17049750-17049850 |
| chr19 | 17283950 | 17284050 | 1152-Lng-A-T | 110 | chr19:17283950-17284050 |
| chr19 | 17320250 | 17320350 | 901-Lng-C-T  | 32  | chr19:17320250-17320350 |
| chr19 | 17643150 | 17643250 | 1065-Lng-A-T | 54  | chr19:17643150-17643250 |
| chr19 | 17672750 | 17672850 | 1090-Lng-A-T | 88  | chr19:17672750-17672850 |
| chr19 | 17951850 | 17951950 | 1100-Lng-A-T | 77  | chr19:17951850-17951950 |
| chr19 | 18112250 | 18112350 | 1100-Lng-A-T | 114 | chr19:18112250-18112350 |
| chr19 | 18188550 | 18188650 | 1223-Lng-A-T | 165 | chr19:18188550-18188650 |
| chr19 | 18460350 | 18460450 | 1223-Lng-B-T | 36  | chr19:18460350-18460450 |
| chr19 | 18648750 | 18648850 | 1223-Lng-C-T | 47  | chr19:18648750-18648850 |
| chr19 | 18669150 | 18669250 | 1152-Lng-A-T | 38  | chr19:18669150-18669250 |
| chr19 | 18677150 | 18677250 | 901-Lng-A-T  | 72  | chr19:18677150-18677250 |
| chr19 | 18696650 | 18696750 | 1167-Lng-A-T | 50  | chr19:18696650-18696750 |
| chr19 | 18760450 | 18760550 | 1223-Lng-C-T | 47  | chr19:18760450-18760550 |
| chr19 | 18770050 | 18770150 | 1152-Lng-A-T | 236 | chr19:18770050-18770150 |
| chr19 | 18822550 | 18822650 | 1090-Lng-A-T | 79  | chr19:18822550-18822650 |
| chr19 | 18848250 | 18848350 | 901-Lng-C-T  | 67  | chr19:18848250-18848350 |
| chr19 | 18936250 | 18936350 | 1151-Lng-A-T | 58  | chr19:18936250-18936350 |
| chr19 | 18944050 | 18944150 | 1004-Lng-A-T | 100 | chr19:18944050-18944150 |
| chr19 | 18956250 | 18956350 | 1065-Lng-B-T | 41  | chr19:18956250-18956350 |
| chr19 | 18965250 | 18965350 | 901-Lng-A-T  | 101 | chr19:18965250-18965350 |
| chr19 | 19028150 | 19028250 | 1274-Lng-A-T | 75  | chr19:19028150-19028250 |
| chr19 | 19041650 | 19041750 | 1274-Lng-A-T | 59  | chr19:19041650-19041750 |
| chr19 | 19057550 | 19057650 | 1223-Lng-B-T | 90  | chr19:19057550-19057650 |
| chr19 | 19175050 | 19175150 | 1065-Lng-C-T | 71  | chr19:19175050-19175150 |
| chr19 | 19271450 | 19271550 | 1065-Lng-B-T | 260 | chr19:19271450-19271550 |
| chr19 | 19304450 | 19304550 | 1065-Lng-A-T | 44  | chr19:19304450-19304550 |
| chr19 | 19580450 | 19580550 | 1065-Lng-C-T | 90  | chr19:19580450-19580550 |
| chr19 | 19684950 | 19685050 | 901-Lng-A-T  | 92  | chr19:19684950-19685050 |
| chr19 | 19714250 | 19714350 | 1065-Lng-A-T | 74  | chr19:19714250-19714350 |

**Table S2: SB Insertion regions**

|       |          |          |              |     |                         |
|-------|----------|----------|--------------|-----|-------------------------|
| chr19 | 19837250 | 19837350 | 1065-Lng-B-T | 53  | chr19:19837250-19837350 |
| chr19 | 20131950 | 20132050 | 1065-Lng-C-T | 94  | chr19:20131950-20132050 |
| chr19 | 20167150 | 20167250 | 1223-Lng-B-T | 37  | chr19:20167150-20167250 |
| chr19 | 20234550 | 20234650 | 1152-Lng-A-T | 57  | chr19:20234550-20234650 |
| chr19 | 20242250 | 20242350 | 846-Lng-A-T  | 131 | chr19:20242250-20242350 |
| chr19 | 20448050 | 20448150 | 1065-Lng-A-T | 79  | chr19:20448050-20448150 |
| chr19 | 20624150 | 20624250 | 901-Lng-C-T  | 85  | chr19:20624150-20624250 |
| chr19 | 20767550 | 20767650 | 1188-Lng-A-T | 41  | chr19:20767550-20767650 |
| chr19 | 20771050 | 20771150 | 1065-Lng-A-T | 56  | chr19:20771050-20771150 |
| chr19 | 20800850 | 20800950 | 1065-Lng-C-T | 86  | chr19:20800850-20800950 |
| chr19 | 20802950 | 20803050 | 901-Lng-D-T  | 90  | chr19:20802950-20803050 |
| chr19 | 20897250 | 20897350 | 1065-Lng-C-T | 141 | chr19:20897250-20897350 |
| chr19 | 21024350 | 21024450 | 1223-Lng-A-T | 204 | chr19:21024350-21024450 |
| chr19 | 21098950 | 21099050 | 1065-Lng-A-T | 71  | chr19:21098950-21099050 |
| chr19 | 21232750 | 21232850 | 1004-Lng-A-T | 67  | chr19:21232750-21232850 |
| chr19 | 21350750 | 21350850 | 1151-Lng-A-T | 54  | chr19:21350750-21350850 |
| chr19 | 21355550 | 21355650 | 1151-Lng-A-T | 151 | chr19:21355550-21355650 |
| chr19 | 21453750 | 21453850 | 1072-Lng-A-T | 73  | chr19:21453750-21453850 |
| chr19 | 21586950 | 21587050 | 1004-Lng-A-T | 82  | chr19:21586950-21587050 |
| chr19 | 21670050 | 21670150 | 1072-Lng-A-T | 52  | chr19:21670050-21670150 |
| chr19 | 21716750 | 21716850 | 901-Lng-C-T  | 73  | chr19:21716750-21716850 |
| chr19 | 21730350 | 21730450 | 1004-Lng-A-T | 84  | chr19:21730350-21730450 |
| chr19 | 21736150 | 21736250 | 1065-Lng-A-T | 134 | chr19:21736150-21736250 |
| chr19 | 21736150 | 21736250 | 1065-Lng-C-T | 622 | chr19:21736150-21736250 |
| chr19 | 21737850 | 21737950 | 1065-Lng-B-T | 51  | chr19:21737850-21737950 |
| chr19 | 21838950 | 21839050 | 846-Lng-A-T  | 77  | chr19:21838950-21839050 |
| chr19 | 21845850 | 21845950 | 901-Lng-A-T  | 175 | chr19:21845850-21845950 |
| chr19 | 22157550 | 22157650 | 901-Lng-B-T  | 318 | chr19:22157550-22157650 |
| chr19 | 22526550 | 22526650 | 1065-Lng-A-T | 455 | chr19:22526550-22526650 |
| chr19 | 22548850 | 22548950 | 1223-Lng-C-T | 53  | chr19:22548850-22548950 |
| chr19 | 22555450 | 22555550 | 1065-Lng-C-T | 230 | chr19:22555450-22555550 |
| chr19 | 22768650 | 22768750 | 901-Lng-A-T  | 110 | chr19:22768650-22768750 |
| chr19 | 22822750 | 22822850 | 1065-Lng-A-T | 88  | chr19:22822750-22822850 |
| chr19 | 23005050 | 23005150 | 1188-Lng-A-T | 34  | chr19:23005050-23005150 |
| chr19 | 23065450 | 23065550 | 901-Lng-D-T  | 317 | chr19:23065450-23065550 |
| chr19 | 23101650 | 23101750 | 1072-Lng-A-T | 97  | chr19:23101650-23101750 |
| chr19 | 23131050 | 23131150 | 1072-Lng-A-T | 77  | chr19:23131050-23131150 |
| chr19 | 23136750 | 23136850 | 1065-Lng-C-T | 92  | chr19:23136750-23136850 |
| chr19 | 23179850 | 23179950 | 1188-Lng-A-T | 35  | chr19:23179850-23179950 |
| chr19 | 23228750 | 23228850 | 901-Lng-B-T  | 102 | chr19:23228750-23228850 |
| chr19 | 23280250 | 23280350 | 1151-Lng-A-T | 242 | chr19:23280250-23280350 |
| chr19 | 23320950 | 23321050 | 1223-Lng-D-T | 44  | chr19:23320950-23321050 |
| chr19 | 23445350 | 23445450 | 1223-Lng-A-T | 121 | chr19:23445350-23445450 |
| chr19 | 23469650 | 23469750 | 1090-Lng-B-T | 415 | chr19:23469650-23469750 |
| chr19 | 23482350 | 23482450 | 1090-Lng-A-T | 373 | chr19:23482350-23482450 |
| chr19 | 23640650 | 23640750 | 901-Lng-A-T  | 67  | chr19:23640650-23640750 |

**Table S2: SB Insertion regions**

|       |          |          |              |      |                         |
|-------|----------|----------|--------------|------|-------------------------|
| chr19 | 23640750 | 23640850 | 1223-Lng-C-T | 84   | chr19:23640750-23640850 |
| chr19 | 23803950 | 23804050 | 901-Lng-A-T  | 56   | chr19:23803950-23804050 |
| chr19 | 23845150 | 23845250 | 1223-Lng-C-T | 73   | chr19:23845150-23845250 |
| chr19 | 23889250 | 23889350 | 901-Lng-A-T  | 85   | chr19:23889250-23889350 |
| chr19 | 24002450 | 24002550 | 1152-Lng-A-T | 206  | chr19:24002450-24002550 |
| chr19 | 24039950 | 24040050 | 901-Lng-B-T  | 55   | chr19:24039950-24040050 |
| chr19 | 24177250 | 24177350 | 1223-Lng-A-T | 158  | chr19:24177250-24177350 |
| chr19 | 24182050 | 24182150 | 1167-Lng-A-T | 52   | chr19:24182050-24182150 |
| chr19 | 24183850 | 24183950 | 1065-Lng-A-T | 42   | chr19:24183850-24183950 |
| chr19 | 24215850 | 24215950 | 1274-Lng-A-T | 240  | chr19:24215850-24215950 |
| chr19 | 24332450 | 24332550 | 1065-Lng-C-T | 1081 | chr19:24332450-24332550 |
| chr19 | 24429150 | 24429250 | 1090-Lng-A-T | 121  | chr19:24429150-24429250 |
| chr19 | 24439850 | 24439950 | 1065-Lng-B-T | 73   | chr19:24439850-24439950 |
| chr19 | 24469250 | 24469350 | 1004-Lng-A-T | 72   | chr19:24469250-24469350 |
| chr19 | 24522250 | 24522350 | 901-Lng-C-T  | 70   | chr19:24522250-24522350 |
| chr19 | 24589750 | 24589850 | 1090-Lng-B-T | 184  | chr19:24589750-24589850 |
| chr19 | 24603550 | 24603650 | 1274-Lng-A-T | 90   | chr19:24603550-24603650 |
| chr19 | 24621450 | 24621550 | 1065-Lng-B-T | 40   | chr19:24621450-24621550 |
| chr19 | 24649250 | 24649350 | 1004-Lng-A-T | 115  | chr19:24649250-24649350 |
| chr19 | 24659950 | 24660050 | 1223-Lng-C-T | 103  | chr19:24659950-24660050 |
| chr19 | 24795650 | 24795750 | 901-Lng-B-T  | 241  | chr19:24795650-24795750 |
| chr19 | 24894950 | 24895050 | 1223-Lng-C-T | 468  | chr19:24894950-24895050 |
| chr19 | 24920250 | 24920350 | 1223-Lng-C-T | 85   | chr19:24920250-24920350 |
| chr19 | 25015950 | 25016050 | 901-Lng-A-T  | 59   | chr19:25015950-25016050 |
| chr19 | 25025050 | 25025150 | 1065-Lng-C-T | 116  | chr19:25025050-25025150 |
| chr19 | 25098850 | 25098950 | 1065-Lng-A-T | 54   | chr19:25098850-25098950 |
| chr19 | 25105150 | 25105250 | 1151-Lng-A-T | 132  | chr19:25105150-25105250 |
| chr19 | 25110150 | 25110250 | 1223-Lng-D-T | 44   | chr19:25110150-25110250 |
| chr19 | 25185050 | 25185150 | 1223-Lng-C-T | 45   | chr19:25185050-25185150 |
| chr19 | 25244650 | 25244750 | 846-Lng-A-T  | 125  | chr19:25244650-25244750 |
| chr19 | 25326750 | 25326850 | 1274-Lng-A-T | 62   | chr19:25326750-25326850 |
| chr19 | 25690950 | 25691050 | 1065-Lng-A-T | 56   | chr19:25690950-25691050 |
| chr19 | 25718750 | 25718850 | 901-Lng-A-T  | 175  | chr19:25718750-25718850 |
| chr19 | 25867050 | 25867150 | 846-Lng-A-T  | 80   | chr19:25867050-25867150 |
| chr19 | 26287950 | 26288050 | 1065-Lng-B-T | 80   | chr19:26287950-26288050 |
| chr19 | 26494650 | 26494750 | 1065-Lng-B-T | 97   | chr19:26494650-26494750 |
| chr19 | 26592750 | 26592850 | 1065-Lng-A-T | 112  | chr19:26592750-26592850 |
| chr19 | 26693950 | 26694050 | 1167-Lng-A-T | 62   | chr19:26693950-26694050 |
| chr19 | 26939850 | 26939950 | 1065-Lng-A-T | 36   | chr19:26939850-26939950 |
| chr19 | 27002950 | 27003050 | 1223-Lng-A-T | 124  | chr19:27002950-27003050 |
| chr19 | 27249050 | 27249150 | 1065-Lng-C-T | 72   | chr19:27249050-27249150 |
| chr19 | 27301550 | 27301650 | 1065-Lng-C-T | 551  | chr19:27301550-27301650 |
| chr19 | 27322050 | 27322150 | 1223-Lng-A-T | 121  | chr19:27322050-27322150 |
| chr19 | 27525150 | 27525250 | 1090-Lng-A-T | 63   | chr19:27525150-27525250 |
| chr19 | 27577450 | 27577550 | 1167-Lng-A-T | 46   | chr19:27577450-27577550 |
| chr19 | 27688550 | 27688650 | 1223-Lng-D-T | 295  | chr19:27688550-27688650 |



**Table S2: SB Insertion regions**

|       |          |          |              |      |                         |
|-------|----------|----------|--------------|------|-------------------------|
| chr19 | 27919650 | 27919750 | 1223-Lng-C-T | 58   | chr19:27919650-27919750 |
| chr19 | 27928750 | 27928850 | 901-Lng-A-T  | 79   | chr19:27928750-27928850 |
| chr19 | 27988450 | 27988550 | 1090-Lng-B-T | 195  | chr19:27988450-27988550 |
| chr19 | 28277250 | 28277350 | 1223-Lng-C-T | 54   | chr19:28277250-28277350 |
| chr19 | 28309250 | 28309350 | 1100-Lng-A-T | 175  | chr19:28309250-28309350 |
| chr19 | 28475050 | 28475150 | 1004-Lng-A-T | 51   | chr19:28475050-28475150 |
| chr19 | 28599550 | 28599650 | 1223-Lng-D-T | 170  | chr19:28599550-28599650 |
| chr19 | 28730650 | 28730750 | 901-Lng-A-T  | 56   | chr19:28730650-28730750 |
| chr19 | 29002450 | 29002550 | 1072-Lng-A-T | 52   | chr19:29002450-29002550 |
| chr19 | 29041050 | 29041150 | 1065-Lng-C-T | 64   | chr19:29041050-29041150 |
| chr19 | 29070650 | 29070750 | 1274-Lng-A-T | 124  | chr19:29070650-29070750 |
| chr19 | 29111550 | 29111650 | 1152-Lng-A-T | 65   | chr19:29111550-29111650 |
| chr19 | 29228750 | 29228850 | 1100-Lng-A-T | 69   | chr19:29228750-29228850 |
| chr19 | 29332950 | 29333050 | 1100-Lng-A-T | 85   | chr19:29332950-29333050 |
| chr19 | 29384150 | 29384250 | 1090-Lng-A-T | 91   | chr19:29384150-29384250 |
| chr19 | 29514050 | 29514150 | 901-Lng-A-T  | 51   | chr19:29514050-29514150 |
| chr19 | 29604650 | 29604750 | 1188-Lng-A-T | 47   | chr19:29604650-29604750 |
| chr19 | 29614550 | 29614650 | 1223-Lng-B-T | 124  | chr19:29614550-29614650 |
| chr19 | 29633950 | 29634050 | 1223-Lng-A-T | 1887 | chr19:29633950-29634050 |
| chr19 | 29651250 | 29651350 | 901-Lng-D-T  | 65   | chr19:29651250-29651350 |
| chr19 | 29719350 | 29719450 | 1152-Lng-A-T | 35   | chr19:29719350-29719450 |
| chr19 | 29804550 | 29804650 | 1072-Lng-A-T | 57   | chr19:29804550-29804650 |
| chr19 | 29820550 | 29820650 | 1100-Lng-A-T | 259  | chr19:29820550-29820650 |
| chr19 | 29951450 | 29951550 | 1065-Lng-C-T | 2168 | chr19:29951450-29951550 |
| chr19 | 29951450 | 29951550 | 1065-Lng-A-T | 351  | chr19:29951450-29951550 |
| chr19 | 30010150 | 30010250 | 1274-Lng-A-T | 115  | chr19:30010150-30010250 |
| chr19 | 30017550 | 30017650 | 1004-Lng-A-T | 123  | chr19:30017550-30017650 |
| chr19 | 30037850 | 30037950 | 1223-Lng-D-T | 91   | chr19:30037850-30037950 |
| chr19 | 30048950 | 30049050 | 1072-Lng-A-T | 192  | chr19:30048950-30049050 |
| chr19 | 30123650 | 30123750 | 901-Lng-B-T  | 52   | chr19:30123650-30123750 |
| chr19 | 30127150 | 30127250 | 1223-Lng-B-T | 35   | chr19:30127150-30127250 |
| chr19 | 30133950 | 30134050 | 901-Lng-C-T  | 35   | chr19:30133950-30134050 |
| chr19 | 30181650 | 30181750 | 1152-Lng-A-T | 40   | chr19:30181650-30181750 |
| chr19 | 30307050 | 30307150 | 1090-Lng-A-T | 84   | chr19:30307050-30307150 |
| chr19 | 30345950 | 30346050 | 1223-Lng-C-T | 48   | chr19:30345950-30346050 |
| chr19 | 30461450 | 30461550 | 1223-Lng-B-T | 88   | chr19:30461450-30461550 |
| chr19 | 30676750 | 30676850 | 1223-Lng-A-T | 1391 | chr19:30676750-30676850 |
| chr19 | 30962850 | 30962950 | 1065-Lng-C-T | 71   | chr19:30962850-30962950 |
| chr19 | 30966650 | 30966750 | 1152-Lng-A-T | 108  | chr19:30966650-30966750 |
| chr19 | 31247350 | 31247450 | 1152-Lng-A-T | 100  | chr19:31247350-31247450 |
| chr19 | 31295550 | 31295650 | 1004-Lng-A-T | 60   | chr19:31295550-31295650 |
| chr19 | 31464550 | 31464650 | 1072-Lng-A-T | 92   | chr19:31464550-31464650 |
| chr19 | 31700550 | 31700650 | 1223-Lng-B-T | 111  | chr19:31700550-31700650 |
| chr19 | 32142250 | 32142350 | 1274-Lng-A-T | 284  | chr19:32142250-32142350 |
| chr19 | 32143750 | 32143850 | 1100-Lng-B-T | 322  | chr19:32143750-32143850 |
| chr19 | 32171650 | 32171750 | 901-Lng-A-T  | 57   | chr19:32171650-32171750 |

**Table S2: SB Insertion regions**

|       |          |          |              |     |                         |
|-------|----------|----------|--------------|-----|-------------------------|
| chr19 | 32195450 | 32195550 | 1065-Lng-B-T | 129 | chr19:32195450-32195550 |
| chr19 | 32221350 | 32221450 | 1223-Lng-D-T | 83  | chr19:32221350-32221450 |
| chr19 | 32347250 | 32347350 | 1065-Lng-B-T | 41  | chr19:32347250-32347350 |
| chr19 | 32427950 | 32428050 | 901-Lng-A-T  | 144 | chr19:32427950-32428050 |
| chr19 | 32481950 | 32482050 | 1274-Lng-A-T | 58  | chr19:32481950-32482050 |
| chr19 | 32501150 | 32501250 | 1223-Lng-C-T | 56  | chr19:32501150-32501250 |
| chr19 | 32607050 | 32607150 | 1223-Lng-A-T | 92  | chr19:32607050-32607150 |
| chr19 | 32754550 | 32754650 | 1100-Lng-B-T | 50  | chr19:32754550-32754650 |
| chr19 | 32763150 | 32763250 | 1090-Lng-A-T | 55  | chr19:32763150-32763250 |
| chr19 | 32784450 | 32784550 | 1004-Lng-A-T | 86  | chr19:32784450-32784550 |
| chr19 | 32837250 | 32837350 | 1223-Lng-B-T | 75  | chr19:32837250-32837350 |
| chr19 | 32839350 | 32839450 | 901-Lng-A-T  | 202 | chr19:32839350-32839450 |
| chr19 | 32864050 | 32864150 | 1065-Lng-B-T | 315 | chr19:32864050-32864150 |
| chr19 | 32902450 | 32902550 | 901-Lng-C-T  | 51  | chr19:32902450-32902550 |
| chr19 | 33078950 | 33079050 | 1072-Lng-A-T | 59  | chr19:33078950-33079050 |
| chr19 | 33103350 | 33103450 | 1152-Lng-A-T | 32  | chr19:33103350-33103450 |
| chr19 | 33108550 | 33108650 | 1151-Lng-A-T | 249 | chr19:33108550-33108650 |
| chr19 | 33148250 | 33148350 | 1223-Lng-A-T | 161 | chr19:33148250-33148350 |
| chr19 | 33160950 | 33161050 | 1188-Lng-A-T | 135 | chr19:33160950-33161050 |
| chr19 | 33322350 | 33322450 | 1152-Lng-A-T | 372 | chr19:33322350-33322450 |
| chr19 | 33439250 | 33439350 | 1223-Lng-D-T | 45  | chr19:33439250-33439350 |
| chr19 | 33443250 | 33443350 | 1072-Lng-A-T | 50  | chr19:33443250-33443350 |
| chr19 | 33641550 | 33641650 | 1152-Lng-A-T | 46  | chr19:33641550-33641650 |
| chr19 | 33855550 | 33855650 | 1065-Lng-C-T | 65  | chr19:33855550-33855650 |
| chr19 | 34133950 | 34134050 | 1065-Lng-C-T | 71  | chr19:34133950-34134050 |
| chr19 | 34269450 | 34269550 | 1100-Lng-A-T | 52  | chr19:34269450-34269550 |
| chr19 | 34274850 | 34274950 | 1274-Lng-A-T | 71  | chr19:34274850-34274950 |
| chr19 | 34295550 | 34295650 | 901-Lng-A-T  | 83  | chr19:34295550-34295650 |
| chr19 | 34313250 | 34313350 | 1090-Lng-A-T | 56  | chr19:34313250-34313350 |
| chr19 | 34353550 | 34353650 | 901-Lng-D-T  | 708 | chr19:34353550-34353650 |
| chr19 | 34380150 | 34380250 | 1223-Lng-D-T | 45  | chr19:34380150-34380250 |
| chr19 | 34424550 | 34424650 | 1004-Lng-A-T | 359 | chr19:34424550-34424650 |
| chr19 | 34661150 | 34661250 | 1152-Lng-A-T | 76  | chr19:34661150-34661250 |
| chr19 | 34826450 | 34826550 | 1090-Lng-A-T | 133 | chr19:34826450-34826550 |
| chr19 | 35003150 | 35003250 | 901-Lng-D-T  | 289 | chr19:35003150-35003250 |
| chr19 | 35366250 | 35366350 | 1090-Lng-A-T | 62  | chr19:35366250-35366350 |
| chr19 | 35424250 | 35424350 | 1223-Lng-D-T | 54  | chr19:35424250-35424350 |
| chr19 | 35617350 | 35617450 | 1152-Lng-A-T | 51  | chr19:35617350-35617450 |
| chr19 | 35693050 | 35693150 | 1004-Lng-A-T | 74  | chr19:35693050-35693150 |
| chr19 | 35696750 | 35696850 | 1090-Lng-A-T | 83  | chr19:35696750-35696850 |
| chr19 | 35805750 | 35805850 | 1065-Lng-C-T | 106 | chr19:35805750-35805850 |
| chr19 | 36026050 | 36026150 | 1065-Lng-A-T | 125 | chr19:36026050-36026150 |
| chr19 | 36559650 | 36559750 | 1004-Lng-A-T | 59  | chr19:36559650-36559750 |
| chr19 | 36950550 | 36950650 | 1065-Lng-B-T | 57  | chr19:36950550-36950650 |
| chr19 | 36973950 | 36974050 | 901-Lng-B-T  | 149 | chr19:36973950-36974050 |
| chr19 | 37043750 | 37043850 | 1223-Lng-A-T | 376 | chr19:37043750-37043850 |

**Table S2: SB Insertion regions**

|       |          |          |              |     |                         |
|-------|----------|----------|--------------|-----|-------------------------|
| chr19 | 37065750 | 37065850 | 1167-Lng-A-T | 107 | chr19:37065750-37065850 |
| chr19 | 37111750 | 37111850 | 1223-Lng-C-T | 62  | chr19:37111750-37111850 |
| chr19 | 37119350 | 37119450 | 1100-Lng-A-T | 160 | chr19:37119350-37119450 |
| chr19 | 37139950 | 37140050 | 1100-Lng-A-T | 109 | chr19:37139950-37140050 |
| chr19 | 37168050 | 37168150 | 1004-Lng-A-T | 421 | chr19:37168050-37168150 |
| chr19 | 37233650 | 37233750 | 1100-Lng-A-T | 51  | chr19:37233650-37233750 |
| chr19 | 37274850 | 37274950 | 1151-Lng-A-T | 103 | chr19:37274850-37274950 |
| chr19 | 37348050 | 37348150 | 1065-Lng-B-T | 566 | chr19:37348050-37348150 |
| chr19 | 37358450 | 37358550 | 1072-Lng-A-T | 148 | chr19:37358450-37358550 |
| chr19 | 37361750 | 37361850 | 1065-Lng-A-T | 57  | chr19:37361750-37361850 |
| chr19 | 37407950 | 37408050 | 1065-Lng-C-T | 193 | chr19:37407950-37408050 |
| chr19 | 37420350 | 37420450 | 1223-Lng-C-T | 51  | chr19:37420350-37420450 |
| chr19 | 37482450 | 37482550 | 1065-Lng-B-T | 102 | chr19:37482450-37482550 |
| chr19 | 37573750 | 37573850 | 1274-Lng-A-T | 90  | chr19:37573750-37573850 |
| chr19 | 37612350 | 37612450 | 901-Lng-C-T  | 68  | chr19:37612350-37612450 |
| chr19 | 37629650 | 37629750 | 1167-Lng-A-T | 93  | chr19:37629650-37629750 |
| chr19 | 37681350 | 37681450 | 1065-Lng-A-T | 38  | chr19:37681350-37681450 |
| chr19 | 37701950 | 37702050 | 1065-Lng-A-T | 54  | chr19:37701950-37702050 |
| chr19 | 37706850 | 37706950 | 1223-Lng-B-T | 109 | chr19:37706850-37706950 |
| chr19 | 37730050 | 37730150 | 1223-Lng-C-T | 51  | chr19:37730050-37730150 |
| chr19 | 37894750 | 37894850 | 901-Lng-B-T  | 46  | chr19:37894750-37894850 |
| chr19 | 37914950 | 37915050 | 901-Lng-B-T  | 92  | chr19:37914950-37915050 |
| chr19 | 38013650 | 38013750 | 1188-Lng-A-T | 35  | chr19:38013650-38013750 |
| chr19 | 38019150 | 38019250 | 1274-Lng-A-T | 83  | chr19:38019150-38019250 |
| chr19 | 38025650 | 38025750 | 1065-Lng-C-T | 62  | chr19:38025650-38025750 |
| chr19 | 38063250 | 38063350 | 901-Lng-D-T  | 484 | chr19:38063250-38063350 |
| chr19 | 38112750 | 38112850 | 1090-Lng-B-T | 78  | chr19:38112750-38112850 |
| chr19 | 38228250 | 38228350 | 901-Lng-C-T  | 32  | chr19:38228250-38228350 |
| chr19 | 38274650 | 38274750 | 1065-Lng-C-T | 175 | chr19:38274650-38274750 |
| chr19 | 38279350 | 38279450 | 1223-Lng-D-T | 44  | chr19:38279350-38279450 |
| chr19 | 38506450 | 38506550 | 1090-Lng-A-T | 59  | chr19:38506450-38506550 |
| chr19 | 38561450 | 38561550 | 1090-Lng-B-T | 733 | chr19:38561450-38561550 |
| chr19 | 38701550 | 38701650 | 846-Lng-A-T  | 58  | chr19:38701550-38701650 |
| chr19 | 38709150 | 38709250 | 846-Lng-A-T  | 84  | chr19:38709150-38709250 |
| chr19 | 38716450 | 38716550 | 1065-Lng-C-T | 94  | chr19:38716450-38716550 |
| chr19 | 38817450 | 38817550 | 1090-Lng-A-T | 87  | chr19:38817450-38817550 |
| chr19 | 38950750 | 38950850 | 901-Lng-C-T  | 163 | chr19:38950750-38950850 |
| chr19 | 38969550 | 38969650 | 1223-Lng-D-T | 41  | chr19:38969550-38969650 |
| chr19 | 38995250 | 38995350 | 1167-Lng-A-T | 52  | chr19:38995250-38995350 |
| chr19 | 39249450 | 39249550 | 1004-Lng-A-T | 61  | chr19:39249450-39249550 |
| chr19 | 39263850 | 39263950 | 1274-Lng-A-T | 68  | chr19:39263850-39263950 |
| chr19 | 39286650 | 39286750 | 1223-Lng-B-T | 53  | chr19:39286650-39286750 |
| chr19 | 39537150 | 39537250 | 846-Lng-A-T  | 106 | chr19:39537150-39537250 |
| chr19 | 39602050 | 39602150 | 901-Lng-A-T  | 567 | chr19:39602050-39602150 |
| chr19 | 39638150 | 39638250 | 901-Lng-D-T  | 229 | chr19:39638150-39638250 |
| chr19 | 39971450 | 39971550 | 1072-Lng-A-T | 53  | chr19:39971450-39971550 |

**Table S2: SB Insertion regions**

|       |          |          |              |      |                         |
|-------|----------|----------|--------------|------|-------------------------|
| chr19 | 39986650 | 39986750 | 1065-Lng-A-T | 86   | chr19:39986650-39986750 |
| chr19 | 40412950 | 40413050 | 901-Lng-D-T  | 380  | chr19:40412950-40413050 |
| chr19 | 40457150 | 40457250 | 1065-Lng-B-T | 45   | chr19:40457150-40457250 |
| chr19 | 40506750 | 40506850 | 901-Lng-B-T  | 53   | chr19:40506750-40506850 |
| chr19 | 40716650 | 40716750 | 1090-Lng-B-T | 881  | chr19:40716650-40716750 |
| chr19 | 40807050 | 40807150 | 901-Lng-A-T  | 347  | chr19:40807050-40807150 |
| chr19 | 40808850 | 40808950 | 901-Lng-B-T  | 93   | chr19:40808850-40808950 |
| chr19 | 40892250 | 40892350 | 846-Lng-A-T  | 147  | chr19:40892250-40892350 |
| chr19 | 40983450 | 40983550 | 1004-Lng-A-T | 68   | chr19:40983450-40983550 |
| chr19 | 40984750 | 40984850 | 1223-Lng-C-T | 72   | chr19:40984750-40984850 |
| chr19 | 41285650 | 41285750 | 1223-Lng-D-T | 89   | chr19:41285650-41285750 |
| chr19 | 41323250 | 41323350 | 1223-Lng-D-T | 54   | chr19:41323250-41323350 |
| chr19 | 41326450 | 41326550 | 1100-Lng-A-T | 137  | chr19:41326450-41326550 |
| chr19 | 41329950 | 41330050 | 1100-Lng-A-T | 51   | chr19:41329950-41330050 |
| chr19 | 41336550 | 41336650 | 1090-Lng-B-T | 1270 | chr19:41336550-41336650 |
| chr19 | 41460050 | 41460150 | 901-Lng-B-T  | 145  | chr19:41460050-41460150 |
| chr19 | 41476950 | 41477050 | 1090-Lng-A-T | 73   | chr19:41476950-41477050 |
| chr19 | 41512550 | 41512650 | 1223-Lng-C-T | 61   | chr19:41512550-41512650 |
| chr19 | 41577350 | 41577450 | 846-Lng-A-T  | 152  | chr19:41577350-41577450 |
| chr19 | 41581250 | 41581350 | 1223-Lng-A-T | 136  | chr19:41581250-41581350 |
| chr19 | 41607650 | 41607750 | 901-Lng-C-T  | 41   | chr19:41607650-41607750 |
| chr19 | 41628250 | 41628350 | 1223-Lng-D-T | 41   | chr19:41628250-41628350 |
| chr19 | 42013650 | 42013750 | 1152-Lng-A-T | 69   | chr19:42013650-42013750 |
| chr19 | 42046850 | 42046950 | 1188-Lng-A-T | 145  | chr19:42046850-42046950 |
| chr19 | 42052650 | 42052750 | 1167-Lng-A-T | 157  | chr19:42052650-42052750 |
| chr19 | 42124750 | 42124850 | 901-Lng-B-T  | 82   | chr19:42124750-42124850 |
| chr19 | 42174450 | 42174550 | 901-Lng-A-T  | 50   | chr19:42174450-42174550 |
| chr19 | 42607450 | 42607550 | 1090-Lng-A-T | 435  | chr19:42607450-42607550 |
| chr19 | 42610650 | 42610750 | 1188-Lng-A-T | 250  | chr19:42610650-42610750 |
| chr19 | 42644250 | 42644350 | 846-Lng-A-T  | 79   | chr19:42644250-42644350 |
| chr19 | 42848650 | 42848750 | 1223-Lng-A-T | 89   | chr19:42848650-42848750 |
| chr19 | 42931350 | 42931450 | 1223-Lng-B-T | 78   | chr19:42931350-42931450 |
| chr19 | 42976750 | 42976850 | 1004-Lng-A-T | 70   | chr19:42976750-42976850 |
| chr19 | 43058450 | 43058550 | 1004-Lng-A-T | 61   | chr19:43058450-43058550 |
| chr19 | 43374050 | 43374150 | 901-Lng-B-T  | 50   | chr19:43374050-43374150 |
| chr19 | 43502750 | 43502850 | 1065-Lng-C-T | 72   | chr19:43502750-43502850 |
| chr19 | 43927050 | 43927150 | 1274-Lng-A-T | 85   | chr19:43927050-43927150 |
| chr19 | 44000450 | 44000550 | 1065-Lng-B-T | 44   | chr19:44000450-44000550 |
| chr19 | 44013550 | 44013650 | 901-Lng-B-T  | 51   | chr19:44013550-44013650 |
| chr19 | 44076850 | 44076950 | 1100-Lng-A-T | 76   | chr19:44076850-44076950 |
| chr19 | 44136250 | 44136350 | 1274-Lng-A-T | 76   | chr19:44136250-44136350 |
| chr19 | 44203950 | 44204050 | 901-Lng-C-T  | 40   | chr19:44203950-44204050 |
| chr19 | 44383250 | 44383350 | 1188-Lng-A-T | 51   | chr19:44383250-44383350 |
| chr19 | 45007650 | 45007750 | 1223-Lng-A-T | 225  | chr19:45007650-45007750 |
| chr19 | 45011850 | 45011950 | 1065-Lng-B-T | 43   | chr19:45011850-45011950 |
| chr19 | 45044150 | 45044250 | 1151-Lng-A-T | 343  | chr19:45044150-45044250 |

**Table S2: SB Insertion regions**

|       |          |          |              |     |                         |
|-------|----------|----------|--------------|-----|-------------------------|
| chr19 | 45054150 | 45054250 | 1188-Lng-A-T | 252 | chr19:45054150-45054250 |
| chr19 | 45486450 | 45486550 | 1100-Lng-A-T | 83  | chr19:45486450-45486550 |
| chr19 | 45594650 | 45594750 | 901-Lng-A-T  | 59  | chr19:45594650-45594750 |
| chr19 | 45668250 | 45668350 | 1274-Lng-A-T | 59  | chr19:45668250-45668350 |
| chr19 | 45725450 | 45725550 | 1065-Lng-A-T | 47  | chr19:45725450-45725550 |
| chr19 | 45727950 | 45728050 | 1100-Lng-A-T | 68  | chr19:45727950-45728050 |
| chr19 | 45766350 | 45766450 | 901-Lng-A-T  | 53  | chr19:45766350-45766450 |
| chr19 | 45828950 | 45829050 | 1090-Lng-A-T | 64  | chr19:45828950-45829050 |
| chr19 | 45846950 | 45847050 | 1167-Lng-A-T | 111 | chr19:45846950-45847050 |
| chr19 | 45853350 | 45853450 | 1223-Lng-A-T | 62  | chr19:45853350-45853450 |
| chr19 | 46072350 | 46072450 | 1072-Lng-A-T | 196 | chr19:46072350-46072450 |
| chr19 | 46087450 | 46087550 | 1072-Lng-A-T | 119 | chr19:46087450-46087550 |
| chr19 | 46262250 | 46262350 | 1065-Lng-C-T | 83  | chr19:46262250-46262350 |
| chr19 | 46298450 | 46298550 | 901-Lng-D-T  | 58  | chr19:46298450-46298550 |
| chr19 | 46315650 | 46315750 | 901-Lng-D-T  | 60  | chr19:46315650-46315750 |
| chr19 | 46422650 | 46422750 | 1223-Lng-C-T | 55  | chr19:46422650-46422750 |
| chr19 | 46464150 | 46464250 | 1100-Lng-A-T | 119 | chr19:46464150-46464250 |
| chr19 | 46477350 | 46477450 | 1274-Lng-A-T | 79  | chr19:46477350-46477450 |
| chr19 | 46586250 | 46586350 | 1100-Lng-A-T | 65  | chr19:46586250-46586350 |
| chr19 | 46689650 | 46689750 | 901-Lng-B-T  | 162 | chr19:46689650-46689750 |
| chr19 | 46712950 | 46713050 | 1223-Lng-A-T | 112 | chr19:46712950-46713050 |
| chr19 | 46747750 | 46747850 | 1100-Lng-A-T | 156 | chr19:46747750-46747850 |
| chr19 | 46851750 | 46851850 | 1072-Lng-A-T | 145 | chr19:46851750-46851850 |
| chr19 | 46853150 | 46853250 | 1004-Lng-A-T | 50  | chr19:46853150-46853250 |
| chr19 | 46855650 | 46855750 | 901-Lng-D-T  | 146 | chr19:46855650-46855750 |
| chr19 | 46863350 | 46863450 | 1065-Lng-C-T | 71  | chr19:46863350-46863450 |
| chr19 | 46886350 | 46886450 | 1065-Lng-B-T | 55  | chr19:46886350-46886450 |
| chr19 | 46962250 | 46962350 | 1151-Lng-A-T | 69  | chr19:46962250-46962350 |
| chr19 | 47004950 | 47005050 | 1274-Lng-A-T | 145 | chr19:47004950-47005050 |
| chr19 | 47008150 | 47008250 | 1100-Lng-A-T | 120 | chr19:47008150-47008250 |
| chr19 | 47029150 | 47029250 | 1090-Lng-A-T | 267 | chr19:47029150-47029250 |
| chr19 | 47158050 | 47158150 | 1100-Lng-A-T | 145 | chr19:47158050-47158150 |
| chr19 | 47249050 | 47249150 | 1090-Lng-A-T | 124 | chr19:47249050-47249150 |
| chr19 | 47397250 | 47397350 | 1065-Lng-B-T | 44  | chr19:47397250-47397350 |
| chr19 | 47480950 | 47481050 | 1151-Lng-A-T | 294 | chr19:47480950-47481050 |
| chr19 | 47535550 | 47535650 | 1065-Lng-B-T | 46  | chr19:47535550-47535650 |
| chr19 | 47658450 | 47658550 | 1274-Lng-A-T | 93  | chr19:47658450-47658550 |
| chr19 | 47741950 | 47742050 | 1188-Lng-A-T | 40  | chr19:47741950-47742050 |
| chr19 | 47764250 | 47764350 | 1223-Lng-D-T | 42  | chr19:47764250-47764350 |
| chr19 | 48203850 | 48203950 | 1065-Lng-C-T | 370 | chr19:48203850-48203950 |
| chr19 | 48241550 | 48241650 | 846-Lng-A-T  | 44  | chr19:48241550-48241650 |
| chr19 | 48268250 | 48268350 | 1065-Lng-C-T | 76  | chr19:48268250-48268350 |
| chr19 | 48324950 | 48325050 | 1090-Lng-B-T | 876 | chr19:48324950-48325050 |
| chr19 | 48458650 | 48458750 | 1223-Lng-C-T | 99  | chr19:48458650-48458750 |
| chr19 | 48898150 | 48898250 | 1223-Lng-B-T | 67  | chr19:48898150-48898250 |
| chr19 | 48910750 | 48910850 | 1090-Lng-A-T | 66  | chr19:48910750-48910850 |

**Table S2: SB Insertion regions**

|       |          |          |              |      |                         |
|-------|----------|----------|--------------|------|-------------------------|
| chr19 | 49306150 | 49306250 | 1065-Lng-A-T | 49   | chr19:49306150-49306250 |
| chr19 | 49501850 | 49501950 | 1274-Lng-A-T | 50   | chr19:49501850-49501950 |
| chr19 | 49777050 | 49777150 | 1090-Lng-A-T | 45   | chr19:49777050-49777150 |
| chr19 | 49837450 | 49837550 | 1223-Lng-D-T | 46   | chr19:49837450-49837550 |
| chr19 | 49849050 | 49849150 | 1065-Lng-C-T | 67   | chr19:49849050-49849150 |
| chr19 | 49865650 | 49865750 | 901-Lng-C-T  | 72   | chr19:49865650-49865750 |
| chr19 | 49915250 | 49915350 | 1065-Lng-C-T | 86   | chr19:49915250-49915350 |
| chr19 | 50314250 | 50314350 | 1065-Lng-C-T | 98   | chr19:50314250-50314350 |
| chr19 | 50379050 | 50379150 | 1100-Lng-A-T | 92   | chr19:50379050-50379150 |
| chr19 | 50836350 | 50836450 | 1065-Lng-A-T | 49   | chr19:50836350-50836450 |
| chr19 | 50911950 | 50912050 | 1151-Lng-A-T | 55   | chr19:50911950-50912050 |
| chr19 | 51031050 | 51031150 | 1065-Lng-A-T | 45   | chr19:51031050-51031150 |
| chr19 | 51032750 | 51032850 | 1090-Lng-A-T | 529  | chr19:51032750-51032850 |
| chr19 | 51192350 | 51192450 | 1167-Lng-A-T | 78   | chr19:51192350-51192450 |
| chr19 | 51385850 | 51385950 | 901-Lng-B-T  | 244  | chr19:51385850-51385950 |
| chr19 | 51434250 | 51434350 | 1152-Lng-A-T | 44   | chr19:51434250-51434350 |
| chr19 | 51456250 | 51456350 | 1072-Lng-A-T | 87   | chr19:51456250-51456350 |
| chr19 | 51486050 | 51486150 | 1065-Lng-C-T | 202  | chr19:51486050-51486150 |
| chr19 | 51615450 | 51615550 | 1223-Lng-A-T | 174  | chr19:51615450-51615550 |
| chr19 | 51825250 | 51825350 | 901-Lng-D-T  | 207  | chr19:51825250-51825350 |
| chr19 | 52001150 | 52001250 | 1152-Lng-A-T | 118  | chr19:52001150-52001250 |
| chr19 | 52032250 | 52032350 | 1223-Lng-C-T | 58   | chr19:52032250-52032350 |
| chr19 | 52184650 | 52184750 | 1223-Lng-A-T | 54   | chr19:52184650-52184750 |
| chr19 | 52527950 | 52528050 | 1223-Lng-B-T | 413  | chr19:52527950-52528050 |
| chr19 | 52570350 | 52570450 | 901-Lng-C-T  | 83   | chr19:52570350-52570450 |
| chr19 | 52677150 | 52677250 | 901-Lng-D-T  | 106  | chr19:52677150-52677250 |
| chr19 | 53081250 | 53081350 | 1167-Lng-A-T | 140  | chr19:53081250-53081350 |
| chr19 | 53081450 | 53081550 | 901-Lng-A-T  | 61   | chr19:53081450-53081550 |
| chr19 | 53119950 | 53120050 | 901-Lng-A-T  | 66   | chr19:53119950-53120050 |
| chr19 | 53151250 | 53151350 | 1151-Lng-A-T | 65   | chr19:53151250-53151350 |
| chr19 | 53210250 | 53210350 | 846-Lng-A-T  | 110  | chr19:53210250-53210350 |
| chr19 | 53212950 | 53213050 | 1065-Lng-C-T | 1083 | chr19:53212950-53213050 |
| chr19 | 53220250 | 53220350 | 1223-Lng-C-T | 46   | chr19:53220250-53220350 |
| chr19 | 53229250 | 53229350 | 1065-Lng-B-T | 48   | chr19:53229250-53229350 |
| chr19 | 53276250 | 53276350 | 1090-Lng-A-T | 185  | chr19:53276250-53276350 |
| chr19 | 53284250 | 53284350 | 1090-Lng-A-T | 95   | chr19:53284250-53284350 |
| chr19 | 53344050 | 53344150 | 1151-Lng-A-T | 298  | chr19:53344050-53344150 |
| chr19 | 53606650 | 53606750 | 1188-Lng-A-T | 84   | chr19:53606650-53606750 |
| chr19 | 53962450 | 53962550 | 1090-Lng-A-T | 44   | chr19:53962450-53962550 |
| chr19 | 53980850 | 53980950 | 1065-Lng-B-T | 52   | chr19:53980850-53980950 |
| chr19 | 54062650 | 54062750 | 901-Lng-C-T  | 30   | chr19:54062650-54062750 |
| chr19 | 54062950 | 54063050 | 901-Lng-D-T  | 42   | chr19:54062950-54063050 |
| chr19 | 54082050 | 54082150 | 1065-Lng-C-T | 73   | chr19:54082050-54082150 |
| chr19 | 54095950 | 54096050 | 901-Lng-C-T  | 103  | chr19:54095950-54096050 |
| chr19 | 54621550 | 54621650 | 901-Lng-A-T  | 52   | chr19:54621550-54621650 |
| chr19 | 54663750 | 54663850 | 1065-Lng-A-T | 50   | chr19:54663750-54663850 |

**Table S2: SB Insertion regions**

|       |          |          |              |      |                         |
|-------|----------|----------|--------------|------|-------------------------|
| chr19 | 55185550 | 55185650 | 1188-Lng-A-T | 40   | chr19:55185550-55185650 |
| chr19 | 55307350 | 55307450 | 1223-Lng-D-T | 319  | chr19:55307350-55307450 |
| chr19 | 55340950 | 55341050 | 901-Lng-A-T  | 95   | chr19:55340950-55341050 |
| chr19 | 55379250 | 55379350 | 901-Lng-B-T  | 41   | chr19:55379250-55379350 |
| chr19 | 55423250 | 55423350 | 1223-Lng-B-T | 129  | chr19:55423250-55423350 |
| chr19 | 55432850 | 55432950 | 1072-Lng-A-T | 134  | chr19:55432850-55432950 |
| chr19 | 55467750 | 55467850 | 1065-Lng-C-T | 145  | chr19:55467750-55467850 |
| chr19 | 55483450 | 55483550 | 1090-Lng-A-T | 73   | chr19:55483450-55483550 |
| chr19 | 55557850 | 55557950 | 901-Lng-C-T  | 53   | chr19:55557850-55557950 |
| chr19 | 55570450 | 55570550 | 1167-Lng-A-T | 115  | chr19:55570450-55570550 |
| chr19 | 55585250 | 55585350 | 1065-Lng-C-T | 112  | chr19:55585250-55585350 |
| chr19 | 55642350 | 55642450 | 1223-Lng-A-T | 2214 | chr19:55642350-55642450 |
| chr19 | 55657250 | 55657350 | 1065-Lng-B-T | 43   | chr19:55657250-55657350 |
| chr19 | 55712550 | 55712650 | 1167-Lng-A-T | 49   | chr19:55712550-55712650 |
| chr19 | 55787650 | 55787750 | 1065-Lng-A-T | 69   | chr19:55787650-55787750 |
| chr19 | 55810550 | 55810650 | 1188-Lng-A-T | 1518 | chr19:55810550-55810650 |
| chr19 | 55844150 | 55844250 | 1188-Lng-A-T | 39   | chr19:55844150-55844250 |
| chr19 | 55910450 | 55910550 | 1223-Lng-C-T | 76   | chr19:55910450-55910550 |
| chr19 | 55917450 | 55917550 | 846-Lng-A-T  | 188  | chr19:55917450-55917550 |
| chr19 | 55930450 | 55930550 | 1152-Lng-A-T | 39   | chr19:55930450-55930550 |
| chr19 | 56378350 | 56378450 | 901-Lng-C-T  | 75   | chr19:56378350-56378450 |
| chr19 | 56494050 | 56494150 | 901-Lng-B-T  | 50   | chr19:56494050-56494150 |
| chr19 | 56495350 | 56495450 | 1065-Lng-A-T | 66   | chr19:56495350-56495450 |
| chr19 | 56633750 | 56633850 | 901-Lng-C-T  | 115  | chr19:56633750-56633850 |
| chr19 | 56694550 | 56694650 | 901-Lng-B-T  | 92   | chr19:56694550-56694650 |
| chr19 | 56696650 | 56696750 | 1188-Lng-A-T | 326  | chr19:56696650-56696750 |
| chr19 | 56869650 | 56869750 | 1100-Lng-B-T | 54   | chr19:56869650-56869750 |
| chr19 | 56869850 | 56869950 | 1090-Lng-A-T | 52   | chr19:56869850-56869950 |
| chr19 | 56883250 | 56883350 | 1188-Lng-A-T | 35   | chr19:56883250-56883350 |
| chr19 | 57047250 | 57047350 | 1065-Lng-A-T | 37   | chr19:57047250-57047350 |
| chr19 | 57130250 | 57130350 | 1223-Lng-B-T | 45   | chr19:57130250-57130350 |
| chr19 | 57165750 | 57165850 | 901-Lng-C-T  | 49   | chr19:57165750-57165850 |
| chr19 | 57329050 | 57329150 | 1065-Lng-A-T | 62   | chr19:57329050-57329150 |
| chr19 | 57386950 | 57387050 | 1223-Lng-C-T | 48   | chr19:57386950-57387050 |
| chr19 | 57465750 | 57465850 | 1274-Lng-A-T | 55   | chr19:57465750-57465850 |
| chr19 | 57515750 | 57515850 | 901-Lng-B-T  | 355  | chr19:57515750-57515850 |
| chr19 | 57764950 | 57765050 | 1072-Lng-A-T | 124  | chr19:57764950-57765050 |
| chr19 | 57766350 | 57766450 | 1072-Lng-A-T | 190  | chr19:57766350-57766450 |
| chr19 | 57891050 | 57891150 | 1223-Lng-B-T | 259  | chr19:57891050-57891150 |
| chr19 | 58014250 | 58014350 | 1065-Lng-A-T | 40   | chr19:58014250-58014350 |
| chr19 | 58017750 | 58017850 | 1100-Lng-A-T | 54   | chr19:58017750-58017850 |
| chr19 | 58116550 | 58116650 | 1065-Lng-C-T | 67   | chr19:58116550-58116650 |
| chr19 | 58133750 | 58133850 | 1065-Lng-A-T | 40   | chr19:58133750-58133850 |
| chr19 | 58202750 | 58202850 | 1223-Lng-A-T | 58   | chr19:58202750-58202850 |
| chr19 | 58308850 | 58308950 | 1223-Lng-B-T | 89   | chr19:58308850-58308950 |
| chr19 | 58606450 | 58606550 | 1072-Lng-A-T | 131  | chr19:58606450-58606550 |

**Table S2: SB Insertion regions**

|       |          |          |              |     |                         |
|-------|----------|----------|--------------|-----|-------------------------|
| chr19 | 58685250 | 58685350 | 1223-Lng-A-T | 52  | chr19:58685250-58685350 |
| chr19 | 58779650 | 58779750 | 1274-Lng-A-T | 249 | chr19:58779650-58779750 |
| chr19 | 58954550 | 58954650 | 1223-Lng-C-T | 49  | chr19:58954550-58954650 |
| chr19 | 59063750 | 59063850 | 1065-Lng-C-T | 85  | chr19:59063750-59063850 |
| chr19 | 59121950 | 59122050 | 1065-Lng-B-T | 64  | chr19:59121950-59122050 |
| chr19 | 59164950 | 59165050 | 1274-Lng-A-T | 154 | chr19:59164950-59165050 |
| chr19 | 59208250 | 59208350 | 1065-Lng-C-T | 61  | chr19:59208250-59208350 |
| chr19 | 59219950 | 59220050 | 1090-Lng-B-T | 690 | chr19:59219950-59220050 |
| chr19 | 59389350 | 59389450 | 1152-Lng-A-T | 53  | chr19:59389350-59389450 |
| chr19 | 59551150 | 59551250 | 1004-Lng-A-T | 68  | chr19:59551150-59551250 |
| chr19 | 59552150 | 59552250 | 901-Lng-A-T  | 51  | chr19:59552150-59552250 |
| chr19 | 59614550 | 59614650 | 1152-Lng-A-T | 108 | chr19:59614550-59614650 |
| chr19 | 59637650 | 59637750 | 1223-Lng-D-T | 40  | chr19:59637650-59637750 |
| chr19 | 59988950 | 59989050 | 1152-Lng-A-T | 132 | chr19:59988950-59989050 |
| chr19 | 60291950 | 60292050 | 1274-Lng-A-T | 114 | chr19:60291950-60292050 |
| chr19 | 60297850 | 60297950 | 1090-Lng-A-T | 98  | chr19:60297850-60297950 |
| chr19 | 60322950 | 60323050 | 1100-Lng-B-T | 84  | chr19:60322950-60323050 |
| chr19 | 60333850 | 60333950 | 1072-Lng-A-T | 57  | chr19:60333850-60333950 |
| chr19 | 60359450 | 60359550 | 1223-Lng-B-T | 74  | chr19:60359450-60359550 |
| chr19 | 60606250 | 60606350 | 1274-Lng-A-T | 74  | chr19:60606250-60606350 |
| chr19 | 60611950 | 60612050 | 1152-Lng-A-T | 100 | chr19:60611950-60612050 |
| chr19 | 60612750 | 60612850 | 846-Lng-A-T  | 136 | chr19:60612750-60612850 |
| chr19 | 60635650 | 60635750 | 901-Lng-A-T  | 84  | chr19:60635650-60635750 |
| chr19 | 60636550 | 60636650 | 846-Lng-A-T  | 654 | chr19:60636550-60636650 |
| chr19 | 60638050 | 60638150 | 1090-Lng-B-T | 262 | chr19:60638050-60638150 |
| chr19 | 60650250 | 60650350 | 1223-Lng-D-T | 58  | chr19:60650250-60650350 |
| chr19 | 60655250 | 60655350 | 1072-Lng-A-T | 170 | chr19:60655250-60655350 |
| chr19 | 60834050 | 60834150 | 1100-Lng-A-T | 62  | chr19:60834050-60834150 |
| chr19 | 60835750 | 60835850 | 1274-Lng-A-T | 148 | chr19:60835750-60835850 |
| chr19 | 60835950 | 60836050 | 1188-Lng-A-T | 189 | chr19:60835950-60836050 |
| chr19 | 60844950 | 60845050 | 1188-Lng-A-T | 120 | chr19:60844950-60845050 |
| chr19 | 60846050 | 60846150 | 901-Lng-D-T  | 409 | chr19:60846050-60846150 |
| chr19 | 60864850 | 60864950 | 1004-Lng-A-T | 966 | chr19:60864850-60864950 |
| chr19 | 60997450 | 60997550 | 1065-Lng-C-T | 139 | chr19:60997450-60997550 |
| chr19 | 61020450 | 61020550 | 1223-Lng-B-T | 377 | chr19:61020450-61020550 |
| chr19 | 61059950 | 61060050 | 1072-Lng-A-T | 137 | chr19:61059950-61060050 |
| chr19 | 61103450 | 61103550 | 1100-Lng-A-T | 87  | chr19:61103450-61103550 |
| chr2  | 3040150  | 3040250  | 1188-Lng-A-T | 59  | chr2:3040150-3040250    |
| chr2  | 3080150  | 3080250  | 901-Lng-B-T  | 77  | chr2:3080150-3080250    |
| chr2  | 3126650  | 3126750  | 901-Lng-A-T  | 57  | chr2:3126650-3126750    |
| chr2  | 3206650  | 3206750  | 1167-Lng-A-T | 61  | chr2:3206650-3206750    |
| chr2  | 3207250  | 3207350  | 1065-Lng-B-T | 56  | chr2:3207250-3207350    |
| chr2  | 3211150  | 3211250  | 901-Lng-B-T  | 435 | chr2:3211150-3211250    |
| chr2  | 3373450  | 3373550  | 1100-Lng-A-T | 57  | chr2:3373450-3373550    |
| chr2  | 3644650  | 3644750  | 901-Lng-C-T  | 60  | chr2:3644650-3644750    |
| chr2  | 3808850  | 3808950  | 846-Lng-A-T  | 185 | chr2:3808850-3808950    |



**Table S2: SB Insertion regions**

|      |         |         |              |      |                      |
|------|---------|---------|--------------|------|----------------------|
| chr2 | 4223050 | 4223150 | 1065-Lng-C-T | 71   | chr2:4223050-4223150 |
| chr2 | 4446950 | 4447050 | 1152-Lng-A-T | 93   | chr2:4446950-4447050 |
| chr2 | 4497550 | 4497650 | 1072-Lng-A-T | 63   | chr2:4497550-4497650 |
| chr2 | 4521550 | 4521650 | 901-Lng-B-T  | 169  | chr2:4521550-4521650 |
| chr2 | 4523550 | 4523650 | 1223-Lng-B-T | 87   | chr2:4523550-4523650 |
| chr2 | 4600650 | 4600750 | 901-Lng-D-T  | 46   | chr2:4600650-4600750 |
| chr2 | 4668950 | 4669050 | 1004-Lng-A-T | 57   | chr2:4668950-4669050 |
| chr2 | 4670450 | 4670550 | 901-Lng-A-T  | 82   | chr2:4670450-4670550 |
| chr2 | 4673050 | 4673150 | 1274-Lng-A-T | 85   | chr2:4673050-4673150 |
| chr2 | 5240350 | 5240450 | 1065-Lng-C-T | 65   | chr2:5240350-5240450 |
| chr2 | 5271150 | 5271250 | 1167-Lng-A-T | 82   | chr2:5271150-5271250 |
| chr2 | 5317350 | 5317450 | 1090-Lng-A-T | 44   | chr2:5317350-5317450 |
| chr2 | 5346650 | 5346750 | 901-Lng-C-T  | 62   | chr2:5346650-5346750 |
| chr2 | 5389150 | 5389250 | 1065-Lng-A-T | 110  | chr2:5389150-5389250 |
| chr2 | 5722050 | 5722150 | 1090-Lng-A-T | 79   | chr2:5722050-5722150 |
| chr2 | 5759950 | 5760050 | 1065-Lng-B-T | 578  | chr2:5759950-5760050 |
| chr2 | 5899950 | 5900050 | 901-Lng-B-T  | 57   | chr2:5899950-5900050 |
| chr2 | 5952650 | 5952750 | 1188-Lng-A-T | 417  | chr2:5952650-5952750 |
| chr2 | 5957650 | 5957750 | 1090-Lng-B-T | 469  | chr2:5957650-5957750 |
| chr2 | 5965450 | 5965550 | 1065-Lng-B-T | 61   | chr2:5965450-5965550 |
| chr2 | 6059450 | 6059550 | 1100-Lng-B-T | 57   | chr2:6059450-6059550 |
| chr2 | 6070950 | 6071050 | 901-Lng-D-T  | 127  | chr2:6070950-6071050 |
| chr2 | 6122650 | 6122750 | 1065-Lng-A-T | 114  | chr2:6122650-6122750 |
| chr2 | 6239150 | 6239250 | 1188-Lng-A-T | 345  | chr2:6239150-6239250 |
| chr2 | 6279650 | 6279750 | 901-Lng-D-T  | 89   | chr2:6279650-6279750 |
| chr2 | 6285650 | 6285750 | 1274-Lng-A-T | 129  | chr2:6285650-6285750 |
| chr2 | 6285850 | 6285950 | 1188-Lng-A-T | 44   | chr2:6285850-6285950 |
| chr2 | 6288450 | 6288550 | 1100-Lng-A-T | 52   | chr2:6288450-6288550 |
| chr2 | 6335750 | 6335850 | 1188-Lng-A-T | 1655 | chr2:6335750-6335850 |
| chr2 | 6533350 | 6533450 | 1188-Lng-A-T | 47   | chr2:6533350-6533450 |
| chr2 | 6550650 | 6550750 | 1065-Lng-C-T | 86   | chr2:6550650-6550750 |
| chr2 | 6570750 | 6570850 | 1072-Lng-A-T | 130  | chr2:6570750-6570850 |
| chr2 | 6574750 | 6574850 | 1188-Lng-A-T | 44   | chr2:6574750-6574850 |
| chr2 | 6619750 | 6619850 | 1151-Lng-A-T | 55   | chr2:6619750-6619850 |
| chr2 | 6647150 | 6647250 | 846-Lng-A-T  | 82   | chr2:6647150-6647250 |
| chr2 | 6672050 | 6672150 | 846-Lng-A-T  | 49   | chr2:6672050-6672150 |
| chr2 | 6672250 | 6672350 | 901-Lng-C-T  | 46   | chr2:6672250-6672350 |
| chr2 | 6684250 | 6684350 | 901-Lng-A-T  | 89   | chr2:6684250-6684350 |
| chr2 | 6692150 | 6692250 | 846-Lng-A-T  | 122  | chr2:6692150-6692250 |
| chr2 | 6700950 | 6701050 | 901-Lng-D-T  | 231  | chr2:6700950-6701050 |
| chr2 | 6712350 | 6712450 | 1274-Lng-A-T | 52   | chr2:6712350-6712450 |
| chr2 | 6718850 | 6718950 | 1152-Lng-A-T | 43   | chr2:6718850-6718950 |
| chr2 | 6780850 | 6780950 | 1223-Lng-D-T | 56   | chr2:6780850-6780950 |
| chr2 | 6818450 | 6818550 | 901-Lng-A-T  | 79   | chr2:6818450-6818550 |
| chr2 | 6901650 | 6901750 | 1065-Lng-C-T | 72   | chr2:6901650-6901750 |
| chr2 | 7155350 | 7155450 | 1090-Lng-A-T | 66   | chr2:7155350-7155450 |

**Table S2: SB Insertion regions**

|      |          |          |              |      |                        |
|------|----------|----------|--------------|------|------------------------|
| chr2 | 7206850  | 7206950  | 1100-Lng-B-T | 59   | chr2:7206850-7206950   |
| chr2 | 7568750  | 7568850  | 1065-Lng-B-T | 53   | chr2:7568750-7568850   |
| chr2 | 7631350  | 7631450  | 1065-Lng-C-T | 958  | chr2:7631350-7631450   |
| chr2 | 7641850  | 7641950  | 901-Lng-B-T  | 54   | chr2:7641850-7641950   |
| chr2 | 7817550  | 7817650  | 1065-Lng-B-T | 54   | chr2:7817550-7817650   |
| chr2 | 7868150  | 7868250  | 1090-Lng-B-T | 1537 | chr2:7868150-7868250   |
| chr2 | 7879450  | 7879550  | 1090-Lng-B-T | 162  | chr2:7879450-7879550   |
| chr2 | 7954750  | 7954850  | 1072-Lng-A-T | 103  | chr2:7954750-7954850   |
| chr2 | 8016450  | 8016550  | 901-Lng-C-T  | 41   | chr2:8016450-8016550   |
| chr2 | 8207050  | 8207150  | 901-Lng-C-T  | 55   | chr2:8207050-8207150   |
| chr2 | 8236250  | 8236350  | 1223-Lng-A-T | 79   | chr2:8236250-8236350   |
| chr2 | 8262950  | 8263050  | 1090-Lng-A-T | 83   | chr2:8262950-8263050   |
| chr2 | 8282950  | 8283050  | 1065-Lng-C-T | 127  | chr2:8282950-8283050   |
| chr2 | 8345450  | 8345550  | 901-Lng-B-T  | 53   | chr2:8345450-8345550   |
| chr2 | 8577450  | 8577550  | 901-Lng-B-T  | 92   | chr2:8577450-8577550   |
| chr2 | 8857850  | 8857950  | 1072-Lng-A-T | 56   | chr2:8857850-8857950   |
| chr2 | 8889850  | 8889950  | 1065-Lng-B-T | 47   | chr2:8889850-8889950   |
| chr2 | 9035850  | 9035950  | 901-Lng-D-T  | 145  | chr2:9035850-9035950   |
| chr2 | 9081750  | 9081850  | 1065-Lng-A-T | 83   | chr2:9081750-9081850   |
| chr2 | 9233150  | 9233250  | 1090-Lng-A-T | 67   | chr2:9233150-9233250   |
| chr2 | 9686150  | 9686250  | 1072-Lng-A-T | 120  | chr2:9686150-9686250   |
| chr2 | 9848650  | 9848750  | 1004-Lng-A-T | 61   | chr2:9848650-9848750   |
| chr2 | 9917050  | 9917150  | 846-Lng-A-T  | 143  | chr2:9917050-9917150   |
| chr2 | 9977350  | 9977450  | 1274-Lng-A-T | 283  | chr2:9977350-9977450   |
| chr2 | 9990950  | 9991050  | 1072-Lng-A-T | 58   | chr2:9990950-9991050   |
| chr2 | 10031550 | 10031650 | 1223-Lng-D-T | 56   | chr2:10031550-10031650 |
| chr2 | 10434750 | 10434850 | 901-Lng-A-T  | 96   | chr2:10434750-10434850 |
| chr2 | 10467050 | 10467150 | 1274-Lng-A-T | 75   | chr2:10467050-10467150 |
| chr2 | 10501650 | 10501750 | 901-Lng-A-T  | 66   | chr2:10501650-10501750 |
| chr2 | 10728350 | 10728450 | 1065-Lng-C-T | 71   | chr2:10728350-10728450 |
| chr2 | 10751750 | 10751850 | 1152-Lng-A-T | 34   | chr2:10751750-10751850 |
| chr2 | 10893150 | 10893250 | 1065-Lng-C-T | 77   | chr2:10893150-10893250 |
| chr2 | 10971950 | 10972050 | 1065-Lng-A-T | 62   | chr2:10971950-10972050 |
| chr2 | 11472050 | 11472150 | 1065-Lng-C-T | 105  | chr2:11472050-11472150 |
| chr2 | 11512550 | 11512650 | 1090-Lng-B-T | 108  | chr2:11512550-11512650 |
| chr2 | 11520550 | 11520650 | 1274-Lng-A-T | 88   | chr2:11520550-11520650 |
| chr2 | 11583050 | 11583150 | 1152-Lng-A-T | 75   | chr2:11583050-11583150 |
| chr2 | 11614350 | 11614450 | 1274-Lng-A-T | 75   | chr2:11614350-11614450 |
| chr2 | 11649650 | 11649750 | 1090-Lng-A-T | 56   | chr2:11649650-11649750 |
| chr2 | 11867950 | 11868050 | 1274-Lng-A-T | 56   | chr2:11867950-11868050 |
| chr2 | 12136850 | 12136950 | 1152-Lng-A-T | 74   | chr2:12136850-12136950 |
| chr2 | 12138850 | 12138950 | 1065-Lng-B-T | 64   | chr2:12138850-12138950 |
| chr2 | 12308350 | 12308450 | 1223-Lng-C-T | 48   | chr2:12308350-12308450 |
| chr2 | 12467950 | 12468050 | 1274-Lng-A-T | 80   | chr2:12467950-12468050 |
| chr2 | 12717350 | 12717450 | 1152-Lng-A-T | 69   | chr2:12717350-12717450 |
| chr2 | 12846250 | 12846350 | 1065-Lng-C-T | 83   | chr2:12846250-12846350 |

**Table S2: SB Insertion regions**

|      |          |          |              |     |                        |
|------|----------|----------|--------------|-----|------------------------|
| chr2 | 12907850 | 12907950 | 901-Lng-C-T  | 161 | chr2:12907850-12907950 |
| chr2 | 13009250 | 13009350 | 901-Lng-D-T  | 162 | chr2:13009250-13009350 |
| chr2 | 13154450 | 13154550 | 1188-Lng-A-T | 35  | chr2:13154450-13154550 |
| chr2 | 13170250 | 13170350 | 1065-Lng-C-T | 76  | chr2:13170250-13170350 |
| chr2 | 13212550 | 13212650 | 1065-Lng-A-T | 81  | chr2:13212550-13212650 |
| chr2 | 13278250 | 13278350 | 846-Lng-A-T  | 159 | chr2:13278250-13278350 |
| chr2 | 13432950 | 13433050 | 1004-Lng-A-T | 76  | chr2:13432950-13433050 |
| chr2 | 13474650 | 13474750 | 1072-Lng-A-T | 171 | chr2:13474650-13474750 |
| chr2 | 13623150 | 13623250 | 1223-Lng-D-T | 41  | chr2:13623150-13623250 |
| chr2 | 13828950 | 13829050 | 1004-Lng-A-T | 254 | chr2:13828950-13829050 |
| chr2 | 13966750 | 13966850 | 1065-Lng-C-T | 82  | chr2:13966750-13966850 |
| chr2 | 14016450 | 14016550 | 901-Lng-B-T  | 182 | chr2:14016450-14016550 |
| chr2 | 14049150 | 14049250 | 901-Lng-A-T  | 81  | chr2:14049150-14049250 |
| chr2 | 14054250 | 14054350 | 901-Lng-A-T  | 442 | chr2:14054250-14054350 |
| chr2 | 14056150 | 14056250 | 1152-Lng-A-T | 102 | chr2:14056150-14056250 |
| chr2 | 14059050 | 14059150 | 1152-Lng-A-T | 132 | chr2:14059050-14059150 |
| chr2 | 14069650 | 14069750 | 1223-Lng-A-T | 158 | chr2:14069650-14069750 |
| chr2 | 14073450 | 14073550 | 1065-Lng-B-T | 81  | chr2:14073450-14073550 |
| chr2 | 14620150 | 14620250 | 1065-Lng-B-T | 341 | chr2:14620150-14620250 |
| chr2 | 14707550 | 14707650 | 1223-Lng-D-T | 49  | chr2:14707550-14707650 |
| chr2 | 14728750 | 14728850 | 1065-Lng-B-T | 49  | chr2:14728750-14728850 |
| chr2 | 14814650 | 14814750 | 1223-Lng-A-T | 532 | chr2:14814650-14814750 |
| chr2 | 14934550 | 14934650 | 1065-Lng-C-T | 67  | chr2:14934550-14934650 |
| chr2 | 14964750 | 14964850 | 1167-Lng-A-T | 74  | chr2:14964750-14964850 |
| chr2 | 14966150 | 14966250 | 1004-Lng-A-T | 87  | chr2:14966150-14966250 |
| chr2 | 14986650 | 14986750 | 901-Lng-C-T  | 52  | chr2:14986650-14986750 |
| chr2 | 15101950 | 15102050 | 1065-Lng-A-T | 56  | chr2:15101950-15102050 |
| chr2 | 15137650 | 15137750 | 1151-Lng-A-T | 524 | chr2:15137650-15137750 |
| chr2 | 15260350 | 15260450 | 901-Lng-A-T  | 225 | chr2:15260350-15260450 |
| chr2 | 15402050 | 15402150 | 1065-Lng-B-T | 82  | chr2:15402050-15402150 |
| chr2 | 15604750 | 15604850 | 1072-Lng-A-T | 53  | chr2:15604750-15604850 |
| chr2 | 15685150 | 15685250 | 1004-Lng-A-T | 49  | chr2:15685150-15685250 |
| chr2 | 15709550 | 15709650 | 846-Lng-A-T  | 73  | chr2:15709550-15709650 |
| chr2 | 15796250 | 15796350 | 1065-Lng-A-T | 72  | chr2:15796250-15796350 |
| chr2 | 15848950 | 15849050 | 1065-Lng-B-T | 77  | chr2:15848950-15849050 |
| chr2 | 15975950 | 15976050 | 1274-Lng-A-T | 64  | chr2:15975950-15976050 |
| chr2 | 16022550 | 16022650 | 1223-Lng-A-T | 162 | chr2:16022550-16022650 |
| chr2 | 16074750 | 16074850 | 1072-Lng-A-T | 131 | chr2:16074750-16074850 |
| chr2 | 16168950 | 16169050 | 901-Lng-C-T  | 149 | chr2:16168950-16169050 |
| chr2 | 16223550 | 16223650 | 901-Lng-A-T  | 58  | chr2:16223550-16223650 |
| chr2 | 16396950 | 16397050 | 1065-Lng-C-T | 97  | chr2:16396950-16397050 |
| chr2 | 16495050 | 16495150 | 1065-Lng-C-T | 109 | chr2:16495050-16495150 |
| chr2 | 16736450 | 16736550 | 1223-Lng-D-T | 45  | chr2:16736450-16736550 |
| chr2 | 16741550 | 16741650 | 1274-Lng-A-T | 180 | chr2:16741550-16741650 |
| chr2 | 16775250 | 16775350 | 846-Lng-A-T  | 72  | chr2:16775250-16775350 |
| chr2 | 17283250 | 17283350 | 901-Lng-C-T  | 97  | chr2:17283250-17283350 |

**Table S2: SB Insertion regions**

|      |          |          |              |      |                        |
|------|----------|----------|--------------|------|------------------------|
| chr2 | 17307450 | 17307550 | 1065-Lng-B-T | 63   | chr2:17307450-17307550 |
| chr2 | 17356750 | 17356850 | 1072-Lng-A-T | 48   | chr2:17356750-17356850 |
| chr2 | 17381350 | 17381450 | 1223-Lng-D-T | 46   | chr2:17381350-17381450 |
| chr2 | 17459650 | 17459750 | 1151-Lng-A-T | 115  | chr2:17459650-17459750 |
| chr2 | 17468550 | 17468650 | 1065-Lng-A-T | 73   | chr2:17468550-17468650 |
| chr2 | 17557450 | 17557550 | 1223-Lng-A-T | 145  | chr2:17557450-17557550 |
| chr2 | 17603250 | 17603350 | 1167-Lng-A-T | 62   | chr2:17603250-17603350 |
| chr2 | 17645350 | 17645450 | 1152-Lng-A-T | 34   | chr2:17645350-17645450 |
| chr2 | 17981850 | 17981950 | 1090-Lng-A-T | 97   | chr2:17981850-17981950 |
| chr2 | 18008150 | 18008250 | 1223-Lng-A-T | 80   | chr2:18008150-18008250 |
| chr2 | 18009750 | 18009850 | 901-Lng-D-T  | 37   | chr2:18009750-18009850 |
| chr2 | 18012550 | 18012650 | 1188-Lng-A-T | 173  | chr2:18012550-18012650 |
| chr2 | 18035950 | 18036050 | 1065-Lng-C-T | 86   | chr2:18035950-18036050 |
| chr2 | 18046350 | 18046450 | 1274-Lng-A-T | 72   | chr2:18046350-18046450 |
| chr2 | 18076950 | 18077050 | 1004-Lng-A-T | 79   | chr2:18076950-18077050 |
| chr2 | 18091650 | 18091750 | 1004-Lng-A-T | 140  | chr2:18091650-18091750 |
| chr2 | 18099350 | 18099450 | 1152-Lng-A-T | 156  | chr2:18099350-18099450 |
| chr2 | 18103150 | 18103250 | 1151-Lng-A-T | 71   | chr2:18103150-18103250 |
| chr2 | 18103250 | 18103350 | 1223-Lng-D-T | 59   | chr2:18103250-18103350 |
| chr2 | 18163950 | 18164050 | 1223-Lng-B-T | 388  | chr2:18163950-18164050 |
| chr2 | 18288250 | 18288350 | 1065-Lng-A-T | 38   | chr2:18288250-18288350 |
| chr2 | 18289450 | 18289550 | 1090-Lng-A-T | 87   | chr2:18289450-18289550 |
| chr2 | 18300050 | 18300150 | 1065-Lng-C-T | 63   | chr2:18300050-18300150 |
| chr2 | 18301550 | 18301650 | 901-Lng-A-T  | 79   | chr2:18301550-18301650 |
| chr2 | 18478650 | 18478750 | 1188-Lng-A-T | 134  | chr2:18478650-18478750 |
| chr2 | 18627950 | 18628050 | 901-Lng-C-T  | 57   | chr2:18627950-18628050 |
| chr2 | 18683850 | 18683950 | 1223-Lng-C-T | 974  | chr2:18683850-18683950 |
| chr2 | 18684550 | 18684650 | 1223-Lng-B-T | 456  | chr2:18684550-18684650 |
| chr2 | 18813250 | 18813350 | 901-Lng-C-T  | 128  | chr2:18813250-18813350 |
| chr2 | 18816750 | 18816850 | 1274-Lng-A-T | 121  | chr2:18816750-18816850 |
| chr2 | 18902250 | 18902350 | 1072-Lng-A-T | 70   | chr2:18902250-18902350 |
| chr2 | 19001550 | 19001650 | 901-Lng-C-T  | 31   | chr2:19001550-19001650 |
| chr2 | 19075150 | 19075250 | 901-Lng-C-T  | 1175 | chr2:19075150-19075250 |
| chr2 | 19107650 | 19107750 | 1223-Lng-C-T | 46   | chr2:19107650-19107750 |
| chr2 | 19199850 | 19199950 | 1090-Lng-A-T | 61   | chr2:19199850-19199950 |
| chr2 | 19313550 | 19313650 | 1004-Lng-A-T | 72   | chr2:19313550-19313650 |
| chr2 | 19515050 | 19515150 | 1090-Lng-A-T | 73   | chr2:19515050-19515150 |
| chr2 | 19540350 | 19540450 | 901-Lng-C-T  | 44   | chr2:19540350-19540450 |
| chr2 | 20210050 | 20210150 | 1004-Lng-A-T | 94   | chr2:20210050-20210150 |
| chr2 | 20252350 | 20252450 | 1223-Lng-B-T | 195  | chr2:20252350-20252450 |
| chr2 | 20621250 | 20621350 | 1065-Lng-A-T | 44   | chr2:20621250-20621350 |
| chr2 | 20631750 | 20631850 | 846-Lng-A-T  | 56   | chr2:20631750-20631850 |
| chr2 | 20634750 | 20634850 | 1065-Lng-C-T | 77   | chr2:20634750-20634850 |
| chr2 | 20655250 | 20655350 | 1072-Lng-A-T | 60   | chr2:20655250-20655350 |
| chr2 | 20662950 | 20663050 | 1274-Lng-A-T | 88   | chr2:20662950-20663050 |
| chr2 | 20790050 | 20790150 | 1152-Lng-A-T | 69   | chr2:20790050-20790150 |

**Table S2: SB Insertion regions**

|      |          |          |              |     |                        |
|------|----------|----------|--------------|-----|------------------------|
| chr2 | 20845450 | 20845550 | 1188-Lng-A-T | 37  | chr2:20845450-20845550 |
| chr2 | 20908450 | 20908550 | 1065-Lng-A-T | 59  | chr2:20908450-20908550 |
| chr2 | 21120750 | 21120850 | 1100-Lng-B-T | 618 | chr2:21120750-21120850 |
| chr2 | 21160850 | 21160950 | 1090-Lng-A-T | 102 | chr2:21160850-21160950 |
| chr2 | 21300850 | 21300950 | 1065-Lng-A-T | 57  | chr2:21300850-21300950 |
| chr2 | 21329450 | 21329550 | 1065-Lng-A-T | 34  | chr2:21329450-21329550 |
| chr2 | 21407150 | 21407250 | 901-Lng-C-T  | 46  | chr2:21407150-21407250 |
| chr2 | 21499850 | 21499950 | 901-Lng-B-T  | 315 | chr2:21499850-21499950 |
| chr2 | 21511750 | 21511850 | 901-Lng-B-T  | 133 | chr2:21511750-21511850 |
| chr2 | 21648950 | 21649050 | 901-Lng-C-T  | 317 | chr2:21648950-21649050 |
| chr2 | 22099550 | 22099650 | 901-Lng-A-T  | 53  | chr2:22099550-22099650 |
| chr2 | 22548650 | 22548750 | 901-Lng-B-T  | 232 | chr2:22548650-22548750 |
| chr2 | 22817450 | 22817550 | 1151-Lng-A-T | 73  | chr2:22817450-22817550 |
| chr2 | 22818750 | 22818850 | 901-Lng-D-T  | 158 | chr2:22818750-22818850 |
| chr2 | 22834450 | 22834550 | 1151-Lng-A-T | 65  | chr2:22834450-22834550 |
| chr2 | 22850150 | 22850250 | 1152-Lng-A-T | 36  | chr2:22850150-22850250 |
| chr2 | 22872850 | 22872950 | 1167-Lng-A-T | 74  | chr2:22872850-22872950 |
| chr2 | 22923050 | 22923150 | 1100-Lng-B-T | 564 | chr2:22923050-22923150 |
| chr2 | 22941150 | 22941250 | 1100-Lng-A-T | 124 | chr2:22941150-22941250 |
| chr2 | 22963750 | 22963850 | 1152-Lng-A-T | 44  | chr2:22963750-22963850 |
| chr2 | 23267550 | 23267650 | 901-Lng-A-T  | 102 | chr2:23267550-23267650 |
| chr2 | 23354150 | 23354250 | 1090-Lng-A-T | 70  | chr2:23354150-23354250 |
| chr2 | 23356050 | 23356150 | 1152-Lng-A-T | 61  | chr2:23356050-23356150 |
| chr2 | 23369450 | 23369550 | 901-Lng-D-T  | 434 | chr2:23369450-23369550 |
| chr2 | 23373550 | 23373650 | 1072-Lng-A-T | 60  | chr2:23373550-23373650 |
| chr2 | 23415650 | 23415750 | 1100-Lng-A-T | 61  | chr2:23415650-23415750 |
| chr2 | 23648050 | 23648150 | 901-Lng-A-T  | 105 | chr2:23648050-23648150 |
| chr2 | 23670450 | 23670550 | 846-Lng-A-T  | 172 | chr2:23670450-23670550 |
| chr2 | 23867550 | 23867650 | 1223-Lng-D-T | 42  | chr2:23867550-23867650 |
| chr2 | 23880150 | 23880250 | 1100-Lng-A-T | 496 | chr2:23880150-23880250 |
| chr2 | 24030950 | 24031050 | 846-Lng-A-T  | 144 | chr2:24030950-24031050 |
| chr2 | 24135650 | 24135750 | 1065-Lng-C-T | 114 | chr2:24135650-24135750 |
| chr2 | 24142650 | 24142750 | 1223-Lng-D-T | 42  | chr2:24142650-24142750 |
| chr2 | 24266750 | 24266850 | 1152-Lng-A-T | 101 | chr2:24266750-24266850 |
| chr2 | 24644250 | 24644350 | 901-Lng-B-T  | 37  | chr2:24644250-24644350 |
| chr2 | 24747950 | 24748050 | 1152-Lng-A-T | 73  | chr2:24747950-24748050 |
| chr2 | 24752050 | 24752150 | 1065-Lng-C-T | 69  | chr2:24752050-24752150 |
| chr2 | 24785950 | 24786050 | 901-Lng-A-T  | 83  | chr2:24785950-24786050 |
| chr2 | 24785950 | 24786050 | 1152-Lng-A-T | 40  | chr2:24785950-24786050 |
| chr2 | 25043950 | 25044050 | 901-Lng-A-T  | 122 | chr2:25043950-25044050 |
| chr2 | 25214750 | 25214850 | 1274-Lng-A-T | 75  | chr2:25214750-25214850 |
| chr2 | 25380350 | 25380450 | 1151-Lng-A-T | 261 | chr2:25380350-25380450 |
| chr2 | 25640850 | 25640950 | 1151-Lng-A-T | 76  | chr2:25640850-25640950 |
| chr2 | 25780350 | 25780450 | 1004-Lng-A-T | 50  | chr2:25780350-25780450 |
| chr2 | 25955450 | 25955550 | 1004-Lng-A-T | 202 | chr2:25955450-25955550 |
| chr2 | 25961250 | 25961350 | 1274-Lng-A-T | 104 | chr2:25961250-25961350 |

**Table S2: SB Insertion regions**

|      |          |          |              |      |                        |
|------|----------|----------|--------------|------|------------------------|
| chr2 | 26178350 | 26178450 | 1065-Lng-C-T | 1183 | chr2:26178350-26178450 |
| chr2 | 26287050 | 26287150 | 901-Lng-C-T  | 29   | chr2:26287050-26287150 |
| chr2 | 26302950 | 26303050 | 1167-Lng-A-T | 96   | chr2:26302950-26303050 |
| chr2 | 26507450 | 26507550 | 1004-Lng-A-T | 51   | chr2:26507450-26507550 |
| chr2 | 26745650 | 26745750 | 1188-Lng-A-T | 191  | chr2:26745650-26745750 |
| chr2 | 27111450 | 27111550 | 901-Lng-A-T  | 74   | chr2:27111450-27111550 |
| chr2 | 27149750 | 27149850 | 1188-Lng-A-T | 52   | chr2:27149750-27149850 |
| chr2 | 27270150 | 27270250 | 1151-Lng-A-T | 289  | chr2:27270150-27270250 |
| chr2 | 27554850 | 27554950 | 1100-Lng-B-T | 2490 | chr2:27554850-27554950 |
| chr2 | 27582250 | 27582350 | 901-Lng-A-T  | 97   | chr2:27582250-27582350 |
| chr2 | 27589650 | 27589750 | 1188-Lng-A-T | 45   | chr2:27589650-27589750 |
| chr2 | 27798550 | 27798650 | 1188-Lng-A-T | 36   | chr2:27798550-27798650 |
| chr2 | 27811850 | 27811950 | 1004-Lng-A-T | 53   | chr2:27811850-27811950 |
| chr2 | 28387750 | 28387850 | 1223-Lng-A-T | 57   | chr2:28387750-28387850 |
| chr2 | 28526450 | 28526550 | 1274-Lng-A-T | 111  | chr2:28526450-28526550 |
| chr2 | 28700750 | 28700850 | 1090-Lng-A-T | 117  | chr2:28700750-28700850 |
| chr2 | 28886450 | 28886550 | 901-Lng-D-T  | 194  | chr2:28886450-28886550 |
| chr2 | 29026050 | 29026150 | 1065-Lng-C-T | 98   | chr2:29026050-29026150 |
| chr2 | 29135650 | 29135750 | 1223-Lng-A-T | 52   | chr2:29135650-29135750 |
| chr2 | 29239450 | 29239550 | 1223-Lng-B-T | 65   | chr2:29239450-29239550 |
| chr2 | 29309550 | 29309650 | 1065-Lng-B-T | 70   | chr2:29309550-29309650 |
| chr2 | 29497550 | 29497650 | 901-Lng-C-T  | 39   | chr2:29497550-29497650 |
| chr2 | 29515950 | 29516050 | 1274-Lng-A-T | 52   | chr2:29515950-29516050 |
| chr2 | 29755750 | 29755850 | 1274-Lng-A-T | 50   | chr2:29755750-29755850 |
| chr2 | 29832550 | 29832650 | 1274-Lng-A-T | 79   | chr2:29832550-29832650 |
| chr2 | 29843450 | 29843550 | 1065-Lng-A-T | 201  | chr2:29843450-29843550 |
| chr2 | 29923850 | 29923950 | 1274-Lng-A-T | 57   | chr2:29923850-29923950 |
| chr2 | 30152550 | 30152650 | 1274-Lng-A-T | 65   | chr2:30152550-30152650 |
| chr2 | 30215350 | 30215450 | 1274-Lng-A-T | 55   | chr2:30215350-30215450 |
| chr2 | 30269650 | 30269750 | 1072-Lng-A-T | 195  | chr2:30269650-30269750 |
| chr2 | 30909650 | 30909750 | 1274-Lng-A-T | 102  | chr2:30909650-30909750 |
| chr2 | 30934250 | 30934350 | 901-Lng-B-T  | 114  | chr2:30934250-30934350 |
| chr2 | 30948450 | 30948550 | 1065-Lng-B-T | 66   | chr2:30948450-30948550 |
| chr2 | 30976850 | 30976950 | 1223-Lng-A-T | 116  | chr2:30976850-30976950 |
| chr2 | 31029850 | 31029950 | 1100-Lng-A-T | 119  | chr2:31029850-31029950 |
| chr2 | 31461050 | 31461150 | 1100-Lng-A-T | 134  | chr2:31461050-31461150 |
| chr2 | 31588950 | 31589050 | 1090-Lng-A-T | 78   | chr2:31588950-31589050 |
| chr2 | 31627750 | 31627850 | 1065-Lng-C-T | 68   | chr2:31627750-31627850 |
| chr2 | 31853550 | 31853650 | 901-Lng-A-T  | 68   | chr2:31853550-31853650 |
| chr2 | 31892550 | 31892650 | 1188-Lng-A-T | 110  | chr2:31892550-31892650 |
| chr2 | 32091150 | 32091250 | 1188-Lng-A-T | 40   | chr2:32091150-32091250 |
| chr2 | 32135650 | 32135750 | 1223-Lng-D-T | 211  | chr2:32135650-32135750 |
| chr2 | 32146750 | 32146850 | 901-Lng-A-T  | 77   | chr2:32146750-32146850 |
| chr2 | 32384550 | 32384650 | 1188-Lng-A-T | 36   | chr2:32384550-32384650 |
| chr2 | 32418250 | 32418350 | 1100-Lng-B-T | 3044 | chr2:32418250-32418350 |
| chr2 | 32445550 | 32445650 | 1072-Lng-A-T | 179  | chr2:32445550-32445650 |

**Table S2: SB Insertion regions**

|      |          |          |              |     |                        |
|------|----------|----------|--------------|-----|------------------------|
| chr2 | 32848550 | 32848650 | 901-Lng-D-T  | 103 | chr2:32848550-32848650 |
| chr2 | 33093250 | 33093350 | 1100-Lng-A-T | 70  | chr2:33093250-33093350 |
| chr2 | 33214050 | 33214150 | 1188-Lng-A-T | 128 | chr2:33214050-33214150 |
| chr2 | 33218450 | 33218550 | 1223-Lng-B-T | 81  | chr2:33218450-33218550 |
| chr2 | 33311850 | 33311950 | 1100-Lng-A-T | 52  | chr2:33311850-33311950 |
| chr2 | 33685950 | 33686050 | 1151-Lng-A-T | 414 | chr2:33685950-33686050 |
| chr2 | 33752850 | 33752950 | 1065-Lng-B-T | 217 | chr2:33752850-33752950 |
| chr2 | 33788550 | 33788650 | 1090-Lng-A-T | 61  | chr2:33788550-33788650 |
| chr2 | 34036150 | 34036250 | 1004-Lng-A-T | 85  | chr2:34036150-34036250 |
| chr2 | 34045350 | 34045450 | 1004-Lng-A-T | 127 | chr2:34045350-34045450 |
| chr2 | 34118350 | 34118450 | 1274-Lng-A-T | 100 | chr2:34118350-34118450 |
| chr2 | 34148250 | 34148350 | 1223-Lng-B-T | 46  | chr2:34148250-34148350 |
| chr2 | 34255150 | 34255250 | 1004-Lng-A-T | 197 | chr2:34255150-34255250 |
| chr2 | 34265250 | 34265350 | 1151-Lng-A-T | 119 | chr2:34265250-34265350 |
| chr2 | 34300250 | 34300350 | 1065-Lng-B-T | 70  | chr2:34300250-34300350 |
| chr2 | 34338950 | 34339050 | 1274-Lng-A-T | 114 | chr2:34338950-34339050 |
| chr2 | 34379150 | 34379250 | 1090-Lng-A-T | 94  | chr2:34379150-34379250 |
| chr2 | 34392350 | 34392450 | 1274-Lng-A-T | 153 | chr2:34392350-34392450 |
| chr2 | 34401050 | 34401150 | 1151-Lng-A-T | 73  | chr2:34401050-34401150 |
| chr2 | 34406050 | 34406150 | 901-Lng-A-T  | 502 | chr2:34406050-34406150 |
| chr2 | 34468250 | 34468350 | 1065-Lng-C-T | 213 | chr2:34468250-34468350 |
| chr2 | 34473450 | 34473550 | 1100-Lng-B-T | 109 | chr2:34473450-34473550 |
| chr2 | 34602150 | 34602250 | 1065-Lng-B-T | 63  | chr2:34602150-34602250 |
| chr2 | 34626350 | 34626450 | 1065-Lng-A-T | 43  | chr2:34626350-34626450 |
| chr2 | 34659950 | 34660050 | 1004-Lng-A-T | 69  | chr2:34659950-34660050 |
| chr2 | 34811950 | 34812050 | 901-Lng-B-T  | 134 | chr2:34811950-34812050 |
| chr2 | 34990150 | 34990250 | 846-Lng-A-T  | 152 | chr2:34990150-34990250 |
| chr2 | 35042550 | 35042650 | 1090-Lng-A-T | 53  | chr2:35042550-35042650 |
| chr2 | 35048250 | 35048350 | 1090-Lng-B-T | 321 | chr2:35048250-35048350 |
| chr2 | 35130950 | 35131050 | 1152-Lng-A-T | 97  | chr2:35130950-35131050 |
| chr2 | 35494950 | 35495050 | 1274-Lng-A-T | 66  | chr2:35494950-35495050 |
| chr2 | 35567050 | 35567150 | 1152-Lng-A-T | 151 | chr2:35567050-35567150 |
| chr2 | 35704050 | 35704150 | 1004-Lng-A-T | 913 | chr2:35704050-35704150 |
| chr2 | 35762850 | 35762950 | 1100-Lng-B-T | 185 | chr2:35762850-35762950 |
| chr2 | 35830550 | 35830650 | 1065-Lng-A-T | 82  | chr2:35830550-35830650 |
| chr2 | 35830550 | 35830650 | 1065-Lng-C-T | 376 | chr2:35830550-35830650 |
| chr2 | 35984950 | 35985050 | 1072-Lng-A-T | 83  | chr2:35984950-35985050 |
| chr2 | 36000550 | 36000650 | 846-Lng-A-T  | 42  | chr2:36000550-36000650 |
| chr2 | 36102550 | 36102650 | 1188-Lng-A-T | 34  | chr2:36102550-36102650 |
| chr2 | 36105350 | 36105450 | 1167-Lng-A-T | 59  | chr2:36105350-36105450 |
| chr2 | 36140650 | 36140750 | 1223-Lng-D-T | 40  | chr2:36140650-36140750 |
| chr2 | 36381350 | 36381450 | 901-Lng-B-T  | 90  | chr2:36381350-36381450 |
| chr2 | 36915750 | 36915850 | 1065-Lng-B-T | 46  | chr2:36915750-36915850 |
| chr2 | 36949950 | 36950050 | 1065-Lng-B-T | 55  | chr2:36949950-36950050 |
| chr2 | 37047450 | 37047550 | 1090-Lng-B-T | 653 | chr2:37047450-37047550 |
| chr2 | 37206750 | 37206850 | 1090-Lng-A-T | 71  | chr2:37206750-37206850 |

**Table S2: SB Insertion regions**

|      |          |          |              |       |                        |
|------|----------|----------|--------------|-------|------------------------|
| chr2 | 37346950 | 37347050 | 1065-Lng-C-T | 1054  | chr2:37346950-37347050 |
| chr2 | 37365550 | 37365650 | 1152-Lng-A-T | 76    | chr2:37365550-37365650 |
| chr2 | 37369450 | 37369550 | 1223-Lng-C-T | 43    | chr2:37369450-37369550 |
| chr2 | 37499350 | 37499450 | 1065-Lng-C-T | 82    | chr2:37499350-37499450 |
| chr2 | 37570250 | 37570350 | 1152-Lng-A-T | 125   | chr2:37570250-37570350 |
| chr2 | 37580050 | 37580150 | 1090-Lng-A-T | 62    | chr2:37580050-37580150 |
| chr2 | 37675950 | 37676050 | 1065-Lng-B-T | 78    | chr2:37675950-37676050 |
| chr2 | 37826850 | 37826950 | 1274-Lng-A-T | 52    | chr2:37826850-37826950 |
| chr2 | 37830150 | 37830250 | 1188-Lng-A-T | 55    | chr2:37830150-37830250 |
| chr2 | 37834050 | 37834150 | 1072-Lng-A-T | 54    | chr2:37834050-37834150 |
| chr2 | 37851850 | 37851950 | 1188-Lng-A-T | 22116 | chr2:37851850-37851950 |
| chr2 | 37857050 | 37857150 | 901-Lng-A-T  | 90    | chr2:37857050-37857150 |
| chr2 | 37894550 | 37894650 | 1188-Lng-A-T | 51    | chr2:37894550-37894650 |
| chr2 | 37946750 | 37946850 | 1065-Lng-A-T | 54    | chr2:37946750-37946850 |
| chr2 | 38029150 | 38029250 | 1188-Lng-A-T | 352   | chr2:38029150-38029250 |
| chr2 | 38078750 | 38078850 | 1004-Lng-A-T | 89    | chr2:38078750-38078850 |
| chr2 | 38097750 | 38097850 | 901-Lng-C-T  | 84    | chr2:38097750-38097850 |
| chr2 | 38133950 | 38134050 | 1223-Lng-D-T | 202   | chr2:38133950-38134050 |
| chr2 | 38432750 | 38432850 | 1167-Lng-A-T | 128   | chr2:38432750-38432850 |
| chr2 | 38454650 | 38454750 | 1100-Lng-A-T | 62    | chr2:38454650-38454750 |
| chr2 | 38477450 | 38477550 | 1151-Lng-A-T | 243   | chr2:38477450-38477550 |
| chr2 | 38602050 | 38602150 | 1223-Lng-A-T | 128   | chr2:38602050-38602150 |
| chr2 | 38652950 | 38653050 | 1100-Lng-A-T | 113   | chr2:38652950-38653050 |
| chr2 | 38674750 | 38674850 | 1151-Lng-A-T | 70    | chr2:38674750-38674850 |
| chr2 | 38749050 | 38749150 | 901-Lng-C-T  | 156   | chr2:38749050-38749150 |
| chr2 | 38840750 | 38840850 | 1065-Lng-C-T | 71    | chr2:38840750-38840850 |
| chr2 | 38879750 | 38879850 | 1223-Lng-C-T | 46    | chr2:38879750-38879850 |
| chr2 | 38934850 | 38934950 | 1100-Lng-A-T | 77    | chr2:38934850-38934950 |
| chr2 | 39014150 | 39014250 | 1223-Lng-D-T | 46    | chr2:39014150-39014250 |
| chr2 | 39047450 | 39047550 | 901-Lng-C-T  | 64    | chr2:39047450-39047550 |
| chr2 | 39073250 | 39073350 | 1090-Lng-A-T | 384   | chr2:39073250-39073350 |
| chr2 | 39080550 | 39080650 | 1072-Lng-A-T | 128   | chr2:39080550-39080650 |
| chr2 | 39308650 | 39308750 | 1065-Lng-B-T | 55    | chr2:39308650-39308750 |
| chr2 | 39403350 | 39403450 | 1223-Lng-C-T | 48    | chr2:39403350-39403450 |
| chr2 | 39403350 | 39403450 | 1065-Lng-C-T | 72    | chr2:39403350-39403450 |
| chr2 | 39879350 | 39879450 | 901-Lng-A-T  | 63    | chr2:39879350-39879450 |
| chr2 | 39971650 | 39971750 | 1065-Lng-B-T | 87    | chr2:39971650-39971750 |
| chr2 | 40018650 | 40018750 | 1274-Lng-A-T | 177   | chr2:40018650-40018750 |
| chr2 | 40391850 | 40391950 | 1223-Lng-B-T | 257   | chr2:40391850-40391950 |
| chr2 | 40394250 | 40394350 | 1152-Lng-A-T | 129   | chr2:40394250-40394350 |
| chr2 | 40493550 | 40493650 | 1274-Lng-A-T | 171   | chr2:40493550-40493650 |
| chr2 | 40596750 | 40596850 | 901-Lng-C-T  | 32    | chr2:40596750-40596850 |
| chr2 | 40600850 | 40600950 | 901-Lng-A-T  | 110   | chr2:40600850-40600950 |
| chr2 | 40772350 | 40772450 | 1065-Lng-A-T | 68    | chr2:40772350-40772450 |
| chr2 | 41000550 | 41000650 | 1065-Lng-A-T | 44    | chr2:41000550-41000650 |
| chr2 | 41011050 | 41011150 | 1072-Lng-A-T | 65    | chr2:41011050-41011150 |



**Table S2: SB Insertion regions**

|      |          |          |              |      |                        |
|------|----------|----------|--------------|------|------------------------|
| chr2 | 41045550 | 41045650 | 1065-Lng-B-T | 79   | chr2:41045550-41045650 |
| chr2 | 41177050 | 41177150 | 1090-Lng-B-T | 1698 | chr2:41177050-41177150 |
| chr2 | 41503050 | 41503150 | 1274-Lng-A-T | 65   | chr2:41503050-41503150 |
| chr2 | 41753850 | 41753950 | 901-Lng-C-T  | 44   | chr2:41753850-41753950 |
| chr2 | 41778350 | 41778450 | 1065-Lng-C-T | 105  | chr2:41778350-41778450 |
| chr2 | 41937150 | 41937250 | 1065-Lng-A-T | 338  | chr2:41937150-41937250 |
| chr2 | 41985050 | 41985150 | 1065-Lng-C-T | 88   | chr2:41985050-41985150 |
| chr2 | 42014950 | 42015050 | 1188-Lng-A-T | 47   | chr2:42014950-42015050 |
| chr2 | 42041150 | 42041250 | 1065-Lng-C-T | 74   | chr2:42041150-42041250 |
| chr2 | 42141850 | 42141950 | 901-Lng-C-T  | 49   | chr2:42141850-42141950 |
| chr2 | 42266550 | 42266650 | 1152-Lng-A-T | 418  | chr2:42266550-42266650 |
| chr2 | 42359950 | 42360050 | 1223-Lng-C-T | 49   | chr2:42359950-42360050 |
| chr2 | 42612350 | 42612450 | 1100-Lng-A-T | 91   | chr2:42612350-42612450 |
| chr2 | 42663750 | 42663850 | 1090-Lng-A-T | 90   | chr2:42663750-42663850 |
| chr2 | 42952650 | 42952750 | 1100-Lng-A-T | 64   | chr2:42952650-42952750 |
| chr2 | 43677850 | 43677950 | 901-Lng-A-T  | 53   | chr2:43677850-43677950 |
| chr2 | 43846750 | 43846850 | 901-Lng-A-T  | 65   | chr2:43846750-43846850 |
| chr2 | 43871450 | 43871550 | 1065-Lng-C-T | 69   | chr2:43871450-43871550 |
| chr2 | 43962950 | 43963050 | 901-Lng-A-T  | 85   | chr2:43962950-43963050 |
| chr2 | 44348450 | 44348550 | 901-Lng-C-T  | 345  | chr2:44348450-44348550 |
| chr2 | 44398450 | 44398550 | 1274-Lng-A-T | 73   | chr2:44398450-44398550 |
| chr2 | 44402450 | 44402550 | 1223-Lng-D-T | 43   | chr2:44402450-44402550 |
| chr2 | 44613550 | 44613650 | 1004-Lng-A-T | 59   | chr2:44613550-44613650 |
| chr2 | 44618750 | 44618850 | 1004-Lng-A-T | 116  | chr2:44618750-44618850 |
| chr2 | 44718450 | 44718550 | 1065-Lng-B-T | 45   | chr2:44718450-44718550 |
| chr2 | 44722950 | 44723050 | 1065-Lng-C-T | 63   | chr2:44722950-44723050 |
| chr2 | 44857750 | 44857850 | 1100-Lng-A-T | 82   | chr2:44857750-44857850 |
| chr2 | 45125450 | 45125550 | 1152-Lng-A-T | 40   | chr2:45125450-45125550 |
| chr2 | 45444450 | 45444550 | 1065-Lng-C-T | 116  | chr2:45444450-45444550 |
| chr2 | 45452350 | 45452450 | 1065-Lng-C-T | 65   | chr2:45452350-45452450 |
| chr2 | 45920150 | 45920250 | 1065-Lng-A-T | 40   | chr2:45920150-45920250 |
| chr2 | 46924450 | 46924550 | 1223-Lng-D-T | 41   | chr2:46924450-46924550 |
| chr2 | 47017750 | 47017850 | 1065-Lng-C-T | 68   | chr2:47017750-47017850 |
| chr2 | 47156650 | 47156750 | 901-Lng-A-T  | 460  | chr2:47156650-47156750 |
| chr2 | 47288950 | 47289050 | 1072-Lng-A-T | 186  | chr2:47288950-47289050 |
| chr2 | 47390850 | 47390950 | 1065-Lng-A-T | 44   | chr2:47390850-47390950 |
| chr2 | 47696650 | 47696750 | 1065-Lng-B-T | 467  | chr2:47696650-47696750 |
| chr2 | 48066050 | 48066150 | 1223-Lng-D-T | 40   | chr2:48066050-48066150 |
| chr2 | 48066550 | 48066650 | 1090-Lng-A-T | 93   | chr2:48066550-48066650 |
| chr2 | 48272450 | 48272550 | 1090-Lng-A-T | 89   | chr2:48272450-48272550 |
| chr2 | 48354950 | 48355050 | 1065-Lng-C-T | 65   | chr2:48354950-48355050 |
| chr2 | 48504450 | 48504550 | 1152-Lng-A-T | 72   | chr2:48504450-48504550 |
| chr2 | 48573050 | 48573150 | 901-Lng-C-T  | 45   | chr2:48573050-48573150 |
| chr2 | 48585550 | 48585650 | 1223-Lng-A-T | 67   | chr2:48585550-48585650 |
| chr2 | 48673650 | 48673750 | 1100-Lng-A-T | 117  | chr2:48673650-48673750 |
| chr2 | 48681650 | 48681750 | 1090-Lng-B-T | 240  | chr2:48681650-48681750 |

**Table S2: SB Insertion regions**

|      |          |          |              |      |                        |
|------|----------|----------|--------------|------|------------------------|
| chr2 | 48684150 | 48684250 | 1151-Lng-A-T | 77   | chr2:48684150-48684250 |
| chr2 | 48686850 | 48686950 | 901-Lng-C-T  | 219  | chr2:48686850-48686950 |
| chr2 | 48719650 | 48719750 | 1223-Lng-D-T | 40   | chr2:48719650-48719750 |
| chr2 | 48731350 | 48731450 | 1065-Lng-A-T | 122  | chr2:48731350-48731450 |
| chr2 | 48770550 | 48770650 | 1223-Lng-B-T | 41   | chr2:48770550-48770650 |
| chr2 | 48838050 | 48838150 | 1188-Lng-A-T | 124  | chr2:48838050-48838150 |
| chr2 | 48869850 | 48869950 | 1151-Lng-A-T | 69   | chr2:48869850-48869950 |
| chr2 | 48890350 | 48890450 | 901-Lng-B-T  | 239  | chr2:48890350-48890450 |
| chr2 | 48926750 | 48926850 | 1223-Lng-B-T | 245  | chr2:48926750-48926850 |
| chr2 | 48970750 | 48970850 | 901-Lng-B-T  | 114  | chr2:48970750-48970850 |
| chr2 | 49032550 | 49032650 | 1065-Lng-B-T | 71   | chr2:49032550-49032650 |
| chr2 | 49032950 | 49033050 | 901-Lng-A-T  | 104  | chr2:49032950-49033050 |
| chr2 | 49046250 | 49046350 | 1065-Lng-A-T | 41   | chr2:49046250-49046350 |
| chr2 | 49048150 | 49048250 | 901-Lng-B-T  | 40   | chr2:49048150-49048250 |
| chr2 | 49067350 | 49067450 | 1167-Lng-A-T | 49   | chr2:49067350-49067450 |
| chr2 | 49100750 | 49100850 | 846-Lng-A-T  | 1699 | chr2:49100750-49100850 |
| chr2 | 49115450 | 49115550 | 1065-Lng-C-T | 70   | chr2:49115450-49115550 |
| chr2 | 49303450 | 49303550 | 1090-Lng-A-T | 85   | chr2:49303450-49303550 |
| chr2 | 49346250 | 49346350 | 1274-Lng-A-T | 57   | chr2:49346250-49346350 |
| chr2 | 49357750 | 49357850 | 1004-Lng-A-T | 52   | chr2:49357750-49357850 |
| chr2 | 49358550 | 49358650 | 1090-Lng-B-T | 152  | chr2:49358550-49358650 |
| chr2 | 49360450 | 49360550 | 1274-Lng-A-T | 102  | chr2:49360450-49360550 |
| chr2 | 49363250 | 49363350 | 901-Lng-B-T  | 137  | chr2:49363250-49363350 |
| chr2 | 49376750 | 49376850 | 1188-Lng-A-T | 398  | chr2:49376750-49376850 |
| chr2 | 49397350 | 49397450 | 1090-Lng-B-T | 1051 | chr2:49397350-49397450 |
| chr2 | 49412850 | 49412950 | 1223-Lng-B-T | 38   | chr2:49412850-49412950 |
| chr2 | 49703450 | 49703550 | 1090-Lng-A-T | 82   | chr2:49703450-49703550 |
| chr2 | 49747150 | 49747250 | 1223-Lng-D-T | 41   | chr2:49747150-49747250 |
| chr2 | 49768250 | 49768350 | 1274-Lng-A-T | 56   | chr2:49768250-49768350 |
| chr2 | 49821650 | 49821750 | 846-Lng-A-T  | 109  | chr2:49821650-49821750 |
| chr2 | 49848650 | 49848750 | 901-Lng-C-T  | 85   | chr2:49848650-49848750 |
| chr2 | 49866750 | 49866850 | 1065-Lng-A-T | 127  | chr2:49866750-49866850 |
| chr2 | 49917950 | 49918050 | 901-Lng-B-T  | 44   | chr2:49917950-49918050 |
| chr2 | 50136350 | 50136450 | 1223-Lng-B-T | 164  | chr2:50136350-50136450 |
| chr2 | 50137550 | 50137650 | 1072-Lng-A-T | 49   | chr2:50137550-50137650 |
| chr2 | 50140650 | 50140750 | 901-Lng-C-T  | 102  | chr2:50140650-50140750 |
| chr2 | 50142650 | 50142750 | 1100-Lng-B-T | 64   | chr2:50142650-50142750 |
| chr2 | 50264850 | 50264950 | 901-Lng-A-T  | 67   | chr2:50264850-50264950 |
| chr2 | 50282650 | 50282750 | 901-Lng-B-T  | 236  | chr2:50282650-50282750 |
| chr2 | 50548450 | 50548550 | 1065-Lng-C-T | 73   | chr2:50548450-50548550 |
| chr2 | 50970550 | 50970650 | 846-Lng-A-T  | 58   | chr2:50970550-50970650 |
| chr2 | 51241850 | 51241950 | 901-Lng-B-T  | 37   | chr2:51241850-51241950 |
| chr2 | 51263450 | 51263550 | 1004-Lng-A-T | 77   | chr2:51263450-51263550 |
| chr2 | 51524250 | 51524350 | 1065-Lng-C-T | 66   | chr2:51524250-51524350 |
| chr2 | 51654850 | 51654950 | 901-Lng-A-T  | 86   | chr2:51654850-51654950 |
| chr2 | 51836150 | 51836250 | 901-Lng-C-T  | 79   | chr2:51836150-51836250 |

**Table S2: SB Insertion regions**

|      |          |          |              |      |                        |
|------|----------|----------|--------------|------|------------------------|
| chr2 | 51865250 | 51865350 | 1223-Lng-B-T | 123  | chr2:51865250-51865350 |
| chr2 | 51951550 | 51951650 | 846-Lng-A-T  | 93   | chr2:51951550-51951650 |
| chr2 | 51969550 | 51969650 | 1090-Lng-A-T | 62   | chr2:51969550-51969650 |
| chr2 | 52297650 | 52297750 | 901-Lng-D-T  | 154  | chr2:52297650-52297750 |
| chr2 | 52340450 | 52340550 | 901-Lng-C-T  | 65   | chr2:52340450-52340550 |
| chr2 | 52433650 | 52433750 | 901-Lng-D-T  | 154  | chr2:52433650-52433750 |
| chr2 | 52449250 | 52449350 | 1223-Lng-B-T | 85   | chr2:52449250-52449350 |
| chr2 | 52732650 | 52732750 | 1223-Lng-B-T | 40   | chr2:52732650-52732750 |
| chr2 | 53024650 | 53024750 | 1223-Lng-B-T | 35   | chr2:53024650-53024750 |
| chr2 | 53053250 | 53053350 | 901-Lng-C-T  | 66   | chr2:53053250-53053350 |
| chr2 | 53275150 | 53275250 | 901-Lng-C-T  | 63   | chr2:53275150-53275250 |
| chr2 | 53578350 | 53578450 | 901-Lng-C-T  | 133  | chr2:53578350-53578450 |
| chr2 | 53733150 | 53733250 | 1090-Lng-A-T | 81   | chr2:53733150-53733250 |
| chr2 | 53758850 | 53758950 | 1152-Lng-A-T | 185  | chr2:53758850-53758950 |
| chr2 | 54041350 | 54041450 | 1223-Lng-A-T | 134  | chr2:54041350-54041450 |
| chr2 | 54267150 | 54267250 | 1065-Lng-A-T | 34   | chr2:54267150-54267250 |
| chr2 | 54329650 | 54329750 | 1004-Lng-A-T | 85   | chr2:54329650-54329750 |
| chr2 | 54501350 | 54501450 | 1065-Lng-C-T | 61   | chr2:54501350-54501450 |
| chr2 | 54921850 | 54921950 | 1223-Lng-A-T | 182  | chr2:54921850-54921950 |
| chr2 | 54951150 | 54951250 | 901-Lng-A-T  | 173  | chr2:54951150-54951250 |
| chr2 | 55164650 | 55164750 | 1188-Lng-A-T | 106  | chr2:55164650-55164750 |
| chr2 | 55229150 | 55229250 | 1072-Lng-A-T | 56   | chr2:55229150-55229250 |
| chr2 | 55401450 | 55401550 | 1223-Lng-D-T | 43   | chr2:55401450-55401550 |
| chr2 | 55426650 | 55426750 | 846-Lng-A-T  | 174  | chr2:55426650-55426750 |
| chr2 | 55649350 | 55649450 | 1065-Lng-C-T | 61   | chr2:55649350-55649450 |
| chr2 | 55652650 | 55652750 | 1223-Lng-B-T | 184  | chr2:55652650-55652750 |
| chr2 | 55707750 | 55707850 | 901-Lng-A-T  | 74   | chr2:55707750-55707850 |
| chr2 | 55820550 | 55820650 | 1274-Lng-A-T | 85   | chr2:55820550-55820650 |
| chr2 | 56314250 | 56314350 | 1152-Lng-A-T | 49   | chr2:56314250-56314350 |
| chr2 | 56336150 | 56336250 | 846-Lng-A-T  | 160  | chr2:56336150-56336250 |
| chr2 | 56382250 | 56382350 | 1072-Lng-A-T | 168  | chr2:56382250-56382350 |
| chr2 | 56480050 | 56480150 | 1274-Lng-A-T | 90   | chr2:56480050-56480150 |
| chr2 | 56817350 | 56817450 | 901-Lng-B-T  | 126  | chr2:56817350-56817450 |
| chr2 | 56936850 | 56936950 | 901-Lng-B-T  | 99   | chr2:56936850-56936950 |
| chr2 | 56975450 | 56975550 | 901-Lng-A-T  | 65   | chr2:56975450-56975550 |
| chr2 | 56988950 | 56989050 | 1090-Lng-A-T | 78   | chr2:56988950-56989050 |
| chr2 | 57034950 | 57035050 | 1152-Lng-A-T | 148  | chr2:57034950-57035050 |
| chr2 | 57109550 | 57109650 | 1274-Lng-A-T | 68   | chr2:57109550-57109650 |
| chr2 | 57130650 | 57130750 | 1065-Lng-A-T | 56   | chr2:57130650-57130750 |
| chr2 | 57992450 | 57992550 | 1152-Lng-A-T | 43   | chr2:57992450-57992550 |
| chr2 | 58237450 | 58237550 | 1065-Lng-C-T | 100  | chr2:58237450-58237550 |
| chr2 | 58335250 | 58335350 | 1152-Lng-A-T | 39   | chr2:58335250-58335350 |
| chr2 | 58370350 | 58370450 | 1223-Lng-B-T | 55   | chr2:58370350-58370450 |
| chr2 | 58376350 | 58376450 | 1100-Lng-A-T | 6678 | chr2:58376350-58376450 |
| chr2 | 58379150 | 58379250 | 901-Lng-A-T  | 122  | chr2:58379150-58379250 |
| chr2 | 58380650 | 58380750 | 1152-Lng-A-T | 68   | chr2:58380650-58380750 |

**Table S2: SB Insertion regions**

|      |          |          |              |       |                        |
|------|----------|----------|--------------|-------|------------------------|
| chr2 | 58403450 | 58403550 | 1065-Lng-A-T | 84    | chr2:58403450-58403550 |
| chr2 | 58671850 | 58671950 | 1151-Lng-A-T | 54    | chr2:58671850-58671950 |
| chr2 | 58772550 | 58772650 | 1152-Lng-A-T | 42    | chr2:58772550-58772650 |
| chr2 | 58960350 | 58960450 | 1100-Lng-A-T | 61    | chr2:58960350-58960450 |
| chr2 | 59028150 | 59028250 | 1151-Lng-A-T | 10643 | chr2:59028150-59028250 |
| chr2 | 59049450 | 59049550 | 1223-Lng-C-T | 56    | chr2:59049450-59049550 |
| chr2 | 59106350 | 59106450 | 901-Lng-B-T  | 108   | chr2:59106350-59106450 |
| chr2 | 59124450 | 59124550 | 1188-Lng-A-T | 146   | chr2:59124450-59124550 |
| chr2 | 59128350 | 59128450 | 1090-Lng-A-T | 57    | chr2:59128350-59128450 |
| chr2 | 59159950 | 59160050 | 1152-Lng-A-T | 143   | chr2:59159950-59160050 |
| chr2 | 59227650 | 59227750 | 1223-Lng-D-T | 44    | chr2:59227650-59227750 |
| chr2 | 59410250 | 59410350 | 1167-Lng-A-T | 89    | chr2:59410250-59410350 |
| chr2 | 59421550 | 59421650 | 846-Lng-A-T  | 71    | chr2:59421550-59421650 |
| chr2 | 59424750 | 59424850 | 1223-Lng-A-T | 143   | chr2:59424750-59424850 |
| chr2 | 59549350 | 59549450 | 1072-Lng-A-T | 315   | chr2:59549350-59549450 |
| chr2 | 59564550 | 59564650 | 1223-Lng-A-T | 994   | chr2:59564550-59564650 |
| chr2 | 59565950 | 59566050 | 1151-Lng-A-T | 287   | chr2:59565950-59566050 |
| chr2 | 59615650 | 59615750 | 1100-Lng-A-T | 81    | chr2:59615650-59615750 |
| chr2 | 59685350 | 59685450 | 1223-Lng-A-T | 183   | chr2:59685350-59685450 |
| chr2 | 59726150 | 59726250 | 846-Lng-A-T  | 284   | chr2:59726150-59726250 |
| chr2 | 59739150 | 59739250 | 1274-Lng-A-T | 134   | chr2:59739150-59739250 |
| chr2 | 59757650 | 59757750 | 1223-Lng-B-T | 224   | chr2:59757650-59757750 |
| chr2 | 59762350 | 59762450 | 1223-Lng-B-T | 65    | chr2:59762350-59762450 |
| chr2 | 59776550 | 59776650 | 1152-Lng-A-T | 91    | chr2:59776550-59776650 |
| chr2 | 59787450 | 59787550 | 1100-Lng-A-T | 64    | chr2:59787450-59787550 |
| chr2 | 59825150 | 59825250 | 1151-Lng-A-T | 81    | chr2:59825150-59825250 |
| chr2 | 59861650 | 59861750 | 1004-Lng-A-T | 246   | chr2:59861650-59861750 |
| chr2 | 59909350 | 59909450 | 1223-Lng-C-T | 43    | chr2:59909350-59909450 |
| chr2 | 59952250 | 59952350 | 901-Lng-A-T  | 50    | chr2:59952250-59952350 |
| chr2 | 59961250 | 59961350 | 1223-Lng-B-T | 103   | chr2:59961250-59961350 |
| chr2 | 60063950 | 60064050 | 1100-Lng-A-T | 60    | chr2:60063950-60064050 |
| chr2 | 60065050 | 60065150 | 901-Lng-C-T  | 50    | chr2:60065050-60065150 |
| chr2 | 60085650 | 60085750 | 1188-Lng-A-T | 97    | chr2:60085650-60085750 |
| chr2 | 60093050 | 60093150 | 901-Lng-A-T  | 75    | chr2:60093050-60093150 |
| chr2 | 60098550 | 60098650 | 901-Lng-C-T  | 70    | chr2:60098550-60098650 |
| chr2 | 60112150 | 60112250 | 901-Lng-C-T  | 34    | chr2:60112150-60112250 |
| chr2 | 60464250 | 60464350 | 1065-Lng-C-T | 101   | chr2:60464250-60464350 |
| chr2 | 60469550 | 60469650 | 1167-Lng-A-T | 1621  | chr2:60469550-60469650 |
| chr2 | 60541150 | 60541250 | 1100-Lng-A-T | 156   | chr2:60541150-60541250 |
| chr2 | 60586650 | 60586750 | 1274-Lng-A-T | 77    | chr2:60586650-60586750 |
| chr2 | 60621850 | 60621950 | 1223-Lng-D-T | 52    | chr2:60621850-60621950 |
| chr2 | 60631850 | 60631950 | 1274-Lng-A-T | 60    | chr2:60631850-60631950 |
| chr2 | 60653650 | 60653750 | 1065-Lng-A-T | 71    | chr2:60653650-60653750 |
| chr2 | 60751150 | 60751250 | 901-Lng-C-T  | 43    | chr2:60751150-60751250 |
| chr2 | 60760050 | 60760150 | 1223-Lng-D-T | 57    | chr2:60760050-60760150 |
| chr2 | 60772250 | 60772350 | 1004-Lng-A-T | 637   | chr2:60772250-60772350 |

**Table S2: SB Insertion regions**

|      |          |          |              |     |                        |
|------|----------|----------|--------------|-----|------------------------|
| chr2 | 60794750 | 60794850 | 901-Lng-B-T  | 152 | chr2:60794750-60794850 |
| chr2 | 60912050 | 60912150 | 1072-Lng-A-T | 64  | chr2:60912050-60912150 |
| chr2 | 60943450 | 60943550 | 1152-Lng-A-T | 76  | chr2:60943450-60943550 |
| chr2 | 61108850 | 61108950 | 1100-Lng-A-T | 91  | chr2:61108850-61108950 |
| chr2 | 61450450 | 61450550 | 1274-Lng-A-T | 217 | chr2:61450450-61450550 |
| chr2 | 61528450 | 61528550 | 1223-Lng-C-T | 64  | chr2:61528450-61528550 |
| chr2 | 61602250 | 61602350 | 1151-Lng-A-T | 717 | chr2:61602250-61602350 |
| chr2 | 61932350 | 61932450 | 1065-Lng-A-T | 714 | chr2:61932350-61932450 |
| chr2 | 62085750 | 62085850 | 1151-Lng-A-T | 63  | chr2:62085750-62085850 |
| chr2 | 62165050 | 62165150 | 1065-Lng-B-T | 45  | chr2:62165050-62165150 |
| chr2 | 62184850 | 62184950 | 1090-Lng-A-T | 535 | chr2:62184850-62184950 |
| chr2 | 62369050 | 62369150 | 1090-Lng-A-T | 126 | chr2:62369050-62369150 |
| chr2 | 62507750 | 62507850 | 1065-Lng-A-T | 156 | chr2:62507750-62507850 |
| chr2 | 62624650 | 62624750 | 901-Lng-A-T  | 145 | chr2:62624650-62624750 |
| chr2 | 62677150 | 62677250 | 1072-Lng-A-T | 97  | chr2:62677150-62677250 |
| chr2 | 62791550 | 62791650 | 901-Lng-C-T  | 34  | chr2:62791550-62791650 |
| chr2 | 63034850 | 63034950 | 1167-Lng-A-T | 103 | chr2:63034850-63034950 |
| chr2 | 63076550 | 63076650 | 1065-Lng-C-T | 66  | chr2:63076550-63076650 |
| chr2 | 63178150 | 63178250 | 1100-Lng-A-T | 129 | chr2:63178150-63178250 |
| chr2 | 63235250 | 63235350 | 901-Lng-B-T  | 60  | chr2:63235250-63235350 |
| chr2 | 63281350 | 63281450 | 901-Lng-A-T  | 145 | chr2:63281350-63281450 |
| chr2 | 63403950 | 63404050 | 1188-Lng-A-T | 37  | chr2:63403950-63404050 |
| chr2 | 63413150 | 63413250 | 1152-Lng-A-T | 42  | chr2:63413150-63413250 |
| chr2 | 63590650 | 63590750 | 1167-Lng-A-T | 51  | chr2:63590650-63590750 |
| chr2 | 63627650 | 63627750 | 1065-Lng-A-T | 205 | chr2:63627650-63627750 |
| chr2 | 63863650 | 63863750 | 1090-Lng-B-T | 165 | chr2:63863650-63863750 |
| chr2 | 63878650 | 63878750 | 1223-Lng-D-T | 45  | chr2:63878650-63878750 |
| chr2 | 63917750 | 63917850 | 1152-Lng-A-T | 71  | chr2:63917750-63917850 |
| chr2 | 64053650 | 64053750 | 1065-Lng-B-T | 62  | chr2:64053650-64053750 |
| chr2 | 64179050 | 64179150 | 1188-Lng-A-T | 48  | chr2:64179050-64179150 |
| chr2 | 64435350 | 64435450 | 1090-Lng-A-T | 75  | chr2:64435350-64435450 |
| chr2 | 64729350 | 64729450 | 1274-Lng-A-T | 69  | chr2:64729350-64729450 |
| chr2 | 64744150 | 64744250 | 1223-Lng-B-T | 224 | chr2:64744150-64744250 |
| chr2 | 64747850 | 64747950 | 1188-Lng-A-T | 46  | chr2:64747850-64747950 |
| chr2 | 64796850 | 64796950 | 901-Lng-A-T  | 111 | chr2:64796850-64796950 |
| chr2 | 64797350 | 64797450 | 846-Lng-A-T  | 89  | chr2:64797350-64797450 |
| chr2 | 64802350 | 64802450 | 1223-Lng-D-T | 45  | chr2:64802350-64802450 |
| chr2 | 64817350 | 64817450 | 846-Lng-A-T  | 101 | chr2:64817350-64817450 |
| chr2 | 64818550 | 64818650 | 901-Lng-D-T  | 335 | chr2:64818550-64818650 |
| chr2 | 64838450 | 64838550 | 901-Lng-A-T  | 107 | chr2:64838450-64838550 |
| chr2 | 64844150 | 64844250 | 846-Lng-A-T  | 239 | chr2:64844150-64844250 |
| chr2 | 64855850 | 64855950 | 1151-Lng-A-T | 69  | chr2:64855850-64855950 |
| chr2 | 64873250 | 64873350 | 1223-Lng-A-T | 199 | chr2:64873250-64873350 |
| chr2 | 64882750 | 64882850 | 901-Lng-A-T  | 379 | chr2:64882750-64882850 |
| chr2 | 64977950 | 64978050 | 1100-Lng-A-T | 106 | chr2:64977950-64978050 |
| chr2 | 64978150 | 64978250 | 1151-Lng-A-T | 98  | chr2:64978150-64978250 |

**Table S2: SB Insertion regions**

|      |          |          |              |      |                        |
|------|----------|----------|--------------|------|------------------------|
| chr2 | 64981250 | 64981350 | 1072-Lng-A-T | 175  | chr2:64981250-64981350 |
| chr2 | 65029150 | 65029250 | 1090-Lng-B-T | 257  | chr2:65029150-65029250 |
| chr2 | 65046850 | 65046950 | 901-Lng-B-T  | 49   | chr2:65046850-65046950 |
| chr2 | 65048250 | 65048350 | 1065-Lng-B-T | 47   | chr2:65048250-65048350 |
| chr2 | 65048550 | 65048650 | 1274-Lng-A-T | 66   | chr2:65048550-65048650 |
| chr2 | 65052950 | 65053050 | 1274-Lng-A-T | 176  | chr2:65052950-65053050 |
| chr2 | 65064550 | 65064650 | 1274-Lng-A-T | 72   | chr2:65064550-65064650 |
| chr2 | 65066850 | 65066950 | 1065-Lng-C-T | 169  | chr2:65066850-65066950 |
| chr2 | 65075250 | 65075350 | 1065-Lng-C-T | 93   | chr2:65075250-65075350 |
| chr2 | 65231850 | 65231950 | 1151-Lng-A-T | 425  | chr2:65231850-65231950 |
| chr2 | 65250850 | 65250950 | 1072-Lng-A-T | 143  | chr2:65250850-65250950 |
| chr2 | 65377150 | 65377250 | 1188-Lng-A-T | 40   | chr2:65377150-65377250 |
| chr2 | 65494350 | 65494450 | 1188-Lng-A-T | 38   | chr2:65494350-65494450 |
| chr2 | 65516350 | 65516450 | 1065-Lng-B-T | 60   | chr2:65516350-65516450 |
| chr2 | 65715550 | 65715650 | 1100-Lng-A-T | 142  | chr2:65715550-65715650 |
| chr2 | 65730250 | 65730350 | 1223-Lng-C-T | 43   | chr2:65730250-65730350 |
| chr2 | 65776550 | 65776650 | 1065-Lng-C-T | 219  | chr2:65776550-65776650 |
| chr2 | 65860550 | 65860650 | 901-Lng-C-T  | 79   | chr2:65860550-65860650 |
| chr2 | 66725850 | 66725950 | 1004-Lng-A-T | 67   | chr2:66725850-66725950 |
| chr2 | 66983650 | 66983750 | 1151-Lng-A-T | 56   | chr2:66983650-66983750 |
| chr2 | 66989850 | 66989950 | 901-Lng-A-T  | 99   | chr2:66989850-66989950 |
| chr2 | 67139050 | 67139150 | 1100-Lng-A-T | 79   | chr2:67139050-67139150 |
| chr2 | 67295450 | 67295550 | 901-Lng-B-T  | 134  | chr2:67295450-67295550 |
| chr2 | 67446450 | 67446550 | 901-Lng-C-T  | 36   | chr2:67446450-67446550 |
| chr2 | 67734450 | 67734550 | 1274-Lng-A-T | 53   | chr2:67734450-67734550 |
| chr2 | 67787050 | 67787150 | 1090-Lng-A-T | 66   | chr2:67787050-67787150 |
| chr2 | 67935550 | 67935650 | 1223-Lng-B-T | 61   | chr2:67935550-67935650 |
| chr2 | 68125050 | 68125150 | 1167-Lng-A-T | 1741 | chr2:68125050-68125150 |
| chr2 | 68132350 | 68132450 | 1100-Lng-B-T | 62   | chr2:68132350-68132450 |
| chr2 | 68249650 | 68249750 | 901-Lng-D-T  | 300  | chr2:68249650-68249750 |
| chr2 | 68272350 | 68272450 | 901-Lng-A-T  | 94   | chr2:68272350-68272450 |
| chr2 | 68277650 | 68277750 | 1223-Lng-C-T | 523  | chr2:68277650-68277750 |
| chr2 | 68293650 | 68293750 | 846-Lng-A-T  | 120  | chr2:68293650-68293750 |
| chr2 | 68319450 | 68319550 | 901-Lng-D-T  | 63   | chr2:68319450-68319550 |
| chr2 | 68483750 | 68483850 | 1274-Lng-A-T | 122  | chr2:68483750-68483850 |
| chr2 | 68615050 | 68615150 | 901-Lng-C-T  | 65   | chr2:68615050-68615150 |
| chr2 | 68671950 | 68672050 | 901-Lng-D-T  | 345  | chr2:68671950-68672050 |
| chr2 | 68703750 | 68703850 | 1065-Lng-C-T | 76   | chr2:68703750-68703850 |
| chr2 | 68883550 | 68883650 | 1167-Lng-A-T | 259  | chr2:68883550-68883650 |
| chr2 | 68956150 | 68956250 | 901-Lng-C-T  | 93   | chr2:68956150-68956250 |
| chr2 | 69187950 | 69188050 | 1072-Lng-A-T | 111  | chr2:69187950-69188050 |
| chr2 | 69248050 | 69248150 | 901-Lng-D-T  | 387  | chr2:69248050-69248150 |
| chr2 | 69287350 | 69287450 | 901-Lng-A-T  | 74   | chr2:69287350-69287450 |
| chr2 | 69314450 | 69314550 | 1188-Lng-A-T | 36   | chr2:69314450-69314550 |
| chr2 | 69335050 | 69335150 | 1004-Lng-A-T | 77   | chr2:69335050-69335150 |
| chr2 | 69365350 | 69365450 | 1188-Lng-A-T | 145  | chr2:69365350-69365450 |

**Table S2: SB Insertion regions**

|      |          |          |              |     |                        |
|------|----------|----------|--------------|-----|------------------------|
| chr2 | 69381450 | 69381550 | 1274-Lng-A-T | 78  | chr2:69381450-69381550 |
| chr2 | 69414850 | 69414950 | 1065-Lng-B-T | 65  | chr2:69414850-69414950 |
| chr2 | 69591250 | 69591350 | 846-Lng-A-T  | 198 | chr2:69591250-69591350 |
| chr2 | 69711050 | 69711150 | 1274-Lng-A-T | 194 | chr2:69711050-69711150 |
| chr2 | 69748450 | 69748550 | 901-Lng-A-T  | 104 | chr2:69748450-69748550 |
| chr2 | 69771950 | 69772050 | 1167-Lng-A-T | 46  | chr2:69771950-69772050 |
| chr2 | 69783050 | 69783150 | 1223-Lng-C-T | 44  | chr2:69783050-69783150 |
| chr2 | 69796450 | 69796550 | 1188-Lng-A-T | 85  | chr2:69796450-69796550 |
| chr2 | 69834150 | 69834250 | 846-Lng-A-T  | 252 | chr2:69834150-69834250 |
| chr2 | 69855450 | 69855550 | 1188-Lng-A-T | 88  | chr2:69855450-69855550 |
| chr2 | 69857650 | 69857750 | 1090-Lng-A-T | 609 | chr2:69857650-69857750 |
| chr2 | 69860650 | 69860750 | 1223-Lng-A-T | 66  | chr2:69860650-69860750 |
| chr2 | 69921150 | 69921250 | 1100-Lng-A-T | 92  | chr2:69921150-69921250 |
| chr2 | 70044750 | 70044850 | 1167-Lng-A-T | 45  | chr2:70044750-70044850 |
| chr2 | 70097350 | 70097450 | 1167-Lng-A-T | 73  | chr2:70097350-70097450 |
| chr2 | 70240350 | 70240450 | 901-Lng-A-T  | 430 | chr2:70240350-70240450 |
| chr2 | 70302050 | 70302150 | 1188-Lng-A-T | 64  | chr2:70302050-70302150 |
| chr2 | 70328050 | 70328150 | 1188-Lng-A-T | 51  | chr2:70328050-70328150 |
| chr2 | 70328850 | 70328950 | 1065-Lng-B-T | 56  | chr2:70328850-70328950 |
| chr2 | 70425150 | 70425250 | 1065-Lng-C-T | 74  | chr2:70425150-70425250 |
| chr2 | 70468250 | 70468350 | 1090-Lng-A-T | 62  | chr2:70468250-70468350 |
| chr2 | 70505750 | 70505850 | 1223-Lng-D-T | 41  | chr2:70505750-70505850 |
| chr2 | 70524050 | 70524150 | 901-Lng-B-T  | 76  | chr2:70524050-70524150 |
| chr2 | 70557950 | 70558050 | 1223-Lng-B-T | 36  | chr2:70557950-70558050 |
| chr2 | 70565250 | 70565350 | 1223-Lng-B-T | 45  | chr2:70565250-70565350 |
| chr2 | 70600350 | 70600450 | 1274-Lng-A-T | 97  | chr2:70600350-70600450 |
| chr2 | 70662550 | 70662650 | 1065-Lng-A-T | 116 | chr2:70662550-70662650 |
| chr2 | 70784050 | 70784150 | 901-Lng-C-T  | 198 | chr2:70784050-70784150 |
| chr2 | 70826850 | 70826950 | 901-Lng-A-T  | 362 | chr2:70826850-70826950 |
| chr2 | 70883950 | 70884050 | 1223-Lng-D-T | 40  | chr2:70883950-70884050 |
| chr2 | 70913050 | 70913150 | 1167-Lng-A-T | 103 | chr2:70913050-70913150 |
| chr2 | 70918550 | 70918650 | 901-Lng-C-T  | 56  | chr2:70918550-70918650 |
| chr2 | 70985750 | 70985850 | 1274-Lng-A-T | 103 | chr2:70985750-70985850 |
| chr2 | 70992950 | 70993050 | 1065-Lng-A-T | 80  | chr2:70992950-70993050 |
| chr2 | 71072150 | 71072250 | 1188-Lng-A-T | 42  | chr2:71072150-71072250 |
| chr2 | 71099350 | 71099450 | 1065-Lng-B-T | 58  | chr2:71099350-71099450 |
| chr2 | 71114650 | 71114750 | 1065-Lng-B-T | 121 | chr2:71114650-71114750 |
| chr2 | 71121550 | 71121650 | 901-Lng-A-T  | 50  | chr2:71121550-71121650 |
| chr2 | 71168650 | 71168750 | 901-Lng-A-T  | 94  | chr2:71168650-71168750 |
| chr2 | 71266550 | 71266650 | 1223-Lng-D-T | 63  | chr2:71266550-71266650 |
| chr2 | 71401050 | 71401150 | 901-Lng-B-T  | 167 | chr2:71401050-71401150 |
| chr2 | 71573350 | 71573450 | 1167-Lng-A-T | 96  | chr2:71573350-71573450 |
| chr2 | 71580450 | 71580550 | 846-Lng-A-T  | 74  | chr2:71580450-71580550 |
| chr2 | 71598650 | 71598750 | 1090-Lng-A-T | 53  | chr2:71598650-71598750 |
| chr2 | 71659550 | 71659650 | 1223-Lng-A-T | 189 | chr2:71659550-71659650 |
| chr2 | 72139150 | 72139250 | 1090-Lng-A-T | 93  | chr2:72139150-72139250 |

**Table S2: SB Insertion regions**

|      |          |          |              |      |                        |
|------|----------|----------|--------------|------|------------------------|
| chr2 | 72201850 | 72201950 | 1152-Lng-A-T | 64   | chr2:72201850-72201950 |
| chr2 | 72242250 | 72242350 | 901-Lng-C-T  | 47   | chr2:72242250-72242350 |
| chr2 | 72260850 | 72260950 | 1223-Lng-C-T | 46   | chr2:72260850-72260950 |
| chr2 | 72273050 | 72273150 | 901-Lng-C-T  | 65   | chr2:72273050-72273150 |
| chr2 | 72411150 | 72411250 | 1065-Lng-B-T | 266  | chr2:72411150-72411250 |
| chr2 | 72689550 | 72689650 | 901-Lng-B-T  | 83   | chr2:72689550-72689650 |
| chr2 | 72793050 | 72793150 | 1167-Lng-A-T | 1120 | chr2:72793050-72793150 |
| chr2 | 72802450 | 72802550 | 1151-Lng-A-T | 73   | chr2:72802450-72802550 |
| chr2 | 72881450 | 72881550 | 1151-Lng-A-T | 68   | chr2:72881450-72881550 |
| chr2 | 72938350 | 72938450 | 1151-Lng-A-T | 63   | chr2:72938350-72938450 |
| chr2 | 72998250 | 72998350 | 901-Lng-A-T  | 70   | chr2:72998250-72998350 |
| chr2 | 73077650 | 73077750 | 901-Lng-A-T  | 52   | chr2:73077650-73077750 |
| chr2 | 73171650 | 73171750 | 1167-Lng-A-T | 69   | chr2:73171650-73171750 |
| chr2 | 73301450 | 73301550 | 1223-Lng-C-T | 69   | chr2:73301450-73301550 |
| chr2 | 73353550 | 73353650 | 846-Lng-A-T  | 104  | chr2:73353550-73353650 |
| chr2 | 73369150 | 73369250 | 1152-Lng-A-T | 44   | chr2:73369150-73369250 |
| chr2 | 73390250 | 73390350 | 1065-Lng-C-T | 96   | chr2:73390250-73390350 |
| chr2 | 73409250 | 73409350 | 1223-Lng-A-T | 158  | chr2:73409250-73409350 |
| chr2 | 73527650 | 73527750 | 901-Lng-B-T  | 49   | chr2:73527650-73527750 |
| chr2 | 73669550 | 73669650 | 1223-Lng-B-T | 150  | chr2:73669550-73669650 |
| chr2 | 73671150 | 73671250 | 1065-Lng-A-T | 80   | chr2:73671150-73671250 |
| chr2 | 73700150 | 73700250 | 1100-Lng-B-T | 54   | chr2:73700150-73700250 |
| chr2 | 73700250 | 73700350 | 1188-Lng-A-T | 43   | chr2:73700250-73700350 |
| chr2 | 73729150 | 73729250 | 1223-Lng-C-T | 48   | chr2:73729150-73729250 |
| chr2 | 73745950 | 73746050 | 1188-Lng-A-T | 61   | chr2:73745950-73746050 |
| chr2 | 73746550 | 73746650 | 1100-Lng-B-T | 51   | chr2:73746550-73746650 |
| chr2 | 74257050 | 74257150 | 901-Lng-D-T  | 231  | chr2:74257050-74257150 |
| chr2 | 74352150 | 74352250 | 901-Lng-C-T  | 31   | chr2:74352150-74352250 |
| chr2 | 74615550 | 74615650 | 901-Lng-B-T  | 107  | chr2:74615550-74615650 |
| chr2 | 74684050 | 74684150 | 1274-Lng-A-T | 126  | chr2:74684050-74684150 |
| chr2 | 74696850 | 74696950 | 1090-Lng-A-T | 62   | chr2:74696850-74696950 |
| chr2 | 75120450 | 75120550 | 1090-Lng-A-T | 53   | chr2:75120450-75120550 |
| chr2 | 75324150 | 75324250 | 1065-Lng-C-T | 68   | chr2:75324150-75324250 |
| chr2 | 75517550 | 75517650 | 1152-Lng-A-T | 99   | chr2:75517550-75517650 |
| chr2 | 75537250 | 75537350 | 1223-Lng-C-T | 45   | chr2:75537250-75537350 |
| chr2 | 75694250 | 75694350 | 1065-Lng-B-T | 94   | chr2:75694250-75694350 |
| chr2 | 75695650 | 75695750 | 901-Lng-D-T  | 249  | chr2:75695650-75695750 |
| chr2 | 75713350 | 75713450 | 1167-Lng-A-T | 123  | chr2:75713350-75713450 |
| chr2 | 75718750 | 75718850 | 1090-Lng-A-T | 59   | chr2:75718750-75718850 |
| chr2 | 75767050 | 75767150 | 1065-Lng-B-T | 64   | chr2:75767050-75767150 |
| chr2 | 76014950 | 76015050 | 901-Lng-A-T  | 466  | chr2:76014950-76015050 |
| chr2 | 76143750 | 76143850 | 901-Lng-B-T  | 206  | chr2:76143750-76143850 |
| chr2 | 76213950 | 76214050 | 901-Lng-A-T  | 120  | chr2:76213950-76214050 |
| chr2 | 76268750 | 76268850 | 1223-Lng-C-T | 45   | chr2:76268750-76268850 |
| chr2 | 76275650 | 76275750 | 1274-Lng-A-T | 64   | chr2:76275650-76275750 |
| chr2 | 76313350 | 76313450 | 1167-Lng-A-T | 57   | chr2:76313350-76313450 |



**Table S2: SB Insertion regions**

|      |          |          |              |     |                        |
|------|----------|----------|--------------|-----|------------------------|
| chr2 | 76335850 | 76335950 | 1100-Lng-B-T | 312 | chr2:76335850-76335950 |
| chr2 | 76353750 | 76353850 | 1274-Lng-A-T | 103 | chr2:76353750-76353850 |
| chr2 | 76398050 | 76398150 | 1065-Lng-B-T | 46  | chr2:76398050-76398150 |
| chr2 | 76509950 | 76510050 | 1100-Lng-B-T | 61  | chr2:76509950-76510050 |
| chr2 | 76746350 | 76746450 | 1065-Lng-A-T | 89  | chr2:76746350-76746450 |
| chr2 | 76870150 | 76870250 | 1223-Lng-B-T | 34  | chr2:76870150-76870250 |
| chr2 | 76961550 | 76961650 | 1167-Lng-A-T | 60  | chr2:76961550-76961650 |
| chr2 | 76967550 | 76967650 | 1274-Lng-A-T | 50  | chr2:76967550-76967650 |
| chr2 | 76977050 | 76977150 | 901-Lng-D-T  | 355 | chr2:76977050-76977150 |
| chr2 | 77096050 | 77096150 | 1072-Lng-A-T | 49  | chr2:77096050-77096150 |
| chr2 | 77259650 | 77259750 | 1100-Lng-A-T | 75  | chr2:77259650-77259750 |
| chr2 | 77283350 | 77283450 | 1065-Lng-C-T | 84  | chr2:77283350-77283450 |
| chr2 | 77333950 | 77334050 | 1100-Lng-B-T | 55  | chr2:77333950-77334050 |
| chr2 | 77370350 | 77370450 | 1274-Lng-A-T | 157 | chr2:77370350-77370450 |
| chr2 | 77432950 | 77433050 | 846-Lng-A-T  | 87  | chr2:77432950-77433050 |
| chr2 | 77739650 | 77739750 | 901-Lng-A-T  | 60  | chr2:77739650-77739750 |
| chr2 | 77745450 | 77745550 | 1223-Lng-C-T | 93  | chr2:77745450-77745550 |
| chr2 | 77761350 | 77761450 | 901-Lng-B-T  | 41  | chr2:77761350-77761450 |
| chr2 | 77762950 | 77763050 | 1072-Lng-A-T | 111 | chr2:77762950-77763050 |
| chr2 | 77775250 | 77775350 | 1065-Lng-B-T | 45  | chr2:77775250-77775350 |
| chr2 | 77780150 | 77780250 | 1072-Lng-A-T | 129 | chr2:77780150-77780250 |
| chr2 | 77783350 | 77783450 | 1167-Lng-A-T | 78  | chr2:77783350-77783450 |
| chr2 | 77784650 | 77784750 | 1223-Lng-C-T | 321 | chr2:77784650-77784750 |
| chr2 | 78086950 | 78087050 | 1100-Lng-B-T | 74  | chr2:78086950-78087050 |
| chr2 | 78109750 | 78109850 | 901-Lng-A-T  | 60  | chr2:78109750-78109850 |
| chr2 | 78136950 | 78137050 | 1152-Lng-A-T | 53  | chr2:78136950-78137050 |
| chr2 | 78162550 | 78162650 | 901-Lng-C-T  | 87  | chr2:78162550-78162650 |
| chr2 | 78294450 | 78294550 | 901-Lng-C-T  | 30  | chr2:78294450-78294550 |
| chr2 | 78312350 | 78312450 | 901-Lng-C-T  | 830 | chr2:78312350-78312450 |
| chr2 | 78762350 | 78762450 | 1223-Lng-A-T | 83  | chr2:78762350-78762450 |
| chr2 | 78764250 | 78764350 | 1065-Lng-B-T | 85  | chr2:78764250-78764350 |
| chr2 | 78781150 | 78781250 | 1065-Lng-B-T | 81  | chr2:78781150-78781250 |
| chr2 | 78834250 | 78834350 | 1223-Lng-D-T | 49  | chr2:78834250-78834350 |
| chr2 | 78883050 | 78883150 | 1274-Lng-A-T | 174 | chr2:78883050-78883150 |
| chr2 | 78979950 | 78980050 | 901-Lng-A-T  | 52  | chr2:78979950-78980050 |
| chr2 | 79019250 | 79019350 | 1004-Lng-A-T | 101 | chr2:79019250-79019350 |
| chr2 | 79353650 | 79353750 | 1223-Lng-B-T | 129 | chr2:79353650-79353750 |
| chr2 | 79434650 | 79434750 | 901-Lng-C-T  | 312 | chr2:79434650-79434750 |
| chr2 | 79482450 | 79482550 | 1223-Lng-D-T | 72  | chr2:79482450-79482550 |
| chr2 | 79628750 | 79628850 | 846-Lng-A-T  | 156 | chr2:79628750-79628850 |
| chr2 | 80045950 | 80046050 | 1100-Lng-B-T | 55  | chr2:80045950-80046050 |
| chr2 | 80059150 | 80059250 | 1065-Lng-A-T | 78  | chr2:80059150-80059250 |
| chr2 | 80153550 | 80153650 | 901-Lng-C-T  | 66  | chr2:80153550-80153650 |
| chr2 | 80165450 | 80165550 | 1072-Lng-A-T | 82  | chr2:80165450-80165550 |
| chr2 | 80282150 | 80282250 | 1188-Lng-A-T | 56  | chr2:80282150-80282250 |
| chr2 | 80348250 | 80348350 | 901-Lng-C-T  | 47  | chr2:80348250-80348350 |

**Table S2: SB Insertion regions**

|      |          |          |              |     |                        |
|------|----------|----------|--------------|-----|------------------------|
| chr2 | 80366850 | 80366950 | 1090-Lng-A-T | 347 | chr2:80366850-80366950 |
| chr2 | 80396650 | 80396750 | 1274-Lng-A-T | 193 | chr2:80396650-80396750 |
| chr2 | 80401950 | 80402050 | 1223-Lng-B-T | 203 | chr2:80401950-80402050 |
| chr2 | 80405350 | 80405450 | 1188-Lng-A-T | 82  | chr2:80405350-80405450 |
| chr2 | 80407950 | 80408050 | 901-Lng-C-T  | 69  | chr2:80407950-80408050 |
| chr2 | 80839350 | 80839450 | 1152-Lng-A-T | 73  | chr2:80839350-80839450 |
| chr2 | 80860450 | 80860550 | 1152-Lng-A-T | 120 | chr2:80860450-80860550 |
| chr2 | 80983750 | 80983850 | 1090-Lng-A-T | 67  | chr2:80983750-80983850 |
| chr2 | 81075050 | 81075150 | 1065-Lng-B-T | 53  | chr2:81075050-81075150 |
| chr2 | 81186150 | 81186250 | 1065-Lng-A-T | 102 | chr2:81186150-81186250 |
| chr2 | 81204150 | 81204250 | 1188-Lng-A-T | 92  | chr2:81204150-81204250 |
| chr2 | 81877850 | 81877950 | 1152-Lng-A-T | 103 | chr2:81877850-81877950 |
| chr2 | 82033350 | 82033450 | 1152-Lng-A-T | 100 | chr2:82033350-82033450 |
| chr2 | 82054050 | 82054150 | 1065-Lng-A-T | 89  | chr2:82054050-82054150 |
| chr2 | 82058350 | 82058450 | 1100-Lng-B-T | 51  | chr2:82058350-82058450 |
| chr2 | 82127250 | 82127350 | 1100-Lng-B-T | 50  | chr2:82127250-82127350 |
| chr2 | 82271950 | 82272050 | 1274-Lng-A-T | 71  | chr2:82271950-82272050 |
| chr2 | 82425050 | 82425150 | 1223-Lng-C-T | 78  | chr2:82425050-82425150 |
| chr2 | 82642250 | 82642350 | 901-Lng-A-T  | 65  | chr2:82642250-82642350 |
| chr2 | 83195050 | 83195150 | 901-Lng-A-T  | 70  | chr2:83195050-83195150 |
| chr2 | 83322550 | 83322650 | 1223-Lng-D-T | 50  | chr2:83322550-83322650 |
| chr2 | 83490250 | 83490350 | 846-Lng-A-T  | 145 | chr2:83490250-83490350 |
| chr2 | 83669550 | 83669650 | 1152-Lng-A-T | 49  | chr2:83669550-83669650 |
| chr2 | 83775650 | 83775750 | 901-Lng-D-T  | 38  | chr2:83775650-83775750 |
| chr2 | 84462350 | 84462450 | 1090-Lng-B-T | 741 | chr2:84462350-84462450 |
| chr2 | 84483350 | 84483450 | 1223-Lng-A-T | 158 | chr2:84483350-84483450 |
| chr2 | 84486150 | 84486250 | 901-Lng-A-T  | 87  | chr2:84486150-84486250 |
| chr2 | 84540750 | 84540850 | 1223-Lng-B-T | 317 | chr2:84540750-84540850 |
| chr2 | 84547950 | 84548050 | 901-Lng-C-T  | 38  | chr2:84547950-84548050 |
| chr2 | 84628450 | 84628550 | 1274-Lng-A-T | 51  | chr2:84628450-84628550 |
| chr2 | 84870450 | 84870550 | 901-Lng-C-T  | 73  | chr2:84870450-84870550 |
| chr2 | 85017050 | 85017150 | 901-Lng-A-T  | 144 | chr2:85017050-85017150 |
| chr2 | 85155450 | 85155550 | 901-Lng-D-T  | 133 | chr2:85155450-85155550 |
| chr2 | 85218050 | 85218150 | 1065-Lng-A-T | 44  | chr2:85218050-85218150 |
| chr2 | 85489050 | 85489150 | 1223-Lng-B-T | 39  | chr2:85489050-85489150 |
| chr2 | 86379650 | 86379750 | 901-Lng-B-T  | 209 | chr2:86379650-86379750 |
| chr2 | 86393150 | 86393250 | 1223-Lng-C-T | 44  | chr2:86393150-86393250 |
| chr2 | 86502950 | 86503050 | 1004-Lng-A-T | 57  | chr2:86502950-86503050 |
| chr2 | 86529650 | 86529750 | 901-Lng-B-T  | 90  | chr2:86529650-86529750 |
| chr2 | 86531750 | 86531850 | 901-Lng-B-T  | 125 | chr2:86531750-86531850 |
| chr2 | 86578450 | 86578550 | 1065-Lng-B-T | 239 | chr2:86578450-86578550 |
| chr2 | 86592450 | 86592550 | 1004-Lng-A-T | 384 | chr2:86592450-86592550 |
| chr2 | 86618850 | 86618950 | 1072-Lng-A-T | 54  | chr2:86618850-86618950 |
| chr2 | 86762450 | 86762550 | 901-Lng-D-T  | 309 | chr2:86762450-86762550 |
| chr2 | 86823150 | 86823250 | 1004-Lng-A-T | 79  | chr2:86823150-86823250 |
| chr2 | 86861650 | 86861750 | 1065-Lng-A-T | 64  | chr2:86861650-86861750 |

**Table S2: SB Insertion regions**

|      |          |          |              |     |                        |
|------|----------|----------|--------------|-----|------------------------|
| chr2 | 86979850 | 86979950 | 1188-Lng-A-T | 112 | chr2:86979850-86979950 |
| chr2 | 87044950 | 87045050 | 1100-Lng-A-T | 94  | chr2:87044950-87045050 |
| chr2 | 87285650 | 87285750 | 901-Lng-D-T  | 295 | chr2:87285650-87285750 |
| chr2 | 87441550 | 87441650 | 1152-Lng-A-T | 37  | chr2:87441550-87441650 |
| chr2 | 87446550 | 87446650 | 1152-Lng-A-T | 55  | chr2:87446550-87446650 |
| chr2 | 87837250 | 87837350 | 1274-Lng-A-T | 141 | chr2:87837250-87837350 |
| chr2 | 87850650 | 87850750 | 1100-Lng-A-T | 68  | chr2:87850650-87850750 |
| chr2 | 87874950 | 87875050 | 901-Lng-D-T  | 273 | chr2:87874950-87875050 |
| chr2 | 88075150 | 88075250 | 1152-Lng-A-T | 193 | chr2:88075150-88075250 |
| chr2 | 88160150 | 88160250 | 846-Lng-A-T  | 50  | chr2:88160150-88160250 |
| chr2 | 88464450 | 88464550 | 901-Lng-C-T  | 214 | chr2:88464450-88464550 |
| chr2 | 88588550 | 88588650 | 1152-Lng-A-T | 52  | chr2:88588550-88588650 |
| chr2 | 88931150 | 88931250 | 901-Lng-B-T  | 335 | chr2:88931150-88931250 |
| chr2 | 89013250 | 89013350 | 1188-Lng-A-T | 44  | chr2:89013250-89013350 |
| chr2 | 89295350 | 89295450 | 1065-Lng-C-T | 634 | chr2:89295350-89295450 |
| chr2 | 89350550 | 89350650 | 1151-Lng-A-T | 65  | chr2:89350550-89350650 |
| chr2 | 89500750 | 89500850 | 901-Lng-A-T  | 58  | chr2:89500750-89500850 |
| chr2 | 89872050 | 89872150 | 1274-Lng-A-T | 143 | chr2:89872050-89872150 |
| chr2 | 90382550 | 90382650 | 901-Lng-C-T  | 299 | chr2:90382550-90382650 |
| chr2 | 90437450 | 90437550 | 901-Lng-B-T  | 152 | chr2:90437450-90437550 |
| chr2 | 90699650 | 90699750 | 901-Lng-B-T  | 59  | chr2:90699650-90699750 |
| chr2 | 90715350 | 90715450 | 1188-Lng-A-T | 34  | chr2:90715350-90715450 |
| chr2 | 90792750 | 90792850 | 1004-Lng-A-T | 57  | chr2:90792750-90792850 |
| chr2 | 90815050 | 90815150 | 1072-Lng-A-T | 100 | chr2:90815050-90815150 |
| chr2 | 90818150 | 90818250 | 1004-Lng-A-T | 76  | chr2:90818150-90818250 |
| chr2 | 90822250 | 90822350 | 1223-Lng-D-T | 215 | chr2:90822250-90822350 |
| chr2 | 90826650 | 90826750 | 1100-Lng-A-T | 72  | chr2:90826650-90826750 |
| chr2 | 90966150 | 90966250 | 901-Lng-C-T  | 69  | chr2:90966150-90966250 |
| chr2 | 91017350 | 91017450 | 1065-Lng-A-T | 95  | chr2:91017350-91017450 |
| chr2 | 91029850 | 91029950 | 1274-Lng-A-T | 50  | chr2:91029850-91029950 |
| chr2 | 91058650 | 91058750 | 901-Lng-A-T  | 153 | chr2:91058650-91058750 |
| chr2 | 91215550 | 91215650 | 1065-Lng-B-T | 45  | chr2:91215550-91215650 |
| chr2 | 91358650 | 91358750 | 1167-Lng-A-T | 100 | chr2:91358650-91358750 |
| chr2 | 91463950 | 91464050 | 1223-Lng-D-T | 64  | chr2:91463950-91464050 |
| chr2 | 91537350 | 91537450 | 1100-Lng-A-T | 53  | chr2:91537350-91537450 |
| chr2 | 91578250 | 91578350 | 846-Lng-A-T  | 111 | chr2:91578250-91578350 |
| chr2 | 91581150 | 91581250 | 1065-Lng-C-T | 138 | chr2:91581150-91581250 |
| chr2 | 91605650 | 91605750 | 1100-Lng-A-T | 157 | chr2:91605650-91605750 |
| chr2 | 91617750 | 91617850 | 1004-Lng-A-T | 62  | chr2:91617750-91617850 |
| chr2 | 91617850 | 91617950 | 1223-Lng-C-T | 107 | chr2:91617850-91617950 |
| chr2 | 91657150 | 91657250 | 1223-Lng-C-T | 53  | chr2:91657150-91657250 |
| chr2 | 91663650 | 91663750 | 1223-Lng-A-T | 174 | chr2:91663650-91663750 |
| chr2 | 91690050 | 91690150 | 1151-Lng-A-T | 143 | chr2:91690050-91690150 |
| chr2 | 91732850 | 91732950 | 1223-Lng-C-T | 92  | chr2:91732850-91732950 |
| chr2 | 91747250 | 91747350 | 1223-Lng-C-T | 47  | chr2:91747250-91747350 |
| chr2 | 91755350 | 91755450 | 1004-Lng-A-T | 93  | chr2:91755350-91755450 |

**Table S2: SB Insertion regions**

|      |          |          |              |     |                        |
|------|----------|----------|--------------|-----|------------------------|
| chr2 | 91842850 | 91842950 | 1004-Lng-A-T | 246 | chr2:91842850-91842950 |
| chr2 | 91867550 | 91867650 | 1004-Lng-A-T | 183 | chr2:91867550-91867650 |
| chr2 | 92028150 | 92028250 | 1065-Lng-A-T | 985 | chr2:92028150-92028250 |
| chr2 | 92051050 | 92051150 | 1065-Lng-B-T | 52  | chr2:92051050-92051150 |
| chr2 | 92051950 | 92052050 | 1100-Lng-A-T | 148 | chr2:92051950-92052050 |
| chr2 | 92074150 | 92074250 | 1090-Lng-A-T | 86  | chr2:92074150-92074250 |
| chr2 | 92090950 | 92091050 | 1274-Lng-A-T | 58  | chr2:92090950-92091050 |
| chr2 | 92104050 | 92104150 | 1152-Lng-A-T | 66  | chr2:92104050-92104150 |
| chr2 | 92119950 | 92120050 | 1274-Lng-A-T | 145 | chr2:92119950-92120050 |
| chr2 | 92141050 | 92141150 | 1167-Lng-A-T | 185 | chr2:92141050-92141150 |
| chr2 | 92145550 | 92145650 | 901-Lng-D-T  | 208 | chr2:92145550-92145650 |
| chr2 | 92201850 | 92201950 | 1223-Lng-D-T | 40  | chr2:92201850-92201950 |
| chr2 | 92422950 | 92423050 | 1065-Lng-A-T | 86  | chr2:92422950-92423050 |
| chr2 | 92556350 | 92556450 | 1152-Lng-A-T | 102 | chr2:92556350-92556450 |
| chr2 | 92632150 | 92632250 | 901-Lng-B-T  | 102 | chr2:92632150-92632250 |
| chr2 | 92761650 | 92761750 | 901-Lng-A-T  | 117 | chr2:92761650-92761750 |
| chr2 | 93279750 | 93279850 | 1188-Lng-A-T | 123 | chr2:93279750-93279850 |
| chr2 | 93296250 | 93296350 | 1274-Lng-A-T | 53  | chr2:93296250-93296350 |
| chr2 | 93332650 | 93332750 | 1065-Lng-B-T | 65  | chr2:93332650-93332750 |
| chr2 | 93384050 | 93384150 | 1274-Lng-A-T | 135 | chr2:93384050-93384150 |
| chr2 | 93631550 | 93631650 | 901-Lng-A-T  | 77  | chr2:93631550-93631650 |
| chr2 | 93659350 | 93659450 | 1090-Lng-B-T | 78  | chr2:93659350-93659450 |
| chr2 | 93953050 | 93953150 | 1090-Lng-A-T | 93  | chr2:93953050-93953150 |
| chr2 | 94039450 | 94039550 | 1065-Lng-A-T | 47  | chr2:94039450-94039550 |
| chr2 | 94141150 | 94141250 | 846-Lng-A-T  | 82  | chr2:94141150-94141250 |
| chr2 | 94146950 | 94147050 | 1065-Lng-B-T | 53  | chr2:94146950-94147050 |
| chr2 | 94159850 | 94159950 | 1065-Lng-A-T | 46  | chr2:94159850-94159950 |
| chr2 | 94188150 | 94188250 | 1167-Lng-A-T | 150 | chr2:94188150-94188250 |
| chr2 | 94217850 | 94217950 | 1188-Lng-A-T | 34  | chr2:94217850-94217950 |
| chr2 | 94254250 | 94254350 | 1274-Lng-A-T | 78  | chr2:94254250-94254350 |
| chr2 | 94372750 | 94372850 | 1090-Lng-A-T | 93  | chr2:94372750-94372850 |
| chr2 | 94534650 | 94534750 | 1223-Lng-D-T | 46  | chr2:94534650-94534750 |
| chr2 | 94595150 | 94595250 | 1065-Lng-B-T | 70  | chr2:94595150-94595250 |
| chr2 | 94718650 | 94718750 | 901-Lng-C-T  | 125 | chr2:94718650-94718750 |
| chr2 | 94785150 | 94785250 | 901-Lng-D-T  | 53  | chr2:94785150-94785250 |
| chr2 | 94899850 | 94899950 | 1065-Lng-A-T | 40  | chr2:94899850-94899950 |
| chr2 | 95375250 | 95375350 | 1100-Lng-A-T | 65  | chr2:95375250-95375350 |
| chr2 | 95484450 | 95484550 | 901-Lng-B-T  | 165 | chr2:95484450-95484550 |
| chr2 | 95791150 | 95791250 | 1090-Lng-A-T | 51  | chr2:95791150-95791250 |
| chr2 | 96051750 | 96051850 | 1072-Lng-A-T | 86  | chr2:96051750-96051850 |
| chr2 | 96151850 | 96151950 | 901-Lng-A-T  | 120 | chr2:96151850-96151950 |
| chr2 | 96162850 | 96162950 | 1090-Lng-B-T | 656 | chr2:96162850-96162950 |
| chr2 | 96431150 | 96431250 | 1274-Lng-A-T | 221 | chr2:96431150-96431250 |
| chr2 | 96468350 | 96468450 | 1152-Lng-A-T | 109 | chr2:96468350-96468450 |
| chr2 | 96483250 | 96483350 | 901-Lng-A-T  | 522 | chr2:96483250-96483350 |
| chr2 | 96545850 | 96545950 | 901-Lng-A-T  | 79  | chr2:96545850-96545950 |

**Table S2: SB Insertion regions**

|      |          |          |              |     |                        |
|------|----------|----------|--------------|-----|------------------------|
| chr2 | 96634150 | 96634250 | 1100-Lng-A-T | 76  | chr2:96634150-96634250 |
| chr2 | 96635550 | 96635650 | 1090-Lng-A-T | 51  | chr2:96635550-96635650 |
| chr2 | 96685750 | 96685850 | 1090-Lng-B-T | 140 | chr2:96685750-96685850 |
| chr2 | 96879250 | 96879350 | 1188-Lng-A-T | 48  | chr2:96879250-96879350 |
| chr2 | 96882450 | 96882550 | 1188-Lng-A-T | 81  | chr2:96882450-96882550 |
| chr2 | 97360850 | 97360950 | 1065-Lng-A-T | 46  | chr2:97360850-97360950 |
| chr2 | 97687450 | 97687550 | 1065-Lng-B-T | 79  | chr2:97687450-97687550 |
| chr2 | 97714850 | 97714950 | 1090-Lng-B-T | 83  | chr2:97714850-97714950 |
| chr2 | 97787250 | 97787350 | 1004-Lng-A-T | 69  | chr2:97787250-97787350 |
| chr2 | 97845950 | 97846050 | 901-Lng-B-T  | 188 | chr2:97845950-97846050 |
| chr2 | 98502450 | 98502550 | 1065-Lng-B-T | 52  | chr2:98502450-98502550 |
| chr2 | 98502450 | 98502550 | 846-Lng-A-T  | 65  | chr2:98502450-98502550 |
| chr2 | 98502550 | 98502650 | 1152-Lng-A-T | 43  | chr2:98502550-98502650 |
| chr2 | 98502650 | 98502750 | 1004-Lng-A-T | 68  | chr2:98502650-98502750 |
| chr2 | 98502650 | 98502750 | 1223-Lng-A-T | 154 | chr2:98502650-98502750 |
| chr2 | 98502650 | 98502750 | 901-Lng-B-T  | 155 | chr2:98502650-98502750 |
| chr2 | 98502650 | 98502750 | 1223-Lng-C-T | 87  | chr2:98502650-98502750 |
| chr2 | 98502650 | 98502750 | 1065-Lng-A-T | 173 | chr2:98502650-98502750 |
| chr2 | 98502650 | 98502750 | 1065-Lng-B-T | 71  | chr2:98502650-98502750 |
| chr2 | 98502650 | 98502750 | 1223-Lng-D-T | 53  | chr2:98502650-98502750 |
| chr2 | 98502650 | 98502750 | 901-Lng-D-T  | 320 | chr2:98502650-98502750 |
| chr2 | 98502650 | 98502750 | 1065-Lng-C-T | 243 | chr2:98502650-98502750 |
| chr2 | 98502650 | 98502750 | 846-Lng-A-T  | 95  | chr2:98502650-98502750 |
| chr2 | 98502650 | 98502750 | 1004-Lng-A-T | 86  | chr2:98502650-98502750 |
| chr2 | 98502650 | 98502750 | 901-Lng-C-T  | 203 | chr2:98502650-98502750 |
| chr2 | 98502650 | 98502750 | 1152-Lng-A-T | 289 | chr2:98502650-98502750 |
| chr2 | 98502650 | 98502750 | 1090-Lng-A-T | 85  | chr2:98502650-98502750 |
| chr2 | 98502650 | 98502750 | 1065-Lng-B-T | 148 | chr2:98502650-98502750 |
| chr2 | 98502650 | 98502750 | 1072-Lng-A-T | 110 | chr2:98502650-98502750 |
| chr2 | 98502650 | 98502750 | 1065-Lng-C-T | 120 | chr2:98502650-98502750 |
| chr2 | 98502650 | 98502750 | 1100-Lng-A-T | 170 | chr2:98502650-98502750 |
| chr2 | 98502750 | 98502850 | 901-Lng-C-T  | 138 | chr2:98502750-98502850 |
| chr2 | 98502750 | 98502850 | 1065-Lng-A-T | 38  | chr2:98502750-98502850 |
| chr2 | 98502750 | 98502850 | 901-Lng-A-T  | 248 | chr2:98502750-98502850 |
| chr2 | 98502750 | 98502850 | 1090-Lng-A-T | 166 | chr2:98502750-98502850 |
| chr2 | 98502750 | 98502850 | 1065-Lng-B-T | 46  | chr2:98502750-98502850 |
| chr2 | 98502750 | 98502850 | 1072-Lng-A-T | 147 | chr2:98502750-98502850 |
| chr2 | 98502750 | 98502850 | 1167-Lng-A-T | 45  | chr2:98502750-98502850 |
| chr2 | 98502750 | 98502850 | 901-Lng-B-T  | 116 | chr2:98502750-98502850 |
| chr2 | 98502750 | 98502850 | 1090-Lng-A-T | 64  | chr2:98502750-98502850 |
| chr2 | 98502750 | 98502850 | 1065-Lng-B-T | 294 | chr2:98502750-98502850 |
| chr2 | 98502750 | 98502850 | 1065-Lng-A-T | 57  | chr2:98502750-98502850 |
| chr2 | 98502750 | 98502850 | 901-Lng-A-T  | 74  | chr2:98502750-98502850 |
| chr2 | 98502750 | 98502850 | 901-Lng-D-T  | 396 | chr2:98502750-98502850 |
| chr2 | 98502750 | 98502850 | 1065-Lng-C-T | 150 | chr2:98502750-98502850 |
| chr2 | 98502750 | 98502850 | 1151-Lng-A-T | 95  | chr2:98502750-98502850 |

**Table S2: SB Insertion regions**

|      |          |          |              |     |                        |
|------|----------|----------|--------------|-----|------------------------|
| chr2 | 98502750 | 98502850 | 1004-Lng-A-T | 282 | chr2:98502750-98502850 |
| chr2 | 98502850 | 98502950 | 1090-Lng-A-T | 46  | chr2:98502850-98502950 |
| chr2 | 98502850 | 98502950 | 1065-Lng-B-T | 144 | chr2:98502850-98502950 |
| chr2 | 98502850 | 98502950 | 1072-Lng-A-T | 115 | chr2:98502850-98502950 |
| chr2 | 98502850 | 98502950 | 901-Lng-D-T  | 141 | chr2:98502850-98502950 |
| chr2 | 98502850 | 98502950 | 1065-Lng-C-T | 115 | chr2:98502850-98502950 |
| chr2 | 98502850 | 98502950 | 1100-Lng-A-T | 58  | chr2:98502850-98502950 |
| chr2 | 98502850 | 98502950 | 1004-Lng-A-T | 125 | chr2:98502850-98502950 |
| chr2 | 98502850 | 98502950 | 1065-Lng-A-T | 180 | chr2:98502850-98502950 |
| chr2 | 98502850 | 98502950 | 901-Lng-A-T  | 212 | chr2:98502850-98502950 |
| chr2 | 98502850 | 98502950 | 1072-Lng-A-T | 96  | chr2:98502850-98502950 |
| chr2 | 98502850 | 98502950 | 1065-Lng-C-T | 147 | chr2:98502850-98502950 |
| chr2 | 98502850 | 98502950 | 846-Lng-A-T  | 367 | chr2:98502850-98502950 |
| chr2 | 98502950 | 98503050 | 1152-Lng-A-T | 95  | chr2:98502950-98503050 |
| chr2 | 98502950 | 98503050 | 901-Lng-B-T  | 183 | chr2:98502950-98503050 |
| chr2 | 98502950 | 98503050 | 901-Lng-A-T  | 129 | chr2:98502950-98503050 |
| chr2 | 98502950 | 98503050 | 1065-Lng-C-T | 179 | chr2:98502950-98503050 |
| chr2 | 98502950 | 98503050 | 846-Lng-A-T  | 286 | chr2:98502950-98503050 |
| chr2 | 98502950 | 98503050 | 901-Lng-C-T  | 41  | chr2:98502950-98503050 |
| chr2 | 98502950 | 98503050 | 1090-Lng-A-T | 104 | chr2:98502950-98503050 |
| chr2 | 98502950 | 98503050 | 1065-Lng-B-T | 196 | chr2:98502950-98503050 |
| chr2 | 98502950 | 98503050 | 1223-Lng-C-T | 69  | chr2:98502950-98503050 |
| chr2 | 98502950 | 98503050 | 1072-Lng-A-T | 104 | chr2:98502950-98503050 |
| chr2 | 98502950 | 98503050 | 1065-Lng-C-T | 107 | chr2:98502950-98503050 |
| chr2 | 98502950 | 98503050 | 901-Lng-D-T  | 184 | chr2:98502950-98503050 |
| chr2 | 98502950 | 98503050 | 1223-Lng-D-T | 43  | chr2:98502950-98503050 |
| chr2 | 98502950 | 98503050 | 1004-Lng-A-T | 355 | chr2:98502950-98503050 |
| chr2 | 98502950 | 98503050 | 1090-Lng-B-T | 580 | chr2:98502950-98503050 |
| chr2 | 98502950 | 98503050 | 1223-Lng-B-T | 53  | chr2:98502950-98503050 |
| chr2 | 98502950 | 98503050 | 901-Lng-C-T  | 40  | chr2:98502950-98503050 |
| chr2 | 98503950 | 98504050 | 1065-Lng-B-T | 69  | chr2:98503950-98504050 |
| chr2 | 98504050 | 98504150 | 1065-Lng-C-T | 89  | chr2:98504050-98504150 |
| chr2 | 98504050 | 98504150 | 901-Lng-C-T  | 36  | chr2:98504050-98504150 |
| chr2 | 98505050 | 98505150 | 901-Lng-A-T  | 81  | chr2:98505050-98505150 |
| chr2 | 98505050 | 98505150 | 1072-Lng-A-T | 87  | chr2:98505050-98505150 |
| chr2 | 98505050 | 98505150 | 901-Lng-A-T  | 82  | chr2:98505050-98505150 |
| chr2 | 98505050 | 98505150 | 1065-Lng-C-T | 155 | chr2:98505050-98505150 |
| chr2 | 98505050 | 98505150 | 846-Lng-A-T  | 149 | chr2:98505050-98505150 |
| chr2 | 98505150 | 98505250 | 846-Lng-A-T  | 176 | chr2:98505150-98505250 |
| chr2 | 98505150 | 98505250 | 1065-Lng-B-T | 79  | chr2:98505150-98505250 |
| chr2 | 98505350 | 98505450 | 1065-Lng-B-T | 55  | chr2:98505350-98505450 |
| chr2 | 98505350 | 98505450 | 1065-Lng-C-T | 187 | chr2:98505350-98505450 |
| chr2 | 98505350 | 98505450 | 1090-Lng-A-T | 70  | chr2:98505350-98505450 |
| chr2 | 98505350 | 98505450 | 1223-Lng-C-T | 53  | chr2:98505350-98505450 |
| chr2 | 98505350 | 98505450 | 1090-Lng-B-T | 325 | chr2:98505350-98505450 |
| chr2 | 98505350 | 98505450 | 1152-Lng-A-T | 77  | chr2:98505350-98505450 |

**Table S2: SB Insertion regions**

|      |          |          |              |     |                        |
|------|----------|----------|--------------|-----|------------------------|
| chr2 | 98505350 | 98505450 | 901-Lng-A-T  | 86  | chr2:98505350-98505450 |
| chr2 | 98505350 | 98505450 | 1223-Lng-A-T | 186 | chr2:98505350-98505450 |
| chr2 | 98505350 | 98505450 | 1274-Lng-A-T | 72  | chr2:98505350-98505450 |
| chr2 | 98506350 | 98506450 | 1065-Lng-A-T | 74  | chr2:98506350-98506450 |
| chr2 | 98506350 | 98506450 | 1004-Lng-A-T | 153 | chr2:98506350-98506450 |
| chr2 | 98506350 | 98506450 | 1223-Lng-B-T | 39  | chr2:98506350-98506450 |
| chr2 | 98506350 | 98506450 | 1065-Lng-B-T | 205 | chr2:98506350-98506450 |
| chr2 | 98506350 | 98506450 | 1065-Lng-C-T | 96  | chr2:98506350-98506450 |
| chr2 | 98506350 | 98506450 | 1072-Lng-A-T | 60  | chr2:98506350-98506450 |
| chr2 | 98506350 | 98506450 | 1065-Lng-A-T | 101 | chr2:98506350-98506450 |
| chr2 | 98506350 | 98506450 | 901-Lng-C-T  | 94  | chr2:98506350-98506450 |
| chr2 | 98506450 | 98506550 | 1065-Lng-C-T | 127 | chr2:98506450-98506550 |
| chr2 | 98506450 | 98506550 | 1072-Lng-A-T | 64  | chr2:98506450-98506550 |
| chr2 | 98506450 | 98506550 | 1151-Lng-A-T | 81  | chr2:98506450-98506550 |
| chr2 | 98506450 | 98506550 | 1274-Lng-A-T | 49  | chr2:98506450-98506550 |
| chr2 | 98506450 | 98506550 | 1090-Lng-A-T | 167 | chr2:98506450-98506550 |
| chr2 | 98506450 | 98506550 | 1100-Lng-B-T | 62  | chr2:98506450-98506550 |
| chr2 | 98506450 | 98506550 | 846-Lng-A-T  | 231 | chr2:98506450-98506550 |
| chr2 | 98506450 | 98506550 | 1004-Lng-A-T | 276 | chr2:98506450-98506550 |
| chr2 | 98506550 | 98506650 | 1152-Lng-A-T | 38  | chr2:98506550-98506650 |
| chr2 | 98506550 | 98506650 | 1065-Lng-A-T | 85  | chr2:98506550-98506650 |
| chr2 | 98506550 | 98506650 | 1004-Lng-A-T | 96  | chr2:98506550-98506650 |
| chr2 | 98506550 | 98506650 | 901-Lng-C-T  | 57  | chr2:98506550-98506650 |
| chr2 | 98506550 | 98506650 | 1065-Lng-C-T | 202 | chr2:98506550-98506650 |
| chr2 | 98506550 | 98506650 | 1100-Lng-A-T | 57  | chr2:98506550-98506650 |
| chr2 | 98506550 | 98506650 | 1065-Lng-B-T | 102 | chr2:98506550-98506650 |
| chr2 | 98506650 | 98506750 | 901-Lng-A-T  | 68  | chr2:98506650-98506750 |
| chr2 | 98506650 | 98506750 | 1100-Lng-B-T | 61  | chr2:98506650-98506750 |
| chr2 | 98506650 | 98506750 | 901-Lng-D-T  | 137 | chr2:98506650-98506750 |
| chr2 | 98506650 | 98506750 | 846-Lng-A-T  | 147 | chr2:98506650-98506750 |
| chr2 | 98506650 | 98506750 | 1223-Lng-D-T | 45  | chr2:98506650-98506750 |
| chr2 | 98506650 | 98506750 | 1065-Lng-B-T | 93  | chr2:98506650-98506750 |
| chr2 | 98506650 | 98506750 | 1072-Lng-A-T | 72  | chr2:98506650-98506750 |
| chr2 | 98506650 | 98506750 | 1065-Lng-A-T | 167 | chr2:98506650-98506750 |
| chr2 | 98506650 | 98506750 | 901-Lng-B-T  | 254 | chr2:98506650-98506750 |
| chr2 | 98506650 | 98506750 | 1223-Lng-C-T | 60  | chr2:98506650-98506750 |
| chr2 | 98506650 | 98506750 | 1004-Lng-A-T | 241 | chr2:98506650-98506750 |
| chr2 | 98506650 | 98506750 | 901-Lng-C-T  | 67  | chr2:98506650-98506750 |
| chr2 | 98506650 | 98506750 | 1274-Lng-A-T | 106 | chr2:98506650-98506750 |
| chr2 | 98506650 | 98506750 | 1065-Lng-C-T | 148 | chr2:98506650-98506750 |
| chr2 | 98506850 | 98506950 | 901-Lng-B-T  | 53  | chr2:98506850-98506950 |
| chr2 | 98506850 | 98506950 | 1004-Lng-A-T | 50  | chr2:98506850-98506950 |
| chr2 | 98506850 | 98506950 | 1065-Lng-B-T | 89  | chr2:98506850-98506950 |
| chr2 | 98506950 | 98507050 | 1004-Lng-A-T | 79  | chr2:98506950-98507050 |
| chr2 | 98507050 | 98507150 | 1004-Lng-A-T | 65  | chr2:98507050-98507150 |
| chr2 | 98507050 | 98507150 | 901-Lng-D-T  | 145 | chr2:98507050-98507150 |

**Table S2: SB Insertion regions**

|      |           |           |              |     |                          |
|------|-----------|-----------|--------------|-----|--------------------------|
| chr2 | 98507150  | 98507250  | 1223-Lng-B-T | 44  | chr2:98507150-98507250   |
| chr2 | 98507250  | 98507350  | 1090-Lng-A-T | 168 | chr2:98507250-98507350   |
| chr2 | 98507250  | 98507350  | 901-Lng-C-T  | 65  | chr2:98507250-98507350   |
| chr2 | 98507250  | 98507350  | 1065-Lng-B-T | 232 | chr2:98507250-98507350   |
| chr2 | 98507250  | 98507350  | 1065-Lng-C-T | 299 | chr2:98507250-98507350   |
| chr2 | 98507250  | 98507350  | 1152-Lng-A-T | 32  | chr2:98507250-98507350   |
| chr2 | 98507250  | 98507350  | 901-Lng-A-T  | 120 | chr2:98507250-98507350   |
| chr2 | 98507250  | 98507350  | 901-Lng-B-T  | 85  | chr2:98507250-98507350   |
| chr2 | 98507250  | 98507350  | 1004-Lng-A-T | 173 | chr2:98507250-98507350   |
| chr2 | 98507250  | 98507350  | 846-Lng-A-T  | 59  | chr2:98507250-98507350   |
| chr2 | 98507250  | 98507350  | 1167-Lng-A-T | 49  | chr2:98507250-98507350   |
| chr2 | 98507250  | 98507350  | 901-Lng-A-T  | 134 | chr2:98507250-98507350   |
| chr2 | 98507250  | 98507350  | 901-Lng-B-T  | 299 | chr2:98507250-98507350   |
| chr2 | 98507350  | 98507450  | 1065-Lng-A-T | 63  | chr2:98507350-98507450   |
| chr2 | 98507350  | 98507450  | 1004-Lng-A-T | 114 | chr2:98507350-98507450   |
| chr2 | 98507350  | 98507450  | 846-Lng-A-T  | 49  | chr2:98507350-98507450   |
| chr2 | 98507350  | 98507450  | 901-Lng-B-T  | 208 | chr2:98507350-98507450   |
| chr2 | 98507350  | 98507450  | 1065-Lng-B-T | 128 | chr2:98507350-98507450   |
| chr2 | 98507350  | 98507450  | 1065-Lng-C-T | 126 | chr2:98507350-98507450   |
| chr2 | 98510150  | 98510250  | 1152-Lng-A-T | 89  | chr2:98510150-98510250   |
| chr2 | 98559350  | 98559450  | 1152-Lng-A-T | 91  | chr2:98559350-98559450   |
| chr2 | 98747450  | 98747550  | 1065-Lng-A-T | 37  | chr2:98747450-98747550   |
| chr2 | 98775150  | 98775250  | 1100-Lng-A-T | 133 | chr2:98775150-98775250   |
| chr2 | 98829650  | 98829750  | 1100-Lng-A-T | 120 | chr2:98829650-98829750   |
| chr2 | 98908650  | 98908750  | 1004-Lng-A-T | 113 | chr2:98908650-98908750   |
| chr2 | 98931150  | 98931250  | 1100-Lng-A-T | 52  | chr2:98931150-98931250   |
| chr2 | 99023550  | 99023650  | 1065-Lng-B-T | 55  | chr2:99023550-99023650   |
| chr2 | 99230250  | 99230350  | 1065-Lng-C-T | 65  | chr2:99230250-99230350   |
| chr2 | 99513450  | 99513550  | 1065-Lng-C-T | 81  | chr2:99513450-99513550   |
| chr2 | 99607950  | 99608050  | 1223-Lng-C-T | 50  | chr2:99607950-99608050   |
| chr2 | 99680750  | 99680850  | 1065-Lng-A-T | 57  | chr2:99680750-99680850   |
| chr2 | 99770450  | 99770550  | 1100-Lng-A-T | 67  | chr2:99770450-99770550   |
| chr2 | 100100750 | 100100850 | 1090-Lng-A-T | 103 | chr2:100100750-100100850 |
| chr2 | 100206650 | 100206750 | 1100-Lng-A-T | 58  | chr2:100206650-100206750 |
| chr2 | 100238150 | 100238250 | 1004-Lng-A-T | 178 | chr2:100238150-100238250 |
| chr2 | 100253550 | 100253650 | 1090-Lng-A-T | 65  | chr2:100253550-100253650 |
| chr2 | 100624650 | 100624750 | 1090-Lng-A-T | 90  | chr2:100624650-100624750 |
| chr2 | 100732550 | 100732650 | 1065-Lng-A-T | 63  | chr2:100732550-100732650 |
| chr2 | 100943250 | 100943350 | 1065-Lng-C-T | 101 | chr2:100943250-100943350 |
| chr2 | 101054450 | 101054550 | 846-Lng-A-T  | 67  | chr2:101054450-101054550 |
| chr2 | 101310650 | 101310750 | 1065-Lng-C-T | 83  | chr2:101310650-101310750 |
| chr2 | 101366250 | 101366350 | 1188-Lng-A-T | 35  | chr2:101366250-101366350 |
| chr2 | 101436850 | 101436950 | 1065-Lng-B-T | 75  | chr2:101436850-101436950 |
| chr2 | 101460850 | 101460950 | 1072-Lng-A-T | 174 | chr2:101460850-101460950 |
| chr2 | 101494650 | 101494750 | 901-Lng-B-T  | 157 | chr2:101494650-101494750 |
| chr2 | 101775550 | 101775650 | 1274-Lng-A-T | 280 | chr2:101775550-101775650 |



**Table S2: SB Insertion regions**

|      |           |           |              |      |                          |
|------|-----------|-----------|--------------|------|--------------------------|
| chr2 | 101793350 | 101793450 | 1090-Lng-A-T | 639  | chr2:101793350-101793450 |
| chr2 | 102158050 | 102158150 | 901-Lng-C-T  | 62   | chr2:102158050-102158150 |
| chr2 | 102200650 | 102200750 | 1223-Lng-D-T | 60   | chr2:102200650-102200750 |
| chr2 | 102217850 | 102217950 | 1152-Lng-A-T | 98   | chr2:102217850-102217950 |
| chr2 | 102225050 | 102225150 | 1151-Lng-A-T | 60   | chr2:102225050-102225150 |
| chr2 | 102249150 | 102249250 | 1167-Lng-A-T | 51   | chr2:102249150-102249250 |
| chr2 | 102658550 | 102658650 | 1004-Lng-A-T | 1356 | chr2:102658550-102658650 |
| chr2 | 102709250 | 102709350 | 846-Lng-A-T  | 179  | chr2:102709250-102709350 |
| chr2 | 102857550 | 102857650 | 1072-Lng-A-T | 99   | chr2:102857550-102857650 |
| chr2 | 102876850 | 102876950 | 1151-Lng-A-T | 367  | chr2:102876850-102876950 |
| chr2 | 102891150 | 102891250 | 1188-Lng-A-T | 73   | chr2:102891150-102891250 |
| chr2 | 102918050 | 102918150 | 846-Lng-A-T  | 57   | chr2:102918050-102918150 |
| chr2 | 102962150 | 102962250 | 1223-Lng-C-T | 75   | chr2:102962150-102962250 |
| chr2 | 103093850 | 103093950 | 1090-Lng-A-T | 1034 | chr2:103093850-103093950 |
| chr2 | 103095850 | 103095950 | 1152-Lng-A-T | 74   | chr2:103095850-103095950 |
| chr2 | 103142650 | 103142750 | 1167-Lng-A-T | 2341 | chr2:103142650-103142750 |
| chr2 | 103229850 | 103229950 | 1151-Lng-A-T | 60   | chr2:103229850-103229950 |
| chr2 | 103281950 | 103282050 | 1065-Lng-A-T | 63   | chr2:103281950-103282050 |
| chr2 | 103288350 | 103288450 | 1065-Lng-C-T | 71   | chr2:103288350-103288450 |
| chr2 | 103361050 | 103361150 | 1065-Lng-C-T | 388  | chr2:103361050-103361150 |
| chr2 | 103595350 | 103595450 | 1223-Lng-D-T | 125  | chr2:103595350-103595450 |
| chr2 | 103606050 | 103606150 | 901-Lng-A-T  | 82   | chr2:103606050-103606150 |
| chr2 | 103632050 | 103632150 | 1223-Lng-A-T | 215  | chr2:103632050-103632150 |
| chr2 | 103812650 | 103812750 | 1223-Lng-A-T | 92   | chr2:103812650-103812750 |
| chr2 | 103881950 | 103882050 | 1100-Lng-A-T | 85   | chr2:103881950-103882050 |
| chr2 | 104060950 | 104061050 | 1151-Lng-A-T | 224  | chr2:104060950-104061050 |
| chr2 | 104245250 | 104245350 | 1100-Lng-A-T | 75   | chr2:104245250-104245350 |
| chr2 | 104262950 | 104263050 | 1090-Lng-A-T | 69   | chr2:104262950-104263050 |
| chr2 | 104282650 | 104282750 | 1223-Lng-B-T | 73   | chr2:104282650-104282750 |
| chr2 | 104322350 | 104322450 | 1100-Lng-A-T | 83   | chr2:104322350-104322450 |
| chr2 | 104350650 | 104350750 | 901-Lng-C-T  | 57   | chr2:104350650-104350750 |
| chr2 | 104421150 | 104421250 | 1274-Lng-A-T | 62   | chr2:104421150-104421250 |
| chr2 | 104421150 | 104421250 | 1188-Lng-A-T | 78   | chr2:104421150-104421250 |
| chr2 | 104434350 | 104434450 | 1274-Lng-A-T | 50   | chr2:104434350-104434450 |
| chr2 | 104443950 | 104444050 | 901-Lng-A-T  | 52   | chr2:104443950-104444050 |
| chr2 | 104448650 | 104448750 | 901-Lng-C-T  | 35   | chr2:104448650-104448750 |
| chr2 | 104464350 | 104464450 | 1274-Lng-A-T | 129  | chr2:104464350-104464450 |
| chr2 | 104466950 | 104467050 | 1100-Lng-B-T | 64   | chr2:104466950-104467050 |
| chr2 | 104470850 | 104470950 | 1223-Lng-D-T | 367  | chr2:104470850-104470950 |
| chr2 | 104496150 | 104496250 | 901-Lng-A-T  | 92   | chr2:104496150-104496250 |
| chr2 | 104578750 | 104578850 | 1223-Lng-D-T | 110  | chr2:104578750-104578850 |
| chr2 | 104617350 | 104617450 | 1274-Lng-A-T | 100  | chr2:104617350-104617450 |
| chr2 | 105032750 | 105032850 | 901-Lng-A-T  | 53   | chr2:105032750-105032850 |
| chr2 | 105092950 | 105093050 | 1065-Lng-B-T | 86   | chr2:105092950-105093050 |
| chr2 | 105095150 | 105095250 | 1152-Lng-A-T | 65   | chr2:105095150-105095250 |
| chr2 | 105138450 | 105138550 | 901-Lng-C-T  | 80   | chr2:105138450-105138550 |

**Table S2: SB Insertion regions**

|      |           |           |              |      |                          |
|------|-----------|-----------|--------------|------|--------------------------|
| chr2 | 105209450 | 105209550 | 1090-Lng-B-T | 567  | chr2:105209450-105209550 |
| chr2 | 105442550 | 105442650 | 1274-Lng-A-T | 75   | chr2:105442550-105442650 |
| chr2 | 105461250 | 105461350 | 1065-Lng-C-T | 71   | chr2:105461250-105461350 |
| chr2 | 105558250 | 105558350 | 1151-Lng-A-T | 793  | chr2:105558250-105558350 |
| chr2 | 105633550 | 105633650 | 1152-Lng-A-T | 64   | chr2:105633550-105633650 |
| chr2 | 105637850 | 105637950 | 1065-Lng-A-T | 51   | chr2:105637850-105637950 |
| chr2 | 106585850 | 106585950 | 1065-Lng-A-T | 67   | chr2:106585850-106585950 |
| chr2 | 106699450 | 106699550 | 1065-Lng-C-T | 164  | chr2:106699450-106699550 |
| chr2 | 106856850 | 106856950 | 1072-Lng-A-T | 117  | chr2:106856850-106856950 |
| chr2 | 106917150 | 106917250 | 1152-Lng-A-T | 35   | chr2:106917150-106917250 |
| chr2 | 106999850 | 106999950 | 1072-Lng-A-T | 139  | chr2:106999850-106999950 |
| chr2 | 107154950 | 107155050 | 901-Lng-D-T  | 128  | chr2:107154950-107155050 |
| chr2 | 107198150 | 107198250 | 1223-Lng-B-T | 40   | chr2:107198150-107198250 |
| chr2 | 107262450 | 107262550 | 1223-Lng-C-T | 51   | chr2:107262450-107262550 |
| chr2 | 107413150 | 107413250 | 1151-Lng-A-T | 55   | chr2:107413150-107413250 |
| chr2 | 107666650 | 107666750 | 1223-Lng-B-T | 52   | chr2:107666650-107666750 |
| chr2 | 107993750 | 107993850 | 1152-Lng-A-T | 40   | chr2:107993750-107993850 |
| chr2 | 108021350 | 108021450 | 1152-Lng-A-T | 72   | chr2:108021350-108021450 |
| chr2 | 108026850 | 108026950 | 1188-Lng-A-T | 55   | chr2:108026850-108026950 |
| chr2 | 108070750 | 108070850 | 846-Lng-A-T  | 60   | chr2:108070750-108070850 |
| chr2 | 108152550 | 108152650 | 1065-Lng-C-T | 80   | chr2:108152550-108152650 |
| chr2 | 108191450 | 108191550 | 1100-Lng-A-T | 88   | chr2:108191450-108191550 |
| chr2 | 108251150 | 108251250 | 1065-Lng-B-T | 65   | chr2:108251150-108251250 |
| chr2 | 108350150 | 108350250 | 901-Lng-B-T  | 129  | chr2:108350150-108350250 |
| chr2 | 108507650 | 108507750 | 1072-Lng-A-T | 133  | chr2:108507650-108507750 |
| chr2 | 108852550 | 108852650 | 1274-Lng-A-T | 86   | chr2:108852550-108852650 |
| chr2 | 108890150 | 108890250 | 1223-Lng-B-T | 162  | chr2:108890150-108890250 |
| chr2 | 108924350 | 108924450 | 1152-Lng-A-T | 100  | chr2:108924350-108924450 |
| chr2 | 109008050 | 109008150 | 901-Lng-D-T  | 295  | chr2:109008050-109008150 |
| chr2 | 109055350 | 109055450 | 1223-Lng-A-T | 1183 | chr2:109055350-109055450 |
| chr2 | 109117050 | 109117150 | 1151-Lng-A-T | 62   | chr2:109117050-109117150 |
| chr2 | 109572150 | 109572250 | 901-Lng-C-T  | 40   | chr2:109572150-109572250 |
| chr2 | 109596650 | 109596750 | 901-Lng-A-T  | 466  | chr2:109596650-109596750 |
| chr2 | 109769850 | 109769950 | 1090-Lng-A-T | 46   | chr2:109769850-109769950 |
| chr2 | 109941850 | 109941950 | 901-Lng-A-T  | 579  | chr2:109941850-109941950 |
| chr2 | 110479050 | 110479150 | 1223-Lng-C-T | 57   | chr2:110479050-110479150 |
| chr2 | 111002650 | 111002750 | 846-Lng-A-T  | 1673 | chr2:111002650-111002750 |
| chr2 | 111160750 | 111160850 | 1065-Lng-A-T | 77   | chr2:111160750-111160850 |
| chr2 | 111257350 | 111257450 | 1004-Lng-A-T | 58   | chr2:111257350-111257450 |
| chr2 | 111331650 | 111331750 | 1065-Lng-A-T | 48   | chr2:111331650-111331750 |
| chr2 | 111463050 | 111463150 | 1090-Lng-A-T | 89   | chr2:111463050-111463150 |
| chr2 | 111574750 | 111574850 | 1065-Lng-A-T | 38   | chr2:111574750-111574850 |
| chr2 | 111591750 | 111591850 | 1072-Lng-A-T | 59   | chr2:111591750-111591850 |
| chr2 | 111721850 | 111721950 | 1090-Lng-B-T | 837  | chr2:111721850-111721950 |
| chr2 | 112087750 | 112087850 | 1065-Lng-B-T | 80   | chr2:112087750-112087850 |
| chr2 | 112097750 | 112097850 | 1188-Lng-A-T | 48   | chr2:112097750-112097850 |

**Table S2: SB Insertion regions**

|      |           |           |              |     |                          |
|------|-----------|-----------|--------------|-----|--------------------------|
| chr2 | 112129150 | 112129250 | 1090-Lng-A-T | 721 | chr2:112129150-112129250 |
| chr2 | 112137650 | 112137750 | 1065-Lng-A-T | 60  | chr2:112137650-112137750 |
| chr2 | 112205650 | 112205750 | 1065-Lng-A-T | 55  | chr2:112205650-112205750 |
| chr2 | 112223450 | 112223550 | 1167-Lng-A-T | 75  | chr2:112223450-112223550 |
| chr2 | 112232550 | 112232650 | 1004-Lng-A-T | 57  | chr2:112232550-112232650 |
| chr2 | 112237050 | 112237150 | 1151-Lng-A-T | 74  | chr2:112237050-112237150 |
| chr2 | 112284750 | 112284850 | 901-Lng-B-T  | 202 | chr2:112284750-112284850 |
| chr2 | 112889950 | 112890050 | 1100-Lng-A-T | 58  | chr2:112889950-112890050 |
| chr2 | 113252550 | 113252650 | 1167-Lng-A-T | 84  | chr2:113252550-113252650 |
| chr2 | 113401250 | 113401350 | 1152-Lng-A-T | 63  | chr2:113401250-113401350 |
| chr2 | 113483850 | 113483950 | 846-Lng-A-T  | 116 | chr2:113483850-113483950 |
| chr2 | 113510150 | 113510250 | 901-Lng-A-T  | 105 | chr2:113510150-113510250 |
| chr2 | 113838250 | 113838350 | 1223-Lng-B-T | 197 | chr2:113838250-113838350 |
| chr2 | 113865050 | 113865150 | 1274-Lng-A-T | 63  | chr2:113865050-113865150 |
| chr2 | 113988550 | 113988650 | 1274-Lng-A-T | 130 | chr2:113988550-113988650 |
| chr2 | 113998450 | 113998550 | 901-Lng-B-T  | 140 | chr2:113998450-113998550 |
| chr2 | 114159250 | 114159350 | 1065-Lng-A-T | 40  | chr2:114159250-114159350 |
| chr2 | 114211350 | 114211450 | 1065-Lng-C-T | 101 | chr2:114211350-114211450 |
| chr2 | 114403750 | 114403850 | 1223-Lng-B-T | 35  | chr2:114403750-114403850 |
| chr2 | 114531350 | 114531450 | 901-Lng-D-T  | 220 | chr2:114531350-114531450 |
| chr2 | 114596950 | 114597050 | 901-Lng-A-T  | 112 | chr2:114596950-114597050 |
| chr2 | 114609550 | 114609650 | 1065-Lng-C-T | 63  | chr2:114609550-114609650 |
| chr2 | 115002150 | 115002250 | 1274-Lng-A-T | 67  | chr2:115002150-115002250 |
| chr2 | 115014650 | 115014750 | 1065-Lng-C-T | 85  | chr2:115014650-115014750 |
| chr2 | 115134050 | 115134150 | 1223-Lng-A-T | 99  | chr2:115134050-115134150 |
| chr2 | 115195850 | 115195950 | 1072-Lng-A-T | 57  | chr2:115195850-115195950 |
| chr2 | 115266350 | 115266450 | 1223-Lng-C-T | 153 | chr2:115266350-115266450 |
| chr2 | 115594050 | 115594150 | 1152-Lng-A-T | 65  | chr2:115594050-115594150 |
| chr2 | 115616350 | 115616450 | 1004-Lng-A-T | 73  | chr2:115616350-115616450 |
| chr2 | 116266050 | 116266150 | 901-Lng-B-T  | 118 | chr2:116266050-116266150 |
| chr2 | 116640850 | 116640950 | 901-Lng-C-T  | 61  | chr2:116640850-116640950 |
| chr2 | 116749750 | 116749850 | 1065-Lng-B-T | 67  | chr2:116749750-116749850 |
| chr2 | 116831350 | 116831450 | 1004-Lng-A-T | 116 | chr2:116831350-116831450 |
| chr2 | 116858150 | 116858250 | 901-Lng-A-T  | 56  | chr2:116858150-116858250 |
| chr2 | 116957050 | 116957150 | 1100-Lng-A-T | 105 | chr2:116957050-116957150 |
| chr2 | 116965650 | 116965750 | 1065-Lng-A-T | 39  | chr2:116965650-116965750 |
| chr2 | 116989550 | 116989650 | 1274-Lng-A-T | 54  | chr2:116989550-116989650 |
| chr2 | 116992950 | 116993050 | 1065-Lng-C-T | 69  | chr2:116992950-116993050 |
| chr2 | 117230150 | 117230250 | 1274-Lng-A-T | 92  | chr2:117230150-117230250 |
| chr2 | 117520050 | 117520150 | 1151-Lng-A-T | 100 | chr2:117520050-117520150 |
| chr2 | 117550250 | 117550350 | 901-Lng-B-T  | 208 | chr2:117550250-117550350 |
| chr2 | 117726450 | 117726550 | 1188-Lng-A-T | 39  | chr2:117726450-117726550 |
| chr2 | 117741950 | 117742050 | 901-Lng-B-T  | 133 | chr2:117741950-117742050 |
| chr2 | 118025950 | 118026050 | 1223-Lng-A-T | 164 | chr2:118025950-118026050 |
| chr2 | 118218450 | 118218550 | 1274-Lng-A-T | 92  | chr2:118218450-118218550 |
| chr2 | 118225650 | 118225750 | 1274-Lng-A-T | 101 | chr2:118225650-118225750 |

**Table S2: SB Insertion regions**

|      |           |           |              |      |                          |
|------|-----------|-----------|--------------|------|--------------------------|
| chr2 | 118349650 | 118349750 | 1100-Lng-A-T | 58   | chr2:118349650-118349750 |
| chr2 | 118419350 | 118419450 | 901-Lng-C-T  | 62   | chr2:118419350-118419450 |
| chr2 | 118751550 | 118751650 | 1167-Lng-A-T | 64   | chr2:118751550-118751650 |
| chr2 | 118789050 | 118789150 | 1072-Lng-A-T | 71   | chr2:118789050-118789150 |
| chr2 | 118921650 | 118921750 | 1152-Lng-A-T | 44   | chr2:118921650-118921750 |
| chr2 | 118962950 | 118963050 | 1072-Lng-A-T | 87   | chr2:118962950-118963050 |
| chr2 | 119031450 | 119031550 | 1065-Lng-B-T | 236  | chr2:119031450-119031550 |
| chr2 | 119038750 | 119038850 | 1100-Lng-A-T | 95   | chr2:119038750-119038850 |
| chr2 | 119232150 | 119232250 | 1004-Lng-A-T | 79   | chr2:119232150-119232250 |
| chr2 | 119258250 | 119258350 | 1274-Lng-A-T | 68   | chr2:119258250-119258350 |
| chr2 | 119267650 | 119267750 | 846-Lng-A-T  | 397  | chr2:119267650-119267750 |
| chr2 | 119281250 | 119281350 | 1152-Lng-A-T | 77   | chr2:119281250-119281350 |
| chr2 | 119300550 | 119300650 | 1223-Lng-B-T | 46   | chr2:119300550-119300650 |
| chr2 | 119381550 | 119381650 | 1100-Lng-A-T | 105  | chr2:119381550-119381650 |
| chr2 | 119393650 | 119393750 | 1065-Lng-A-T | 70   | chr2:119393650-119393750 |
| chr2 | 119396950 | 119397050 | 1188-Lng-A-T | 50   | chr2:119396950-119397050 |
| chr2 | 119418350 | 119418450 | 1100-Lng-A-T | 51   | chr2:119418350-119418450 |
| chr2 | 119422050 | 119422150 | 1167-Lng-A-T | 98   | chr2:119422050-119422150 |
| chr2 | 119424750 | 119424850 | 1274-Lng-A-T | 81   | chr2:119424750-119424850 |
| chr2 | 119429750 | 119429850 | 1223-Lng-D-T | 42   | chr2:119429750-119429850 |
| chr2 | 119624950 | 119625050 | 1151-Lng-A-T | 118  | chr2:119624950-119625050 |
| chr2 | 119675950 | 119676050 | 901-Lng-A-T  | 156  | chr2:119675950-119676050 |
| chr2 | 119730550 | 119730650 | 1167-Lng-A-T | 138  | chr2:119730550-119730650 |
| chr2 | 119737150 | 119737250 | 1004-Lng-A-T | 78   | chr2:119737150-119737250 |
| chr2 | 119817350 | 119817450 | 1151-Lng-A-T | 62   | chr2:119817350-119817450 |
| chr2 | 119932550 | 119932650 | 1090-Lng-B-T | 180  | chr2:119932550-119932650 |
| chr2 | 119933850 | 119933950 | 1152-Lng-A-T | 47   | chr2:119933850-119933950 |
| chr2 | 119949150 | 119949250 | 1223-Lng-C-T | 69   | chr2:119949150-119949250 |
| chr2 | 119949650 | 119949750 | 1065-Lng-C-T | 2561 | chr2:119949650-119949750 |
| chr2 | 119952250 | 119952350 | 1223-Lng-B-T | 122  | chr2:119952250-119952350 |
| chr2 | 119978450 | 119978550 | 901-Lng-D-T  | 73   | chr2:119978450-119978550 |
| chr2 | 120174450 | 120174550 | 1274-Lng-A-T | 119  | chr2:120174450-120174550 |
| chr2 | 120174750 | 120174850 | 1100-Lng-A-T | 103  | chr2:120174750-120174850 |
| chr2 | 120188050 | 120188150 | 1151-Lng-A-T | 179  | chr2:120188050-120188150 |
| chr2 | 120260250 | 120260350 | 1188-Lng-A-T | 86   | chr2:120260250-120260350 |
| chr2 | 120325650 | 120325750 | 1100-Lng-A-T | 66   | chr2:120325650-120325750 |
| chr2 | 120370750 | 120370850 | 1274-Lng-A-T | 118  | chr2:120370750-120370850 |
| chr2 | 120395950 | 120396050 | 901-Lng-D-T  | 49   | chr2:120395950-120396050 |
| chr2 | 120395950 | 120396050 | 901-Lng-C-T  | 42   | chr2:120395950-120396050 |
| chr2 | 120395950 | 120396050 | 1223-Lng-B-T | 70   | chr2:120395950-120396050 |
| chr2 | 120395950 | 120396050 | 901-Lng-A-T  | 66   | chr2:120395950-120396050 |
| chr2 | 120395950 | 120396050 | 901-Lng-B-T  | 42   | chr2:120395950-120396050 |
| chr2 | 120395950 | 120396050 | 1072-Lng-A-T | 65   | chr2:120395950-120396050 |
| chr2 | 120395950 | 120396050 | 1090-Lng-B-T | 70   | chr2:120395950-120396050 |
| chr2 | 120395950 | 120396050 | 1188-Lng-A-T | 102  | chr2:120395950-120396050 |
| chr2 | 120395950 | 120396050 | 846-Lng-A-T  | 95   | chr2:120395950-120396050 |

**Table S2: SB Insertion regions**

|      |           |           |              |     |                          |
|------|-----------|-----------|--------------|-----|--------------------------|
| chr2 | 120395950 | 120396050 | 1152-Lng-A-T | 31  | chr2:120395950-120396050 |
| chr2 | 120421850 | 120421950 | 1065-Lng-B-T | 44  | chr2:120421850-120421950 |
| chr2 | 120451550 | 120451650 | 1090-Lng-A-T | 47  | chr2:120451550-120451650 |
| chr2 | 120723850 | 120723950 | 846-Lng-A-T  | 79  | chr2:120723850-120723950 |
| chr2 | 120730650 | 120730750 | 1223-Lng-B-T | 220 | chr2:120730650-120730750 |
| chr2 | 120826250 | 120826350 | 901-Lng-C-T  | 37  | chr2:120826250-120826350 |
| chr2 | 120937050 | 120937150 | 1152-Lng-A-T | 104 | chr2:120937050-120937150 |
| chr2 | 120978350 | 120978450 | 1188-Lng-A-T | 45  | chr2:120978350-120978450 |
| chr2 | 120998750 | 120998850 | 901-Lng-B-T  | 185 | chr2:120998750-120998850 |
| chr2 | 121097950 | 121098050 | 1065-Lng-C-T | 112 | chr2:121097950-121098050 |
| chr2 | 121194350 | 121194450 | 1274-Lng-A-T | 169 | chr2:121194350-121194450 |
| chr2 | 121244050 | 121244150 | 1274-Lng-A-T | 52  | chr2:121244050-121244150 |
| chr2 | 121253150 | 121253250 | 1274-Lng-A-T | 83  | chr2:121253150-121253250 |
| chr2 | 121285650 | 121285750 | 1065-Lng-B-T | 193 | chr2:121285650-121285750 |
| chr2 | 121362050 | 121362150 | 1065-Lng-B-T | 61  | chr2:121362050-121362150 |
| chr2 | 121685650 | 121685750 | 901-Lng-A-T  | 162 | chr2:121685650-121685750 |
| chr2 | 121786950 | 121787050 | 1065-Lng-A-T | 72  | chr2:121786950-121787050 |
| chr2 | 121791950 | 121792050 | 1072-Lng-A-T | 78  | chr2:121791950-121792050 |
| chr2 | 121799050 | 121799150 | 1223-Lng-A-T | 158 | chr2:121799050-121799150 |
| chr2 | 121816250 | 121816350 | 1072-Lng-A-T | 138 | chr2:121816250-121816350 |
| chr2 | 121861850 | 121861950 | 1223-Lng-D-T | 108 | chr2:121861850-121861950 |
| chr2 | 121866050 | 121866150 | 1274-Lng-A-T | 149 | chr2:121866050-121866150 |
| chr2 | 121979250 | 121979350 | 1167-Lng-A-T | 198 | chr2:121979250-121979350 |
| chr2 | 121980050 | 121980150 | 901-Lng-A-T  | 574 | chr2:121980050-121980150 |
| chr2 | 122258350 | 122258450 | 1065-Lng-A-T | 71  | chr2:122258350-122258450 |
| chr2 | 122414450 | 122414550 | 1151-Lng-A-T | 246 | chr2:122414450-122414550 |
| chr2 | 122466750 | 122466850 | 1151-Lng-A-T | 63  | chr2:122466750-122466850 |
| chr2 | 122599450 | 122599550 | 901-Lng-D-T  | 180 | chr2:122599450-122599550 |
| chr2 | 122601950 | 122602050 | 1274-Lng-A-T | 49  | chr2:122601950-122602050 |
| chr2 | 122602650 | 122602750 | 1004-Lng-A-T | 78  | chr2:122602650-122602750 |
| chr2 | 122609650 | 122609750 | 1090-Lng-A-T | 84  | chr2:122609650-122609750 |
| chr2 | 122792550 | 122792650 | 901-Lng-D-T  | 108 | chr2:122792550-122792650 |
| chr2 | 123470750 | 123470850 | 1065-Lng-B-T | 49  | chr2:123470750-123470850 |
| chr2 | 123586350 | 123586450 | 901-Lng-C-T  | 39  | chr2:123586350-123586450 |
| chr2 | 123596750 | 123596850 | 1223-Lng-A-T | 74  | chr2:123596750-123596850 |
| chr2 | 123923250 | 123923350 | 1188-Lng-A-T | 42  | chr2:123923250-123923350 |
| chr2 | 123961950 | 123962050 | 1065-Lng-B-T | 65  | chr2:123961950-123962050 |
| chr2 | 124065050 | 124065150 | 901-Lng-A-T  | 133 | chr2:124065050-124065150 |
| chr2 | 124692450 | 124692550 | 1223-Lng-C-T | 578 | chr2:124692450-124692550 |
| chr2 | 124824050 | 124824150 | 1090-Lng-A-T | 56  | chr2:124824050-124824150 |
| chr2 | 124911750 | 124911850 | 1065-Lng-B-T | 51  | chr2:124911750-124911850 |
| chr2 | 124944050 | 124944150 | 1274-Lng-A-T | 71  | chr2:124944050-124944150 |
| chr2 | 125158550 | 125158650 | 1100-Lng-A-T | 125 | chr2:125158550-125158650 |
| chr2 | 125222050 | 125222150 | 1004-Lng-A-T | 81  | chr2:125222050-125222150 |
| chr2 | 125255550 | 125255650 | 1188-Lng-A-T | 40  | chr2:125255550-125255650 |
| chr2 | 125286350 | 125286450 | 901-Lng-C-T  | 206 | chr2:125286350-125286450 |

**Table S2: SB Insertion regions**

|      |           |           |              |      |                          |
|------|-----------|-----------|--------------|------|--------------------------|
| chr2 | 125342450 | 125342550 | 1274-Lng-A-T | 104  | chr2:125342450-125342550 |
| chr2 | 125367350 | 125367450 | 1188-Lng-A-T | 59   | chr2:125367350-125367450 |
| chr2 | 125561250 | 125561350 | 1151-Lng-A-T | 212  | chr2:125561250-125561350 |
| chr2 | 125582050 | 125582150 | 1188-Lng-A-T | 49   | chr2:125582050-125582150 |
| chr2 | 125651850 | 125651950 | 1274-Lng-A-T | 67   | chr2:125651850-125651950 |
| chr2 | 125676750 | 125676850 | 1274-Lng-A-T | 54   | chr2:125676750-125676850 |
| chr2 | 125747450 | 125747550 | 1004-Lng-A-T | 715  | chr2:125747450-125747550 |
| chr2 | 125949550 | 125949650 | 1090-Lng-A-T | 262  | chr2:125949550-125949650 |
| chr2 | 125978350 | 125978450 | 1223-Lng-C-T | 60   | chr2:125978350-125978450 |
| chr2 | 126494050 | 126494150 | 1065-Lng-B-T | 91   | chr2:126494050-126494150 |
| chr2 | 126537850 | 126537950 | 1188-Lng-A-T | 66   | chr2:126537850-126537950 |
| chr2 | 126625850 | 126625950 | 1152-Lng-A-T | 64   | chr2:126625850-126625950 |
| chr2 | 126631250 | 126631350 | 1100-Lng-A-T | 56   | chr2:126631250-126631350 |
| chr2 | 127069050 | 127069150 | 1090-Lng-A-T | 47   | chr2:127069050-127069150 |
| chr2 | 127476350 | 127476450 | 1065-Lng-B-T | 74   | chr2:127476350-127476450 |
| chr2 | 127701050 | 127701150 | 1100-Lng-A-T | 92   | chr2:127701050-127701150 |
| chr2 | 127726550 | 127726650 | 1151-Lng-A-T | 9990 | chr2:127726550-127726650 |
| chr2 | 127742450 | 127742550 | 1188-Lng-A-T | 34   | chr2:127742450-127742550 |
| chr2 | 127827950 | 127828050 | 1152-Lng-A-T | 65   | chr2:127827950-127828050 |
| chr2 | 127933550 | 127933650 | 846-Lng-A-T  | 187  | chr2:127933550-127933650 |
| chr2 | 128539050 | 128539150 | 1065-Lng-C-T | 83   | chr2:128539050-128539150 |
| chr2 | 128562050 | 128562150 | 901-Lng-A-T  | 56   | chr2:128562050-128562150 |
| chr2 | 128569850 | 128569950 | 1004-Lng-A-T | 53   | chr2:128569850-128569950 |
| chr2 | 128718750 | 128718850 | 1167-Lng-A-T | 75   | chr2:128718750-128718850 |
| chr2 | 128931950 | 128932050 | 901-Lng-C-T  | 212  | chr2:128931950-128932050 |
| chr2 | 129148150 | 129148250 | 1152-Lng-A-T | 83   | chr2:129148150-129148250 |
| chr2 | 129610450 | 129610550 | 1090-Lng-B-T | 298  | chr2:129610450-129610550 |
| chr2 | 129635750 | 129635850 | 1100-Lng-A-T | 895  | chr2:129635750-129635850 |
| chr2 | 129653350 | 129653450 | 1065-Lng-C-T | 90   | chr2:129653350-129653450 |
| chr2 | 129804350 | 129804450 | 901-Lng-A-T  | 89   | chr2:129804350-129804450 |
| chr2 | 129930150 | 129930250 | 1188-Lng-A-T | 267  | chr2:129930150-129930250 |
| chr2 | 130212750 | 130212850 | 1223-Lng-B-T | 131  | chr2:130212750-130212850 |
| chr2 | 130334450 | 130334550 | 1223-Lng-C-T | 47   | chr2:130334450-130334550 |
| chr2 | 130345850 | 130345950 | 1274-Lng-A-T | 62   | chr2:130345850-130345950 |
| chr2 | 130560350 | 130560450 | 1223-Lng-A-T | 224  | chr2:130560350-130560450 |
| chr2 | 130577150 | 130577250 | 901-Lng-C-T  | 65   | chr2:130577150-130577250 |
| chr2 | 130711950 | 130712050 | 1090-Lng-A-T | 62   | chr2:130711950-130712050 |
| chr2 | 130722150 | 130722250 | 1072-Lng-A-T | 125  | chr2:130722150-130722250 |
| chr2 | 130749650 | 130749750 | 1065-Lng-C-T | 77   | chr2:130749650-130749750 |
| chr2 | 130756450 | 130756550 | 901-Lng-A-T  | 156  | chr2:130756450-130756550 |
| chr2 | 130783650 | 130783750 | 901-Lng-B-T  | 66   | chr2:130783650-130783750 |
| chr2 | 130796650 | 130796750 | 1152-Lng-A-T | 221  | chr2:130796650-130796750 |
| chr2 | 130806750 | 130806850 | 846-Lng-A-T  | 195  | chr2:130806750-130806850 |
| chr2 | 130863750 | 130863850 | 1188-Lng-A-T | 83   | chr2:130863750-130863850 |
| chr2 | 131052250 | 131052350 | 1223-Lng-B-T | 43   | chr2:131052250-131052350 |
| chr2 | 131138250 | 131138350 | 1090-Lng-A-T | 113  | chr2:131138250-131138350 |

**Table S2: SB Insertion regions**

|      |           |           |              |     |                          |
|------|-----------|-----------|--------------|-----|--------------------------|
| chr2 | 131320450 | 131320550 | 1223-Lng-D-T | 40  | chr2:131320450-131320550 |
| chr2 | 131452550 | 131452650 | 901-Lng-A-T  | 154 | chr2:131452550-131452650 |
| chr2 | 131541450 | 131541550 | 1167-Lng-A-T | 65  | chr2:131541450-131541550 |
| chr2 | 131922650 | 131922750 | 1188-Lng-A-T | 35  | chr2:131922650-131922750 |
| chr2 | 131942450 | 131942550 | 901-Lng-C-T  | 49  | chr2:131942450-131942550 |
| chr2 | 131951150 | 131951250 | 901-Lng-B-T  | 111 | chr2:131951150-131951250 |
| chr2 | 131962550 | 131962650 | 1065-Lng-A-T | 128 | chr2:131962550-131962650 |
| chr2 | 131973750 | 131973850 | 1065-Lng-C-T | 69  | chr2:131973750-131973850 |
| chr2 | 132127550 | 132127650 | 901-Lng-C-T  | 58  | chr2:132127550-132127650 |
| chr2 | 132216150 | 132216250 | 1065-Lng-C-T | 62  | chr2:132216150-132216250 |
| chr2 | 132289350 | 132289450 | 1072-Lng-A-T | 75  | chr2:132289350-132289450 |
| chr2 | 132362050 | 132362150 | 1065-Lng-A-T | 71  | chr2:132362050-132362150 |
| chr2 | 132497250 | 132497350 | 1090-Lng-A-T | 51  | chr2:132497250-132497350 |
| chr2 | 132748450 | 132748550 | 1100-Lng-B-T | 498 | chr2:132748450-132748550 |
| chr2 | 133455950 | 133456050 | 1167-Lng-A-T | 96  | chr2:133455950-133456050 |
| chr2 | 133941850 | 133941950 | 1065-Lng-B-T | 45  | chr2:133941850-133941950 |
| chr2 | 134092150 | 134092250 | 1274-Lng-A-T | 64  | chr2:134092150-134092250 |
| chr2 | 134157350 | 134157450 | 1065-Lng-C-T | 92  | chr2:134157350-134157450 |
| chr2 | 134161750 | 134161850 | 1167-Lng-A-T | 45  | chr2:134161750-134161850 |
| chr2 | 134170750 | 134170850 | 901-Lng-C-T  | 39  | chr2:134170750-134170850 |
| chr2 | 134177450 | 134177550 | 1065-Lng-A-T | 168 | chr2:134177450-134177550 |
| chr2 | 134222650 | 134222750 | 1065-Lng-A-T | 62  | chr2:134222650-134222750 |
| chr2 | 134533450 | 134533550 | 1072-Lng-A-T | 155 | chr2:134533450-134533550 |
| chr2 | 134879550 | 134879650 | 1223-Lng-B-T | 42  | chr2:134879550-134879650 |
| chr2 | 134916250 | 134916350 | 901-Lng-C-T  | 29  | chr2:134916250-134916350 |
| chr2 | 135615850 | 135615950 | 1090-Lng-A-T | 111 | chr2:135615850-135615950 |
| chr2 | 135679950 | 135680050 | 1065-Lng-B-T | 49  | chr2:135679950-135680050 |
| chr2 | 135689350 | 135689450 | 1072-Lng-A-T | 66  | chr2:135689350-135689450 |
| chr2 | 135996450 | 135996550 | 1072-Lng-A-T | 56  | chr2:135996450-135996550 |
| chr2 | 136038150 | 136038250 | 1100-Lng-A-T | 90  | chr2:136038150-136038250 |
| chr2 | 136161150 | 136161250 | 1274-Lng-A-T | 98  | chr2:136161150-136161250 |
| chr2 | 136366850 | 136366950 | 1223-Lng-C-T | 47  | chr2:136366850-136366950 |
| chr2 | 136373150 | 136373250 | 1188-Lng-A-T | 50  | chr2:136373150-136373250 |
| chr2 | 136738950 | 136739050 | 1152-Lng-A-T | 43  | chr2:136738950-136739050 |
| chr2 | 136774550 | 136774650 | 1167-Lng-A-T | 117 | chr2:136774550-136774650 |
| chr2 | 136786250 | 136786350 | 901-Lng-B-T  | 156 | chr2:136786250-136786350 |
| chr2 | 136882950 | 136883050 | 901-Lng-C-T  | 222 | chr2:136882950-136883050 |
| chr2 | 137454250 | 137454350 | 901-Lng-C-T  | 282 | chr2:137454250-137454350 |
| chr2 | 138159550 | 138159650 | 901-Lng-C-T  | 83  | chr2:138159550-138159650 |
| chr2 | 138193150 | 138193250 | 1223-Lng-C-T | 217 | chr2:138193150-138193250 |
| chr2 | 138371950 | 138372050 | 901-Lng-B-T  | 73  | chr2:138371950-138372050 |
| chr2 | 138410050 | 138410150 | 1274-Lng-A-T | 49  | chr2:138410050-138410150 |
| chr2 | 138602350 | 138602450 | 901-Lng-B-T  | 144 | chr2:138602350-138602450 |
| chr2 | 138603350 | 138603450 | 1151-Lng-A-T | 245 | chr2:138603350-138603450 |
| chr2 | 138920450 | 138920550 | 1223-Lng-B-T | 42  | chr2:138920450-138920550 |
| chr2 | 138930150 | 138930250 | 1223-Lng-B-T | 51  | chr2:138930150-138930250 |

**Table S2: SB Insertion regions**

|      |           |           |              |     |                          |
|------|-----------|-----------|--------------|-----|--------------------------|
| chr2 | 139357050 | 139357150 | 901-Lng-C-T  | 60  | chr2:139357050-139357150 |
| chr2 | 139454150 | 139454250 | 1065-Lng-B-T | 66  | chr2:139454150-139454250 |
| chr2 | 139633350 | 139633450 | 1065-Lng-A-T | 83  | chr2:139633350-139633450 |
| chr2 | 139752050 | 139752150 | 1065-Lng-A-T | 80  | chr2:139752050-139752150 |
| chr2 | 139773950 | 139774050 | 1004-Lng-A-T | 49  | chr2:139773950-139774050 |
| chr2 | 139811950 | 139812050 | 1188-Lng-A-T | 46  | chr2:139811950-139812050 |
| chr2 | 139846850 | 139846950 | 901-Lng-D-T  | 203 | chr2:139846850-139846950 |
| chr2 | 140080950 | 140081050 | 1065-Lng-C-T | 62  | chr2:140080950-140081050 |
| chr2 | 140502250 | 140502350 | 901-Lng-A-T  | 68  | chr2:140502250-140502350 |
| chr2 | 140641750 | 140641850 | 901-Lng-D-T  | 522 | chr2:140641750-140641850 |
| chr2 | 140811450 | 140811550 | 1274-Lng-A-T | 63  | chr2:140811450-140811550 |
| chr2 | 140813150 | 140813250 | 1090-Lng-A-T | 84  | chr2:140813150-140813250 |
| chr2 | 140910150 | 140910250 | 1065-Lng-A-T | 41  | chr2:140910150-140910250 |
| chr2 | 141124650 | 141124750 | 1274-Lng-A-T | 111 | chr2:141124650-141124750 |
| chr2 | 141167350 | 141167450 | 901-Lng-A-T  | 70  | chr2:141167350-141167450 |
| chr2 | 141173450 | 141173550 | 1072-Lng-A-T | 57  | chr2:141173450-141173550 |
| chr2 | 141191050 | 141191150 | 901-Lng-B-T  | 41  | chr2:141191050-141191150 |
| chr2 | 141249150 | 141249250 | 1152-Lng-A-T | 57  | chr2:141249150-141249250 |
| chr2 | 141317050 | 141317150 | 901-Lng-D-T  | 542 | chr2:141317050-141317150 |
| chr2 | 141942650 | 141942750 | 901-Lng-D-T  | 94  | chr2:141942650-141942750 |
| chr2 | 142492150 | 142492250 | 1090-Lng-A-T | 84  | chr2:142492150-142492250 |
| chr2 | 142570450 | 142570550 | 1223-Lng-A-T | 120 | chr2:142570450-142570550 |
| chr2 | 142592150 | 142592250 | 1223-Lng-C-T | 58  | chr2:142592150-142592250 |
| chr2 | 142623750 | 142623850 | 1274-Lng-A-T | 80  | chr2:142623750-142623850 |
| chr2 | 142767650 | 142767750 | 901-Lng-C-T  | 60  | chr2:142767650-142767750 |
| chr2 | 142792250 | 142792350 | 1223-Lng-D-T | 57  | chr2:142792250-142792350 |
| chr2 | 143282350 | 143282450 | 901-Lng-A-T  | 67  | chr2:143282350-143282450 |
| chr2 | 143333450 | 143333550 | 1072-Lng-A-T | 52  | chr2:143333450-143333550 |
| chr2 | 143737850 | 143737950 | 1004-Lng-A-T | 63  | chr2:143737850-143737950 |
| chr2 | 143777250 | 143777350 | 1100-Lng-A-T | 248 | chr2:143777250-143777350 |
| chr2 | 143812450 | 143812550 | 901-Lng-D-T  | 83  | chr2:143812450-143812550 |
| chr2 | 144078950 | 144079050 | 1274-Lng-A-T | 82  | chr2:144078950-144079050 |
| chr2 | 144088050 | 144088150 | 1188-Lng-A-T | 49  | chr2:144088050-144088150 |
| chr2 | 144093650 | 144093750 | 1072-Lng-A-T | 57  | chr2:144093650-144093750 |
| chr2 | 144391850 | 144391950 | 1223-Lng-A-T | 82  | chr2:144391850-144391950 |
| chr2 | 144392250 | 144392350 | 1004-Lng-A-T | 61  | chr2:144392250-144392350 |
| chr2 | 144397650 | 144397750 | 1065-Lng-B-T | 49  | chr2:144397650-144397750 |
| chr2 | 144631250 | 144631350 | 1167-Lng-A-T | 49  | chr2:144631250-144631350 |
| chr2 | 144707950 | 144708050 | 901-Lng-A-T  | 116 | chr2:144707950-144708050 |
| chr2 | 144714850 | 144714950 | 1223-Lng-B-T | 34  | chr2:144714850-144714950 |
| chr2 | 144721950 | 144722050 | 901-Lng-B-T  | 619 | chr2:144721950-144722050 |
| chr2 | 145164450 | 145164550 | 901-Lng-A-T  | 63  | chr2:145164450-145164550 |
| chr2 | 145182750 | 145182850 | 901-Lng-C-T  | 53  | chr2:145182750-145182850 |
| chr2 | 145438550 | 145438650 | 1065-Lng-C-T | 69  | chr2:145438550-145438650 |
| chr2 | 145456650 | 145456750 | 1223-Lng-A-T | 611 | chr2:145456650-145456750 |
| chr2 | 145546250 | 145546350 | 1223-Lng-C-T | 54  | chr2:145546250-145546350 |



**Table S2: SB Insertion regions**

|      |           |           |              |      |                          |
|------|-----------|-----------|--------------|------|--------------------------|
| chr2 | 145566750 | 145566850 | 1090-Lng-A-T | 58   | chr2:145566750-145566850 |
| chr2 | 145626550 | 145626650 | 1065-Lng-A-T | 530  | chr2:145626550-145626650 |
| chr2 | 145696550 | 145696650 | 1152-Lng-A-T | 45   | chr2:145696550-145696650 |
| chr2 | 145701450 | 145701550 | 1065-Lng-A-T | 74   | chr2:145701450-145701550 |
| chr2 | 145724050 | 145724150 | 1274-Lng-A-T | 58   | chr2:145724050-145724150 |
| chr2 | 145774650 | 145774750 | 1223-Lng-D-T | 43   | chr2:145774650-145774750 |
| chr2 | 145935850 | 145935950 | 901-Lng-D-T  | 44   | chr2:145935850-145935950 |
| chr2 | 145971950 | 145972050 | 1152-Lng-A-T | 47   | chr2:145971950-145972050 |
| chr2 | 146063850 | 146063950 | 1188-Lng-A-T | 41   | chr2:146063850-146063950 |
| chr2 | 146130850 | 146130950 | 1065-Lng-B-T | 73   | chr2:146130850-146130950 |
| chr2 | 146154950 | 146155050 | 1100-Lng-A-T | 1808 | chr2:146154950-146155050 |
| chr2 | 146165650 | 146165750 | 1223-Lng-D-T | 109  | chr2:146165650-146165750 |
| chr2 | 146188050 | 146188150 | 1167-Lng-A-T | 294  | chr2:146188050-146188150 |
| chr2 | 146205650 | 146205750 | 1274-Lng-A-T | 65   | chr2:146205650-146205750 |
| chr2 | 146272750 | 146272850 | 846-Lng-A-T  | 73   | chr2:146272750-146272850 |
| chr2 | 146307050 | 146307150 | 1100-Lng-A-T | 67   | chr2:146307050-146307150 |
| chr2 | 146310050 | 146310150 | 1090-Lng-B-T | 180  | chr2:146310050-146310150 |
| chr2 | 146332450 | 146332550 | 1065-Lng-A-T | 53   | chr2:146332450-146332550 |
| chr2 | 146523950 | 146524050 | 1065-Lng-C-T | 61   | chr2:146523950-146524050 |
| chr2 | 146841950 | 146842050 | 1090-Lng-A-T | 63   | chr2:146841950-146842050 |
| chr2 | 146847950 | 146848050 | 1274-Lng-A-T | 86   | chr2:146847950-146848050 |
| chr2 | 146852250 | 146852350 | 1188-Lng-A-T | 403  | chr2:146852250-146852350 |
| chr2 | 146882650 | 146882750 | 1223-Lng-B-T | 115  | chr2:146882650-146882750 |
| chr2 | 146902850 | 146902950 | 1274-Lng-A-T | 116  | chr2:146902850-146902950 |
| chr2 | 146991950 | 146992050 | 1065-Lng-B-T | 66   | chr2:146991950-146992050 |
| chr2 | 147005450 | 147005550 | 1188-Lng-A-T | 69   | chr2:147005450-147005550 |
| chr2 | 147563750 | 147563850 | 1274-Lng-A-T | 59   | chr2:147563750-147563850 |
| chr2 | 147579350 | 147579450 | 1274-Lng-A-T | 55   | chr2:147579350-147579450 |
| chr2 | 147638250 | 147638350 | 1167-Lng-A-T | 67   | chr2:147638250-147638350 |
| chr2 | 147740650 | 147740750 | 1223-Lng-D-T | 55   | chr2:147740650-147740750 |
| chr2 | 147757550 | 147757650 | 1188-Lng-A-T | 220  | chr2:147757550-147757650 |
| chr2 | 147782350 | 147782450 | 1100-Lng-A-T | 574  | chr2:147782350-147782450 |
| chr2 | 147800050 | 147800150 | 1100-Lng-A-T | 479  | chr2:147800050-147800150 |
| chr2 | 147854550 | 147854650 | 1223-Lng-C-T | 514  | chr2:147854550-147854650 |
| chr2 | 147862150 | 147862250 | 1151-Lng-A-T | 86   | chr2:147862150-147862250 |
| chr2 | 147873550 | 147873650 | 1151-Lng-A-T | 58   | chr2:147873550-147873650 |
| chr2 | 147973250 | 147973350 | 1152-Lng-A-T | 84   | chr2:147973250-147973350 |
| chr2 | 148304350 | 148304450 | 1223-Lng-B-T | 65   | chr2:148304350-148304450 |
| chr2 | 148306550 | 148306650 | 1065-Lng-A-T | 202  | chr2:148306550-148306650 |
| chr2 | 148469150 | 148469250 | 1090-Lng-A-T | 74   | chr2:148469150-148469250 |
| chr2 | 148477550 | 148477650 | 901-Lng-D-T  | 419  | chr2:148477550-148477650 |
| chr2 | 148499150 | 148499250 | 1223-Lng-D-T | 77   | chr2:148499150-148499250 |
| chr2 | 148517750 | 148517850 | 1223-Lng-D-T | 48   | chr2:148517750-148517850 |
| chr2 | 148554450 | 148554550 | 901-Lng-B-T  | 691  | chr2:148554450-148554550 |
| chr2 | 148844150 | 148844250 | 1223-Lng-A-T | 66   | chr2:148844150-148844250 |
| chr2 | 148844150 | 148844250 | 1223-Lng-B-T | 54   | chr2:148844150-148844250 |

**Table S2: SB Insertion regions**

|      |           |           |              |      |                          |
|------|-----------|-----------|--------------|------|--------------------------|
| chr2 | 149276350 | 149276450 | 901-Lng-C-T  | 44   | chr2:149276350-149276450 |
| chr2 | 149484850 | 149484950 | 1065-Lng-C-T | 76   | chr2:149484850-149484950 |
| chr2 | 149488650 | 149488750 | 1167-Lng-A-T | 62   | chr2:149488650-149488750 |
| chr2 | 149729150 | 149729250 | 1274-Lng-A-T | 100  | chr2:149729150-149729250 |
| chr2 | 149815950 | 149816050 | 1223-Lng-A-T | 167  | chr2:149815950-149816050 |
| chr2 | 149818650 | 149818750 | 1274-Lng-A-T | 186  | chr2:149818650-149818750 |
| chr2 | 149877050 | 149877150 | 1065-Lng-A-T | 41   | chr2:149877050-149877150 |
| chr2 | 150172750 | 150172850 | 1223-Lng-C-T | 54   | chr2:150172750-150172850 |
| chr2 | 150233450 | 150233550 | 1065-Lng-A-T | 42   | chr2:150233450-150233550 |
| chr2 | 150467350 | 150467450 | 1167-Lng-A-T | 267  | chr2:150467350-150467450 |
| chr2 | 150479250 | 150479350 | 1090-Lng-A-T | 65   | chr2:150479250-150479350 |
| chr2 | 150496250 | 150496350 | 1151-Lng-A-T | 69   | chr2:150496250-150496350 |
| chr2 | 150575850 | 150575950 | 846-Lng-A-T  | 102  | chr2:150575850-150575950 |
| chr2 | 150593650 | 150593750 | 901-Lng-C-T  | 56   | chr2:150593650-150593750 |
| chr2 | 150608050 | 150608150 | 1065-Lng-A-T | 60   | chr2:150608050-150608150 |
| chr2 | 150766650 | 150766750 | 1223-Lng-B-T | 46   | chr2:150766650-150766750 |
| chr2 | 150854050 | 150854150 | 901-Lng-D-T  | 96   | chr2:150854050-150854150 |
| chr2 | 151260150 | 151260250 | 1065-Lng-A-T | 101  | chr2:151260150-151260250 |
| chr2 | 151319550 | 151319650 | 1090-Lng-A-T | 2295 | chr2:151319550-151319650 |
| chr2 | 151330950 | 151331050 | 1274-Lng-A-T | 262  | chr2:151330950-151331050 |
| chr2 | 151375350 | 151375450 | 1223-Lng-D-T | 51   | chr2:151375350-151375450 |
| chr2 | 151386550 | 151386650 | 1152-Lng-A-T | 92   | chr2:151386550-151386650 |
| chr2 | 152014650 | 152014750 | 1223-Lng-B-T | 61   | chr2:152014650-152014750 |
| chr2 | 152059850 | 152059950 | 901-Lng-B-T  | 205  | chr2:152059850-152059950 |
| chr2 | 152077450 | 152077550 | 846-Lng-A-T  | 52   | chr2:152077450-152077550 |
| chr2 | 152116350 | 152116450 | 1065-Lng-C-T | 93   | chr2:152116350-152116450 |
| chr2 | 152122150 | 152122250 | 1151-Lng-A-T | 239  | chr2:152122150-152122250 |
| chr2 | 152124550 | 152124650 | 1223-Lng-A-T | 378  | chr2:152124550-152124650 |
| chr2 | 152130150 | 152130250 | 1274-Lng-A-T | 120  | chr2:152130150-152130250 |
| chr2 | 152130750 | 152130850 | 901-Lng-D-T  | 122  | chr2:152130750-152130850 |
| chr2 | 152150950 | 152151050 | 901-Lng-D-T  | 120  | chr2:152150950-152151050 |
| chr2 | 152206850 | 152206950 | 846-Lng-A-T  | 142  | chr2:152206850-152206950 |
| chr2 | 152625850 | 152625950 | 1152-Lng-A-T | 338  | chr2:152625850-152625950 |
| chr2 | 152638250 | 152638350 | 1065-Lng-A-T | 42   | chr2:152638250-152638350 |
| chr2 | 152795350 | 152795450 | 1274-Lng-A-T | 133  | chr2:152795350-152795450 |
| chr2 | 152964750 | 152964850 | 1090-Lng-A-T | 117  | chr2:152964750-152964850 |
| chr2 | 153070650 | 153070750 | 901-Lng-A-T  | 57   | chr2:153070650-153070750 |
| chr2 | 153112750 | 153112850 | 1090-Lng-A-T | 111  | chr2:153112750-153112850 |
| chr2 | 153167850 | 153167950 | 1065-Lng-C-T | 68   | chr2:153167850-153167950 |
| chr2 | 153214850 | 153214950 | 1100-Lng-A-T | 113  | chr2:153214850-153214950 |
| chr2 | 153239350 | 153239450 | 1065-Lng-B-T | 41   | chr2:153239350-153239450 |
| chr2 | 153466250 | 153466350 | 1223-Lng-B-T | 38   | chr2:153466250-153466350 |
| chr2 | 153565150 | 153565250 | 1167-Lng-A-T | 53   | chr2:153565150-153565250 |
| chr2 | 153700150 | 153700250 | 1065-Lng-A-T | 74   | chr2:153700150-153700250 |
| chr2 | 154113450 | 154113550 | 1167-Lng-A-T | 70   | chr2:154113450-154113550 |
| chr2 | 154156150 | 154156250 | 901-Lng-D-T  | 41   | chr2:154156150-154156250 |

**Table S2: SB Insertion regions**

|      |           |           |              |       |                          |
|------|-----------|-----------|--------------|-------|--------------------------|
| chr2 | 154510750 | 154510850 | 1100-Lng-A-T | 69    | chr2:154510750-154510850 |
| chr2 | 154638450 | 154638550 | 1065-Lng-A-T | 48    | chr2:154638450-154638550 |
| chr2 | 154642150 | 154642250 | 1151-Lng-A-T | 76    | chr2:154642150-154642250 |
| chr2 | 154912350 | 154912450 | 1065-Lng-B-T | 116   | chr2:154912350-154912450 |
| chr2 | 154960550 | 154960650 | 1223-Lng-D-T | 188   | chr2:154960550-154960650 |
| chr2 | 154960550 | 154960650 | 1100-Lng-A-T | 172   | chr2:154960550-154960650 |
| chr2 | 155032250 | 155032350 | 1090-Lng-A-T | 59    | chr2:155032250-155032350 |
| chr2 | 155121950 | 155122050 | 1065-Lng-A-T | 138   | chr2:155121950-155122050 |
| chr2 | 155136050 | 155136150 | 1223-Lng-B-T | 35    | chr2:155136050-155136150 |
| chr2 | 155164550 | 155164650 | 1152-Lng-A-T | 53    | chr2:155164550-155164650 |
| chr2 | 155200550 | 155200650 | 1151-Lng-A-T | 73    | chr2:155200550-155200650 |
| chr2 | 155215150 | 155215250 | 1100-Lng-A-T | 58    | chr2:155215150-155215250 |
| chr2 | 155237650 | 155237750 | 846-Lng-A-T  | 1227  | chr2:155237650-155237750 |
| chr2 | 155246250 | 155246350 | 1065-Lng-B-T | 96    | chr2:155246250-155246350 |
| chr2 | 155293850 | 155293950 | 1065-Lng-B-T | 135   | chr2:155293850-155293950 |
| chr2 | 155346750 | 155346850 | 1090-Lng-A-T | 77    | chr2:155346750-155346850 |
| chr2 | 155351150 | 155351250 | 1152-Lng-A-T | 70    | chr2:155351150-155351250 |
| chr2 | 155385550 | 155385650 | 901-Lng-A-T  | 79    | chr2:155385550-155385650 |
| chr2 | 155462650 | 155462750 | 1152-Lng-A-T | 62    | chr2:155462650-155462750 |
| chr2 | 155473950 | 155474050 | 1072-Lng-A-T | 61    | chr2:155473950-155474050 |
| chr2 | 155483850 | 155483950 | 1223-Lng-C-T | 142   | chr2:155483850-155483950 |
| chr2 | 155503350 | 155503450 | 1223-Lng-B-T | 215   | chr2:155503350-155503450 |
| chr2 | 155511750 | 155511850 | 1188-Lng-A-T | 52    | chr2:155511750-155511850 |
| chr2 | 155511850 | 155511950 | 1223-Lng-D-T | 42    | chr2:155511850-155511950 |
| chr2 | 155511950 | 155512050 | 1151-Lng-A-T | 154   | chr2:155511950-155512050 |
| chr2 | 155535550 | 155535650 | 1152-Lng-A-T | 32    | chr2:155535550-155535650 |
| chr2 | 155588450 | 155588550 | 1100-Lng-A-T | 85    | chr2:155588450-155588550 |
| chr2 | 155720750 | 155720850 | 901-Lng-C-T  | 62    | chr2:155720750-155720850 |
| chr2 | 155735550 | 155735650 | 1072-Lng-A-T | 221   | chr2:155735550-155735650 |
| chr2 | 155753050 | 155753150 | 1065-Lng-C-T | 68    | chr2:155753050-155753150 |
| chr2 | 155934850 | 155934950 | 1223-Lng-C-T | 100   | chr2:155934850-155934950 |
| chr2 | 156003450 | 156003550 | 1152-Lng-A-T | 34    | chr2:156003450-156003550 |
| chr2 | 156057350 | 156057450 | 901-Lng-B-T  | 179   | chr2:156057350-156057450 |
| chr2 | 156082350 | 156082450 | 1100-Lng-B-T | 13120 | chr2:156082350-156082450 |
| chr2 | 156133150 | 156133250 | 1274-Lng-A-T | 63    | chr2:156133150-156133250 |
| chr2 | 156364250 | 156364350 | 1100-Lng-A-T | 350   | chr2:156364250-156364350 |
| chr2 | 156699950 | 156700050 | 901-Lng-B-T  | 146   | chr2:156699950-156700050 |
| chr2 | 156773750 | 156773850 | 1167-Lng-A-T | 92    | chr2:156773750-156773850 |
| chr2 | 156793250 | 156793350 | 1188-Lng-A-T | 84    | chr2:156793250-156793350 |
| chr2 | 156918350 | 156918450 | 1065-Lng-A-T | 42    | chr2:156918350-156918450 |
| chr2 | 157011250 | 157011350 | 1090-Lng-B-T | 1032  | chr2:157011250-157011350 |
| chr2 | 157252350 | 157252450 | 1188-Lng-A-T | 71    | chr2:157252350-157252450 |
| chr2 | 157280150 | 157280250 | 846-Lng-A-T  | 96    | chr2:157280150-157280250 |
| chr2 | 157321650 | 157321750 | 1090-Lng-B-T | 393   | chr2:157321650-157321750 |
| chr2 | 157578150 | 157578250 | 1100-Lng-A-T | 119   | chr2:157578150-157578250 |
| chr2 | 157580250 | 157580350 | 1100-Lng-B-T | 2908  | chr2:157580250-157580350 |

**Table S2: SB Insertion regions**

|      |           |           |              |      |                          |
|------|-----------|-----------|--------------|------|--------------------------|
| chr2 | 157603450 | 157603550 | 1223-Lng-A-T | 201  | chr2:157603450-157603550 |
| chr2 | 157641850 | 157641950 | 1167-Lng-A-T | 55   | chr2:157641850-157641950 |
| chr2 | 157826550 | 157826650 | 1065-Lng-B-T | 70   | chr2:157826550-157826650 |
| chr2 | 157866650 | 157866750 | 1274-Lng-A-T | 102  | chr2:157866650-157866750 |
| chr2 | 157981650 | 157981750 | 1072-Lng-A-T | 172  | chr2:157981650-157981750 |
| chr2 | 158047950 | 158048050 | 901-Lng-A-T  | 73   | chr2:158047950-158048050 |
| chr2 | 158961250 | 158961350 | 1151-Lng-A-T | 145  | chr2:158961250-158961350 |
| chr2 | 159131750 | 159131850 | 901-Lng-D-T  | 278  | chr2:159131750-159131850 |
| chr2 | 159187350 | 159187450 | 901-Lng-C-T  | 310  | chr2:159187350-159187450 |
| chr2 | 159375150 | 159375250 | 1065-Lng-B-T | 65   | chr2:159375150-159375250 |
| chr2 | 159526950 | 159527050 | 1223-Lng-C-T | 54   | chr2:159526950-159527050 |
| chr2 | 159913950 | 159914050 | 846-Lng-A-T  | 135  | chr2:159913950-159914050 |
| chr2 | 160125450 | 160125550 | 901-Lng-C-T  | 30   | chr2:160125450-160125550 |
| chr2 | 160231050 | 160231150 | 1004-Lng-A-T | 60   | chr2:160231050-160231150 |
| chr2 | 160300550 | 160300650 | 1065-Lng-A-T | 91   | chr2:160300550-160300650 |
| chr2 | 160516450 | 160516550 | 1072-Lng-A-T | 61   | chr2:160516450-160516550 |
| chr2 | 160538550 | 160538650 | 901-Lng-A-T  | 115  | chr2:160538550-160538650 |
| chr2 | 160546050 | 160546150 | 1152-Lng-A-T | 374  | chr2:160546050-160546150 |
| chr2 | 160553050 | 160553150 | 846-Lng-A-T  | 195  | chr2:160553050-160553150 |
| chr2 | 160664750 | 160664850 | 1223-Lng-D-T | 49   | chr2:160664750-160664850 |
| chr2 | 160780850 | 160780950 | 901-Lng-C-T  | 31   | chr2:160780850-160780950 |
| chr2 | 160832350 | 160832450 | 1100-Lng-A-T | 85   | chr2:160832350-160832450 |
| chr2 | 160836750 | 160836850 | 1090-Lng-A-T | 50   | chr2:160836750-160836850 |
| chr2 | 160861650 | 160861750 | 1100-Lng-A-T | 59   | chr2:160861650-160861750 |
| chr2 | 160879850 | 160879950 | 1274-Lng-A-T | 81   | chr2:160879850-160879950 |
| chr2 | 160880050 | 160880150 | 1274-Lng-A-T | 114  | chr2:160880050-160880150 |
| chr2 | 160898550 | 160898650 | 1004-Lng-A-T | 161  | chr2:160898550-160898650 |
| chr2 | 160912350 | 160912450 | 1090-Lng-A-T | 45   | chr2:160912350-160912450 |
| chr2 | 161079750 | 161079850 | 1223-Lng-C-T | 55   | chr2:161079750-161079850 |
| chr2 | 161111350 | 161111450 | 1065-Lng-A-T | 75   | chr2:161111350-161111450 |
| chr2 | 161169550 | 161169650 | 1151-Lng-A-T | 87   | chr2:161169550-161169650 |
| chr2 | 161248250 | 161248350 | 1223-Lng-A-T | 190  | chr2:161248250-161248350 |
| chr2 | 161361850 | 161361950 | 1223-Lng-B-T | 204  | chr2:161361850-161361950 |
| chr2 | 161423950 | 161424050 | 1072-Lng-A-T | 60   | chr2:161423950-161424050 |
| chr2 | 161453850 | 161453950 | 1223-Lng-D-T | 42   | chr2:161453850-161453950 |
| chr2 | 161608550 | 161608650 | 1223-Lng-B-T | 38   | chr2:161608550-161608650 |
| chr2 | 161791150 | 161791250 | 1065-Lng-B-T | 190  | chr2:161791150-161791250 |
| chr2 | 162045050 | 162045150 | 901-Lng-C-T  | 214  | chr2:162045050-162045150 |
| chr2 | 162314750 | 162314850 | 1004-Lng-A-T | 51   | chr2:162314750-162314850 |
| chr2 | 162326250 | 162326350 | 1188-Lng-A-T | 38   | chr2:162326250-162326350 |
| chr2 | 162846550 | 162846650 | 1188-Lng-A-T | 148  | chr2:162846550-162846650 |
| chr2 | 163293150 | 163293250 | 1100-Lng-A-T | 57   | chr2:163293150-163293250 |
| chr2 | 163458950 | 163459050 | 901-Lng-A-T  | 71   | chr2:163458950-163459050 |
| chr2 | 163461850 | 163461950 | 1152-Lng-A-T | 168  | chr2:163461850-163461950 |
| chr2 | 163468350 | 163468450 | 1151-Lng-A-T | 1217 | chr2:163468350-163468450 |
| chr2 | 163468350 | 163468450 | 901-Lng-D-T  | 39   | chr2:163468350-163468450 |

**Table S2: SB Insertion regions**

|      |           |           |              |      |                          |
|------|-----------|-----------|--------------|------|--------------------------|
| chr2 | 163468350 | 163468450 | 1090-Lng-A-T | 135  | chr2:163468350-163468450 |
| chr2 | 163468350 | 163468450 | 1090-Lng-B-T | 4837 | chr2:163468350-163468450 |
| chr2 | 163468350 | 163468450 | 1223-Lng-D-T | 56   | chr2:163468350-163468450 |
| chr2 | 163468350 | 163468450 | 1100-Lng-A-T | 2674 | chr2:163468350-163468450 |
| chr2 | 163468350 | 163468450 | 1065-Lng-A-T | 304  | chr2:163468350-163468450 |
| chr2 | 163468350 | 163468450 | 1152-Lng-A-T | 941  | chr2:163468350-163468450 |
| chr2 | 163468350 | 163468450 | 1065-Lng-B-T | 201  | chr2:163468350-163468450 |
| chr2 | 163468350 | 163468450 | 1100-Lng-B-T | 273  | chr2:163468350-163468450 |
| chr2 | 163468350 | 163468450 | 1188-Lng-A-T | 335  | chr2:163468350-163468450 |
| chr2 | 163468350 | 163468450 | 1090-Lng-A-T | 2794 | chr2:163468350-163468450 |
| chr2 | 163468350 | 163468450 | 1223-Lng-B-T | 323  | chr2:163468350-163468450 |
| chr2 | 163468350 | 163468450 | 846-Lng-A-T  | 977  | chr2:163468350-163468450 |
| chr2 | 163468350 | 163468450 | 1223-Lng-A-T | 2258 | chr2:163468350-163468450 |
| chr2 | 163468350 | 163468450 | 1223-Lng-D-T | 1175 | chr2:163468350-163468450 |
| chr2 | 163468350 | 163468450 | 1090-Lng-B-T | 168  | chr2:163468350-163468450 |
| chr2 | 163468350 | 163468450 | 1167-Lng-A-T | 898  | chr2:163468350-163468450 |
| chr2 | 163468350 | 163468450 | 1100-Lng-A-T | 80   | chr2:163468350-163468450 |
| chr2 | 163468350 | 163468450 | 1072-Lng-A-T | 51   | chr2:163468350-163468450 |
| chr2 | 163468350 | 163468450 | 1274-Lng-A-T | 1644 | chr2:163468350-163468450 |
| chr2 | 163468350 | 163468450 | 901-Lng-C-T  | 171  | chr2:163468350-163468450 |
| chr2 | 163468350 | 163468450 | 1223-Lng-C-T | 1066 | chr2:163468350-163468450 |
| chr2 | 163468450 | 163468550 | 1223-Lng-B-T | 382  | chr2:163468450-163468550 |
| chr2 | 163468450 | 163468550 | 1223-Lng-D-T | 447  | chr2:163468450-163468550 |
| chr2 | 163468450 | 163468550 | 1167-Lng-A-T | 595  | chr2:163468450-163468550 |
| chr2 | 163468450 | 163468550 | 1274-Lng-A-T | 756  | chr2:163468450-163468550 |
| chr2 | 163468450 | 163468550 | 1223-Lng-C-T | 392  | chr2:163468450-163468550 |
| chr2 | 163468450 | 163468550 | 1151-Lng-A-T | 563  | chr2:163468450-163468550 |
| chr2 | 163468450 | 163468550 | 1090-Lng-B-T | 5388 | chr2:163468450-163468550 |
| chr2 | 163468450 | 163468550 | 1100-Lng-A-T | 1112 | chr2:163468450-163468550 |
| chr2 | 163468450 | 163468550 | 1065-Lng-A-T | 429  | chr2:163468450-163468550 |
| chr2 | 163468450 | 163468550 | 1152-Lng-A-T | 483  | chr2:163468450-163468550 |
| chr2 | 163468450 | 163468550 | 1100-Lng-B-T | 63   | chr2:163468450-163468550 |
| chr2 | 163468450 | 163468550 | 1090-Lng-A-T | 1749 | chr2:163468450-163468550 |
| chr2 | 163468650 | 163468750 | 1223-Lng-A-T | 578  | chr2:163468650-163468750 |
| chr2 | 163468650 | 163468750 | 1100-Lng-A-T | 256  | chr2:163468650-163468750 |
| chr2 | 163468650 | 163468750 | 1223-Lng-B-T | 59   | chr2:163468650-163468750 |
| chr2 | 163468650 | 163468750 | 1223-Lng-D-T | 74   | chr2:163468650-163468750 |
| chr2 | 163468650 | 163468750 | 1274-Lng-A-T | 67   | chr2:163468650-163468750 |
| chr2 | 163468650 | 163468750 | 1188-Lng-A-T | 109  | chr2:163468650-163468750 |
| chr2 | 163840050 | 163840150 | 1188-Lng-A-T | 210  | chr2:163840050-163840150 |
| chr2 | 163893550 | 163893650 | 1274-Lng-A-T | 60   | chr2:163893550-163893650 |
| chr2 | 163955850 | 163955950 | 1274-Lng-A-T | 198  | chr2:163955850-163955950 |
| chr2 | 163989450 | 163989550 | 1090-Lng-A-T | 46   | chr2:163989450-163989550 |
| chr2 | 164096050 | 164096150 | 1065-Lng-A-T | 49   | chr2:164096050-164096150 |
| chr2 | 164259050 | 164259150 | 1065-Lng-C-T | 1821 | chr2:164259050-164259150 |
| chr2 | 164842350 | 164842450 | 1004-Lng-A-T | 66   | chr2:164842350-164842450 |

**Table S2: SB Insertion regions**

|      |           |           |              |      |                          |
|------|-----------|-----------|--------------|------|--------------------------|
| chr2 | 165330550 | 165330650 | 1152-Lng-A-T | 38   | chr2:165330550-165330650 |
| chr2 | 165468650 | 165468750 | 901-Lng-C-T  | 433  | chr2:165468650-165468750 |
| chr2 | 165493950 | 165494050 | 901-Lng-D-T  | 152  | chr2:165493950-165494050 |
| chr2 | 165496450 | 165496550 | 1223-Lng-B-T | 50   | chr2:165496450-165496550 |
| chr2 | 165639250 | 165639350 | 1100-Lng-A-T | 89   | chr2:165639250-165639350 |
| chr2 | 165822050 | 165822150 | 1167-Lng-A-T | 111  | chr2:165822050-165822150 |
| chr2 | 165828550 | 165828650 | 846-Lng-A-T  | 89   | chr2:165828550-165828650 |
| chr2 | 165870650 | 165870750 | 846-Lng-A-T  | 822  | chr2:165870650-165870750 |
| chr2 | 166507350 | 166507450 | 901-Lng-A-T  | 79   | chr2:166507350-166507450 |
| chr2 | 166671250 | 166671350 | 1188-Lng-A-T | 71   | chr2:166671250-166671350 |
| chr2 | 166776050 | 166776150 | 1090-Lng-B-T | 160  | chr2:166776050-166776150 |
| chr2 | 166847850 | 166847950 | 901-Lng-C-T  | 73   | chr2:166847850-166847950 |
| chr2 | 166890250 | 166890350 | 1151-Lng-A-T | 199  | chr2:166890250-166890350 |
| chr2 | 167129850 | 167129950 | 1100-Lng-B-T | 345  | chr2:167129850-167129950 |
| chr2 | 167172550 | 167172650 | 1004-Lng-A-T | 91   | chr2:167172550-167172650 |
| chr2 | 167258650 | 167258750 | 1065-Lng-C-T | 100  | chr2:167258650-167258750 |
| chr2 | 167261950 | 167262050 | 901-Lng-B-T  | 96   | chr2:167261950-167262050 |
| chr2 | 167314850 | 167314950 | 901-Lng-A-T  | 108  | chr2:167314850-167314950 |
| chr2 | 167503150 | 167503250 | 1065-Lng-A-T | 43   | chr2:167503150-167503250 |
| chr2 | 167652250 | 167652350 | 1100-Lng-A-T | 176  | chr2:167652250-167652350 |
| chr2 | 167747450 | 167747550 | 1065-Lng-A-T | 49   | chr2:167747450-167747550 |
| chr2 | 168050950 | 168051050 | 1072-Lng-A-T | 203  | chr2:168050950-168051050 |
| chr2 | 168523150 | 168523250 | 901-Lng-A-T  | 70   | chr2:168523150-168523250 |
| chr2 | 169070150 | 169070250 | 1090-Lng-B-T | 1106 | chr2:169070150-169070250 |
| chr2 | 169288750 | 169288850 | 1188-Lng-A-T | 62   | chr2:169288750-169288850 |
| chr2 | 169952050 | 169952150 | 1151-Lng-A-T | 385  | chr2:169952050-169952150 |
| chr2 | 169973350 | 169973450 | 1223-Lng-B-T | 46   | chr2:169973350-169973450 |
| chr2 | 169978250 | 169978350 | 1090-Lng-A-T | 57   | chr2:169978250-169978350 |
| chr2 | 170052150 | 170052250 | 901-Lng-D-T  | 77   | chr2:170052150-170052250 |
| chr2 | 170067750 | 170067850 | 846-Lng-A-T  | 190  | chr2:170067750-170067850 |
| chr2 | 170179550 | 170179650 | 1065-Lng-C-T | 180  | chr2:170179550-170179650 |
| chr2 | 170536850 | 170536950 | 1065-Lng-A-T | 95   | chr2:170536850-170536950 |
| chr2 | 171898950 | 171899050 | 1065-Lng-A-T | 63   | chr2:171898950-171899050 |
| chr2 | 172632750 | 172632850 | 901-Lng-A-T  | 61   | chr2:172632750-172632850 |
| chr2 | 173519750 | 173519850 | 1065-Lng-B-T | 62   | chr2:173519750-173519850 |
| chr2 | 173523650 | 173523750 | 1100-Lng-A-T | 71   | chr2:173523650-173523750 |
| chr2 | 173589450 | 173589550 | 1152-Lng-A-T | 102  | chr2:173589450-173589550 |
| chr2 | 173610550 | 173610650 | 1223-Lng-A-T | 521  | chr2:173610550-173610650 |
| chr2 | 173614350 | 173614450 | 846-Lng-A-T  | 109  | chr2:173614350-173614450 |
| chr2 | 173765150 | 173765250 | 1223-Lng-C-T | 43   | chr2:173765150-173765250 |
| chr2 | 173899250 | 173899350 | 1223-Lng-C-T | 50   | chr2:173899250-173899350 |
| chr2 | 174223650 | 174223750 | 901-Lng-B-T  | 85   | chr2:174223650-174223750 |
| chr2 | 174240350 | 174240450 | 1167-Lng-A-T | 64   | chr2:174240350-174240450 |
| chr2 | 174304550 | 174304650 | 1223-Lng-C-T | 48   | chr2:174304550-174304650 |
| chr2 | 174534550 | 174534650 | 901-Lng-A-T  | 59   | chr2:174534550-174534650 |
| chr2 | 174993650 | 174993750 | 1152-Lng-A-T | 207  | chr2:174993650-174993750 |

**Table S2: SB Insertion regions**

|      |           |           |              |     |                          |
|------|-----------|-----------|--------------|-----|--------------------------|
| chr2 | 177125750 | 177125850 | 1223-Lng-A-T | 659 | chr2:177125750-177125850 |
| chr2 | 177561350 | 177561450 | 1065-Lng-A-T | 53  | chr2:177561350-177561450 |
| chr2 | 177894450 | 177894550 | 846-Lng-A-T  | 178 | chr2:177894450-177894550 |
| chr2 | 177914550 | 177914650 | 1090-Lng-A-T | 96  | chr2:177914550-177914650 |
| chr2 | 178361950 | 178362050 | 1065-Lng-C-T | 70  | chr2:178361950-178362050 |
| chr2 | 178382350 | 178382450 | 1188-Lng-A-T | 34  | chr2:178382350-178382450 |
| chr2 | 179272550 | 179272650 | 1065-Lng-A-T | 44  | chr2:179272550-179272650 |
| chr2 | 179435150 | 179435250 | 1004-Lng-A-T | 49  | chr2:179435150-179435250 |
| chr2 | 179642450 | 179642550 | 1274-Lng-A-T | 54  | chr2:179642450-179642550 |
| chr2 | 179663350 | 179663450 | 901-Lng-B-T  | 61  | chr2:179663350-179663450 |
| chr2 | 179702750 | 179702850 | 1274-Lng-A-T | 174 | chr2:179702750-179702850 |
| chr2 | 179839350 | 179839450 | 1072-Lng-A-T | 59  | chr2:179839350-179839450 |
| chr2 | 179893650 | 179893750 | 1072-Lng-A-T | 69  | chr2:179893650-179893750 |
| chr2 | 179893950 | 179894050 | 1090-Lng-B-T | 65  | chr2:179893950-179894050 |
| chr2 | 179910950 | 179911050 | 1151-Lng-A-T | 196 | chr2:179910950-179911050 |
| chr2 | 179942250 | 179942350 | 1100-Lng-A-T | 70  | chr2:179942250-179942350 |
| chr2 | 179945350 | 179945450 | 1100-Lng-A-T | 73  | chr2:179945350-179945450 |
| chr2 | 180283650 | 180283750 | 1090-Lng-A-T | 59  | chr2:180283650-180283750 |
| chr2 | 180412250 | 180412350 | 1100-Lng-A-T | 97  | chr2:180412250-180412350 |
| chr2 | 180463750 | 180463850 | 1065-Lng-B-T | 78  | chr2:180463750-180463850 |
| chr2 | 180705250 | 180705350 | 1100-Lng-A-T | 320 | chr2:180705250-180705350 |
| chr2 | 180802550 | 180802650 | 1151-Lng-A-T | 415 | chr2:180802550-180802650 |
| chr2 | 180815150 | 180815250 | 846-Lng-A-T  | 84  | chr2:180815150-180815250 |
| chr2 | 180947750 | 180947850 | 1100-Lng-A-T | 88  | chr2:180947750-180947850 |
| chr2 | 180949250 | 180949350 | 1072-Lng-A-T | 69  | chr2:180949250-180949350 |
| chr2 | 180980950 | 180981050 | 1223-Lng-C-T | 49  | chr2:180980950-180981050 |
| chr2 | 181105050 | 181105150 | 1223-Lng-A-T | 92  | chr2:181105050-181105150 |
| chr2 | 181201150 | 181201250 | 1167-Lng-A-T | 101 | chr2:181201150-181201250 |
| chr2 | 181253650 | 181253750 | 1100-Lng-A-T | 141 | chr2:181253650-181253750 |
| chr2 | 181352950 | 181353050 | 1274-Lng-A-T | 56  | chr2:181352950-181353050 |
| chr2 | 181361650 | 181361750 | 901-Lng-B-T  | 153 | chr2:181361650-181361750 |
| chr2 | 181371550 | 181371650 | 1100-Lng-A-T | 77  | chr2:181371550-181371650 |
| chr2 | 181399550 | 181399650 | 1151-Lng-A-T | 102 | chr2:181399550-181399650 |
| chr2 | 181652350 | 181652450 | 901-Lng-D-T  | 518 | chr2:181652350-181652450 |
| chr3 | 3265950   | 3266050   | 1167-Lng-A-T | 48  | chr3:3265950-3266050     |
| chr3 | 3324250   | 3324350   | 901-Lng-C-T  | 35  | chr3:3324250-3324350     |
| chr3 | 3786650   | 3786750   | 1152-Lng-A-T | 133 | chr3:3786650-3786750     |
| chr3 | 3990450   | 3990550   | 901-Lng-A-T  | 98  | chr3:3990450-3990550     |
| chr3 | 4317050   | 4317150   | 1274-Lng-A-T | 66  | chr3:4317050-4317150     |
| chr3 | 4479750   | 4479850   | 1223-Lng-A-T | 122 | chr3:4479750-4479850     |
| chr3 | 4559850   | 4559950   | 1090-Lng-A-T | 937 | chr3:4559850-4559950     |
| chr3 | 5305750   | 5305850   | 1223-Lng-A-T | 676 | chr3:5305750-5305850     |
| chr3 | 5410550   | 5410650   | 901-Lng-C-T  | 41  | chr3:5410550-5410650     |
| chr3 | 5458850   | 5458950   | 1188-Lng-A-T | 34  | chr3:5458850-5458950     |
| chr3 | 5470050   | 5470150   | 1223-Lng-B-T | 191 | chr3:5470050-5470150     |
| chr3 | 5508550   | 5508650   | 1090-Lng-B-T | 671 | chr3:5508550-5508650     |

**Table S2: SB Insertion regions**

|      |         |         |              |     |                      |
|------|---------|---------|--------------|-----|----------------------|
| chr3 | 5532250 | 5532350 | 1072-Lng-A-T | 233 | chr3:5532250-5532350 |
| chr3 | 5562050 | 5562150 | 1065-Lng-A-T | 56  | chr3:5562050-5562150 |
| chr3 | 5730450 | 5730550 | 1065-Lng-A-T | 489 | chr3:5730450-5730550 |
| chr3 | 5886950 | 5887050 | 901-Lng-A-T  | 92  | chr3:5886950-5887050 |
| chr3 | 5969050 | 5969150 | 901-Lng-A-T  | 110 | chr3:5969050-5969150 |
| chr3 | 6052750 | 6052850 | 1223-Lng-B-T | 50  | chr3:6052750-6052850 |
| chr3 | 6102250 | 6102350 | 1004-Lng-A-T | 287 | chr3:6102250-6102350 |
| chr3 | 6105450 | 6105550 | 901-Lng-C-T  | 59  | chr3:6105450-6105550 |
| chr3 | 6201150 | 6201250 | 901-Lng-A-T  | 108 | chr3:6201150-6201250 |
| chr3 | 6317950 | 6318050 | 1151-Lng-A-T | 76  | chr3:6317950-6318050 |
| chr3 | 6322450 | 6322550 | 1090-Lng-A-T | 215 | chr3:6322450-6322550 |
| chr3 | 6452450 | 6452550 | 1223-Lng-C-T | 45  | chr3:6452450-6452550 |
| chr3 | 6452850 | 6452950 | 846-Lng-A-T  | 89  | chr3:6452850-6452950 |
| chr3 | 6526950 | 6527050 | 901-Lng-A-T  | 70  | chr3:6526950-6527050 |
| chr3 | 6629750 | 6629850 | 1072-Lng-A-T | 198 | chr3:6629750-6629850 |
| chr3 | 6722050 | 6722150 | 1065-Lng-A-T | 103 | chr3:6722050-6722150 |
| chr3 | 6982650 | 6982750 | 1223-Lng-B-T | 38  | chr3:6982650-6982750 |
| chr3 | 6985550 | 6985650 | 1152-Lng-A-T | 39  | chr3:6985550-6985650 |
| chr3 | 7031550 | 7031650 | 1072-Lng-A-T | 57  | chr3:7031550-7031650 |
| chr3 | 7504950 | 7505050 | 901-Lng-C-T  | 48  | chr3:7504950-7505050 |
| chr3 | 7512250 | 7512350 | 1223-Lng-C-T | 174 | chr3:7512250-7512350 |
| chr3 | 7512250 | 7512350 | 901-Lng-D-T  | 316 | chr3:7512250-7512350 |
| chr3 | 7520450 | 7520550 | 1065-Lng-B-T | 64  | chr3:7520450-7520550 |
| chr3 | 7535850 | 7535950 | 1072-Lng-A-T | 57  | chr3:7535850-7535950 |
| chr3 | 7577750 | 7577850 | 1152-Lng-A-T | 100 | chr3:7577750-7577850 |
| chr3 | 7688050 | 7688150 | 901-Lng-A-T  | 59  | chr3:7688050-7688150 |
| chr3 | 7873850 | 7873950 | 1090-Lng-A-T | 75  | chr3:7873850-7873950 |
| chr3 | 7884250 | 7884350 | 901-Lng-A-T  | 71  | chr3:7884250-7884350 |
| chr3 | 7972350 | 7972450 | 901-Lng-C-T  | 37  | chr3:7972350-7972450 |
| chr3 | 7981350 | 7981450 | 1274-Lng-A-T | 65  | chr3:7981350-7981450 |
| chr3 | 7990350 | 7990450 | 1152-Lng-A-T | 123 | chr3:7990350-7990450 |
| chr3 | 8150650 | 8150750 | 1223-Lng-D-T | 43  | chr3:8150650-8150750 |
| chr3 | 8459450 | 8459550 | 1100-Lng-A-T | 93  | chr3:8459450-8459550 |
| chr3 | 8868550 | 8868650 | 1090-Lng-B-T | 566 | chr3:8868550-8868650 |
| chr3 | 8888850 | 8888950 | 1065-Lng-A-T | 56  | chr3:8888850-8888950 |
| chr3 | 8938750 | 8938850 | 901-Lng-A-T  | 194 | chr3:8938750-8938850 |
| chr3 | 8951550 | 8951650 | 901-Lng-A-T  | 67  | chr3:8951550-8951650 |
| chr3 | 8968350 | 8968450 | 1274-Lng-A-T | 239 | chr3:8968350-8968450 |
| chr3 | 8979550 | 8979650 | 1151-Lng-A-T | 79  | chr3:8979550-8979650 |
| chr3 | 9269250 | 9269350 | 901-Lng-C-T  | 54  | chr3:9269250-9269350 |
| chr3 | 9281650 | 9281750 | 1223-Lng-C-T | 87  | chr3:9281650-9281750 |
| chr3 | 9463250 | 9463350 | 1065-Lng-A-T | 45  | chr3:9463250-9463350 |
| chr3 | 9476850 | 9476950 | 1274-Lng-A-T | 85  | chr3:9476850-9476950 |
| chr3 | 9486250 | 9486350 | 901-Lng-C-T  | 87  | chr3:9486250-9486350 |
| chr3 | 9493350 | 9493450 | 1065-Lng-A-T | 83  | chr3:9493350-9493450 |
| chr3 | 9510650 | 9510750 | 901-Lng-B-T  | 70  | chr3:9510650-9510750 |



**Table S2: SB Insertion regions**

|      |          |          |              |     |                        |
|------|----------|----------|--------------|-----|------------------------|
| chr3 | 9552850  | 9552950  | 1223-Lng-B-T | 53  | chr3:9552850-9552950   |
| chr3 | 9553950  | 9554050  | 1152-Lng-A-T | 40  | chr3:9553950-9554050   |
| chr3 | 9557050  | 9557150  | 1100-Lng-A-T | 65  | chr3:9557050-9557150   |
| chr3 | 9607850  | 9607950  | 1167-Lng-A-T | 91  | chr3:9607850-9607950   |
| chr3 | 9610650  | 9610750  | 1223-Lng-C-T | 52  | chr3:9610650-9610750   |
| chr3 | 9783450  | 9783550  | 1090-Lng-A-T | 66  | chr3:9783450-9783550   |
| chr3 | 9856750  | 9856850  | 901-Lng-B-T  | 121 | chr3:9856750-9856850   |
| chr3 | 9919250  | 9919350  | 1065-Lng-A-T | 63  | chr3:9919250-9919350   |
| chr3 | 10009150 | 10009250 | 1065-Lng-B-T | 115 | chr3:10009150-10009250 |
| chr3 | 10033250 | 10033350 | 1223-Lng-D-T | 179 | chr3:10033250-10033350 |
| chr3 | 10159550 | 10159650 | 1151-Lng-A-T | 57  | chr3:10159550-10159650 |
| chr3 | 10269050 | 10269150 | 1100-Lng-B-T | 76  | chr3:10269050-10269150 |
| chr3 | 10297850 | 10297950 | 1151-Lng-A-T | 63  | chr3:10297850-10297950 |
| chr3 | 10423050 | 10423150 | 1072-Lng-A-T | 76  | chr3:10423050-10423150 |
| chr3 | 10477950 | 10478050 | 1188-Lng-A-T | 219 | chr3:10477950-10478050 |
| chr3 | 10587350 | 10587450 | 1223-Lng-B-T | 293 | chr3:10587350-10587450 |
| chr3 | 10656450 | 10656550 | 901-Lng-C-T  | 36  | chr3:10656450-10656550 |
| chr3 | 10664250 | 10664350 | 1065-Lng-A-T | 103 | chr3:10664250-10664350 |
| chr3 | 11119050 | 11119150 | 1065-Lng-A-T | 62  | chr3:11119050-11119150 |
| chr3 | 11138950 | 11139050 | 1223-Lng-A-T | 92  | chr3:11138950-11139050 |
| chr3 | 11259250 | 11259350 | 1167-Lng-A-T | 55  | chr3:11259250-11259350 |
| chr3 | 11497550 | 11497650 | 1004-Lng-A-T | 71  | chr3:11497550-11497650 |
| chr3 | 11500250 | 11500350 | 1152-Lng-A-T | 43  | chr3:11500250-11500350 |
| chr3 | 11610150 | 11610250 | 1004-Lng-A-T | 76  | chr3:11610150-11610250 |
| chr3 | 11670150 | 11670250 | 1090-Lng-B-T | 142 | chr3:11670150-11670250 |
| chr3 | 11812850 | 11812950 | 1090-Lng-A-T | 55  | chr3:11812850-11812950 |
| chr3 | 11847350 | 11847450 | 1004-Lng-A-T | 940 | chr3:11847350-11847450 |
| chr3 | 11897750 | 11897850 | 1223-Lng-B-T | 88  | chr3:11897750-11897850 |
| chr3 | 12017150 | 12017250 | 1100-Lng-A-T | 56  | chr3:12017150-12017250 |
| chr3 | 12078350 | 12078450 | 1223-Lng-C-T | 48  | chr3:12078350-12078450 |
| chr3 | 12315650 | 12315750 | 1167-Lng-A-T | 108 | chr3:12315650-12315750 |
| chr3 | 12566450 | 12566550 | 1065-Lng-B-T | 45  | chr3:12566450-12566550 |
| chr3 | 12630350 | 12630450 | 901-Lng-B-T  | 234 | chr3:12630350-12630450 |
| chr3 | 12780450 | 12780550 | 1065-Lng-B-T | 70  | chr3:12780450-12780550 |
| chr3 | 12896650 | 12896750 | 846-Lng-A-T  | 112 | chr3:12896650-12896750 |
| chr3 | 12917050 | 12917150 | 1274-Lng-A-T | 113 | chr3:12917050-12917150 |
| chr3 | 13185950 | 13186050 | 1152-Lng-A-T | 43  | chr3:13185950-13186050 |
| chr3 | 13400650 | 13400750 | 1223-Lng-B-T | 44  | chr3:13400650-13400750 |
| chr3 | 13420350 | 13420450 | 1065-Lng-C-T | 86  | chr3:13420350-13420450 |
| chr3 | 13532450 | 13532550 | 1151-Lng-A-T | 60  | chr3:13532450-13532550 |
| chr3 | 13579050 | 13579150 | 1065-Lng-B-T | 68  | chr3:13579050-13579150 |
| chr3 | 13770150 | 13770250 | 1072-Lng-A-T | 59  | chr3:13770150-13770250 |
| chr3 | 14074350 | 14074450 | 1065-Lng-B-T | 70  | chr3:14074350-14074450 |
| chr3 | 14310950 | 14311050 | 1065-Lng-C-T | 62  | chr3:14310950-14311050 |
| chr3 | 14572150 | 14572250 | 1072-Lng-A-T | 52  | chr3:14572150-14572250 |
| chr3 | 14756850 | 14756950 | 901-Lng-A-T  | 76  | chr3:14756850-14756950 |

**Table S2: SB Insertion regions**

|      |          |          |              |     |                        |
|------|----------|----------|--------------|-----|------------------------|
| chr3 | 14996750 | 14996850 | 1151-Lng-A-T | 85  | chr3:14996750-14996850 |
| chr3 | 15017050 | 15017150 | 1004-Lng-A-T | 79  | chr3:15017050-15017150 |
| chr3 | 15585750 | 15585850 | 1151-Lng-A-T | 91  | chr3:15585750-15585850 |
| chr3 | 15725150 | 15725250 | 1152-Lng-A-T | 36  | chr3:15725150-15725250 |
| chr3 | 16021450 | 16021550 | 1072-Lng-A-T | 71  | chr3:16021450-16021550 |
| chr3 | 16090450 | 16090550 | 1223-Lng-D-T | 40  | chr3:16090450-16090550 |
| chr3 | 16095950 | 16096050 | 1223-Lng-D-T | 47  | chr3:16095950-16096050 |
| chr3 | 16097350 | 16097450 | 1065-Lng-A-T | 59  | chr3:16097350-16097450 |
| chr3 | 16104850 | 16104950 | 1090-Lng-A-T | 93  | chr3:16104850-16104950 |
| chr3 | 16117550 | 16117650 | 1100-Lng-A-T | 100 | chr3:16117550-16117650 |
| chr3 | 16194250 | 16194350 | 1072-Lng-A-T | 67  | chr3:16194250-16194350 |
| chr3 | 16230150 | 16230250 | 901-Lng-C-T  | 48  | chr3:16230150-16230250 |
| chr3 | 16267050 | 16267150 | 1151-Lng-A-T | 541 | chr3:16267050-16267150 |
| chr3 | 16303950 | 16304050 | 1065-Lng-A-T | 44  | chr3:16303950-16304050 |
| chr3 | 16332350 | 16332450 | 1065-Lng-A-T | 82  | chr3:16332350-16332450 |
| chr3 | 16411050 | 16411150 | 1152-Lng-A-T | 172 | chr3:16411050-16411150 |
| chr3 | 16561350 | 16561450 | 901-Lng-B-T  | 37  | chr3:16561350-16561450 |
| chr3 | 16745850 | 16745950 | 1090-Lng-A-T | 81  | chr3:16745850-16745950 |
| chr3 | 16824650 | 16824750 | 1152-Lng-A-T | 45  | chr3:16824650-16824750 |
| chr3 | 16831250 | 16831350 | 901-Lng-D-T  | 358 | chr3:16831250-16831350 |
| chr3 | 16925750 | 16925850 | 1223-Lng-D-T | 41  | chr3:16925750-16925850 |
| chr3 | 16943150 | 16943250 | 901-Lng-C-T  | 31  | chr3:16943150-16943250 |
| chr3 | 16992450 | 16992550 | 901-Lng-C-T  | 47  | chr3:16992450-16992550 |
| chr3 | 17224950 | 17225050 | 1090-Lng-A-T | 80  | chr3:17224950-17225050 |
| chr3 | 17244950 | 17245050 | 1072-Lng-A-T | 193 | chr3:17244950-17245050 |
| chr3 | 17954150 | 17954250 | 1065-Lng-B-T | 48  | chr3:17954150-17954250 |
| chr3 | 18032650 | 18032750 | 1065-Lng-B-T | 60  | chr3:18032650-18032750 |
| chr3 | 18123650 | 18123750 | 901-Lng-A-T  | 62  | chr3:18123650-18123750 |
| chr3 | 18218850 | 18218950 | 1065-Lng-B-T | 60  | chr3:18218850-18218950 |
| chr3 | 18337550 | 18337650 | 1152-Lng-A-T | 77  | chr3:18337550-18337650 |
| chr3 | 18410650 | 18410750 | 1188-Lng-A-T | 36  | chr3:18410650-18410750 |
| chr3 | 18425450 | 18425550 | 901-Lng-C-T  | 36  | chr3:18425450-18425550 |
| chr3 | 18544050 | 18544150 | 901-Lng-C-T  | 52  | chr3:18544050-18544150 |
| chr3 | 18744150 | 18744250 | 1090-Lng-A-T | 64  | chr3:18744150-18744250 |
| chr3 | 19088950 | 19089050 | 901-Lng-B-T  | 243 | chr3:19088950-19089050 |
| chr3 | 19118850 | 19118950 | 1167-Lng-A-T | 48  | chr3:19118850-19118950 |
| chr3 | 19153850 | 19153950 | 1274-Lng-A-T | 77  | chr3:19153850-19153950 |
| chr3 | 19160050 | 19160150 | 1152-Lng-A-T | 50  | chr3:19160050-19160150 |
| chr3 | 19171450 | 19171550 | 1188-Lng-A-T | 36  | chr3:19171450-19171550 |
| chr3 | 19189450 | 19189550 | 1274-Lng-A-T | 66  | chr3:19189450-19189550 |
| chr3 | 19306950 | 19307050 | 1223-Lng-A-T | 95  | chr3:19306950-19307050 |
| chr3 | 19326550 | 19326650 | 1065-Lng-B-T | 67  | chr3:19326550-19326650 |
| chr3 | 19606050 | 19606150 | 1223-Lng-A-T | 57  | chr3:19606050-19606150 |
| chr3 | 19624650 | 19624750 | 1223-Lng-C-T | 43  | chr3:19624650-19624750 |
| chr3 | 19661850 | 19661950 | 1072-Lng-A-T | 56  | chr3:19661850-19661950 |
| chr3 | 19848350 | 19848450 | 1090-Lng-B-T | 372 | chr3:19848350-19848450 |

**Table S2: SB Insertion regions**

|      |          |          |              |      |                        |
|------|----------|----------|--------------|------|------------------------|
| chr3 | 19867650 | 19867750 | 846-Lng-A-T  | 66   | chr3:19867650-19867750 |
| chr3 | 19916450 | 19916550 | 1223-Lng-A-T | 237  | chr3:19916450-19916550 |
| chr3 | 19933650 | 19933750 | 1065-Lng-B-T | 271  | chr3:19933650-19933750 |
| chr3 | 20030450 | 20030550 | 1090-Lng-A-T | 85   | chr3:20030450-20030550 |
| chr3 | 20035250 | 20035350 | 1223-Lng-D-T | 87   | chr3:20035250-20035350 |
| chr3 | 20160050 | 20160150 | 1274-Lng-A-T | 173  | chr3:20160050-20160150 |
| chr3 | 20334250 | 20334350 | 1223-Lng-B-T | 271  | chr3:20334250-20334350 |
| chr3 | 20358650 | 20358750 | 1223-Lng-A-T | 90   | chr3:20358650-20358750 |
| chr3 | 20977850 | 20977950 | 1223-Lng-B-T | 429  | chr3:20977850-20977950 |
| chr3 | 21020750 | 21020850 | 1065-Lng-A-T | 74   | chr3:21020750-21020850 |
| chr3 | 21060150 | 21060250 | 1004-Lng-A-T | 66   | chr3:21060150-21060250 |
| chr3 | 21164850 | 21164950 | 1223-Lng-B-T | 231  | chr3:21164850-21164950 |
| chr3 | 21470350 | 21470450 | 901-Lng-C-T  | 108  | chr3:21470350-21470450 |
| chr3 | 21487450 | 21487550 | 1274-Lng-A-T | 65   | chr3:21487450-21487550 |
| chr3 | 21972850 | 21972950 | 901-Lng-A-T  | 72   | chr3:21972850-21972950 |
| chr3 | 21984550 | 21984650 | 1274-Lng-A-T | 86   | chr3:21984550-21984650 |
| chr3 | 22012350 | 22012450 | 1223-Lng-B-T | 40   | chr3:22012350-22012450 |
| chr3 | 22022250 | 22022350 | 1065-Lng-B-T | 93   | chr3:22022250-22022350 |
| chr3 | 22080450 | 22080550 | 1072-Lng-A-T | 205  | chr3:22080450-22080550 |
| chr3 | 22099050 | 22099150 | 901-Lng-B-T  | 228  | chr3:22099050-22099150 |
| chr3 | 22103350 | 22103450 | 1152-Lng-A-T | 33   | chr3:22103350-22103450 |
| chr3 | 22773050 | 22773150 | 901-Lng-A-T  | 92   | chr3:22773050-22773150 |
| chr3 | 23070950 | 23071050 | 1065-Lng-A-T | 51   | chr3:23070950-23071050 |
| chr3 | 23095950 | 23096050 | 1223-Lng-D-T | 44   | chr3:23095950-23096050 |
| chr3 | 23114850 | 23114950 | 1152-Lng-A-T | 70   | chr3:23114850-23114950 |
| chr3 | 23330250 | 23330350 | 1065-Lng-A-T | 66   | chr3:23330250-23330350 |
| chr3 | 23331550 | 23331650 | 1167-Lng-A-T | 128  | chr3:23331550-23331650 |
| chr3 | 23676150 | 23676250 | 1090-Lng-B-T | 823  | chr3:23676150-23676250 |
| chr3 | 23772350 | 23772450 | 901-Lng-B-T  | 143  | chr3:23772350-23772450 |
| chr3 | 23906050 | 23906150 | 1065-Lng-C-T | 127  | chr3:23906050-23906150 |
| chr3 | 24036150 | 24036250 | 1167-Lng-A-T | 57   | chr3:24036150-24036250 |
| chr3 | 24154050 | 24154150 | 1072-Lng-A-T | 160  | chr3:24154050-24154150 |
| chr3 | 24231850 | 24231950 | 901-Lng-A-T  | 95   | chr3:24231850-24231950 |
| chr3 | 24358550 | 24358650 | 1065-Lng-B-T | 43   | chr3:24358550-24358650 |
| chr3 | 24413450 | 24413550 | 1223-Lng-B-T | 53   | chr3:24413450-24413550 |
| chr3 | 24447150 | 24447250 | 1090-Lng-B-T | 723  | chr3:24447150-24447250 |
| chr3 | 24567750 | 24567850 | 1100-Lng-A-T | 83   | chr3:24567750-24567850 |
| chr3 | 24678950 | 24679050 | 1223-Lng-C-T | 53   | chr3:24678950-24679050 |
| chr3 | 24742250 | 24742350 | 1072-Lng-A-T | 224  | chr3:24742250-24742350 |
| chr3 | 24871050 | 24871150 | 1223-Lng-B-T | 48   | chr3:24871050-24871150 |
| chr3 | 25107750 | 25107850 | 846-Lng-A-T  | 2210 | chr3:25107750-25107850 |
| chr3 | 25303050 | 25303150 | 1151-Lng-A-T | 215  | chr3:25303050-25303150 |
| chr3 | 25423950 | 25424050 | 1090-Lng-B-T | 293  | chr3:25423950-25424050 |
| chr3 | 25430650 | 25430750 | 1004-Lng-A-T | 90   | chr3:25430650-25430750 |
| chr3 | 25439350 | 25439450 | 1152-Lng-A-T | 198  | chr3:25439350-25439450 |
| chr3 | 25511350 | 25511450 | 1065-Lng-B-T | 59   | chr3:25511350-25511450 |

**Table S2: SB Insertion regions**

|      |          |          |              |      |                        |
|------|----------|----------|--------------|------|------------------------|
| chr3 | 25772150 | 25772250 | 1065-Lng-C-T | 80   | chr3:25772150-25772250 |
| chr3 | 26143850 | 26143950 | 1223-Lng-A-T | 236  | chr3:26143850-26143950 |
| chr3 | 26218650 | 26218750 | 1223-Lng-A-T | 75   | chr3:26218650-26218750 |
| chr3 | 26239050 | 26239150 | 901-Lng-D-T  | 168  | chr3:26239050-26239150 |
| chr3 | 27114650 | 27114750 | 901-Lng-A-T  | 187  | chr3:27114650-27114750 |
| chr3 | 27119850 | 27119950 | 1167-Lng-A-T | 69   | chr3:27119850-27119950 |
| chr3 | 27121450 | 27121550 | 1100-Lng-A-T | 64   | chr3:27121450-27121550 |
| chr3 | 27122350 | 27122450 | 1100-Lng-A-T | 92   | chr3:27122350-27122450 |
| chr3 | 27164450 | 27164550 | 846-Lng-A-T  | 211  | chr3:27164450-27164550 |
| chr3 | 27378650 | 27378750 | 1152-Lng-A-T | 33   | chr3:27378650-27378750 |
| chr3 | 27440750 | 27440850 | 901-Lng-B-T  | 78   | chr3:27440750-27440850 |
| chr3 | 27468050 | 27468150 | 901-Lng-D-T  | 98   | chr3:27468050-27468150 |
| chr3 | 27503550 | 27503650 | 1167-Lng-A-T | 81   | chr3:27503550-27503650 |
| chr3 | 27553550 | 27553650 | 1100-Lng-A-T | 120  | chr3:27553550-27553650 |
| chr3 | 27606750 | 27606850 | 1223-Lng-B-T | 53   | chr3:27606750-27606850 |
| chr3 | 27633750 | 27633850 | 1065-Lng-C-T | 72   | chr3:27633750-27633850 |
| chr3 | 27635150 | 27635250 | 901-Lng-B-T  | 194  | chr3:27635150-27635250 |
| chr3 | 27918150 | 27918250 | 1152-Lng-A-T | 128  | chr3:27918150-27918250 |
| chr3 | 27981050 | 27981150 | 1065-Lng-A-T | 44   | chr3:27981050-27981150 |
| chr3 | 28074350 | 28074450 | 901-Lng-A-T  | 80   | chr3:28074350-28074450 |
| chr3 | 28208550 | 28208650 | 1090-Lng-B-T | 68   | chr3:28208550-28208650 |
| chr3 | 28366950 | 28367050 | 846-Lng-A-T  | 1596 | chr3:28366950-28367050 |
| chr3 | 28375350 | 28375450 | 1223-Lng-D-T | 41   | chr3:28375350-28375450 |
| chr3 | 28578150 | 28578250 | 1188-Lng-A-T | 35   | chr3:28578150-28578250 |
| chr3 | 29027150 | 29027250 | 1223-Lng-B-T | 41   | chr3:29027150-29027250 |
| chr3 | 29246350 | 29246450 | 1167-Lng-A-T | 122  | chr3:29246350-29246450 |
| chr3 | 29342350 | 29342450 | 901-Lng-C-T  | 46   | chr3:29342350-29342450 |
| chr3 | 29434650 | 29434750 | 1151-Lng-A-T | 146  | chr3:29434650-29434750 |
| chr3 | 29463150 | 29463250 | 846-Lng-A-T  | 94   | chr3:29463150-29463250 |
| chr3 | 29527450 | 29527550 | 1223-Lng-C-T | 47   | chr3:29527450-29527550 |
| chr3 | 29586550 | 29586650 | 1274-Lng-A-T | 168  | chr3:29586550-29586650 |
| chr3 | 29598150 | 29598250 | 901-Lng-A-T  | 81   | chr3:29598150-29598250 |
| chr3 | 29718650 | 29718750 | 901-Lng-B-T  | 124  | chr3:29718650-29718750 |
| chr3 | 29775550 | 29775650 | 1100-Lng-A-T | 138  | chr3:29775550-29775650 |
| chr3 | 29844250 | 29844350 | 1100-Lng-A-T | 97   | chr3:29844250-29844350 |
| chr3 | 29857350 | 29857450 | 1167-Lng-A-T | 64   | chr3:29857350-29857450 |
| chr3 | 29869950 | 29870050 | 1100-Lng-A-T | 57   | chr3:29869950-29870050 |
| chr3 | 29886750 | 29886850 | 1090-Lng-A-T | 67   | chr3:29886750-29886850 |
| chr3 | 29940550 | 29940650 | 1004-Lng-A-T | 66   | chr3:29940550-29940650 |
| chr3 | 29941250 | 29941350 | 901-Lng-C-T  | 132  | chr3:29941250-29941350 |
| chr3 | 29987950 | 29988050 | 1065-Lng-A-T | 36   | chr3:29987950-29988050 |
| chr3 | 30084850 | 30084950 | 1223-Lng-A-T | 168  | chr3:30084850-30084950 |
| chr3 | 30085350 | 30085450 | 1223-Lng-C-T | 55   | chr3:30085350-30085450 |
| chr3 | 30095850 | 30095950 | 1223-Lng-A-T | 178  | chr3:30095850-30095950 |
| chr3 | 30103750 | 30103850 | 1274-Lng-A-T | 3240 | chr3:30103750-30103850 |
| chr3 | 30158450 | 30158550 | 1223-Lng-C-T | 44   | chr3:30158450-30158550 |

**Table S2: SB Insertion regions**

|      |          |          |              |     |                        |
|------|----------|----------|--------------|-----|------------------------|
| chr3 | 30186950 | 30187050 | 1065-Lng-A-T | 60  | chr3:30186950-30187050 |
| chr3 | 30211350 | 30211450 | 901-Lng-A-T  | 55  | chr3:30211350-30211450 |
| chr3 | 30212850 | 30212950 | 1065-Lng-B-T | 55  | chr3:30212850-30212950 |
| chr3 | 30247650 | 30247750 | 1090-Lng-A-T | 154 | chr3:30247650-30247750 |
| chr3 | 30253650 | 30253750 | 901-Lng-A-T  | 74  | chr3:30253650-30253750 |
| chr3 | 30277750 | 30277850 | 901-Lng-A-T  | 166 | chr3:30277750-30277850 |
| chr3 | 30289750 | 30289850 | 1223-Lng-B-T | 112 | chr3:30289750-30289850 |
| chr3 | 30354150 | 30354250 | 1065-Lng-C-T | 63  | chr3:30354150-30354250 |
| chr3 | 30510250 | 30510350 | 1152-Lng-A-T | 266 | chr3:30510250-30510350 |
| chr3 | 30703750 | 30703850 | 1090-Lng-A-T | 111 | chr3:30703750-30703850 |
| chr3 | 30708050 | 30708150 | 1090-Lng-A-T | 62  | chr3:30708050-30708150 |
| chr3 | 30716450 | 30716550 | 901-Lng-D-T  | 387 | chr3:30716450-30716550 |
| chr3 | 30769450 | 30769550 | 1065-Lng-A-T | 65  | chr3:30769450-30769550 |
| chr3 | 30803150 | 30803250 | 1223-Lng-B-T | 40  | chr3:30803150-30803250 |
| chr3 | 30857250 | 30857350 | 1004-Lng-A-T | 127 | chr3:30857250-30857350 |
| chr3 | 30922050 | 30922150 | 1167-Lng-A-T | 69  | chr3:30922050-30922150 |
| chr3 | 30980750 | 30980850 | 1167-Lng-A-T | 45  | chr3:30980750-30980850 |
| chr3 | 31000850 | 31000950 | 1152-Lng-A-T | 62  | chr3:31000850-31000950 |
| chr3 | 31010550 | 31010650 | 1065-Lng-C-T | 68  | chr3:31010550-31010650 |
| chr3 | 31143850 | 31143950 | 1223-Lng-B-T | 66  | chr3:31143850-31143950 |
| chr3 | 31156950 | 31157050 | 1065-Lng-A-T | 143 | chr3:31156950-31157050 |
| chr3 | 31183150 | 31183250 | 1188-Lng-A-T | 89  | chr3:31183150-31183250 |
| chr3 | 31224950 | 31225050 | 1065-Lng-A-T | 61  | chr3:31224950-31225050 |
| chr3 | 31360650 | 31360750 | 846-Lng-A-T  | 174 | chr3:31360650-31360750 |
| chr3 | 31382650 | 31382750 | 1152-Lng-A-T | 50  | chr3:31382650-31382750 |
| chr3 | 31667650 | 31667750 | 1065-Lng-B-T | 74  | chr3:31667650-31667750 |
| chr3 | 31751250 | 31751350 | 1152-Lng-A-T | 112 | chr3:31751250-31751350 |
| chr3 | 31863350 | 31863450 | 1072-Lng-A-T | 72  | chr3:31863350-31863450 |
| chr3 | 32098250 | 32098350 | 1188-Lng-A-T | 36  | chr3:32098250-32098350 |
| chr3 | 32148950 | 32149050 | 1152-Lng-A-T | 64  | chr3:32148950-32149050 |
| chr3 | 32187950 | 32188050 | 1223-Lng-B-T | 66  | chr3:32187950-32188050 |
| chr3 | 32246550 | 32246650 | 901-Lng-B-T  | 97  | chr3:32246550-32246650 |
| chr3 | 32325950 | 32326050 | 901-Lng-D-T  | 385 | chr3:32325950-32326050 |
| chr3 | 32329650 | 32329750 | 1274-Lng-A-T | 97  | chr3:32329650-32329750 |
| chr3 | 32345550 | 32345650 | 1090-Lng-A-T | 83  | chr3:32345550-32345650 |
| chr3 | 32367750 | 32367850 | 901-Lng-A-T  | 120 | chr3:32367750-32367850 |
| chr3 | 32529950 | 32530050 | 1100-Lng-A-T | 84  | chr3:32529950-32530050 |
| chr3 | 32594050 | 32594150 | 1072-Lng-A-T | 99  | chr3:32594050-32594150 |
| chr3 | 32751250 | 32751350 | 846-Lng-A-T  | 104 | chr3:32751250-32751350 |
| chr3 | 32762950 | 32763050 | 1065-Lng-C-T | 61  | chr3:32762950-32763050 |
| chr3 | 32784150 | 32784250 | 1072-Lng-A-T | 49  | chr3:32784150-32784250 |
| chr3 | 33010950 | 33011050 | 1072-Lng-A-T | 52  | chr3:33010950-33011050 |
| chr3 | 33334350 | 33334450 | 1223-Lng-B-T | 48  | chr3:33334350-33334450 |
| chr3 | 33744950 | 33745050 | 1065-Lng-B-T | 61  | chr3:33744950-33745050 |
| chr3 | 33835850 | 33835950 | 1152-Lng-A-T | 55  | chr3:33835850-33835950 |
| chr3 | 33898450 | 33898550 | 1072-Lng-A-T | 55  | chr3:33898450-33898550 |

**Table S2: SB Insertion regions**

|      |          |          |              |     |                        |
|------|----------|----------|--------------|-----|------------------------|
| chr3 | 33925550 | 33925650 | 901-Lng-C-T  | 67  | chr3:33925550-33925650 |
| chr3 | 33940650 | 33940750 | 846-Lng-A-T  | 145 | chr3:33940650-33940750 |
| chr3 | 33962050 | 33962150 | 901-Lng-A-T  | 81  | chr3:33962050-33962150 |
| chr3 | 33970650 | 33970750 | 1004-Lng-A-T | 55  | chr3:33970650-33970750 |
| chr3 | 33978750 | 33978850 | 1151-Lng-A-T | 57  | chr3:33978750-33978850 |
| chr3 | 34012550 | 34012650 | 1152-Lng-A-T | 31  | chr3:34012550-34012650 |
| chr3 | 34567750 | 34567850 | 1223-Lng-A-T | 207 | chr3:34567750-34567850 |
| chr3 | 34653750 | 34653850 | 846-Lng-A-T  | 117 | chr3:34653750-34653850 |
| chr3 | 34814750 | 34814850 | 1223-Lng-A-T | 111 | chr3:34814750-34814850 |
| chr3 | 34851150 | 34851250 | 1004-Lng-A-T | 65  | chr3:34851150-34851250 |
| chr3 | 35524950 | 35525050 | 1065-Lng-A-T | 582 | chr3:35524950-35525050 |
| chr3 | 35560750 | 35560850 | 901-Lng-A-T  | 97  | chr3:35560750-35560850 |
| chr3 | 35598950 | 35599050 | 1151-Lng-A-T | 129 | chr3:35598950-35599050 |
| chr3 | 35657850 | 35657950 | 1090-Lng-A-T | 74  | chr3:35657850-35657950 |
| chr3 | 35662450 | 35662550 | 1065-Lng-A-T | 100 | chr3:35662450-35662550 |
| chr3 | 35663550 | 35663650 | 1100-Lng-A-T | 99  | chr3:35663550-35663650 |
| chr3 | 35673050 | 35673150 | 901-Lng-C-T  | 46  | chr3:35673050-35673150 |
| chr3 | 35677150 | 35677250 | 1223-Lng-A-T | 285 | chr3:35677150-35677250 |
| chr3 | 35695550 | 35695650 | 846-Lng-A-T  | 138 | chr3:35695550-35695650 |
| chr3 | 35754150 | 35754250 | 1152-Lng-A-T | 87  | chr3:35754150-35754250 |
| chr3 | 35761550 | 35761650 | 1223-Lng-C-T | 48  | chr3:35761550-35761650 |
| chr3 | 35870750 | 35870850 | 1090-Lng-B-T | 100 | chr3:35870750-35870850 |
| chr3 | 35871950 | 35872050 | 1004-Lng-A-T | 73  | chr3:35871950-35872050 |
| chr3 | 35973450 | 35973550 | 846-Lng-A-T  | 118 | chr3:35973450-35973550 |
| chr3 | 36259850 | 36259950 | 901-Lng-B-T  | 117 | chr3:36259850-36259950 |
| chr3 | 36363150 | 36363250 | 1167-Lng-A-T | 54  | chr3:36363150-36363250 |
| chr3 | 36454050 | 36454150 | 1151-Lng-A-T | 310 | chr3:36454050-36454150 |
| chr3 | 36826650 | 36826750 | 1072-Lng-A-T | 126 | chr3:36826650-36826750 |
| chr3 | 36869850 | 36869950 | 901-Lng-C-T  | 34  | chr3:36869850-36869950 |
| chr3 | 36887450 | 36887550 | 1223-Lng-B-T | 131 | chr3:36887450-36887550 |
| chr3 | 36889450 | 36889550 | 1223-Lng-B-T | 53  | chr3:36889450-36889550 |
| chr3 | 36952250 | 36952350 | 901-Lng-A-T  | 133 | chr3:36952250-36952350 |
| chr3 | 37020550 | 37020650 | 1152-Lng-A-T | 142 | chr3:37020550-37020650 |
| chr3 | 37043550 | 37043650 | 901-Lng-D-T  | 70  | chr3:37043550-37043650 |
| chr3 | 37207350 | 37207450 | 1223-Lng-D-T | 48  | chr3:37207350-37207450 |
| chr3 | 37243850 | 37243950 | 901-Lng-A-T  | 93  | chr3:37243850-37243950 |
| chr3 | 37338250 | 37338350 | 1065-Lng-A-T | 360 | chr3:37338250-37338350 |
| chr3 | 37370250 | 37370350 | 1004-Lng-A-T | 120 | chr3:37370250-37370350 |
| chr3 | 37395650 | 37395750 | 1188-Lng-A-T | 372 | chr3:37395650-37395750 |
| chr3 | 37416450 | 37416550 | 1223-Lng-D-T | 45  | chr3:37416450-37416550 |
| chr3 | 37474050 | 37474150 | 1151-Lng-A-T | 367 | chr3:37474050-37474150 |
| chr3 | 37549150 | 37549250 | 901-Lng-A-T  | 231 | chr3:37549150-37549250 |
| chr3 | 37614550 | 37614650 | 1274-Lng-A-T | 65  | chr3:37614550-37614650 |
| chr3 | 37635050 | 37635150 | 901-Lng-A-T  | 112 | chr3:37635050-37635150 |
| chr3 | 37667450 | 37667550 | 1223-Lng-B-T | 37  | chr3:37667450-37667550 |
| chr3 | 37734650 | 37734750 | 1072-Lng-A-T | 67  | chr3:37734650-37734750 |

**Table S2: SB Insertion regions**

|      |          |          |              |      |                        |
|------|----------|----------|--------------|------|------------------------|
| chr3 | 37961650 | 37961750 | 901-Lng-A-T  | 66   | chr3:37961650-37961750 |
| chr3 | 37993050 | 37993150 | 1090-Lng-A-T | 67   | chr3:37993050-37993150 |
| chr3 | 38300850 | 38300950 | 901-Lng-A-T  | 68   | chr3:38300850-38300950 |
| chr3 | 38303950 | 38304050 | 1223-Lng-B-T | 235  | chr3:38303950-38304050 |
| chr3 | 38375750 | 38375850 | 1152-Lng-A-T | 140  | chr3:38375750-38375850 |
| chr3 | 38393150 | 38393250 | 901-Lng-B-T  | 107  | chr3:38393150-38393250 |
| chr3 | 38567050 | 38567150 | 1223-Lng-A-T | 379  | chr3:38567050-38567150 |
| chr3 | 38610750 | 38610850 | 1223-Lng-A-T | 215  | chr3:38610750-38610850 |
| chr3 | 38718850 | 38718950 | 1065-Lng-B-T | 41   | chr3:38718850-38718950 |
| chr3 | 38916650 | 38916750 | 901-Lng-C-T  | 115  | chr3:38916650-38916750 |
| chr3 | 38972150 | 38972250 | 901-Lng-C-T  | 46   | chr3:38972150-38972250 |
| chr3 | 39126350 | 39126450 | 1223-Lng-D-T | 53   | chr3:39126350-39126450 |
| chr3 | 39397550 | 39397650 | 1090-Lng-A-T | 110  | chr3:39397550-39397650 |
| chr3 | 39737650 | 39737750 | 846-Lng-A-T  | 123  | chr3:39737650-39737750 |
| chr3 | 39748350 | 39748450 | 1065-Lng-B-T | 54   | chr3:39748350-39748450 |
| chr3 | 39748650 | 39748750 | 901-Lng-D-T  | 496  | chr3:39748650-39748750 |
| chr3 | 39808450 | 39808550 | 1152-Lng-A-T | 88   | chr3:39808450-39808550 |
| chr3 | 39994650 | 39994750 | 1065-Lng-A-T | 160  | chr3:39994650-39994750 |
| chr3 | 40094150 | 40094250 | 901-Lng-B-T  | 183  | chr3:40094150-40094250 |
| chr3 | 40220650 | 40220750 | 1072-Lng-A-T | 74   | chr3:40220650-40220750 |
| chr3 | 40608150 | 40608250 | 901-Lng-B-T  | 116  | chr3:40608150-40608250 |
| chr3 | 40737450 | 40737550 | 901-Lng-A-T  | 447  | chr3:40737450-40737550 |
| chr3 | 40795350 | 40795450 | 1223-Lng-D-T | 88   | chr3:40795350-40795450 |
| chr3 | 40878150 | 40878250 | 846-Lng-A-T  | 192  | chr3:40878150-40878250 |
| chr3 | 41161650 | 41161750 | 1274-Lng-A-T | 62   | chr3:41161650-41161750 |
| chr3 | 41387350 | 41387450 | 1100-Lng-A-T | 67   | chr3:41387350-41387450 |
| chr3 | 41389450 | 41389550 | 1004-Lng-A-T | 69   | chr3:41389450-41389550 |
| chr3 | 41409450 | 41409550 | 1223-Lng-D-T | 57   | chr3:41409450-41409550 |
| chr3 | 41447250 | 41447350 | 901-Lng-B-T  | 241  | chr3:41447250-41447350 |
| chr3 | 41532650 | 41532750 | 901-Lng-B-T  | 104  | chr3:41532650-41532750 |
| chr3 | 41558050 | 41558150 | 1065-Lng-C-T | 3014 | chr3:41558050-41558150 |
| chr3 | 41714850 | 41714950 | 1152-Lng-A-T | 31   | chr3:41714850-41714950 |
| chr3 | 42176650 | 42176750 | 1188-Lng-A-T | 37   | chr3:42176650-42176750 |
| chr3 | 42594250 | 42594350 | 1223-Lng-D-T | 54   | chr3:42594250-42594350 |
| chr3 | 42676850 | 42676950 | 1065-Lng-B-T | 51   | chr3:42676850-42676950 |
| chr3 | 42734350 | 42734450 | 1274-Lng-A-T | 49   | chr3:42734350-42734450 |
| chr3 | 42923150 | 42923250 | 1065-Lng-A-T | 95   | chr3:42923150-42923250 |
| chr3 | 42942050 | 42942150 | 901-Lng-B-T  | 155  | chr3:42942050-42942150 |
| chr3 | 43286450 | 43286550 | 1090-Lng-A-T | 69   | chr3:43286450-43286550 |
| chr3 | 43303650 | 43303750 | 1152-Lng-A-T | 107  | chr3:43303650-43303750 |
| chr3 | 43334950 | 43335050 | 1223-Lng-B-T | 141  | chr3:43334950-43335050 |
| chr3 | 43357250 | 43357350 | 901-Lng-C-T  | 107  | chr3:43357250-43357350 |
| chr3 | 43513750 | 43513850 | 1072-Lng-A-T | 59   | chr3:43513750-43513850 |
| chr3 | 43566850 | 43566950 | 901-Lng-B-T  | 181  | chr3:43566850-43566950 |
| chr3 | 43579150 | 43579250 | 1223-Lng-A-T | 87   | chr3:43579150-43579250 |
| chr3 | 43921750 | 43921850 | 1151-Lng-A-T | 146  | chr3:43921750-43921850 |

**Table S2: SB Insertion regions**

|      |          |          |              |      |                        |
|------|----------|----------|--------------|------|------------------------|
| chr3 | 44031550 | 44031650 | 1223-Lng-B-T | 36   | chr3:44031550-44031650 |
| chr3 | 44038350 | 44038450 | 1065-Lng-B-T | 68   | chr3:44038350-44038450 |
| chr3 | 44179150 | 44179250 | 1100-Lng-A-T | 70   | chr3:44179150-44179250 |
| chr3 | 44228050 | 44228150 | 1152-Lng-A-T | 60   | chr3:44228050-44228150 |
| chr3 | 44320150 | 44320250 | 846-Lng-A-T  | 129  | chr3:44320150-44320250 |
| chr3 | 44619950 | 44620050 | 1223-Lng-D-T | 42   | chr3:44619950-44620050 |
| chr3 | 44639350 | 44639450 | 1065-Lng-B-T | 80   | chr3:44639350-44639450 |
| chr3 | 45045250 | 45045350 | 1065-Lng-B-T | 83   | chr3:45045250-45045350 |
| chr3 | 45105450 | 45105550 | 1065-Lng-A-T | 67   | chr3:45105450-45105550 |
| chr3 | 45120650 | 45120750 | 1223-Lng-A-T | 1498 | chr3:45120650-45120750 |
| chr3 | 45164050 | 45164150 | 901-Lng-C-T  | 69   | chr3:45164050-45164150 |
| chr3 | 45428550 | 45428650 | 1065-Lng-B-T | 40   | chr3:45428550-45428650 |
| chr3 | 45453150 | 45453250 | 901-Lng-B-T  | 150  | chr3:45453150-45453250 |
| chr3 | 45814450 | 45814550 | 1100-Lng-A-T | 98   | chr3:45814450-45814550 |
| chr3 | 45913650 | 45913750 | 1223-Lng-B-T | 38   | chr3:45913650-45913750 |
| chr3 | 45977650 | 45977750 | 1100-Lng-A-T | 52   | chr3:45977650-45977750 |
| chr3 | 46060450 | 46060550 | 1274-Lng-A-T | 88   | chr3:46060450-46060550 |
| chr3 | 46173150 | 46173250 | 901-Lng-A-T  | 129  | chr3:46173150-46173250 |
| chr3 | 46179050 | 46179150 | 1223-Lng-B-T | 52   | chr3:46179050-46179150 |
| chr3 | 46426650 | 46426750 | 1223-Lng-B-T | 189  | chr3:46426650-46426750 |
| chr3 | 46426750 | 46426850 | 1274-Lng-A-T | 57   | chr3:46426750-46426850 |
| chr3 | 47052650 | 47052750 | 1090-Lng-B-T | 204  | chr3:47052650-47052750 |
| chr3 | 47144250 | 47144350 | 1152-Lng-A-T | 118  | chr3:47144250-47144350 |
| chr3 | 47183450 | 47183550 | 901-Lng-C-T  | 191  | chr3:47183450-47183550 |
| chr3 | 47320850 | 47320950 | 1004-Lng-A-T | 53   | chr3:47320850-47320950 |
| chr3 | 47341750 | 47341850 | 1188-Lng-A-T | 44   | chr3:47341750-47341850 |
| chr3 | 47493450 | 47493550 | 1072-Lng-A-T | 51   | chr3:47493450-47493550 |
| chr3 | 47564750 | 47564850 | 901-Lng-D-T  | 122  | chr3:47564750-47564850 |
| chr3 | 47584550 | 47584650 | 1274-Lng-A-T | 69   | chr3:47584550-47584650 |
| chr3 | 47634650 | 47634750 | 1223-Lng-D-T | 40   | chr3:47634650-47634750 |
| chr3 | 48198050 | 48198150 | 1100-Lng-A-T | 80   | chr3:48198050-48198150 |
| chr3 | 48408150 | 48408250 | 1152-Lng-A-T | 79   | chr3:48408150-48408250 |
| chr3 | 48490050 | 48490150 | 901-Lng-A-T  | 153  | chr3:48490050-48490150 |
| chr3 | 48818850 | 48818950 | 1090-Lng-A-T | 44   | chr3:48818850-48818950 |
| chr3 | 49000650 | 49000750 | 1065-Lng-C-T | 75   | chr3:49000650-49000750 |
| chr3 | 49162550 | 49162650 | 1065-Lng-A-T | 37   | chr3:49162550-49162650 |
| chr3 | 49177850 | 49177950 | 1274-Lng-A-T | 54   | chr3:49177850-49177950 |
| chr3 | 49222350 | 49222450 | 1223-Lng-A-T | 96   | chr3:49222350-49222450 |
| chr3 | 49545550 | 49545650 | 901-Lng-C-T  | 43   | chr3:49545550-49545650 |
| chr3 | 49641750 | 49641850 | 1151-Lng-A-T | 68   | chr3:49641750-49641850 |
| chr3 | 49658550 | 49658650 | 846-Lng-A-T  | 145  | chr3:49658550-49658650 |
| chr3 | 49816650 | 49816750 | 901-Lng-B-T  | 84   | chr3:49816650-49816750 |
| chr3 | 49838450 | 49838550 | 1072-Lng-A-T | 58   | chr3:49838450-49838550 |
| chr3 | 50075550 | 50075650 | 901-Lng-C-T  | 220  | chr3:50075550-50075650 |
| chr3 | 50124650 | 50124750 | 1065-Lng-B-T | 72   | chr3:50124650-50124750 |
| chr3 | 50218750 | 50218850 | 1151-Lng-A-T | 110  | chr3:50218750-50218850 |



**Table S2: SB Insertion regions**

|      |          |          |              |     |                        |
|------|----------|----------|--------------|-----|------------------------|
| chr3 | 50225650 | 50225750 | 1004-Lng-A-T | 60  | chr3:50225650-50225750 |
| chr3 | 50451550 | 50451650 | 1065-Lng-C-T | 78  | chr3:50451550-50451650 |
| chr3 | 50650350 | 50650450 | 1100-Lng-A-T | 54  | chr3:50650350-50650450 |
| chr3 | 50899450 | 50899550 | 901-Lng-B-T  | 76  | chr3:50899450-50899550 |
| chr3 | 50974150 | 50974250 | 1090-Lng-A-T | 139 | chr3:50974150-50974250 |
| chr3 | 51112950 | 51113050 | 1167-Lng-A-T | 144 | chr3:51112950-51113050 |
| chr3 | 51134250 | 51134350 | 1223-Lng-A-T | 94  | chr3:51134250-51134350 |
| chr3 | 51141250 | 51141350 | 1065-Lng-A-T | 40  | chr3:51141250-51141350 |
| chr3 | 51177650 | 51177750 | 1065-Lng-C-T | 69  | chr3:51177650-51177750 |
| chr3 | 51225350 | 51225450 | 901-Lng-B-T  | 101 | chr3:51225350-51225450 |
| chr3 | 51266150 | 51266250 | 1151-Lng-A-T | 281 | chr3:51266150-51266250 |
| chr3 | 51292550 | 51292650 | 1152-Lng-A-T | 67  | chr3:51292550-51292650 |
| chr3 | 51292850 | 51292950 | 1090-Lng-A-T | 581 | chr3:51292850-51292950 |
| chr3 | 51521750 | 51521850 | 1188-Lng-A-T | 45  | chr3:51521750-51521850 |
| chr3 | 51614450 | 51614550 | 1065-Lng-B-T | 41  | chr3:51614450-51614550 |
| chr3 | 51620650 | 51620750 | 901-Lng-C-T  | 57  | chr3:51620650-51620750 |
| chr3 | 51647950 | 51648050 | 1188-Lng-A-T | 41  | chr3:51647950-51648050 |
| chr3 | 51678450 | 51678550 | 1274-Lng-A-T | 84  | chr3:51678450-51678550 |
| chr3 | 51741850 | 51741950 | 1004-Lng-A-T | 113 | chr3:51741850-51741950 |
| chr3 | 51774950 | 51775050 | 1167-Lng-A-T | 230 | chr3:51774950-51775050 |
| chr3 | 51858650 | 51858750 | 1223-Lng-B-T | 253 | chr3:51858650-51858750 |
| chr3 | 52070450 | 52070550 | 1274-Lng-A-T | 147 | chr3:52070450-52070550 |
| chr3 | 52087550 | 52087650 | 1167-Lng-A-T | 51  | chr3:52087550-52087650 |
| chr3 | 52103250 | 52103350 | 1167-Lng-A-T | 208 | chr3:52103250-52103350 |
| chr3 | 52608650 | 52608750 | 1274-Lng-A-T | 166 | chr3:52608650-52608750 |
| chr3 | 52656950 | 52657050 | 1004-Lng-A-T | 91  | chr3:52656950-52657050 |
| chr3 | 52784550 | 52784650 | 1065-Lng-B-T | 50  | chr3:52784550-52784650 |
| chr3 | 52852450 | 52852550 | 1004-Lng-A-T | 58  | chr3:52852450-52852550 |
| chr3 | 53056650 | 53056750 | 1274-Lng-A-T | 113 | chr3:53056650-53056750 |
| chr3 | 53419950 | 53420050 | 901-Lng-A-T  | 562 | chr3:53419950-53420050 |
| chr3 | 53443350 | 53443450 | 901-Lng-A-T  | 127 | chr3:53443350-53443450 |
| chr3 | 53510650 | 53510750 | 1065-Lng-B-T | 41  | chr3:53510650-53510750 |
| chr3 | 53659250 | 53659350 | 1274-Lng-A-T | 53  | chr3:53659250-53659350 |
| chr3 | 53827850 | 53827950 | 901-Lng-B-T  | 154 | chr3:53827850-53827950 |
| chr3 | 53912150 | 53912250 | 1090-Lng-B-T | 361 | chr3:53912150-53912250 |
| chr3 | 54101650 | 54101750 | 1004-Lng-A-T | 168 | chr3:54101650-54101750 |
| chr3 | 54239050 | 54239150 | 1065-Lng-A-T | 78  | chr3:54239050-54239150 |
| chr3 | 54504250 | 54504350 | 1100-Lng-B-T | 59  | chr3:54504250-54504350 |
| chr3 | 54521850 | 54521950 | 901-Lng-C-T  | 84  | chr3:54521850-54521950 |
| chr3 | 54522550 | 54522650 | 901-Lng-D-T  | 365 | chr3:54522550-54522650 |
| chr3 | 54616050 | 54616150 | 1223-Lng-D-T | 40  | chr3:54616050-54616150 |
| chr3 | 54956450 | 54956550 | 1065-Lng-A-T | 603 | chr3:54956450-54956550 |
| chr3 | 55057150 | 55057250 | 1090-Lng-A-T | 397 | chr3:55057150-55057250 |
| chr3 | 55059550 | 55059650 | 901-Lng-C-T  | 31  | chr3:55059550-55059650 |
| chr3 | 55102050 | 55102150 | 901-Lng-A-T  | 61  | chr3:55102050-55102150 |
| chr3 | 55188550 | 55188650 | 1065-Lng-B-T | 60  | chr3:55188550-55188650 |

**Table S2: SB Insertion regions**

|      |          |          |              |      |                        |
|------|----------|----------|--------------|------|------------------------|
| chr3 | 55238350 | 55238450 | 1223-Lng-D-T | 51   | chr3:55238350-55238450 |
| chr3 | 55428850 | 55428950 | 901-Lng-C-T  | 52   | chr3:55428850-55428950 |
| chr3 | 55466150 | 55466250 | 1167-Lng-A-T | 70   | chr3:55466150-55466250 |
| chr3 | 55547550 | 55547650 | 901-Lng-C-T  | 57   | chr3:55547550-55547650 |
| chr3 | 55560150 | 55560250 | 1152-Lng-A-T | 37   | chr3:55560150-55560250 |
| chr3 | 55590550 | 55590650 | 1072-Lng-A-T | 62   | chr3:55590550-55590650 |
| chr3 | 55634950 | 55635050 | 1152-Lng-A-T | 75   | chr3:55634950-55635050 |
| chr3 | 55643050 | 55643150 | 1151-Lng-A-T | 183  | chr3:55643050-55643150 |
| chr3 | 55665450 | 55665550 | 1065-Lng-C-T | 1835 | chr3:55665450-55665550 |
| chr3 | 55696350 | 55696450 | 1065-Lng-A-T | 76   | chr3:55696350-55696450 |
| chr3 | 55850750 | 55850850 | 1223-Lng-D-T | 42   | chr3:55850750-55850850 |
| chr3 | 56145450 | 56145550 | 1090-Lng-B-T | 217  | chr3:56145450-56145550 |
| chr3 | 56274650 | 56274750 | 901-Lng-D-T  | 187  | chr3:56274650-56274750 |
| chr3 | 56610550 | 56610650 | 1152-Lng-A-T | 83   | chr3:56610550-56610650 |
| chr3 | 56934950 | 56935050 | 1072-Lng-A-T | 59   | chr3:56934950-56935050 |
| chr3 | 56937650 | 56937750 | 846-Lng-A-T  | 44   | chr3:56937650-56937750 |
| chr3 | 57033350 | 57033450 | 1072-Lng-A-T | 73   | chr3:57033350-57033450 |
| chr3 | 57336150 | 57336250 | 1065-Lng-B-T | 95   | chr3:57336150-57336250 |
| chr3 | 57336650 | 57336750 | 1223-Lng-B-T | 41   | chr3:57336650-57336750 |
| chr3 | 57338350 | 57338450 | 1065-Lng-A-T | 82   | chr3:57338350-57338450 |
| chr3 | 57341650 | 57341750 | 1072-Lng-A-T | 54   | chr3:57341650-57341750 |
| chr3 | 57432950 | 57433050 | 1151-Lng-A-T | 54   | chr3:57432950-57433050 |
| chr3 | 57551650 | 57551750 | 1100-Lng-A-T | 137  | chr3:57551650-57551750 |
| chr3 | 57572550 | 57572650 | 1223-Lng-D-T | 51   | chr3:57572550-57572650 |
| chr3 | 57612850 | 57612950 | 1223-Lng-B-T | 277  | chr3:57612850-57612950 |
| chr3 | 57621150 | 57621250 | 1072-Lng-A-T | 49   | chr3:57621150-57621250 |
| chr3 | 57780050 | 57780150 | 1090-Lng-A-T | 419  | chr3:57780050-57780150 |
| chr3 | 57805250 | 57805350 | 901-Lng-A-T  | 68   | chr3:57805250-57805350 |
| chr3 | 58140250 | 58140350 | 1100-Lng-A-T | 61   | chr3:58140250-58140350 |
| chr3 | 58173650 | 58173750 | 1004-Lng-A-T | 625  | chr3:58173650-58173750 |
| chr3 | 58231850 | 58231950 | 1223-Lng-C-T | 88   | chr3:58231850-58231950 |
| chr3 | 58246150 | 58246250 | 1152-Lng-A-T | 85   | chr3:58246150-58246250 |
| chr3 | 58259850 | 58259950 | 1004-Lng-A-T | 105  | chr3:58259850-58259950 |
| chr3 | 58312550 | 58312650 | 901-Lng-C-T  | 66   | chr3:58312550-58312650 |
| chr3 | 58397350 | 58397450 | 1167-Lng-A-T | 56   | chr3:58397350-58397450 |
| chr3 | 58984350 | 58984450 | 1223-Lng-B-T | 180  | chr3:58984350-58984450 |
| chr3 | 59261250 | 59261350 | 1065-Lng-B-T | 39   | chr3:59261250-59261350 |
| chr3 | 59287350 | 59287450 | 1065-Lng-C-T | 129  | chr3:59287350-59287450 |
| chr3 | 59526450 | 59526550 | 901-Lng-D-T  | 688  | chr3:59526450-59526550 |
| chr3 | 59676450 | 59676550 | 1090-Lng-B-T | 323  | chr3:59676450-59676550 |
| chr3 | 59739550 | 59739650 | 1072-Lng-A-T | 54   | chr3:59739550-59739650 |
| chr3 | 59802950 | 59803050 | 901-Lng-D-T  | 195  | chr3:59802950-59803050 |
| chr3 | 59827650 | 59827750 | 1223-Lng-A-T | 51   | chr3:59827650-59827750 |
| chr3 | 59902250 | 59902350 | 1004-Lng-A-T | 57   | chr3:59902250-59902350 |
| chr3 | 59902550 | 59902650 | 1188-Lng-A-T | 133  | chr3:59902550-59902650 |
| chr3 | 60202150 | 60202250 | 901-Lng-B-T  | 186  | chr3:60202150-60202250 |

**Table S2: SB Insertion regions**

|      |          |          |              |      |                        |
|------|----------|----------|--------------|------|------------------------|
| chr3 | 60344050 | 60344150 | 1100-Lng-A-T | 57   | chr3:60344050-60344150 |
| chr3 | 60366350 | 60366450 | 1223-Lng-D-T | 49   | chr3:60366350-60366450 |
| chr3 | 60379050 | 60379150 | 1100-Lng-A-T | 54   | chr3:60379050-60379150 |
| chr3 | 60391850 | 60391950 | 1100-Lng-A-T | 65   | chr3:60391850-60391950 |
| chr3 | 60404050 | 60404150 | 1188-Lng-A-T | 142  | chr3:60404050-60404150 |
| chr3 | 60420450 | 60420550 | 1152-Lng-A-T | 35   | chr3:60420450-60420550 |
| chr3 | 60430050 | 60430150 | 1223-Lng-D-T | 165  | chr3:60430050-60430150 |
| chr3 | 60437850 | 60437950 | 1188-Lng-A-T | 47   | chr3:60437850-60437950 |
| chr3 | 60582650 | 60582750 | 1072-Lng-A-T | 66   | chr3:60582650-60582750 |
| chr3 | 60764250 | 60764350 | 1065-Lng-B-T | 62   | chr3:60764250-60764350 |
| chr3 | 60835250 | 60835350 | 1274-Lng-A-T | 78   | chr3:60835250-60835350 |
| chr3 | 61366950 | 61367050 | 1004-Lng-A-T | 66   | chr3:61366950-61367050 |
| chr3 | 61548250 | 61548350 | 1151-Lng-A-T | 73   | chr3:61548250-61548350 |
| chr3 | 61640950 | 61641050 | 1152-Lng-A-T | 52   | chr3:61640950-61641050 |
| chr3 | 61908450 | 61908550 | 1223-Lng-C-T | 45   | chr3:61908450-61908550 |
| chr3 | 62017850 | 62017950 | 846-Lng-A-T  | 46   | chr3:62017850-62017950 |
| chr3 | 62208250 | 62208350 | 901-Lng-C-T  | 93   | chr3:62208250-62208350 |
| chr3 | 62218350 | 62218450 | 1090-Lng-A-T | 156  | chr3:62218350-62218450 |
| chr3 | 62219350 | 62219450 | 1152-Lng-A-T | 83   | chr3:62219350-62219450 |
| chr3 | 62298050 | 62298150 | 1152-Lng-A-T | 97   | chr3:62298050-62298150 |
| chr3 | 62308850 | 62308950 | 1090-Lng-A-T | 83   | chr3:62308850-62308950 |
| chr3 | 62475550 | 62475650 | 1100-Lng-A-T | 97   | chr3:62475550-62475650 |
| chr3 | 62629350 | 62629450 | 846-Lng-A-T  | 115  | chr3:62629350-62629450 |
| chr3 | 62781550 | 62781650 | 846-Lng-A-T  | 195  | chr3:62781550-62781650 |
| chr3 | 63082450 | 63082550 | 1223-Lng-C-T | 48   | chr3:63082450-63082550 |
| chr3 | 63090850 | 63090950 | 1100-Lng-B-T | 113  | chr3:63090850-63090950 |
| chr3 | 63105150 | 63105250 | 1274-Lng-A-T | 61   | chr3:63105150-63105250 |
| chr3 | 63112450 | 63112550 | 1065-Lng-A-T | 43   | chr3:63112450-63112550 |
| chr3 | 63172950 | 63173050 | 1223-Lng-A-T | 134  | chr3:63172950-63173050 |
| chr3 | 63182850 | 63182950 | 1274-Lng-A-T | 49   | chr3:63182850-63182950 |
| chr3 | 63260850 | 63260950 | 1065-Lng-A-T | 59   | chr3:63260850-63260950 |
| chr3 | 63419950 | 63420050 | 1188-Lng-A-T | 90   | chr3:63419950-63420050 |
| chr3 | 63501350 | 63501450 | 1223-Lng-D-T | 41   | chr3:63501350-63501450 |
| chr3 | 63680350 | 63680450 | 1065-Lng-C-T | 2025 | chr3:63680350-63680450 |
| chr3 | 63699050 | 63699150 | 901-Lng-C-T  | 60   | chr3:63699050-63699150 |
| chr3 | 63708950 | 63709050 | 846-Lng-A-T  | 216  | chr3:63708950-63709050 |
| chr3 | 63734550 | 63734650 | 1072-Lng-A-T | 72   | chr3:63734550-63734650 |
| chr3 | 63802450 | 63802550 | 1072-Lng-A-T | 125  | chr3:63802450-63802550 |
| chr3 | 64092850 | 64092950 | 1274-Lng-A-T | 129  | chr3:64092850-64092950 |
| chr3 | 64093750 | 64093850 | 1152-Lng-A-T | 161  | chr3:64093750-64093850 |
| chr3 | 64182250 | 64182350 | 1072-Lng-A-T | 259  | chr3:64182250-64182350 |
| chr3 | 64244550 | 64244650 | 901-Lng-C-T  | 52   | chr3:64244550-64244650 |
| chr3 | 65121050 | 65121150 | 1065-Lng-A-T | 50   | chr3:65121050-65121150 |
| chr3 | 65181450 | 65181550 | 1223-Lng-B-T | 42   | chr3:65181450-65181550 |
| chr3 | 65353950 | 65354050 | 1223-Lng-D-T | 49   | chr3:65353950-65354050 |
| chr3 | 65354050 | 65354150 | 1274-Lng-A-T | 121  | chr3:65354050-65354150 |

**Table S2: SB Insertion regions**

|      |          |          |              |      |                        |
|------|----------|----------|--------------|------|------------------------|
| chr3 | 65364450 | 65364550 | 1167-Lng-A-T | 113  | chr3:65364450-65364550 |
| chr3 | 65895050 | 65895150 | 1151-Lng-A-T | 663  | chr3:65895050-65895150 |
| chr3 | 66170750 | 66170850 | 901-Lng-C-T  | 42   | chr3:66170750-66170850 |
| chr3 | 66312350 | 66312450 | 846-Lng-A-T  | 91   | chr3:66312350-66312450 |
| chr3 | 66410450 | 66410550 | 1223-Lng-B-T | 151  | chr3:66410450-66410550 |
| chr3 | 66859450 | 66859550 | 901-Lng-A-T  | 466  | chr3:66859450-66859550 |
| chr3 | 67082350 | 67082450 | 1223-Lng-D-T | 40   | chr3:67082350-67082450 |
| chr3 | 67253250 | 67253350 | 1065-Lng-B-T | 57   | chr3:67253250-67253350 |
| chr3 | 67393750 | 67393850 | 1100-Lng-B-T | 74   | chr3:67393750-67393850 |
| chr3 | 67449150 | 67449250 | 1188-Lng-A-T | 58   | chr3:67449150-67449250 |
| chr3 | 67520450 | 67520550 | 901-Lng-D-T  | 127  | chr3:67520450-67520550 |
| chr3 | 67743250 | 67743350 | 1223-Lng-C-T | 45   | chr3:67743250-67743350 |
| chr3 | 67954050 | 67954150 | 1004-Lng-A-T | 76   | chr3:67954050-67954150 |
| chr3 | 68144450 | 68144550 | 901-Lng-C-T  | 48   | chr3:68144450-68144550 |
| chr3 | 68273850 | 68273950 | 901-Lng-D-T  | 484  | chr3:68273850-68273950 |
| chr3 | 68335950 | 68336050 | 1188-Lng-A-T | 37   | chr3:68335950-68336050 |
| chr3 | 68446750 | 68446850 | 1072-Lng-A-T | 56   | chr3:68446750-68446850 |
| chr3 | 68448350 | 68448450 | 846-Lng-A-T  | 91   | chr3:68448350-68448450 |
| chr3 | 68663650 | 68663750 | 1152-Lng-A-T | 82   | chr3:68663650-68663750 |
| chr3 | 68840350 | 68840450 | 901-Lng-D-T  | 422  | chr3:68840350-68840450 |
| chr3 | 68844150 | 68844250 | 901-Lng-D-T  | 183  | chr3:68844150-68844250 |
| chr3 | 68858750 | 68858850 | 1152-Lng-A-T | 34   | chr3:68858750-68858850 |
| chr3 | 68868450 | 68868550 | 1223-Lng-B-T | 47   | chr3:68868450-68868550 |
| chr3 | 68876350 | 68876450 | 1065-Lng-A-T | 84   | chr3:68876350-68876450 |
| chr3 | 68892850 | 68892950 | 1167-Lng-A-T | 70   | chr3:68892850-68892950 |
| chr3 | 68893050 | 68893150 | 1065-Lng-B-T | 65   | chr3:68893050-68893150 |
| chr3 | 68910050 | 68910150 | 1100-Lng-B-T | 5539 | chr3:68910050-68910150 |
| chr3 | 68912350 | 68912450 | 1065-Lng-A-T | 51   | chr3:68912350-68912450 |
| chr3 | 68927750 | 68927850 | 1152-Lng-A-T | 128  | chr3:68927750-68927850 |
| chr3 | 69178350 | 69178450 | 901-Lng-B-T  | 80   | chr3:69178350-69178450 |
| chr3 | 69541250 | 69541350 | 1223-Lng-B-T | 41   | chr3:69541250-69541350 |
| chr3 | 69558250 | 69558350 | 1090-Lng-B-T | 659  | chr3:69558250-69558350 |
| chr3 | 69930350 | 69930450 | 1065-Lng-A-T | 36   | chr3:69930350-69930450 |
| chr3 | 69976750 | 69976850 | 1004-Lng-A-T | 55   | chr3:69976750-69976850 |
| chr3 | 70605750 | 70605850 | 1072-Lng-A-T | 78   | chr3:70605750-70605850 |
| chr3 | 70726050 | 70726150 | 1090-Lng-A-T | 94   | chr3:70726050-70726150 |
| chr3 | 70876750 | 70876850 | 1167-Lng-A-T | 82   | chr3:70876750-70876850 |
| chr3 | 70935250 | 70935350 | 1188-Lng-A-T | 50   | chr3:70935250-70935350 |
| chr3 | 70946750 | 70946850 | 1223-Lng-D-T | 40   | chr3:70946750-70946850 |
| chr3 | 71030350 | 71030450 | 1151-Lng-A-T | 420  | chr3:71030350-71030450 |
| chr3 | 71165350 | 71165450 | 1090-Lng-A-T | 1288 | chr3:71165350-71165450 |
| chr3 | 71426450 | 71426550 | 1072-Lng-A-T | 98   | chr3:71426450-71426550 |
| chr3 | 71489650 | 71489750 | 1152-Lng-A-T | 242  | chr3:71489650-71489750 |
| chr3 | 71654050 | 71654150 | 1167-Lng-A-T | 96   | chr3:71654050-71654150 |
| chr3 | 71997950 | 71998050 | 1065-Lng-B-T | 100  | chr3:71997950-71998050 |
| chr3 | 72002050 | 72002150 | 1004-Lng-A-T | 66   | chr3:72002050-72002150 |

**Table S2: SB Insertion regions**

|      |          |          |              |     |                        |
|------|----------|----------|--------------|-----|------------------------|
| chr3 | 72046450 | 72046550 | 1072-Lng-A-T | 52  | chr3:72046450-72046550 |
| chr3 | 72195750 | 72195850 | 901-Lng-C-T  | 55  | chr3:72195750-72195850 |
| chr3 | 72443450 | 72443550 | 1072-Lng-A-T | 143 | chr3:72443450-72443550 |
| chr3 | 72458150 | 72458250 | 1223-Lng-C-T | 60  | chr3:72458150-72458250 |
| chr3 | 73019650 | 73019750 | 1223-Lng-B-T | 41  | chr3:73019650-73019750 |
| chr3 | 73418850 | 73418950 | 846-Lng-A-T  | 54  | chr3:73418850-73418950 |
| chr3 | 74014250 | 74014350 | 1152-Lng-A-T | 47  | chr3:74014250-74014350 |
| chr3 | 74055750 | 74055850 | 1072-Lng-A-T | 49  | chr3:74055750-74055850 |
| chr3 | 74107950 | 74108050 | 1151-Lng-A-T | 55  | chr3:74107950-74108050 |
| chr3 | 74125850 | 74125950 | 1188-Lng-A-T | 41  | chr3:74125850-74125950 |
| chr3 | 74251650 | 74251750 | 1188-Lng-A-T | 164 | chr3:74251650-74251750 |
| chr3 | 74348250 | 74348350 | 1223-Lng-B-T | 41  | chr3:74348250-74348350 |
| chr3 | 74410350 | 74410450 | 901-Lng-D-T  | 205 | chr3:74410350-74410450 |
| chr3 | 74437950 | 74438050 | 901-Lng-A-T  | 54  | chr3:74437950-74438050 |
| chr3 | 74483550 | 74483650 | 901-Lng-A-T  | 75  | chr3:74483550-74483650 |
| chr3 | 74603150 | 74603250 | 1072-Lng-A-T | 98  | chr3:74603150-74603250 |
| chr3 | 74868150 | 74868250 | 901-Lng-B-T  | 49  | chr3:74868150-74868250 |
| chr3 | 74878150 | 74878250 | 1100-Lng-A-T | 56  | chr3:74878150-74878250 |
| chr3 | 74886050 | 74886150 | 1072-Lng-A-T | 51  | chr3:74886050-74886150 |
| chr3 | 74914950 | 74915050 | 1223-Lng-B-T | 174 | chr3:74914950-74915050 |
| chr3 | 75041750 | 75041850 | 1090-Lng-A-T | 57  | chr3:75041750-75041850 |
| chr3 | 75212450 | 75212550 | 1274-Lng-A-T | 116 | chr3:75212450-75212550 |
| chr3 | 75333450 | 75333550 | 1152-Lng-A-T | 121 | chr3:75333450-75333550 |
| chr3 | 75336750 | 75336850 | 1100-Lng-A-T | 100 | chr3:75336750-75336850 |
| chr3 | 75344850 | 75344950 | 901-Lng-A-T  | 58  | chr3:75344850-75344950 |
| chr3 | 75344850 | 75344950 | 1072-Lng-A-T | 56  | chr3:75344850-75344950 |
| chr3 | 75677550 | 75677650 | 1065-Lng-B-T | 39  | chr3:75677550-75677650 |
| chr3 | 75704650 | 75704750 | 1065-Lng-A-T | 46  | chr3:75704650-75704750 |
| chr3 | 75726450 | 75726550 | 1065-Lng-A-T | 43  | chr3:75726450-75726550 |
| chr3 | 75879350 | 75879450 | 1065-Lng-A-T | 79  | chr3:75879350-75879450 |
| chr3 | 76128250 | 76128350 | 1072-Lng-A-T | 84  | chr3:76128250-76128350 |
| chr3 | 76365450 | 76365550 | 901-Lng-B-T  | 122 | chr3:76365450-76365550 |
| chr3 | 76557050 | 76557150 | 1090-Lng-A-T | 150 | chr3:76557050-76557150 |
| chr3 | 76606150 | 76606250 | 1100-Lng-A-T | 65  | chr3:76606150-76606250 |
| chr3 | 76815950 | 76816050 | 901-Lng-A-T  | 93  | chr3:76815950-76816050 |
| chr3 | 77151750 | 77151850 | 1152-Lng-A-T | 69  | chr3:77151750-77151850 |
| chr3 | 77152750 | 77152850 | 846-Lng-A-T  | 44  | chr3:77152750-77152850 |
| chr3 | 77175750 | 77175850 | 1004-Lng-A-T | 71  | chr3:77175750-77175850 |
| chr3 | 77493050 | 77493150 | 1152-Lng-A-T | 32  | chr3:77493050-77493150 |
| chr3 | 77631250 | 77631350 | 1223-Lng-B-T | 54  | chr3:77631250-77631350 |
| chr3 | 77645650 | 77645750 | 1152-Lng-A-T | 40  | chr3:77645650-77645750 |
| chr3 | 77704050 | 77704150 | 1004-Lng-A-T | 113 | chr3:77704050-77704150 |
| chr3 | 77767050 | 77767150 | 901-Lng-B-T  | 131 | chr3:77767050-77767150 |
| chr3 | 77849350 | 77849450 | 1004-Lng-A-T | 67  | chr3:77849350-77849450 |
| chr3 | 77964950 | 77965050 | 1065-Lng-B-T | 46  | chr3:77964950-77965050 |
| chr3 | 78135250 | 78135350 | 1100-Lng-A-T | 53  | chr3:78135250-78135350 |

**Table S2: SB Insertion regions**

|      |          |          |              |      |                        |
|------|----------|----------|--------------|------|------------------------|
| chr3 | 78731150 | 78731250 | 1188-Lng-A-T | 38   | chr3:78731150-78731250 |
| chr3 | 78889550 | 78889650 | 901-Lng-A-T  | 72   | chr3:78889550-78889650 |
| chr3 | 78957650 | 78957750 | 901-Lng-A-T  | 487  | chr3:78957650-78957750 |
| chr3 | 78969250 | 78969350 | 846-Lng-A-T  | 88   | chr3:78969250-78969350 |
| chr3 | 79023250 | 79023350 | 846-Lng-A-T  | 86   | chr3:79023250-79023350 |
| chr3 | 79077950 | 79078050 | 1065-Lng-A-T | 68   | chr3:79077950-79078050 |
| chr3 | 79415250 | 79415350 | 1065-Lng-C-T | 65   | chr3:79415250-79415350 |
| chr3 | 79565450 | 79565550 | 901-Lng-A-T  | 359  | chr3:79565450-79565550 |
| chr3 | 79668850 | 79668950 | 1223-Lng-B-T | 44   | chr3:79668850-79668950 |
| chr3 | 79880650 | 79880750 | 901-Lng-A-T  | 133  | chr3:79880650-79880750 |
| chr3 | 79886450 | 79886550 | 1065-Lng-B-T | 40   | chr3:79886450-79886550 |
| chr3 | 79920650 | 79920750 | 901-Lng-A-T  | 50   | chr3:79920650-79920750 |
| chr3 | 80016550 | 80016650 | 901-Lng-A-T  | 104  | chr3:80016550-80016650 |
| chr3 | 80087350 | 80087450 | 1151-Lng-A-T | 189  | chr3:80087350-80087450 |
| chr3 | 80286150 | 80286250 | 1167-Lng-A-T | 46   | chr3:80286150-80286250 |
| chr3 | 80482650 | 80482750 | 1090-Lng-A-T | 117  | chr3:80482650-80482750 |
| chr3 | 80483950 | 80484050 | 901-Lng-B-T  | 238  | chr3:80483950-80484050 |
| chr3 | 80588950 | 80589050 | 901-Lng-C-T  | 44   | chr3:80588950-80589050 |
| chr3 | 80618450 | 80618550 | 1100-Lng-A-T | 64   | chr3:80618450-80618550 |
| chr3 | 80948250 | 80948350 | 1223-Lng-C-T | 64   | chr3:80948250-80948350 |
| chr3 | 81132350 | 81132450 | 901-Lng-A-T  | 65   | chr3:81132350-81132450 |
| chr3 | 81187350 | 81187450 | 1072-Lng-A-T | 72   | chr3:81187350-81187450 |
| chr3 | 81223750 | 81223850 | 1167-Lng-A-T | 69   | chr3:81223750-81223850 |
| chr3 | 81226750 | 81226850 | 1065-Lng-A-T | 46   | chr3:81226750-81226850 |
| chr3 | 81331950 | 81332050 | 1274-Lng-A-T | 96   | chr3:81331950-81332050 |
| chr3 | 81410750 | 81410850 | 1004-Lng-A-T | 531  | chr3:81410750-81410850 |
| chr3 | 81451550 | 81451650 | 1004-Lng-A-T | 53   | chr3:81451550-81451650 |
| chr3 | 81478450 | 81478550 | 1072-Lng-A-T | 53   | chr3:81478450-81478550 |
| chr3 | 81576550 | 81576650 | 1223-Lng-C-T | 54   | chr3:81576550-81576650 |
| chr3 | 81932150 | 81932250 | 1065-Lng-A-T | 76   | chr3:81932150-81932250 |
| chr3 | 81986350 | 81986450 | 1167-Lng-A-T | 49   | chr3:81986350-81986450 |
| chr3 | 82403350 | 82403450 | 1065-Lng-A-T | 71   | chr3:82403350-82403450 |
| chr3 | 82428150 | 82428250 | 901-Lng-D-T  | 374  | chr3:82428150-82428250 |
| chr3 | 82521350 | 82521450 | 1223-Lng-B-T | 53   | chr3:82521350-82521450 |
| chr3 | 82855950 | 82856050 | 901-Lng-D-T  | 39   | chr3:82855950-82856050 |
| chr3 | 82884950 | 82885050 | 1223-Lng-B-T | 191  | chr3:82884950-82885050 |
| chr3 | 83118050 | 83118150 | 901-Lng-D-T  | 42   | chr3:83118050-83118150 |
| chr3 | 83242950 | 83243050 | 1004-Lng-A-T | 63   | chr3:83242950-83243050 |
| chr3 | 83276750 | 83276850 | 1223-Lng-A-T | 167  | chr3:83276750-83276850 |
| chr3 | 83420850 | 83420950 | 1100-Lng-A-T | 92   | chr3:83420850-83420950 |
| chr3 | 83746950 | 83747050 | 846-Lng-A-T  | 1710 | chr3:83746950-83747050 |
| chr3 | 83748250 | 83748350 | 1065-Lng-C-T | 100  | chr3:83748250-83748350 |
| chr3 | 83863050 | 83863150 | 1188-Lng-A-T | 63   | chr3:83863050-83863150 |
| chr3 | 83896950 | 83897050 | 1223-Lng-B-T | 43   | chr3:83896950-83897050 |
| chr3 | 84043050 | 84043150 | 901-Lng-A-T  | 72   | chr3:84043050-84043150 |
| chr3 | 84054450 | 84054550 | 1167-Lng-A-T | 259  | chr3:84054450-84054550 |

**Table S2: SB Insertion regions**

|      |          |          |              |     |                        |
|------|----------|----------|--------------|-----|------------------------|
| chr3 | 84085450 | 84085550 | 1004-Lng-A-T | 390 | chr3:84085450-84085550 |
| chr3 | 84213150 | 84213250 | 1274-Lng-A-T | 68  | chr3:84213150-84213250 |
| chr3 | 84294350 | 84294450 | 901-Lng-B-T  | 142 | chr3:84294350-84294450 |
| chr3 | 84316550 | 84316650 | 1223-Lng-C-T | 43  | chr3:84316550-84316650 |
| chr3 | 84345450 | 84345550 | 1274-Lng-A-T | 55  | chr3:84345450-84345550 |
| chr3 | 84456550 | 84456650 | 901-Lng-B-T  | 37  | chr3:84456550-84456650 |
| chr3 | 84466550 | 84466650 | 901-Lng-C-T  | 60  | chr3:84466550-84466650 |
| chr3 | 84666550 | 84666650 | 1100-Lng-A-T | 89  | chr3:84666550-84666650 |
| chr3 | 84681650 | 84681750 | 1004-Lng-A-T | 138 | chr3:84681650-84681750 |
| chr3 | 84703850 | 84703950 | 1223-Lng-D-T | 54  | chr3:84703850-84703950 |
| chr3 | 84712050 | 84712150 | 1004-Lng-A-T | 50  | chr3:84712050-84712150 |
| chr3 | 84746750 | 84746850 | 1065-Lng-C-T | 64  | chr3:84746750-84746850 |
| chr3 | 85459450 | 85459550 | 1223-Lng-B-T | 42  | chr3:85459450-85459550 |
| chr3 | 85587850 | 85587950 | 1065-Lng-A-T | 61  | chr3:85587850-85587950 |
| chr3 | 85600950 | 85601050 | 1090-Lng-A-T | 47  | chr3:85600950-85601050 |
| chr3 | 85673550 | 85673650 | 901-Lng-A-T  | 72  | chr3:85673550-85673650 |
| chr3 | 85830350 | 85830450 | 1100-Lng-A-T | 55  | chr3:85830350-85830450 |
| chr3 | 85920650 | 85920750 | 1167-Lng-A-T | 63  | chr3:85920650-85920750 |
| chr3 | 85990950 | 85991050 | 1065-Lng-B-T | 48  | chr3:85990950-85991050 |
| chr3 | 86012350 | 86012450 | 1065-Lng-C-T | 145 | chr3:86012350-86012450 |
| chr3 | 86075150 | 86075250 | 1065-Lng-B-T | 51  | chr3:86075150-86075250 |
| chr3 | 86148350 | 86148450 | 1152-Lng-A-T | 54  | chr3:86148350-86148450 |
| chr3 | 86311950 | 86312050 | 1274-Lng-A-T | 76  | chr3:86311950-86312050 |
| chr3 | 86419950 | 86420050 | 901-Lng-D-T  | 304 | chr3:86419950-86420050 |
| chr3 | 86439350 | 86439450 | 1090-Lng-B-T | 732 | chr3:86439350-86439450 |
| chr3 | 86473150 | 86473250 | 1223-Lng-A-T | 158 | chr3:86473150-86473250 |
| chr3 | 86476850 | 86476950 | 901-Lng-A-T  | 184 | chr3:86476850-86476950 |
| chr3 | 86489450 | 86489550 | 1065-Lng-A-T | 55  | chr3:86489450-86489550 |
| chr3 | 86507250 | 86507350 | 1223-Lng-A-T | 172 | chr3:86507250-86507350 |
| chr3 | 86525550 | 86525650 | 1004-Lng-A-T | 53  | chr3:86525550-86525650 |
| chr3 | 86529350 | 86529450 | 1223-Lng-D-T | 172 | chr3:86529350-86529450 |
| chr3 | 86539450 | 86539550 | 1090-Lng-A-T | 108 | chr3:86539450-86539550 |
| chr3 | 86569550 | 86569650 | 1223-Lng-A-T | 152 | chr3:86569550-86569650 |
| chr3 | 87104250 | 87104350 | 1004-Lng-A-T | 534 | chr3:87104250-87104350 |
| chr3 | 87477050 | 87477150 | 1223-Lng-A-T | 67  | chr3:87477050-87477150 |
| chr3 | 87479750 | 87479850 | 1274-Lng-A-T | 49  | chr3:87479750-87479850 |
| chr3 | 87588550 | 87588650 | 1072-Lng-A-T | 103 | chr3:87588550-87588650 |
| chr3 | 87940350 | 87940450 | 1100-Lng-A-T | 53  | chr3:87940350-87940450 |
| chr3 | 87956450 | 87956550 | 1072-Lng-A-T | 86  | chr3:87956450-87956550 |
| chr3 | 87961450 | 87961550 | 1152-Lng-A-T | 48  | chr3:87961450-87961550 |
| chr3 | 87984850 | 87984950 | 1090-Lng-A-T | 85  | chr3:87984850-87984950 |
| chr3 | 88083250 | 88083350 | 901-Lng-A-T  | 95  | chr3:88083250-88083350 |
| chr3 | 88124550 | 88124650 | 1274-Lng-A-T | 50  | chr3:88124550-88124650 |
| chr3 | 88183150 | 88183250 | 1274-Lng-A-T | 201 | chr3:88183150-88183250 |
| chr3 | 88310550 | 88310650 | 1151-Lng-A-T | 99  | chr3:88310550-88310650 |
| chr3 | 88509350 | 88509450 | 1004-Lng-A-T | 74  | chr3:88509350-88509450 |

**Table S2: SB Insertion regions**

|      |          |          |              |      |                        |
|------|----------|----------|--------------|------|------------------------|
| chr3 | 88643450 | 88643550 | 1274-Lng-A-T | 91   | chr3:88643450-88643550 |
| chr3 | 88666550 | 88666650 | 1167-Lng-A-T | 81   | chr3:88666550-88666650 |
| chr3 | 88705650 | 88705750 | 1151-Lng-A-T | 77   | chr3:88705650-88705750 |
| chr3 | 88714350 | 88714450 | 1065-Lng-C-T | 1987 | chr3:88714350-88714450 |
| chr3 | 88719950 | 88720050 | 1065-Lng-B-T | 75   | chr3:88719950-88720050 |
| chr3 | 88781750 | 88781850 | 1065-Lng-A-T | 144  | chr3:88781750-88781850 |
| chr3 | 88810750 | 88810850 | 901-Lng-A-T  | 229  | chr3:88810750-88810850 |
| chr3 | 88859150 | 88859250 | 901-Lng-A-T  | 272  | chr3:88859150-88859250 |
| chr3 | 89229050 | 89229150 | 901-Lng-D-T  | 108  | chr3:89229050-89229150 |
| chr3 | 89271550 | 89271650 | 901-Lng-C-T  | 52   | chr3:89271550-89271650 |
| chr3 | 89389350 | 89389450 | 1152-Lng-A-T | 94   | chr3:89389350-89389450 |
| chr3 | 89474650 | 89474750 | 901-Lng-C-T  | 44   | chr3:89474650-89474750 |
| chr3 | 89801250 | 89801350 | 1223-Lng-A-T | 147  | chr3:89801250-89801350 |
| chr3 | 89818050 | 89818150 | 1152-Lng-A-T | 36   | chr3:89818050-89818150 |
| chr3 | 89831450 | 89831550 | 1065-Lng-C-T | 99   | chr3:89831450-89831550 |
| chr3 | 89841650 | 89841750 | 1223-Lng-A-T | 164  | chr3:89841650-89841750 |
| chr3 | 89849950 | 89850050 | 1065-Lng-A-T | 76   | chr3:89849950-89850050 |
| chr3 | 89898650 | 89898750 | 1090-Lng-A-T | 70   | chr3:89898650-89898750 |
| chr3 | 89905950 | 89906050 | 1188-Lng-A-T | 249  | chr3:89905950-89906050 |
| chr3 | 89977150 | 89977250 | 1274-Lng-A-T | 113  | chr3:89977150-89977250 |
| chr3 | 90120750 | 90120850 | 1188-Lng-A-T | 37   | chr3:90120750-90120850 |
| chr3 | 90127250 | 90127350 | 1065-Lng-A-T | 69   | chr3:90127250-90127350 |
| chr3 | 90128450 | 90128550 | 1188-Lng-A-T | 124  | chr3:90128450-90128550 |
| chr3 | 90156250 | 90156350 | 1274-Lng-A-T | 155  | chr3:90156250-90156350 |
| chr3 | 90312050 | 90312150 | 1065-Lng-A-T | 39   | chr3:90312050-90312150 |
| chr3 | 90326250 | 90326350 | 901-Lng-A-T  | 68   | chr3:90326250-90326350 |
| chr3 | 90342550 | 90342650 | 901-Lng-A-T  | 121  | chr3:90342550-90342650 |
| chr3 | 90633750 | 90633850 | 1065-Lng-B-T | 66   | chr3:90633750-90633850 |
| chr3 | 90749950 | 90750050 | 901-Lng-D-T  | 150  | chr3:90749950-90750050 |
| chr3 | 90853050 | 90853150 | 1188-Lng-A-T | 59   | chr3:90853050-90853150 |
| chr3 | 91062950 | 91063050 | 1065-Lng-C-T | 143  | chr3:91062950-91063050 |
| chr3 | 91106450 | 91106550 | 1151-Lng-A-T | 64   | chr3:91106450-91106550 |
| chr3 | 91218250 | 91218350 | 1004-Lng-A-T | 59   | chr3:91218250-91218350 |
| chr3 | 92459150 | 92459250 | 1004-Lng-A-T | 69   | chr3:92459150-92459250 |
| chr3 | 92469650 | 92469750 | 901-Lng-C-T  | 61   | chr3:92469650-92469750 |
| chr3 | 92645350 | 92645450 | 1152-Lng-A-T | 127  | chr3:92645350-92645450 |
| chr3 | 92787750 | 92787850 | 1100-Lng-A-T | 99   | chr3:92787750-92787850 |
| chr3 | 93071050 | 93071150 | 901-Lng-A-T  | 60   | chr3:93071050-93071150 |
| chr3 | 93183750 | 93183850 | 901-Lng-A-T  | 67   | chr3:93183750-93183850 |
| chr3 | 93374850 | 93374950 | 1100-Lng-A-T | 196  | chr3:93374850-93374950 |
| chr3 | 93487650 | 93487750 | 1152-Lng-A-T | 61   | chr3:93487650-93487750 |
| chr3 | 93678450 | 93678550 | 1004-Lng-A-T | 167  | chr3:93678450-93678550 |
| chr3 | 94202650 | 94202750 | 1274-Lng-A-T | 168  | chr3:94202650-94202750 |
| chr3 | 94304750 | 94304850 | 1100-Lng-B-T | 57   | chr3:94304750-94304850 |
| chr3 | 94313450 | 94313550 | 901-Lng-D-T  | 151  | chr3:94313450-94313550 |
| chr3 | 94315850 | 94315950 | 1100-Lng-A-T | 60   | chr3:94315850-94315950 |



**Table S2: SB Insertion regions**

|      |          |          |              |     |                        |
|------|----------|----------|--------------|-----|------------------------|
| chr3 | 94321450 | 94321550 | 1090-Lng-A-T | 161 | chr3:94321450-94321550 |
| chr3 | 94365150 | 94365250 | 1274-Lng-A-T | 689 | chr3:94365150-94365250 |
| chr3 | 94456850 | 94456950 | 1274-Lng-A-T | 78  | chr3:94456850-94456950 |
| chr3 | 94461750 | 94461850 | 1100-Lng-A-T | 82  | chr3:94461750-94461850 |
| chr3 | 94655950 | 94656050 | 1223-Lng-C-T | 123 | chr3:94655950-94656050 |
| chr3 | 94667150 | 94667250 | 1152-Lng-A-T | 38  | chr3:94667150-94667250 |
| chr3 | 94723050 | 94723150 | 1167-Lng-A-T | 164 | chr3:94723050-94723150 |
| chr3 | 94740950 | 94741050 | 1223-Lng-D-T | 424 | chr3:94740950-94741050 |
| chr3 | 94807550 | 94807650 | 901-Lng-C-T  | 42  | chr3:94807550-94807650 |
| chr3 | 94833250 | 94833350 | 1274-Lng-A-T | 58  | chr3:94833250-94833350 |
| chr3 | 95015550 | 95015650 | 1151-Lng-A-T | 62  | chr3:95015550-95015650 |
| chr3 | 95020750 | 95020850 | 1274-Lng-A-T | 51  | chr3:95020750-95020850 |
| chr3 | 95065750 | 95065850 | 1223-Lng-D-T | 53  | chr3:95065750-95065850 |
| chr3 | 95068550 | 95068650 | 1274-Lng-A-T | 54  | chr3:95068550-95068650 |
| chr3 | 95087950 | 95088050 | 901-Lng-D-T  | 237 | chr3:95087950-95088050 |
| chr3 | 95104050 | 95104150 | 1274-Lng-A-T | 82  | chr3:95104050-95104150 |
| chr3 | 95254350 | 95254450 | 901-Lng-D-T  | 299 | chr3:95254350-95254450 |
| chr3 | 95259550 | 95259650 | 1065-Lng-C-T | 95  | chr3:95259550-95259650 |
| chr3 | 95262850 | 95262950 | 1223-Lng-B-T | 117 | chr3:95262850-95262950 |
| chr3 | 95364350 | 95364450 | 1223-Lng-B-T | 515 | chr3:95364350-95364450 |
| chr3 | 95397650 | 95397750 | 1072-Lng-A-T | 108 | chr3:95397650-95397750 |
| chr3 | 95464750 | 95464850 | 1151-Lng-A-T | 64  | chr3:95464750-95464850 |
| chr3 | 95502650 | 95502750 | 901-Lng-A-T  | 57  | chr3:95502650-95502750 |
| chr3 | 95533450 | 95533550 | 901-Lng-A-T  | 82  | chr3:95533450-95533550 |
| chr3 | 95676450 | 95676550 | 1151-Lng-A-T | 362 | chr3:95676450-95676550 |
| chr3 | 95677650 | 95677750 | 1274-Lng-A-T | 125 | chr3:95677650-95677750 |
| chr3 | 95694850 | 95694950 | 1274-Lng-A-T | 69  | chr3:95694850-95694950 |
| chr3 | 95882950 | 95883050 | 1065-Lng-A-T | 52  | chr3:95882950-95883050 |
| chr3 | 95943150 | 95943250 | 1223-Lng-A-T | 585 | chr3:95943150-95943250 |
| chr3 | 95950350 | 95950450 | 901-Lng-B-T  | 140 | chr3:95950350-95950450 |
| chr3 | 97015650 | 97015750 | 1274-Lng-A-T | 49  | chr3:97015650-97015750 |
| chr3 | 97363450 | 97363550 | 1152-Lng-A-T | 89  | chr3:97363450-97363550 |
| chr3 | 97447250 | 97447350 | 1223-Lng-D-T | 55  | chr3:97447250-97447350 |
| chr3 | 97491150 | 97491250 | 1274-Lng-A-T | 81  | chr3:97491150-97491250 |
| chr3 | 97505150 | 97505250 | 1065-Lng-B-T | 95  | chr3:97505150-97505250 |
| chr3 | 97565850 | 97565950 | 901-Lng-A-T  | 139 | chr3:97565850-97565950 |
| chr3 | 97604350 | 97604450 | 1151-Lng-A-T | 179 | chr3:97604350-97604450 |
| chr3 | 97707950 | 97708050 | 901-Lng-B-T  | 154 | chr3:97707950-97708050 |
| chr3 | 97858150 | 97858250 | 1090-Lng-A-T | 52  | chr3:97858150-97858250 |
| chr3 | 97869750 | 97869850 | 1152-Lng-A-T | 445 | chr3:97869750-97869850 |
| chr3 | 97874650 | 97874750 | 1072-Lng-A-T | 125 | chr3:97874650-97874750 |
| chr3 | 97910350 | 97910450 | 1100-Lng-A-T | 170 | chr3:97910350-97910450 |
| chr3 | 97916550 | 97916650 | 1223-Lng-B-T | 54  | chr3:97916550-97916650 |
| chr3 | 97953050 | 97953150 | 901-Lng-B-T  | 98  | chr3:97953050-97953150 |
| chr3 | 98144050 | 98144150 | 1274-Lng-A-T | 124 | chr3:98144050-98144150 |
| chr3 | 98189850 | 98189950 | 1151-Lng-A-T | 87  | chr3:98189850-98189950 |

**Table S2: SB Insertion regions**

|      |           |           |              |     |                          |
|------|-----------|-----------|--------------|-----|--------------------------|
| chr3 | 98450850  | 98450950  | 1065-Lng-B-T | 51  | chr3:98450850-98450950   |
| chr3 | 98592650  | 98592750  | 1090-Lng-A-T | 505 | chr3:98592650-98592750   |
| chr3 | 98642950  | 98643050  | 901-Lng-A-T  | 160 | chr3:98642950-98643050   |
| chr3 | 98677450  | 98677550  | 1065-Lng-B-T | 49  | chr3:98677450-98677550   |
| chr3 | 98737250  | 98737350  | 1065-Lng-B-T | 99  | chr3:98737250-98737350   |
| chr3 | 98777850  | 98777950  | 1223-Lng-A-T | 198 | chr3:98777850-98777950   |
| chr3 | 99011150  | 99011250  | 1065-Lng-C-T | 90  | chr3:99011150-99011250   |
| chr3 | 99032550  | 99032650  | 1223-Lng-A-T | 287 | chr3:99032550-99032650   |
| chr3 | 99049250  | 99049350  | 1274-Lng-A-T | 94  | chr3:99049250-99049350   |
| chr3 | 99498750  | 99498850  | 1090-Lng-A-T | 149 | chr3:99498750-99498850   |
| chr3 | 99528750  | 99528850  | 1090-Lng-A-T | 81  | chr3:99528750-99528850   |
| chr3 | 99539050  | 99539150  | 1151-Lng-A-T | 63  | chr3:99539050-99539150   |
| chr3 | 99540650  | 99540750  | 1152-Lng-A-T | 36  | chr3:99540650-99540750   |
| chr3 | 99669850  | 99669950  | 1152-Lng-A-T | 101 | chr3:99669850-99669950   |
| chr3 | 100138150 | 100138250 | 1152-Lng-A-T | 101 | chr3:100138150-100138250 |
| chr3 | 100385750 | 100385850 | 1065-Lng-B-T | 107 | chr3:100385750-100385850 |
| chr3 | 100395950 | 100396050 | 1072-Lng-A-T | 142 | chr3:100395950-100396050 |
| chr3 | 100419650 | 100419750 | 1065-Lng-B-T | 64  | chr3:100419650-100419750 |
| chr3 | 100427950 | 100428050 | 1152-Lng-A-T | 94  | chr3:100427950-100428050 |
| chr3 | 100428550 | 100428650 | 1188-Lng-A-T | 232 | chr3:100428550-100428650 |
| chr3 | 100433050 | 100433150 | 1090-Lng-A-T | 61  | chr3:100433050-100433150 |
| chr3 | 100764350 | 100764450 | 1223-Lng-C-T | 72  | chr3:100764350-100764450 |
| chr3 | 100815450 | 100815550 | 1152-Lng-A-T | 797 | chr3:100815450-100815550 |
| chr3 | 100834350 | 100834450 | 1004-Lng-A-T | 469 | chr3:100834350-100834450 |
| chr3 | 100839450 | 100839550 | 1223-Lng-C-T | 43  | chr3:100839450-100839550 |
| chr3 | 100843150 | 100843250 | 1188-Lng-A-T | 47  | chr3:100843150-100843250 |
| chr3 | 100859950 | 100860050 | 1151-Lng-A-T | 497 | chr3:100859950-100860050 |
| chr3 | 100979150 | 100979250 | 1072-Lng-A-T | 147 | chr3:100979150-100979250 |
| chr3 | 101093750 | 101093850 | 1072-Lng-A-T | 92  | chr3:101093750-101093850 |
| chr3 | 101223950 | 101224050 | 1274-Lng-A-T | 54  | chr3:101223950-101224050 |
| chr3 | 101391350 | 101391450 | 1100-Lng-A-T | 54  | chr3:101391350-101391450 |
| chr3 | 101468750 | 101468850 | 1100-Lng-A-T | 143 | chr3:101468750-101468850 |
| chr3 | 101514550 | 101514650 | 1004-Lng-A-T | 59  | chr3:101514550-101514650 |
| chr3 | 101579350 | 101579450 | 1065-Lng-A-T | 68  | chr3:101579350-101579450 |
| chr3 | 101637250 | 101637350 | 1167-Lng-A-T | 51  | chr3:101637250-101637350 |
| chr3 | 101912550 | 101912650 | 901-Lng-D-T  | 614 | chr3:101912550-101912650 |
| chr3 | 102102750 | 102102850 | 1065-Lng-A-T | 91  | chr3:102102750-102102850 |
| chr3 | 102774550 | 102774650 | 1151-Lng-A-T | 90  | chr3:102774550-102774650 |
| chr3 | 102843650 | 102843750 | 901-Lng-B-T  | 273 | chr3:102843650-102843750 |
| chr3 | 103036450 | 103036550 | 901-Lng-B-T  | 184 | chr3:103036450-103036550 |
| chr3 | 103088550 | 103088650 | 1223-Lng-B-T | 38  | chr3:103088550-103088650 |
| chr3 | 103105650 | 103105750 | 1004-Lng-A-T | 351 | chr3:103105650-103105750 |
| chr3 | 103136750 | 103136850 | 901-Lng-B-T  | 122 | chr3:103136750-103136850 |
| chr3 | 103143550 | 103143650 | 1065-Lng-A-T | 41  | chr3:103143550-103143650 |
| chr3 | 103279550 | 103279650 | 1152-Lng-A-T | 37  | chr3:103279550-103279650 |
| chr3 | 103570050 | 103570150 | 1152-Lng-A-T | 171 | chr3:103570050-103570150 |

**Table S2: SB Insertion regions**

|      |           |           |              |     |                          |
|------|-----------|-----------|--------------|-----|--------------------------|
| chr3 | 103582350 | 103582450 | 1152-Lng-A-T | 97  | chr3:103582350-103582450 |
| chr3 | 103617750 | 103617850 | 1274-Lng-A-T | 69  | chr3:103617750-103617850 |
| chr3 | 103740450 | 103740550 | 1090-Lng-A-T | 66  | chr3:103740450-103740550 |
| chr3 | 103752950 | 103753050 | 1167-Lng-A-T | 132 | chr3:103752950-103753050 |
| chr3 | 103756550 | 103756650 | 1090-Lng-A-T | 85  | chr3:103756550-103756650 |
| chr3 | 103764750 | 103764850 | 901-Lng-A-T  | 166 | chr3:103764750-103764850 |
| chr3 | 103813350 | 103813450 | 1090-Lng-A-T | 79  | chr3:103813350-103813450 |
| chr3 | 103837150 | 103837250 | 1151-Lng-A-T | 330 | chr3:103837150-103837250 |
| chr3 | 103857850 | 103857950 | 1152-Lng-A-T | 51  | chr3:103857850-103857950 |
| chr3 | 103880150 | 103880250 | 1152-Lng-A-T | 269 | chr3:103880150-103880250 |
| chr3 | 103882550 | 103882650 | 901-Lng-A-T  | 50  | chr3:103882550-103882650 |
| chr3 | 103913050 | 103913150 | 1223-Lng-A-T | 86  | chr3:103913050-103913150 |
| chr3 | 103927450 | 103927550 | 901-Lng-A-T  | 161 | chr3:103927450-103927550 |
| chr3 | 103936350 | 103936450 | 1223-Lng-B-T | 37  | chr3:103936350-103936450 |
| chr3 | 103947950 | 103948050 | 1072-Lng-A-T | 164 | chr3:103947950-103948050 |
| chr3 | 103949250 | 103949350 | 1065-Lng-A-T | 91  | chr3:103949250-103949350 |
| chr3 | 103952350 | 103952450 | 1152-Lng-A-T | 41  | chr3:103952350-103952450 |
| chr3 | 103952850 | 103952950 | 846-Lng-A-T  | 364 | chr3:103952850-103952950 |
| chr3 | 104038050 | 104038150 | 1065-Lng-C-T | 63  | chr3:104038050-104038150 |
| chr3 | 104299750 | 104299850 | 846-Lng-A-T  | 43  | chr3:104299750-104299850 |
| chr3 | 104367850 | 104367950 | 1065-Lng-B-T | 40  | chr3:104367850-104367950 |
| chr3 | 104601350 | 104601450 | 846-Lng-A-T  | 52  | chr3:104601350-104601450 |
| chr3 | 104657850 | 104657950 | 901-Lng-C-T  | 143 | chr3:104657850-104657950 |
| chr3 | 104715650 | 104715750 | 1100-Lng-A-T | 85  | chr3:104715650-104715750 |
| chr3 | 104718650 | 104718750 | 1167-Lng-A-T | 74  | chr3:104718650-104718750 |
| chr3 | 104738450 | 104738550 | 1274-Lng-A-T | 64  | chr3:104738450-104738550 |
| chr3 | 104748550 | 104748650 | 901-Lng-B-T  | 71  | chr3:104748550-104748650 |
| chr3 | 105127550 | 105127650 | 1167-Lng-A-T | 97  | chr3:105127550-105127650 |
| chr3 | 105172550 | 105172650 | 1152-Lng-A-T | 63  | chr3:105172550-105172650 |
| chr3 | 105248050 | 105248150 | 1072-Lng-A-T | 80  | chr3:105248050-105248150 |
| chr3 | 105337450 | 105337550 | 1065-Lng-A-T | 81  | chr3:105337450-105337550 |
| chr3 | 105485350 | 105485450 | 1100-Lng-A-T | 96  | chr3:105485350-105485450 |
| chr3 | 105586150 | 105586250 | 1004-Lng-A-T | 51  | chr3:105586150-105586250 |
| chr3 | 105589150 | 105589250 | 1223-Lng-D-T | 196 | chr3:105589150-105589250 |
| chr3 | 105733750 | 105733850 | 1223-Lng-D-T | 393 | chr3:105733750-105733850 |
| chr3 | 105744950 | 105745050 | 1223-Lng-D-T | 55  | chr3:105744950-105745050 |
| chr3 | 105745850 | 105745950 | 1223-Lng-A-T | 161 | chr3:105745850-105745950 |
| chr3 | 105837450 | 105837550 | 1065-Lng-A-T | 59  | chr3:105837450-105837550 |
| chr3 | 106267250 | 106267350 | 1274-Lng-A-T | 150 | chr3:106267250-106267350 |
| chr3 | 106308450 | 106308550 | 1152-Lng-A-T | 133 | chr3:106308450-106308550 |
| chr3 | 106355250 | 106355350 | 1100-Lng-A-T | 123 | chr3:106355250-106355350 |
| chr3 | 106566150 | 106566250 | 1065-Lng-C-T | 90  | chr3:106566150-106566250 |
| chr3 | 106617450 | 106617550 | 1065-Lng-C-T | 113 | chr3:106617450-106617550 |
| chr3 | 107111550 | 107111650 | 1065-Lng-C-T | 63  | chr3:107111550-107111650 |
| chr3 | 107168350 | 107168450 | 1065-Lng-A-T | 60  | chr3:107168350-107168450 |
| chr3 | 107419650 | 107419750 | 901-Lng-B-T  | 354 | chr3:107419650-107419750 |

**Table S2: SB Insertion regions**

|      |           |           |              |     |                          |
|------|-----------|-----------|--------------|-----|--------------------------|
| chr3 | 107427050 | 107427150 | 1072-Lng-A-T | 104 | chr3:107427050-107427150 |
| chr3 | 107472750 | 107472850 | 1100-Lng-A-T | 231 | chr3:107472750-107472850 |
| chr3 | 107774650 | 107774750 | 1274-Lng-A-T | 133 | chr3:107774650-107774750 |
| chr3 | 107927550 | 107927650 | 1072-Lng-A-T | 202 | chr3:107927550-107927650 |
| chr3 | 107936550 | 107936650 | 1004-Lng-A-T | 55  | chr3:107936550-107936650 |
| chr3 | 107975150 | 107975250 | 1151-Lng-A-T | 56  | chr3:107975150-107975250 |
| chr3 | 108005450 | 108005550 | 1065-Lng-B-T | 76  | chr3:108005450-108005550 |
| chr3 | 108138950 | 108139050 | 1100-Lng-A-T | 280 | chr3:108138950-108139050 |
| chr3 | 108157550 | 108157650 | 1274-Lng-A-T | 124 | chr3:108157550-108157650 |
| chr3 | 108186050 | 108186150 | 1100-Lng-A-T | 52  | chr3:108186050-108186150 |
| chr3 | 108254050 | 108254150 | 1065-Lng-A-T | 67  | chr3:108254050-108254150 |
| chr3 | 108289150 | 108289250 | 1167-Lng-A-T | 111 | chr3:108289150-108289250 |
| chr3 | 108305450 | 108305550 | 1100-Lng-A-T | 102 | chr3:108305450-108305550 |
| chr3 | 108396550 | 108396650 | 1090-Lng-A-T | 99  | chr3:108396550-108396650 |
| chr3 | 108609250 | 108609350 | 901-Lng-D-T  | 355 | chr3:108609250-108609350 |
| chr3 | 108693150 | 108693250 | 1223-Lng-A-T | 163 | chr3:108693150-108693250 |
| chr3 | 108884750 | 108884850 | 1223-Lng-D-T | 42  | chr3:108884750-108884850 |
| chr3 | 109436750 | 109436850 | 1167-Lng-A-T | 54  | chr3:109436750-109436850 |
| chr3 | 109637650 | 109637750 | 1223-Lng-A-T | 63  | chr3:109637650-109637750 |
| chr3 | 109721250 | 109721350 | 1223-Lng-B-T | 48  | chr3:109721250-109721350 |
| chr3 | 109797950 | 109798050 | 901-Lng-A-T  | 73  | chr3:109797950-109798050 |
| chr3 | 109986150 | 109986250 | 1065-Lng-C-T | 114 | chr3:109986150-109986250 |
| chr3 | 110050850 | 110050950 | 1167-Lng-A-T | 662 | chr3:110050850-110050950 |
| chr3 | 110280350 | 110280450 | 1152-Lng-A-T | 35  | chr3:110280350-110280450 |
| chr3 | 110420450 | 110420550 | 1065-Lng-B-T | 67  | chr3:110420450-110420550 |
| chr3 | 110470250 | 110470350 | 1223-Lng-A-T | 218 | chr3:110470250-110470350 |
| chr3 | 110474950 | 110475050 | 1065-Lng-B-T | 45  | chr3:110474950-110475050 |
| chr3 | 110554950 | 110555050 | 1065-Lng-B-T | 59  | chr3:110554950-110555050 |
| chr3 | 110870650 | 110870750 | 1223-Lng-A-T | 201 | chr3:110870650-110870750 |
| chr3 | 110927950 | 110928050 | 1065-Lng-A-T | 35  | chr3:110927950-110928050 |
| chr3 | 110955750 | 110955850 | 1090-Lng-A-T | 49  | chr3:110955750-110955850 |
| chr3 | 111013250 | 111013350 | 901-Lng-C-T  | 68  | chr3:111013250-111013350 |
| chr3 | 111075350 | 111075450 | 901-Lng-C-T  | 45  | chr3:111075350-111075450 |
| chr3 | 111175250 | 111175350 | 1065-Lng-B-T | 65  | chr3:111175250-111175350 |
| chr3 | 111314650 | 111314750 | 1274-Lng-A-T | 56  | chr3:111314650-111314750 |
| chr3 | 111629350 | 111629450 | 1152-Lng-A-T | 142 | chr3:111629350-111629450 |
| chr3 | 111984150 | 111984250 | 1274-Lng-A-T | 79  | chr3:111984150-111984250 |
| chr3 | 112022150 | 112022250 | 1152-Lng-A-T | 117 | chr3:112022150-112022250 |
| chr3 | 112401950 | 112402050 | 1274-Lng-A-T | 166 | chr3:112401950-112402050 |
| chr3 | 112447250 | 112447350 | 901-Lng-B-T  | 230 | chr3:112447250-112447350 |
| chr3 | 112489350 | 112489450 | 1090-Lng-A-T | 74  | chr3:112489350-112489450 |
| chr3 | 112660750 | 112660850 | 901-Lng-B-T  | 52  | chr3:112660750-112660850 |
| chr3 | 112705150 | 112705250 | 1223-Lng-B-T | 45  | chr3:112705150-112705250 |
| chr3 | 112773150 | 112773250 | 901-Lng-D-T  | 225 | chr3:112773150-112773250 |
| chr3 | 112796250 | 112796350 | 1072-Lng-A-T | 60  | chr3:112796250-112796350 |
| chr3 | 112844450 | 112844550 | 846-Lng-A-T  | 98  | chr3:112844450-112844550 |

**Table S2: SB Insertion regions**

|      |           |           |              |      |                          |
|------|-----------|-----------|--------------|------|--------------------------|
| chr3 | 112877850 | 112877950 | 1152-Lng-A-T | 47   | chr3:112877850-112877950 |
| chr3 | 113338050 | 113338150 | 1072-Lng-A-T | 122  | chr3:113338050-113338150 |
| chr3 | 113472550 | 113472650 | 1065-Lng-C-T | 100  | chr3:113472550-113472650 |
| chr3 | 113525350 | 113525450 | 1065-Lng-A-T | 72   | chr3:113525350-113525450 |
| chr3 | 113558250 | 113558350 | 901-Lng-C-T  | 51   | chr3:113558250-113558350 |
| chr3 | 113666050 | 113666150 | 1152-Lng-A-T | 128  | chr3:113666050-113666150 |
| chr3 | 113826250 | 113826350 | 1072-Lng-A-T | 160  | chr3:113826250-113826350 |
| chr3 | 114128550 | 114128650 | 1223-Lng-D-T | 41   | chr3:114128550-114128650 |
| chr3 | 114194950 | 114195050 | 1188-Lng-A-T | 40   | chr3:114194950-114195050 |
| chr3 | 114303550 | 114303650 | 846-Lng-A-T  | 45   | chr3:114303550-114303650 |
| chr3 | 114400450 | 114400550 | 1151-Lng-A-T | 368  | chr3:114400450-114400550 |
| chr3 | 114808650 | 114808750 | 846-Lng-A-T  | 61   | chr3:114808650-114808750 |
| chr3 | 115164750 | 115164850 | 901-Lng-C-T  | 59   | chr3:115164750-115164850 |
| chr3 | 115263350 | 115263450 | 1100-Lng-A-T | 122  | chr3:115263350-115263450 |
| chr3 | 115630650 | 115630750 | 1090-Lng-B-T | 879  | chr3:115630650-115630750 |
| chr3 | 115649950 | 115650050 | 1223-Lng-B-T | 249  | chr3:115649950-115650050 |
| chr3 | 115675850 | 115675950 | 1065-Lng-A-T | 86   | chr3:115675850-115675950 |
| chr3 | 115688750 | 115688850 | 1223-Lng-D-T | 47   | chr3:115688750-115688850 |
| chr3 | 115694350 | 115694450 | 1065-Lng-A-T | 84   | chr3:115694350-115694450 |
| chr3 | 115712750 | 115712850 | 1090-Lng-A-T | 633  | chr3:115712750-115712850 |
| chr3 | 115793550 | 115793650 | 1072-Lng-A-T | 110  | chr3:115793550-115793650 |
| chr3 | 115897950 | 115898050 | 901-Lng-B-T  | 43   | chr3:115897950-115898050 |
| chr3 | 115938850 | 115938950 | 901-Lng-B-T  | 156  | chr3:115938850-115938950 |
| chr3 | 115951050 | 115951150 | 1274-Lng-A-T | 107  | chr3:115951050-115951150 |
| chr3 | 116011550 | 116011650 | 1065-Lng-B-T | 94   | chr3:116011550-116011650 |
| chr3 | 116069250 | 116069350 | 1004-Lng-A-T | 50   | chr3:116069250-116069350 |
| chr3 | 116085150 | 116085250 | 846-Lng-A-T  | 170  | chr3:116085150-116085250 |
| chr3 | 116097150 | 116097250 | 1100-Lng-A-T | 61   | chr3:116097150-116097250 |
| chr3 | 116113450 | 116113550 | 1004-Lng-A-T | 197  | chr3:116113450-116113550 |
| chr3 | 116184350 | 116184450 | 901-Lng-B-T  | 110  | chr3:116184350-116184450 |
| chr3 | 116535750 | 116535850 | 1223-Lng-B-T | 174  | chr3:116535750-116535850 |
| chr3 | 116650950 | 116651050 | 846-Lng-A-T  | 2148 | chr3:116650950-116651050 |
| chr3 | 116743550 | 116743650 | 1065-Lng-C-T | 64   | chr3:116743550-116743650 |
| chr3 | 117384050 | 117384150 | 1065-Lng-A-T | 60   | chr3:117384050-117384150 |
| chr3 | 117405050 | 117405150 | 901-Lng-B-T  | 187  | chr3:117405050-117405150 |
| chr3 | 117427150 | 117427250 | 1223-Lng-D-T | 75   | chr3:117427150-117427250 |
| chr3 | 117451550 | 117451650 | 901-Lng-B-T  | 150  | chr3:117451550-117451650 |
| chr3 | 117500750 | 117500850 | 1274-Lng-A-T | 121  | chr3:117500750-117500850 |
| chr3 | 117504850 | 117504950 | 1274-Lng-A-T | 60   | chr3:117504850-117504950 |
| chr3 | 117557050 | 117557150 | 846-Lng-A-T  | 1333 | chr3:117557050-117557150 |
| chr3 | 117681850 | 117681950 | 1152-Lng-A-T | 88   | chr3:117681850-117681950 |
| chr3 | 118036750 | 118036850 | 1274-Lng-A-T | 61   | chr3:118036750-118036850 |
| chr3 | 118121750 | 118121850 | 1072-Lng-A-T | 70   | chr3:118121750-118121850 |
| chr3 | 118579550 | 118579650 | 1065-Lng-A-T | 73   | chr3:118579550-118579650 |
| chr3 | 118931650 | 118931750 | 1090-Lng-A-T | 57   | chr3:118931650-118931750 |
| chr3 | 119041650 | 119041750 | 1065-Lng-A-T | 58   | chr3:119041650-119041750 |

**Table S2: SB Insertion regions**

|      |           |           |              |      |                          |
|------|-----------|-----------|--------------|------|--------------------------|
| chr3 | 119051150 | 119051250 | 1065-Lng-A-T | 77   | chr3:119051150-119051250 |
| chr3 | 119116250 | 119116350 | 1152-Lng-A-T | 214  | chr3:119116250-119116350 |
| chr3 | 119150250 | 119150350 | 1188-Lng-A-T | 81   | chr3:119150250-119150350 |
| chr3 | 119317750 | 119317850 | 1065-Lng-A-T | 40   | chr3:119317750-119317850 |
| chr3 | 119323550 | 119323650 | 1065-Lng-A-T | 115  | chr3:119323550-119323650 |
| chr3 | 119427450 | 119427550 | 1004-Lng-A-T | 74   | chr3:119427450-119427550 |
| chr3 | 119441850 | 119441950 | 1151-Lng-A-T | 487  | chr3:119441850-119441950 |
| chr3 | 119476150 | 119476250 | 1151-Lng-A-T | 165  | chr3:119476150-119476250 |
| chr3 | 119680150 | 119680250 | 901-Lng-C-T  | 190  | chr3:119680150-119680250 |
| chr3 | 119841750 | 119841850 | 1065-Lng-B-T | 96   | chr3:119841750-119841850 |
| chr3 | 119880450 | 119880550 | 1223-Lng-A-T | 81   | chr3:119880450-119880550 |
| chr3 | 119953450 | 119953550 | 1274-Lng-A-T | 132  | chr3:119953450-119953550 |
| chr3 | 120479550 | 120479650 | 1065-Lng-A-T | 43   | chr3:120479550-120479650 |
| chr3 | 120948950 | 120949050 | 1065-Lng-B-T | 44   | chr3:120948950-120949050 |
| chr3 | 121033050 | 121033150 | 1065-Lng-B-T | 54   | chr3:121033050-121033150 |
| chr3 | 121228150 | 121228250 | 846-Lng-A-T  | 105  | chr3:121228150-121228250 |
| chr3 | 121243050 | 121243150 | 1274-Lng-A-T | 73   | chr3:121243050-121243150 |
| chr3 | 121264750 | 121264850 | 1072-Lng-A-T | 94   | chr3:121264750-121264850 |
| chr3 | 121280850 | 121280950 | 1274-Lng-A-T | 63   | chr3:121280850-121280950 |
| chr3 | 121338150 | 121338250 | 1223-Lng-D-T | 43   | chr3:121338150-121338250 |
| chr3 | 121364650 | 121364750 | 1065-Lng-B-T | 8881 | chr3:121364650-121364750 |
| chr3 | 121470050 | 121470150 | 901-Lng-A-T  | 87   | chr3:121470050-121470150 |
| chr3 | 121486350 | 121486450 | 1167-Lng-A-T | 66   | chr3:121486350-121486450 |
| chr3 | 121489450 | 121489550 | 1100-Lng-A-T | 57   | chr3:121489450-121489550 |
| chr3 | 121503650 | 121503750 | 1274-Lng-A-T | 49   | chr3:121503650-121503750 |
| chr3 | 121534750 | 121534850 | 1223-Lng-B-T | 36   | chr3:121534750-121534850 |
| chr3 | 121834150 | 121834250 | 901-Lng-B-T  | 45   | chr3:121834150-121834250 |
| chr3 | 122008450 | 122008550 | 1151-Lng-A-T | 59   | chr3:122008450-122008550 |
| chr3 | 122090350 | 122090450 | 1274-Lng-A-T | 114  | chr3:122090350-122090450 |
| chr3 | 122116250 | 122116350 | 1065-Lng-A-T | 81   | chr3:122116250-122116350 |
| chr3 | 122162550 | 122162650 | 1167-Lng-A-T | 118  | chr3:122162550-122162650 |
| chr3 | 122168150 | 122168250 | 846-Lng-A-T  | 69   | chr3:122168150-122168250 |
| chr3 | 122193350 | 122193450 | 1004-Lng-A-T | 86   | chr3:122193350-122193450 |
| chr3 | 122238450 | 122238550 | 1090-Lng-B-T | 219  | chr3:122238450-122238550 |
| chr3 | 122287850 | 122287950 | 1100-Lng-A-T | 75   | chr3:122287850-122287950 |
| chr3 | 122294050 | 122294150 | 901-Lng-B-T  | 38   | chr3:122294050-122294150 |
| chr3 | 122294050 | 122294150 | 1167-Lng-A-T | 59   | chr3:122294050-122294150 |
| chr3 | 122300150 | 122300250 | 1004-Lng-A-T | 75   | chr3:122300150-122300250 |
| chr3 | 122320550 | 122320650 | 1223-Lng-D-T | 114  | chr3:122320550-122320650 |
| chr3 | 122532250 | 122532350 | 1065-Lng-B-T | 52   | chr3:122532250-122532350 |
| chr3 | 122661850 | 122661950 | 901-Lng-B-T  | 140  | chr3:122661850-122661950 |
| chr3 | 122669650 | 122669750 | 1072-Lng-A-T | 177  | chr3:122669650-122669750 |
| chr3 | 122918650 | 122918750 | 901-Lng-C-T  | 91   | chr3:122918650-122918750 |
| chr3 | 123004850 | 123004950 | 1065-Lng-A-T | 71   | chr3:123004850-123004950 |
| chr3 | 123153650 | 123153750 | 1004-Lng-A-T | 89   | chr3:123153650-123153750 |
| chr3 | 123777150 | 123777250 | 1090-Lng-A-T | 47   | chr3:123777150-123777250 |

**Table S2: SB Insertion regions**

|      |           |           |              |      |                          |
|------|-----------|-----------|--------------|------|--------------------------|
| chr3 | 124168450 | 124168550 | 901-Lng-D-T  | 151  | chr3:124168450-124168550 |
| chr3 | 124267150 | 124267250 | 901-Lng-B-T  | 59   | chr3:124267150-124267250 |
| chr3 | 124664850 | 124664950 | 1072-Lng-A-T | 60   | chr3:124664850-124664950 |
| chr3 | 124694650 | 124694750 | 1072-Lng-A-T | 155  | chr3:124694650-124694750 |
| chr3 | 124794550 | 124794650 | 1223-Lng-A-T | 1811 | chr3:124794550-124794650 |
| chr3 | 125252850 | 125252950 | 1151-Lng-A-T | 298  | chr3:125252850-125252950 |
| chr3 | 125332550 | 125332650 | 846-Lng-A-T  | 107  | chr3:125332550-125332650 |
| chr3 | 125333650 | 125333750 | 1072-Lng-A-T | 108  | chr3:125333650-125333750 |
| chr3 | 125386350 | 125386450 | 901-Lng-C-T  | 55   | chr3:125386350-125386450 |
| chr3 | 125580950 | 125581050 | 901-Lng-A-T  | 122  | chr3:125580950-125581050 |
| chr3 | 125741050 | 125741150 | 1065-Lng-B-T | 63   | chr3:125741050-125741150 |
| chr3 | 125855750 | 125855850 | 1065-Lng-A-T | 62   | chr3:125855750-125855850 |
| chr3 | 126045050 | 126045150 | 1065-Lng-B-T | 60   | chr3:126045050-126045150 |
| chr3 | 126050750 | 126050850 | 1100-Lng-A-T | 106  | chr3:126050750-126050850 |
| chr3 | 126070950 | 126071050 | 1065-Lng-A-T | 81   | chr3:126070950-126071050 |
| chr3 | 126405050 | 126405150 | 1223-Lng-B-T | 213  | chr3:126405050-126405150 |
| chr3 | 126416050 | 126416150 | 846-Lng-A-T  | 74   | chr3:126416050-126416150 |
| chr3 | 126532350 | 126532450 | 1274-Lng-A-T | 155  | chr3:126532350-126532450 |
| chr3 | 126572950 | 126573050 | 846-Lng-A-T  | 125  | chr3:126572950-126573050 |
| chr3 | 126584550 | 126584650 | 1072-Lng-A-T | 54   | chr3:126584550-126584650 |
| chr3 | 126811950 | 126812050 | 1223-Lng-A-T | 1628 | chr3:126811950-126812050 |
| chr3 | 126902550 | 126902650 | 1167-Lng-A-T | 70   | chr3:126902550-126902650 |
| chr3 | 127232450 | 127232550 | 1065-Lng-B-T | 39   | chr3:127232450-127232550 |
| chr3 | 127299650 | 127299750 | 1223-Lng-C-T | 44   | chr3:127299650-127299750 |
| chr3 | 127547650 | 127547750 | 1090-Lng-A-T | 47   | chr3:127547650-127547750 |
| chr3 | 127550650 | 127550750 | 1223-Lng-A-T | 225  | chr3:127550650-127550750 |
| chr3 | 127596750 | 127596850 | 1100-Lng-A-T | 99   | chr3:127596750-127596850 |
| chr3 | 127675450 | 127675550 | 901-Lng-C-T  | 30   | chr3:127675450-127675550 |
| chr3 | 127881050 | 127881150 | 1274-Lng-A-T | 82   | chr3:127881050-127881150 |
| chr3 | 128004850 | 128004950 | 1065-Lng-C-T | 105  | chr3:128004850-128004950 |
| chr3 | 128251650 | 128251750 | 901-Lng-A-T  | 67   | chr3:128251650-128251750 |
| chr3 | 128512950 | 128513050 | 1274-Lng-A-T | 88   | chr3:128512950-128513050 |
| chr3 | 128548350 | 128548450 | 1004-Lng-A-T | 69   | chr3:128548350-128548450 |
| chr3 | 128600350 | 128600450 | 1223-Lng-A-T | 79   | chr3:128600350-128600450 |
| chr3 | 128643450 | 128643550 | 1188-Lng-A-T | 40   | chr3:128643450-128643550 |
| chr3 | 128758350 | 128758450 | 1274-Lng-A-T | 230  | chr3:128758350-128758450 |
| chr3 | 128863650 | 128863750 | 1151-Lng-A-T | 79   | chr3:128863650-128863750 |
| chr3 | 128977950 | 128978050 | 1152-Lng-A-T | 63   | chr3:128977950-128978050 |
| chr3 | 129018250 | 129018350 | 1072-Lng-A-T | 49   | chr3:129018250-129018350 |
| chr3 | 129038050 | 129038150 | 901-Lng-C-T  | 41   | chr3:129038050-129038150 |
| chr3 | 129161750 | 129161850 | 901-Lng-A-T  | 70   | chr3:129161750-129161850 |
| chr3 | 129692150 | 129692250 | 1065-Lng-A-T | 43   | chr3:129692150-129692250 |
| chr3 | 129734950 | 129735050 | 1004-Lng-A-T | 63   | chr3:129734950-129735050 |
| chr3 | 129758950 | 129759050 | 1090-Lng-A-T | 78   | chr3:129758950-129759050 |
| chr3 | 130089250 | 130089350 | 1072-Lng-A-T | 50   | chr3:130089250-130089350 |
| chr3 | 130276350 | 130276450 | 1072-Lng-A-T | 56   | chr3:130276350-130276450 |

**Table S2: SB Insertion regions**

|      |           |           |              |     |                          |
|------|-----------|-----------|--------------|-----|--------------------------|
| chr3 | 130339050 | 130339150 | 846-Lng-A-T  | 218 | chr3:130339050-130339150 |
| chr3 | 131154850 | 131154950 | 1065-Lng-B-T | 40  | chr3:131154850-131154950 |
| chr3 | 131234150 | 131234250 | 1072-Lng-A-T | 129 | chr3:131234150-131234250 |
| chr3 | 131280250 | 131280350 | 1072-Lng-A-T | 79  | chr3:131280250-131280350 |
| chr3 | 131407350 | 131407450 | 901-Lng-A-T  | 426 | chr3:131407350-131407450 |
| chr3 | 131443950 | 131444050 | 901-Lng-D-T  | 205 | chr3:131443950-131444050 |
| chr3 | 131522150 | 131522250 | 901-Lng-B-T  | 70  | chr3:131522150-131522250 |
| chr3 | 131652150 | 131652250 | 1004-Lng-A-T | 117 | chr3:131652150-131652250 |
| chr3 | 131666550 | 131666650 | 1152-Lng-A-T | 94  | chr3:131666550-131666650 |
| chr3 | 132360250 | 132360350 | 1152-Lng-A-T | 297 | chr3:132360250-132360350 |
| chr3 | 132431450 | 132431550 | 1072-Lng-A-T | 86  | chr3:132431450-132431550 |
| chr3 | 132438250 | 132438350 | 901-Lng-A-T  | 332 | chr3:132438250-132438350 |
| chr3 | 132610750 | 132610850 | 1274-Lng-A-T | 54  | chr3:132610750-132610850 |
| chr3 | 132722850 | 132722950 | 1151-Lng-A-T | 57  | chr3:132722850-132722950 |
| chr3 | 132770650 | 132770750 | 1167-Lng-A-T | 205 | chr3:132770650-132770750 |
| chr3 | 132776850 | 132776950 | 1167-Lng-A-T | 49  | chr3:132776850-132776950 |
| chr3 | 132797750 | 132797850 | 1188-Lng-A-T | 39  | chr3:132797750-132797850 |
| chr3 | 132799250 | 132799350 | 1090-Lng-A-T | 45  | chr3:132799250-132799350 |
| chr3 | 132800050 | 132800150 | 1274-Lng-A-T | 106 | chr3:132800050-132800150 |
| chr3 | 132832150 | 132832250 | 901-Lng-A-T  | 58  | chr3:132832150-132832250 |
| chr3 | 133035750 | 133035850 | 1223-Lng-C-T | 43  | chr3:133035750-133035850 |
| chr3 | 133142750 | 133142850 | 1223-Lng-B-T | 217 | chr3:133142750-133142850 |
| chr3 | 133175450 | 133175550 | 1223-Lng-B-T | 48  | chr3:133175450-133175550 |
| chr3 | 133193550 | 133193650 | 1004-Lng-A-T | 87  | chr3:133193550-133193650 |
| chr3 | 133224050 | 133224150 | 1090-Lng-A-T | 50  | chr3:133224050-133224150 |
| chr3 | 133298250 | 133298350 | 1065-Lng-A-T | 47  | chr3:133298250-133298350 |
| chr3 | 133856850 | 133856950 | 1065-Lng-B-T | 312 | chr3:133856850-133856950 |
| chr3 | 133869450 | 133869550 | 846-Lng-A-T  | 295 | chr3:133869450-133869550 |
| chr3 | 134186650 | 134186750 | 901-Lng-C-T  | 51  | chr3:134186650-134186750 |
| chr3 | 134420750 | 134420850 | 901-Lng-C-T  | 48  | chr3:134420750-134420850 |
| chr3 | 134470250 | 134470350 | 1223-Lng-B-T | 227 | chr3:134470250-134470350 |
| chr3 | 134504250 | 134504350 | 1004-Lng-A-T | 54  | chr3:134504250-134504350 |
| chr3 | 134625850 | 134625950 | 1223-Lng-B-T | 60  | chr3:134625850-134625950 |
| chr3 | 134688650 | 134688750 | 1274-Lng-A-T | 57  | chr3:134688650-134688750 |
| chr3 | 134771750 | 134771850 | 1223-Lng-A-T | 135 | chr3:134771750-134771850 |
| chr3 | 134952750 | 134952850 | 1188-Lng-A-T | 51  | chr3:134952750-134952850 |
| chr3 | 135107850 | 135107950 | 1274-Lng-A-T | 50  | chr3:135107850-135107950 |
| chr3 | 135119750 | 135119850 | 1065-Lng-B-T | 129 | chr3:135119750-135119850 |
| chr3 | 135306450 | 135306550 | 901-Lng-C-T  | 55  | chr3:135306450-135306550 |
| chr3 | 135331550 | 135331650 | 1151-Lng-A-T | 130 | chr3:135331550-135331650 |
| chr3 | 135430350 | 135430450 | 1223-Lng-C-T | 56  | chr3:135430350-135430450 |
| chr3 | 135486550 | 135486650 | 1100-Lng-A-T | 70  | chr3:135486550-135486650 |
| chr3 | 135510250 | 135510350 | 1152-Lng-A-T | 85  | chr3:135510250-135510350 |
| chr3 | 135896450 | 135896550 | 901-Lng-C-T  | 44  | chr3:135896450-135896550 |
| chr3 | 136337950 | 136338050 | 1223-Lng-D-T | 84  | chr3:136337950-136338050 |
| chr3 | 136358750 | 136358850 | 1004-Lng-A-T | 75  | chr3:136358750-136358850 |



**Table S2: SB Insertion regions**

|      |           |           |              |      |                          |
|------|-----------|-----------|--------------|------|--------------------------|
| chr3 | 136368450 | 136368550 | 901-Lng-A-T  | 379  | chr3:136368450-136368550 |
| chr3 | 136381150 | 136381250 | 901-Lng-A-T  | 116  | chr3:136381150-136381250 |
| chr3 | 136385750 | 136385850 | 1274-Lng-A-T | 141  | chr3:136385750-136385850 |
| chr3 | 136396150 | 136396250 | 1100-Lng-A-T | 111  | chr3:136396150-136396250 |
| chr3 | 136406150 | 136406250 | 1090-Lng-B-T | 523  | chr3:136406150-136406250 |
| chr3 | 136420350 | 136420450 | 1072-Lng-A-T | 7202 | chr3:136420350-136420450 |
| chr3 | 136453250 | 136453350 | 901-Lng-B-T  | 139  | chr3:136453250-136453350 |
| chr3 | 136463250 | 136463350 | 1152-Lng-A-T | 108  | chr3:136463250-136463350 |
| chr3 | 136480450 | 136480550 | 1223-Lng-D-T | 84   | chr3:136480450-136480550 |
| chr3 | 136483750 | 136483850 | 1072-Lng-A-T | 103  | chr3:136483750-136483850 |
| chr3 | 136494450 | 136494550 | 1274-Lng-A-T | 55   | chr3:136494450-136494550 |
| chr3 | 136506650 | 136506750 | 1223-Lng-B-T | 282  | chr3:136506650-136506750 |
| chr3 | 136538150 | 136538250 | 1167-Lng-A-T | 50   | chr3:136538150-136538250 |
| chr3 | 136571550 | 136571650 | 1188-Lng-A-T | 77   | chr3:136571550-136571650 |
| chr3 | 136716050 | 136716150 | 901-Lng-C-T  | 55   | chr3:136716050-136716150 |
| chr3 | 137085250 | 137085350 | 1223-Lng-A-T | 84   | chr3:137085250-137085350 |
| chr3 | 137153650 | 137153750 | 1072-Lng-A-T | 73   | chr3:137153650-137153750 |
| chr3 | 137224850 | 137224950 | 901-Lng-B-T  | 155  | chr3:137224850-137224950 |
| chr3 | 137541050 | 137541150 | 1151-Lng-A-T | 329  | chr3:137541050-137541150 |
| chr3 | 137562750 | 137562850 | 1072-Lng-A-T | 112  | chr3:137562750-137562850 |
| chr3 | 137583250 | 137583350 | 1188-Lng-A-T | 113  | chr3:137583250-137583350 |
| chr3 | 137683350 | 137683450 | 1090-Lng-A-T | 57   | chr3:137683350-137683450 |
| chr3 | 137860050 | 137860150 | 1223-Lng-A-T | 68   | chr3:137860050-137860150 |
| chr3 | 138105350 | 138105450 | 901-Lng-B-T  | 306  | chr3:138105350-138105450 |
| chr3 | 138309550 | 138309650 | 1065-Lng-B-T | 175  | chr3:138309550-138309650 |
| chr3 | 138422650 | 138422750 | 901-Lng-B-T  | 155  | chr3:138422650-138422750 |
| chr3 | 138466450 | 138466550 | 901-Lng-A-T  | 92   | chr3:138466450-138466550 |
| chr3 | 138518150 | 138518250 | 1100-Lng-A-T | 556  | chr3:138518150-138518250 |
| chr3 | 138618250 | 138618350 | 901-Lng-A-T  | 63   | chr3:138618250-138618350 |
| chr3 | 139007150 | 139007250 | 1065-Lng-C-T | 68   | chr3:139007150-139007250 |
| chr3 | 139105650 | 139105750 | 846-Lng-A-T  | 48   | chr3:139105650-139105750 |
| chr3 | 139256450 | 139256550 | 846-Lng-A-T  | 87   | chr3:139256450-139256550 |
| chr3 | 139260250 | 139260350 | 1004-Lng-A-T | 152  | chr3:139260250-139260350 |
| chr3 | 139338250 | 139338350 | 1065-Lng-A-T | 53   | chr3:139338250-139338350 |
| chr3 | 139530650 | 139530750 | 1090-Lng-A-T | 88   | chr3:139530650-139530750 |
| chr3 | 139556050 | 139556150 | 1090-Lng-A-T | 88   | chr3:139556050-139556150 |
| chr3 | 139601950 | 139602050 | 1004-Lng-A-T | 55   | chr3:139601950-139602050 |
| chr3 | 139632750 | 139632850 | 901-Lng-B-T  | 143  | chr3:139632750-139632850 |
| chr3 | 139984550 | 139984650 | 901-Lng-A-T  | 80   | chr3:139984550-139984650 |
| chr3 | 140100450 | 140100550 | 1223-Lng-B-T | 40   | chr3:140100450-140100550 |
| chr3 | 140513150 | 140513250 | 1065-Lng-A-T | 68   | chr3:140513150-140513250 |
| chr3 | 140553150 | 140553250 | 1100-Lng-B-T | 50   | chr3:140553150-140553250 |
| chr3 | 140639150 | 140639250 | 1223-Lng-A-T | 307  | chr3:140639150-140639250 |
| chr3 | 140672050 | 140672150 | 1151-Lng-A-T | 116  | chr3:140672050-140672150 |
| chr3 | 140882450 | 140882550 | 1065-Lng-B-T | 83   | chr3:140882450-140882550 |
| chr3 | 140929950 | 140930050 | 901-Lng-B-T  | 143  | chr3:140929950-140930050 |

**Table S2: SB Insertion regions**

|      |           |           |              |      |                          |
|------|-----------|-----------|--------------|------|--------------------------|
| chr3 | 141105150 | 141105250 | 1100-Lng-A-T | 86   | chr3:141105150-141105250 |
| chr3 | 141112850 | 141112950 | 1065-Lng-C-T | 61   | chr3:141112850-141112950 |
| chr3 | 141394650 | 141394750 | 1223-Lng-D-T | 56   | chr3:141394650-141394750 |
| chr3 | 141633550 | 141633650 | 846-Lng-A-T  | 118  | chr3:141633550-141633650 |
| chr3 | 141641250 | 141641350 | 1065-Lng-A-T | 104  | chr3:141641250-141641350 |
| chr3 | 141647150 | 141647250 | 1065-Lng-B-T | 67   | chr3:141647150-141647250 |
| chr3 | 141778450 | 141778550 | 1274-Lng-A-T | 158  | chr3:141778450-141778550 |
| chr3 | 141950450 | 141950550 | 1151-Lng-A-T | 1310 | chr3:141950450-141950550 |
| chr3 | 141971050 | 141971150 | 1274-Lng-A-T | 387  | chr3:141971050-141971150 |
| chr3 | 141992050 | 141992150 | 1188-Lng-A-T | 40   | chr3:141992050-141992150 |
| chr3 | 141997350 | 141997450 | 1100-Lng-B-T | 276  | chr3:141997350-141997450 |
| chr3 | 142020150 | 142020250 | 1223-Lng-D-T | 40   | chr3:142020150-142020250 |
| chr3 | 142182250 | 142182350 | 1151-Lng-A-T | 301  | chr3:142182250-142182350 |
| chr3 | 142429950 | 142430050 | 901-Lng-B-T  | 216  | chr3:142429950-142430050 |
| chr3 | 142500550 | 142500650 | 1274-Lng-A-T | 123  | chr3:142500550-142500650 |
| chr3 | 142512250 | 142512350 | 1065-Lng-C-T | 323  | chr3:142512250-142512350 |
| chr3 | 142517350 | 142517450 | 901-Lng-A-T  | 80   | chr3:142517350-142517450 |
| chr3 | 142686250 | 142686350 | 846-Lng-A-T  | 768  | chr3:142686250-142686350 |
| chr3 | 142715250 | 142715350 | 1151-Lng-A-T | 178  | chr3:142715250-142715350 |
| chr3 | 142916950 | 142917050 | 1151-Lng-A-T | 370  | chr3:142916950-142917050 |
| chr3 | 143058550 | 143058650 | 901-Lng-A-T  | 77   | chr3:143058550-143058650 |
| chr3 | 143142650 | 143142750 | 1223-Lng-B-T | 43   | chr3:143142650-143142750 |
| chr3 | 143859350 | 143859450 | 901-Lng-C-T  | 99   | chr3:143859350-143859450 |
| chr3 | 144103050 | 144103150 | 1152-Lng-A-T | 64   | chr3:144103050-144103150 |
| chr3 | 144113750 | 144113850 | 1223-Lng-B-T | 282  | chr3:144113750-144113850 |
| chr3 | 144156050 | 144156150 | 1167-Lng-A-T | 56   | chr3:144156050-144156150 |
| chr3 | 144222850 | 144222950 | 1223-Lng-D-T | 42   | chr3:144222850-144222950 |
| chr3 | 144352550 | 144352650 | 1090-Lng-B-T | 525  | chr3:144352550-144352650 |
| chr3 | 144375750 | 144375850 | 1223-Lng-D-T | 68   | chr3:144375750-144375850 |
| chr3 | 144379850 | 144379950 | 1167-Lng-A-T | 149  | chr3:144379850-144379950 |
| chr3 | 144487550 | 144487650 | 1188-Lng-A-T | 45   | chr3:144487550-144487650 |
| chr3 | 144696750 | 144696850 | 1223-Lng-D-T | 42   | chr3:144696750-144696850 |
| chr3 | 145053550 | 145053650 | 1065-Lng-A-T | 66   | chr3:145053550-145053650 |
| chr3 | 145286350 | 145286450 | 901-Lng-B-T  | 90   | chr3:145286350-145286450 |
| chr3 | 145379850 | 145379950 | 901-Lng-A-T  | 314  | chr3:145379850-145379950 |
| chr3 | 145382050 | 145382150 | 1090-Lng-B-T | 133  | chr3:145382050-145382150 |
| chr3 | 145836350 | 145836450 | 901-Lng-B-T  | 150  | chr3:145836350-145836450 |
| chr3 | 145940950 | 145941050 | 901-Lng-D-T  | 234  | chr3:145940950-145941050 |
| chr3 | 146101050 | 146101150 | 901-Lng-A-T  | 62   | chr3:146101050-146101150 |
| chr3 | 146167150 | 146167250 | 1274-Lng-A-T | 137  | chr3:146167150-146167250 |
| chr3 | 146177550 | 146177650 | 1100-Lng-A-T | 953  | chr3:146177550-146177650 |
| chr3 | 146177850 | 146177950 | 1223-Lng-A-T | 85   | chr3:146177850-146177950 |
| chr3 | 146212550 | 146212650 | 1223-Lng-B-T | 41   | chr3:146212550-146212650 |
| chr3 | 146338050 | 146338150 | 1090-Lng-A-T | 132  | chr3:146338050-146338150 |
| chr3 | 146346150 | 146346250 | 901-Lng-A-T  | 114  | chr3:146346150-146346250 |
| chr3 | 146416150 | 146416250 | 1167-Lng-A-T | 89   | chr3:146416150-146416250 |

**Table S2: SB Insertion regions**

|      |           |           |              |      |                          |
|------|-----------|-----------|--------------|------|--------------------------|
| chr3 | 146444550 | 146444650 | 1065-Lng-C-T | 75   | chr3:146444550-146444650 |
| chr3 | 146468450 | 146468550 | 1223-Lng-C-T | 69   | chr3:146468450-146468550 |
| chr3 | 146474350 | 146474450 | 1223-Lng-C-T | 45   | chr3:146474350-146474450 |
| chr3 | 146529150 | 146529250 | 1274-Lng-A-T | 67   | chr3:146529150-146529250 |
| chr3 | 146540850 | 146540950 | 1152-Lng-A-T | 88   | chr3:146540850-146540950 |
| chr3 | 146562650 | 146562750 | 1223-Lng-C-T | 52   | chr3:146562650-146562750 |
| chr3 | 146595050 | 146595150 | 1090-Lng-A-T | 81   | chr3:146595050-146595150 |
| chr3 | 146608450 | 146608550 | 1274-Lng-A-T | 70   | chr3:146608450-146608550 |
| chr3 | 146639850 | 146639950 | 1065-Lng-B-T | 79   | chr3:146639850-146639950 |
| chr3 | 146639850 | 146639950 | 901-Lng-C-T  | 202  | chr3:146639850-146639950 |
| chr3 | 146691550 | 146691650 | 901-Lng-A-T  | 157  | chr3:146691550-146691650 |
| chr3 | 146721850 | 146721950 | 1274-Lng-A-T | 69   | chr3:146721850-146721950 |
| chr3 | 146729250 | 146729350 | 901-Lng-B-T  | 87   | chr3:146729250-146729350 |
| chr3 | 146901450 | 146901550 | 1274-Lng-A-T | 64   | chr3:146901450-146901550 |
| chr3 | 147112750 | 147112850 | 901-Lng-A-T  | 93   | chr3:147112750-147112850 |
| chr3 | 147156650 | 147156750 | 1072-Lng-A-T | 62   | chr3:147156650-147156750 |
| chr3 | 147758050 | 147758150 | 1065-Lng-B-T | 60   | chr3:147758050-147758150 |
| chr3 | 147922550 | 147922650 | 1004-Lng-A-T | 92   | chr3:147922550-147922650 |
| chr3 | 148048950 | 148049050 | 901-Lng-A-T  | 86   | chr3:148048950-148049050 |
| chr3 | 148464550 | 148464650 | 1223-Lng-A-T | 65   | chr3:148464550-148464650 |
| chr3 | 148490250 | 148490350 | 1223-Lng-B-T | 38   | chr3:148490250-148490350 |
| chr3 | 148544450 | 148544550 | 1065-Lng-A-T | 866  | chr3:148544450-148544550 |
| chr3 | 148567850 | 148567950 | 1151-Lng-A-T | 197  | chr3:148567850-148567950 |
| chr3 | 148581550 | 148581650 | 1188-Lng-A-T | 145  | chr3:148581550-148581650 |
| chr3 | 148612550 | 148612650 | 1274-Lng-A-T | 86   | chr3:148612550-148612650 |
| chr3 | 148979450 | 148979550 | 1072-Lng-A-T | 85   | chr3:148979450-148979550 |
| chr3 | 148985950 | 148986050 | 901-Lng-B-T  | 73   | chr3:148985950-148986050 |
| chr3 | 149278250 | 149278350 | 901-Lng-A-T  | 77   | chr3:149278250-149278350 |
| chr3 | 149278750 | 149278850 | 1151-Lng-A-T | 299  | chr3:149278750-149278850 |
| chr3 | 149671350 | 149671450 | 1188-Lng-A-T | 44   | chr3:149671350-149671450 |
| chr3 | 149718950 | 149719050 | 1090-Lng-B-T | 1420 | chr3:149718950-149719050 |
| chr3 | 150212350 | 150212450 | 1274-Lng-A-T | 56   | chr3:150212350-150212450 |
| chr3 | 150215350 | 150215450 | 1100-Lng-A-T | 57   | chr3:150215350-150215450 |
| chr3 | 150269450 | 150269550 | 901-Lng-A-T  | 74   | chr3:150269450-150269550 |
| chr3 | 150462550 | 150462650 | 901-Lng-A-T  | 80   | chr3:150462550-150462650 |
| chr3 | 150716350 | 150716450 | 901-Lng-D-T  | 103  | chr3:150716350-150716450 |
| chr3 | 150718250 | 150718350 | 1065-Lng-B-T | 42   | chr3:150718250-150718350 |
| chr3 | 150866850 | 150866950 | 901-Lng-A-T  | 203  | chr3:150866850-150866950 |
| chr3 | 150968050 | 150968150 | 1100-Lng-B-T | 58   | chr3:150968050-150968150 |
| chr3 | 151170450 | 151170550 | 1004-Lng-A-T | 60   | chr3:151170450-151170550 |
| chr3 | 151176250 | 151176350 | 1274-Lng-A-T | 62   | chr3:151176250-151176350 |
| chr3 | 151355150 | 151355250 | 1167-Lng-A-T | 72   | chr3:151355150-151355250 |
| chr3 | 151397950 | 151398050 | 901-Lng-B-T  | 80   | chr3:151397950-151398050 |
| chr3 | 151783050 | 151783150 | 1090-Lng-B-T | 765  | chr3:151783050-151783150 |
| chr3 | 151876150 | 151876250 | 1274-Lng-A-T | 101  | chr3:151876150-151876250 |
| chr3 | 151878850 | 151878950 | 1100-Lng-A-T | 115  | chr3:151878850-151878950 |

**Table S2: SB Insertion regions**

|      |           |           |              |     |                          |
|------|-----------|-----------|--------------|-----|--------------------------|
| chr3 | 151910650 | 151910750 | 1223-Lng-A-T | 96  | chr3:151910650-151910750 |
| chr3 | 151947750 | 151947850 | 1065-Lng-B-T | 54  | chr3:151947750-151947850 |
| chr3 | 152049350 | 152049450 | 901-Lng-B-T  | 90  | chr3:152049350-152049450 |
| chr3 | 152064850 | 152064950 | 1223-Lng-B-T | 36  | chr3:152064850-152064950 |
| chr3 | 152075050 | 152075150 | 1065-Lng-A-T | 38  | chr3:152075050-152075150 |
| chr3 | 152671650 | 152671750 | 1223-Lng-C-T | 52  | chr3:152671650-152671750 |
| chr3 | 152960950 | 152961050 | 1072-Lng-A-T | 78  | chr3:152960950-152961050 |
| chr3 | 153070750 | 153070850 | 1151-Lng-A-T | 69  | chr3:153070750-153070850 |
| chr3 | 153164750 | 153164850 | 1090-Lng-A-T | 76  | chr3:153164750-153164850 |
| chr3 | 153176450 | 153176550 | 1004-Lng-A-T | 54  | chr3:153176450-153176550 |
| chr3 | 153592650 | 153592750 | 901-Lng-C-T  | 111 | chr3:153592650-153592750 |
| chr3 | 153742750 | 153742850 | 1065-Lng-B-T | 39  | chr3:153742750-153742850 |
| chr3 | 154184650 | 154184750 | 1065-Lng-A-T | 66  | chr3:154184650-154184750 |
| chr3 | 154531950 | 154532050 | 1065-Lng-B-T | 88  | chr3:154531950-154532050 |
| chr3 | 154590350 | 154590450 | 1152-Lng-A-T | 515 | chr3:154590350-154590450 |
| chr3 | 154722950 | 154723050 | 846-Lng-A-T  | 188 | chr3:154722950-154723050 |
| chr3 | 154944350 | 154944450 | 1274-Lng-A-T | 65  | chr3:154944350-154944450 |
| chr3 | 154976350 | 154976450 | 1065-Lng-A-T | 80  | chr3:154976350-154976450 |
| chr3 | 155001950 | 155002050 | 901-Lng-B-T  | 106 | chr3:155001950-155002050 |
| chr3 | 155035750 | 155035850 | 1100-Lng-A-T | 56  | chr3:155035750-155035850 |
| chr3 | 155104950 | 155105050 | 901-Lng-C-T  | 57  | chr3:155104950-155105050 |
| chr3 | 155189950 | 155190050 | 1065-Lng-C-T | 66  | chr3:155189950-155190050 |
| chr3 | 155277750 | 155277850 | 1072-Lng-A-T | 48  | chr3:155277750-155277850 |
| chr3 | 155338550 | 155338650 | 1090-Lng-A-T | 96  | chr3:155338550-155338650 |
| chr3 | 155384750 | 155384850 | 1072-Lng-A-T | 74  | chr3:155384750-155384850 |
| chr3 | 155444850 | 155444950 | 901-Lng-A-T  | 51  | chr3:155444850-155444950 |
| chr3 | 155479750 | 155479850 | 1065-Lng-C-T | 69  | chr3:155479750-155479850 |
| chr3 | 155510850 | 155510950 | 1004-Lng-A-T | 89  | chr3:155510850-155510950 |
| chr3 | 155727050 | 155727150 | 1065-Lng-B-T | 80  | chr3:155727050-155727150 |
| chr3 | 155742750 | 155742850 | 1065-Lng-B-T | 41  | chr3:155742750-155742850 |
| chr3 | 155750050 | 155750150 | 1065-Lng-B-T | 52  | chr3:155750050-155750150 |
| chr3 | 156007150 | 156007250 | 901-Lng-C-T  | 29  | chr3:156007150-156007250 |
| chr3 | 156282850 | 156282950 | 1065-Lng-A-T | 127 | chr3:156282850-156282950 |
| chr3 | 156387450 | 156387550 | 901-Lng-C-T  | 85  | chr3:156387450-156387550 |
| chr3 | 156505050 | 156505150 | 1100-Lng-A-T | 108 | chr3:156505050-156505150 |
| chr3 | 156658050 | 156658150 | 1151-Lng-A-T | 241 | chr3:156658050-156658150 |
| chr3 | 156892550 | 156892650 | 1223-Lng-B-T | 63  | chr3:156892550-156892650 |
| chr3 | 156976450 | 156976550 | 901-Lng-B-T  | 106 | chr3:156976450-156976550 |
| chr3 | 157135450 | 157135550 | 1065-Lng-A-T | 84  | chr3:157135450-157135550 |
| chr3 | 157209450 | 157209550 | 901-Lng-A-T  | 571 | chr3:157209450-157209550 |
| chr3 | 157458250 | 157458350 | 1090-Lng-A-T | 73  | chr3:157458250-157458350 |
| chr3 | 157575950 | 157576050 | 1065-Lng-B-T | 42  | chr3:157575950-157576050 |
| chr3 | 157626850 | 157626950 | 1223-Lng-D-T | 47  | chr3:157626850-157626950 |
| chr3 | 157653250 | 157653350 | 1065-Lng-A-T | 115 | chr3:157653250-157653350 |
| chr3 | 157674350 | 157674450 | 846-Lng-A-T  | 155 | chr3:157674350-157674450 |
| chr3 | 157861450 | 157861550 | 1065-Lng-A-T | 81  | chr3:157861450-157861550 |

**Table S2: SB Insertion regions**

|      |           |           |              |      |                          |
|------|-----------|-----------|--------------|------|--------------------------|
| chr3 | 158056650 | 158056750 | 1072-Lng-A-T | 71   | chr3:158056650-158056750 |
| chr3 | 158176050 | 158176150 | 1188-Lng-A-T | 231  | chr3:158176050-158176150 |
| chr3 | 158196250 | 158196350 | 1090-Lng-A-T | 85   | chr3:158196250-158196350 |
| chr3 | 158218250 | 158218350 | 1065-Lng-B-T | 47   | chr3:158218250-158218350 |
| chr3 | 158263450 | 158263550 | 901-Lng-A-T  | 73   | chr3:158263450-158263550 |
| chr3 | 158263450 | 158263550 | 1223-Lng-B-T | 49   | chr3:158263450-158263550 |
| chr3 | 158263450 | 158263550 | 846-Lng-A-T  | 166  | chr3:158263450-158263550 |
| chr3 | 158263450 | 158263550 | 1072-Lng-A-T | 86   | chr3:158263450-158263550 |
| chr3 | 158381350 | 158381450 | 1223-Lng-B-T | 61   | chr3:158381350-158381450 |
| chr3 | 158761650 | 158761750 | 1223-Lng-C-T | 57   | chr3:158761650-158761750 |
| chr3 | 158778450 | 158778550 | 1152-Lng-A-T | 51   | chr3:158778450-158778550 |
| chr3 | 158920650 | 158920750 | 901-Lng-D-T  | 502  | chr3:158920650-158920750 |
| chr3 | 158944850 | 158944950 | 1223-Lng-C-T | 45   | chr3:158944850-158944950 |
| chr3 | 158978450 | 158978550 | 1065-Lng-C-T | 63   | chr3:158978450-158978550 |
| chr3 | 158982950 | 158983050 | 1223-Lng-D-T | 40   | chr3:158982950-158983050 |
| chr3 | 159009550 | 159009650 | 1072-Lng-A-T | 48   | chr3:159009550-159009650 |
| chr3 | 159153950 | 159154050 | 1065-Lng-B-T | 41   | chr3:159153950-159154050 |
| chr3 | 159184950 | 159185050 | 1065-Lng-B-T | 39   | chr3:159184950-159185050 |
| chr3 | 159235050 | 159235150 | 901-Lng-B-T  | 64   | chr3:159235050-159235150 |
| chr3 | 159288150 | 159288250 | 901-Lng-A-T  | 51   | chr3:159288150-159288250 |
| chr3 | 159525550 | 159525650 | 1223-Lng-B-T | 36   | chr3:159525550-159525650 |
| chr3 | 159546350 | 159546450 | 1223-Lng-D-T | 173  | chr3:159546350-159546450 |
| chr3 | 159558150 | 159558250 | 1274-Lng-A-T | 55   | chr3:159558150-159558250 |
| chr3 | 159573750 | 159573850 | 1100-Lng-A-T | 128  | chr3:159573750-159573850 |
| chr3 | 159583450 | 159583550 | 1100-Lng-A-T | 162  | chr3:159583450-159583550 |
| chr3 | 159589850 | 159589950 | 1072-Lng-A-T | 131  | chr3:159589850-159589950 |
| chr4 | 3016350   | 3016450   | 1100-Lng-A-T | 94   | chr4:3016350-3016450     |
| chr4 | 3482750   | 3482850   | 901-Lng-C-T  | 790  | chr4:3482750-3482850     |
| chr4 | 3613350   | 3613450   | 1004-Lng-A-T | 106  | chr4:3613350-3613450     |
| chr4 | 3624950   | 3625050   | 846-Lng-A-T  | 131  | chr4:3624950-3625050     |
| chr4 | 3639950   | 3640050   | 1152-Lng-A-T | 401  | chr4:3639950-3640050     |
| chr4 | 3644050   | 3644150   | 1090-Lng-A-T | 73   | chr4:3644050-3644150     |
| chr4 | 3646250   | 3646350   | 1100-Lng-A-T | 56   | chr4:3646250-3646350     |
| chr4 | 3649750   | 3649850   | 1223-Lng-D-T | 47   | chr4:3649750-3649850     |
| chr4 | 3773150   | 3773250   | 1152-Lng-A-T | 130  | chr4:3773150-3773250     |
| chr4 | 3919250   | 3919350   | 1065-Lng-A-T | 45   | chr4:3919250-3919350     |
| chr4 | 4175350   | 4175450   | 1152-Lng-A-T | 36   | chr4:4175350-4175450     |
| chr4 | 4266450   | 4266550   | 1100-Lng-A-T | 57   | chr4:4266450-4266550     |
| chr4 | 4278350   | 4278450   | 846-Lng-A-T  | 157  | chr4:4278350-4278450     |
| chr4 | 4377150   | 4377250   | 1065-Lng-B-T | 97   | chr4:4377150-4377250     |
| chr4 | 4460850   | 4460950   | 1065-Lng-A-T | 53   | chr4:4460850-4460950     |
| chr4 | 4544050   | 4544150   | 1065-Lng-A-T | 69   | chr4:4544050-4544150     |
| chr4 | 4614850   | 4614950   | 1072-Lng-A-T | 60   | chr4:4614850-4614950     |
| chr4 | 4649550   | 4649650   | 1065-Lng-C-T | 73   | chr4:4649550-4649650     |
| chr4 | 4694550   | 4694650   | 1274-Lng-A-T | 59   | chr4:4694550-4694650     |
| chr4 | 4701250   | 4701350   | 1167-Lng-A-T | 4524 | chr4:4701250-4701350     |

**Table S2: SB Insertion regions**

|      |         |         |              |     |                      |
|------|---------|---------|--------------|-----|----------------------|
| chr4 | 4704950 | 4705050 | 1223-Lng-C-T | 43  | chr4:4704950-4705050 |
| chr4 | 4785950 | 4786050 | 1072-Lng-A-T | 134 | chr4:4785950-4786050 |
| chr4 | 4793850 | 4793950 | 1100-Lng-A-T | 97  | chr4:4793850-4793950 |
| chr4 | 4924250 | 4924350 | 1274-Lng-A-T | 125 | chr4:4924250-4924350 |
| chr4 | 5049850 | 5049950 | 901-Lng-A-T  | 88  | chr4:5049850-5049950 |
| chr4 | 5212450 | 5212550 | 1100-Lng-A-T | 55  | chr4:5212450-5212550 |
| chr4 | 5327650 | 5327750 | 846-Lng-A-T  | 138 | chr4:5327650-5327750 |
| chr4 | 5399450 | 5399550 | 1274-Lng-A-T | 210 | chr4:5399450-5399550 |
| chr4 | 5609550 | 5609650 | 1167-Lng-A-T | 116 | chr4:5609550-5609650 |
| chr4 | 5679750 | 5679850 | 1188-Lng-A-T | 34  | chr4:5679750-5679850 |
| chr4 | 5817450 | 5817550 | 1152-Lng-A-T | 116 | chr4:5817450-5817550 |
| chr4 | 5828450 | 5828550 | 901-Lng-D-T  | 642 | chr4:5828450-5828550 |
| chr4 | 6130350 | 6130450 | 846-Lng-A-T  | 52  | chr4:6130350-6130450 |
| chr4 | 6300550 | 6300650 | 1188-Lng-A-T | 43  | chr4:6300550-6300650 |
| chr4 | 6303450 | 6303550 | 1274-Lng-A-T | 99  | chr4:6303450-6303550 |
| chr4 | 6308550 | 6308650 | 1100-Lng-A-T | 146 | chr4:6308550-6308650 |
| chr4 | 6324750 | 6324850 | 846-Lng-A-T  | 77  | chr4:6324750-6324850 |
| chr4 | 6325650 | 6325750 | 1274-Lng-A-T | 60  | chr4:6325650-6325750 |
| chr4 | 6328450 | 6328550 | 1152-Lng-A-T | 41  | chr4:6328450-6328550 |
| chr4 | 6361650 | 6361750 | 1090-Lng-B-T | 64  | chr4:6361650-6361750 |
| chr4 | 6393050 | 6393150 | 1152-Lng-A-T | 33  | chr4:6393050-6393150 |
| chr4 | 6398050 | 6398150 | 901-Lng-A-T  | 351 | chr4:6398050-6398150 |
| chr4 | 6445150 | 6445250 | 1100-Lng-A-T | 82  | chr4:6445150-6445250 |
| chr4 | 6453150 | 6453250 | 846-Lng-A-T  | 70  | chr4:6453150-6453250 |
| chr4 | 6664250 | 6664350 | 1223-Lng-C-T | 50  | chr4:6664250-6664350 |
| chr4 | 6698950 | 6699050 | 1090-Lng-A-T | 97  | chr4:6698950-6699050 |
| chr4 | 6710550 | 6710650 | 1167-Lng-A-T | 146 | chr4:6710550-6710650 |
| chr4 | 6712950 | 6713050 | 1188-Lng-A-T | 91  | chr4:6712950-6713050 |
| chr4 | 6713250 | 6713350 | 1188-Lng-A-T | 37  | chr4:6713250-6713350 |
| chr4 | 6713750 | 6713850 | 1090-Lng-B-T | 84  | chr4:6713750-6713850 |
| chr4 | 6802350 | 6802450 | 1223-Lng-C-T | 46  | chr4:6802350-6802450 |
| chr4 | 7238250 | 7238350 | 1152-Lng-A-T | 64  | chr4:7238250-7238350 |
| chr4 | 7592250 | 7592350 | 1065-Lng-C-T | 92  | chr4:7592250-7592350 |
| chr4 | 7657750 | 7657850 | 1090-Lng-A-T | 75  | chr4:7657750-7657850 |
| chr4 | 7782550 | 7782650 | 1152-Lng-A-T | 140 | chr4:7782550-7782650 |
| chr4 | 7915650 | 7915750 | 1090-Lng-A-T | 72  | chr4:7915650-7915750 |
| chr4 | 7918550 | 7918650 | 1274-Lng-A-T | 54  | chr4:7918550-7918650 |
| chr4 | 7947250 | 7947350 | 1274-Lng-A-T | 61  | chr4:7947250-7947350 |
| chr4 | 8059850 | 8059950 | 1223-Lng-C-T | 46  | chr4:8059850-8059950 |
| chr4 | 8079150 | 8079250 | 1274-Lng-A-T | 52  | chr4:8079150-8079250 |
| chr4 | 8096150 | 8096250 | 1151-Lng-A-T | 58  | chr4:8096150-8096250 |
| chr4 | 8099750 | 8099850 | 1188-Lng-A-T | 132 | chr4:8099750-8099850 |
| chr4 | 8150750 | 8150850 | 1274-Lng-A-T | 87  | chr4:8150750-8150850 |
| chr4 | 8464350 | 8464450 | 1151-Lng-A-T | 281 | chr4:8464350-8464450 |
| chr4 | 8465450 | 8465550 | 1152-Lng-A-T | 102 | chr4:8465450-8465550 |
| chr4 | 8465850 | 8465950 | 1100-Lng-A-T | 65  | chr4:8465850-8465950 |

**Table S2: SB Insertion regions**

|      |          |          |              |      |                        |
|------|----------|----------|--------------|------|------------------------|
| chr4 | 8469450  | 8469550  | 901-Lng-B-T  | 108  | chr4:8469450-8469550   |
| chr4 | 8469550  | 8469650  | 1152-Lng-A-T | 92   | chr4:8469550-8469650   |
| chr4 | 8473950  | 8474050  | 1152-Lng-A-T | 103  | chr4:8473950-8474050   |
| chr4 | 8498650  | 8498750  | 846-Lng-A-T  | 46   | chr4:8498650-8498750   |
| chr4 | 8499850  | 8499950  | 901-Lng-B-T  | 299  | chr4:8499850-8499950   |
| chr4 | 8501750  | 8501850  | 1152-Lng-A-T | 300  | chr4:8501750-8501850   |
| chr4 | 8518150  | 8518250  | 1188-Lng-A-T | 243  | chr4:8518150-8518250   |
| chr4 | 8522650  | 8522750  | 1004-Lng-A-T | 64   | chr4:8522650-8522750   |
| chr4 | 8533950  | 8534050  | 1151-Lng-A-T | 525  | chr4:8533950-8534050   |
| chr4 | 8619550  | 8619650  | 1151-Lng-A-T | 286  | chr4:8619550-8619650   |
| chr4 | 8638350  | 8638450  | 846-Lng-A-T  | 99   | chr4:8638350-8638450   |
| chr4 | 8646450  | 8646550  | 846-Lng-A-T  | 49   | chr4:8646450-8646550   |
| chr4 | 8648950  | 8649050  | 1223-Lng-B-T | 34   | chr4:8648950-8649050   |
| chr4 | 8728350  | 8728450  | 1090-Lng-B-T | 261  | chr4:8728350-8728450   |
| chr4 | 8783550  | 8783650  | 1072-Lng-A-T | 72   | chr4:8783550-8783650   |
| chr4 | 9089850  | 9089950  | 1090-Lng-A-T | 80   | chr4:9089850-9089950   |
| chr4 | 9248650  | 9248750  | 1100-Lng-B-T | 114  | chr4:9248650-9248750   |
| chr4 | 9337750  | 9337850  | 1152-Lng-A-T | 103  | chr4:9337750-9337850   |
| chr4 | 9589450  | 9589550  | 1223-Lng-D-T | 88   | chr4:9589450-9589550   |
| chr4 | 9602650  | 9602750  | 1223-Lng-D-T | 130  | chr4:9602650-9602750   |
| chr4 | 9671950  | 9672050  | 1065-Lng-C-T | 97   | chr4:9671950-9672050   |
| chr4 | 9876850  | 9876950  | 1151-Lng-A-T | 176  | chr4:9876850-9876950   |
| chr4 | 10192450 | 10192550 | 1065-Lng-A-T | 508  | chr4:10192450-10192550 |
| chr4 | 10350250 | 10350350 | 901-Lng-C-T  | 35   | chr4:10350250-10350350 |
| chr4 | 10464050 | 10464150 | 846-Lng-A-T  | 75   | chr4:10464050-10464150 |
| chr4 | 10481950 | 10482050 | 1065-Lng-A-T | 36   | chr4:10481950-10482050 |
| chr4 | 10492050 | 10492150 | 1090-Lng-B-T | 461  | chr4:10492050-10492150 |
| chr4 | 10714850 | 10714950 | 901-Lng-C-T  | 68   | chr4:10714850-10714950 |
| chr4 | 10789650 | 10789750 | 1188-Lng-A-T | 47   | chr4:10789650-10789750 |
| chr4 | 10799150 | 10799250 | 1072-Lng-A-T | 61   | chr4:10799150-10799250 |
| chr4 | 10804550 | 10804650 | 1065-Lng-C-T | 123  | chr4:10804550-10804650 |
| chr4 | 10811050 | 10811150 | 1065-Lng-A-T | 475  | chr4:10811050-10811150 |
| chr4 | 10812150 | 10812250 | 1100-Lng-A-T | 102  | chr4:10812150-10812250 |
| chr4 | 10822350 | 10822450 | 901-Lng-B-T  | 237  | chr4:10822350-10822450 |
| chr4 | 10829950 | 10830050 | 1065-Lng-B-T | 48   | chr4:10829950-10830050 |
| chr4 | 10858050 | 10858150 | 1151-Lng-A-T | 238  | chr4:10858050-10858150 |
| chr4 | 10910550 | 10910650 | 1065-Lng-C-T | 2358 | chr4:10910550-10910650 |
| chr4 | 10945450 | 10945550 | 1100-Lng-A-T | 71   | chr4:10945450-10945550 |
| chr4 | 10978550 | 10978650 | 1274-Lng-A-T | 106  | chr4:10978550-10978650 |
| chr4 | 11086950 | 11087050 | 1151-Lng-A-T | 177  | chr4:11086950-11087050 |
| chr4 | 11122350 | 11122450 | 1167-Lng-A-T | 46   | chr4:11122350-11122450 |
| chr4 | 11138450 | 11138550 | 1152-Lng-A-T | 61   | chr4:11138450-11138550 |
| chr4 | 11144250 | 11144350 | 901-Lng-A-T  | 65   | chr4:11144250-11144350 |
| chr4 | 11281850 | 11281950 | 1152-Lng-A-T | 103  | chr4:11281850-11281950 |
| chr4 | 11285550 | 11285650 | 1223-Lng-C-T | 85   | chr4:11285550-11285650 |
| chr4 | 11311350 | 11311450 | 1151-Lng-A-T | 180  | chr4:11311350-11311450 |

**Table S2: SB Insertion regions**

|      |          |          |              |     |                        |
|------|----------|----------|--------------|-----|------------------------|
| chr4 | 11319250 | 11319350 | 1274-Lng-A-T | 150 | chr4:11319250-11319350 |
| chr4 | 11417450 | 11417550 | 1151-Lng-A-T | 135 | chr4:11417450-11417550 |
| chr4 | 11686650 | 11686750 | 901-Lng-C-T  | 50  | chr4:11686650-11686750 |
| chr4 | 11778950 | 11779050 | 1072-Lng-A-T | 65  | chr4:11778950-11779050 |
| chr4 | 12019350 | 12019450 | 901-Lng-C-T  | 38  | chr4:12019350-12019450 |
| chr4 | 12025550 | 12025650 | 1100-Lng-A-T | 145 | chr4:12025550-12025650 |
| chr4 | 12070250 | 12070350 | 1065-Lng-C-T | 78  | chr4:12070250-12070350 |
| chr4 | 12076550 | 12076650 | 846-Lng-A-T  | 56  | chr4:12076550-12076650 |
| chr4 | 12085450 | 12085550 | 1090-Lng-A-T | 64  | chr4:12085450-12085550 |
| chr4 | 12153250 | 12153350 | 1223-Lng-A-T | 170 | chr4:12153250-12153350 |
| chr4 | 12220950 | 12221050 | 901-Lng-C-T  | 48  | chr4:12220950-12221050 |
| chr4 | 12353250 | 12353350 | 1090-Lng-B-T | 145 | chr4:12353250-12353350 |
| chr4 | 12372050 | 12372150 | 1065-Lng-B-T | 68  | chr4:12372050-12372150 |
| chr4 | 12520950 | 12521050 | 1274-Lng-A-T | 82  | chr4:12520950-12521050 |
| chr4 | 12761650 | 12761750 | 1100-Lng-A-T | 95  | chr4:12761650-12761750 |
| chr4 | 13229950 | 13230050 | 846-Lng-A-T  | 421 | chr4:13229950-13230050 |
| chr4 | 13278450 | 13278550 | 901-Lng-B-T  | 356 | chr4:13278450-13278550 |
| chr4 | 13286050 | 13286150 | 1223-Lng-A-T | 202 | chr4:13286050-13286150 |
| chr4 | 13343350 | 13343450 | 1188-Lng-A-T | 178 | chr4:13343350-13343450 |
| chr4 | 13456450 | 13456550 | 1090-Lng-A-T | 101 | chr4:13456450-13456550 |
| chr4 | 13635450 | 13635550 | 1072-Lng-A-T | 146 | chr4:13635450-13635550 |
| chr4 | 13772450 | 13772550 | 1100-Lng-A-T | 136 | chr4:13772450-13772550 |
| chr4 | 14016950 | 14017050 | 1223-Lng-B-T | 55  | chr4:14016950-14017050 |
| chr4 | 14026150 | 14026250 | 1065-Lng-B-T | 45  | chr4:14026150-14026250 |
| chr4 | 14071950 | 14072050 | 1100-Lng-A-T | 51  | chr4:14071950-14072050 |
| chr4 | 14385050 | 14385150 | 1072-Lng-A-T | 246 | chr4:14385050-14385150 |
| chr4 | 14452150 | 14452250 | 1223-Lng-D-T | 42  | chr4:14452150-14452250 |
| chr4 | 14468250 | 14468350 | 1100-Lng-A-T | 73  | chr4:14468250-14468350 |
| chr4 | 14492550 | 14492650 | 1072-Lng-A-T | 59  | chr4:14492550-14492650 |
| chr4 | 14733650 | 14733750 | 1152-Lng-A-T | 110 | chr4:14733650-14733750 |
| chr4 | 14805550 | 14805650 | 1188-Lng-A-T | 39  | chr4:14805550-14805650 |
| chr4 | 14809950 | 14810050 | 901-Lng-B-T  | 91  | chr4:14809950-14810050 |
| chr4 | 14813550 | 14813650 | 1100-Lng-A-T | 56  | chr4:14813550-14813650 |
| chr4 | 14864450 | 14864550 | 1223-Lng-C-T | 117 | chr4:14864450-14864550 |
| chr4 | 14885150 | 14885250 | 1100-Lng-B-T | 53  | chr4:14885150-14885250 |
| chr4 | 14917050 | 14917150 | 1151-Lng-A-T | 227 | chr4:14917050-14917150 |
| chr4 | 14964450 | 14964550 | 1151-Lng-A-T | 67  | chr4:14964450-14964550 |
| chr4 | 15018350 | 15018450 | 1223-Lng-B-T | 66  | chr4:15018350-15018450 |
| chr4 | 15025350 | 15025450 | 1223-Lng-A-T | 228 | chr4:15025350-15025450 |
| chr4 | 15140450 | 15140550 | 1188-Lng-A-T | 34  | chr4:15140450-15140550 |
| chr4 | 15195050 | 15195150 | 1090-Lng-B-T | 454 | chr4:15195050-15195150 |
| chr4 | 15195350 | 15195450 | 1188-Lng-A-T | 159 | chr4:15195350-15195450 |
| chr4 | 15197550 | 15197650 | 1223-Lng-A-T | 78  | chr4:15197550-15197650 |
| chr4 | 15237850 | 15237950 | 901-Lng-C-T  | 211 | chr4:15237850-15237950 |
| chr4 | 15625450 | 15625550 | 1274-Lng-A-T | 80  | chr4:15625450-15625550 |
| chr4 | 15694750 | 15694850 | 901-Lng-A-T  | 79  | chr4:15694750-15694850 |



**Table S2: SB Insertion regions**

|      |          |          |              |      |                        |
|------|----------|----------|--------------|------|------------------------|
| chr4 | 15867450 | 15867550 | 1188-Lng-A-T | 36   | chr4:15867450-15867550 |
| chr4 | 15901650 | 15901750 | 901-Lng-A-T  | 160  | chr4:15901650-15901750 |
| chr4 | 15902950 | 15903050 | 1100-Lng-A-T | 66   | chr4:15902950-15903050 |
| chr4 | 15916050 | 15916150 | 901-Lng-A-T  | 138  | chr4:15916050-15916150 |
| chr4 | 15918250 | 15918350 | 901-Lng-D-T  | 180  | chr4:15918250-15918350 |
| chr4 | 15921350 | 15921450 | 1223-Lng-D-T | 40   | chr4:15921350-15921450 |
| chr4 | 16047550 | 16047650 | 1223-Lng-C-T | 58   | chr4:16047550-16047650 |
| chr4 | 16077850 | 16077950 | 1152-Lng-A-T | 100  | chr4:16077850-16077950 |
| chr4 | 16086750 | 16086850 | 1072-Lng-A-T | 52   | chr4:16086750-16086850 |
| chr4 | 16583850 | 16583950 | 1188-Lng-A-T | 323  | chr4:16583850-16583950 |
| chr4 | 16638950 | 16639050 | 1274-Lng-A-T | 55   | chr4:16638950-16639050 |
| chr4 | 16744350 | 16744450 | 1152-Lng-A-T | 83   | chr4:16744350-16744450 |
| chr4 | 16926450 | 16926550 | 901-Lng-B-T  | 516  | chr4:16926450-16926550 |
| chr4 | 17073850 | 17073950 | 1188-Lng-A-T | 43   | chr4:17073850-17073950 |
| chr4 | 17088750 | 17088850 | 846-Lng-A-T  | 160  | chr4:17088750-17088850 |
| chr4 | 17094850 | 17094950 | 901-Lng-C-T  | 46   | chr4:17094850-17094950 |
| chr4 | 17155650 | 17155750 | 901-Lng-A-T  | 53   | chr4:17155650-17155750 |
| chr4 | 17366750 | 17366850 | 1065-Lng-B-T | 76   | chr4:17366750-17366850 |
| chr4 | 17450250 | 17450350 | 901-Lng-C-T  | 76   | chr4:17450250-17450350 |
| chr4 | 17510750 | 17510850 | 1004-Lng-A-T | 74   | chr4:17510750-17510850 |
| chr4 | 17578350 | 17578450 | 1090-Lng-A-T | 78   | chr4:17578350-17578450 |
| chr4 | 17749550 | 17749650 | 901-Lng-A-T  | 54   | chr4:17749550-17749650 |
| chr4 | 17836750 | 17836850 | 901-Lng-A-T  | 89   | chr4:17836750-17836850 |
| chr4 | 17849550 | 17849650 | 901-Lng-D-T  | 90   | chr4:17849550-17849650 |
| chr4 | 17877350 | 17877450 | 1090-Lng-A-T | 819  | chr4:17877350-17877450 |
| chr4 | 18047650 | 18047750 | 1167-Lng-A-T | 54   | chr4:18047650-18047750 |
| chr4 | 18068950 | 18069050 | 1152-Lng-A-T | 59   | chr4:18068950-18069050 |
| chr4 | 18512150 | 18512250 | 901-Lng-B-T  | 128  | chr4:18512150-18512250 |
| chr4 | 18556250 | 18556350 | 901-Lng-C-T  | 29   | chr4:18556250-18556350 |
| chr4 | 18720550 | 18720650 | 1152-Lng-A-T | 123  | chr4:18720550-18720650 |
| chr4 | 18725450 | 18725550 | 1090-Lng-A-T | 47   | chr4:18725450-18725550 |
| chr4 | 18763550 | 18763650 | 1152-Lng-A-T | 235  | chr4:18763550-18763650 |
| chr4 | 18769450 | 18769550 | 1274-Lng-A-T | 84   | chr4:18769450-18769550 |
| chr4 | 18867950 | 18868050 | 1152-Lng-A-T | 99   | chr4:18867950-18868050 |
| chr4 | 18971150 | 18971250 | 1065-Lng-A-T | 36   | chr4:18971150-18971250 |
| chr4 | 19343550 | 19343650 | 1223-Lng-C-T | 58   | chr4:19343550-19343650 |
| chr4 | 19456750 | 19456850 | 1065-Lng-B-T | 99   | chr4:19456750-19456850 |
| chr4 | 19468150 | 19468250 | 901-Lng-A-T  | 85   | chr4:19468150-19468250 |
| chr4 | 19485650 | 19485750 | 1090-Lng-A-T | 55   | chr4:19485650-19485750 |
| chr4 | 19506750 | 19506850 | 1100-Lng-A-T | 1157 | chr4:19506750-19506850 |
| chr4 | 19510350 | 19510450 | 1151-Lng-A-T | 66   | chr4:19510350-19510450 |
| chr4 | 19531250 | 19531350 | 1151-Lng-A-T | 99   | chr4:19531250-19531350 |
| chr4 | 19531250 | 19531350 | 1167-Lng-A-T | 246  | chr4:19531250-19531350 |
| chr4 | 19536250 | 19536350 | 901-Lng-D-T  | 226  | chr4:19536250-19536350 |
| chr4 | 19544650 | 19544750 | 1100-Lng-A-T | 251  | chr4:19544650-19544750 |
| chr4 | 19554250 | 19554350 | 1152-Lng-A-T | 66   | chr4:19554250-19554350 |

**Table S2: SB Insertion regions**

|      |          |          |              |      |                        |
|------|----------|----------|--------------|------|------------------------|
| chr4 | 19555650 | 19555750 | 1274-Lng-A-T | 88   | chr4:19555650-19555750 |
| chr4 | 19560250 | 19560350 | 1152-Lng-A-T | 405  | chr4:19560250-19560350 |
| chr4 | 19566850 | 19566950 | 1100-Lng-B-T | 81   | chr4:19566850-19566950 |
| chr4 | 19597650 | 19597750 | 1223-Lng-B-T | 46   | chr4:19597650-19597750 |
| chr4 | 19600850 | 19600950 | 1065-Lng-A-T | 47   | chr4:19600850-19600950 |
| chr4 | 19600850 | 19600950 | 1223-Lng-D-T | 41   | chr4:19600850-19600950 |
| chr4 | 19617250 | 19617350 | 1152-Lng-A-T | 72   | chr4:19617250-19617350 |
| chr4 | 19634550 | 19634650 | 1151-Lng-A-T | 57   | chr4:19634550-19634650 |
| chr4 | 19657050 | 19657150 | 1100-Lng-A-T | 99   | chr4:19657050-19657150 |
| chr4 | 19895850 | 19895950 | 1090-Lng-B-T | 1104 | chr4:19895850-19895950 |
| chr4 | 20204250 | 20204350 | 1223-Lng-A-T | 133  | chr4:20204250-20204350 |
| chr4 | 20211050 | 20211150 | 1167-Lng-A-T | 55   | chr4:20211050-20211150 |
| chr4 | 20467850 | 20467950 | 846-Lng-A-T  | 170  | chr4:20467850-20467950 |
| chr4 | 20500950 | 20501050 | 901-Lng-D-T  | 162  | chr4:20500950-20501050 |
| chr4 | 20546650 | 20546750 | 1090-Lng-B-T | 401  | chr4:20546650-20546750 |
| chr4 | 20626350 | 20626450 | 1090-Lng-A-T | 60   | chr4:20626350-20626450 |
| chr4 | 20670350 | 20670450 | 1152-Lng-A-T | 79   | chr4:20670350-20670450 |
| chr4 | 20923350 | 20923450 | 1223-Lng-D-T | 41   | chr4:20923350-20923450 |
| chr4 | 21263750 | 21263850 | 1090-Lng-B-T | 125  | chr4:21263750-21263850 |
| chr4 | 21295350 | 21295450 | 1274-Lng-A-T | 54   | chr4:21295350-21295450 |
| chr4 | 21678850 | 21678950 | 1100-Lng-A-T | 126  | chr4:21678850-21678950 |
| chr4 | 21729650 | 21729750 | 1274-Lng-A-T | 51   | chr4:21729650-21729750 |
| chr4 | 21761450 | 21761550 | 1065-Lng-C-T | 77   | chr4:21761450-21761550 |
| chr4 | 21778750 | 21778850 | 1274-Lng-A-T | 275  | chr4:21778750-21778850 |
| chr4 | 21790550 | 21790650 | 1065-Lng-B-T | 89   | chr4:21790550-21790650 |
| chr4 | 21797750 | 21797850 | 1100-Lng-A-T | 66   | chr4:21797750-21797850 |
| chr4 | 21804350 | 21804450 | 1188-Lng-A-T | 108  | chr4:21804350-21804450 |
| chr4 | 21843650 | 21843750 | 1151-Lng-A-T | 81   | chr4:21843650-21843750 |
| chr4 | 22065350 | 22065450 | 1223-Lng-A-T | 524  | chr4:22065350-22065450 |
| chr4 | 22107050 | 22107150 | 1065-Lng-B-T | 66   | chr4:22107050-22107150 |
| chr4 | 22355050 | 22355150 | 1065-Lng-A-T | 78   | chr4:22355050-22355150 |
| chr4 | 22593250 | 22593350 | 901-Lng-C-T  | 158  | chr4:22593250-22593350 |
| chr4 | 22804850 | 22804950 | 1167-Lng-A-T | 97   | chr4:22804850-22804950 |
| chr4 | 22827250 | 22827350 | 1223-Lng-C-T | 52   | chr4:22827250-22827350 |
| chr4 | 22921350 | 22921450 | 1152-Lng-A-T | 49   | chr4:22921350-22921450 |
| chr4 | 23053750 | 23053850 | 901-Lng-A-T  | 117  | chr4:23053750-23053850 |
| chr4 | 23113250 | 23113350 | 1274-Lng-A-T | 57   | chr4:23113250-23113350 |
| chr4 | 23273450 | 23273550 | 1274-Lng-A-T | 55   | chr4:23273450-23273550 |
| chr4 | 23284950 | 23285050 | 1152-Lng-A-T | 51   | chr4:23284950-23285050 |
| chr4 | 23307450 | 23307550 | 1090-Lng-B-T | 584  | chr4:23307450-23307550 |
| chr4 | 23307750 | 23307850 | 1100-Lng-A-T | 72   | chr4:23307750-23307850 |
| chr4 | 23327950 | 23328050 | 1152-Lng-A-T | 31   | chr4:23327950-23328050 |
| chr4 | 23332150 | 23332250 | 846-Lng-A-T  | 144  | chr4:23332150-23332250 |
| chr4 | 23370250 | 23370350 | 1152-Lng-A-T | 56   | chr4:23370250-23370350 |
| chr4 | 23425950 | 23426050 | 1100-Lng-A-T | 145  | chr4:23425950-23426050 |
| chr4 | 23432750 | 23432850 | 846-Lng-A-T  | 67   | chr4:23432750-23432850 |

**Table S2: SB Insertion regions**

|      |          |          |              |      |                        |
|------|----------|----------|--------------|------|------------------------|
| chr4 | 23652250 | 23652350 | 1072-Lng-A-T | 52   | chr4:23652250-23652350 |
| chr4 | 23664450 | 23664550 | 846-Lng-A-T  | 96   | chr4:23664450-23664550 |
| chr4 | 23682550 | 23682650 | 1152-Lng-A-T | 71   | chr4:23682550-23682650 |
| chr4 | 23935850 | 23935950 | 1065-Lng-C-T | 1011 | chr4:23935850-23935950 |
| chr4 | 24441050 | 24441150 | 1072-Lng-A-T | 51   | chr4:24441050-24441150 |
| chr4 | 24470050 | 24470150 | 1167-Lng-A-T | 103  | chr4:24470050-24470150 |
| chr4 | 24539750 | 24539850 | 1065-Lng-A-T | 42   | chr4:24539750-24539850 |
| chr4 | 24623750 | 24623850 | 901-Lng-D-T  | 78   | chr4:24623750-24623850 |
| chr4 | 24674350 | 24674450 | 1072-Lng-A-T | 54   | chr4:24674350-24674450 |
| chr4 | 24768350 | 24768450 | 1152-Lng-A-T | 234  | chr4:24768350-24768450 |
| chr4 | 24890550 | 24890650 | 1274-Lng-A-T | 141  | chr4:24890550-24890650 |
| chr4 | 25178650 | 25178750 | 1072-Lng-A-T | 59   | chr4:25178650-25178750 |
| chr4 | 25360050 | 25360150 | 846-Lng-A-T  | 45   | chr4:25360050-25360150 |
| chr4 | 25772850 | 25772950 | 1090-Lng-A-T | 1255 | chr4:25772850-25772950 |
| chr4 | 25987750 | 25987850 | 1065-Lng-B-T | 77   | chr4:25987750-25987850 |
| chr4 | 26243350 | 26243450 | 1065-Lng-C-T | 93   | chr4:26243350-26243450 |
| chr4 | 26250450 | 26250550 | 901-Lng-C-T  | 34   | chr4:26250450-26250550 |
| chr4 | 26255950 | 26256050 | 901-Lng-D-T  | 126  | chr4:26255950-26256050 |
| chr4 | 26275550 | 26275650 | 1090-Lng-A-T | 125  | chr4:26275550-26275650 |
| chr4 | 26339850 | 26339950 | 1223-Lng-D-T | 56   | chr4:26339850-26339950 |
| chr4 | 26470150 | 26470250 | 901-Lng-C-T  | 41   | chr4:26470150-26470250 |
| chr4 | 26521250 | 26521350 | 1090-Lng-A-T | 99   | chr4:26521250-26521350 |
| chr4 | 26604750 | 26604850 | 1065-Lng-C-T | 73   | chr4:26604750-26604850 |
| chr4 | 26617550 | 26617650 | 1274-Lng-A-T | 193  | chr4:26617550-26617650 |
| chr4 | 26659450 | 26659550 | 1151-Lng-A-T | 287  | chr4:26659450-26659550 |
| chr4 | 26659850 | 26659950 | 1090-Lng-A-T | 78   | chr4:26659850-26659950 |
| chr4 | 26778350 | 26778450 | 1065-Lng-A-T | 68   | chr4:26778350-26778450 |
| chr4 | 26819650 | 26819750 | 1152-Lng-A-T | 85   | chr4:26819650-26819750 |
| chr4 | 26949350 | 26949450 | 1152-Lng-A-T | 58   | chr4:26949350-26949450 |
| chr4 | 26967950 | 26968050 | 1152-Lng-A-T | 41   | chr4:26967950-26968050 |
| chr4 | 26999550 | 26999650 | 901-Lng-B-T  | 164  | chr4:26999550-26999650 |
| chr4 | 27037850 | 27037950 | 1065-Lng-A-T | 73   | chr4:27037850-27037950 |
| chr4 | 27174150 | 27174250 | 1100-Lng-A-T | 64   | chr4:27174150-27174250 |
| chr4 | 27301350 | 27301450 | 1152-Lng-A-T | 92   | chr4:27301350-27301450 |
| chr4 | 27379650 | 27379750 | 901-Lng-D-T  | 219  | chr4:27379650-27379750 |
| chr4 | 27500650 | 27500750 | 1188-Lng-A-T | 144  | chr4:27500650-27500750 |
| chr4 | 27522350 | 27522450 | 1100-Lng-A-T | 142  | chr4:27522350-27522450 |
| chr4 | 27693350 | 27693450 | 1072-Lng-A-T | 180  | chr4:27693350-27693450 |
| chr4 | 27865050 | 27865150 | 1223-Lng-A-T | 106  | chr4:27865050-27865150 |
| chr4 | 28028950 | 28029050 | 1100-Lng-A-T | 112  | chr4:28028950-28029050 |
| chr4 | 28062150 | 28062250 | 1274-Lng-A-T | 84   | chr4:28062150-28062250 |
| chr4 | 28104050 | 28104150 | 901-Lng-C-T  | 848  | chr4:28104050-28104150 |
| chr4 | 28104850 | 28104950 | 901-Lng-A-T  | 477  | chr4:28104850-28104950 |
| chr4 | 28125350 | 28125450 | 1065-Lng-B-T | 82   | chr4:28125350-28125450 |
| chr4 | 28137350 | 28137450 | 1274-Lng-A-T | 73   | chr4:28137350-28137450 |
| chr4 | 28268050 | 28268150 | 1152-Lng-A-T | 99   | chr4:28268050-28268150 |

**Table S2: SB Insertion regions**

|      |          |          |              |      |                        |
|------|----------|----------|--------------|------|------------------------|
| chr4 | 28307950 | 28308050 | 1065-Lng-B-T | 43   | chr4:28307950-28308050 |
| chr4 | 28399250 | 28399350 | 1065-Lng-B-T | 74   | chr4:28399250-28399350 |
| chr4 | 28768550 | 28768650 | 1065-Lng-A-T | 81   | chr4:28768550-28768650 |
| chr4 | 28808750 | 28808850 | 1223-Lng-A-T | 120  | chr4:28808750-28808850 |
| chr4 | 29173150 | 29173250 | 1065-Lng-A-T | 69   | chr4:29173150-29173250 |
| chr4 | 29548550 | 29548650 | 1072-Lng-A-T | 148  | chr4:29548550-29548650 |
| chr4 | 29647350 | 29647450 | 1100-Lng-A-T | 71   | chr4:29647350-29647450 |
| chr4 | 29657650 | 29657750 | 1223-Lng-C-T | 46   | chr4:29657650-29657750 |
| chr4 | 29713550 | 29713650 | 1004-Lng-A-T | 57   | chr4:29713550-29713650 |
| chr4 | 29760750 | 29760850 | 1065-Lng-A-T | 89   | chr4:29760750-29760850 |
| chr4 | 29787650 | 29787750 | 901-Lng-B-T  | 191  | chr4:29787650-29787750 |
| chr4 | 29957350 | 29957450 | 1152-Lng-A-T | 42   | chr4:29957350-29957450 |
| chr4 | 30074950 | 30075050 | 1065-Lng-B-T | 54   | chr4:30074950-30075050 |
| chr4 | 30324050 | 30324150 | 1065-Lng-C-T | 68   | chr4:30324050-30324150 |
| chr4 | 30363850 | 30363950 | 901-Lng-B-T  | 227  | chr4:30363850-30363950 |
| chr4 | 30803950 | 30804050 | 1100-Lng-A-T | 135  | chr4:30803950-30804050 |
| chr4 | 30820950 | 30821050 | 1223-Lng-D-T | 50   | chr4:30820950-30821050 |
| chr4 | 30934550 | 30934650 | 1152-Lng-A-T | 98   | chr4:30934550-30934650 |
| chr4 | 31138250 | 31138350 | 901-Lng-B-T  | 95   | chr4:31138250-31138350 |
| chr4 | 31263150 | 31263250 | 1004-Lng-A-T | 79   | chr4:31263150-31263250 |
| chr4 | 31333150 | 31333250 | 1223-Lng-B-T | 38   | chr4:31333150-31333250 |
| chr4 | 31333250 | 31333350 | 1004-Lng-A-T | 161  | chr4:31333250-31333350 |
| chr4 | 31340950 | 31341050 | 1065-Lng-B-T | 103  | chr4:31340950-31341050 |
| chr4 | 31372150 | 31372250 | 1090-Lng-B-T | 129  | chr4:31372150-31372250 |
| chr4 | 31382350 | 31382450 | 1151-Lng-A-T | 1140 | chr4:31382350-31382450 |
| chr4 | 31713350 | 31713450 | 901-Lng-D-T  | 230  | chr4:31713350-31713450 |
| chr4 | 32053450 | 32053550 | 1274-Lng-A-T | 62   | chr4:32053450-32053550 |
| chr4 | 32057350 | 32057450 | 1152-Lng-A-T | 141  | chr4:32057350-32057450 |
| chr4 | 32083950 | 32084050 | 1223-Lng-B-T | 465  | chr4:32083950-32084050 |
| chr4 | 32090150 | 32090250 | 1065-Lng-B-T | 53   | chr4:32090150-32090250 |
| chr4 | 32098950 | 32099050 | 1151-Lng-A-T | 334  | chr4:32098950-32099050 |
| chr4 | 32282350 | 32282450 | 1100-Lng-A-T | 149  | chr4:32282350-32282450 |
| chr4 | 32286550 | 32286650 | 1100-Lng-A-T | 240  | chr4:32286550-32286650 |
| chr4 | 32334350 | 32334450 | 1188-Lng-A-T | 42   | chr4:32334350-32334450 |
| chr4 | 32338450 | 32338550 | 1100-Lng-A-T | 55   | chr4:32338450-32338550 |
| chr4 | 32369150 | 32369250 | 1274-Lng-A-T | 179  | chr4:32369150-32369250 |
| chr4 | 32405850 | 32405950 | 1065-Lng-B-T | 126  | chr4:32405850-32405950 |
| chr4 | 32608250 | 32608350 | 901-Lng-A-T  | 379  | chr4:32608250-32608350 |
| chr4 | 32737350 | 32737450 | 1152-Lng-A-T | 311  | chr4:32737350-32737450 |
| chr4 | 32807550 | 32807650 | 901-Lng-C-T  | 213  | chr4:32807550-32807650 |
| chr4 | 33104450 | 33104550 | 1100-Lng-B-T | 55   | chr4:33104450-33104550 |
| chr4 | 33139050 | 33139150 | 901-Lng-A-T  | 299  | chr4:33139050-33139150 |
| chr4 | 33294450 | 33294550 | 1065-Lng-A-T | 93   | chr4:33294450-33294550 |
| chr4 | 33405550 | 33405650 | 901-Lng-C-T  | 200  | chr4:33405550-33405650 |
| chr4 | 33419650 | 33419750 | 1090-Lng-A-T | 599  | chr4:33419650-33419750 |
| chr4 | 33498050 | 33498150 | 1223-Lng-B-T | 49   | chr4:33498050-33498150 |

**Table S2: SB Insertion regions**

|      |          |          |              |      |                        |
|------|----------|----------|--------------|------|------------------------|
| chr4 | 33911550 | 33911650 | 1152-Lng-A-T | 82   | chr4:33911550-33911650 |
| chr4 | 34216650 | 34216750 | 1152-Lng-A-T | 32   | chr4:34216650-34216750 |
| chr4 | 34508150 | 34508250 | 1274-Lng-A-T | 77   | chr4:34508150-34508250 |
| chr4 | 34519850 | 34519950 | 1100-Lng-A-T | 98   | chr4:34519850-34519950 |
| chr4 | 34522050 | 34522150 | 1100-Lng-A-T | 448  | chr4:34522050-34522150 |
| chr4 | 34545550 | 34545650 | 846-Lng-A-T  | 64   | chr4:34545550-34545650 |
| chr4 | 34585150 | 34585250 | 1065-Lng-B-T | 77   | chr4:34585150-34585250 |
| chr4 | 34626450 | 34626550 | 901-Lng-A-T  | 88   | chr4:34626450-34626550 |
| chr4 | 34716850 | 34716950 | 1223-Lng-A-T | 91   | chr4:34716850-34716950 |
| chr4 | 34767850 | 34767950 | 1151-Lng-A-T | 73   | chr4:34767850-34767950 |
| chr4 | 34769550 | 34769650 | 1151-Lng-A-T | 98   | chr4:34769550-34769650 |
| chr4 | 34779550 | 34779650 | 1274-Lng-A-T | 71   | chr4:34779550-34779650 |
| chr4 | 34781450 | 34781550 | 1274-Lng-A-T | 95   | chr4:34781450-34781550 |
| chr4 | 34782150 | 34782250 | 1100-Lng-A-T | 124  | chr4:34782150-34782250 |
| chr4 | 34879550 | 34879650 | 1100-Lng-A-T | 70   | chr4:34879550-34879650 |
| chr4 | 34946150 | 34946250 | 1004-Lng-A-T | 117  | chr4:34946150-34946250 |
| chr4 | 34949550 | 34949650 | 1223-Lng-B-T | 42   | chr4:34949550-34949650 |
| chr4 | 34972850 | 34972950 | 1090-Lng-B-T | 365  | chr4:34972850-34972950 |
| chr4 | 35033050 | 35033150 | 1065-Lng-C-T | 85   | chr4:35033050-35033150 |
| chr4 | 35044850 | 35044950 | 1274-Lng-A-T | 73   | chr4:35044850-35044950 |
| chr4 | 35059550 | 35059650 | 1274-Lng-A-T | 218  | chr4:35059550-35059650 |
| chr4 | 35059850 | 35059950 | 1151-Lng-A-T | 69   | chr4:35059850-35059950 |
| chr4 | 35063650 | 35063750 | 1100-Lng-A-T | 52   | chr4:35063650-35063750 |
| chr4 | 35095850 | 35095950 | 1065-Lng-B-T | 54   | chr4:35095850-35095950 |
| chr4 | 35113450 | 35113550 | 901-Lng-B-T  | 191  | chr4:35113450-35113550 |
| chr4 | 35620550 | 35620650 | 1090-Lng-A-T | 49   | chr4:35620550-35620650 |
| chr4 | 35680250 | 35680350 | 1065-Lng-B-T | 48   | chr4:35680250-35680350 |
| chr4 | 35906950 | 35907050 | 1274-Lng-A-T | 104  | chr4:35906950-35907050 |
| chr4 | 35960350 | 35960450 | 1065-Lng-C-T | 79   | chr4:35960350-35960450 |
| chr4 | 35977150 | 35977250 | 1274-Lng-A-T | 90   | chr4:35977150-35977250 |
| chr4 | 36036650 | 36036750 | 1065-Lng-C-T | 82   | chr4:36036650-36036750 |
| chr4 | 36062250 | 36062350 | 1223-Lng-A-T | 1998 | chr4:36062250-36062350 |
| chr4 | 36098450 | 36098550 | 1167-Lng-A-T | 66   | chr4:36098450-36098550 |
| chr4 | 36280350 | 36280450 | 901-Lng-B-T  | 40   | chr4:36280350-36280450 |
| chr4 | 36364950 | 36365050 | 1065-Lng-A-T | 99   | chr4:36364950-36365050 |
| chr4 | 36410850 | 36410950 | 1152-Lng-A-T | 51   | chr4:36410850-36410950 |
| chr4 | 36472750 | 36472850 | 1152-Lng-A-T | 47   | chr4:36472750-36472850 |
| chr4 | 36502750 | 36502850 | 1151-Lng-A-T | 54   | chr4:36502750-36502850 |
| chr4 | 36521250 | 36521350 | 1152-Lng-A-T | 133  | chr4:36521250-36521350 |
| chr4 | 36547150 | 36547250 | 1072-Lng-A-T | 72   | chr4:36547150-36547250 |
| chr4 | 36570550 | 36570650 | 1223-Lng-C-T | 52   | chr4:36570550-36570650 |
| chr4 | 36673950 | 36674050 | 1004-Lng-A-T | 111  | chr4:36673950-36674050 |
| chr4 | 36702550 | 36702650 | 1152-Lng-A-T | 161  | chr4:36702550-36702650 |
| chr4 | 36705650 | 36705750 | 1167-Lng-A-T | 122  | chr4:36705650-36705750 |
| chr4 | 36727650 | 36727750 | 1274-Lng-A-T | 52   | chr4:36727650-36727750 |
| chr4 | 36815350 | 36815450 | 1065-Lng-C-T | 83   | chr4:36815350-36815450 |

**Table S2: SB Insertion regions**

|      |          |          |              |     |                        |
|------|----------|----------|--------------|-----|------------------------|
| chr4 | 36901750 | 36901850 | 1100-Lng-A-T | 53  | chr4:36901750-36901850 |
| chr4 | 36937150 | 36937250 | 1004-Lng-A-T | 63  | chr4:36937150-36937250 |
| chr4 | 37378250 | 37378350 | 1223-Lng-A-T | 67  | chr4:37378250-37378350 |
| chr4 | 37525950 | 37526050 | 1065-Lng-C-T | 84  | chr4:37525950-37526050 |
| chr4 | 37698150 | 37698250 | 1274-Lng-A-T | 136 | chr4:37698150-37698250 |
| chr4 | 37753250 | 37753350 | 846-Lng-A-T  | 79  | chr4:37753250-37753350 |
| chr4 | 37838050 | 37838150 | 1065-Lng-B-T | 50  | chr4:37838050-37838150 |
| chr4 | 37898750 | 37898850 | 1152-Lng-A-T | 70  | chr4:37898750-37898850 |
| chr4 | 37954550 | 37954650 | 1065-Lng-C-T | 148 | chr4:37954550-37954650 |
| chr4 | 38395150 | 38395250 | 1090-Lng-A-T | 86  | chr4:38395150-38395250 |
| chr4 | 38440850 | 38440950 | 1072-Lng-A-T | 219 | chr4:38440850-38440950 |
| chr4 | 38607050 | 38607150 | 1065-Lng-A-T | 44  | chr4:38607050-38607150 |
| chr4 | 38615050 | 38615150 | 1100-Lng-A-T | 64  | chr4:38615050-38615150 |
| chr4 | 39248050 | 39248150 | 1223-Lng-C-T | 46  | chr4:39248050-39248150 |
| chr4 | 39422650 | 39422750 | 1065-Lng-C-T | 88  | chr4:39422650-39422750 |
| chr4 | 39424550 | 39424650 | 1188-Lng-A-T | 46  | chr4:39424550-39424650 |
| chr4 | 39440450 | 39440550 | 1065-Lng-C-T | 321 | chr4:39440450-39440550 |
| chr4 | 39549750 | 39549850 | 901-Lng-B-T  | 98  | chr4:39549750-39549850 |
| chr4 | 39559850 | 39559950 | 1274-Lng-A-T | 49  | chr4:39559850-39559950 |
| chr4 | 39661450 | 39661550 | 1065-Lng-A-T | 71  | chr4:39661450-39661550 |
| chr4 | 39717750 | 39717850 | 1065-Lng-C-T | 92  | chr4:39717750-39717850 |
| chr4 | 39745250 | 39745350 | 1152-Lng-A-T | 41  | chr4:39745250-39745350 |
| chr4 | 40117150 | 40117250 | 1274-Lng-A-T | 134 | chr4:40117150-40117250 |
| chr4 | 40125450 | 40125550 | 901-Lng-A-T  | 82  | chr4:40125450-40125550 |
| chr4 | 40159750 | 40159850 | 1065-Lng-C-T | 140 | chr4:40159750-40159850 |
| chr4 | 40617350 | 40617450 | 1004-Lng-A-T | 51  | chr4:40617350-40617450 |
| chr4 | 40673250 | 40673350 | 1100-Lng-A-T | 79  | chr4:40673250-40673350 |
| chr4 | 40701850 | 40701950 | 1100-Lng-A-T | 75  | chr4:40701850-40701950 |
| chr4 | 40731850 | 40731950 | 1274-Lng-A-T | 80  | chr4:40731850-40731950 |
| chr4 | 40773250 | 40773350 | 1152-Lng-A-T | 53  | chr4:40773250-40773350 |
| chr4 | 40789650 | 40789750 | 1152-Lng-A-T | 72  | chr4:40789650-40789750 |
| chr4 | 40805550 | 40805650 | 1100-Lng-A-T | 343 | chr4:40805550-40805650 |
| chr4 | 40945250 | 40945350 | 1274-Lng-A-T | 53  | chr4:40945250-40945350 |
| chr4 | 41061450 | 41061550 | 1100-Lng-A-T | 74  | chr4:41061450-41061550 |
| chr4 | 41081650 | 41081750 | 1223-Lng-D-T | 48  | chr4:41081650-41081750 |
| chr4 | 41087750 | 41087850 | 1065-Lng-C-T | 81  | chr4:41087750-41087850 |
| chr4 | 41093750 | 41093850 | 901-Lng-A-T  | 84  | chr4:41093750-41093850 |
| chr4 | 41106350 | 41106450 | 1100-Lng-A-T | 55  | chr4:41106350-41106450 |
| chr4 | 41111750 | 41111850 | 1274-Lng-A-T | 173 | chr4:41111750-41111850 |
| chr4 | 41173850 | 41173950 | 901-Lng-C-T  | 182 | chr4:41173850-41173950 |
| chr4 | 41203750 | 41203850 | 1274-Lng-A-T | 61  | chr4:41203750-41203850 |
| chr4 | 41203750 | 41203850 | 1188-Lng-A-T | 54  | chr4:41203750-41203850 |
| chr4 | 41223550 | 41223650 | 1065-Lng-A-T | 330 | chr4:41223550-41223650 |
| chr4 | 41281050 | 41281150 | 1065-Lng-B-T | 45  | chr4:41281050-41281150 |
| chr4 | 41305950 | 41306050 | 1065-Lng-A-T | 60  | chr4:41305950-41306050 |
| chr4 | 41330550 | 41330650 | 1223-Lng-B-T | 251 | chr4:41330550-41330650 |

**Table S2: SB Insertion regions**

|      |          |          |              |      |                        |
|------|----------|----------|--------------|------|------------------------|
| chr4 | 41490750 | 41490850 | 1065-Lng-C-T | 75   | chr4:41490750-41490850 |
| chr4 | 42948850 | 42948950 | 1100-Lng-A-T | 104  | chr4:42948850-42948950 |
| chr4 | 43005750 | 43005850 | 1090-Lng-A-T | 56   | chr4:43005750-43005850 |
| chr4 | 43021350 | 43021450 | 1100-Lng-A-T | 119  | chr4:43021350-43021450 |
| chr4 | 43074950 | 43075050 | 1100-Lng-A-T | 523  | chr4:43074950-43075050 |
| chr4 | 43118250 | 43118350 | 1100-Lng-A-T | 214  | chr4:43118250-43118350 |
| chr4 | 43132550 | 43132650 | 1274-Lng-A-T | 53   | chr4:43132550-43132650 |
| chr4 | 43172950 | 43173050 | 1100-Lng-A-T | 64   | chr4:43172950-43173050 |
| chr4 | 43206450 | 43206550 | 1167-Lng-A-T | 58   | chr4:43206450-43206550 |
| chr4 | 43267550 | 43267650 | 1090-Lng-A-T | 94   | chr4:43267550-43267650 |
| chr4 | 43286650 | 43286750 | 1100-Lng-A-T | 129  | chr4:43286650-43286750 |
| chr4 | 43289550 | 43289650 | 1223-Lng-B-T | 35   | chr4:43289550-43289650 |
| chr4 | 43303650 | 43303750 | 1100-Lng-A-T | 111  | chr4:43303650-43303750 |
| chr4 | 43306050 | 43306150 | 1100-Lng-A-T | 493  | chr4:43306050-43306150 |
| chr4 | 43307750 | 43307850 | 1100-Lng-A-T | 73   | chr4:43307750-43307850 |
| chr4 | 43385350 | 43385450 | 1100-Lng-A-T | 53   | chr4:43385350-43385450 |
| chr4 | 43408550 | 43408650 | 1090-Lng-B-T | 124  | chr4:43408550-43408650 |
| chr4 | 43424050 | 43424150 | 1223-Lng-D-T | 44   | chr4:43424050-43424150 |
| chr4 | 43571150 | 43571250 | 901-Lng-D-T  | 350  | chr4:43571150-43571250 |
| chr4 | 43762550 | 43762650 | 1152-Lng-A-T | 39   | chr4:43762550-43762650 |
| chr4 | 43810550 | 43810650 | 1065-Lng-B-T | 69   | chr4:43810550-43810650 |
| chr4 | 43875250 | 43875350 | 1274-Lng-A-T | 144  | chr4:43875250-43875350 |
| chr4 | 43913650 | 43913750 | 1223-Lng-D-T | 48   | chr4:43913650-43913750 |
| chr4 | 43914850 | 43914950 | 1100-Lng-A-T | 70   | chr4:43914850-43914950 |
| chr4 | 43963250 | 43963350 | 1274-Lng-A-T | 67   | chr4:43963250-43963350 |
| chr4 | 43983650 | 43983750 | 1274-Lng-A-T | 72   | chr4:43983650-43983750 |
| chr4 | 44140350 | 44140450 | 901-Lng-C-T  | 64   | chr4:44140350-44140450 |
| chr4 | 44212350 | 44212450 | 1152-Lng-A-T | 67   | chr4:44212350-44212450 |
| chr4 | 44215050 | 44215150 | 1188-Lng-A-T | 238  | chr4:44215050-44215150 |
| chr4 | 44263050 | 44263150 | 1065-Lng-C-T | 184  | chr4:44263050-44263150 |
| chr4 | 44331350 | 44331450 | 901-Lng-B-T  | 271  | chr4:44331350-44331450 |
| chr4 | 44773350 | 44773450 | 901-Lng-B-T  | 237  | chr4:44773350-44773450 |
| chr4 | 44836350 | 44836450 | 1004-Lng-A-T | 129  | chr4:44836350-44836450 |
| chr4 | 44884650 | 44884750 | 1188-Lng-A-T | 84   | chr4:44884650-44884750 |
| chr4 | 44890350 | 44890450 | 1065-Lng-B-T | 65   | chr4:44890350-44890450 |
| chr4 | 45008650 | 45008750 | 1065-Lng-B-T | 54   | chr4:45008650-45008750 |
| chr4 | 45011150 | 45011250 | 901-Lng-C-T  | 64   | chr4:45011150-45011250 |
| chr4 | 45244450 | 45244550 | 1072-Lng-A-T | 55   | chr4:45244450-45244550 |
| chr4 | 45276450 | 45276550 | 1167-Lng-A-T | 77   | chr4:45276450-45276550 |
| chr4 | 45330250 | 45330350 | 1151-Lng-A-T | 250  | chr4:45330250-45330350 |
| chr4 | 45358550 | 45358650 | 1223-Lng-D-T | 40   | chr4:45358550-45358650 |
| chr4 | 45365050 | 45365150 | 1090-Lng-B-T | 981  | chr4:45365050-45365150 |
| chr4 | 45377150 | 45377250 | 1188-Lng-A-T | 1016 | chr4:45377150-45377250 |
| chr4 | 45481950 | 45482050 | 1152-Lng-A-T | 98   | chr4:45481950-45482050 |
| chr4 | 45504550 | 45504650 | 1274-Lng-A-T | 60   | chr4:45504550-45504650 |
| chr4 | 45513550 | 45513650 | 1100-Lng-A-T | 61   | chr4:45513550-45513650 |

**Table S2: SB Insertion regions**

|      |          |          |              |     |                        |
|------|----------|----------|--------------|-----|------------------------|
| chr4 | 45514450 | 45514550 | 901-Lng-B-T  | 36  | chr4:45514450-45514550 |
| chr4 | 45515750 | 45515850 | 1004-Lng-A-T | 68  | chr4:45515750-45515850 |
| chr4 | 45521350 | 45521450 | 901-Lng-B-T  | 37  | chr4:45521350-45521450 |
| chr4 | 45565350 | 45565450 | 1223-Lng-C-T | 93  | chr4:45565350-45565450 |
| chr4 | 45660150 | 45660250 | 1090-Lng-B-T | 191 | chr4:45660150-45660250 |
| chr4 | 45797950 | 45798050 | 1167-Lng-A-T | 94  | chr4:45797950-45798050 |
| chr4 | 46006350 | 46006450 | 1152-Lng-A-T | 156 | chr4:46006350-46006450 |
| chr4 | 46026550 | 46026650 | 1223-Lng-D-T | 155 | chr4:46026550-46026650 |
| chr4 | 46150250 | 46150350 | 901-Lng-C-T  | 77  | chr4:46150250-46150350 |
| chr4 | 46176950 | 46177050 | 1100-Lng-A-T | 94  | chr4:46176950-46177050 |
| chr4 | 46319350 | 46319450 | 1274-Lng-A-T | 102 | chr4:46319350-46319450 |
| chr4 | 46419850 | 46419950 | 1274-Lng-A-T | 118 | chr4:46419850-46419950 |
| chr4 | 46468250 | 46468350 | 1100-Lng-A-T | 54  | chr4:46468250-46468350 |
| chr4 | 46929250 | 46929350 | 901-Lng-A-T  | 185 | chr4:46929250-46929350 |
| chr4 | 47077350 | 47077450 | 1223-Lng-D-T | 59  | chr4:47077350-47077450 |
| chr4 | 47117450 | 47117550 | 901-Lng-D-T  | 155 | chr4:47117450-47117550 |
| chr4 | 47375150 | 47375250 | 901-Lng-B-T  | 172 | chr4:47375150-47375250 |
| chr4 | 47395850 | 47395950 | 1274-Lng-A-T | 87  | chr4:47395850-47395950 |
| chr4 | 47414850 | 47414950 | 1188-Lng-A-T | 166 | chr4:47414850-47414950 |
| chr4 | 47422150 | 47422250 | 1151-Lng-A-T | 62  | chr4:47422150-47422250 |
| chr4 | 47627550 | 47627650 | 1223-Lng-A-T | 68  | chr4:47627550-47627650 |
| chr4 | 47685450 | 47685550 | 1274-Lng-A-T | 55  | chr4:47685450-47685550 |
| chr4 | 47792550 | 47792650 | 1072-Lng-A-T | 105 | chr4:47792550-47792650 |
| chr4 | 47868950 | 47869050 | 1004-Lng-A-T | 71  | chr4:47868950-47869050 |
| chr4 | 47945050 | 47945150 | 1223-Lng-B-T | 144 | chr4:47945050-47945150 |
| chr4 | 48159650 | 48159750 | 1152-Lng-A-T | 68  | chr4:48159650-48159750 |
| chr4 | 48211850 | 48211950 | 1188-Lng-A-T | 41  | chr4:48211850-48211950 |
| chr4 | 48219150 | 48219250 | 1274-Lng-A-T | 73  | chr4:48219150-48219250 |
| chr4 | 48229750 | 48229850 | 901-Lng-D-T  | 108 | chr4:48229750-48229850 |
| chr4 | 48232650 | 48232750 | 901-Lng-C-T  | 211 | chr4:48232650-48232750 |
| chr4 | 48232650 | 48232750 | 1152-Lng-A-T | 360 | chr4:48232650-48232750 |
| chr4 | 48257750 | 48257850 | 1152-Lng-A-T | 121 | chr4:48257750-48257850 |
| chr4 | 48276450 | 48276550 | 1100-Lng-A-T | 149 | chr4:48276450-48276550 |
| chr4 | 48431850 | 48431950 | 1090-Lng-A-T | 117 | chr4:48431850-48431950 |
| chr4 | 48476050 | 48476150 | 1274-Lng-A-T | 98  | chr4:48476050-48476150 |
| chr4 | 48479150 | 48479250 | 1100-Lng-A-T | 286 | chr4:48479150-48479250 |
| chr4 | 48486850 | 48486950 | 1274-Lng-A-T | 106 | chr4:48486850-48486950 |
| chr4 | 48712550 | 48712650 | 901-Lng-B-T  | 80  | chr4:48712550-48712650 |
| chr4 | 48783250 | 48783350 | 846-Lng-A-T  | 54  | chr4:48783250-48783350 |
| chr4 | 48793650 | 48793750 | 901-Lng-B-T  | 114 | chr4:48793650-48793750 |
| chr4 | 49039750 | 49039850 | 1065-Lng-B-T | 77  | chr4:49039750-49039850 |
| chr4 | 49268750 | 49268850 | 1223-Lng-D-T | 41  | chr4:49268750-49268850 |
| chr4 | 49572150 | 49572250 | 1065-Lng-B-T | 83  | chr4:49572150-49572250 |
| chr4 | 49647650 | 49647750 | 1167-Lng-A-T | 61  | chr4:49647650-49647750 |
| chr4 | 49651950 | 49652050 | 1274-Lng-A-T | 57  | chr4:49651950-49652050 |
| chr4 | 49663250 | 49663350 | 1004-Lng-A-T | 54  | chr4:49663250-49663350 |



**Table S2: SB Insertion regions**

|      |          |          |              |     |                        |
|------|----------|----------|--------------|-----|------------------------|
| chr4 | 49668550 | 49668650 | 1167-Lng-A-T | 57  | chr4:49668550-49668650 |
| chr4 | 49676950 | 49677050 | 1167-Lng-A-T | 127 | chr4:49676950-49677050 |
| chr4 | 49764650 | 49764750 | 1223-Lng-D-T | 42  | chr4:49764650-49764750 |
| chr4 | 49842450 | 49842550 | 901-Lng-C-T  | 84  | chr4:49842450-49842550 |
| chr4 | 49863750 | 49863850 | 1100-Lng-A-T | 73  | chr4:49863750-49863850 |
| chr4 | 50120250 | 50120350 | 1004-Lng-A-T | 290 | chr4:50120250-50120350 |
| chr4 | 50120750 | 50120850 | 901-Lng-A-T  | 591 | chr4:50120750-50120850 |
| chr4 | 50324050 | 50324150 | 1274-Lng-A-T | 56  | chr4:50324050-50324150 |
| chr4 | 50386350 | 50386450 | 901-Lng-D-T  | 190 | chr4:50386350-50386450 |
| chr4 | 50426750 | 50426850 | 1100-Lng-A-T | 87  | chr4:50426750-50426850 |
| chr4 | 50539250 | 50539350 | 1072-Lng-A-T | 71  | chr4:50539250-50539350 |
| chr4 | 50690950 | 50691050 | 901-Lng-C-T  | 67  | chr4:50690950-50691050 |
| chr4 | 50863250 | 50863350 | 1090-Lng-A-T | 46  | chr4:50863250-50863350 |
| chr4 | 50996350 | 50996450 | 1223-Lng-B-T | 119 | chr4:50996350-50996450 |
| chr4 | 51020950 | 51021050 | 1152-Lng-A-T | 65  | chr4:51020950-51021050 |
| chr4 | 51040950 | 51041050 | 1167-Lng-A-T | 50  | chr4:51040950-51041050 |
| chr4 | 51132350 | 51132450 | 1004-Lng-A-T | 78  | chr4:51132350-51132450 |
| chr4 | 51202050 | 51202150 | 1223-Lng-B-T | 72  | chr4:51202050-51202150 |
| chr4 | 51230050 | 51230150 | 1223-Lng-D-T | 54  | chr4:51230050-51230150 |
| chr4 | 51367350 | 51367450 | 901-Lng-A-T  | 488 | chr4:51367350-51367450 |
| chr4 | 51449550 | 51449650 | 1152-Lng-A-T | 61  | chr4:51449550-51449650 |
| chr4 | 51584550 | 51584650 | 1152-Lng-A-T | 43  | chr4:51584550-51584650 |
| chr4 | 51659050 | 51659150 | 1072-Lng-A-T | 65  | chr4:51659050-51659150 |
| chr4 | 51983550 | 51983650 | 1065-Lng-A-T | 60  | chr4:51983550-51983650 |
| chr4 | 52108650 | 52108750 | 1065-Lng-A-T | 44  | chr4:52108650-52108750 |
| chr4 | 52116550 | 52116650 | 1065-Lng-B-T | 94  | chr4:52116550-52116650 |
| chr4 | 52303850 | 52303950 | 901-Lng-D-T  | 170 | chr4:52303850-52303950 |
| chr4 | 52470350 | 52470450 | 1004-Lng-A-T | 880 | chr4:52470350-52470450 |
| chr4 | 52542650 | 52542750 | 1152-Lng-A-T | 57  | chr4:52542650-52542750 |
| chr4 | 52545950 | 52546050 | 1100-Lng-A-T | 87  | chr4:52545950-52546050 |
| chr4 | 52838150 | 52838250 | 1090-Lng-B-T | 71  | chr4:52838150-52838250 |
| chr4 | 52943850 | 52943950 | 1065-Lng-B-T | 42  | chr4:52943850-52943950 |
| chr4 | 53094450 | 53094550 | 1274-Lng-A-T | 57  | chr4:53094450-53094550 |
| chr4 | 53538750 | 53538850 | 1223-Lng-B-T | 46  | chr4:53538750-53538850 |
| chr4 | 53540050 | 53540150 | 901-Lng-A-T  | 68  | chr4:53540050-53540150 |
| chr4 | 53572550 | 53572650 | 1223-Lng-D-T | 40  | chr4:53572550-53572650 |
| chr4 | 53591750 | 53591850 | 1090-Lng-A-T | 56  | chr4:53591750-53591850 |
| chr4 | 53662150 | 53662250 | 1004-Lng-A-T | 74  | chr4:53662150-53662250 |
| chr4 | 53667750 | 53667850 | 1100-Lng-A-T | 56  | chr4:53667750-53667850 |
| chr4 | 53672550 | 53672650 | 1223-Lng-C-T | 88  | chr4:53672550-53672650 |
| chr4 | 53858250 | 53858350 | 1152-Lng-A-T | 98  | chr4:53858250-53858350 |
| chr4 | 53971750 | 53971850 | 1223-Lng-A-T | 138 | chr4:53971750-53971850 |
| chr4 | 54299850 | 54299950 | 901-Lng-C-T  | 60  | chr4:54299850-54299950 |
| chr4 | 54394150 | 54394250 | 1065-Lng-A-T | 37  | chr4:54394150-54394250 |
| chr4 | 54497050 | 54497150 | 1065-Lng-A-T | 41  | chr4:54497050-54497150 |
| chr4 | 54592450 | 54592550 | 1223-Lng-A-T | 70  | chr4:54592450-54592550 |

**Table S2: SB Insertion regions**

|      |          |          |              |      |                        |
|------|----------|----------|--------------|------|------------------------|
| chr4 | 54705250 | 54705350 | 1151-Lng-A-T | 109  | chr4:54705250-54705350 |
| chr4 | 54735450 | 54735550 | 1223-Lng-B-T | 34   | chr4:54735450-54735550 |
| chr4 | 54775750 | 54775850 | 1274-Lng-A-T | 61   | chr4:54775750-54775850 |
| chr4 | 55059950 | 55060050 | 1223-Lng-D-T | 54   | chr4:55059950-55060050 |
| chr4 | 55196050 | 55196150 | 901-Lng-B-T  | 171  | chr4:55196050-55196150 |
| chr4 | 55339550 | 55339650 | 1100-Lng-A-T | 153  | chr4:55339550-55339650 |
| chr4 | 55380350 | 55380450 | 1274-Lng-A-T | 1779 | chr4:55380350-55380450 |
| chr4 | 55400650 | 55400750 | 901-Lng-A-T  | 93   | chr4:55400650-55400750 |
| chr4 | 55713750 | 55713850 | 1065-Lng-C-T | 75   | chr4:55713750-55713850 |
| chr4 | 55913350 | 55913450 | 1223-Lng-C-T | 51   | chr4:55913350-55913450 |
| chr4 | 55985050 | 55985150 | 1090-Lng-A-T | 67   | chr4:55985050-55985150 |
| chr4 | 56181850 | 56181950 | 1065-Lng-C-T | 106  | chr4:56181850-56181950 |
| chr4 | 56278150 | 56278250 | 1065-Lng-B-T | 44   | chr4:56278150-56278250 |
| chr4 | 56553050 | 56553150 | 1065-Lng-A-T | 73   | chr4:56553050-56553150 |
| chr4 | 56776550 | 56776650 | 1152-Lng-A-T | 64   | chr4:56776550-56776650 |
| chr4 | 56812650 | 56812750 | 1065-Lng-A-T | 81   | chr4:56812650-56812750 |
| chr4 | 56831050 | 56831150 | 1151-Lng-A-T | 98   | chr4:56831050-56831150 |
| chr4 | 56862650 | 56862750 | 1100-Lng-A-T | 134  | chr4:56862650-56862750 |
| chr4 | 56893650 | 56893750 | 1274-Lng-A-T | 85   | chr4:56893650-56893750 |
| chr4 | 56902150 | 56902250 | 1274-Lng-A-T | 59   | chr4:56902150-56902250 |
| chr4 | 56903850 | 56903950 | 1100-Lng-A-T | 55   | chr4:56903850-56903950 |
| chr4 | 56906050 | 56906150 | 1100-Lng-A-T | 97   | chr4:56906050-56906150 |
| chr4 | 56930650 | 56930750 | 1223-Lng-A-T | 51   | chr4:56930650-56930750 |
| chr4 | 57140450 | 57140550 | 1152-Lng-A-T | 90   | chr4:57140450-57140550 |
| chr4 | 57144250 | 57144350 | 1152-Lng-A-T | 45   | chr4:57144250-57144350 |
| chr4 | 57204350 | 57204450 | 1090-Lng-A-T | 87   | chr4:57204350-57204450 |
| chr4 | 57222050 | 57222150 | 1065-Lng-C-T | 73   | chr4:57222050-57222150 |
| chr4 | 57243950 | 57244050 | 1065-Lng-C-T | 67   | chr4:57243950-57244050 |
| chr4 | 57250250 | 57250350 | 1188-Lng-A-T | 38   | chr4:57250250-57250350 |
| chr4 | 57257550 | 57257650 | 1152-Lng-A-T | 126  | chr4:57257550-57257650 |
| chr4 | 57259650 | 57259750 | 1274-Lng-A-T | 148  | chr4:57259650-57259750 |
| chr4 | 57284450 | 57284550 | 1167-Lng-A-T | 50   | chr4:57284450-57284550 |
| chr4 | 57313750 | 57313850 | 1223-Lng-A-T | 117  | chr4:57313750-57313850 |
| chr4 | 57350550 | 57350650 | 1152-Lng-A-T | 107  | chr4:57350550-57350650 |
| chr4 | 57361350 | 57361450 | 1188-Lng-A-T | 175  | chr4:57361350-57361450 |
| chr4 | 57508950 | 57509050 | 1167-Lng-A-T | 54   | chr4:57508950-57509050 |
| chr4 | 57567550 | 57567650 | 1090-Lng-B-T | 112  | chr4:57567550-57567650 |
| chr4 | 57735950 | 57736050 | 1090-Lng-B-T | 249  | chr4:57735950-57736050 |
| chr4 | 57875950 | 57876050 | 1223-Lng-A-T | 53   | chr4:57875950-57876050 |
| chr4 | 57876050 | 57876150 | 1223-Lng-A-T | 312  | chr4:57876050-57876150 |
| chr4 | 57958450 | 57958550 | 1065-Lng-B-T | 45   | chr4:57958450-57958550 |
| chr4 | 57960250 | 57960350 | 1188-Lng-A-T | 285  | chr4:57960250-57960350 |
| chr4 | 58493550 | 58493650 | 1151-Lng-A-T | 142  | chr4:58493550-58493650 |
| chr4 | 58811650 | 58811750 | 901-Lng-A-T  | 86   | chr4:58811650-58811750 |
| chr4 | 58821350 | 58821450 | 1152-Lng-A-T | 115  | chr4:58821350-58821450 |
| chr4 | 58833250 | 58833350 | 1188-Lng-A-T | 177  | chr4:58833250-58833350 |

**Table S2: SB Insertion regions**

|      |          |          |              |     |                        |
|------|----------|----------|--------------|-----|------------------------|
| chr4 | 58860550 | 58860650 | 1100-Lng-A-T | 56  | chr4:58860550-58860650 |
| chr4 | 58875450 | 58875550 | 1223-Lng-C-T | 83  | chr4:58875450-58875550 |
| chr4 | 58884650 | 58884750 | 1152-Lng-A-T | 53  | chr4:58884650-58884750 |
| chr4 | 58900250 | 58900350 | 1100-Lng-A-T | 57  | chr4:58900250-58900350 |
| chr4 | 58905250 | 58905350 | 901-Lng-A-T  | 53  | chr4:58905250-58905350 |
| chr4 | 58906950 | 58907050 | 1065-Lng-C-T | 78  | chr4:58906950-58907050 |
| chr4 | 58913850 | 58913950 | 1151-Lng-A-T | 602 | chr4:58913850-58913950 |
| chr4 | 58914450 | 58914550 | 1100-Lng-A-T | 56  | chr4:58914450-58914550 |
| chr4 | 58921750 | 58921850 | 1100-Lng-A-T | 249 | chr4:58921750-58921850 |
| chr4 | 58994250 | 58994350 | 1100-Lng-A-T | 57  | chr4:58994250-58994350 |
| chr4 | 59008350 | 59008450 | 1072-Lng-A-T | 113 | chr4:59008350-59008450 |
| chr4 | 59021950 | 59022050 | 1100-Lng-A-T | 67  | chr4:59021950-59022050 |
| chr4 | 59048550 | 59048650 | 901-Lng-A-T  | 112 | chr4:59048550-59048650 |
| chr4 | 59403850 | 59403950 | 901-Lng-B-T  | 56  | chr4:59403850-59403950 |
| chr4 | 59496850 | 59496950 | 1100-Lng-A-T | 370 | chr4:59496850-59496950 |
| chr4 | 59501450 | 59501550 | 1223-Lng-C-T | 52  | chr4:59501450-59501550 |
| chr4 | 59504750 | 59504850 | 1090-Lng-A-T | 61  | chr4:59504750-59504850 |
| chr4 | 59540750 | 59540850 | 901-Lng-C-T  | 34  | chr4:59540750-59540850 |
| chr4 | 59549450 | 59549550 | 1065-Lng-C-T | 70  | chr4:59549450-59549550 |
| chr4 | 59645750 | 59645850 | 1100-Lng-A-T | 114 | chr4:59645750-59645850 |
| chr4 | 59672850 | 59672950 | 1072-Lng-A-T | 147 | chr4:59672850-59672950 |
| chr4 | 59701750 | 59701850 | 1065-Lng-A-T | 43  | chr4:59701750-59701850 |
| chr4 | 59742150 | 59742250 | 1004-Lng-A-T | 135 | chr4:59742150-59742250 |
| chr4 | 59766850 | 59766950 | 1223-Lng-A-T | 398 | chr4:59766850-59766950 |
| chr4 | 59812950 | 59813050 | 1072-Lng-A-T | 155 | chr4:59812950-59813050 |
| chr4 | 59821650 | 59821750 | 901-Lng-C-T  | 50  | chr4:59821650-59821750 |
| chr4 | 59844950 | 59845050 | 1274-Lng-A-T | 178 | chr4:59844950-59845050 |
| chr4 | 59877950 | 59878050 | 1072-Lng-A-T | 74  | chr4:59877950-59878050 |
| chr4 | 61229150 | 61229250 | 1004-Lng-A-T | 243 | chr4:61229150-61229250 |
| chr4 | 61471050 | 61471150 | 1100-Lng-A-T | 88  | chr4:61471050-61471150 |
| chr4 | 61959150 | 61959250 | 1072-Lng-A-T | 193 | chr4:61959150-61959250 |
| chr4 | 61985850 | 61985950 | 1065-Lng-B-T | 72  | chr4:61985850-61985950 |
| chr4 | 62005150 | 62005250 | 1065-Lng-B-T | 103 | chr4:62005150-62005250 |
| chr4 | 62057850 | 62057950 | 1151-Lng-A-T | 59  | chr4:62057850-62057950 |
| chr4 | 62144450 | 62144550 | 1152-Lng-A-T | 391 | chr4:62144450-62144550 |
| chr4 | 62156350 | 62156450 | 1100-Lng-A-T | 69  | chr4:62156350-62156450 |
| chr4 | 62353150 | 62353250 | 1090-Lng-A-T | 44  | chr4:62353150-62353250 |
| chr4 | 62641150 | 62641250 | 1065-Lng-B-T | 44  | chr4:62641150-62641250 |
| chr4 | 62681250 | 62681350 | 1072-Lng-A-T | 62  | chr4:62681250-62681350 |
| chr4 | 62749850 | 62749950 | 1100-Lng-A-T | 111 | chr4:62749850-62749950 |
| chr4 | 62975350 | 62975450 | 1065-Lng-A-T | 39  | chr4:62975350-62975450 |
| chr4 | 63022750 | 63022850 | 901-Lng-C-T  | 258 | chr4:63022750-63022850 |
| chr4 | 63034850 | 63034950 | 1100-Lng-A-T | 74  | chr4:63034850-63034950 |
| chr4 | 63162950 | 63163050 | 1065-Lng-A-T | 43  | chr4:63162950-63163050 |
| chr4 | 63175350 | 63175450 | 1223-Lng-D-T | 48  | chr4:63175350-63175450 |
| chr4 | 63210550 | 63210650 | 1167-Lng-A-T | 99  | chr4:63210550-63210650 |

**Table S2: SB Insertion regions**

|      |          |          |              |     |                        |
|------|----------|----------|--------------|-----|------------------------|
| chr4 | 63226350 | 63226450 | 901-Lng-A-T  | 268 | chr4:63226350-63226450 |
| chr4 | 63409150 | 63409250 | 1223-Lng-B-T | 43  | chr4:63409150-63409250 |
| chr4 | 63441350 | 63441450 | 846-Lng-A-T  | 176 | chr4:63441350-63441450 |
| chr4 | 63510550 | 63510650 | 1223-Lng-D-T | 41  | chr4:63510550-63510650 |
| chr4 | 63604850 | 63604950 | 1223-Lng-A-T | 236 | chr4:63604850-63604950 |
| chr4 | 63795850 | 63795950 | 1223-Lng-C-T | 52  | chr4:63795850-63795950 |
| chr4 | 63848350 | 63848450 | 901-Lng-C-T  | 44  | chr4:63848350-63848450 |
| chr4 | 64057750 | 64057850 | 1004-Lng-A-T | 72  | chr4:64057750-64057850 |
| chr4 | 65040550 | 65040650 | 1004-Lng-A-T | 121 | chr4:65040550-65040650 |
| chr4 | 65066050 | 65066150 | 1100-Lng-A-T | 68  | chr4:65066050-65066150 |
| chr4 | 65435450 | 65435550 | 1004-Lng-A-T | 65  | chr4:65435450-65435550 |
| chr4 | 65507050 | 65507150 | 1152-Lng-A-T | 32  | chr4:65507050-65507150 |
| chr4 | 65894750 | 65894850 | 1065-Lng-B-T | 51  | chr4:65894750-65894850 |
| chr4 | 65925650 | 65925750 | 1065-Lng-A-T | 71  | chr4:65925650-65925750 |
| chr4 | 65956850 | 65956950 | 1004-Lng-A-T | 197 | chr4:65956850-65956950 |
| chr4 | 66013650 | 66013750 | 1090-Lng-A-T | 77  | chr4:66013650-66013750 |
| chr4 | 66089250 | 66089350 | 1100-Lng-A-T | 76  | chr4:66089250-66089350 |
| chr4 | 66161950 | 66162050 | 1065-Lng-B-T | 48  | chr4:66161950-66162050 |
| chr4 | 66189450 | 66189550 | 1100-Lng-A-T | 91  | chr4:66189450-66189550 |
| chr4 | 66237750 | 66237850 | 846-Lng-A-T  | 106 | chr4:66237750-66237850 |
| chr4 | 66266550 | 66266650 | 901-Lng-A-T  | 494 | chr4:66266550-66266650 |
| chr4 | 66556550 | 66556650 | 901-Lng-C-T  | 41  | chr4:66556550-66556650 |
| chr4 | 66662050 | 66662150 | 1167-Lng-A-T | 69  | chr4:66662050-66662150 |
| chr4 | 66813350 | 66813450 | 1072-Lng-A-T | 79  | chr4:66813350-66813450 |
| chr4 | 66843650 | 66843750 | 901-Lng-D-T  | 324 | chr4:66843650-66843750 |
| chr4 | 66924350 | 66924450 | 1151-Lng-A-T | 95  | chr4:66924350-66924450 |
| chr4 | 67061450 | 67061550 | 1223-Lng-B-T | 39  | chr4:67061450-67061550 |
| chr4 | 67101250 | 67101350 | 901-Lng-C-T  | 194 | chr4:67101250-67101350 |
| chr4 | 67122050 | 67122150 | 1152-Lng-A-T | 60  | chr4:67122050-67122150 |
| chr4 | 67194850 | 67194950 | 901-Lng-C-T  | 43  | chr4:67194850-67194950 |
| chr4 | 67278350 | 67278450 | 1152-Lng-A-T | 150 | chr4:67278350-67278450 |
| chr4 | 67355650 | 67355750 | 1151-Lng-A-T | 61  | chr4:67355650-67355750 |
| chr4 | 67398350 | 67398450 | 1065-Lng-C-T | 70  | chr4:67398350-67398450 |
| chr4 | 67446150 | 67446250 | 901-Lng-D-T  | 246 | chr4:67446150-67446250 |
| chr4 | 67447650 | 67447750 | 1065-Lng-B-T | 69  | chr4:67447650-67447750 |
| chr4 | 67483350 | 67483450 | 1188-Lng-A-T | 86  | chr4:67483350-67483450 |
| chr4 | 67547350 | 67547450 | 901-Lng-C-T  | 120 | chr4:67547350-67547450 |
| chr4 | 67555150 | 67555250 | 1072-Lng-A-T | 242 | chr4:67555150-67555250 |
| chr4 | 67732150 | 67732250 | 1152-Lng-A-T | 47  | chr4:67732150-67732250 |
| chr4 | 67748750 | 67748850 | 1274-Lng-A-T | 81  | chr4:67748750-67748850 |
| chr4 | 67751750 | 67751850 | 1100-Lng-A-T | 73  | chr4:67751750-67751850 |
| chr4 | 67817750 | 67817850 | 1167-Lng-A-T | 83  | chr4:67817750-67817850 |
| chr4 | 67882050 | 67882150 | 1274-Lng-A-T | 63  | chr4:67882050-67882150 |
| chr4 | 67917950 | 67918050 | 1065-Lng-A-T | 96  | chr4:67917950-67918050 |
| chr4 | 68013650 | 68013750 | 901-Lng-D-T  | 364 | chr4:68013650-68013750 |
| chr4 | 68045750 | 68045850 | 1167-Lng-A-T | 62  | chr4:68045750-68045850 |

**Table S2: SB Insertion regions**

|      |          |          |              |      |                        |
|------|----------|----------|--------------|------|------------------------|
| chr4 | 68143150 | 68143250 | 901-Lng-A-T  | 81   | chr4:68143150-68143250 |
| chr4 | 68238850 | 68238950 | 1152-Lng-A-T | 70   | chr4:68238850-68238950 |
| chr4 | 68527050 | 68527150 | 1100-Lng-A-T | 60   | chr4:68527050-68527150 |
| chr4 | 68763450 | 68763550 | 1223-Lng-B-T | 76   | chr4:68763450-68763550 |
| chr4 | 68863950 | 68864050 | 1152-Lng-A-T | 209  | chr4:68863950-68864050 |
| chr4 | 68913550 | 68913650 | 1274-Lng-A-T | 208  | chr4:68913550-68913650 |
| chr4 | 69188950 | 69189050 | 1274-Lng-A-T | 56   | chr4:69188950-69189050 |
| chr4 | 69703050 | 69703150 | 1065-Lng-A-T | 52   | chr4:69703050-69703150 |
| chr4 | 69897550 | 69897650 | 1065-Lng-C-T | 76   | chr4:69897550-69897650 |
| chr4 | 69946450 | 69946550 | 901-Lng-A-T  | 495  | chr4:69946450-69946550 |
| chr4 | 70039150 | 70039250 | 1065-Lng-A-T | 61   | chr4:70039150-70039250 |
| chr4 | 70039150 | 70039250 | 1090-Lng-A-T | 56   | chr4:70039150-70039250 |
| chr4 | 70039250 | 70039350 | 1167-Lng-A-T | 45   | chr4:70039250-70039350 |
| chr4 | 70101650 | 70101750 | 1223-Lng-C-T | 44   | chr4:70101650-70101750 |
| chr4 | 70112150 | 70112250 | 1100-Lng-A-T | 84   | chr4:70112150-70112250 |
| chr4 | 70149950 | 70150050 | 901-Lng-C-T  | 48   | chr4:70149950-70150050 |
| chr4 | 70155250 | 70155350 | 1065-Lng-A-T | 84   | chr4:70155250-70155350 |
| chr4 | 70165450 | 70165550 | 1090-Lng-A-T | 55   | chr4:70165450-70165550 |
| chr4 | 70168450 | 70168550 | 1274-Lng-A-T | 64   | chr4:70168450-70168550 |
| chr4 | 70180450 | 70180550 | 1100-Lng-B-T | 7811 | chr4:70180450-70180550 |
| chr4 | 70205250 | 70205350 | 1100-Lng-A-T | 53   | chr4:70205250-70205350 |
| chr4 | 70370850 | 70370950 | 1100-Lng-A-T | 146  | chr4:70370850-70370950 |
| chr4 | 70463250 | 70463350 | 901-Lng-C-T  | 50   | chr4:70463250-70463350 |
| chr4 | 70658650 | 70658750 | 1152-Lng-A-T | 61   | chr4:70658650-70658750 |
| chr4 | 70683550 | 70683650 | 1274-Lng-A-T | 93   | chr4:70683550-70683650 |
| chr4 | 70809650 | 70809750 | 1100-Lng-A-T | 179  | chr4:70809650-70809750 |
| chr4 | 70856950 | 70857050 | 1151-Lng-A-T | 62   | chr4:70856950-70857050 |
| chr4 | 70916650 | 70916750 | 901-Lng-A-T  | 77   | chr4:70916650-70916750 |
| chr4 | 71001850 | 71001950 | 1152-Lng-A-T | 40   | chr4:71001850-71001950 |
| chr4 | 71197850 | 71197950 | 1152-Lng-A-T | 58   | chr4:71197850-71197950 |
| chr4 | 71425250 | 71425350 | 1223-Lng-B-T | 144  | chr4:71425250-71425350 |
| chr4 | 71811350 | 71811450 | 1100-Lng-A-T | 55   | chr4:71811350-71811450 |
| chr4 | 71813950 | 71814050 | 1274-Lng-A-T | 55   | chr4:71813950-71814050 |
| chr4 | 71834650 | 71834750 | 1274-Lng-A-T | 113  | chr4:71834650-71834750 |
| chr4 | 71837150 | 71837250 | 1100-Lng-A-T | 62   | chr4:71837150-71837250 |
| chr4 | 71846950 | 71847050 | 1274-Lng-A-T | 68   | chr4:71846950-71847050 |
| chr4 | 71847250 | 71847350 | 1065-Lng-A-T | 77   | chr4:71847250-71847350 |
| chr4 | 71851950 | 71852050 | 1100-Lng-A-T | 1699 | chr4:71851950-71852050 |
| chr4 | 71879550 | 71879650 | 1223-Lng-D-T | 446  | chr4:71879550-71879650 |
| chr4 | 71902150 | 71902250 | 1065-Lng-B-T | 50   | chr4:71902150-71902250 |
| chr4 | 72145450 | 72145550 | 1090-Lng-A-T | 680  | chr4:72145450-72145550 |
| chr4 | 72188150 | 72188250 | 1223-Lng-D-T | 45   | chr4:72188150-72188250 |
| chr4 | 72217250 | 72217350 | 901-Lng-B-T  | 194  | chr4:72217250-72217350 |
| chr4 | 72423350 | 72423450 | 1090-Lng-A-T | 103  | chr4:72423350-72423450 |
| chr4 | 72640950 | 72641050 | 1100-Lng-A-T | 93   | chr4:72640950-72641050 |
| chr4 | 72699650 | 72699750 | 1100-Lng-A-T | 107  | chr4:72699650-72699750 |

**Table S2: SB Insertion regions**

|      |          |          |              |      |                        |
|------|----------|----------|--------------|------|------------------------|
| chr4 | 72703450 | 72703550 | 1100-Lng-A-T | 123  | chr4:72703450-72703550 |
| chr4 | 72780250 | 72780350 | 1100-Lng-A-T | 54   | chr4:72780250-72780350 |
| chr4 | 72799750 | 72799850 | 901-Lng-C-T  | 30   | chr4:72799750-72799850 |
| chr4 | 72813150 | 72813250 | 1151-Lng-A-T | 54   | chr4:72813150-72813250 |
| chr4 | 72840550 | 72840650 | 901-Lng-B-T  | 220  | chr4:72840550-72840650 |
| chr4 | 72860250 | 72860350 | 1223-Lng-A-T | 119  | chr4:72860250-72860350 |
| chr4 | 73009450 | 73009550 | 1100-Lng-A-T | 52   | chr4:73009450-73009550 |
| chr4 | 73019550 | 73019650 | 901-Lng-B-T  | 56   | chr4:73019550-73019650 |
| chr4 | 73085850 | 73085950 | 1065-Lng-B-T | 107  | chr4:73085850-73085950 |
| chr4 | 73259550 | 73259650 | 1223-Lng-B-T | 35   | chr4:73259550-73259650 |
| chr4 | 73359550 | 73359650 | 1090-Lng-B-T | 637  | chr4:73359550-73359650 |
| chr4 | 73378350 | 73378450 | 1100-Lng-A-T | 60   | chr4:73378350-73378450 |
| chr4 | 73379850 | 73379950 | 1152-Lng-A-T | 468  | chr4:73379850-73379950 |
| chr4 | 73385850 | 73385950 | 1100-Lng-A-T | 281  | chr4:73385850-73385950 |
| chr4 | 73389350 | 73389450 | 1090-Lng-A-T | 69   | chr4:73389350-73389450 |
| chr4 | 73410950 | 73411050 | 1065-Lng-A-T | 37   | chr4:73410950-73411050 |
| chr4 | 73412950 | 73413050 | 1065-Lng-A-T | 92   | chr4:73412950-73413050 |
| chr4 | 73883950 | 73884050 | 1151-Lng-A-T | 82   | chr4:73883950-73884050 |
| chr4 | 73935950 | 73936050 | 901-Lng-A-T  | 105  | chr4:73935950-73936050 |
| chr4 | 73936550 | 73936650 | 1065-Lng-B-T | 56   | chr4:73936550-73936650 |
| chr4 | 73943750 | 73943850 | 846-Lng-A-T  | 56   | chr4:73943750-73943850 |
| chr4 | 73965950 | 73966050 | 846-Lng-A-T  | 145  | chr4:73965950-73966050 |
| chr4 | 73970450 | 73970550 | 1223-Lng-B-T | 89   | chr4:73970450-73970550 |
| chr4 | 74014150 | 74014250 | 901-Lng-C-T  | 49   | chr4:74014150-74014250 |
| chr4 | 74022150 | 74022250 | 1065-Lng-A-T | 106  | chr4:74022150-74022250 |
| chr4 | 74026750 | 74026850 | 1072-Lng-A-T | 84   | chr4:74026750-74026850 |
| chr4 | 74030850 | 74030950 | 901-Lng-C-T  | 48   | chr4:74030850-74030950 |
| chr4 | 74038750 | 74038850 | 901-Lng-D-T  | 252  | chr4:74038750-74038850 |
| chr4 | 74049150 | 74049250 | 1072-Lng-A-T | 163  | chr4:74049150-74049250 |
| chr4 | 74371850 | 74371950 | 1274-Lng-A-T | 76   | chr4:74371850-74371950 |
| chr4 | 74560250 | 74560350 | 1065-Lng-B-T | 56   | chr4:74560250-74560350 |
| chr4 | 74752750 | 74752850 | 1152-Lng-A-T | 108  | chr4:74752750-74752850 |
| chr4 | 74849850 | 74849950 | 901-Lng-A-T  | 271  | chr4:74849850-74849950 |
| chr4 | 74984450 | 74984550 | 1004-Lng-A-T | 51   | chr4:74984450-74984550 |
| chr4 | 75192450 | 75192550 | 1065-Lng-C-T | 2770 | chr4:75192450-75192550 |
| chr4 | 75328150 | 75328250 | 1223-Lng-A-T | 59   | chr4:75328150-75328250 |
| chr4 | 75394750 | 75394850 | 901-Lng-D-T  | 443  | chr4:75394750-75394850 |
| chr4 | 75698650 | 75698750 | 1188-Lng-A-T | 259  | chr4:75698650-75698750 |
| chr4 | 75731350 | 75731450 | 1100-Lng-A-T | 74   | chr4:75731350-75731450 |
| chr4 | 75763550 | 75763650 | 1065-Lng-C-T | 85   | chr4:75763550-75763650 |
| chr4 | 75831650 | 75831750 | 1152-Lng-A-T | 62   | chr4:75831650-75831750 |
| chr4 | 75929750 | 75929850 | 1065-Lng-C-T | 110  | chr4:75929750-75929850 |
| chr4 | 76013850 | 76013950 | 1065-Lng-A-T | 58   | chr4:76013850-76013950 |
| chr4 | 76068650 | 76068750 | 1274-Lng-A-T | 62   | chr4:76068650-76068750 |
| chr4 | 76360450 | 76360550 | 901-Lng-B-T  | 126  | chr4:76360450-76360550 |
| chr4 | 76369950 | 76370050 | 901-Lng-C-T  | 61   | chr4:76369950-76370050 |

**Table S2: SB Insertion regions**

|      |          |          |              |      |                        |
|------|----------|----------|--------------|------|------------------------|
| chr4 | 76406850 | 76406950 | 1072-Lng-A-T | 95   | chr4:76406850-76406950 |
| chr4 | 76439150 | 76439250 | 1152-Lng-A-T | 50   | chr4:76439150-76439250 |
| chr4 | 76494550 | 76494650 | 901-Lng-D-T  | 132  | chr4:76494550-76494650 |
| chr4 | 76703150 | 76703250 | 901-Lng-B-T  | 206  | chr4:76703150-76703250 |
| chr4 | 76720950 | 76721050 | 1004-Lng-A-T | 60   | chr4:76720950-76721050 |
| chr4 | 76776550 | 76776650 | 1072-Lng-A-T | 129  | chr4:76776550-76776650 |
| chr4 | 76808550 | 76808650 | 1152-Lng-A-T | 42   | chr4:76808550-76808650 |
| chr4 | 76827350 | 76827450 | 901-Lng-A-T  | 110  | chr4:76827350-76827450 |
| chr4 | 76892050 | 76892150 | 1152-Lng-A-T | 80   | chr4:76892050-76892150 |
| chr4 | 77084850 | 77084950 | 1152-Lng-A-T | 53   | chr4:77084850-77084950 |
| chr4 | 77122250 | 77122350 | 1090-Lng-A-T | 98   | chr4:77122250-77122350 |
| chr4 | 77124450 | 77124550 | 1151-Lng-A-T | 58   | chr4:77124450-77124550 |
| chr4 | 77207250 | 77207350 | 1223-Lng-D-T | 55   | chr4:77207250-77207350 |
| chr4 | 77209050 | 77209150 | 1152-Lng-A-T | 72   | chr4:77209050-77209150 |
| chr4 | 77226050 | 77226150 | 1167-Lng-A-T | 119  | chr4:77226050-77226150 |
| chr4 | 77382750 | 77382850 | 1065-Lng-B-T | 86   | chr4:77382750-77382850 |
| chr4 | 77464150 | 77464250 | 901-Lng-C-T  | 31   | chr4:77464150-77464250 |
| chr4 | 77501450 | 77501550 | 1152-Lng-A-T | 93   | chr4:77501450-77501550 |
| chr4 | 77594750 | 77594850 | 1065-Lng-A-T | 53   | chr4:77594750-77594850 |
| chr4 | 77700250 | 77700350 | 901-Lng-C-T  | 43   | chr4:77700250-77700350 |
| chr4 | 77927850 | 77927950 | 1065-Lng-C-T | 63   | chr4:77927850-77927950 |
| chr4 | 77987950 | 77988050 | 901-Lng-D-T  | 48   | chr4:77987950-77988050 |
| chr4 | 78017850 | 78017950 | 901-Lng-C-T  | 31   | chr4:78017850-78017950 |
| chr4 | 78099250 | 78099350 | 1065-Lng-A-T | 53   | chr4:78099250-78099350 |
| chr4 | 78175750 | 78175850 | 1100-Lng-A-T | 82   | chr4:78175750-78175850 |
| chr4 | 78275050 | 78275150 | 1072-Lng-A-T | 222  | chr4:78275050-78275150 |
| chr4 | 78296950 | 78297050 | 1151-Lng-A-T | 67   | chr4:78296950-78297050 |
| chr4 | 78407850 | 78407950 | 1152-Lng-A-T | 34   | chr4:78407850-78407950 |
| chr4 | 78449950 | 78450050 | 1090-Lng-A-T | 97   | chr4:78449950-78450050 |
| chr4 | 78488450 | 78488550 | 1223-Lng-B-T | 77   | chr4:78488450-78488550 |
| chr4 | 78489150 | 78489250 | 1152-Lng-A-T | 33   | chr4:78489150-78489250 |
| chr4 | 78560950 | 78561050 | 901-Lng-B-T  | 110  | chr4:78560950-78561050 |
| chr4 | 78591750 | 78591850 | 901-Lng-C-T  | 146  | chr4:78591750-78591850 |
| chr4 | 78619750 | 78619850 | 1152-Lng-A-T | 132  | chr4:78619750-78619850 |
| chr4 | 78679450 | 78679550 | 1152-Lng-A-T | 285  | chr4:78679450-78679550 |
| chr4 | 78963250 | 78963350 | 1065-Lng-B-T | 45   | chr4:78963250-78963350 |
| chr4 | 79220250 | 79220350 | 901-Lng-B-T  | 300  | chr4:79220250-79220350 |
| chr4 | 79228850 | 79228950 | 1065-Lng-C-T | 72   | chr4:79228850-79228950 |
| chr4 | 79241150 | 79241250 | 901-Lng-C-T  | 41   | chr4:79241150-79241250 |
| chr4 | 79241950 | 79242050 | 901-Lng-D-T  | 1031 | chr4:79241950-79242050 |
| chr4 | 79294950 | 79295050 | 1090-Lng-A-T | 53   | chr4:79294950-79295050 |
| chr4 | 79457750 | 79457850 | 901-Lng-A-T  | 68   | chr4:79457750-79457850 |
| chr4 | 79534150 | 79534250 | 1167-Lng-A-T | 61   | chr4:79534150-79534250 |
| chr4 | 79659750 | 79659850 | 1188-Lng-A-T | 44   | chr4:79659750-79659850 |
| chr4 | 79723850 | 79723950 | 1152-Lng-A-T | 141  | chr4:79723850-79723950 |
| chr4 | 79785050 | 79785150 | 846-Lng-A-T  | 65   | chr4:79785050-79785150 |

**Table S2: SB Insertion regions**

|      |          |          |              |     |                        |
|------|----------|----------|--------------|-----|------------------------|
| chr4 | 79865750 | 79865850 | 1274-Lng-A-T | 111 | chr4:79865750-79865850 |
| chr4 | 79991350 | 79991450 | 1100-Lng-A-T | 66  | chr4:79991350-79991450 |
| chr4 | 80064450 | 80064550 | 1100-Lng-A-T | 184 | chr4:80064450-80064550 |
| chr4 | 80313550 | 80313650 | 1004-Lng-A-T | 92  | chr4:80313550-80313650 |
| chr4 | 80368850 | 80368950 | 901-Lng-C-T  | 44  | chr4:80368850-80368950 |
| chr4 | 80532650 | 80532750 | 1151-Lng-A-T | 55  | chr4:80532650-80532750 |
| chr4 | 80564850 | 80564950 | 1151-Lng-A-T | 60  | chr4:80564850-80564950 |
| chr4 | 80570050 | 80570150 | 1223-Lng-D-T | 47  | chr4:80570050-80570150 |
| chr4 | 80581050 | 80581150 | 1274-Lng-A-T | 91  | chr4:80581050-80581150 |
| chr4 | 80589650 | 80589750 | 1274-Lng-A-T | 161 | chr4:80589650-80589750 |
| chr4 | 80590350 | 80590450 | 1065-Lng-C-T | 109 | chr4:80590350-80590450 |
| chr4 | 80595950 | 80596050 | 1274-Lng-A-T | 74  | chr4:80595950-80596050 |
| chr4 | 80604150 | 80604250 | 1100-Lng-A-T | 252 | chr4:80604150-80604250 |
| chr4 | 80636350 | 80636450 | 1223-Lng-B-T | 36  | chr4:80636350-80636450 |
| chr4 | 80817750 | 80817850 | 1065-Lng-C-T | 92  | chr4:80817750-80817850 |
| chr4 | 81140150 | 81140250 | 1065-Lng-C-T | 103 | chr4:81140150-81140250 |
| chr4 | 81533450 | 81533550 | 1065-Lng-B-T | 90  | chr4:81533450-81533550 |
| chr4 | 81607750 | 81607850 | 1223-Lng-B-T | 38  | chr4:81607750-81607850 |
| chr4 | 81647450 | 81647550 | 1223-Lng-A-T | 544 | chr4:81647450-81647550 |
| chr4 | 81947950 | 81948050 | 1152-Lng-A-T | 107 | chr4:81947950-81948050 |
| chr4 | 81976250 | 81976350 | 1274-Lng-A-T | 54  | chr4:81976250-81976350 |
| chr4 | 81982550 | 81982650 | 1100-Lng-A-T | 119 | chr4:81982550-81982650 |
| chr4 | 81995750 | 81995850 | 1151-Lng-A-T | 349 | chr4:81995750-81995850 |
| chr4 | 82013250 | 82013350 | 1152-Lng-A-T | 40  | chr4:82013250-82013350 |
| chr4 | 82045150 | 82045250 | 901-Lng-A-T  | 69  | chr4:82045150-82045250 |
| chr4 | 82056050 | 82056150 | 1100-Lng-A-T | 72  | chr4:82056050-82056150 |
| chr4 | 82063150 | 82063250 | 1151-Lng-A-T | 421 | chr4:82063150-82063250 |
| chr4 | 82068250 | 82068350 | 1223-Lng-C-T | 51  | chr4:82068250-82068350 |
| chr4 | 82072050 | 82072150 | 1223-Lng-A-T | 121 | chr4:82072050-82072150 |
| chr4 | 82081250 | 82081350 | 1223-Lng-D-T | 54  | chr4:82081250-82081350 |
| chr4 | 82106550 | 82106650 | 1065-Lng-A-T | 66  | chr4:82106550-82106650 |
| chr4 | 82110450 | 82110550 | 1223-Lng-D-T | 98  | chr4:82110450-82110550 |
| chr4 | 82130350 | 82130450 | 1100-Lng-A-T | 114 | chr4:82130350-82130450 |
| chr4 | 82136950 | 82137050 | 1090-Lng-A-T | 56  | chr4:82136950-82137050 |
| chr4 | 82148350 | 82148450 | 1151-Lng-A-T | 65  | chr4:82148350-82148450 |
| chr4 | 82148650 | 82148750 | 1223-Lng-B-T | 51  | chr4:82148650-82148750 |
| chr4 | 82300450 | 82300550 | 1090-Lng-A-T | 112 | chr4:82300450-82300550 |
| chr4 | 82478050 | 82478150 | 1223-Lng-B-T | 57  | chr4:82478050-82478150 |
| chr4 | 82482150 | 82482250 | 1100-Lng-B-T | 240 | chr4:82482150-82482250 |
| chr4 | 82494350 | 82494450 | 1100-Lng-B-T | 164 | chr4:82494350-82494450 |
| chr4 | 82683350 | 82683450 | 1274-Lng-A-T | 192 | chr4:82683350-82683450 |
| chr4 | 82825150 | 82825250 | 1100-Lng-B-T | 51  | chr4:82825150-82825250 |
| chr4 | 82871150 | 82871250 | 1223-Lng-D-T | 60  | chr4:82871150-82871250 |
| chr4 | 82882350 | 82882450 | 1152-Lng-A-T | 62  | chr4:82882350-82882450 |
| chr4 | 82907150 | 82907250 | 901-Lng-B-T  | 203 | chr4:82907150-82907250 |
| chr4 | 82922150 | 82922250 | 846-Lng-A-T  | 79  | chr4:82922150-82922250 |



**Table S2: SB Insertion regions**

|      |          |          |              |      |                        |
|------|----------|----------|--------------|------|------------------------|
| chr4 | 82923850 | 82923950 | 1274-Lng-A-T | 122  | chr4:82923850-82923950 |
| chr4 | 82926050 | 82926150 | 1274-Lng-A-T | 234  | chr4:82926050-82926150 |
| chr4 | 82938150 | 82938250 | 1065-Lng-A-T | 69   | chr4:82938150-82938250 |
| chr4 | 83100550 | 83100650 | 1004-Lng-A-T | 75   | chr4:83100550-83100650 |
| chr4 | 83301450 | 83301550 | 846-Lng-A-T  | 101  | chr4:83301450-83301550 |
| chr4 | 83316950 | 83317050 | 1065-Lng-A-T | 49   | chr4:83316950-83317050 |
| chr4 | 84440550 | 84440650 | 901-Lng-B-T  | 56   | chr4:84440550-84440650 |
| chr4 | 84527350 | 84527450 | 1223-Lng-D-T | 60   | chr4:84527350-84527450 |
| chr4 | 84916850 | 84916950 | 1223-Lng-B-T | 181  | chr4:84916850-84916950 |
| chr4 | 85035650 | 85035750 | 901-Lng-A-T  | 79   | chr4:85035650-85035750 |
| chr4 | 85178950 | 85179050 | 1100-Lng-B-T | 63   | chr4:85178950-85179050 |
| chr4 | 85178950 | 85179050 | 1100-Lng-B-T | 4673 | chr4:85178950-85179050 |
| chr4 | 85219550 | 85219650 | 1223-Lng-D-T | 1183 | chr4:85219550-85219650 |
| chr4 | 85332750 | 85332850 | 1065-Lng-C-T | 63   | chr4:85332750-85332850 |
| chr4 | 85462850 | 85462950 | 901-Lng-A-T  | 327  | chr4:85462850-85462950 |
| chr4 | 85637450 | 85637550 | 1065-Lng-C-T | 91   | chr4:85637450-85637550 |
| chr4 | 85701650 | 85701750 | 1223-Lng-B-T | 61   | chr4:85701650-85701750 |
| chr4 | 85734450 | 85734550 | 901-Lng-A-T  | 83   | chr4:85734450-85734550 |
| chr4 | 85754350 | 85754450 | 1188-Lng-A-T | 119  | chr4:85754350-85754450 |
| chr4 | 85825450 | 85825550 | 1274-Lng-A-T | 57   | chr4:85825450-85825550 |
| chr4 | 85934450 | 85934550 | 901-Lng-B-T  | 187  | chr4:85934450-85934550 |
| chr4 | 85952650 | 85952750 | 1274-Lng-A-T | 51   | chr4:85952650-85952750 |
| chr4 | 86220150 | 86220250 | 1223-Lng-B-T | 35   | chr4:86220150-86220250 |
| chr4 | 86272050 | 86272150 | 1223-Lng-A-T | 296  | chr4:86272050-86272150 |
| chr4 | 86332050 | 86332150 | 1100-Lng-A-T | 71   | chr4:86332050-86332150 |
| chr4 | 86408450 | 86408550 | 1223-Lng-B-T | 47   | chr4:86408450-86408550 |
| chr4 | 86499150 | 86499250 | 901-Lng-A-T  | 110  | chr4:86499150-86499250 |
| chr4 | 86627350 | 86627450 | 901-Lng-A-T  | 99   | chr4:86627350-86627450 |
| chr4 | 86716050 | 86716150 | 1090-Lng-B-T | 656  | chr4:86716050-86716150 |
| chr4 | 86771350 | 86771450 | 901-Lng-D-T  | 62   | chr4:86771350-86771450 |
| chr4 | 86971850 | 86971950 | 1065-Lng-A-T | 58   | chr4:86971850-86971950 |
| chr4 | 86991850 | 86991950 | 1065-Lng-C-T | 62   | chr4:86991850-86991950 |
| chr4 | 87061350 | 87061450 | 1065-Lng-B-T | 75   | chr4:87061350-87061450 |
| chr4 | 87084950 | 87085050 | 1065-Lng-C-T | 90   | chr4:87084950-87085050 |
| chr4 | 87239050 | 87239150 | 1100-Lng-A-T | 74   | chr4:87239050-87239150 |
| chr4 | 87280150 | 87280250 | 1100-Lng-A-T | 66   | chr4:87280150-87280250 |
| chr4 | 87292450 | 87292550 | 901-Lng-C-T  | 67   | chr4:87292450-87292550 |
| chr4 | 87398650 | 87398750 | 1223-Lng-C-T | 54   | chr4:87398650-87398750 |
| chr4 | 87405550 | 87405650 | 1065-Lng-B-T | 62   | chr4:87405550-87405650 |
| chr4 | 87407450 | 87407550 | 1100-Lng-A-T | 127  | chr4:87407450-87407550 |
| chr4 | 87415750 | 87415850 | 1223-Lng-C-T | 45   | chr4:87415750-87415850 |
| chr4 | 87468050 | 87468150 | 1274-Lng-A-T | 64   | chr4:87468050-87468150 |
| chr4 | 87489850 | 87489950 | 1065-Lng-B-T | 47   | chr4:87489850-87489950 |
| chr4 | 87530150 | 87530250 | 1100-Lng-A-T | 52   | chr4:87530150-87530250 |
| chr4 | 87549450 | 87549550 | 1151-Lng-A-T | 69   | chr4:87549450-87549550 |
| chr4 | 87569750 | 87569850 | 901-Lng-A-T  | 116  | chr4:87569750-87569850 |

**Table S2: SB Insertion regions**

|      |          |          |              |      |                        |
|------|----------|----------|--------------|------|------------------------|
| chr4 | 87582550 | 87582650 | 1100-Lng-A-T | 121  | chr4:87582550-87582650 |
| chr4 | 87599250 | 87599350 | 1004-Lng-A-T | 71   | chr4:87599250-87599350 |
| chr4 | 87609250 | 87609350 | 1004-Lng-A-T | 1624 | chr4:87609250-87609350 |
| chr4 | 87695450 | 87695550 | 901-Lng-D-T  | 131  | chr4:87695450-87695550 |
| chr4 | 87798250 | 87798350 | 1188-Lng-A-T | 61   | chr4:87798250-87798350 |
| chr4 | 87897250 | 87897350 | 1065-Lng-B-T | 81   | chr4:87897250-87897350 |
| chr4 | 87922750 | 87922850 | 901-Lng-A-T  | 419  | chr4:87922750-87922850 |
| chr4 | 88362750 | 88362850 | 1274-Lng-A-T | 207  | chr4:88362750-88362850 |
| chr4 | 88365850 | 88365950 | 1100-Lng-A-T | 128  | chr4:88365850-88365950 |
| chr4 | 88508050 | 88508150 | 1100-Lng-A-T | 100  | chr4:88508050-88508150 |
| chr4 | 88555450 | 88555550 | 1090-Lng-A-T | 69   | chr4:88555450-88555550 |
| chr4 | 88564050 | 88564150 | 1100-Lng-A-T | 77   | chr4:88564050-88564150 |
| chr4 | 88571450 | 88571550 | 1223-Lng-A-T | 72   | chr4:88571450-88571550 |
| chr4 | 88677150 | 88677250 | 846-Lng-A-T  | 122  | chr4:88677150-88677250 |
| chr4 | 88818950 | 88819050 | 901-Lng-A-T  | 74   | chr4:88818950-88819050 |
| chr4 | 88935950 | 88936050 | 1100-Lng-B-T | 490  | chr4:88935950-88936050 |
| chr4 | 89093350 | 89093450 | 1100-Lng-A-T | 122  | chr4:89093350-89093450 |
| chr4 | 89166750 | 89166850 | 1065-Lng-C-T | 61   | chr4:89166750-89166850 |
| chr4 | 89487650 | 89487750 | 1188-Lng-A-T | 44   | chr4:89487650-89487750 |
| chr4 | 89585450 | 89585550 | 1151-Lng-A-T | 70   | chr4:89585450-89585550 |
| chr4 | 89604250 | 89604350 | 901-Lng-B-T  | 147  | chr4:89604250-89604350 |
| chr4 | 89614150 | 89614250 | 1065-Lng-A-T | 81   | chr4:89614150-89614250 |
| chr4 | 89616250 | 89616350 | 1072-Lng-A-T | 65   | chr4:89616250-89616350 |
| chr4 | 89633550 | 89633650 | 1152-Lng-A-T | 71   | chr4:89633550-89633650 |
| chr4 | 89663550 | 89663650 | 901-Lng-C-T  | 257  | chr4:89663550-89663650 |
| chr4 | 89791050 | 89791150 | 1274-Lng-A-T | 68   | chr4:89791050-89791150 |
| chr4 | 89930750 | 89930850 | 1274-Lng-A-T | 73   | chr4:89930750-89930850 |
| chr4 | 89995150 | 89995250 | 901-Lng-C-T  | 89   | chr4:89995150-89995250 |
| chr4 | 90176150 | 90176250 | 1151-Lng-A-T | 240  | chr4:90176150-90176250 |
| chr4 | 90461450 | 90461550 | 1151-Lng-A-T | 86   | chr4:90461450-90461550 |
| chr4 | 90558350 | 90558450 | 1072-Lng-A-T | 126  | chr4:90558350-90558450 |
| chr4 | 91215750 | 91215850 | 1004-Lng-A-T | 89   | chr4:91215750-91215850 |
| chr4 | 91419550 | 91419650 | 901-Lng-B-T  | 132  | chr4:91419550-91419650 |
| chr4 | 91501650 | 91501750 | 1065-Lng-B-T | 59   | chr4:91501650-91501750 |
| chr4 | 91764450 | 91764550 | 901-Lng-A-T  | 58   | chr4:91764450-91764550 |
| chr4 | 91995950 | 91996050 | 1100-Lng-B-T | 52   | chr4:91995950-91996050 |
| chr4 | 92085450 | 92085550 | 1065-Lng-A-T | 101  | chr4:92085450-92085550 |
| chr4 | 92168950 | 92169050 | 1152-Lng-A-T | 96   | chr4:92168950-92169050 |
| chr4 | 92215150 | 92215250 | 1090-Lng-A-T | 774  | chr4:92215150-92215250 |
| chr4 | 92322550 | 92322650 | 1274-Lng-A-T | 53   | chr4:92322550-92322650 |
| chr4 | 92333050 | 92333150 | 1065-Lng-C-T | 86   | chr4:92333050-92333150 |
| chr4 | 92385550 | 92385650 | 1188-Lng-A-T | 52   | chr4:92385550-92385650 |
| chr4 | 92424350 | 92424450 | 1152-Lng-A-T | 50   | chr4:92424350-92424450 |
| chr4 | 92456650 | 92456750 | 901-Lng-B-T  | 62   | chr4:92456650-92456750 |
| chr4 | 92471050 | 92471150 | 1065-Lng-C-T | 70   | chr4:92471050-92471150 |
| chr4 | 92574250 | 92574350 | 901-Lng-A-T  | 91   | chr4:92574250-92574350 |

**Table S2: SB Insertion regions**

|      |          |          |              |     |                        |
|------|----------|----------|--------------|-----|------------------------|
| chr4 | 92583550 | 92583650 | 1065-Lng-B-T | 63  | chr4:92583550-92583650 |
| chr4 | 92628850 | 92628950 | 1065-Lng-A-T | 117 | chr4:92628850-92628950 |
| chr4 | 92756750 | 92756850 | 1223-Lng-A-T | 224 | chr4:92756750-92756850 |
| chr4 | 92780350 | 92780450 | 1188-Lng-A-T | 56  | chr4:92780350-92780450 |
| chr4 | 92964350 | 92964450 | 901-Lng-B-T  | 122 | chr4:92964350-92964450 |
| chr4 | 93063950 | 93064050 | 1152-Lng-A-T | 35  | chr4:93063950-93064050 |
| chr4 | 93106450 | 93106550 | 1065-Lng-B-T | 54  | chr4:93106450-93106550 |
| chr4 | 93116750 | 93116850 | 1100-Lng-A-T | 142 | chr4:93116750-93116850 |
| chr4 | 93165750 | 93165850 | 1167-Lng-A-T | 71  | chr4:93165750-93165850 |
| chr4 | 93272050 | 93272150 | 1072-Lng-A-T | 55  | chr4:93272050-93272150 |
| chr4 | 93342050 | 93342150 | 1065-Lng-A-T | 158 | chr4:93342050-93342150 |
| chr4 | 93398650 | 93398750 | 1274-Lng-A-T | 80  | chr4:93398650-93398750 |
| chr4 | 93417150 | 93417250 | 1004-Lng-A-T | 52  | chr4:93417150-93417250 |
| chr4 | 93790050 | 93790150 | 1065-Lng-C-T | 68  | chr4:93790050-93790150 |
| chr4 | 93805150 | 93805250 | 1223-Lng-A-T | 92  | chr4:93805150-93805250 |
| chr4 | 94207150 | 94207250 | 1072-Lng-A-T | 51  | chr4:94207150-94207250 |
| chr4 | 94209250 | 94209350 | 1152-Lng-A-T | 70  | chr4:94209250-94209350 |
| chr4 | 94253150 | 94253250 | 1151-Lng-A-T | 136 | chr4:94253150-94253250 |
| chr4 | 94257950 | 94258050 | 1065-Lng-B-T | 41  | chr4:94257950-94258050 |
| chr4 | 94260550 | 94260650 | 1223-Lng-D-T | 70  | chr4:94260550-94260650 |
| chr4 | 94318450 | 94318550 | 1274-Lng-A-T | 125 | chr4:94318450-94318550 |
| chr4 | 94399150 | 94399250 | 901-Lng-A-T  | 51  | chr4:94399150-94399250 |
| chr4 | 94530350 | 94530450 | 901-Lng-A-T  | 50  | chr4:94530350-94530450 |
| chr4 | 94543950 | 94544050 | 1065-Lng-C-T | 61  | chr4:94543950-94544050 |
| chr4 | 94627650 | 94627750 | 1152-Lng-A-T | 150 | chr4:94627650-94627750 |
| chr4 | 94630150 | 94630250 | 1223-Lng-B-T | 37  | chr4:94630150-94630250 |
| chr4 | 94639950 | 94640050 | 1004-Lng-A-T | 51  | chr4:94639950-94640050 |
| chr4 | 94660950 | 94661050 | 1065-Lng-B-T | 110 | chr4:94660950-94661050 |
| chr4 | 94763650 | 94763750 | 1151-Lng-A-T | 61  | chr4:94763650-94763750 |
| chr4 | 94802050 | 94802150 | 1152-Lng-A-T | 56  | chr4:94802050-94802150 |
| chr4 | 94819550 | 94819650 | 1223-Lng-B-T | 183 | chr4:94819550-94819650 |
| chr4 | 94829450 | 94829550 | 1188-Lng-A-T | 157 | chr4:94829450-94829550 |
| chr4 | 94947350 | 94947450 | 1065-Lng-B-T | 75  | chr4:94947350-94947450 |
| chr4 | 94951150 | 94951250 | 1100-Lng-A-T | 90  | chr4:94951150-94951250 |
| chr4 | 95091350 | 95091450 | 1100-Lng-A-T | 119 | chr4:95091350-95091450 |
| chr4 | 95125850 | 95125950 | 1274-Lng-A-T | 194 | chr4:95125850-95125950 |
| chr4 | 95234850 | 95234950 | 901-Lng-A-T  | 50  | chr4:95234850-95234950 |
| chr4 | 95447250 | 95447350 | 901-Lng-C-T  | 80  | chr4:95447250-95447350 |
| chr4 | 95494450 | 95494550 | 1065-Lng-A-T | 49  | chr4:95494450-95494550 |
| chr4 | 95640550 | 95640650 | 1223-Lng-B-T | 236 | chr4:95640550-95640650 |
| chr4 | 95652850 | 95652950 | 1065-Lng-B-T | 98  | chr4:95652850-95652950 |
| chr4 | 95814450 | 95814550 | 901-Lng-C-T  | 45  | chr4:95814450-95814550 |
| chr4 | 95819050 | 95819150 | 1152-Lng-A-T | 463 | chr4:95819050-95819150 |
| chr4 | 96201550 | 96201650 | 1072-Lng-A-T | 97  | chr4:96201550-96201650 |
| chr4 | 96332550 | 96332650 | 1151-Lng-A-T | 68  | chr4:96332550-96332650 |
| chr4 | 96479950 | 96480050 | 1152-Lng-A-T | 94  | chr4:96479950-96480050 |

**Table S2: SB Insertion regions**

|      |          |          |              |      |                        |
|------|----------|----------|--------------|------|------------------------|
| chr4 | 96728750 | 96728850 | 1223-Lng-A-T | 2685 | chr4:96728750-96728850 |
| chr4 | 97002650 | 97002750 | 1274-Lng-A-T | 166  | chr4:97002650-97002750 |
| chr4 | 97191550 | 97191650 | 1274-Lng-A-T | 116  | chr4:97191550-97191650 |
| chr4 | 97264250 | 97264350 | 846-Lng-A-T  | 136  | chr4:97264250-97264350 |
| chr4 | 97337450 | 97337550 | 901-Lng-A-T  | 68   | chr4:97337450-97337550 |
| chr4 | 97398250 | 97398350 | 1167-Lng-A-T | 54   | chr4:97398250-97398350 |
| chr4 | 97400650 | 97400750 | 1152-Lng-A-T | 52   | chr4:97400650-97400750 |
| chr4 | 97454950 | 97455050 | 1152-Lng-A-T | 75   | chr4:97454950-97455050 |
| chr4 | 97461150 | 97461250 | 1090-Lng-B-T | 312  | chr4:97461150-97461250 |
| chr4 | 97496650 | 97496750 | 1223-Lng-A-T | 134  | chr4:97496650-97496750 |
| chr4 | 97497250 | 97497350 | 1152-Lng-A-T | 65   | chr4:97497250-97497350 |
| chr4 | 97503550 | 97503650 | 1090-Lng-B-T | 227  | chr4:97503550-97503650 |
| chr4 | 97525350 | 97525450 | 1065-Lng-B-T | 64   | chr4:97525350-97525450 |
| chr4 | 97551550 | 97551650 | 1072-Lng-A-T | 53   | chr4:97551550-97551650 |
| chr4 | 97578450 | 97578550 | 1152-Lng-A-T | 37   | chr4:97578450-97578550 |
| chr4 | 97610650 | 97610750 | 1072-Lng-A-T | 174  | chr4:97610650-97610750 |
| chr4 | 97611350 | 97611450 | 901-Lng-A-T  | 90   | chr4:97611350-97611450 |
| chr4 | 97625550 | 97625650 | 1072-Lng-A-T | 85   | chr4:97625550-97625650 |
| chr4 | 97634650 | 97634750 | 1065-Lng-B-T | 65   | chr4:97634650-97634750 |
| chr4 | 97641550 | 97641650 | 1065-Lng-C-T | 93   | chr4:97641550-97641650 |
| chr4 | 97661850 | 97661950 | 901-Lng-A-T  | 81   | chr4:97661850-97661950 |
| chr4 | 97669950 | 97670050 | 1152-Lng-A-T | 195  | chr4:97669950-97670050 |
| chr4 | 97693550 | 97693650 | 1274-Lng-A-T | 69   | chr4:97693550-97693650 |
| chr4 | 97693850 | 97693950 | 1100-Lng-A-T | 72   | chr4:97693850-97693950 |
| chr4 | 97696150 | 97696250 | 1100-Lng-A-T | 366  | chr4:97696150-97696250 |
| chr4 | 97706950 | 97707050 | 1004-Lng-A-T | 78   | chr4:97706950-97707050 |
| chr4 | 97709450 | 97709550 | 1223-Lng-D-T | 107  | chr4:97709450-97709550 |
| chr4 | 97710050 | 97710150 | 1100-Lng-A-T | 71   | chr4:97710050-97710150 |
| chr4 | 97711650 | 97711750 | 1223-Lng-A-T | 185  | chr4:97711650-97711750 |
| chr4 | 97742550 | 97742650 | 1065-Lng-B-T | 102  | chr4:97742550-97742650 |
| chr4 | 97745750 | 97745850 | 1100-Lng-A-T | 217  | chr4:97745750-97745850 |
| chr4 | 97751150 | 97751250 | 1065-Lng-A-T | 67   | chr4:97751150-97751250 |
| chr4 | 97754250 | 97754350 | 1151-Lng-A-T | 320  | chr4:97754250-97754350 |
| chr4 | 97760650 | 97760750 | 1167-Lng-A-T | 154  | chr4:97760650-97760750 |
| chr4 | 97777550 | 97777650 | 1100-Lng-A-T | 68   | chr4:97777550-97777650 |
| chr4 | 97915950 | 97916050 | 1065-Lng-B-T | 356  | chr4:97915950-97916050 |
| chr4 | 98032150 | 98032250 | 901-Lng-A-T  | 125  | chr4:98032150-98032250 |
| chr4 | 98071050 | 98071150 | 1151-Lng-A-T | 250  | chr4:98071050-98071150 |
| chr4 | 98074350 | 98074450 | 1065-Lng-B-T | 91   | chr4:98074350-98074450 |
| chr4 | 98205150 | 98205250 | 1100-Lng-A-T | 130  | chr4:98205150-98205250 |
| chr4 | 98210350 | 98210450 | 1274-Lng-A-T | 93   | chr4:98210350-98210450 |
| chr4 | 98299350 | 98299450 | 1065-Lng-C-T | 96   | chr4:98299350-98299450 |
| chr4 | 98335950 | 98336050 | 901-Lng-A-T  | 86   | chr4:98335950-98336050 |
| chr4 | 98623150 | 98623250 | 1065-Lng-A-T | 77   | chr4:98623150-98623250 |
| chr4 | 98629550 | 98629650 | 1188-Lng-A-T | 39   | chr4:98629550-98629650 |
| chr4 | 98786050 | 98786150 | 1100-Lng-A-T | 84   | chr4:98786050-98786150 |

**Table S2: SB Insertion regions**

|      |           |           |              |      |                          |
|------|-----------|-----------|--------------|------|--------------------------|
| chr4 | 99488350  | 99488450  | 1274-Lng-A-T | 153  | chr4:99488350-99488450   |
| chr4 | 99607650  | 99607750  | 1151-Lng-A-T | 299  | chr4:99607650-99607750   |
| chr4 | 99610650  | 99610750  | 1065-Lng-B-T | 69   | chr4:99610650-99610750   |
| chr4 | 99717250  | 99717350  | 1151-Lng-A-T | 63   | chr4:99717250-99717350   |
| chr4 | 99827350  | 99827450  | 1100-Lng-A-T | 62   | chr4:99827350-99827450   |
| chr4 | 99863550  | 99863650  | 901-Lng-C-T  | 62   | chr4:99863550-99863650   |
| chr4 | 99868050  | 99868150  | 1188-Lng-A-T | 43   | chr4:99868050-99868150   |
| chr4 | 99878450  | 99878550  | 1223-Lng-D-T | 133  | chr4:99878450-99878550   |
| chr4 | 99923050  | 99923150  | 1151-Lng-A-T | 229  | chr4:99923050-99923150   |
| chr4 | 99923750  | 99923850  | 1152-Lng-A-T | 83   | chr4:99923750-99923850   |
| chr4 | 99932750  | 99932850  | 1100-Lng-A-T | 74   | chr4:99932750-99932850   |
| chr4 | 99989550  | 99989650  | 1004-Lng-A-T | 52   | chr4:99989550-99989650   |
| chr4 | 100024250 | 100024350 | 1072-Lng-A-T | 157  | chr4:100024250-100024350 |
| chr4 | 100031750 | 100031850 | 1100-Lng-A-T | 89   | chr4:100031750-100031850 |
| chr4 | 100041650 | 100041750 | 1223-Lng-D-T | 46   | chr4:100041650-100041750 |
| chr4 | 100074250 | 100074350 | 1151-Lng-A-T | 81   | chr4:100074250-100074350 |
| chr4 | 100099050 | 100099150 | 901-Lng-A-T  | 138  | chr4:100099050-100099150 |
| chr4 | 100309650 | 100309750 | 1065-Lng-B-T | 60   | chr4:100309650-100309750 |
| chr4 | 100478850 | 100478950 | 901-Lng-A-T  | 84   | chr4:100478850-100478950 |
| chr4 | 100480050 | 100480150 | 1004-Lng-A-T | 231  | chr4:100480050-100480150 |
| chr4 | 100499450 | 100499550 | 1065-Lng-B-T | 67   | chr4:100499450-100499550 |
| chr4 | 100548750 | 100548850 | 901-Lng-C-T  | 45   | chr4:100548750-100548850 |
| chr4 | 100572550 | 100572650 | 1274-Lng-A-T | 55   | chr4:100572550-100572650 |
| chr4 | 100587550 | 100587650 | 1188-Lng-A-T | 373  | chr4:100587550-100587650 |
| chr4 | 100592350 | 100592450 | 1274-Lng-A-T | 156  | chr4:100592350-100592450 |
| chr4 | 100618850 | 100618950 | 1152-Lng-A-T | 71   | chr4:100618850-100618950 |
| chr4 | 100817650 | 100817750 | 1152-Lng-A-T | 89   | chr4:100817650-100817750 |
| chr4 | 100851050 | 100851150 | 901-Lng-B-T  | 185  | chr4:100851050-100851150 |
| chr4 | 100881250 | 100881350 | 1100-Lng-A-T | 127  | chr4:100881250-100881350 |
| chr4 | 100883450 | 100883550 | 901-Lng-D-T  | 80   | chr4:100883450-100883550 |
| chr4 | 100897150 | 100897250 | 901-Lng-A-T  | 111  | chr4:100897150-100897250 |
| chr4 | 100934550 | 100934650 | 901-Lng-A-T  | 82   | chr4:100934550-100934650 |
| chr4 | 101026450 | 101026550 | 1100-Lng-A-T | 88   | chr4:101026450-101026550 |
| chr4 | 101111450 | 101111550 | 1223-Lng-B-T | 48   | chr4:101111450-101111550 |
| chr4 | 101412450 | 101412550 | 1223-Lng-B-T | 40   | chr4:101412450-101412550 |
| chr4 | 101440950 | 101441050 | 1065-Lng-A-T | 96   | chr4:101440950-101441050 |
| chr4 | 101806850 | 101806950 | 1188-Lng-A-T | 65   | chr4:101806850-101806950 |
| chr4 | 101853450 | 101853550 | 1100-Lng-A-T | 60   | chr4:101853450-101853550 |
| chr4 | 102038950 | 102039050 | 846-Lng-A-T  | 74   | chr4:102038950-102039050 |
| chr4 | 102220050 | 102220150 | 1274-Lng-A-T | 57   | chr4:102220050-102220150 |
| chr4 | 102510750 | 102510850 | 1152-Lng-A-T | 48   | chr4:102510750-102510850 |
| chr4 | 102523050 | 102523150 | 901-Lng-A-T  | 106  | chr4:102523050-102523150 |
| chr4 | 102756750 | 102756850 | 901-Lng-D-T  | 72   | chr4:102756750-102756850 |
| chr4 | 102767250 | 102767350 | 1065-Lng-C-T | 1718 | chr4:102767250-102767350 |
| chr4 | 102802350 | 102802450 | 1151-Lng-A-T | 399  | chr4:102802350-102802450 |
| chr4 | 102802550 | 102802650 | 1188-Lng-A-T | 46   | chr4:102802550-102802650 |

**Table S2: SB Insertion regions**

|      |           |           |              |      |                          |
|------|-----------|-----------|--------------|------|--------------------------|
| chr4 | 102818750 | 102818850 | 1100-Lng-A-T | 62   | chr4:102818750-102818850 |
| chr4 | 102832950 | 102833050 | 1223-Lng-C-T | 78   | chr4:102832950-102833050 |
| chr4 | 102836250 | 102836350 | 1223-Lng-D-T | 143  | chr4:102836250-102836350 |
| chr4 | 102927150 | 102927250 | 1152-Lng-A-T | 319  | chr4:102927150-102927250 |
| chr4 | 102941050 | 102941150 | 846-Lng-A-T  | 256  | chr4:102941050-102941150 |
| chr4 | 103033350 | 103033450 | 1065-Lng-C-T | 82   | chr4:103033350-103033450 |
| chr4 | 103038850 | 103038950 | 846-Lng-A-T  | 148  | chr4:103038850-103038950 |
| chr4 | 103286450 | 103286550 | 1072-Lng-A-T | 235  | chr4:103286450-103286550 |
| chr4 | 103842650 | 103842750 | 1090-Lng-A-T | 88   | chr4:103842650-103842750 |
| chr4 | 103856550 | 103856650 | 1274-Lng-A-T | 50   | chr4:103856550-103856650 |
| chr4 | 103872650 | 103872750 | 1223-Lng-C-T | 54   | chr4:103872650-103872750 |
| chr4 | 103928050 | 103928150 | 1167-Lng-A-T | 50   | chr4:103928050-103928150 |
| chr4 | 104274650 | 104274750 | 1274-Lng-A-T | 510  | chr4:104274650-104274750 |
| chr4 | 104717150 | 104717250 | 1004-Lng-A-T | 88   | chr4:104717150-104717250 |
| chr4 | 104722250 | 104722350 | 1065-Lng-C-T | 72   | chr4:104722250-104722350 |
| chr4 | 104723350 | 104723450 | 1065-Lng-C-T | 1472 | chr4:104723350-104723450 |
| chr4 | 104725050 | 104725150 | 1065-Lng-C-T | 89   | chr4:104725050-104725150 |
| chr4 | 104733150 | 104733250 | 1065-Lng-B-T | 40   | chr4:104733150-104733250 |
| chr4 | 104764050 | 104764150 | 901-Lng-B-T  | 131  | chr4:104764050-104764150 |
| chr4 | 104849550 | 104849650 | 1223-Lng-D-T | 88   | chr4:104849550-104849650 |
| chr4 | 105323650 | 105323750 | 1004-Lng-A-T | 58   | chr4:105323650-105323750 |
| chr4 | 105846350 | 105846450 | 1090-Lng-A-T | 95   | chr4:105846350-105846450 |
| chr4 | 105998050 | 105998150 | 1223-Lng-D-T | 40   | chr4:105998050-105998150 |
| chr4 | 106007550 | 106007650 | 1152-Lng-A-T | 176  | chr4:106007550-106007650 |
| chr4 | 106012150 | 106012250 | 1072-Lng-A-T | 179  | chr4:106012150-106012250 |
| chr4 | 106022850 | 106022950 | 1090-Lng-A-T | 94   | chr4:106022850-106022950 |
| chr4 | 106050550 | 106050650 | 1100-Lng-A-T | 253  | chr4:106050550-106050650 |
| chr4 | 106090450 | 106090550 | 1090-Lng-A-T | 53   | chr4:106090450-106090550 |
| chr4 | 106113850 | 106113950 | 1223-Lng-D-T | 40   | chr4:106113850-106113950 |
| chr4 | 106350250 | 106350350 | 901-Lng-B-T  | 90   | chr4:106350250-106350350 |
| chr4 | 106387350 | 106387450 | 1065-Lng-A-T | 48   | chr4:106387350-106387450 |
| chr4 | 106407350 | 106407450 | 1151-Lng-A-T | 235  | chr4:106407350-106407450 |
| chr4 | 106606450 | 106606550 | 1151-Lng-A-T | 86   | chr4:106606450-106606550 |
| chr4 | 107028350 | 107028450 | 1223-Lng-B-T | 50   | chr4:107028350-107028450 |
| chr4 | 107554650 | 107554750 | 846-Lng-A-T  | 45   | chr4:107554650-107554750 |
| chr4 | 107558650 | 107558750 | 1274-Lng-A-T | 65   | chr4:107558650-107558750 |
| chr4 | 107733250 | 107733350 | 1188-Lng-A-T | 41   | chr4:107733250-107733350 |
| chr4 | 107755450 | 107755550 | 1100-Lng-A-T | 212  | chr4:107755450-107755550 |
| chr4 | 107847650 | 107847750 | 901-Lng-A-T  | 66   | chr4:107847650-107847750 |
| chr4 | 107969350 | 107969450 | 1004-Lng-A-T | 81   | chr4:107969350-107969450 |
| chr4 | 108140250 | 108140350 | 901-Lng-D-T  | 82   | chr4:108140250-108140350 |
| chr4 | 108160450 | 108160550 | 1072-Lng-A-T | 64   | chr4:108160450-108160550 |
| chr4 | 108230850 | 108230950 | 901-Lng-A-T  | 81   | chr4:108230850-108230950 |
| chr4 | 108300350 | 108300450 | 1072-Lng-A-T | 52   | chr4:108300350-108300450 |
| chr4 | 108349550 | 108349650 | 1065-Lng-C-T | 70   | chr4:108349550-108349650 |
| chr4 | 108363150 | 108363250 | 1065-Lng-A-T | 64   | chr4:108363150-108363250 |

**Table S2: SB Insertion regions**

|      |           |           |              |     |                          |
|------|-----------|-----------|--------------|-----|--------------------------|
| chr4 | 108409550 | 108409650 | 846-Lng-A-T  | 123 | chr4:108409550-108409650 |
| chr4 | 108425350 | 108425450 | 1065-Lng-B-T | 87  | chr4:108425350-108425450 |
| chr4 | 108434750 | 108434850 | 1065-Lng-B-T | 71  | chr4:108434750-108434850 |
| chr4 | 108451950 | 108452050 | 846-Lng-A-T  | 87  | chr4:108451950-108452050 |
| chr4 | 108517950 | 108518050 | 1100-Lng-A-T | 85  | chr4:108517950-108518050 |
| chr4 | 108542950 | 108543050 | 1004-Lng-A-T | 68  | chr4:108542950-108543050 |
| chr4 | 108701650 | 108701750 | 1100-Lng-A-T | 75  | chr4:108701650-108701750 |
| chr4 | 108750350 | 108750450 | 1152-Lng-A-T | 53  | chr4:108750350-108750450 |
| chr4 | 108768150 | 108768250 | 1152-Lng-A-T | 73  | chr4:108768150-108768250 |
| chr4 | 108795150 | 108795250 | 1151-Lng-A-T | 855 | chr4:108795150-108795250 |
| chr4 | 108803850 | 108803950 | 1223-Lng-D-T | 42  | chr4:108803850-108803950 |
| chr4 | 108805950 | 108806050 | 1100-Lng-A-T | 156 | chr4:108805950-108806050 |
| chr4 | 108870350 | 108870450 | 1100-Lng-A-T | 56  | chr4:108870350-108870450 |
| chr4 | 108927950 | 108928050 | 1151-Lng-A-T | 291 | chr4:108927950-108928050 |
| chr4 | 108929950 | 108930050 | 1223-Lng-B-T | 68  | chr4:108929950-108930050 |
| chr4 | 109069950 | 109070050 | 1100-Lng-A-T | 114 | chr4:109069950-109070050 |
| chr4 | 109071450 | 109071550 | 1072-Lng-A-T | 154 | chr4:109071450-109071550 |
| chr4 | 109140650 | 109140750 | 1065-Lng-B-T | 67  | chr4:109140650-109140750 |
| chr4 | 109152850 | 109152950 | 1167-Lng-A-T | 46  | chr4:109152850-109152950 |
| chr4 | 109251250 | 109251350 | 1065-Lng-B-T | 74  | chr4:109251250-109251350 |
| chr4 | 109354750 | 109354850 | 1152-Lng-A-T | 299 | chr4:109354750-109354850 |
| chr4 | 109357850 | 109357950 | 1100-Lng-A-T | 102 | chr4:109357850-109357950 |
| chr4 | 109384950 | 109385050 | 1223-Lng-C-T | 59  | chr4:109384950-109385050 |
| chr4 | 109389150 | 109389250 | 1004-Lng-A-T | 65  | chr4:109389150-109389250 |
| chr4 | 109407550 | 109407650 | 901-Lng-B-T  | 134 | chr4:109407550-109407650 |
| chr4 | 109501650 | 109501750 | 1090-Lng-A-T | 64  | chr4:109501650-109501750 |
| chr4 | 109503450 | 109503550 | 1065-Lng-B-T | 117 | chr4:109503450-109503550 |
| chr4 | 109567450 | 109567550 | 846-Lng-A-T  | 67  | chr4:109567450-109567550 |
| chr4 | 109584750 | 109584850 | 1223-Lng-D-T | 69  | chr4:109584750-109584850 |
| chr4 | 109600950 | 109601050 | 1152-Lng-A-T | 65  | chr4:109600950-109601050 |
| chr4 | 109617150 | 109617250 | 1188-Lng-A-T | 87  | chr4:109617150-109617250 |
| chr4 | 109617250 | 109617350 | 1100-Lng-A-T | 403 | chr4:109617250-109617350 |
| chr4 | 109743150 | 109743250 | 1004-Lng-A-T | 80  | chr4:109743150-109743250 |
| chr4 | 110022450 | 110022550 | 901-Lng-B-T  | 85  | chr4:110022450-110022550 |
| chr4 | 110035850 | 110035950 | 1167-Lng-A-T | 98  | chr4:110035850-110035950 |
| chr4 | 110039550 | 110039650 | 1152-Lng-A-T | 90  | chr4:110039550-110039650 |
| chr4 | 110069050 | 110069150 | 1223-Lng-A-T | 89  | chr4:110069050-110069150 |
| chr4 | 110113150 | 110113250 | 1152-Lng-A-T | 86  | chr4:110113150-110113250 |
| chr4 | 110359650 | 110359750 | 1274-Lng-A-T | 163 | chr4:110359650-110359750 |
| chr4 | 110373550 | 110373650 | 901-Lng-A-T  | 74  | chr4:110373550-110373650 |
| chr4 | 110458750 | 110458850 | 1100-Lng-A-T | 70  | chr4:110458750-110458850 |
| chr4 | 110471550 | 110471650 | 1100-Lng-A-T | 114 | chr4:110471550-110471650 |
| chr4 | 110557150 | 110557250 | 1223-Lng-A-T | 930 | chr4:110557150-110557250 |
| chr4 | 111088750 | 111088850 | 1151-Lng-A-T | 262 | chr4:111088750-111088850 |
| chr4 | 111209150 | 111209250 | 1223-Lng-B-T | 130 | chr4:111209150-111209250 |
| chr4 | 111242550 | 111242650 | 901-Lng-D-T  | 444 | chr4:111242550-111242650 |

**Table S2: SB Insertion regions**

|      |           |           |              |     |                          |
|------|-----------|-----------|--------------|-----|--------------------------|
| chr4 | 111290750 | 111290850 | 1100-Lng-A-T | 103 | chr4:111290750-111290850 |
| chr4 | 111334650 | 111334750 | 901-Lng-A-T  | 62  | chr4:111334650-111334750 |
| chr4 | 111406650 | 111406750 | 1223-Lng-A-T | 270 | chr4:111406650-111406750 |
| chr4 | 111542150 | 111542250 | 1090-Lng-B-T | 593 | chr4:111542150-111542250 |
| chr4 | 111784150 | 111784250 | 1065-Lng-B-T | 75  | chr4:111784150-111784250 |
| chr4 | 111881450 | 111881550 | 1152-Lng-A-T | 50  | chr4:111881450-111881550 |
| chr4 | 111943050 | 111943150 | 1152-Lng-A-T | 263 | chr4:111943050-111943150 |
| chr4 | 111948950 | 111949050 | 1274-Lng-A-T | 60  | chr4:111948950-111949050 |
| chr4 | 112074550 | 112074650 | 1065-Lng-C-T | 131 | chr4:112074550-112074650 |
| chr4 | 112121750 | 112121850 | 1223-Lng-B-T | 35  | chr4:112121750-112121850 |
| chr4 | 112351250 | 112351350 | 1223-Lng-B-T | 34  | chr4:112351250-112351350 |
| chr4 | 112386950 | 112387050 | 1090-Lng-B-T | 124 | chr4:112386950-112387050 |
| chr4 | 112493350 | 112493450 | 1152-Lng-A-T | 47  | chr4:112493350-112493450 |
| chr4 | 112505250 | 112505350 | 1004-Lng-A-T | 69  | chr4:112505250-112505350 |
| chr4 | 112551950 | 112552050 | 1274-Lng-A-T | 120 | chr4:112551950-112552050 |
| chr4 | 112857750 | 112857850 | 1090-Lng-A-T | 55  | chr4:112857750-112857850 |
| chr4 | 112918250 | 112918350 | 1065-Lng-B-T | 75  | chr4:112918250-112918350 |
| chr4 | 112970550 | 112970650 | 1004-Lng-A-T | 64  | chr4:112970550-112970650 |
| chr4 | 113081850 | 113081950 | 1152-Lng-A-T | 333 | chr4:113081850-113081950 |
| chr4 | 113309250 | 113309350 | 846-Lng-A-T  | 111 | chr4:113309250-113309350 |
| chr4 | 113406650 | 113406750 | 1004-Lng-A-T | 390 | chr4:113406650-113406750 |
| chr4 | 113492550 | 113492650 | 1152-Lng-A-T | 38  | chr4:113492550-113492650 |
| chr4 | 113553950 | 113554050 | 1100-Lng-A-T | 53  | chr4:113553950-113554050 |
| chr4 | 113677350 | 113677450 | 1188-Lng-A-T | 34  | chr4:113677350-113677450 |
| chr4 | 113758950 | 113759050 | 1151-Lng-A-T | 160 | chr4:113758950-113759050 |
| chr4 | 113772150 | 113772250 | 1065-Lng-C-T | 73  | chr4:113772150-113772250 |
| chr4 | 113838850 | 113838950 | 1152-Lng-A-T | 48  | chr4:113838850-113838950 |
| chr4 | 113986250 | 113986350 | 901-Lng-C-T  | 54  | chr4:113986250-113986350 |
| chr4 | 114205150 | 114205250 | 846-Lng-A-T  | 61  | chr4:114205150-114205250 |
| chr4 | 114245450 | 114245550 | 1065-Lng-C-T | 65  | chr4:114245450-114245550 |
| chr4 | 114291750 | 114291850 | 1065-Lng-A-T | 69  | chr4:114291750-114291850 |
| chr4 | 114590150 | 114590250 | 1274-Lng-A-T | 136 | chr4:114590150-114590250 |
| chr4 | 114639850 | 114639950 | 1151-Lng-A-T | 644 | chr4:114639850-114639950 |
| chr4 | 114652350 | 114652450 | 901-Lng-D-T  | 273 | chr4:114652350-114652450 |
| chr4 | 114760450 | 114760550 | 1100-Lng-A-T | 53  | chr4:114760450-114760550 |
| chr4 | 114939550 | 114939650 | 1223-Lng-C-T | 58  | chr4:114939550-114939650 |
| chr4 | 115065750 | 115065850 | 1065-Lng-B-T | 72  | chr4:115065750-115065850 |
| chr4 | 115326850 | 115326950 | 1100-Lng-B-T | 59  | chr4:115326850-115326950 |
| chr4 | 115419750 | 115419850 | 1065-Lng-C-T | 86  | chr4:115419750-115419850 |
| chr4 | 115420750 | 115420850 | 1274-Lng-A-T | 82  | chr4:115420750-115420850 |
| chr4 | 115438950 | 115439050 | 1100-Lng-A-T | 177 | chr4:115438950-115439050 |
| chr4 | 115446550 | 115446650 | 1100-Lng-A-T | 72  | chr4:115446550-115446650 |
| chr4 | 115459750 | 115459850 | 1100-Lng-A-T | 445 | chr4:115459750-115459850 |
| chr4 | 115476350 | 115476450 | 1072-Lng-A-T | 282 | chr4:115476350-115476450 |
| chr4 | 115502850 | 115502950 | 1100-Lng-B-T | 71  | chr4:115502850-115502950 |
| chr4 | 115518950 | 115519050 | 901-Lng-C-T  | 86  | chr4:115518950-115519050 |



**Table S2: SB Insertion regions**

|      |           |           |              |      |                          |
|------|-----------|-----------|--------------|------|--------------------------|
| chr4 | 115601750 | 115601850 | 1100-Lng-B-T | 52   | chr4:115601750-115601850 |
| chr4 | 115688050 | 115688150 | 901-Lng-B-T  | 180  | chr4:115688050-115688150 |
| chr4 | 115722150 | 115722250 | 1151-Lng-A-T | 86   | chr4:115722150-115722250 |
| chr4 | 115743150 | 115743250 | 1100-Lng-A-T | 124  | chr4:115743150-115743250 |
| chr4 | 115750050 | 115750150 | 1100-Lng-A-T | 73   | chr4:115750050-115750150 |
| chr4 | 115753950 | 115754050 | 1274-Lng-A-T | 80   | chr4:115753950-115754050 |
| chr4 | 115759350 | 115759450 | 1151-Lng-A-T | 296  | chr4:115759350-115759450 |
| chr4 | 115836150 | 115836250 | 1004-Lng-A-T | 123  | chr4:115836150-115836250 |
| chr4 | 115927150 | 115927250 | 1152-Lng-A-T | 73   | chr4:115927150-115927250 |
| chr4 | 115930050 | 115930150 | 1100-Lng-A-T | 68   | chr4:115930050-115930150 |
| chr4 | 115936050 | 115936150 | 1274-Lng-A-T | 65   | chr4:115936050-115936150 |
| chr4 | 116023150 | 116023250 | 1188-Lng-A-T | 65   | chr4:116023150-116023250 |
| chr4 | 116054350 | 116054450 | 901-Lng-B-T  | 67   | chr4:116054350-116054450 |
| chr4 | 116071750 | 116071850 | 1100-Lng-A-T | 87   | chr4:116071750-116071850 |
| chr4 | 116234950 | 116235050 | 1152-Lng-A-T | 129  | chr4:116234950-116235050 |
| chr4 | 116244650 | 116244750 | 901-Lng-B-T  | 49   | chr4:116244650-116244750 |
| chr4 | 116258450 | 116258550 | 1188-Lng-A-T | 41   | chr4:116258450-116258550 |
| chr4 | 116310250 | 116310350 | 1274-Lng-A-T | 60   | chr4:116310250-116310350 |
| chr4 | 116361350 | 116361450 | 1100-Lng-A-T | 63   | chr4:116361350-116361450 |
| chr4 | 116373350 | 116373450 | 1188-Lng-A-T | 47   | chr4:116373350-116373450 |
| chr4 | 116603950 | 116604050 | 1004-Lng-A-T | 69   | chr4:116603950-116604050 |
| chr4 | 116662350 | 116662450 | 901-Lng-B-T  | 263  | chr4:116662350-116662450 |
| chr4 | 116881350 | 116881450 | 1100-Lng-B-T | 108  | chr4:116881350-116881450 |
| chr4 | 117234150 | 117234250 | 1100-Lng-B-T | 51   | chr4:117234150-117234250 |
| chr4 | 117243750 | 117243850 | 1065-Lng-B-T | 72   | chr4:117243750-117243850 |
| chr4 | 117290150 | 117290250 | 1090-Lng-A-T | 54   | chr4:117290150-117290250 |
| chr4 | 117296650 | 117296750 | 1188-Lng-A-T | 110  | chr4:117296650-117296750 |
| chr4 | 117296850 | 117296950 | 1223-Lng-A-T | 1452 | chr4:117296850-117296950 |
| chr4 | 117330150 | 117330250 | 901-Lng-A-T  | 80   | chr4:117330150-117330250 |
| chr4 | 117380050 | 117380150 | 901-Lng-D-T  | 137  | chr4:117380050-117380150 |
| chr4 | 117625750 | 117625850 | 1274-Lng-A-T | 232  | chr4:117625750-117625850 |
| chr4 | 117681650 | 117681750 | 1065-Lng-A-T | 36   | chr4:117681650-117681750 |
| chr4 | 117695150 | 117695250 | 1151-Lng-A-T | 59   | chr4:117695150-117695250 |
| chr4 | 117788750 | 117788850 | 901-Lng-C-T  | 42   | chr4:117788750-117788850 |
| chr4 | 117796550 | 117796650 | 1167-Lng-A-T | 94   | chr4:117796550-117796650 |
| chr4 | 117931150 | 117931250 | 1100-Lng-A-T | 91   | chr4:117931150-117931250 |
| chr4 | 118019450 | 118019550 | 1065-Lng-B-T | 44   | chr4:118019450-118019550 |
| chr4 | 118027050 | 118027150 | 1188-Lng-A-T | 38   | chr4:118027050-118027150 |
| chr4 | 118033350 | 118033450 | 901-Lng-A-T  | 109  | chr4:118033350-118033450 |
| chr4 | 118042950 | 118043050 | 1188-Lng-A-T | 66   | chr4:118042950-118043050 |
| chr4 | 118050050 | 118050150 | 1188-Lng-A-T | 190  | chr4:118050050-118050150 |
| chr4 | 118066250 | 118066350 | 1223-Lng-A-T | 227  | chr4:118066250-118066350 |
| chr4 | 118662650 | 118662750 | 1065-Lng-A-T | 270  | chr4:118662650-118662750 |
| chr4 | 118678950 | 118679050 | 1065-Lng-B-T | 53   | chr4:118678950-118679050 |
| chr4 | 118758750 | 118758850 | 1065-Lng-C-T | 108  | chr4:118758750-118758850 |
| chr4 | 119039050 | 119039150 | 1223-Lng-B-T | 43   | chr4:119039050-119039150 |

**Table S2: SB Insertion regions**

|      |           |           |              |     |                          |
|------|-----------|-----------|--------------|-----|--------------------------|
| chr4 | 119090150 | 119090250 | 1072-Lng-A-T | 66  | chr4:119090150-119090250 |
| chr4 | 119163850 | 119163950 | 1188-Lng-A-T | 213 | chr4:119163850-119163950 |
| chr4 | 119202950 | 119203050 | 1065-Lng-A-T | 67  | chr4:119202950-119203050 |
| chr4 | 119233750 | 119233850 | 1072-Lng-A-T | 142 | chr4:119233750-119233850 |
| chr4 | 119242650 | 119242750 | 1100-Lng-A-T | 353 | chr4:119242650-119242750 |
| chr4 | 119261750 | 119261850 | 1100-Lng-A-T | 73  | chr4:119261750-119261850 |
| chr4 | 119283450 | 119283550 | 1223-Lng-D-T | 47  | chr4:119283450-119283550 |
| chr4 | 119283750 | 119283850 | 1167-Lng-A-T | 120 | chr4:119283750-119283850 |
| chr4 | 119408850 | 119408950 | 1004-Lng-A-T | 49  | chr4:119408850-119408950 |
| chr4 | 119412950 | 119413050 | 1090-Lng-B-T | 130 | chr4:119412950-119413050 |
| chr4 | 119851750 | 119851850 | 1188-Lng-A-T | 36  | chr4:119851750-119851850 |
| chr4 | 119853550 | 119853650 | 1072-Lng-A-T | 105 | chr4:119853550-119853650 |
| chr4 | 120039650 | 120039750 | 1167-Lng-A-T | 49  | chr4:120039650-120039750 |
| chr4 | 120044350 | 120044450 | 1152-Lng-A-T | 37  | chr4:120044350-120044450 |
| chr4 | 120065150 | 120065250 | 1274-Lng-A-T | 128 | chr4:120065150-120065250 |
| chr4 | 120116150 | 120116250 | 1100-Lng-A-T | 57  | chr4:120116150-120116250 |
| chr4 | 120121050 | 120121150 | 1100-Lng-A-T | 61  | chr4:120121050-120121150 |
| chr4 | 120171050 | 120171150 | 1065-Lng-C-T | 105 | chr4:120171050-120171150 |
| chr4 | 120218450 | 120218550 | 1100-Lng-A-T | 53  | chr4:120218450-120218550 |
| chr4 | 120223350 | 120223450 | 1188-Lng-A-T | 35  | chr4:120223350-120223450 |
| chr4 | 120228050 | 120228150 | 1188-Lng-A-T | 269 | chr4:120228050-120228150 |
| chr4 | 120246050 | 120246150 | 1100-Lng-A-T | 570 | chr4:120246050-120246150 |
| chr4 | 120460650 | 120460750 | 1274-Lng-A-T | 59  | chr4:120460650-120460750 |
| chr4 | 120499450 | 120499550 | 901-Lng-B-T  | 160 | chr4:120499450-120499550 |
| chr4 | 120636650 | 120636750 | 1151-Lng-A-T | 82  | chr4:120636650-120636750 |
| chr4 | 120654350 | 120654450 | 901-Lng-A-T  | 57  | chr4:120654350-120654450 |
| chr4 | 120670350 | 120670450 | 901-Lng-A-T  | 91  | chr4:120670350-120670450 |
| chr4 | 120825950 | 120826050 | 1065-Lng-C-T | 117 | chr4:120825950-120826050 |
| chr4 | 120838650 | 120838750 | 1100-Lng-A-T | 346 | chr4:120838650-120838750 |
| chr4 | 120853450 | 120853550 | 1188-Lng-A-T | 248 | chr4:120853450-120853550 |
| chr4 | 120853850 | 120853950 | 846-Lng-A-T  | 146 | chr4:120853850-120853950 |
| chr4 | 120853850 | 120853950 | 1274-Lng-A-T | 97  | chr4:120853850-120853950 |
| chr4 | 120869650 | 120869750 | 1100-Lng-A-T | 603 | chr4:120869650-120869750 |
| chr4 | 120875050 | 120875150 | 1188-Lng-A-T | 177 | chr4:120875050-120875150 |
| chr4 | 120875450 | 120875550 | 1100-Lng-A-T | 102 | chr4:120875450-120875550 |
| chr4 | 120882350 | 120882450 | 1100-Lng-A-T | 85  | chr4:120882350-120882450 |
| chr4 | 121357950 | 121358050 | 901-Lng-B-T  | 42  | chr4:121357950-121358050 |
| chr4 | 121361650 | 121361750 | 1004-Lng-A-T | 88  | chr4:121361650-121361750 |
| chr4 | 121651350 | 121651450 | 1152-Lng-A-T | 42  | chr4:121651350-121651450 |
| chr4 | 122447250 | 122447350 | 901-Lng-C-T  | 49  | chr4:122447250-122447350 |
| chr4 | 122449850 | 122449950 | 1004-Lng-A-T | 72  | chr4:122449850-122449950 |
| chr4 | 122527650 | 122527750 | 901-Lng-A-T  | 340 | chr4:122527650-122527750 |
| chr4 | 122550850 | 122550950 | 1152-Lng-A-T | 100 | chr4:122550850-122550950 |
| chr4 | 122551250 | 122551350 | 1151-Lng-A-T | 64  | chr4:122551250-122551350 |
| chr4 | 122644650 | 122644750 | 1065-Lng-A-T | 115 | chr4:122644650-122644750 |
| chr4 | 122664850 | 122664950 | 1151-Lng-A-T | 68  | chr4:122664850-122664950 |

**Table S2: SB Insertion regions**

|      |           |           |              |     |                          |
|------|-----------|-----------|--------------|-----|--------------------------|
| chr4 | 122683350 | 122683450 | 1274-Lng-A-T | 91  | chr4:122683350-122683450 |
| chr4 | 122694750 | 122694850 | 1152-Lng-A-T | 388 | chr4:122694750-122694850 |
| chr4 | 122707250 | 122707350 | 846-Lng-A-T  | 158 | chr4:122707250-122707350 |
| chr4 | 123035550 | 123035650 | 1151-Lng-A-T | 445 | chr4:123035550-123035650 |
| chr4 | 123099350 | 123099450 | 1065-Lng-C-T | 149 | chr4:123099350-123099450 |
| chr4 | 123108350 | 123108450 | 901-Lng-C-T  | 59  | chr4:123108350-123108450 |
| chr4 | 123147050 | 123147150 | 901-Lng-D-T  | 253 | chr4:123147050-123147150 |
| chr4 | 123168250 | 123168350 | 1223-Lng-C-T | 72  | chr4:123168250-123168350 |
| chr4 | 123175250 | 123175350 | 1065-Lng-A-T | 46  | chr4:123175250-123175350 |
| chr4 | 123186750 | 123186850 | 1188-Lng-A-T | 304 | chr4:123186750-123186850 |
| chr4 | 123199350 | 123199450 | 1090-Lng-A-T | 76  | chr4:123199350-123199450 |
| chr4 | 123201750 | 123201850 | 1274-Lng-A-T | 71  | chr4:123201750-123201850 |
| chr4 | 123206850 | 123206950 | 1065-Lng-C-T | 79  | chr4:123206850-123206950 |
| chr4 | 123233650 | 123233750 | 1188-Lng-A-T | 39  | chr4:123233650-123233750 |
| chr4 | 123238550 | 123238650 | 1004-Lng-A-T | 680 | chr4:123238550-123238650 |
| chr4 | 123255550 | 123255650 | 1100-Lng-B-T | 55  | chr4:123255550-123255650 |
| chr4 | 123276850 | 123276950 | 1188-Lng-A-T | 226 | chr4:123276850-123276950 |
| chr4 | 123297850 | 123297950 | 1100-Lng-A-T | 69  | chr4:123297850-123297950 |
| chr4 | 123298950 | 123299050 | 1152-Lng-A-T | 78  | chr4:123298950-123299050 |
| chr4 | 123299750 | 123299850 | 1167-Lng-A-T | 82  | chr4:123299750-123299850 |
| chr4 | 123336450 | 123336550 | 1274-Lng-A-T | 92  | chr4:123336450-123336550 |
| chr4 | 123347350 | 123347450 | 901-Lng-C-T  | 36  | chr4:123347350-123347450 |
| chr4 | 123351250 | 123351350 | 1065-Lng-A-T | 101 | chr4:123351250-123351350 |
| chr4 | 123413550 | 123413650 | 1274-Lng-A-T | 183 | chr4:123413550-123413650 |
| chr4 | 123424250 | 123424350 | 1274-Lng-A-T | 189 | chr4:123424250-123424350 |
| chr4 | 123583050 | 123583150 | 1065-Lng-C-T | 72  | chr4:123583050-123583150 |
| chr4 | 123601450 | 123601550 | 1188-Lng-A-T | 157 | chr4:123601450-123601550 |
| chr4 | 123602150 | 123602250 | 901-Lng-A-T  | 68  | chr4:123602150-123602250 |
| chr4 | 123628050 | 123628150 | 1004-Lng-A-T | 58  | chr4:123628050-123628150 |
| chr4 | 123709750 | 123709850 | 1072-Lng-A-T | 78  | chr4:123709750-123709850 |
| chr4 | 123924550 | 123924650 | 1274-Lng-A-T | 201 | chr4:123924550-123924650 |
| chr4 | 123939650 | 123939750 | 1090-Lng-A-T | 123 | chr4:123939650-123939750 |
| chr4 | 124447250 | 124447350 | 846-Lng-A-T  | 65  | chr4:124447250-124447350 |
| chr4 | 124467650 | 124467750 | 1152-Lng-A-T | 46  | chr4:124467650-124467750 |
| chr4 | 124768850 | 124768950 | 1100-Lng-A-T | 51  | chr4:124768850-124768950 |
| chr4 | 125045550 | 125045650 | 1100-Lng-A-T | 96  | chr4:125045550-125045650 |
| chr4 | 125062850 | 125062950 | 1065-Lng-B-T | 48  | chr4:125062850-125062950 |
| chr4 | 125374350 | 125374450 | 1151-Lng-A-T | 68  | chr4:125374350-125374450 |
| chr4 | 125751850 | 125751950 | 1100-Lng-B-T | 61  | chr4:125751850-125751950 |
| chr4 | 125783150 | 125783250 | 901-Lng-A-T  | 91  | chr4:125783150-125783250 |
| chr4 | 125793850 | 125793950 | 1223-Lng-D-T | 83  | chr4:125793850-125793950 |
| chr4 | 125796550 | 125796650 | 1151-Lng-A-T | 57  | chr4:125796550-125796650 |
| chr4 | 125868650 | 125868750 | 1152-Lng-A-T | 66  | chr4:125868650-125868750 |
| chr4 | 126011950 | 126012050 | 1152-Lng-A-T | 34  | chr4:126011950-126012050 |
| chr4 | 126028450 | 126028550 | 901-Lng-C-T  | 55  | chr4:126028450-126028550 |
| chr4 | 126076250 | 126076350 | 1274-Lng-A-T | 65  | chr4:126076250-126076350 |

**Table S2: SB Insertion regions**

|      |           |           |              |      |                          |
|------|-----------|-----------|--------------|------|--------------------------|
| chr4 | 126099450 | 126099550 | 1152-Lng-A-T | 78   | chr4:126099450-126099550 |
| chr4 | 126110850 | 126110950 | 1223-Lng-D-T | 48   | chr4:126110850-126110950 |
| chr4 | 126196750 | 126196850 | 1100-Lng-A-T | 93   | chr4:126196750-126196850 |
| chr4 | 126208850 | 126208950 | 1100-Lng-A-T | 104  | chr4:126208850-126208950 |
| chr4 | 126227950 | 126228050 | 1100-Lng-A-T | 93   | chr4:126227950-126228050 |
| chr4 | 126370050 | 126370150 | 1004-Lng-A-T | 65   | chr4:126370050-126370150 |
| chr4 | 126378150 | 126378250 | 1152-Lng-A-T | 170  | chr4:126378150-126378250 |
| chr4 | 126510150 | 126510250 | 1223-Lng-C-T | 220  | chr4:126510150-126510250 |
| chr4 | 126538450 | 126538550 | 901-Lng-D-T  | 76   | chr4:126538450-126538550 |
| chr4 | 126544550 | 126544650 | 1151-Lng-A-T | 101  | chr4:126544550-126544650 |
| chr4 | 126548650 | 126548750 | 1223-Lng-C-T | 488  | chr4:126548650-126548750 |
| chr4 | 126622750 | 126622850 | 1274-Lng-A-T | 75   | chr4:126622750-126622850 |
| chr4 | 126642250 | 126642350 | 901-Lng-A-T  | 52   | chr4:126642250-126642350 |
| chr4 | 126701450 | 126701550 | 1152-Lng-A-T | 37   | chr4:126701450-126701550 |
| chr4 | 126712150 | 126712250 | 1274-Lng-A-T | 195  | chr4:126712150-126712250 |
| chr4 | 126713050 | 126713150 | 901-Lng-B-T  | 52   | chr4:126713050-126713150 |
| chr4 | 127783550 | 127783650 | 1274-Lng-A-T | 99   | chr4:127783550-127783650 |
| chr4 | 128103950 | 128104050 | 1223-Lng-B-T | 156  | chr4:128103950-128104050 |
| chr4 | 128172350 | 128172450 | 1090-Lng-A-T | 44   | chr4:128172350-128172450 |
| chr4 | 128275850 | 128275950 | 846-Lng-A-T  | 93   | chr4:128275850-128275950 |
| chr4 | 128376450 | 128376550 | 1188-Lng-A-T | 178  | chr4:128376450-128376550 |
| chr4 | 128383250 | 128383350 | 1100-Lng-B-T | 1150 | chr4:128383250-128383350 |
| chr4 | 128430150 | 128430250 | 1100-Lng-A-T | 104  | chr4:128430150-128430250 |
| chr4 | 128497650 | 128497750 | 1065-Lng-A-T | 45   | chr4:128497650-128497750 |
| chr4 | 128540750 | 128540850 | 1100-Lng-A-T | 79   | chr4:128540750-128540850 |
| chr4 | 128582050 | 128582150 | 1223-Lng-B-T | 58   | chr4:128582050-128582150 |
| chr4 | 128643850 | 128643950 | 1223-Lng-B-T | 57   | chr4:128643850-128643950 |
| chr4 | 128822650 | 128822750 | 1223-Lng-A-T | 69   | chr4:128822650-128822750 |
| chr4 | 128860250 | 128860350 | 1151-Lng-A-T | 55   | chr4:128860250-128860350 |
| chr4 | 128940250 | 128940350 | 901-Lng-C-T  | 87   | chr4:128940250-128940350 |
| chr4 | 129005750 | 129005850 | 1065-Lng-A-T | 99   | chr4:129005750-129005850 |
| chr4 | 129051150 | 129051250 | 901-Lng-A-T  | 559  | chr4:129051150-129051250 |
| chr4 | 129398050 | 129398150 | 1100-Lng-A-T | 169  | chr4:129398050-129398150 |
| chr4 | 129495050 | 129495150 | 1090-Lng-A-T | 54   | chr4:129495050-129495150 |
| chr4 | 129886350 | 129886450 | 1223-Lng-B-T | 44   | chr4:129886350-129886450 |
| chr4 | 130228850 | 130228950 | 1188-Lng-A-T | 87   | chr4:130228850-130228950 |
| chr4 | 130232550 | 130232650 | 1152-Lng-A-T | 39   | chr4:130232550-130232650 |
| chr4 | 130238450 | 130238550 | 1151-Lng-A-T | 62   | chr4:130238450-130238550 |
| chr4 | 130280250 | 130280350 | 1167-Lng-A-T | 67   | chr4:130280250-130280350 |
| chr4 | 130281150 | 130281250 | 1100-Lng-B-T | 62   | chr4:130281150-130281250 |
| chr4 | 130305650 | 130305750 | 1223-Lng-A-T | 58   | chr4:130305650-130305750 |
| chr4 | 130316250 | 130316350 | 1090-Lng-B-T | 232  | chr4:130316250-130316350 |
| chr4 | 130470650 | 130470750 | 1090-Lng-A-T | 51   | chr4:130470650-130470750 |
| chr4 | 130507950 | 130508050 | 1090-Lng-A-T | 50   | chr4:130507950-130508050 |
| chr4 | 131379250 | 131379350 | 1188-Lng-A-T | 178  | chr4:131379250-131379350 |
| chr4 | 131482550 | 131482650 | 901-Lng-A-T  | 85   | chr4:131482550-131482650 |

**Table S2: SB Insertion regions**

|      |           |           |              |     |                          |
|------|-----------|-----------|--------------|-----|--------------------------|
| chr4 | 131501150 | 131501250 | 901-Lng-D-T  | 296 | chr4:131501150-131501250 |
| chr4 | 131507250 | 131507350 | 1223-Lng-C-T | 43  | chr4:131507250-131507350 |
| chr4 | 131522450 | 131522550 | 1004-Lng-A-T | 86  | chr4:131522450-131522550 |
| chr4 | 131531150 | 131531250 | 1188-Lng-A-T | 52  | chr4:131531150-131531250 |
| chr4 | 131537750 | 131537850 | 1274-Lng-A-T | 124 | chr4:131537750-131537850 |
| chr4 | 131541550 | 131541650 | 1065-Lng-A-T | 57  | chr4:131541550-131541650 |
| chr4 | 131542950 | 131543050 | 1090-Lng-A-T | 55  | chr4:131542950-131543050 |
| chr4 | 131567350 | 131567450 | 1188-Lng-A-T | 42  | chr4:131567350-131567450 |
| chr4 | 131573150 | 131573250 | 901-Lng-D-T  | 149 | chr4:131573150-131573250 |
| chr4 | 131577450 | 131577550 | 1100-Lng-A-T | 56  | chr4:131577450-131577550 |
| chr4 | 131594450 | 131594550 | 1090-Lng-A-T | 805 | chr4:131594450-131594550 |
| chr4 | 131602450 | 131602550 | 1151-Lng-A-T | 76  | chr4:131602450-131602550 |
| chr4 | 131752150 | 131752250 | 1223-Lng-B-T | 34  | chr4:131752150-131752250 |
| chr4 | 131829350 | 131829450 | 901-Lng-C-T  | 61  | chr4:131829350-131829450 |
| chr4 | 131935150 | 131935250 | 1223-Lng-C-T | 46  | chr4:131935150-131935250 |
| chr4 | 131949550 | 131949650 | 1072-Lng-A-T | 59  | chr4:131949550-131949650 |
| chr4 | 131962650 | 131962750 | 1152-Lng-A-T | 79  | chr4:131962650-131962750 |
| chr4 | 132037550 | 132037650 | 1072-Lng-A-T | 86  | chr4:132037550-132037650 |
| chr4 | 132101650 | 132101750 | 1223-Lng-B-T | 104 | chr4:132101650-132101750 |
| chr4 | 132104050 | 132104150 | 1188-Lng-A-T | 153 | chr4:132104050-132104150 |
| chr4 | 132226250 | 132226350 | 1065-Lng-B-T | 106 | chr4:132226250-132226350 |
| chr4 | 132252150 | 132252250 | 1152-Lng-A-T | 95  | chr4:132252150-132252250 |
| chr4 | 132384950 | 132385050 | 1223-Lng-D-T | 116 | chr4:132384950-132385050 |
| chr4 | 132416250 | 132416350 | 1065-Lng-A-T | 79  | chr4:132416250-132416350 |
| chr4 | 132662950 | 132663050 | 901-Lng-A-T  | 80  | chr4:132662950-132663050 |
| chr4 | 132677850 | 132677950 | 1223-Lng-B-T | 196 | chr4:132677850-132677950 |
| chr4 | 132714450 | 132714550 | 1223-Lng-B-T | 35  | chr4:132714450-132714550 |
| chr4 | 132716450 | 132716550 | 1274-Lng-A-T | 56  | chr4:132716450-132716550 |
| chr4 | 132735050 | 132735150 | 1188-Lng-A-T | 117 | chr4:132735050-132735150 |
| chr4 | 132877450 | 132877550 | 1065-Lng-A-T | 55  | chr4:132877450-132877550 |
| chr4 | 132917450 | 132917550 | 1100-Lng-A-T | 97  | chr4:132917450-132917550 |
| chr4 | 132937250 | 132937350 | 1100-Lng-A-T | 103 | chr4:132937250-132937350 |
| chr4 | 133100450 | 133100550 | 1274-Lng-A-T | 109 | chr4:133100450-133100550 |
| chr4 | 133243450 | 133243550 | 1065-Lng-A-T | 39  | chr4:133243450-133243550 |
| chr4 | 133271850 | 133271950 | 1274-Lng-A-T | 88  | chr4:133271850-133271950 |
| chr4 | 133273850 | 133273950 | 1152-Lng-A-T | 133 | chr4:133273850-133273950 |
| chr4 | 133280550 | 133280650 | 1065-Lng-B-T | 46  | chr4:133280550-133280650 |
| chr4 | 133291250 | 133291350 | 1274-Lng-A-T | 52  | chr4:133291250-133291350 |
| chr4 | 133302550 | 133302650 | 1090-Lng-B-T | 268 | chr4:133302550-133302650 |
| chr4 | 133304150 | 133304250 | 1090-Lng-A-T | 99  | chr4:133304150-133304250 |
| chr4 | 133346650 | 133346750 | 1167-Lng-A-T | 299 | chr4:133346650-133346750 |
| chr4 | 133381650 | 133381750 | 901-Lng-D-T  | 173 | chr4:133381650-133381750 |
| chr4 | 133654350 | 133654450 | 1274-Lng-A-T | 150 | chr4:133654350-133654450 |
| chr4 | 133683650 | 133683750 | 1223-Lng-B-T | 100 | chr4:133683650-133683750 |
| chr4 | 133740750 | 133740850 | 1151-Lng-A-T | 70  | chr4:133740750-133740850 |
| chr4 | 133842150 | 133842250 | 1274-Lng-A-T | 52  | chr4:133842150-133842250 |

**Table S2: SB Insertion regions**

|      |           |           |              |      |                          |
|------|-----------|-----------|--------------|------|--------------------------|
| chr4 | 134109350 | 134109450 | 901-Lng-D-T  | 122  | chr4:134109350-134109450 |
| chr4 | 134166450 | 134166550 | 1100-Lng-A-T | 64   | chr4:134166450-134166550 |
| chr4 | 134207150 | 134207250 | 1152-Lng-A-T | 46   | chr4:134207150-134207250 |
| chr4 | 134207650 | 134207750 | 1167-Lng-A-T | 128  | chr4:134207650-134207750 |
| chr4 | 134359450 | 134359550 | 1151-Lng-A-T | 281  | chr4:134359450-134359550 |
| chr4 | 134372850 | 134372950 | 1223-Lng-D-T | 56   | chr4:134372850-134372950 |
| chr4 | 134373450 | 134373550 | 1065-Lng-C-T | 86   | chr4:134373450-134373550 |
| chr4 | 134405150 | 134405250 | 1274-Lng-A-T | 69   | chr4:134405150-134405250 |
| chr4 | 134481750 | 134481850 | 1065-Lng-B-T | 76   | chr4:134481750-134481850 |
| chr4 | 134485350 | 134485450 | 1100-Lng-A-T | 58   | chr4:134485350-134485450 |
| chr4 | 134805250 | 134805350 | 1223-Lng-D-T | 46   | chr4:134805250-134805350 |
| chr4 | 135052550 | 135052650 | 1223-Lng-C-T | 158  | chr4:135052550-135052650 |
| chr4 | 135114350 | 135114450 | 1151-Lng-A-T | 361  | chr4:135114350-135114450 |
| chr4 | 135367450 | 135367550 | 901-Lng-B-T  | 373  | chr4:135367450-135367550 |
| chr4 | 135575250 | 135575350 | 1065-Lng-B-T | 42   | chr4:135575250-135575350 |
| chr4 | 135875450 | 135875550 | 1151-Lng-A-T | 243  | chr4:135875450-135875550 |
| chr4 | 135888450 | 135888550 | 1072-Lng-A-T | 266  | chr4:135888450-135888550 |
| chr4 | 135941550 | 135941650 | 1152-Lng-A-T | 88   | chr4:135941550-135941650 |
| chr4 | 136096950 | 136097050 | 1065-Lng-C-T | 140  | chr4:136096950-136097050 |
| chr4 | 136110950 | 136111050 | 1065-Lng-B-T | 70   | chr4:136110950-136111050 |
| chr4 | 136797450 | 136797550 | 1065-Lng-A-T | 132  | chr4:136797450-136797550 |
| chr4 | 136989850 | 136989950 | 1065-Lng-C-T | 88   | chr4:136989850-136989950 |
| chr4 | 137159550 | 137159650 | 1223-Lng-D-T | 53   | chr4:137159550-137159650 |
| chr4 | 137171450 | 137171550 | 1151-Lng-A-T | 169  | chr4:137171450-137171550 |
| chr4 | 137267350 | 137267450 | 901-Lng-C-T  | 55   | chr4:137267350-137267450 |
| chr4 | 137399150 | 137399250 | 901-Lng-A-T  | 58   | chr4:137399150-137399250 |
| chr4 | 137492250 | 137492350 | 1090-Lng-A-T | 1324 | chr4:137492250-137492350 |
| chr4 | 137538950 | 137539050 | 1004-Lng-A-T | 109  | chr4:137538950-137539050 |
| chr4 | 137626050 | 137626150 | 1167-Lng-A-T | 54   | chr4:137626050-137626150 |
| chr4 | 137626150 | 137626250 | 1188-Lng-A-T | 323  | chr4:137626150-137626250 |
| chr4 | 137636450 | 137636550 | 1274-Lng-A-T | 75   | chr4:137636450-137636550 |
| chr4 | 137658350 | 137658450 | 1223-Lng-A-T | 325  | chr4:137658350-137658450 |
| chr4 | 137720150 | 137720250 | 901-Lng-C-T  | 82   | chr4:137720150-137720250 |
| chr4 | 137889150 | 137889250 | 1090-Lng-B-T | 208  | chr4:137889150-137889250 |
| chr4 | 138264950 | 138265050 | 1188-Lng-A-T | 42   | chr4:138264950-138265050 |
| chr4 | 138382250 | 138382350 | 1151-Lng-A-T | 74   | chr4:138382250-138382350 |
| chr4 | 138421950 | 138422050 | 1223-Lng-C-T | 84   | chr4:138421950-138422050 |
| chr4 | 138514050 | 138514150 | 1100-Lng-A-T | 74   | chr4:138514050-138514150 |
| chr4 | 138665650 | 138665750 | 1151-Lng-A-T | 346  | chr4:138665650-138665750 |
| chr4 | 138684750 | 138684850 | 901-Lng-B-T  | 41   | chr4:138684750-138684850 |
| chr4 | 138869250 | 138869350 | 1274-Lng-A-T | 383  | chr4:138869250-138869350 |
| chr4 | 138945850 | 138945950 | 1188-Lng-A-T | 45   | chr4:138945850-138945950 |
| chr4 | 139003150 | 139003250 | 846-Lng-A-T  | 163  | chr4:139003150-139003250 |
| chr4 | 139519850 | 139519950 | 1072-Lng-A-T | 177  | chr4:139519850-139519950 |
| chr4 | 140033450 | 140033550 | 846-Lng-A-T  | 61   | chr4:140033450-140033550 |
| chr4 | 140956050 | 140956150 | 1188-Lng-A-T | 45   | chr4:140956050-140956150 |

**Table S2: SB Insertion regions**

|      |           |           |              |      |                          |
|------|-----------|-----------|--------------|------|--------------------------|
| chr4 | 141038050 | 141038150 | 1152-Lng-A-T | 105  | chr4:141038050-141038150 |
| chr4 | 141046250 | 141046350 | 901-Lng-C-T  | 44   | chr4:141046250-141046350 |
| chr4 | 141052150 | 141052250 | 1151-Lng-A-T | 1813 | chr4:141052150-141052250 |
| chr4 | 141064350 | 141064450 | 1152-Lng-A-T | 163  | chr4:141064350-141064450 |
| chr4 | 141270850 | 141270950 | 1065-Lng-B-T | 94   | chr4:141270850-141270950 |
| chr4 | 141271350 | 141271450 | 1274-Lng-A-T | 114  | chr4:141271350-141271450 |
| chr4 | 141511650 | 141511750 | 1151-Lng-A-T | 125  | chr4:141511650-141511750 |
| chr4 | 141529550 | 141529650 | 1065-Lng-B-T | 42   | chr4:141529550-141529650 |
| chr4 | 141579350 | 141579450 | 1223-Lng-A-T | 111  | chr4:141579350-141579450 |
| chr4 | 141590950 | 141591050 | 1223-Lng-B-T | 40   | chr4:141590950-141591050 |
| chr4 | 141628850 | 141628950 | 1072-Lng-A-T | 79   | chr4:141628850-141628950 |
| chr4 | 141876750 | 141876850 | 1065-Lng-C-T | 66   | chr4:141876750-141876850 |
| chr4 | 142143350 | 142143450 | 1223-Lng-B-T | 183  | chr4:142143350-142143450 |
| chr4 | 142509850 | 142509950 | 846-Lng-A-T  | 77   | chr4:142509850-142509950 |
| chr4 | 142514650 | 142514750 | 1072-Lng-A-T | 54   | chr4:142514650-142514750 |
| chr4 | 142650850 | 142650950 | 1152-Lng-A-T | 49   | chr4:142650850-142650950 |
| chr4 | 142699650 | 142699750 | 1065-Lng-C-T | 61   | chr4:142699650-142699750 |
| chr4 | 142743050 | 142743150 | 1152-Lng-A-T | 39   | chr4:142743050-142743150 |
| chr4 | 142744850 | 142744950 | 1167-Lng-A-T | 175  | chr4:142744850-142744950 |
| chr4 | 142879050 | 142879150 | 846-Lng-A-T  | 66   | chr4:142879050-142879150 |
| chr4 | 142978450 | 142978550 | 1152-Lng-A-T | 205  | chr4:142978450-142978550 |
| chr4 | 143035150 | 143035250 | 1065-Lng-B-T | 55   | chr4:143035150-143035250 |
| chr4 | 143786850 | 143786950 | 1065-Lng-C-T | 87   | chr4:143786850-143786950 |
| chr4 | 143876250 | 143876350 | 1065-Lng-C-T | 82   | chr4:143876250-143876350 |
| chr4 | 144026550 | 144026650 | 1065-Lng-C-T | 72   | chr4:144026550-144026650 |
| chr4 | 144035050 | 144035150 | 1065-Lng-A-T | 56   | chr4:144035050-144035150 |
| chr4 | 144069350 | 144069450 | 1090-Lng-A-T | 77   | chr4:144069350-144069450 |
| chr4 | 144232950 | 144233050 | 1152-Lng-A-T | 79   | chr4:144232950-144233050 |
| chr4 | 144340850 | 144340950 | 1065-Lng-B-T | 49   | chr4:144340850-144340950 |
| chr4 | 144489350 | 144489450 | 1223-Lng-B-T | 46   | chr4:144489350-144489450 |
| chr4 | 144515850 | 144515950 | 1152-Lng-A-T | 103  | chr4:144515850-144515950 |
| chr4 | 144516650 | 144516750 | 1188-Lng-A-T | 50   | chr4:144516650-144516750 |
| chr4 | 144598750 | 144598850 | 1090-Lng-A-T | 68   | chr4:144598750-144598850 |
| chr4 | 144608350 | 144608450 | 901-Lng-A-T  | 128  | chr4:144608350-144608450 |
| chr4 | 144682950 | 144683050 | 1223-Lng-B-T | 78   | chr4:144682950-144683050 |
| chr4 | 144685350 | 144685450 | 1065-Lng-C-T | 77   | chr4:144685350-144685450 |
| chr4 | 144703350 | 144703450 | 1274-Lng-A-T | 164  | chr4:144703350-144703450 |
| chr4 | 144719250 | 144719350 | 1223-Lng-B-T | 249  | chr4:144719250-144719350 |
| chr4 | 144721950 | 144722050 | 1065-Lng-A-T | 35   | chr4:144721950-144722050 |
| chr4 | 144737950 | 144738050 | 901-Lng-B-T  | 178  | chr4:144737950-144738050 |
| chr4 | 144743050 | 144743150 | 1004-Lng-A-T | 90   | chr4:144743050-144743150 |
| chr4 | 144828450 | 144828550 | 1188-Lng-A-T | 73   | chr4:144828450-144828550 |
| chr4 | 144876850 | 144876950 | 1090-Lng-B-T | 764  | chr4:144876850-144876950 |
| chr4 | 145431150 | 145431250 | 1004-Lng-A-T | 82   | chr4:145431150-145431250 |
| chr4 | 145675850 | 145675950 | 1004-Lng-A-T | 67   | chr4:145675850-145675950 |
| chr4 | 145717850 | 145717950 | 1004-Lng-A-T | 94   | chr4:145717850-145717950 |

**Table S2: SB Insertion regions**

|      |           |           |              |     |                          |
|------|-----------|-----------|--------------|-----|--------------------------|
| chr4 | 145719450 | 145719550 | 1090-Lng-A-T | 69  | chr4:145719450-145719550 |
| chr4 | 145733150 | 145733250 | 1100-Lng-A-T | 64  | chr4:145733150-145733250 |
| chr4 | 145743650 | 145743750 | 1004-Lng-A-T | 600 | chr4:145743650-145743750 |
| chr4 | 146315750 | 146315850 | 1188-Lng-A-T | 90  | chr4:146315750-146315850 |
| chr4 | 146570150 | 146570250 | 901-Lng-D-T  | 290 | chr4:146570150-146570250 |
| chr4 | 146614950 | 146615050 | 1151-Lng-A-T | 195 | chr4:146614950-146615050 |
| chr4 | 146714550 | 146714650 | 1188-Lng-A-T | 140 | chr4:146714550-146714650 |
| chr4 | 146802250 | 146802350 | 1152-Lng-A-T | 279 | chr4:146802250-146802350 |
| chr4 | 146851350 | 146851450 | 1274-Lng-A-T | 64  | chr4:146851350-146851450 |
| chr4 | 146871850 | 146871950 | 1072-Lng-A-T | 52  | chr4:146871850-146871950 |
| chr4 | 146890250 | 146890350 | 1188-Lng-A-T | 82  | chr4:146890250-146890350 |
| chr4 | 146986550 | 146986650 | 1090-Lng-B-T | 809 | chr4:146986550-146986650 |
| chr4 | 147184450 | 147184550 | 1100-Lng-B-T | 71  | chr4:147184450-147184550 |
| chr4 | 147194850 | 147194950 | 1223-Lng-B-T | 54  | chr4:147194850-147194950 |
| chr4 | 147203650 | 147203750 | 1152-Lng-A-T | 107 | chr4:147203650-147203750 |
| chr4 | 147228950 | 147229050 | 1223-Lng-A-T | 152 | chr4:147228950-147229050 |
| chr4 | 147252450 | 147252550 | 1223-Lng-B-T | 61  | chr4:147252450-147252550 |
| chr4 | 147262250 | 147262350 | 1065-Lng-C-T | 67  | chr4:147262250-147262350 |
| chr4 | 147263250 | 147263350 | 1100-Lng-B-T | 301 | chr4:147263250-147263350 |
| chr4 | 147269450 | 147269550 | 1090-Lng-A-T | 127 | chr4:147269450-147269550 |
| chr4 | 147317750 | 147317850 | 1151-Lng-A-T | 63  | chr4:147317750-147317850 |
| chr4 | 147350550 | 147350650 | 1072-Lng-A-T | 57  | chr4:147350550-147350650 |
| chr4 | 147400150 | 147400250 | 1152-Lng-A-T | 102 | chr4:147400150-147400250 |
| chr4 | 147400250 | 147400350 | 1065-Lng-A-T | 87  | chr4:147400250-147400350 |
| chr4 | 147706050 | 147706150 | 1152-Lng-A-T | 44  | chr4:147706050-147706150 |
| chr4 | 147846850 | 147846950 | 1090-Lng-A-T | 55  | chr4:147846850-147846950 |
| chr4 | 147957950 | 147958050 | 901-Lng-A-T  | 100 | chr4:147957950-147958050 |
| chr4 | 147960450 | 147960550 | 1100-Lng-A-T | 52  | chr4:147960450-147960550 |
| chr4 | 147981450 | 147981550 | 1065-Lng-A-T | 98  | chr4:147981450-147981550 |
| chr4 | 148000050 | 148000150 | 1090-Lng-A-T | 74  | chr4:148000050-148000150 |
| chr4 | 148197250 | 148197350 | 1151-Lng-A-T | 424 | chr4:148197250-148197350 |
| chr4 | 148213750 | 148213850 | 1100-Lng-A-T | 103 | chr4:148213750-148213850 |
| chr4 | 148345650 | 148345750 | 1223-Lng-B-T | 45  | chr4:148345650-148345750 |
| chr4 | 148353350 | 148353450 | 1100-Lng-A-T | 58  | chr4:148353350-148353450 |
| chr4 | 148385750 | 148385850 | 1004-Lng-A-T | 102 | chr4:148385750-148385850 |
| chr4 | 148447750 | 148447850 | 1090-Lng-A-T | 62  | chr4:148447750-148447850 |
| chr4 | 148487750 | 148487850 | 1100-Lng-B-T | 53  | chr4:148487750-148487850 |
| chr4 | 148560450 | 148560550 | 1188-Lng-A-T | 219 | chr4:148560450-148560550 |
| chr4 | 148571550 | 148571650 | 901-Lng-D-T  | 46  | chr4:148571550-148571650 |
| chr4 | 148645750 | 148645850 | 1152-Lng-A-T | 62  | chr4:148645750-148645850 |
| chr4 | 148666450 | 148666550 | 1167-Lng-A-T | 61  | chr4:148666450-148666550 |
| chr4 | 148683950 | 148684050 | 846-Lng-A-T  | 56  | chr4:148683950-148684050 |
| chr4 | 148730450 | 148730550 | 1188-Lng-A-T | 34  | chr4:148730450-148730550 |
| chr4 | 148731450 | 148731550 | 1090-Lng-B-T | 404 | chr4:148731450-148731550 |
| chr4 | 148795150 | 148795250 | 1223-Lng-B-T | 41  | chr4:148795150-148795250 |
| chr4 | 148796150 | 148796250 | 1274-Lng-A-T | 105 | chr4:148796150-148796250 |



**Table S2: SB Insertion regions**

|      |           |           |              |     |                          |
|------|-----------|-----------|--------------|-----|--------------------------|
| chr4 | 148977850 | 148977950 | 901-Lng-A-T  | 71  | chr4:148977850-148977950 |
| chr4 | 149132750 | 149132850 | 1152-Lng-A-T | 47  | chr4:149132750-149132850 |
| chr4 | 149138950 | 149139050 | 1090-Lng-A-T | 46  | chr4:149138950-149139050 |
| chr4 | 149254450 | 149254550 | 1065-Lng-C-T | 76  | chr4:149254450-149254550 |
| chr4 | 149291350 | 149291450 | 1274-Lng-A-T | 58  | chr4:149291350-149291450 |
| chr4 | 149360950 | 149361050 | 1004-Lng-A-T | 75  | chr4:149360950-149361050 |
| chr4 | 149361750 | 149361850 | 1100-Lng-A-T | 85  | chr4:149361750-149361850 |
| chr4 | 149398650 | 149398750 | 1100-Lng-A-T | 141 | chr4:149398650-149398750 |
| chr4 | 149529750 | 149529850 | 1065-Lng-C-T | 75  | chr4:149529750-149529850 |
| chr4 | 149587250 | 149587350 | 1100-Lng-B-T | 79  | chr4:149587250-149587350 |
| chr4 | 149683750 | 149683850 | 1151-Lng-A-T | 471 | chr4:149683750-149683850 |
| chr4 | 149787150 | 149787250 | 901-Lng-D-T  | 217 | chr4:149787150-149787250 |
| chr4 | 149804850 | 149804950 | 1274-Lng-A-T | 86  | chr4:149804850-149804950 |
| chr4 | 149822150 | 149822250 | 1072-Lng-A-T | 158 | chr4:149822150-149822250 |
| chr4 | 149837450 | 149837550 | 1100-Lng-A-T | 136 | chr4:149837450-149837550 |
| chr4 | 149905450 | 149905550 | 901-Lng-C-T  | 31  | chr4:149905450-149905550 |
| chr4 | 149921750 | 149921850 | 1100-Lng-A-T | 111 | chr4:149921750-149921850 |
| chr4 | 149931650 | 149931750 | 901-Lng-B-T  | 185 | chr4:149931650-149931750 |
| chr4 | 149963450 | 149963550 | 1100-Lng-B-T | 53  | chr4:149963450-149963550 |
| chr4 | 150005850 | 150005950 | 1090-Lng-A-T | 48  | chr4:150005850-150005950 |
| chr4 | 150232250 | 150232350 | 1223-Lng-A-T | 92  | chr4:150232250-150232350 |
| chr4 | 150350350 | 150350450 | 1072-Lng-A-T | 168 | chr4:150350350-150350450 |
| chr4 | 150908050 | 150908150 | 1065-Lng-C-T | 63  | chr4:150908050-150908150 |
| chr4 | 151142250 | 151142350 | 1188-Lng-A-T | 77  | chr4:151142250-151142350 |
| chr4 | 151160150 | 151160250 | 1004-Lng-A-T | 52  | chr4:151160150-151160250 |
| chr4 | 151175150 | 151175250 | 1152-Lng-A-T | 101 | chr4:151175150-151175250 |
| chr4 | 151204950 | 151205050 | 1100-Lng-A-T | 121 | chr4:151204950-151205050 |
| chr4 | 151214750 | 151214850 | 1188-Lng-A-T | 43  | chr4:151214750-151214850 |
| chr4 | 151319150 | 151319250 | 1223-Lng-D-T | 118 | chr4:151319150-151319250 |
| chr4 | 151384150 | 151384250 | 1100-Lng-A-T | 162 | chr4:151384150-151384250 |
| chr4 | 151385850 | 151385950 | 1188-Lng-A-T | 74  | chr4:151385850-151385950 |
| chr4 | 151418050 | 151418150 | 1223-Lng-D-T | 44  | chr4:151418050-151418150 |
| chr4 | 151558150 | 151558250 | 1151-Lng-A-T | 57  | chr4:151558150-151558250 |
| chr4 | 151566450 | 151566550 | 1223-Lng-B-T | 51  | chr4:151566450-151566550 |
| chr4 | 151703550 | 151703650 | 1151-Lng-A-T | 60  | chr4:151703550-151703650 |
| chr4 | 151973750 | 151973850 | 901-Lng-B-T  | 140 | chr4:151973750-151973850 |
| chr4 | 152054250 | 152054350 | 1274-Lng-A-T | 82  | chr4:152054250-152054350 |
| chr4 | 152306550 | 152306650 | 1072-Lng-A-T | 60  | chr4:152306550-152306650 |
| chr4 | 152384550 | 152384650 | 901-Lng-A-T  | 185 | chr4:152384550-152384650 |
| chr4 | 152547050 | 152547150 | 1152-Lng-A-T | 102 | chr4:152547050-152547150 |
| chr4 | 152642450 | 152642550 | 1100-Lng-A-T | 62  | chr4:152642450-152642550 |
| chr4 | 153387650 | 153387750 | 1100-Lng-B-T | 56  | chr4:153387650-153387750 |
| chr4 | 153520450 | 153520550 | 901-Lng-B-T  | 144 | chr4:153520450-153520550 |
| chr4 | 153589450 | 153589550 | 1274-Lng-A-T | 72  | chr4:153589450-153589550 |
| chr4 | 153608750 | 153608850 | 1065-Lng-A-T | 86  | chr4:153608750-153608850 |
| chr4 | 153744350 | 153744450 | 1004-Lng-A-T | 84  | chr4:153744350-153744450 |

**Table S2: SB Insertion regions**

|      |           |           |              |      |                          |
|------|-----------|-----------|--------------|------|--------------------------|
| chr4 | 153766950 | 153767050 | 1004-Lng-A-T | 64   | chr4:153766950-153767050 |
| chr4 | 153790550 | 153790650 | 1065-Lng-A-T | 113  | chr4:153790550-153790650 |
| chr4 | 153830150 | 153830250 | 1223-Lng-A-T | 117  | chr4:153830150-153830250 |
| chr4 | 153861350 | 153861450 | 1274-Lng-A-T | 65   | chr4:153861350-153861450 |
| chr4 | 153990150 | 153990250 | 1090-Lng-A-T | 82   | chr4:153990150-153990250 |
| chr4 | 154294750 | 154294850 | 1090-Lng-A-T | 57   | chr4:154294750-154294850 |
| chr4 | 154402650 | 154402750 | 1100-Lng-A-T | 3241 | chr4:154402650-154402750 |
| chr4 | 154448250 | 154448350 | 1065-Lng-A-T | 61   | chr4:154448250-154448350 |
| chr4 | 154455950 | 154456050 | 901-Lng-C-T  | 86   | chr4:154455950-154456050 |
| chr4 | 154512350 | 154512450 | 1152-Lng-A-T | 32   | chr4:154512350-154512450 |
| chr4 | 154676350 | 154676450 | 1090-Lng-A-T | 51   | chr4:154676350-154676450 |
| chr4 | 154698650 | 154698750 | 1223-Lng-C-T | 77   | chr4:154698650-154698750 |
| chr4 | 154701650 | 154701750 | 1274-Lng-A-T | 75   | chr4:154701650-154701750 |
| chr4 | 154704050 | 154704150 | 901-Lng-A-T  | 322  | chr4:154704050-154704150 |
| chr4 | 154747750 | 154747850 | 1100-Lng-A-T | 78   | chr4:154747750-154747850 |
| chr4 | 154889650 | 154889750 | 1223-Lng-C-T | 60   | chr4:154889650-154889750 |
| chr4 | 154901250 | 154901350 | 1223-Lng-C-T | 58   | chr4:154901250-154901350 |
| chr4 | 154907250 | 154907350 | 901-Lng-A-T  | 91   | chr4:154907250-154907350 |
| chr4 | 154929750 | 154929850 | 1100-Lng-A-T | 68   | chr4:154929750-154929850 |
| chr4 | 154940850 | 154940950 | 1065-Lng-C-T | 79   | chr4:154940850-154940950 |
| chr4 | 154967250 | 154967350 | 1100-Lng-A-T | 57   | chr4:154967250-154967350 |
| chr4 | 154991450 | 154991550 | 901-Lng-C-T  | 83   | chr4:154991450-154991550 |
| chr4 | 154995050 | 154995150 | 1151-Lng-A-T | 248  | chr4:154995050-154995150 |
| chr4 | 155015450 | 155015550 | 1223-Lng-A-T | 112  | chr4:155015450-155015550 |
| chr4 | 155193450 | 155193550 | 1100-Lng-A-T | 82   | chr4:155193450-155193550 |
| chr4 | 155224550 | 155224650 | 901-Lng-A-T  | 54   | chr4:155224550-155224650 |
| chr4 | 155321250 | 155321350 | 901-Lng-C-T  | 44   | chr4:155321250-155321350 |
| chr4 | 155327450 | 155327550 | 846-Lng-A-T  | 119  | chr4:155327450-155327550 |
| chr4 | 155334450 | 155334550 | 1151-Lng-A-T | 148  | chr4:155334450-155334550 |
| chr4 | 155337850 | 155337950 | 1223-Lng-C-T | 82   | chr4:155337850-155337950 |
| chr4 | 155405350 | 155405450 | 901-Lng-A-T  | 116  | chr4:155405350-155405450 |
| chr4 | 155413350 | 155413450 | 1223-Lng-D-T | 49   | chr4:155413350-155413450 |
| chr4 | 155426850 | 155426950 | 1151-Lng-A-T | 68   | chr4:155426850-155426950 |
| chr4 | 155431150 | 155431250 | 1151-Lng-A-T | 185  | chr4:155431150-155431250 |
| chr4 | 155590150 | 155590250 | 1090-Lng-A-T | 87   | chr4:155590150-155590250 |
| chr5 | 3079850   | 3079950   | 1065-Lng-C-T | 108  | chr5:3079850-3079950     |
| chr5 | 3144650   | 3144750   | 1090-Lng-B-T | 267  | chr5:3144650-3144750     |
| chr5 | 3419450   | 3419550   | 1072-Lng-A-T | 49   | chr5:3419450-3419550     |
| chr5 | 3556150   | 3556250   | 1065-Lng-B-T | 328  | chr5:3556150-3556250     |
| chr5 | 3564850   | 3564950   | 1223-Lng-B-T | 836  | chr5:3564850-3564950     |
| chr5 | 3606450   | 3606550   | 1065-Lng-A-T | 43   | chr5:3606450-3606550     |
| chr5 | 4016750   | 4016850   | 901-Lng-C-T  | 86   | chr5:4016750-4016850     |
| chr5 | 4682950   | 4683050   | 1274-Lng-A-T | 50   | chr5:4682950-4683050     |
| chr5 | 4815550   | 4815650   | 901-Lng-A-T  | 119  | chr5:4815550-4815650     |
| chr5 | 4854450   | 4854550   | 1065-Lng-B-T | 50   | chr5:4854450-4854550     |
| chr5 | 4863250   | 4863350   | 1072-Lng-A-T | 83   | chr5:4863250-4863350     |

**Table S2: SB Insertion regions**

|      |         |         |              |      |                      |
|------|---------|---------|--------------|------|----------------------|
| chr5 | 5020050 | 5020150 | 1090-Lng-A-T | 82   | chr5:5020050-5020150 |
| chr5 | 5031750 | 5031850 | 1152-Lng-A-T | 101  | chr5:5031750-5031850 |
| chr5 | 5088150 | 5088250 | 1065-Lng-B-T | 87   | chr5:5088150-5088250 |
| chr5 | 5102850 | 5102950 | 901-Lng-A-T  | 56   | chr5:5102850-5102950 |
| chr5 | 5106350 | 5106450 | 1065-Lng-B-T | 40   | chr5:5106350-5106450 |
| chr5 | 5146150 | 5146250 | 1065-Lng-B-T | 59   | chr5:5146150-5146250 |
| chr5 | 5220550 | 5220650 | 1090-Lng-A-T | 53   | chr5:5220550-5220650 |
| chr5 | 5247650 | 5247750 | 901-Lng-A-T  | 54   | chr5:5247650-5247750 |
| chr5 | 5300650 | 5300750 | 1100-Lng-B-T | 52   | chr5:5300650-5300750 |
| chr5 | 5303950 | 5304050 | 1188-Lng-A-T | 47   | chr5:5303950-5304050 |
| chr5 | 5835850 | 5835950 | 901-Lng-B-T  | 79   | chr5:5835850-5835950 |
| chr5 | 6134950 | 6135050 | 1223-Lng-A-T | 155  | chr5:6134950-6135050 |
| chr5 | 6384750 | 6384850 | 1065-Lng-C-T | 63   | chr5:6384750-6384850 |
| chr5 | 6537150 | 6537250 | 1072-Lng-A-T | 65   | chr5:6537150-6537250 |
| chr5 | 6715650 | 6715750 | 1065-Lng-C-T | 1519 | chr5:6715650-6715750 |
| chr5 | 6777550 | 6777650 | 1152-Lng-A-T | 54   | chr5:6777550-6777650 |
| chr5 | 6784350 | 6784450 | 901-Lng-B-T  | 223  | chr5:6784350-6784450 |
| chr5 | 6887750 | 6887850 | 901-Lng-B-T  | 293  | chr5:6887750-6887850 |
| chr5 | 6935450 | 6935550 | 1090-Lng-A-T | 73   | chr5:6935450-6935550 |
| chr5 | 6965150 | 6965250 | 1004-Lng-A-T | 249  | chr5:6965150-6965250 |
| chr5 | 7021450 | 7021550 | 1065-Lng-B-T | 80   | chr5:7021450-7021550 |
| chr5 | 7214550 | 7214650 | 846-Lng-A-T  | 211  | chr5:7214550-7214650 |
| chr5 | 7290650 | 7290750 | 1090-Lng-A-T | 68   | chr5:7290650-7290750 |
| chr5 | 7580950 | 7581050 | 1072-Lng-A-T | 261  | chr5:7580950-7581050 |
| chr5 | 7875550 | 7875650 | 1274-Lng-A-T | 102  | chr5:7875550-7875650 |
| chr5 | 7889450 | 7889550 | 1090-Lng-A-T | 88   | chr5:7889450-7889550 |
| chr5 | 8062150 | 8062250 | 1090-Lng-A-T | 70   | chr5:8062150-8062250 |
| chr5 | 8144350 | 8144450 | 846-Lng-A-T  | 147  | chr5:8144350-8144450 |
| chr5 | 8226850 | 8226950 | 1188-Lng-A-T | 52   | chr5:8226850-8226950 |
| chr5 | 8351950 | 8352050 | 1004-Lng-A-T | 68   | chr5:8351950-8352050 |
| chr5 | 8394550 | 8394650 | 846-Lng-A-T  | 184  | chr5:8394550-8394650 |
| chr5 | 8618650 | 8618750 | 1188-Lng-A-T | 39   | chr5:8618650-8618750 |
| chr5 | 8630850 | 8630950 | 846-Lng-A-T  | 160  | chr5:8630850-8630950 |
| chr5 | 8721250 | 8721350 | 1065-Lng-B-T | 39   | chr5:8721250-8721350 |
| chr5 | 8919550 | 8919650 | 1065-Lng-A-T | 85   | chr5:8919550-8919650 |
| chr5 | 8968850 | 8968950 | 1072-Lng-A-T | 103  | chr5:8968850-8968950 |
| chr5 | 8977450 | 8977550 | 1152-Lng-A-T | 94   | chr5:8977450-8977550 |
| chr5 | 9073850 | 9073950 | 1188-Lng-A-T | 65   | chr5:9073850-9073950 |
| chr5 | 9075950 | 9076050 | 1065-Lng-A-T | 88   | chr5:9075950-9076050 |
| chr5 | 9129550 | 9129650 | 1223-Lng-B-T | 37   | chr5:9129550-9129650 |
| chr5 | 9170250 | 9170350 | 1274-Lng-A-T | 215  | chr5:9170250-9170350 |
| chr5 | 9173750 | 9173850 | 1223-Lng-B-T | 43   | chr5:9173750-9173850 |
| chr5 | 9201550 | 9201650 | 1152-Lng-A-T | 48   | chr5:9201550-9201650 |
| chr5 | 9266950 | 9267050 | 1100-Lng-A-T | 90   | chr5:9266950-9267050 |
| chr5 | 9292950 | 9293050 | 1090-Lng-A-T | 61   | chr5:9292950-9293050 |
| chr5 | 9386250 | 9386350 | 1090-Lng-A-T | 55   | chr5:9386250-9386350 |

**Table S2: SB Insertion regions**

|      |          |          |              |     |                        |
|------|----------|----------|--------------|-----|------------------------|
| chr5 | 9389350  | 9389450  | 1223-Lng-C-T | 49  | chr5:9389350-9389450   |
| chr5 | 9471150  | 9471250  | 1065-Lng-A-T | 40  | chr5:9471150-9471250   |
| chr5 | 9486550  | 9486650  | 1065-Lng-C-T | 201 | chr5:9486550-9486650   |
| chr5 | 9530450  | 9530550  | 846-Lng-A-T  | 283 | chr5:9530450-9530550   |
| chr5 | 9733050  | 9733150  | 1065-Lng-A-T | 63  | chr5:9733050-9733150   |
| chr5 | 9802150  | 9802250  | 846-Lng-A-T  | 175 | chr5:9802150-9802250   |
| chr5 | 9987350  | 9987450  | 1274-Lng-A-T | 60  | chr5:9987350-9987450   |
| chr5 | 10060150 | 10060250 | 846-Lng-A-T  | 104 | chr5:10060150-10060250 |
| chr5 | 10070350 | 10070450 | 1100-Lng-A-T | 105 | chr5:10070350-10070450 |
| chr5 | 10317950 | 10318050 | 901-Lng-C-T  | 126 | chr5:10317950-10318050 |
| chr5 | 10318150 | 10318250 | 1223-Lng-C-T | 51  | chr5:10318150-10318250 |
| chr5 | 10442150 | 10442250 | 1004-Lng-A-T | 89  | chr5:10442150-10442250 |
| chr5 | 10478350 | 10478450 | 1065-Lng-A-T | 58  | chr5:10478350-10478450 |
| chr5 | 11952450 | 11952550 | 1188-Lng-A-T | 34  | chr5:11952450-11952550 |
| chr5 | 12375150 | 12375250 | 1274-Lng-A-T | 73  | chr5:12375150-12375250 |
| chr5 | 12430050 | 12430150 | 1223-Lng-C-T | 56  | chr5:12430050-12430150 |
| chr5 | 12496850 | 12496950 | 1274-Lng-A-T | 57  | chr5:12496850-12496950 |
| chr5 | 12587950 | 12588050 | 901-Lng-C-T  | 35  | chr5:12587950-12588050 |
| chr5 | 12616950 | 12617050 | 1274-Lng-A-T | 75  | chr5:12616950-12617050 |
| chr5 | 12652250 | 12652350 | 901-Lng-B-T  | 92  | chr5:12652250-12652350 |
| chr5 | 12842650 | 12842750 | 1090-Lng-A-T | 152 | chr5:12842650-12842750 |
| chr5 | 12997850 | 12997950 | 1151-Lng-A-T | 81  | chr5:12997850-12997950 |
| chr5 | 13040750 | 13040850 | 901-Lng-A-T  | 71  | chr5:13040750-13040850 |
| chr5 | 13138150 | 13138250 | 1090-Lng-A-T | 53  | chr5:13138150-13138250 |
| chr5 | 13291150 | 13291250 | 901-Lng-B-T  | 135 | chr5:13291150-13291250 |
| chr5 | 13357150 | 13357250 | 846-Lng-A-T  | 93  | chr5:13357150-13357250 |
| chr5 | 13555050 | 13555150 | 1072-Lng-A-T | 177 | chr5:13555050-13555150 |
| chr5 | 13586850 | 13586950 | 1090-Lng-A-T | 47  | chr5:13586850-13586950 |
| chr5 | 13707250 | 13707350 | 1274-Lng-A-T | 65  | chr5:13707250-13707350 |
| chr5 | 14040150 | 14040250 | 1152-Lng-A-T | 147 | chr5:14040150-14040250 |
| chr5 | 14053850 | 14053950 | 1004-Lng-A-T | 55  | chr5:14053850-14053950 |
| chr5 | 14246150 | 14246250 | 1223-Lng-A-T | 75  | chr5:14246150-14246250 |
| chr5 | 14454150 | 14454250 | 1065-Lng-C-T | 100 | chr5:14454150-14454250 |
| chr5 | 14573850 | 14573950 | 901-Lng-D-T  | 42  | chr5:14573850-14573950 |
| chr5 | 14960950 | 14961050 | 1065-Lng-A-T | 43  | chr5:14960950-14961050 |
| chr5 | 14962250 | 14962350 | 1223-Lng-D-T | 53  | chr5:14962250-14962350 |
| chr5 | 14997750 | 14997850 | 1072-Lng-A-T | 110 | chr5:14997750-14997850 |
| chr5 | 15344150 | 15344250 | 1065-Lng-B-T | 48  | chr5:15344150-15344250 |
| chr5 | 15539150 | 15539250 | 1100-Lng-A-T | 127 | chr5:15539150-15539250 |
| chr5 | 15562950 | 15563050 | 1223-Lng-A-T | 52  | chr5:15562950-15563050 |
| chr5 | 15669450 | 15669550 | 1004-Lng-A-T | 55  | chr5:15669450-15669550 |
| chr5 | 15841550 | 15841650 | 901-Lng-D-T  | 518 | chr5:15841550-15841650 |
| chr5 | 15850950 | 15851050 | 901-Lng-C-T  | 346 | chr5:15850950-15851050 |
| chr5 | 16000450 | 16000550 | 1065-Lng-A-T | 78  | chr5:16000450-16000550 |
| chr5 | 16040450 | 16040550 | 1274-Lng-A-T | 55  | chr5:16040450-16040550 |
| chr5 | 16041650 | 16041750 | 1274-Lng-A-T | 70  | chr5:16041650-16041750 |

**Table S2: SB Insertion regions**

|      |          |          |              |      |                        |
|------|----------|----------|--------------|------|------------------------|
| chr5 | 16534850 | 16534950 | 1223-Lng-B-T | 45   | chr5:16534850-16534950 |
| chr5 | 16969150 | 16969250 | 1004-Lng-A-T | 149  | chr5:16969150-16969250 |
| chr5 | 16971550 | 16971650 | 1152-Lng-A-T | 203  | chr5:16971550-16971650 |
| chr5 | 17164550 | 17164650 | 1065-Lng-C-T | 112  | chr5:17164550-17164650 |
| chr5 | 17177450 | 17177550 | 1223-Lng-C-T | 53   | chr5:17177450-17177550 |
| chr5 | 17208250 | 17208350 | 1151-Lng-A-T | 171  | chr5:17208250-17208350 |
| chr5 | 17351050 | 17351150 | 1100-Lng-A-T | 120  | chr5:17351050-17351150 |
| chr5 | 17562650 | 17562750 | 1072-Lng-A-T | 119  | chr5:17562650-17562750 |
| chr5 | 17621050 | 17621150 | 1223-Lng-D-T | 100  | chr5:17621050-17621150 |
| chr5 | 17776350 | 17776450 | 1004-Lng-A-T | 315  | chr5:17776350-17776450 |
| chr5 | 17793250 | 17793350 | 1223-Lng-A-T | 70   | chr5:17793250-17793350 |
| chr5 | 17979950 | 17980050 | 1100-Lng-A-T | 136  | chr5:17979950-17980050 |
| chr5 | 18032150 | 18032250 | 1152-Lng-A-T | 79   | chr5:18032150-18032250 |
| chr5 | 18060250 | 18060350 | 901-Lng-A-T  | 190  | chr5:18060250-18060350 |
| chr5 | 18096450 | 18096550 | 1223-Lng-B-T | 36   | chr5:18096450-18096550 |
| chr5 | 18219350 | 18219450 | 901-Lng-B-T  | 234  | chr5:18219350-18219450 |
| chr5 | 18278750 | 18278850 | 901-Lng-B-T  | 199  | chr5:18278750-18278850 |
| chr5 | 18494050 | 18494150 | 1090-Lng-A-T | 98   | chr5:18494050-18494150 |
| chr5 | 18623050 | 18623150 | 1090-Lng-A-T | 83   | chr5:18623050-18623150 |
| chr5 | 18789750 | 18789850 | 1223-Lng-A-T | 154  | chr5:18789750-18789850 |
| chr5 | 18937350 | 18937450 | 901-Lng-A-T  | 50   | chr5:18937350-18937450 |
| chr5 | 18958450 | 18958550 | 1065-Lng-C-T | 71   | chr5:18958450-18958550 |
| chr5 | 19179350 | 19179450 | 1274-Lng-A-T | 98   | chr5:19179350-19179450 |
| chr5 | 19223250 | 19223350 | 1274-Lng-A-T | 65   | chr5:19223250-19223350 |
| chr5 | 19264950 | 19265050 | 1223-Lng-A-T | 305  | chr5:19264950-19265050 |
| chr5 | 19306250 | 19306350 | 901-Lng-A-T  | 119  | chr5:19306250-19306350 |
| chr5 | 19523050 | 19523150 | 901-Lng-A-T  | 58   | chr5:19523050-19523150 |
| chr5 | 19778050 | 19778150 | 901-Lng-A-T  | 262  | chr5:19778050-19778150 |
| chr5 | 19915350 | 19915450 | 901-Lng-A-T  | 70   | chr5:19915350-19915450 |
| chr5 | 19928450 | 19928550 | 1223-Lng-B-T | 40   | chr5:19928450-19928550 |
| chr5 | 19931250 | 19931350 | 1223-Lng-C-T | 58   | chr5:19931250-19931350 |
| chr5 | 20061250 | 20061350 | 1188-Lng-A-T | 40   | chr5:20061250-20061350 |
| chr5 | 20138250 | 20138350 | 1072-Lng-A-T | 51   | chr5:20138250-20138350 |
| chr5 | 20345550 | 20345650 | 1065-Lng-C-T | 79   | chr5:20345550-20345650 |
| chr5 | 20395750 | 20395850 | 1223-Lng-C-T | 727  | chr5:20395750-20395850 |
| chr5 | 20423750 | 20423850 | 901-Lng-A-T  | 56   | chr5:20423750-20423850 |
| chr5 | 20438750 | 20438850 | 1100-Lng-B-T | 64   | chr5:20438750-20438850 |
| chr5 | 20440350 | 20440450 | 1090-Lng-A-T | 88   | chr5:20440350-20440450 |
| chr5 | 20523650 | 20523750 | 1274-Lng-A-T | 63   | chr5:20523650-20523750 |
| chr5 | 20535250 | 20535350 | 1100-Lng-A-T | 323  | chr5:20535250-20535350 |
| chr5 | 20537250 | 20537350 | 1167-Lng-A-T | 106  | chr5:20537250-20537350 |
| chr5 | 20547850 | 20547950 | 1274-Lng-A-T | 79   | chr5:20547850-20547950 |
| chr5 | 20553850 | 20553950 | 1152-Lng-A-T | 93   | chr5:20553850-20553950 |
| chr5 | 20558550 | 20558650 | 1072-Lng-A-T | 130  | chr5:20558550-20558650 |
| chr5 | 20641450 | 20641550 | 1072-Lng-A-T | 126  | chr5:20641450-20641550 |
| chr5 | 20723250 | 20723350 | 1100-Lng-B-T | 5918 | chr5:20723250-20723350 |

**Table S2: SB Insertion regions**

|      |          |          |              |      |                        |
|------|----------|----------|--------------|------|------------------------|
| chr5 | 20733650 | 20733750 | 1100-Lng-A-T | 136  | chr5:20733650-20733750 |
| chr5 | 20764150 | 20764250 | 1151-Lng-A-T | 54   | chr5:20764150-20764250 |
| chr5 | 20903350 | 20903450 | 846-Lng-A-T  | 46   | chr5:20903350-20903450 |
| chr5 | 20962250 | 20962350 | 1223-Lng-A-T | 95   | chr5:20962250-20962350 |
| chr5 | 21030550 | 21030650 | 1065-Lng-B-T | 77   | chr5:21030550-21030650 |
| chr5 | 21216850 | 21216950 | 901-Lng-A-T  | 120  | chr5:21216850-21216950 |
| chr5 | 21666150 | 21666250 | 901-Lng-C-T  | 56   | chr5:21666150-21666250 |
| chr5 | 21941450 | 21941550 | 1274-Lng-A-T | 75   | chr5:21941450-21941550 |
| chr5 | 22168750 | 22168850 | 1065-Lng-B-T | 86   | chr5:22168750-22168850 |
| chr5 | 22277650 | 22277750 | 1090-Lng-A-T | 46   | chr5:22277650-22277750 |
| chr5 | 22291750 | 22291850 | 901-Lng-C-T  | 44   | chr5:22291750-22291850 |
| chr5 | 22334250 | 22334350 | 1223-Lng-B-T | 45   | chr5:22334250-22334350 |
| chr5 | 22398250 | 22398350 | 1152-Lng-A-T | 306  | chr5:22398250-22398350 |
| chr5 | 22735250 | 22735350 | 1223-Lng-B-T | 53   | chr5:22735250-22735350 |
| chr5 | 22846350 | 22846450 | 901-Lng-A-T  | 73   | chr5:22846350-22846450 |
| chr5 | 22846350 | 22846450 | 846-Lng-A-T  | 67   | chr5:22846350-22846450 |
| chr5 | 22846350 | 22846450 | 901-Lng-D-T  | 39   | chr5:22846350-22846450 |
| chr5 | 22846350 | 22846450 | 1072-Lng-A-T | 51   | chr5:22846350-22846450 |
| chr5 | 22846350 | 22846450 | 901-Lng-C-T  | 29   | chr5:22846350-22846450 |
| chr5 | 22913550 | 22913650 | 1223-Lng-D-T | 59   | chr5:22913550-22913650 |
| chr5 | 22945750 | 22945850 | 1151-Lng-A-T | 292  | chr5:22945750-22945850 |
| chr5 | 22954550 | 22954650 | 1004-Lng-A-T | 171  | chr5:22954550-22954650 |
| chr5 | 22954550 | 22954650 | 1223-Lng-D-T | 115  | chr5:22954550-22954650 |
| chr5 | 22965250 | 22965350 | 1167-Lng-A-T | 57   | chr5:22965250-22965350 |
| chr5 | 22969650 | 22969750 | 1152-Lng-A-T | 82   | chr5:22969650-22969750 |
| chr5 | 22977850 | 22977950 | 1151-Lng-A-T | 292  | chr5:22977850-22977950 |
| chr5 | 23100050 | 23100150 | 901-Lng-B-T  | 57   | chr5:23100050-23100150 |
| chr5 | 23108950 | 23109050 | 1100-Lng-A-T | 79   | chr5:23108950-23109050 |
| chr5 | 23120550 | 23120650 | 1090-Lng-B-T | 1065 | chr5:23120550-23120650 |
| chr5 | 23122050 | 23122150 | 1151-Lng-A-T | 75   | chr5:23122050-23122150 |
| chr5 | 23139550 | 23139650 | 1152-Lng-A-T | 39   | chr5:23139550-23139650 |
| chr5 | 23177250 | 23177350 | 901-Lng-B-T  | 87   | chr5:23177250-23177350 |
| chr5 | 23287750 | 23287850 | 1274-Lng-A-T | 170  | chr5:23287750-23287850 |
| chr5 | 23298250 | 23298350 | 1072-Lng-A-T | 75   | chr5:23298250-23298350 |
| chr5 | 23304350 | 23304450 | 1065-Lng-C-T | 99   | chr5:23304350-23304450 |
| chr5 | 23481550 | 23481650 | 1223-Lng-C-T | 50   | chr5:23481550-23481650 |
| chr5 | 23508550 | 23508650 | 901-Lng-B-T  | 146  | chr5:23508550-23508650 |
| chr5 | 23521950 | 23522050 | 1167-Lng-A-T | 83   | chr5:23521950-23522050 |
| chr5 | 23997050 | 23997150 | 901-Lng-B-T  | 54   | chr5:23997050-23997150 |
| chr5 | 24294850 | 24294950 | 901-Lng-B-T  | 173  | chr5:24294850-24294950 |
| chr5 | 24323950 | 24324050 | 1188-Lng-A-T | 46   | chr5:24323950-24324050 |
| chr5 | 24336550 | 24336650 | 1072-Lng-A-T | 65   | chr5:24336550-24336650 |
| chr5 | 24337950 | 24338050 | 1100-Lng-A-T | 90   | chr5:24337950-24338050 |
| chr5 | 24337950 | 24338050 | 1223-Lng-C-T | 52   | chr5:24337950-24338050 |
| chr5 | 24461050 | 24461150 | 1004-Lng-A-T | 58   | chr5:24461050-24461150 |
| chr5 | 24809050 | 24809150 | 846-Lng-A-T  | 83   | chr5:24809050-24809150 |

**Table S2: SB Insertion regions**

|      |          |          |              |      |                        |
|------|----------|----------|--------------|------|------------------------|
| chr5 | 24894850 | 24894950 | 1223-Lng-A-T | 69   | chr5:24894850-24894950 |
| chr5 | 24906550 | 24906650 | 1090-Lng-A-T | 80   | chr5:24906550-24906650 |
| chr5 | 24986150 | 24986250 | 1274-Lng-A-T | 56   | chr5:24986150-24986250 |
| chr5 | 25260650 | 25260750 | 1004-Lng-A-T | 163  | chr5:25260650-25260750 |
| chr5 | 26661950 | 26662050 | 1223-Lng-B-T | 63   | chr5:26661950-26662050 |
| chr5 | 26994850 | 26994950 | 1167-Lng-A-T | 123  | chr5:26994850-26994950 |
| chr5 | 27318250 | 27318350 | 901-Lng-A-T  | 136  | chr5:27318250-27318350 |
| chr5 | 27337150 | 27337250 | 1274-Lng-A-T | 125  | chr5:27337150-27337250 |
| chr5 | 27417850 | 27417950 | 1072-Lng-A-T | 69   | chr5:27417850-27417950 |
| chr5 | 27448550 | 27448650 | 1274-Lng-A-T | 74   | chr5:27448550-27448650 |
| chr5 | 27603150 | 27603250 | 1065-Lng-C-T | 109  | chr5:27603150-27603250 |
| chr5 | 27805650 | 27805750 | 1004-Lng-A-T | 61   | chr5:27805650-27805750 |
| chr5 | 27855650 | 27855750 | 1072-Lng-A-T | 80   | chr5:27855650-27855750 |
| chr5 | 28107750 | 28107850 | 1072-Lng-A-T | 163  | chr5:28107750-28107850 |
| chr5 | 28243650 | 28243750 | 1100-Lng-B-T | 1357 | chr5:28243650-28243750 |
| chr5 | 28255150 | 28255250 | 1065-Lng-B-T | 71   | chr5:28255150-28255250 |
| chr5 | 28328750 | 28328850 | 1223-Lng-B-T | 46   | chr5:28328750-28328850 |
| chr5 | 28372550 | 28372650 | 1167-Lng-A-T | 57   | chr5:28372550-28372650 |
| chr5 | 28402650 | 28402750 | 1152-Lng-A-T | 88   | chr5:28402650-28402750 |
| chr5 | 28435350 | 28435450 | 1100-Lng-B-T | 240  | chr5:28435350-28435450 |
| chr5 | 28438650 | 28438750 | 1223-Lng-C-T | 71   | chr5:28438650-28438750 |
| chr5 | 28496350 | 28496450 | 901-Lng-D-T  | 2137 | chr5:28496350-28496450 |
| chr5 | 28496350 | 28496450 | 1100-Lng-B-T | 424  | chr5:28496350-28496450 |
| chr5 | 28496350 | 28496450 | 1090-Lng-A-T | 1573 | chr5:28496350-28496450 |
| chr5 | 28496350 | 28496450 | 1274-Lng-A-T | 4226 | chr5:28496350-28496450 |
| chr5 | 28496350 | 28496450 | 1188-Lng-A-T | 124  | chr5:28496350-28496450 |
| chr5 | 28496350 | 28496450 | 1090-Lng-B-T | 6507 | chr5:28496350-28496450 |
| chr5 | 28496350 | 28496450 | 1223-Lng-A-T | 1586 | chr5:28496350-28496450 |
| chr5 | 28496350 | 28496450 | 1223-Lng-D-T | 3528 | chr5:28496350-28496450 |
| chr5 | 28496350 | 28496450 | 1065-Lng-B-T | 71   | chr5:28496350-28496450 |
| chr5 | 28496350 | 28496450 | 846-Lng-A-T  | 1602 | chr5:28496350-28496450 |
| chr5 | 28496350 | 28496450 | 1065-Lng-C-T | 289  | chr5:28496350-28496450 |
| chr5 | 28496350 | 28496450 | 1100-Lng-A-T | 5415 | chr5:28496350-28496450 |
| chr5 | 28496350 | 28496450 | 1072-Lng-A-T | 313  | chr5:28496350-28496450 |
| chr5 | 28496350 | 28496450 | 1223-Lng-C-T | 1486 | chr5:28496350-28496450 |
| chr5 | 28496350 | 28496450 | 1152-Lng-A-T | 3209 | chr5:28496350-28496450 |
| chr5 | 28496350 | 28496450 | 901-Lng-C-T  | 84   | chr5:28496350-28496450 |
| chr5 | 28496350 | 28496450 | 1151-Lng-A-T | 2766 | chr5:28496350-28496450 |
| chr5 | 28496350 | 28496450 | 901-Lng-B-T  | 330  | chr5:28496350-28496450 |
| chr5 | 28496350 | 28496450 | 1223-Lng-B-T | 2522 | chr5:28496350-28496450 |
| chr5 | 28496350 | 28496450 | 1167-Lng-A-T | 2176 | chr5:28496350-28496450 |
| chr5 | 28496350 | 28496450 | 901-Lng-D-T  | 292  | chr5:28496350-28496450 |
| chr5 | 28496350 | 28496450 | 1274-Lng-A-T | 545  | chr5:28496350-28496450 |
| chr5 | 28496350 | 28496450 | 1065-Lng-A-T | 347  | chr5:28496350-28496450 |
| chr5 | 28496350 | 28496450 | 1090-Lng-A-T | 3688 | chr5:28496350-28496450 |
| chr5 | 28496350 | 28496450 | 1188-Lng-A-T | 658  | chr5:28496350-28496450 |

**Table S2: SB Insertion regions**

|      |          |          |              |       |                        |
|------|----------|----------|--------------|-------|------------------------|
| chr5 | 28496350 | 28496450 | 1223-Lng-D-T | 1448  | chr5:28496350-28496450 |
| chr5 | 28496350 | 28496450 | 1090-Lng-B-T | 11973 | chr5:28496350-28496450 |
| chr5 | 28496350 | 28496450 | 1223-Lng-A-T | 1353  | chr5:28496350-28496450 |
| chr5 | 28496350 | 28496450 | 1100-Lng-A-T | 943   | chr5:28496350-28496450 |
| chr5 | 28496350 | 28496450 | 1065-Lng-B-T | 638   | chr5:28496350-28496450 |
| chr5 | 28496350 | 28496450 | 1072-Lng-A-T | 52    | chr5:28496350-28496450 |
| chr5 | 28496350 | 28496450 | 1152-Lng-A-T | 150   | chr5:28496350-28496450 |
| chr5 | 28496350 | 28496450 | 901-Lng-C-T  | 186   | chr5:28496350-28496450 |
| chr5 | 28496350 | 28496450 | 1151-Lng-A-T | 440   | chr5:28496350-28496450 |
| chr5 | 28496350 | 28496450 | 1223-Lng-C-T | 3491  | chr5:28496350-28496450 |
| chr5 | 28496350 | 28496450 | 901-Lng-B-T  | 84    | chr5:28496350-28496450 |
| chr5 | 28496350 | 28496450 | 1223-Lng-B-T | 1467  | chr5:28496350-28496450 |
| chr5 | 28496350 | 28496450 | 1167-Lng-A-T | 1119  | chr5:28496350-28496450 |
| chr5 | 28496350 | 28496450 | 901-Lng-A-T  | 629   | chr5:28496350-28496450 |
| chr5 | 28496350 | 28496450 | 1004-Lng-A-T | 216   | chr5:28496350-28496450 |
| chr5 | 28496450 | 28496550 | 1100-Lng-B-T | 70    | chr5:28496450-28496550 |
| chr5 | 28496450 | 28496550 | 1090-Lng-A-T | 545   | chr5:28496450-28496550 |
| chr5 | 28496450 | 28496550 | 1274-Lng-A-T | 4853  | chr5:28496450-28496550 |
| chr5 | 28496450 | 28496550 | 1065-Lng-A-T | 74    | chr5:28496450-28496550 |
| chr5 | 28496450 | 28496550 | 1188-Lng-A-T | 106   | chr5:28496450-28496550 |
| chr5 | 28496450 | 28496550 | 1090-Lng-B-T | 2869  | chr5:28496450-28496550 |
| chr5 | 28496450 | 28496550 | 1223-Lng-D-T | 3050  | chr5:28496450-28496550 |
| chr5 | 28496450 | 28496550 | 1065-Lng-B-T | 150   | chr5:28496450-28496550 |
| chr5 | 28496450 | 28496550 | 1100-Lng-A-T | 8987  | chr5:28496450-28496550 |
| chr5 | 28496450 | 28496550 | 1072-Lng-A-T | 354   | chr5:28496450-28496550 |
| chr5 | 28496450 | 28496550 | 1223-Lng-C-T | 561   | chr5:28496450-28496550 |
| chr5 | 28496450 | 28496550 | 1152-Lng-A-T | 3603  | chr5:28496450-28496550 |
| chr5 | 28496450 | 28496550 | 901-Lng-C-T  | 161   | chr5:28496450-28496550 |
| chr5 | 28496450 | 28496550 | 1151-Lng-A-T | 4094  | chr5:28496450-28496550 |
| chr5 | 28496450 | 28496550 | 901-Lng-B-T  | 537   | chr5:28496450-28496550 |
| chr5 | 28496450 | 28496550 | 1223-Lng-B-T | 1539  | chr5:28496450-28496550 |
| chr5 | 28496450 | 28496550 | 1167-Lng-A-T | 1647  | chr5:28496450-28496550 |
| chr5 | 28496450 | 28496550 | 901-Lng-A-T  | 76    | chr5:28496450-28496550 |
| chr5 | 28496450 | 28496550 | 1004-Lng-A-T | 976   | chr5:28496450-28496550 |
| chr5 | 28496450 | 28496550 | 1274-Lng-A-T | 618   | chr5:28496450-28496550 |
| chr5 | 28496450 | 28496550 | 1100-Lng-B-T | 755   | chr5:28496450-28496550 |
| chr5 | 28496450 | 28496550 | 1090-Lng-A-T | 2659  | chr5:28496450-28496550 |
| chr5 | 28496450 | 28496550 | 1188-Lng-A-T | 1585  | chr5:28496450-28496550 |
| chr5 | 28496450 | 28496550 | 1223-Lng-D-T | 603   | chr5:28496450-28496550 |
| chr5 | 28496450 | 28496550 | 1090-Lng-B-T | 9747  | chr5:28496450-28496550 |
| chr5 | 28496450 | 28496550 | 1223-Lng-A-T | 3961  | chr5:28496450-28496550 |
| chr5 | 28496450 | 28496550 | 1100-Lng-A-T | 1337  | chr5:28496450-28496550 |
| chr5 | 28496450 | 28496550 | 1065-Lng-B-T | 565   | chr5:28496450-28496550 |
| chr5 | 28496450 | 28496550 | 1072-Lng-A-T | 113   | chr5:28496450-28496550 |
| chr5 | 28496450 | 28496550 | 1152-Lng-A-T | 602   | chr5:28496450-28496550 |
| chr5 | 28496450 | 28496550 | 846-Lng-A-T  | 337   | chr5:28496450-28496550 |



**Table S2: SB Insertion regions**

|      |          |          |              |       |                        |
|------|----------|----------|--------------|-------|------------------------|
| chr5 | 28496450 | 28496550 | 1065-Lng-C-T | 2269  | chr5:28496450-28496550 |
| chr5 | 28496450 | 28496550 | 1151-Lng-A-T | 421   | chr5:28496450-28496550 |
| chr5 | 28496450 | 28496550 | 1223-Lng-C-T | 3256  | chr5:28496450-28496550 |
| chr5 | 28496450 | 28496550 | 1223-Lng-B-T | 900   | chr5:28496450-28496550 |
| chr5 | 28496450 | 28496550 | 1167-Lng-A-T | 313   | chr5:28496450-28496550 |
| chr5 | 28496450 | 28496550 | 901-Lng-A-T  | 154   | chr5:28496450-28496550 |
| chr5 | 28496450 | 28496550 | 901-Lng-D-T  | 80    | chr5:28496450-28496550 |
| chr5 | 28496550 | 28496650 | 1188-Lng-A-T | 38    | chr5:28496550-28496650 |
| chr5 | 28496550 | 28496650 | 1090-Lng-B-T | 5873  | chr5:28496550-28496650 |
| chr5 | 28496550 | 28496650 | 1223-Lng-D-T | 5977  | chr5:28496550-28496650 |
| chr5 | 28496550 | 28496650 | 1065-Lng-B-T | 55    | chr5:28496550-28496650 |
| chr5 | 28496550 | 28496650 | 1223-Lng-A-T | 1718  | chr5:28496550-28496650 |
| chr5 | 28496550 | 28496650 | 1100-Lng-A-T | 1664  | chr5:28496550-28496650 |
| chr5 | 28496550 | 28496650 | 1072-Lng-A-T | 273   | chr5:28496550-28496650 |
| chr5 | 28496550 | 28496650 | 1223-Lng-C-T | 835   | chr5:28496550-28496650 |
| chr5 | 28496550 | 28496650 | 1152-Lng-A-T | 645   | chr5:28496550-28496650 |
| chr5 | 28496550 | 28496650 | 846-Lng-A-T  | 1253  | chr5:28496550-28496650 |
| chr5 | 28496550 | 28496650 | 1065-Lng-C-T | 890   | chr5:28496550-28496650 |
| chr5 | 28496550 | 28496650 | 1151-Lng-A-T | 646   | chr5:28496550-28496650 |
| chr5 | 28496550 | 28496650 | 901-Lng-B-T  | 79    | chr5:28496550-28496650 |
| chr5 | 28496550 | 28496650 | 1223-Lng-B-T | 4369  | chr5:28496550-28496650 |
| chr5 | 28496550 | 28496650 | 1167-Lng-A-T | 2703  | chr5:28496550-28496650 |
| chr5 | 28496550 | 28496650 | 901-Lng-A-T  | 1538  | chr5:28496550-28496650 |
| chr5 | 28496550 | 28496650 | 1004-Lng-A-T | 73    | chr5:28496550-28496650 |
| chr5 | 28496550 | 28496650 | 901-Lng-D-T  | 1092  | chr5:28496550-28496650 |
| chr5 | 28496550 | 28496650 | 1274-Lng-A-T | 138   | chr5:28496550-28496650 |
| chr5 | 28496550 | 28496650 | 1100-Lng-B-T | 112   | chr5:28496550-28496650 |
| chr5 | 28496550 | 28496650 | 1090-Lng-A-T | 6325  | chr5:28496550-28496650 |
| chr5 | 28496550 | 28496650 | 1065-Lng-A-T | 605   | chr5:28496550-28496650 |
| chr5 | 28496550 | 28496650 | 1188-Lng-A-T | 126   | chr5:28496550-28496650 |
| chr5 | 28496550 | 28496650 | 1223-Lng-D-T | 646   | chr5:28496550-28496650 |
| chr5 | 28496550 | 28496650 | 1090-Lng-B-T | 23248 | chr5:28496550-28496650 |
| chr5 | 28496550 | 28496650 | 1223-Lng-A-T | 2770  | chr5:28496550-28496650 |
| chr5 | 28496550 | 28496650 | 1100-Lng-A-T | 467   | chr5:28496550-28496650 |
| chr5 | 28496550 | 28496650 | 1065-Lng-B-T | 902   | chr5:28496550-28496650 |
| chr5 | 28496550 | 28496650 | 1152-Lng-A-T | 171   | chr5:28496550-28496650 |
| chr5 | 28496550 | 28496650 | 846-Lng-A-T  | 69    | chr5:28496550-28496650 |
| chr5 | 28496550 | 28496650 | 1151-Lng-A-T | 129   | chr5:28496550-28496650 |
| chr5 | 28496550 | 28496650 | 1223-Lng-C-T | 6061  | chr5:28496550-28496650 |
| chr5 | 28496550 | 28496650 | 1223-Lng-B-T | 1129  | chr5:28496550-28496650 |
| chr5 | 28496550 | 28496650 | 1167-Lng-A-T | 752   | chr5:28496550-28496650 |
| chr5 | 28496550 | 28496650 | 901-Lng-C-T  | 197   | chr5:28496550-28496650 |
| chr5 | 28496550 | 28496650 | 901-Lng-B-T  | 2693  | chr5:28496550-28496650 |
| chr5 | 28496550 | 28496650 | 901-Lng-D-T  | 143   | chr5:28496550-28496650 |
| chr5 | 28496550 | 28496650 | 1004-Lng-A-T | 190   | chr5:28496550-28496650 |
| chr5 | 28496550 | 28496650 | 1090-Lng-A-T | 502   | chr5:28496550-28496650 |

**Table S2: SB Insertion regions**

|      |          |          |              |      |                        |
|------|----------|----------|--------------|------|------------------------|
| chr5 | 28496550 | 28496650 | 1274-Lng-A-T | 1060 | chr5:28496550-28496650 |
| chr5 | 28496650 | 28496750 | 1100-Lng-A-T | 74   | chr5:28496650-28496750 |
| chr5 | 28496650 | 28496750 | 1152-Lng-A-T | 44   | chr5:28496650-28496750 |
| chr5 | 28496750 | 28496850 | 1100-Lng-A-T | 1384 | chr5:28496750-28496850 |
| chr5 | 28496750 | 28496850 | 1152-Lng-A-T | 85   | chr5:28496750-28496850 |
| chr5 | 28496750 | 28496850 | 1151-Lng-A-T | 65   | chr5:28496750-28496850 |
| chr5 | 28496750 | 28496850 | 1274-Lng-A-T | 438  | chr5:28496750-28496850 |
| chr5 | 28496750 | 28496850 | 1188-Lng-A-T | 182  | chr5:28496750-28496850 |
| chr5 | 28496750 | 28496850 | 1100-Lng-A-T | 946  | chr5:28496750-28496850 |
| chr5 | 28496750 | 28496850 | 1152-Lng-A-T | 141  | chr5:28496750-28496850 |
| chr5 | 28496750 | 28496850 | 1151-Lng-A-T | 216  | chr5:28496750-28496850 |
| chr5 | 28496750 | 28496850 | 1274-Lng-A-T | 328  | chr5:28496750-28496850 |
| chr5 | 28496750 | 28496850 | 1100-Lng-B-T | 76   | chr5:28496750-28496850 |
| chr5 | 28669750 | 28669850 | 1223-Lng-B-T | 166  | chr5:28669750-28669850 |
| chr5 | 28689550 | 28689650 | 1065-Lng-A-T | 34   | chr5:28689550-28689650 |
| chr5 | 28716750 | 28716850 | 1223-Lng-D-T | 57   | chr5:28716750-28716850 |
| chr5 | 28723650 | 28723750 | 901-Lng-D-T  | 141  | chr5:28723650-28723750 |
| chr5 | 28728650 | 28728750 | 1274-Lng-A-T | 166  | chr5:28728650-28728750 |
| chr5 | 28733950 | 28734050 | 901-Lng-D-T  | 260  | chr5:28733950-28734050 |
| chr5 | 28738250 | 28738350 | 1100-Lng-A-T | 52   | chr5:28738250-28738350 |
| chr5 | 28824250 | 28824350 | 1223-Lng-B-T | 36   | chr5:28824250-28824350 |
| chr5 | 29017650 | 29017750 | 1151-Lng-A-T | 60   | chr5:29017650-29017750 |
| chr5 | 29240850 | 29240950 | 1188-Lng-A-T | 48   | chr5:29240850-29240950 |
| chr5 | 29752850 | 29752950 | 1065-Lng-B-T | 71   | chr5:29752850-29752950 |
| chr5 | 29783550 | 29783650 | 1274-Lng-A-T | 65   | chr5:29783550-29783650 |
| chr5 | 29843550 | 29843650 | 1065-Lng-A-T | 50   | chr5:29843550-29843650 |
| chr5 | 29844650 | 29844750 | 1223-Lng-A-T | 154  | chr5:29844650-29844750 |
| chr5 | 29845350 | 29845450 | 1100-Lng-B-T | 71   | chr5:29845350-29845450 |
| chr5 | 29907850 | 29907950 | 1274-Lng-A-T | 309  | chr5:29907850-29907950 |
| chr5 | 29928750 | 29928850 | 1152-Lng-A-T | 139  | chr5:29928750-29928850 |
| chr5 | 29975250 | 29975350 | 1065-Lng-B-T | 53   | chr5:29975250-29975350 |
| chr5 | 29983250 | 29983350 | 1065-Lng-B-T | 84   | chr5:29983250-29983350 |
| chr5 | 29993450 | 29993550 | 901-Lng-B-T  | 125  | chr5:29993450-29993550 |
| chr5 | 30091850 | 30091950 | 1065-Lng-A-T | 42   | chr5:30091850-30091950 |
| chr5 | 30107350 | 30107450 | 1274-Lng-A-T | 68   | chr5:30107350-30107450 |
| chr5 | 30242950 | 30243050 | 846-Lng-A-T  | 196  | chr5:30242950-30243050 |
| chr5 | 30477950 | 30478050 | 901-Lng-A-T  | 136  | chr5:30477950-30478050 |
| chr5 | 30508350 | 30508450 | 901-Lng-D-T  | 189  | chr5:30508350-30508450 |
| chr5 | 30517150 | 30517250 | 1065-Lng-A-T | 80   | chr5:30517150-30517250 |
| chr5 | 30577350 | 30577450 | 1274-Lng-A-T | 110  | chr5:30577350-30577450 |
| chr5 | 30606050 | 30606150 | 1004-Lng-A-T | 88   | chr5:30606050-30606150 |
| chr5 | 30697950 | 30698050 | 1065-Lng-B-T | 170  | chr5:30697950-30698050 |
| chr5 | 30773250 | 30773350 | 901-Lng-C-T  | 174  | chr5:30773250-30773350 |
| chr5 | 31004950 | 31005050 | 901-Lng-B-T  | 60   | chr5:31004950-31005050 |
| chr5 | 31042550 | 31042650 | 1072-Lng-A-T | 72   | chr5:31042550-31042650 |
| chr5 | 31049750 | 31049850 | 1223-Lng-B-T | 41   | chr5:31049750-31049850 |

**Table S2: SB Insertion regions**

|      |          |          |              |      |                        |
|------|----------|----------|--------------|------|------------------------|
| chr5 | 31163850 | 31163950 | 1065-Lng-A-T | 50   | chr5:31163850-31163950 |
| chr5 | 31242250 | 31242350 | 1223-Lng-D-T | 41   | chr5:31242250-31242350 |
| chr5 | 31370050 | 31370150 | 901-Lng-C-T  | 75   | chr5:31370050-31370150 |
| chr5 | 31949850 | 31949950 | 846-Lng-A-T  | 77   | chr5:31949850-31949950 |
| chr5 | 31984450 | 31984550 | 1065-Lng-C-T | 73   | chr5:31984450-31984550 |
| chr5 | 32095850 | 32095950 | 1274-Lng-A-T | 91   | chr5:32095850-32095950 |
| chr5 | 32176450 | 32176550 | 1004-Lng-A-T | 49   | chr5:32176450-32176550 |
| chr5 | 32182750 | 32182850 | 1065-Lng-B-T | 45   | chr5:32182750-32182850 |
| chr5 | 32264350 | 32264450 | 1090-Lng-A-T | 60   | chr5:32264350-32264450 |
| chr5 | 32344450 | 32344550 | 901-Lng-B-T  | 50   | chr5:32344450-32344550 |
| chr5 | 32503150 | 32503250 | 1004-Lng-A-T | 64   | chr5:32503150-32503250 |
| chr5 | 32584850 | 32584950 | 1072-Lng-A-T | 86   | chr5:32584850-32584950 |
| chr5 | 32661950 | 32662050 | 1151-Lng-A-T | 71   | chr5:32661950-32662050 |
| chr5 | 32770850 | 32770950 | 1100-Lng-A-T | 58   | chr5:32770850-32770950 |
| chr5 | 32771050 | 32771150 | 1065-Lng-B-T | 70   | chr5:32771050-32771150 |
| chr5 | 32776950 | 32777050 | 1274-Lng-A-T | 84   | chr5:32776950-32777050 |
| chr5 | 32798650 | 32798750 | 1072-Lng-A-T | 121  | chr5:32798650-32798750 |
| chr5 | 32907850 | 32907950 | 1100-Lng-A-T | 131  | chr5:32907850-32907950 |
| chr5 | 32941750 | 32941850 | 1274-Lng-A-T | 151  | chr5:32941750-32941850 |
| chr5 | 32943350 | 32943450 | 1152-Lng-A-T | 279  | chr5:32943350-32943450 |
| chr5 | 33068150 | 33068250 | 1065-Lng-A-T | 60   | chr5:33068150-33068250 |
| chr5 | 33069450 | 33069550 | 1274-Lng-A-T | 148  | chr5:33069450-33069550 |
| chr5 | 33156650 | 33156750 | 1065-Lng-A-T | 80   | chr5:33156650-33156750 |
| chr5 | 33180050 | 33180150 | 901-Lng-C-T  | 63   | chr5:33180050-33180150 |
| chr5 | 33181350 | 33181450 | 1100-Lng-A-T | 113  | chr5:33181350-33181450 |
| chr5 | 33299450 | 33299550 | 1100-Lng-B-T | 55   | chr5:33299450-33299550 |
| chr5 | 33332150 | 33332250 | 1100-Lng-A-T | 63   | chr5:33332150-33332250 |
| chr5 | 33373350 | 33373450 | 1151-Lng-A-T | 91   | chr5:33373350-33373450 |
| chr5 | 33620650 | 33620750 | 1223-Lng-B-T | 76   | chr5:33620650-33620750 |
| chr5 | 33660950 | 33661050 | 901-Lng-C-T  | 242  | chr5:33660950-33661050 |
| chr5 | 33685650 | 33685750 | 1223-Lng-B-T | 35   | chr5:33685650-33685750 |
| chr5 | 33696950 | 33697050 | 1223-Lng-C-T | 43   | chr5:33696950-33697050 |
| chr5 | 33819650 | 33819750 | 901-Lng-B-T  | 147  | chr5:33819650-33819750 |
| chr5 | 34093050 | 34093150 | 1274-Lng-A-T | 121  | chr5:34093050-34093150 |
| chr5 | 34123950 | 34124050 | 1151-Lng-A-T | 58   | chr5:34123950-34124050 |
| chr5 | 34202850 | 34202950 | 1274-Lng-A-T | 1042 | chr5:34202850-34202950 |
| chr5 | 34260650 | 34260750 | 1151-Lng-A-T | 107  | chr5:34260650-34260750 |
| chr5 | 34463350 | 34463450 | 1223-Lng-C-T | 45   | chr5:34463350-34463450 |
| chr5 | 34569650 | 34569750 | 1100-Lng-A-T | 53   | chr5:34569650-34569750 |
| chr5 | 34727750 | 34727850 | 1152-Lng-A-T | 152  | chr5:34727750-34727850 |
| chr5 | 34732750 | 34732850 | 1100-Lng-A-T | 81   | chr5:34732750-34732850 |
| chr5 | 34735150 | 34735250 | 1223-Lng-C-T | 45   | chr5:34735150-34735250 |
| chr5 | 34774550 | 34774650 | 901-Lng-A-T  | 54   | chr5:34774550-34774650 |
| chr5 | 34778350 | 34778450 | 901-Lng-A-T  | 96   | chr5:34778350-34778450 |
| chr5 | 34805750 | 34805850 | 1274-Lng-A-T | 74   | chr5:34805750-34805850 |
| chr5 | 34830150 | 34830250 | 1274-Lng-A-T | 112  | chr5:34830150-34830250 |

**Table S2: SB Insertion regions**

|      |          |          |              |     |                        |
|------|----------|----------|--------------|-----|------------------------|
| chr5 | 34838250 | 34838350 | 1100-Lng-A-T | 75  | chr5:34838250-34838350 |
| chr5 | 35009550 | 35009650 | 1223-Lng-B-T | 48  | chr5:35009550-35009650 |
| chr5 | 35114450 | 35114550 | 1223-Lng-C-T | 76  | chr5:35114450-35114550 |
| chr5 | 35122450 | 35122550 | 901-Lng-C-T  | 55  | chr5:35122450-35122550 |
| chr5 | 35145550 | 35145650 | 1100-Lng-A-T | 80  | chr5:35145550-35145650 |
| chr5 | 35212450 | 35212550 | 1167-Lng-A-T | 49  | chr5:35212450-35212550 |
| chr5 | 35322550 | 35322650 | 1274-Lng-A-T | 61  | chr5:35322550-35322650 |
| chr5 | 35327750 | 35327850 | 1274-Lng-A-T | 162 | chr5:35327750-35327850 |
| chr5 | 35439150 | 35439250 | 1065-Lng-A-T | 61  | chr5:35439150-35439250 |
| chr5 | 35454150 | 35454250 | 1223-Lng-D-T | 40  | chr5:35454150-35454250 |
| chr5 | 35613350 | 35613450 | 1072-Lng-A-T | 74  | chr5:35613350-35613450 |
| chr5 | 35957150 | 35957250 | 1072-Lng-A-T | 49  | chr5:35957150-35957250 |
| chr5 | 36363450 | 36363550 | 1065-Lng-A-T | 59  | chr5:36363450-36363550 |
| chr5 | 36464550 | 36464650 | 901-Lng-A-T  | 97  | chr5:36464550-36464650 |
| chr5 | 36521650 | 36521750 | 1090-Lng-A-T | 94  | chr5:36521650-36521750 |
| chr5 | 36685750 | 36685850 | 901-Lng-B-T  | 69  | chr5:36685750-36685850 |
| chr5 | 36696450 | 36696550 | 1090-Lng-B-T | 277 | chr5:36696450-36696550 |
| chr5 | 37077550 | 37077650 | 1100-Lng-A-T | 84  | chr5:37077550-37077650 |
| chr5 | 37083950 | 37084050 | 1065-Lng-B-T | 54  | chr5:37083950-37084050 |
| chr5 | 37085950 | 37086050 | 901-Lng-A-T  | 60  | chr5:37085950-37086050 |
| chr5 | 37821650 | 37821750 | 1004-Lng-A-T | 85  | chr5:37821650-37821750 |
| chr5 | 37935650 | 37935750 | 1188-Lng-A-T | 36  | chr5:37935650-37935750 |
| chr5 | 37996950 | 37997050 | 1072-Lng-A-T | 61  | chr5:37996950-37997050 |
| chr5 | 38479750 | 38479850 | 1274-Lng-A-T | 222 | chr5:38479750-38479850 |
| chr5 | 38520550 | 38520650 | 1100-Lng-B-T | 172 | chr5:38520550-38520650 |
| chr5 | 38941550 | 38941650 | 1065-Lng-A-T | 85  | chr5:38941550-38941650 |
| chr5 | 38942650 | 38942750 | 1274-Lng-A-T | 50  | chr5:38942650-38942750 |
| chr5 | 39012050 | 39012150 | 846-Lng-A-T  | 97  | chr5:39012050-39012150 |
| chr5 | 39050050 | 39050150 | 1072-Lng-A-T | 188 | chr5:39050050-39050150 |
| chr5 | 39436850 | 39436950 | 1151-Lng-A-T | 304 | chr5:39436850-39436950 |
| chr5 | 39556750 | 39556850 | 846-Lng-A-T  | 155 | chr5:39556750-39556850 |
| chr5 | 39646550 | 39646650 | 1072-Lng-A-T | 112 | chr5:39646550-39646650 |
| chr5 | 39841250 | 39841350 | 1065-Lng-A-T | 48  | chr5:39841250-39841350 |
| chr5 | 39974850 | 39974950 | 1100-Lng-A-T | 114 | chr5:39974850-39974950 |
| chr5 | 40000250 | 40000350 | 1072-Lng-A-T | 72  | chr5:40000250-40000350 |
| chr5 | 40021450 | 40021550 | 1223-Lng-C-T | 52  | chr5:40021450-40021550 |
| chr5 | 40050950 | 40051050 | 1151-Lng-A-T | 348 | chr5:40050950-40051050 |
| chr5 | 40139550 | 40139650 | 1152-Lng-A-T | 66  | chr5:40139550-40139650 |
| chr5 | 40242750 | 40242850 | 901-Lng-D-T  | 553 | chr5:40242750-40242850 |
| chr5 | 40412250 | 40412350 | 1223-Lng-D-T | 47  | chr5:40412250-40412350 |
| chr5 | 40505550 | 40505650 | 1004-Lng-A-T | 80  | chr5:40505550-40505650 |
| chr5 | 40594050 | 40594150 | 1065-Lng-A-T | 74  | chr5:40594050-40594150 |
| chr5 | 40617050 | 40617150 | 1004-Lng-A-T | 72  | chr5:40617050-40617150 |
| chr5 | 40823450 | 40823550 | 1152-Lng-A-T | 96  | chr5:40823450-40823550 |
| chr5 | 41000150 | 41000250 | 1274-Lng-A-T | 54  | chr5:41000150-41000250 |
| chr5 | 41114850 | 41114950 | 901-Lng-C-T  | 69  | chr5:41114850-41114950 |

**Table S2: SB Insertion regions**

|      |          |          |              |     |                        |
|------|----------|----------|--------------|-----|------------------------|
| chr5 | 41176550 | 41176650 | 1072-Lng-A-T | 90  | chr5:41176550-41176650 |
| chr5 | 41230250 | 41230350 | 1223-Lng-B-T | 43  | chr5:41230250-41230350 |
| chr5 | 41269650 | 41269750 | 1065-Lng-C-T | 86  | chr5:41269650-41269750 |
| chr5 | 41440750 | 41440850 | 901-Lng-B-T  | 35  | chr5:41440750-41440850 |
| chr5 | 41477450 | 41477550 | 1167-Lng-A-T | 58  | chr5:41477450-41477550 |
| chr5 | 41688750 | 41688850 | 901-Lng-B-T  | 146 | chr5:41688750-41688850 |
| chr5 | 41822750 | 41822850 | 1065-Lng-A-T | 63  | chr5:41822750-41822850 |
| chr5 | 42049350 | 42049450 | 1065-Lng-C-T | 87  | chr5:42049350-42049450 |
| chr5 | 42105350 | 42105450 | 1072-Lng-A-T | 60  | chr5:42105350-42105450 |
| chr5 | 42195650 | 42195750 | 1004-Lng-A-T | 104 | chr5:42195650-42195750 |
| chr5 | 42612350 | 42612450 | 1065-Lng-A-T | 39  | chr5:42612350-42612450 |
| chr5 | 42817650 | 42817750 | 901-Lng-D-T  | 57  | chr5:42817650-42817750 |
| chr5 | 43004050 | 43004150 | 901-Lng-D-T  | 76  | chr5:43004050-43004150 |
| chr5 | 43032450 | 43032550 | 1065-Lng-A-T | 95  | chr5:43032450-43032550 |
| chr5 | 43090150 | 43090250 | 1274-Lng-A-T | 51  | chr5:43090150-43090250 |
| chr5 | 43232250 | 43232350 | 1004-Lng-A-T | 219 | chr5:43232250-43232350 |
| chr5 | 43371050 | 43371150 | 1223-Lng-C-T | 45  | chr5:43371050-43371150 |
| chr5 | 43546850 | 43546950 | 1152-Lng-A-T | 82  | chr5:43546850-43546950 |
| chr5 | 43615350 | 43615450 | 1090-Lng-B-T | 894 | chr5:43615350-43615450 |
| chr5 | 43645250 | 43645350 | 1090-Lng-A-T | 53  | chr5:43645250-43645350 |
| chr5 | 43674350 | 43674450 | 1223-Lng-D-T | 41  | chr5:43674350-43674450 |
| chr5 | 43725150 | 43725250 | 901-Lng-B-T  | 263 | chr5:43725150-43725250 |
| chr5 | 43836350 | 43836450 | 901-Lng-A-T  | 158 | chr5:43836350-43836450 |
| chr5 | 44082050 | 44082150 | 901-Lng-C-T  | 30  | chr5:44082050-44082150 |
| chr5 | 44145050 | 44145150 | 1004-Lng-A-T | 103 | chr5:44145050-44145150 |
| chr5 | 44166050 | 44166150 | 1188-Lng-A-T | 43  | chr5:44166050-44166150 |
| chr5 | 44368750 | 44368850 | 1151-Lng-A-T | 71  | chr5:44368750-44368850 |
| chr5 | 44499950 | 44500050 | 1167-Lng-A-T | 71  | chr5:44499950-44500050 |
| chr5 | 44591050 | 44591150 | 1223-Lng-B-T | 144 | chr5:44591050-44591150 |
| chr5 | 44601350 | 44601450 | 1223-Lng-A-T | 439 | chr5:44601350-44601450 |
| chr5 | 44759350 | 44759450 | 1223-Lng-C-T | 64  | chr5:44759350-44759450 |
| chr5 | 44855050 | 44855150 | 1072-Lng-A-T | 74  | chr5:44855050-44855150 |
| chr5 | 44939650 | 44939750 | 1223-Lng-D-T | 100 | chr5:44939650-44939750 |
| chr5 | 45011950 | 45012050 | 1004-Lng-A-T | 51  | chr5:45011950-45012050 |
| chr5 | 45019550 | 45019650 | 1065-Lng-A-T | 123 | chr5:45019550-45019650 |
| chr5 | 45070450 | 45070550 | 1274-Lng-A-T | 176 | chr5:45070450-45070550 |
| chr5 | 45394150 | 45394250 | 1151-Lng-A-T | 245 | chr5:45394150-45394250 |
| chr5 | 45522150 | 45522250 | 1065-Lng-C-T | 94  | chr5:45522150-45522250 |
| chr5 | 45973150 | 45973250 | 1072-Lng-A-T | 56  | chr5:45973150-45973250 |
| chr5 | 46133850 | 46133950 | 1065-Lng-C-T | 78  | chr5:46133850-46133950 |
| chr5 | 46149850 | 46149950 | 1188-Lng-A-T | 38  | chr5:46149850-46149950 |
| chr5 | 46162150 | 46162250 | 901-Lng-A-T  | 177 | chr5:46162150-46162250 |
| chr5 | 46195450 | 46195550 | 1152-Lng-A-T | 86  | chr5:46195450-46195550 |
| chr5 | 46206250 | 46206350 | 1100-Lng-A-T | 160 | chr5:46206250-46206350 |
| chr5 | 46234150 | 46234250 | 1065-Lng-A-T | 122 | chr5:46234150-46234250 |
| chr5 | 46257950 | 46258050 | 1100-Lng-B-T | 142 | chr5:46257950-46258050 |

**Table S2: SB Insertion regions**

|      |          |          |              |      |                        |
|------|----------|----------|--------------|------|------------------------|
| chr5 | 46495650 | 46495750 | 1100-Lng-A-T | 51   | chr5:46495650-46495750 |
| chr5 | 46634250 | 46634350 | 1065-Lng-A-T | 97   | chr5:46634250-46634350 |
| chr5 | 46721950 | 46722050 | 1152-Lng-A-T | 39   | chr5:46721950-46722050 |
| chr5 | 46779650 | 46779750 | 901-Lng-B-T  | 185  | chr5:46779650-46779750 |
| chr5 | 46887850 | 46887950 | 1004-Lng-A-T | 104  | chr5:46887850-46887950 |
| chr5 | 46910450 | 46910550 | 1152-Lng-A-T | 120  | chr5:46910450-46910550 |
| chr5 | 46910750 | 46910850 | 1065-Lng-B-T | 68   | chr5:46910750-46910850 |
| chr5 | 46940550 | 46940650 | 1152-Lng-A-T | 72   | chr5:46940550-46940650 |
| chr5 | 46958150 | 46958250 | 901-Lng-B-T  | 100  | chr5:46958150-46958250 |
| chr5 | 47267550 | 47267650 | 846-Lng-A-T  | 1767 | chr5:47267550-47267650 |
| chr5 | 47351150 | 47351250 | 1065-Lng-A-T | 72   | chr5:47351150-47351250 |
| chr5 | 47596150 | 47596250 | 1004-Lng-A-T | 92   | chr5:47596150-47596250 |
| chr5 | 47608150 | 47608250 | 846-Lng-A-T  | 112  | chr5:47608150-47608250 |
| chr5 | 47654650 | 47654750 | 1223-Lng-A-T | 97   | chr5:47654650-47654750 |
| chr5 | 47741950 | 47742050 | 1065-Lng-A-T | 81   | chr5:47741950-47742050 |
| chr5 | 47900250 | 47900350 | 1065-Lng-A-T | 127  | chr5:47900250-47900350 |
| chr5 | 48132250 | 48132350 | 1223-Lng-C-T | 56   | chr5:48132250-48132350 |
| chr5 | 48178650 | 48178750 | 1065-Lng-A-T | 78   | chr5:48178650-48178750 |
| chr5 | 48320050 | 48320150 | 1100-Lng-A-T | 53   | chr5:48320050-48320150 |
| chr5 | 48500650 | 48500750 | 901-Lng-A-T  | 531  | chr5:48500650-48500750 |
| chr5 | 48653450 | 48653550 | 1151-Lng-A-T | 63   | chr5:48653450-48653550 |
| chr5 | 48665650 | 48665750 | 1223-Lng-C-T | 46   | chr5:48665650-48665750 |
| chr5 | 48717650 | 48717750 | 901-Lng-A-T  | 231  | chr5:48717650-48717750 |
| chr5 | 48824250 | 48824350 | 1065-Lng-B-T | 49   | chr5:48824250-48824350 |
| chr5 | 48840950 | 48841050 | 901-Lng-B-T  | 232  | chr5:48840950-48841050 |
| chr5 | 48859650 | 48859750 | 1065-Lng-B-T | 100  | chr5:48859650-48859750 |
| chr5 | 49643850 | 49643950 | 1072-Lng-A-T | 107  | chr5:49643850-49643950 |
| chr5 | 49716950 | 49717050 | 1004-Lng-A-T | 78   | chr5:49716950-49717050 |
| chr5 | 49766950 | 49767050 | 1072-Lng-A-T | 50   | chr5:49766950-49767050 |
| chr5 | 49981950 | 49982050 | 1072-Lng-A-T | 224  | chr5:49981950-49982050 |
| chr5 | 50055750 | 50055850 | 901-Lng-B-T  | 89   | chr5:50055750-50055850 |
| chr5 | 50393750 | 50393850 | 1072-Lng-A-T | 72   | chr5:50393750-50393850 |
| chr5 | 50404250 | 50404350 | 1004-Lng-A-T | 94   | chr5:50404250-50404350 |
| chr5 | 50420650 | 50420750 | 1151-Lng-A-T | 63   | chr5:50420650-50420750 |
| chr5 | 50610750 | 50610850 | 1274-Lng-A-T | 168  | chr5:50610750-50610850 |
| chr5 | 50634150 | 50634250 | 1152-Lng-A-T | 57   | chr5:50634150-50634250 |
| chr5 | 51009150 | 51009250 | 1072-Lng-A-T | 58   | chr5:51009150-51009250 |
| chr5 | 51322450 | 51322550 | 1065-Lng-B-T | 63   | chr5:51322450-51322550 |
| chr5 | 51419350 | 51419450 | 1152-Lng-A-T | 462  | chr5:51419350-51419450 |
| chr5 | 51446750 | 51446850 | 1152-Lng-A-T | 103  | chr5:51446750-51446850 |
| chr5 | 51498850 | 51498950 | 1274-Lng-A-T | 105  | chr5:51498850-51498950 |
| chr5 | 51508650 | 51508750 | 1004-Lng-A-T | 69   | chr5:51508650-51508750 |
| chr5 | 51666150 | 51666250 | 901-Lng-B-T  | 100  | chr5:51666150-51666250 |
| chr5 | 51709250 | 51709350 | 1223-Lng-C-T | 45   | chr5:51709250-51709350 |
| chr5 | 51730550 | 51730650 | 1090-Lng-A-T | 121  | chr5:51730550-51730650 |
| chr5 | 51841050 | 51841150 | 846-Lng-A-T  | 611  | chr5:51841050-51841150 |

**Table S2: SB Insertion regions**

|      |          |          |              |      |                        |
|------|----------|----------|--------------|------|------------------------|
| chr5 | 51944750 | 51944850 | 901-Lng-D-T  | 547  | chr5:51944750-51944850 |
| chr5 | 52197750 | 52197850 | 1274-Lng-A-T | 118  | chr5:52197750-52197850 |
| chr5 | 52538650 | 52538750 | 1090-Lng-B-T | 118  | chr5:52538650-52538750 |
| chr5 | 52553450 | 52553550 | 1152-Lng-A-T | 103  | chr5:52553450-52553550 |
| chr5 | 52553550 | 52553650 | 1065-Lng-B-T | 56   | chr5:52553550-52553650 |
| chr5 | 52562450 | 52562550 | 901-Lng-D-T  | 339  | chr5:52562450-52562550 |
| chr5 | 52571850 | 52571950 | 901-Lng-C-T  | 45   | chr5:52571850-52571950 |
| chr5 | 52803650 | 52803750 | 1072-Lng-A-T | 96   | chr5:52803650-52803750 |
| chr5 | 52804150 | 52804250 | 1072-Lng-A-T | 52   | chr5:52804150-52804250 |
| chr5 | 52897250 | 52897350 | 1223-Lng-C-T | 54   | chr5:52897250-52897350 |
| chr5 | 53041750 | 53041850 | 901-Lng-A-T  | 176  | chr5:53041750-53041850 |
| chr5 | 53052050 | 53052150 | 1188-Lng-A-T | 46   | chr5:53052050-53052150 |
| chr5 | 53059850 | 53059950 | 1274-Lng-A-T | 51   | chr5:53059850-53059950 |
| chr5 | 53093250 | 53093350 | 1065-Lng-C-T | 70   | chr5:53093250-53093350 |
| chr5 | 53137150 | 53137250 | 1188-Lng-A-T | 97   | chr5:53137150-53137250 |
| chr5 | 53137150 | 53137250 | 1151-Lng-A-T | 2259 | chr5:53137150-53137250 |
| chr5 | 53158150 | 53158250 | 1100-Lng-A-T | 166  | chr5:53158150-53158250 |
| chr5 | 53160650 | 53160750 | 901-Lng-D-T  | 141  | chr5:53160650-53160750 |
| chr5 | 53166650 | 53166750 | 1188-Lng-A-T | 135  | chr5:53166650-53166750 |
| chr5 | 53226150 | 53226250 | 1274-Lng-A-T | 173  | chr5:53226150-53226250 |
| chr5 | 53250750 | 53250850 | 1188-Lng-A-T | 238  | chr5:53250750-53250850 |
| chr5 | 53269250 | 53269350 | 1100-Lng-A-T | 51   | chr5:53269250-53269350 |
| chr5 | 53422850 | 53422950 | 1188-Lng-A-T | 200  | chr5:53422850-53422950 |
| chr5 | 53621450 | 53621550 | 1100-Lng-B-T | 87   | chr5:53621450-53621550 |
| chr5 | 53798050 | 53798150 | 1188-Lng-A-T | 232  | chr5:53798050-53798150 |
| chr5 | 53920850 | 53920950 | 1100-Lng-A-T | 80   | chr5:53920850-53920950 |
| chr5 | 54001350 | 54001450 | 1167-Lng-A-T | 58   | chr5:54001350-54001450 |
| chr5 | 54002250 | 54002350 | 1274-Lng-A-T | 206  | chr5:54002250-54002350 |
| chr5 | 54004550 | 54004650 | 1223-Lng-A-T | 152  | chr5:54004550-54004650 |
| chr5 | 54025150 | 54025250 | 1274-Lng-A-T | 83   | chr5:54025150-54025250 |
| chr5 | 54032750 | 54032850 | 901-Lng-A-T  | 127  | chr5:54032750-54032850 |
| chr5 | 54034950 | 54035050 | 1223-Lng-B-T | 226  | chr5:54034950-54035050 |
| chr5 | 54037850 | 54037950 | 1065-Lng-B-T | 91   | chr5:54037850-54037950 |
| chr5 | 54181050 | 54181150 | 901-Lng-A-T  | 60   | chr5:54181050-54181150 |
| chr5 | 54401050 | 54401150 | 1223-Lng-A-T | 134  | chr5:54401050-54401150 |
| chr5 | 54415050 | 54415150 | 1223-Lng-B-T | 35   | chr5:54415050-54415150 |
| chr5 | 54426250 | 54426350 | 1065-Lng-C-T | 96   | chr5:54426250-54426350 |
| chr5 | 54427350 | 54427450 | 1274-Lng-A-T | 92   | chr5:54427350-54427450 |
| chr5 | 54429050 | 54429150 | 1152-Lng-A-T | 187  | chr5:54429050-54429150 |
| chr5 | 54435150 | 54435250 | 1100-Lng-A-T | 71   | chr5:54435150-54435250 |
| chr5 | 54452650 | 54452750 | 1072-Lng-A-T | 61   | chr5:54452650-54452750 |
| chr5 | 54475250 | 54475350 | 1004-Lng-A-T | 94   | chr5:54475250-54475350 |
| chr5 | 54482850 | 54482950 | 1065-Lng-B-T | 97   | chr5:54482850-54482950 |
| chr5 | 54483050 | 54483150 | 1274-Lng-A-T | 144  | chr5:54483050-54483150 |
| chr5 | 54491050 | 54491150 | 1072-Lng-A-T | 179  | chr5:54491050-54491150 |
| chr5 | 54513750 | 54513850 | 1274-Lng-A-T | 156  | chr5:54513750-54513850 |

**Table S2: SB Insertion regions**

|      |          |          |              |      |                        |
|------|----------|----------|--------------|------|------------------------|
| chr5 | 54523050 | 54523150 | 1004-Lng-A-T | 76   | chr5:54523050-54523150 |
| chr5 | 54550350 | 54550450 | 1065-Lng-B-T | 41   | chr5:54550350-54550450 |
| chr5 | 54837050 | 54837150 | 1223-Lng-B-T | 37   | chr5:54837050-54837150 |
| chr5 | 54877750 | 54877850 | 1223-Lng-B-T | 45   | chr5:54877750-54877850 |
| chr5 | 54979550 | 54979650 | 1090-Lng-A-T | 107  | chr5:54979550-54979650 |
| chr5 | 55227450 | 55227550 | 1100-Lng-A-T | 102  | chr5:55227450-55227550 |
| chr5 | 55589550 | 55589650 | 1223-Lng-B-T | 76   | chr5:55589550-55589650 |
| chr5 | 55609450 | 55609550 | 901-Lng-B-T  | 161  | chr5:55609450-55609550 |
| chr5 | 55792050 | 55792150 | 1152-Lng-A-T | 220  | chr5:55792050-55792150 |
| chr5 | 55955650 | 55955750 | 1072-Lng-A-T | 147  | chr5:55955650-55955750 |
| chr5 | 55996550 | 55996650 | 1223-Lng-A-T | 137  | chr5:55996550-55996650 |
| chr5 | 55999750 | 55999850 | 1188-Lng-A-T | 181  | chr5:55999750-55999850 |
| chr5 | 56066450 | 56066550 | 901-Lng-C-T  | 91   | chr5:56066450-56066550 |
| chr5 | 56149950 | 56150050 | 1090-Lng-A-T | 124  | chr5:56149950-56150050 |
| chr5 | 56184650 | 56184750 | 901-Lng-C-T  | 173  | chr5:56184650-56184750 |
| chr5 | 56205250 | 56205350 | 901-Lng-C-T  | 63   | chr5:56205250-56205350 |
| chr5 | 56402950 | 56403050 | 1100-Lng-A-T | 57   | chr5:56402950-56403050 |
| chr5 | 56610550 | 56610650 | 846-Lng-A-T  | 55   | chr5:56610550-56610650 |
| chr5 | 56719950 | 56720050 | 1004-Lng-A-T | 75   | chr5:56719950-56720050 |
| chr5 | 56982050 | 56982150 | 1065-Lng-B-T | 60   | chr5:56982050-56982150 |
| chr5 | 57240250 | 57240350 | 901-Lng-B-T  | 262  | chr5:57240250-57240350 |
| chr5 | 57240950 | 57241050 | 1072-Lng-A-T | 79   | chr5:57240950-57241050 |
| chr5 | 57295150 | 57295250 | 1004-Lng-A-T | 75   | chr5:57295150-57295250 |
| chr5 | 57323450 | 57323550 | 1223-Lng-B-T | 230  | chr5:57323450-57323550 |
| chr5 | 57340350 | 57340450 | 1004-Lng-A-T | 83   | chr5:57340350-57340450 |
| chr5 | 57588850 | 57588950 | 1223-Lng-B-T | 38   | chr5:57588850-57588950 |
| chr5 | 57710150 | 57710250 | 1223-Lng-B-T | 35   | chr5:57710150-57710250 |
| chr5 | 57874150 | 57874250 | 1065-Lng-A-T | 50   | chr5:57874150-57874250 |
| chr5 | 57905350 | 57905450 | 1152-Lng-A-T | 55   | chr5:57905350-57905450 |
| chr5 | 57933850 | 57933950 | 901-Lng-A-T  | 86   | chr5:57933850-57933950 |
| chr5 | 58021350 | 58021450 | 901-Lng-C-T  | 49   | chr5:58021350-58021450 |
| chr5 | 58187250 | 58187350 | 1152-Lng-A-T | 184  | chr5:58187250-58187350 |
| chr5 | 58223750 | 58223850 | 1090-Lng-A-T | 66   | chr5:58223750-58223850 |
| chr5 | 58453150 | 58453250 | 1274-Lng-A-T | 90   | chr5:58453150-58453250 |
| chr5 | 58499750 | 58499850 | 1188-Lng-A-T | 49   | chr5:58499750-58499850 |
| chr5 | 58651250 | 58651350 | 1004-Lng-A-T | 72   | chr5:58651250-58651350 |
| chr5 | 58657450 | 58657550 | 901-Lng-B-T  | 58   | chr5:58657450-58657550 |
| chr5 | 58810750 | 58810850 | 1065-Lng-A-T | 71   | chr5:58810750-58810850 |
| chr5 | 58918250 | 58918350 | 1100-Lng-A-T | 105  | chr5:58918250-58918350 |
| chr5 | 59036750 | 59036850 | 1004-Lng-A-T | 63   | chr5:59036750-59036850 |
| chr5 | 59225850 | 59225950 | 1065-Lng-A-T | 263  | chr5:59225850-59225950 |
| chr5 | 59245050 | 59245150 | 1065-Lng-A-T | 791  | chr5:59245050-59245150 |
| chr5 | 59323950 | 59324050 | 1100-Lng-A-T | 54   | chr5:59323950-59324050 |
| chr5 | 59345150 | 59345250 | 1152-Lng-A-T | 51   | chr5:59345150-59345250 |
| chr5 | 59458250 | 59458350 | 1090-Lng-B-T | 1028 | chr5:59458250-59458350 |
| chr5 | 59553150 | 59553250 | 1065-Lng-C-T | 64   | chr5:59553150-59553250 |



**Table S2: SB Insertion regions**

|      |          |          |              |      |                        |
|------|----------|----------|--------------|------|------------------------|
| chr5 | 59553650 | 59553750 | 1090-Lng-A-T | 212  | chr5:59553650-59553750 |
| chr5 | 59680350 | 59680450 | 1152-Lng-A-T | 42   | chr5:59680350-59680450 |
| chr5 | 59764950 | 59765050 | 1152-Lng-A-T | 55   | chr5:59764950-59765050 |
| chr5 | 60337350 | 60337450 | 901-Lng-B-T  | 137  | chr5:60337350-60337450 |
| chr5 | 60507050 | 60507150 | 901-Lng-C-T  | 87   | chr5:60507050-60507150 |
| chr5 | 60612850 | 60612950 | 1151-Lng-A-T | 99   | chr5:60612850-60612950 |
| chr5 | 60690550 | 60690650 | 1072-Lng-A-T | 75   | chr5:60690550-60690650 |
| chr5 | 60845450 | 60845550 | 1004-Lng-A-T | 79   | chr5:60845450-60845550 |
| chr5 | 60954450 | 60954550 | 1065-Lng-A-T | 70   | chr5:60954450-60954550 |
| chr5 | 61069450 | 61069550 | 1223-Lng-A-T | 98   | chr5:61069450-61069550 |
| chr5 | 61153450 | 61153550 | 901-Lng-D-T  | 105  | chr5:61153450-61153550 |
| chr5 | 61297950 | 61298050 | 1152-Lng-A-T | 295  | chr5:61297950-61298050 |
| chr5 | 61467650 | 61467750 | 1188-Lng-A-T | 87   | chr5:61467650-61467750 |
| chr5 | 61604150 | 61604250 | 1274-Lng-A-T | 68   | chr5:61604150-61604250 |
| chr5 | 61632550 | 61632650 | 1004-Lng-A-T | 132  | chr5:61632550-61632650 |
| chr5 | 61997350 | 61997450 | 1072-Lng-A-T | 107  | chr5:61997350-61997450 |
| chr5 | 62042850 | 62042950 | 1065-Lng-B-T | 53   | chr5:62042850-62042950 |
| chr5 | 62149550 | 62149650 | 901-Lng-D-T  | 436  | chr5:62149550-62149650 |
| chr5 | 62253950 | 62254050 | 1152-Lng-A-T | 105  | chr5:62253950-62254050 |
| chr5 | 62595750 | 62595850 | 1065-Lng-A-T | 51   | chr5:62595750-62595850 |
| chr5 | 62858750 | 62858850 | 1151-Lng-A-T | 331  | chr5:62858750-62858850 |
| chr5 | 62991550 | 62991650 | 901-Lng-D-T  | 436  | chr5:62991550-62991650 |
| chr5 | 63088250 | 63088350 | 1223-Lng-A-T | 113  | chr5:63088250-63088350 |
| chr5 | 63678250 | 63678350 | 1065-Lng-A-T | 55   | chr5:63678250-63678350 |
| chr5 | 63679850 | 63679950 | 1090-Lng-A-T | 46   | chr5:63679850-63679950 |
| chr5 | 63751550 | 63751650 | 1065-Lng-C-T | 91   | chr5:63751550-63751650 |
| chr5 | 63904650 | 63904750 | 1167-Lng-A-T | 67   | chr5:63904650-63904750 |
| chr5 | 64066650 | 64066750 | 1188-Lng-A-T | 60   | chr5:64066650-64066750 |
| chr5 | 64263050 | 64263150 | 1274-Lng-A-T | 49   | chr5:64263050-64263150 |
| chr5 | 64267350 | 64267450 | 1152-Lng-A-T | 53   | chr5:64267350-64267450 |
| chr5 | 64402750 | 64402850 | 1065-Lng-B-T | 62   | chr5:64402750-64402850 |
| chr5 | 64507650 | 64507750 | 846-Lng-A-T  | 94   | chr5:64507650-64507750 |
| chr5 | 64630250 | 64630350 | 1223-Lng-A-T | 85   | chr5:64630250-64630350 |
| chr5 | 64691250 | 64691350 | 1065-Lng-A-T | 71   | chr5:64691250-64691350 |
| chr5 | 64747050 | 64747150 | 1004-Lng-A-T | 111  | chr5:64747050-64747150 |
| chr5 | 65014950 | 65015050 | 1100-Lng-A-T | 88   | chr5:65014950-65015050 |
| chr5 | 65043350 | 65043450 | 1004-Lng-A-T | 1030 | chr5:65043350-65043450 |
| chr5 | 65141650 | 65141750 | 1223-Lng-B-T | 39   | chr5:65141650-65141750 |
| chr5 | 65201750 | 65201850 | 1065-Lng-A-T | 73   | chr5:65201750-65201850 |
| chr5 | 65215650 | 65215750 | 1152-Lng-A-T | 67   | chr5:65215650-65215750 |
| chr5 | 65357250 | 65357350 | 901-Lng-A-T  | 434  | chr5:65357250-65357350 |
| chr5 | 65458550 | 65458650 | 1065-Lng-C-T | 87   | chr5:65458550-65458650 |
| chr5 | 65508550 | 65508650 | 1188-Lng-A-T | 56   | chr5:65508550-65508650 |
| chr5 | 65512350 | 65512450 | 1152-Lng-A-T | 42   | chr5:65512350-65512450 |
| chr5 | 65538350 | 65538450 | 1274-Lng-A-T | 260  | chr5:65538350-65538450 |
| chr5 | 65542750 | 65542850 | 1223-Lng-B-T | 35   | chr5:65542750-65542850 |

**Table S2: SB Insertion regions**

|      |          |          |              |       |                        |
|------|----------|----------|--------------|-------|------------------------|
| chr5 | 65652250 | 65652350 | 1223-Lng-C-T | 678   | chr5:65652250-65652350 |
| chr5 | 65670650 | 65670750 | 1167-Lng-A-T | 106   | chr5:65670650-65670750 |
| chr5 | 65779850 | 65779950 | 1152-Lng-A-T | 78    | chr5:65779850-65779950 |
| chr5 | 65792550 | 65792650 | 1004-Lng-A-T | 109   | chr5:65792550-65792650 |
| chr5 | 65794350 | 65794450 | 1100-Lng-A-T | 53    | chr5:65794350-65794450 |
| chr5 | 65835250 | 65835350 | 1274-Lng-A-T | 222   | chr5:65835250-65835350 |
| chr5 | 65839350 | 65839450 | 1151-Lng-A-T | 140   | chr5:65839350-65839450 |
| chr5 | 65869650 | 65869750 | 1065-Lng-B-T | 55    | chr5:65869650-65869750 |
| chr5 | 65888450 | 65888550 | 1151-Lng-A-T | 56    | chr5:65888450-65888550 |
| chr5 | 65965650 | 65965750 | 901-Lng-D-T  | 125   | chr5:65965650-65965750 |
| chr5 | 65997250 | 65997350 | 846-Lng-A-T  | 674   | chr5:65997250-65997350 |
| chr5 | 66020250 | 66020350 | 1100-Lng-A-T | 331   | chr5:66020250-66020350 |
| chr5 | 66053350 | 66053450 | 1072-Lng-A-T | 113   | chr5:66053350-66053450 |
| chr5 | 66059950 | 66060050 | 1223-Lng-B-T | 252   | chr5:66059950-66060050 |
| chr5 | 66196650 | 66196750 | 1065-Lng-B-T | 57    | chr5:66196650-66196750 |
| chr5 | 66386150 | 66386250 | 1274-Lng-A-T | 134   | chr5:66386150-66386250 |
| chr5 | 66413650 | 66413750 | 1274-Lng-A-T | 168   | chr5:66413650-66413750 |
| chr5 | 66454050 | 66454150 | 1151-Lng-A-T | 68    | chr5:66454050-66454150 |
| chr5 | 66476650 | 66476750 | 1065-Lng-B-T | 45    | chr5:66476650-66476750 |
| chr5 | 66504550 | 66504650 | 1152-Lng-A-T | 152   | chr5:66504550-66504650 |
| chr5 | 66540450 | 66540550 | 1151-Lng-A-T | 270   | chr5:66540450-66540550 |
| chr5 | 66580250 | 66580350 | 1274-Lng-A-T | 81    | chr5:66580250-66580350 |
| chr5 | 66705250 | 66705350 | 1274-Lng-A-T | 69    | chr5:66705250-66705350 |
| chr5 | 66711750 | 66711850 | 1188-Lng-A-T | 94    | chr5:66711750-66711850 |
| chr5 | 66717250 | 66717350 | 901-Lng-B-T  | 53    | chr5:66717250-66717350 |
| chr5 | 66725050 | 66725150 | 1065-Lng-A-T | 91    | chr5:66725050-66725150 |
| chr5 | 66786550 | 66786650 | 1065-Lng-C-T | 66    | chr5:66786550-66786650 |
| chr5 | 66807050 | 66807150 | 1090-Lng-A-T | 304   | chr5:66807050-66807150 |
| chr5 | 66829050 | 66829150 | 1223-Lng-A-T | 105   | chr5:66829050-66829150 |
| chr5 | 66873350 | 66873450 | 1167-Lng-A-T | 73    | chr5:66873350-66873450 |
| chr5 | 66909450 | 66909550 | 1167-Lng-A-T | 10899 | chr5:66909450-66909550 |
| chr5 | 66910450 | 66910550 | 1100-Lng-A-T | 159   | chr5:66910450-66910550 |
| chr5 | 66926650 | 66926750 | 1065-Lng-A-T | 42    | chr5:66926650-66926750 |
| chr5 | 66948150 | 66948250 | 1223-Lng-B-T | 36    | chr5:66948150-66948250 |
| chr5 | 66981550 | 66981650 | 1274-Lng-A-T | 60    | chr5:66981550-66981650 |
| chr5 | 67034050 | 67034150 | 1065-Lng-A-T | 66    | chr5:67034050-67034150 |
| chr5 | 67124550 | 67124650 | 1065-Lng-A-T | 61    | chr5:67124550-67124650 |
| chr5 | 67252250 | 67252350 | 1223-Lng-C-T | 54    | chr5:67252250-67252350 |
| chr5 | 67283150 | 67283250 | 1151-Lng-A-T | 71    | chr5:67283150-67283250 |
| chr5 | 67308050 | 67308150 | 1065-Lng-B-T | 200   | chr5:67308050-67308150 |
| chr5 | 67326950 | 67327050 | 1223-Lng-D-T | 55    | chr5:67326950-67327050 |
| chr5 | 67371950 | 67372050 | 1065-Lng-C-T | 136   | chr5:67371950-67372050 |
| chr5 | 67693850 | 67693950 | 846-Lng-A-T  | 86    | chr5:67693850-67693950 |
| chr5 | 67721150 | 67721250 | 1065-Lng-A-T | 64    | chr5:67721150-67721250 |
| chr5 | 67972050 | 67972150 | 1065-Lng-B-T | 82    | chr5:67972050-67972150 |
| chr5 | 68012550 | 68012650 | 1223-Lng-D-T | 103   | chr5:68012550-68012650 |

**Table S2: SB Insertion regions**

|      |          |          |              |      |                        |
|------|----------|----------|--------------|------|------------------------|
| chr5 | 68018650 | 68018750 | 1090-Lng-B-T | 318  | chr5:68018650-68018750 |
| chr5 | 68051950 | 68052050 | 1100-Lng-A-T | 144  | chr5:68051950-68052050 |
| chr5 | 68052250 | 68052350 | 1065-Lng-A-T | 39   | chr5:68052250-68052350 |
| chr5 | 68096450 | 68096550 | 901-Lng-A-T  | 156  | chr5:68096450-68096550 |
| chr5 | 68127050 | 68127150 | 1065-Lng-A-T | 44   | chr5:68127050-68127150 |
| chr5 | 68138550 | 68138650 | 1223-Lng-C-T | 1498 | chr5:68138550-68138650 |
| chr5 | 68164150 | 68164250 | 901-Lng-A-T  | 399  | chr5:68164150-68164250 |
| chr5 | 68213150 | 68213250 | 1188-Lng-A-T | 63   | chr5:68213150-68213250 |
| chr5 | 68219750 | 68219850 | 846-Lng-A-T  | 45   | chr5:68219750-68219850 |
| chr5 | 68222550 | 68222650 | 1152-Lng-A-T | 277  | chr5:68222550-68222650 |
| chr5 | 68230850 | 68230950 | 1274-Lng-A-T | 109  | chr5:68230850-68230950 |
| chr5 | 68341850 | 68341950 | 1100-Lng-A-T | 239  | chr5:68341850-68341950 |
| chr5 | 68710950 | 68711050 | 1100-Lng-A-T | 143  | chr5:68710950-68711050 |
| chr5 | 69021350 | 69021450 | 1065-Lng-B-T | 191  | chr5:69021350-69021450 |
| chr5 | 69149650 | 69149750 | 1274-Lng-A-T | 100  | chr5:69149650-69149750 |
| chr5 | 69250850 | 69250950 | 846-Lng-A-T  | 1459 | chr5:69250850-69250950 |
| chr5 | 69402650 | 69402750 | 1151-Lng-A-T | 106  | chr5:69402650-69402750 |
| chr5 | 69453250 | 69453350 | 1151-Lng-A-T | 59   | chr5:69453250-69453350 |
| chr5 | 69698550 | 69698650 | 1090-Lng-A-T | 78   | chr5:69698550-69698650 |
| chr5 | 69703750 | 69703850 | 1223-Lng-B-T | 35   | chr5:69703750-69703850 |
| chr5 | 69914850 | 69914950 | 1004-Lng-A-T | 71   | chr5:69914850-69914950 |
| chr5 | 69966850 | 69966950 | 1090-Lng-A-T | 58   | chr5:69966850-69966950 |
| chr5 | 70033150 | 70033250 | 1152-Lng-A-T | 94   | chr5:70033150-70033250 |
| chr5 | 70147350 | 70147450 | 1167-Lng-A-T | 150  | chr5:70147350-70147450 |
| chr5 | 70218450 | 70218550 | 1152-Lng-A-T | 224  | chr5:70218450-70218550 |
| chr5 | 70256850 | 70256950 | 1065-Lng-C-T | 71   | chr5:70256850-70256950 |
| chr5 | 70571550 | 70571650 | 901-Lng-A-T  | 63   | chr5:70571550-70571650 |
| chr5 | 70663950 | 70664050 | 1065-Lng-B-T | 40   | chr5:70663950-70664050 |
| chr5 | 70726450 | 70726550 | 901-Lng-B-T  | 83   | chr5:70726450-70726550 |
| chr5 | 70732050 | 70732150 | 1065-Lng-B-T | 63   | chr5:70732050-70732150 |
| chr5 | 70757750 | 70757850 | 901-Lng-A-T  | 106  | chr5:70757750-70757850 |
| chr5 | 70794750 | 70794850 | 901-Lng-A-T  | 66   | chr5:70794750-70794850 |
| chr5 | 70852250 | 70852350 | 901-Lng-B-T  | 48   | chr5:70852250-70852350 |
| chr5 | 70901150 | 70901250 | 1004-Lng-A-T | 88   | chr5:70901150-70901250 |
| chr5 | 71177950 | 71178050 | 1167-Lng-A-T | 193  | chr5:71177950-71178050 |
| chr5 | 71367550 | 71367650 | 1065-Lng-B-T | 63   | chr5:71367550-71367650 |
| chr5 | 71416850 | 71416950 | 1090-Lng-B-T | 136  | chr5:71416850-71416950 |
| chr5 | 71744850 | 71744950 | 901-Lng-C-T  | 97   | chr5:71744850-71744950 |
| chr5 | 71872750 | 71872850 | 1274-Lng-A-T | 69   | chr5:71872750-71872850 |
| chr5 | 72089450 | 72089550 | 1274-Lng-A-T | 83   | chr5:72089450-72089550 |
| chr5 | 72108450 | 72108550 | 901-Lng-A-T  | 68   | chr5:72108450-72108550 |
| chr5 | 72426050 | 72426150 | 1223-Lng-A-T | 2048 | chr5:72426050-72426150 |
| chr5 | 72625450 | 72625550 | 1072-Lng-A-T | 127  | chr5:72625450-72625550 |
| chr5 | 72640550 | 72640650 | 1065-Lng-B-T | 85   | chr5:72640550-72640650 |
| chr5 | 72668750 | 72668850 | 1151-Lng-A-T | 79   | chr5:72668750-72668850 |
| chr5 | 72748450 | 72748550 | 846-Lng-A-T  | 118  | chr5:72748450-72748550 |

**Table S2: SB Insertion regions**

|      |          |          |              |     |                        |
|------|----------|----------|--------------|-----|------------------------|
| chr5 | 72887550 | 72887650 | 901-Lng-A-T  | 82  | chr5:72887550-72887650 |
| chr5 | 72914950 | 72915050 | 1065-Lng-B-T | 51  | chr5:72914950-72915050 |
| chr5 | 72932150 | 72932250 | 846-Lng-A-T  | 49  | chr5:72932150-72932250 |
| chr5 | 73239150 | 73239250 | 1072-Lng-A-T | 95  | chr5:73239150-73239250 |
| chr5 | 73486450 | 73486550 | 1151-Lng-A-T | 141 | chr5:73486450-73486550 |
| chr5 | 73526150 | 73526250 | 1065-Lng-C-T | 95  | chr5:73526150-73526250 |
| chr5 | 73590650 | 73590750 | 1065-Lng-A-T | 40  | chr5:73590650-73590750 |
| chr5 | 73636050 | 73636150 | 1188-Lng-A-T | 149 | chr5:73636050-73636150 |
| chr5 | 73709450 | 73709550 | 1223-Lng-D-T | 61  | chr5:73709450-73709550 |
| chr5 | 74122850 | 74122950 | 1065-Lng-C-T | 70  | chr5:74122850-74122950 |
| chr5 | 74432750 | 74432850 | 1223-Lng-D-T | 239 | chr5:74432750-74432850 |
| chr5 | 74451950 | 74452050 | 1188-Lng-A-T | 40  | chr5:74451950-74452050 |
| chr5 | 74456650 | 74456750 | 1152-Lng-A-T | 53  | chr5:74456650-74456750 |
| chr5 | 74776050 | 74776150 | 1223-Lng-A-T | 231 | chr5:74776050-74776150 |
| chr5 | 74811950 | 74812050 | 1151-Lng-A-T | 54  | chr5:74811950-74812050 |
| chr5 | 74951350 | 74951450 | 1004-Lng-A-T | 53  | chr5:74951350-74951450 |
| chr5 | 74951550 | 74951650 | 901-Lng-A-T  | 161 | chr5:74951550-74951650 |
| chr5 | 74967950 | 74968050 | 1065-Lng-C-T | 63  | chr5:74967950-74968050 |
| chr5 | 75075450 | 75075550 | 1072-Lng-A-T | 74  | chr5:75075450-75075550 |
| chr5 | 75140650 | 75140750 | 1188-Lng-A-T | 36  | chr5:75140650-75140750 |
| chr5 | 75356550 | 75356650 | 1065-Lng-A-T | 148 | chr5:75356550-75356650 |
| chr5 | 75401650 | 75401750 | 901-Lng-A-T  | 241 | chr5:75401650-75401750 |
| chr5 | 75413450 | 75413550 | 1223-Lng-A-T | 76  | chr5:75413450-75413550 |
| chr5 | 75431150 | 75431250 | 1167-Lng-A-T | 45  | chr5:75431150-75431250 |
| chr5 | 75932550 | 75932650 | 1065-Lng-B-T | 43  | chr5:75932550-75932650 |
| chr5 | 76009350 | 76009450 | 1152-Lng-A-T | 68  | chr5:76009350-76009450 |
| chr5 | 76365650 | 76365750 | 1223-Lng-C-T | 47  | chr5:76365650-76365750 |
| chr5 | 76379650 | 76379750 | 1274-Lng-A-T | 108 | chr5:76379650-76379750 |
| chr5 | 76533350 | 76533450 | 1223-Lng-C-T | 46  | chr5:76533350-76533450 |
| chr5 | 76725750 | 76725850 | 1274-Lng-A-T | 181 | chr5:76725750-76725850 |
| chr5 | 77021650 | 77021750 | 846-Lng-A-T  | 169 | chr5:77021650-77021750 |
| chr5 | 77156150 | 77156250 | 1090-Lng-A-T | 93  | chr5:77156150-77156250 |
| chr5 | 77356650 | 77356750 | 1151-Lng-A-T | 54  | chr5:77356650-77356750 |
| chr5 | 77390250 | 77390350 | 1100-Lng-A-T | 188 | chr5:77390250-77390350 |
| chr5 | 77754450 | 77754550 | 901-Lng-D-T  | 211 | chr5:77754450-77754550 |
| chr5 | 78240550 | 78240650 | 1100-Lng-B-T | 108 | chr5:78240550-78240650 |
| chr5 | 78336350 | 78336450 | 1065-Lng-B-T | 90  | chr5:78336350-78336450 |
| chr5 | 78374150 | 78374250 | 901-Lng-D-T  | 120 | chr5:78374150-78374250 |
| chr5 | 78410050 | 78410150 | 1223-Lng-B-T | 44  | chr5:78410050-78410150 |
| chr5 | 79033650 | 79033750 | 846-Lng-A-T  | 162 | chr5:79033650-79033750 |
| chr5 | 79103650 | 79103750 | 1274-Lng-A-T | 56  | chr5:79103650-79103750 |
| chr5 | 79273450 | 79273550 | 1223-Lng-B-T | 42  | chr5:79273450-79273550 |
| chr5 | 79341750 | 79341850 | 1152-Lng-A-T | 41  | chr5:79341750-79341850 |
| chr5 | 79558850 | 79558950 | 901-Lng-D-T  | 66  | chr5:79558850-79558950 |
| chr5 | 79820650 | 79820750 | 1065-Lng-B-T | 49  | chr5:79820650-79820750 |
| chr5 | 80000550 | 80000650 | 1152-Lng-A-T | 116 | chr5:80000550-80000650 |

**Table S2: SB Insertion regions**

|      |          |          |              |     |                        |
|------|----------|----------|--------------|-----|------------------------|
| chr5 | 80192650 | 80192750 | 1065-Lng-A-T | 73  | chr5:80192650-80192750 |
| chr5 | 80242650 | 80242750 | 1152-Lng-A-T | 123 | chr5:80242650-80242750 |
| chr5 | 80399350 | 80399450 | 1151-Lng-A-T | 55  | chr5:80399350-80399450 |
| chr5 | 80427650 | 80427750 | 1152-Lng-A-T | 125 | chr5:80427650-80427750 |
| chr5 | 80458850 | 80458950 | 1188-Lng-A-T | 39  | chr5:80458850-80458950 |
| chr5 | 80648050 | 80648150 | 1004-Lng-A-T | 87  | chr5:80648050-80648150 |
| chr5 | 80648250 | 80648350 | 1223-Lng-B-T | 41  | chr5:80648250-80648350 |
| chr5 | 80685250 | 80685350 | 1223-Lng-D-T | 53  | chr5:80685250-80685350 |
| chr5 | 80772250 | 80772350 | 1065-Lng-C-T | 66  | chr5:80772250-80772350 |
| chr5 | 80783450 | 80783550 | 1152-Lng-A-T | 61  | chr5:80783450-80783550 |
| chr5 | 80875350 | 80875450 | 901-Lng-B-T  | 173 | chr5:80875350-80875450 |
| chr5 | 81063450 | 81063550 | 901-Lng-A-T  | 108 | chr5:81063450-81063550 |
| chr5 | 81131650 | 81131750 | 901-Lng-A-T  | 114 | chr5:81131650-81131750 |
| chr5 | 81414550 | 81414650 | 1065-Lng-B-T | 118 | chr5:81414550-81414650 |
| chr5 | 81592150 | 81592250 | 1223-Lng-C-T | 45  | chr5:81592150-81592250 |
| chr5 | 81655050 | 81655150 | 846-Lng-A-T  | 166 | chr5:81655050-81655150 |
| chr5 | 81661150 | 81661250 | 1090-Lng-A-T | 867 | chr5:81661150-81661250 |
| chr5 | 81769750 | 81769850 | 1274-Lng-A-T | 49  | chr5:81769750-81769850 |
| chr5 | 81792650 | 81792750 | 1152-Lng-A-T | 36  | chr5:81792650-81792750 |
| chr5 | 81946650 | 81946750 | 901-Lng-B-T  | 38  | chr5:81946650-81946750 |
| chr5 | 82385650 | 82385750 | 1100-Lng-A-T | 66  | chr5:82385650-82385750 |
| chr5 | 82475550 | 82475650 | 1065-Lng-A-T | 58  | chr5:82475550-82475650 |
| chr5 | 82538650 | 82538750 | 1090-Lng-A-T | 106 | chr5:82538650-82538750 |
| chr5 | 82699350 | 82699450 | 1188-Lng-A-T | 44  | chr5:82699350-82699450 |
| chr5 | 82753450 | 82753550 | 1065-Lng-B-T | 39  | chr5:82753450-82753550 |
| chr5 | 82801850 | 82801950 | 901-Lng-A-T  | 113 | chr5:82801850-82801950 |
| chr5 | 82803750 | 82803850 | 1152-Lng-A-T | 95  | chr5:82803750-82803850 |
| chr5 | 82852550 | 82852650 | 1188-Lng-A-T | 79  | chr5:82852550-82852650 |
| chr5 | 82900050 | 82900150 | 1065-Lng-A-T | 109 | chr5:82900050-82900150 |
| chr5 | 83427150 | 83427250 | 1223-Lng-A-T | 71  | chr5:83427150-83427250 |
| chr5 | 83486950 | 83487050 | 1090-Lng-B-T | 289 | chr5:83486950-83487050 |
| chr5 | 83503350 | 83503450 | 1188-Lng-A-T | 228 | chr5:83503350-83503450 |
| chr5 | 83564250 | 83564350 | 1090-Lng-A-T | 871 | chr5:83564250-83564350 |
| chr5 | 83655550 | 83655650 | 1072-Lng-A-T | 66  | chr5:83655550-83655650 |
| chr5 | 83738350 | 83738450 | 1090-Lng-A-T | 85  | chr5:83738350-83738450 |
| chr5 | 83943650 | 83943750 | 1223-Lng-A-T | 165 | chr5:83943650-83943750 |
| chr5 | 84027850 | 84027950 | 1004-Lng-A-T | 62  | chr5:84027850-84027950 |
| chr5 | 84076250 | 84076350 | 1072-Lng-A-T | 275 | chr5:84076250-84076350 |
| chr5 | 84153350 | 84153450 | 1167-Lng-A-T | 55  | chr5:84153350-84153450 |
| chr5 | 84172650 | 84172750 | 846-Lng-A-T  | 131 | chr5:84172650-84172750 |
| chr5 | 84208150 | 84208250 | 901-Lng-A-T  | 457 | chr5:84208150-84208250 |
| chr5 | 84373250 | 84373350 | 1274-Lng-A-T | 55  | chr5:84373250-84373350 |
| chr5 | 84387550 | 84387650 | 901-Lng-B-T  | 87  | chr5:84387550-84387650 |
| chr5 | 84520450 | 84520550 | 901-Lng-B-T  | 261 | chr5:84520450-84520550 |
| chr5 | 84811350 | 84811450 | 1004-Lng-A-T | 66  | chr5:84811350-84811450 |
| chr5 | 84851750 | 84851850 | 1090-Lng-A-T | 65  | chr5:84851750-84851850 |

**Table S2: SB Insertion regions**

|      |          |          |              |     |                        |
|------|----------|----------|--------------|-----|------------------------|
| chr5 | 84889350 | 84889450 | 1223-Lng-B-T | 55  | chr5:84889350-84889450 |
| chr5 | 85023050 | 85023150 | 1100-Lng-A-T | 75  | chr5:85023050-85023150 |
| chr5 | 85135450 | 85135550 | 1090-Lng-A-T | 113 | chr5:85135450-85135550 |
| chr5 | 85283550 | 85283650 | 901-Lng-C-T  | 31  | chr5:85283550-85283650 |
| chr5 | 85431350 | 85431450 | 1065-Lng-B-T | 59  | chr5:85431350-85431450 |
| chr5 | 85461550 | 85461650 | 1223-Lng-B-T | 63  | chr5:85461550-85461650 |
| chr5 | 85517850 | 85517950 | 1065-Lng-A-T | 81  | chr5:85517850-85517950 |
| chr5 | 85585850 | 85585950 | 1065-Lng-B-T | 74  | chr5:85585850-85585950 |
| chr5 | 85767150 | 85767250 | 901-Lng-A-T  | 123 | chr5:85767150-85767250 |
| chr5 | 85914550 | 85914650 | 1065-Lng-A-T | 114 | chr5:85914550-85914650 |
| chr5 | 86140650 | 86140750 | 1223-Lng-B-T | 35  | chr5:86140650-86140750 |
| chr5 | 86193750 | 86193850 | 1100-Lng-B-T | 50  | chr5:86193750-86193850 |
| chr5 | 86230750 | 86230850 | 901-Lng-A-T  | 50  | chr5:86230750-86230850 |
| chr5 | 86313850 | 86313950 | 1090-Lng-A-T | 62  | chr5:86313850-86313950 |
| chr5 | 86491950 | 86492050 | 1065-Lng-B-T | 67  | chr5:86491950-86492050 |
| chr5 | 86543850 | 86543950 | 1072-Lng-A-T | 52  | chr5:86543850-86543950 |
| chr5 | 86923350 | 86923450 | 901-Lng-B-T  | 153 | chr5:86923350-86923450 |
| chr5 | 86926850 | 86926950 | 1090-Lng-A-T | 46  | chr5:86926850-86926950 |
| chr5 | 87014750 | 87014850 | 901-Lng-A-T  | 90  | chr5:87014750-87014850 |
| chr5 | 87193950 | 87194050 | 901-Lng-A-T  | 95  | chr5:87193950-87194050 |
| chr5 | 87219150 | 87219250 | 1072-Lng-A-T | 64  | chr5:87219150-87219250 |
| chr5 | 87242050 | 87242150 | 1065-Lng-B-T | 48  | chr5:87242050-87242150 |
| chr5 | 87246650 | 87246750 | 901-Lng-C-T  | 29  | chr5:87246650-87246750 |
| chr5 | 87261350 | 87261450 | 1223-Lng-B-T | 34  | chr5:87261350-87261450 |
| chr5 | 87340450 | 87340550 | 1274-Lng-A-T | 80  | chr5:87340450-87340550 |
| chr5 | 87506650 | 87506750 | 1188-Lng-A-T | 34  | chr5:87506650-87506750 |
| chr5 | 87991650 | 87991750 | 1065-Lng-A-T | 36  | chr5:87991650-87991750 |
| chr5 | 88154350 | 88154450 | 1274-Lng-A-T | 63  | chr5:88154350-88154450 |
| chr5 | 88396350 | 88396450 | 1072-Lng-A-T | 111 | chr5:88396350-88396450 |
| chr5 | 88508150 | 88508250 | 1065-Lng-B-T | 198 | chr5:88508150-88508250 |
| chr5 | 88562650 | 88562750 | 1065-Lng-C-T | 85  | chr5:88562650-88562750 |
| chr5 | 88613550 | 88613650 | 1151-Lng-A-T | 57  | chr5:88613550-88613650 |
| chr5 | 89000850 | 89000950 | 1223-Lng-C-T | 414 | chr5:89000850-89000950 |
| chr5 | 89021050 | 89021150 | 901-Lng-A-T  | 58  | chr5:89021050-89021150 |
| chr5 | 89031850 | 89031950 | 1090-Lng-A-T | 147 | chr5:89031850-89031950 |
| chr5 | 89058850 | 89058950 | 1223-Lng-B-T | 270 | chr5:89058850-89058950 |
| chr5 | 89088150 | 89088250 | 1065-Lng-A-T | 155 | chr5:89088150-89088250 |
| chr5 | 89095150 | 89095250 | 1004-Lng-A-T | 80  | chr5:89095150-89095250 |
| chr5 | 89159050 | 89159150 | 1188-Lng-A-T | 218 | chr5:89159050-89159150 |
| chr5 | 89176950 | 89177050 | 1090-Lng-A-T | 52  | chr5:89176950-89177050 |
| chr5 | 89177450 | 89177550 | 1188-Lng-A-T | 36  | chr5:89177450-89177550 |
| chr5 | 89178950 | 89179050 | 1100-Lng-A-T | 136 | chr5:89178950-89179050 |
| chr5 | 89339350 | 89339450 | 1223-Lng-C-T | 62  | chr5:89339350-89339450 |
| chr5 | 89396250 | 89396350 | 1004-Lng-A-T | 78  | chr5:89396250-89396350 |
| chr5 | 89408650 | 89408750 | 1223-Lng-D-T | 43  | chr5:89408650-89408750 |
| chr5 | 89418750 | 89418850 | 1223-Lng-B-T | 242 | chr5:89418750-89418850 |

**Table S2: SB Insertion regions**

|      |          |          |              |       |                        |
|------|----------|----------|--------------|-------|------------------------|
| chr5 | 90187050 | 90187150 | 1152-Lng-A-T | 55    | chr5:90187050-90187150 |
| chr5 | 90298250 | 90298350 | 1223-Lng-B-T | 34    | chr5:90298250-90298350 |
| chr5 | 90489950 | 90490050 | 1065-Lng-B-T | 46    | chr5:90489950-90490050 |
| chr5 | 90712750 | 90712850 | 1274-Lng-A-T | 132   | chr5:90712750-90712850 |
| chr5 | 90721150 | 90721250 | 1065-Lng-C-T | 66    | chr5:90721150-90721250 |
| chr5 | 90755950 | 90756050 | 1274-Lng-A-T | 58    | chr5:90755950-90756050 |
| chr5 | 90772150 | 90772250 | 1065-Lng-B-T | 47    | chr5:90772150-90772250 |
| chr5 | 90805350 | 90805450 | 1151-Lng-A-T | 157   | chr5:90805350-90805450 |
| chr5 | 90889150 | 90889250 | 1004-Lng-A-T | 115   | chr5:90889150-90889250 |
| chr5 | 91056250 | 91056350 | 1223-Lng-D-T | 54    | chr5:91056250-91056350 |
| chr5 | 91062350 | 91062450 | 1100-Lng-B-T | 7491  | chr5:91062350-91062450 |
| chr5 | 91065250 | 91065350 | 1223-Lng-A-T | 103   | chr5:91065250-91065350 |
| chr5 | 91138250 | 91138350 | 901-Lng-B-T  | 235   | chr5:91138250-91138350 |
| chr5 | 91161750 | 91161850 | 1100-Lng-B-T | 61    | chr5:91161750-91161850 |
| chr5 | 91186850 | 91186950 | 901-Lng-C-T  | 39    | chr5:91186850-91186950 |
| chr5 | 91223650 | 91223750 | 1151-Lng-A-T | 13552 | chr5:91223650-91223750 |
| chr5 | 91233250 | 91233350 | 1274-Lng-A-T | 237   | chr5:91233250-91233350 |
| chr5 | 91353350 | 91353450 | 1065-Lng-B-T | 69    | chr5:91353350-91353450 |
| chr5 | 91365550 | 91365650 | 1004-Lng-A-T | 70    | chr5:91365550-91365650 |
| chr5 | 91366350 | 91366450 | 1167-Lng-A-T | 51    | chr5:91366350-91366450 |
| chr5 | 91369050 | 91369150 | 1223-Lng-D-T | 43    | chr5:91369050-91369150 |
| chr5 | 91447850 | 91447950 | 1223-Lng-C-T | 73    | chr5:91447850-91447950 |
| chr5 | 91533250 | 91533350 | 901-Lng-B-T  | 939   | chr5:91533250-91533350 |
| chr5 | 91611050 | 91611150 | 901-Lng-B-T  | 274   | chr5:91611050-91611150 |
| chr5 | 91673350 | 91673450 | 1004-Lng-A-T | 62    | chr5:91673350-91673450 |
| chr5 | 91715450 | 91715550 | 1004-Lng-A-T | 104   | chr5:91715450-91715550 |
| chr5 | 91859550 | 91859650 | 1004-Lng-A-T | 91    | chr5:91859550-91859650 |
| chr5 | 92452050 | 92452150 | 1090-Lng-B-T | 601   | chr5:92452050-92452150 |
| chr5 | 92476750 | 92476850 | 1090-Lng-A-T | 48    | chr5:92476750-92476850 |
| chr5 | 92486150 | 92486250 | 1167-Lng-A-T | 136   | chr5:92486150-92486250 |
| chr5 | 92604550 | 92604650 | 1065-Lng-B-T | 112   | chr5:92604550-92604650 |
| chr5 | 92611450 | 92611550 | 1188-Lng-A-T | 39    | chr5:92611450-92611550 |
| chr5 | 92618150 | 92618250 | 1223-Lng-B-T | 44    | chr5:92618150-92618250 |
| chr5 | 92892450 | 92892550 | 1223-Lng-D-T | 40    | chr5:92892450-92892550 |
| chr5 | 92900550 | 92900650 | 1223-Lng-B-T | 74    | chr5:92900550-92900650 |
| chr5 | 92903850 | 92903950 | 901-Lng-A-T  | 386   | chr5:92903850-92903950 |
| chr5 | 92932150 | 92932250 | 1065-Lng-C-T | 1792  | chr5:92932150-92932250 |
| chr5 | 93120650 | 93120750 | 1223-Lng-A-T | 105   | chr5:93120650-93120750 |
| chr5 | 93245650 | 93245750 | 1274-Lng-A-T | 306   | chr5:93245650-93245750 |
| chr5 | 93274550 | 93274650 | 901-Lng-B-T  | 89    | chr5:93274550-93274650 |
| chr5 | 93362850 | 93362950 | 901-Lng-B-T  | 144   | chr5:93362850-93362950 |
| chr5 | 93365950 | 93366050 | 1100-Lng-A-T | 188   | chr5:93365950-93366050 |
| chr5 | 93387950 | 93388050 | 901-Lng-A-T  | 57    | chr5:93387950-93388050 |
| chr5 | 93466950 | 93467050 | 1151-Lng-A-T | 570   | chr5:93466950-93467050 |
| chr5 | 93476350 | 93476450 | 1090-Lng-A-T | 60    | chr5:93476350-93476450 |
| chr5 | 93528550 | 93528650 | 901-Lng-C-T  | 39    | chr5:93528550-93528650 |

**Table S2: SB Insertion regions**

|      |           |           |              |      |                          |
|------|-----------|-----------|--------------|------|--------------------------|
| chr5 | 93544250  | 93544350  | 1090-Lng-A-T | 52   | chr5:93544250-93544350   |
| chr5 | 93613650  | 93613750  | 1274-Lng-A-T | 109  | chr5:93613650-93613750   |
| chr5 | 93626750  | 93626850  | 1065-Lng-C-T | 86   | chr5:93626750-93626850   |
| chr5 | 93634150  | 93634250  | 1151-Lng-A-T | 125  | chr5:93634150-93634250   |
| chr5 | 93666050  | 93666150  | 1274-Lng-A-T | 57   | chr5:93666050-93666150   |
| chr5 | 94050550  | 94050650  | 1065-Lng-C-T | 96   | chr5:94050550-94050650   |
| chr5 | 94053850  | 94053950  | 901-Lng-B-T  | 37   | chr5:94053850-94053950   |
| chr5 | 94120750  | 94120850  | 1090-Lng-A-T | 94   | chr5:94120750-94120850   |
| chr5 | 94897450  | 94897550  | 1223-Lng-B-T | 214  | chr5:94897450-94897550   |
| chr5 | 95124350  | 95124450  | 901-Lng-D-T  | 311  | chr5:95124350-95124450   |
| chr5 | 95932950  | 95933050  | 1100-Lng-A-T | 63   | chr5:95932950-95933050   |
| chr5 | 96339650  | 96339750  | 1223-Lng-C-T | 43   | chr5:96339650-96339750   |
| chr5 | 96559850  | 96559950  | 1004-Lng-A-T | 500  | chr5:96559850-96559950   |
| chr5 | 96586850  | 96586950  | 901-Lng-B-T  | 179  | chr5:96586850-96586950   |
| chr5 | 96696250  | 96696350  | 1152-Lng-A-T | 129  | chr5:96696250-96696350   |
| chr5 | 96966750  | 96966850  | 1090-Lng-A-T | 80   | chr5:96966750-96966850   |
| chr5 | 97039250  | 97039350  | 1223-Lng-A-T | 115  | chr5:97039250-97039350   |
| chr5 | 97147750  | 97147850  | 901-Lng-C-T  | 37   | chr5:97147750-97147850   |
| chr5 | 97237550  | 97237650  | 1100-Lng-A-T | 73   | chr5:97237550-97237650   |
| chr5 | 97241250  | 97241350  | 1223-Lng-A-T | 1533 | chr5:97241250-97241350   |
| chr5 | 97262750  | 97262850  | 1274-Lng-A-T | 132  | chr5:97262750-97262850   |
| chr5 | 97435350  | 97435450  | 1004-Lng-A-T | 255  | chr5:97435350-97435450   |
| chr5 | 97454050  | 97454150  | 1065-Lng-B-T | 64   | chr5:97454050-97454150   |
| chr5 | 97464150  | 97464250  | 1188-Lng-A-T | 35   | chr5:97464150-97464250   |
| chr5 | 97847750  | 97847850  | 1065-Lng-C-T | 93   | chr5:97847750-97847850   |
| chr5 | 97872050  | 97872150  | 1274-Lng-A-T | 59   | chr5:97872050-97872150   |
| chr5 | 97955350  | 97955450  | 1072-Lng-A-T | 49   | chr5:97955350-97955450   |
| chr5 | 98052350  | 98052450  | 1274-Lng-A-T | 58   | chr5:98052350-98052450   |
| chr5 | 98337550  | 98337650  | 1152-Lng-A-T | 298  | chr5:98337550-98337650   |
| chr5 | 98427250  | 98427350  | 1004-Lng-A-T | 52   | chr5:98427250-98427350   |
| chr5 | 98453350  | 98453450  | 1223-Lng-B-T | 154  | chr5:98453350-98453450   |
| chr5 | 98453350  | 98453450  | 1223-Lng-C-T | 46   | chr5:98453350-98453450   |
| chr5 | 98683650  | 98683750  | 901-Lng-A-T  | 211  | chr5:98683650-98683750   |
| chr5 | 98690250  | 98690350  | 1072-Lng-A-T | 66   | chr5:98690250-98690350   |
| chr5 | 98793350  | 98793450  | 1065-Lng-C-T | 94   | chr5:98793350-98793450   |
| chr5 | 98846350  | 98846450  | 901-Lng-A-T  | 59   | chr5:98846350-98846450   |
| chr5 | 99109950  | 99110050  | 901-Lng-C-T  | 159  | chr5:99109950-99110050   |
| chr5 | 99248450  | 99248550  | 1167-Lng-A-T | 52   | chr5:99248450-99248550   |
| chr5 | 99268350  | 99268450  | 901-Lng-A-T  | 210  | chr5:99268350-99268450   |
| chr5 | 99290350  | 99290450  | 901-Lng-D-T  | 167  | chr5:99290350-99290450   |
| chr5 | 99293750  | 99293850  | 901-Lng-D-T  | 144  | chr5:99293750-99293850   |
| chr5 | 99501150  | 99501250  | 901-Lng-A-T  | 116  | chr5:99501150-99501250   |
| chr5 | 99648450  | 99648550  | 1065-Lng-A-T | 61   | chr5:99648450-99648550   |
| chr5 | 100323350 | 100323450 | 1090-Lng-A-T | 73   | chr5:100323350-100323450 |
| chr5 | 100381450 | 100381550 | 901-Lng-A-T  | 75   | chr5:100381450-100381550 |
| chr5 | 100503150 | 100503250 | 1274-Lng-A-T | 56   | chr5:100503150-100503250 |



**Table S2: SB Insertion regions**

|      |           |           |              |      |                          |
|------|-----------|-----------|--------------|------|--------------------------|
| chr5 | 100823250 | 100823350 | 1188-Lng-A-T | 41   | chr5:100823250-100823350 |
| chr5 | 101041150 | 101041250 | 1152-Lng-A-T | 72   | chr5:101041150-101041250 |
| chr5 | 101632850 | 101632950 | 901-Lng-A-T  | 138  | chr5:101632850-101632950 |
| chr5 | 101652250 | 101652350 | 1065-Lng-A-T | 131  | chr5:101652250-101652350 |
| chr5 | 101932550 | 101932650 | 1065-Lng-B-T | 67   | chr5:101932550-101932650 |
| chr5 | 102030850 | 102030950 | 901-Lng-B-T  | 87   | chr5:102030850-102030950 |
| chr5 | 102072350 | 102072450 | 901-Lng-A-T  | 50   | chr5:102072350-102072450 |
| chr5 | 102096150 | 102096250 | 901-Lng-A-T  | 288  | chr5:102096150-102096250 |
| chr5 | 102203150 | 102203250 | 1065-Lng-B-T | 100  | chr5:102203150-102203250 |
| chr5 | 102215650 | 102215750 | 901-Lng-A-T  | 131  | chr5:102215650-102215750 |
| chr5 | 102253350 | 102253450 | 1152-Lng-A-T | 112  | chr5:102253350-102253450 |
| chr5 | 102348550 | 102348650 | 1223-Lng-A-T | 59   | chr5:102348550-102348650 |
| chr5 | 102436650 | 102436750 | 1100-Lng-A-T | 130  | chr5:102436650-102436750 |
| chr5 | 102460950 | 102461050 | 1072-Lng-A-T | 61   | chr5:102460950-102461050 |
| chr5 | 102474150 | 102474250 | 1188-Lng-A-T | 49   | chr5:102474150-102474250 |
| chr5 | 102480350 | 102480450 | 846-Lng-A-T  | 1679 | chr5:102480350-102480450 |
| chr5 | 102480450 | 102480550 | 1274-Lng-A-T | 238  | chr5:102480450-102480550 |
| chr5 | 103000650 | 103000750 | 1151-Lng-A-T | 193  | chr5:103000650-103000750 |
| chr5 | 103102250 | 103102350 | 1100-Lng-A-T | 104  | chr5:103102250-103102350 |
| chr5 | 103448550 | 103448650 | 901-Lng-A-T  | 108  | chr5:103448550-103448650 |
| chr5 | 103895850 | 103895950 | 1004-Lng-A-T | 83   | chr5:103895850-103895950 |
| chr5 | 103916750 | 103916850 | 1100-Lng-A-T | 86   | chr5:103916750-103916850 |
| chr5 | 104029750 | 104029850 | 901-Lng-D-T  | 155  | chr5:104029750-104029850 |
| chr5 | 104109950 | 104110050 | 1274-Lng-A-T | 86   | chr5:104109950-104110050 |
| chr5 | 104123050 | 104123150 | 1065-Lng-B-T | 63   | chr5:104123050-104123150 |
| chr5 | 104137450 | 104137550 | 1274-Lng-A-T | 70   | chr5:104137450-104137550 |
| chr5 | 104143050 | 104143150 | 1090-Lng-B-T | 647  | chr5:104143050-104143150 |
| chr5 | 104149850 | 104149950 | 1100-Lng-A-T | 85   | chr5:104149850-104149950 |
| chr5 | 104178450 | 104178550 | 1151-Lng-A-T | 293  | chr5:104178450-104178550 |
| chr5 | 104185650 | 104185750 | 1188-Lng-A-T | 299  | chr5:104185650-104185750 |
| chr5 | 104230650 | 104230750 | 901-Lng-A-T  | 106  | chr5:104230650-104230750 |
| chr5 | 104234850 | 104234950 | 1274-Lng-A-T | 159  | chr5:104234850-104234950 |
| chr5 | 104251950 | 104252050 | 1151-Lng-A-T | 56   | chr5:104251950-104252050 |
| chr5 | 104255550 | 104255650 | 1072-Lng-A-T | 144  | chr5:104255550-104255650 |
| chr5 | 104439950 | 104440050 | 1151-Lng-A-T | 64   | chr5:104439950-104440050 |
| chr5 | 104448550 | 104448650 | 1065-Lng-A-T | 42   | chr5:104448550-104448650 |
| chr5 | 104897650 | 104897750 | 901-Lng-C-T  | 48   | chr5:104897650-104897750 |
| chr5 | 104915850 | 104915950 | 1188-Lng-A-T | 34   | chr5:104915850-104915950 |
| chr5 | 105002850 | 105002950 | 901-Lng-A-T  | 113  | chr5:105002850-105002950 |
| chr5 | 105158350 | 105158450 | 901-Lng-C-T  | 125  | chr5:105158350-105158450 |
| chr5 | 105277350 | 105277450 | 1223-Lng-B-T | 35   | chr5:105277350-105277450 |
| chr5 | 105288150 | 105288250 | 1065-Lng-B-T | 59   | chr5:105288150-105288250 |
| chr5 | 105572950 | 105573050 | 1151-Lng-A-T | 81   | chr5:105572950-105573050 |
| chr5 | 105680550 | 105680650 | 901-Lng-C-T  | 38   | chr5:105680550-105680650 |
| chr5 | 105788350 | 105788450 | 901-Lng-C-T  | 33   | chr5:105788350-105788450 |
| chr5 | 105982350 | 105982450 | 1100-Lng-A-T | 126  | chr5:105982350-105982450 |

**Table S2: SB Insertion regions**

|      |           |           |              |      |                          |
|------|-----------|-----------|--------------|------|--------------------------|
| chr5 | 106264050 | 106264150 | 1223-Lng-C-T | 50   | chr5:106264050-106264150 |
| chr5 | 106316550 | 106316650 | 1151-Lng-A-T | 209  | chr5:106316550-106316650 |
| chr5 | 106326350 | 106326450 | 1100-Lng-A-T | 183  | chr5:106326350-106326450 |
| chr5 | 106329250 | 106329350 | 1223-Lng-D-T | 79   | chr5:106329250-106329350 |
| chr5 | 106338150 | 106338250 | 1223-Lng-C-T | 44   | chr5:106338150-106338250 |
| chr5 | 106445650 | 106445750 | 1188-Lng-A-T | 34   | chr5:106445650-106445750 |
| chr5 | 107077250 | 107077350 | 901-Lng-D-T  | 1032 | chr5:107077250-107077350 |
| chr5 | 107104050 | 107104150 | 1004-Lng-A-T | 88   | chr5:107104050-107104150 |
| chr5 | 107289350 | 107289450 | 1065-Lng-A-T | 59   | chr5:107289350-107289450 |
| chr5 | 107420850 | 107420950 | 1072-Lng-A-T | 122  | chr5:107420850-107420950 |
| chr5 | 107452550 | 107452650 | 901-Lng-B-T  | 293  | chr5:107452550-107452650 |
| chr5 | 107551650 | 107551750 | 1100-Lng-A-T | 58   | chr5:107551650-107551750 |
| chr5 | 107878950 | 107879050 | 1072-Lng-A-T | 117  | chr5:107878950-107879050 |
| chr5 | 107923050 | 107923150 | 1167-Lng-A-T | 139  | chr5:107923050-107923150 |
| chr5 | 108017450 | 108017550 | 1223-Lng-A-T | 124  | chr5:108017450-108017550 |
| chr5 | 108057450 | 108057550 | 1065-Lng-A-T | 56   | chr5:108057450-108057550 |
| chr5 | 108205450 | 108205550 | 1072-Lng-A-T | 63   | chr5:108205450-108205550 |
| chr5 | 108221350 | 108221450 | 1223-Lng-B-T | 43   | chr5:108221350-108221450 |
| chr5 | 108394350 | 108394450 | 846-Lng-A-T  | 73   | chr5:108394350-108394450 |
| chr5 | 108525450 | 108525550 | 1065-Lng-A-T | 45   | chr5:108525450-108525550 |
| chr5 | 108549550 | 108549650 | 901-Lng-C-T  | 158  | chr5:108549550-108549650 |
| chr5 | 108699650 | 108699750 | 1100-Lng-A-T | 51   | chr5:108699650-108699750 |
| chr5 | 108700150 | 108700250 | 1151-Lng-A-T | 155  | chr5:108700150-108700250 |
| chr5 | 108892350 | 108892450 | 1065-Lng-C-T | 102  | chr5:108892350-108892450 |
| chr5 | 108897450 | 108897550 | 901-Lng-B-T  | 74   | chr5:108897450-108897550 |
| chr5 | 108907250 | 108907350 | 1223-Lng-B-T | 398  | chr5:108907250-108907350 |
| chr5 | 109015650 | 109015750 | 1274-Lng-A-T | 133  | chr5:109015650-109015750 |
| chr5 | 109025850 | 109025950 | 1090-Lng-A-T | 60   | chr5:109025850-109025950 |
| chr5 | 109050750 | 109050850 | 1188-Lng-A-T | 305  | chr5:109050750-109050850 |
| chr5 | 109062650 | 109062750 | 1065-Lng-B-T | 159  | chr5:109062650-109062750 |
| chr5 | 109068950 | 109069050 | 1188-Lng-A-T | 214  | chr5:109068950-109069050 |
| chr5 | 109074550 | 109074650 | 1151-Lng-A-T | 72   | chr5:109074550-109074650 |
| chr5 | 109485150 | 109485250 | 901-Lng-C-T  | 61   | chr5:109485150-109485250 |
| chr5 | 109566150 | 109566250 | 1004-Lng-A-T | 450  | chr5:109566150-109566250 |
| chr5 | 109687850 | 109687950 | 1065-Lng-A-T | 42   | chr5:109687850-109687950 |
| chr5 | 110218350 | 110218450 | 1223-Lng-B-T | 49   | chr5:110218350-110218450 |
| chr5 | 110609650 | 110609750 | 1151-Lng-A-T | 190  | chr5:110609650-110609750 |
| chr5 | 110616850 | 110616950 | 901-Lng-C-T  | 1388 | chr5:110616850-110616950 |
| chr5 | 110631150 | 110631250 | 901-Lng-A-T  | 116  | chr5:110631150-110631250 |
| chr5 | 110667150 | 110667250 | 1065-Lng-A-T | 208  | chr5:110667150-110667250 |
| chr5 | 110720950 | 110721050 | 1223-Lng-B-T | 89   | chr5:110720950-110721050 |
| chr5 | 110856250 | 110856350 | 901-Lng-B-T  | 95   | chr5:110856250-110856350 |
| chr5 | 110878050 | 110878150 | 901-Lng-C-T  | 50   | chr5:110878050-110878150 |
| chr5 | 111197050 | 111197150 | 1274-Lng-A-T | 112  | chr5:111197050-111197150 |
| chr5 | 111201250 | 111201350 | 1072-Lng-A-T | 93   | chr5:111201250-111201350 |
| chr5 | 111246650 | 111246750 | 1274-Lng-A-T | 56   | chr5:111246650-111246750 |

**Table S2: SB Insertion regions**

|      |           |           |              |     |                          |
|------|-----------|-----------|--------------|-----|--------------------------|
| chr5 | 111387250 | 111387350 | 1151-Lng-A-T | 87  | chr5:111387250-111387350 |
| chr5 | 111458550 | 111458650 | 1167-Lng-A-T | 218 | chr5:111458550-111458650 |
| chr5 | 111552950 | 111553050 | 901-Lng-A-T  | 73  | chr5:111552950-111553050 |
| chr5 | 111655850 | 111655950 | 901-Lng-D-T  | 174 | chr5:111655850-111655950 |
| chr5 | 111808350 | 111808450 | 1004-Lng-A-T | 323 | chr5:111808350-111808450 |
| chr5 | 111822850 | 111822950 | 901-Lng-A-T  | 102 | chr5:111822850-111822950 |
| chr5 | 111872650 | 111872750 | 1090-Lng-A-T | 57  | chr5:111872650-111872750 |
| chr5 | 112711050 | 112711150 | 1151-Lng-A-T | 74  | chr5:112711050-112711150 |
| chr5 | 112770850 | 112770950 | 1090-Lng-A-T | 284 | chr5:112770850-112770950 |
| chr5 | 113051450 | 113051550 | 1065-Lng-C-T | 70  | chr5:113051450-113051550 |
| chr5 | 113359950 | 113360050 | 1152-Lng-A-T | 33  | chr5:113359950-113360050 |
| chr5 | 113426450 | 113426550 | 1274-Lng-A-T | 71  | chr5:113426450-113426550 |
| chr5 | 113752950 | 113753050 | 1274-Lng-A-T | 102 | chr5:113752950-113753050 |
| chr5 | 113873950 | 113874050 | 1065-Lng-B-T | 48  | chr5:113873950-113874050 |
| chr5 | 114076650 | 114076750 | 901-Lng-A-T  | 87  | chr5:114076650-114076750 |
| chr5 | 114277450 | 114277550 | 901-Lng-B-T  | 92  | chr5:114277450-114277550 |
| chr5 | 114358050 | 114358150 | 1072-Lng-A-T | 72  | chr5:114358050-114358150 |
| chr5 | 114411850 | 114411950 | 1090-Lng-B-T | 583 | chr5:114411850-114411950 |
| chr5 | 114457550 | 114457650 | 1065-Lng-C-T | 630 | chr5:114457550-114457650 |
| chr5 | 114493550 | 114493650 | 1004-Lng-A-T | 323 | chr5:114493550-114493650 |
| chr5 | 114728750 | 114728850 | 1274-Lng-A-T | 118 | chr5:114728750-114728850 |
| chr5 | 114745950 | 114746050 | 1065-Lng-A-T | 88  | chr5:114745950-114746050 |
| chr5 | 115139550 | 115139650 | 1090-Lng-A-T | 158 | chr5:115139550-115139650 |
| chr5 | 115468650 | 115468750 | 1151-Lng-A-T | 87  | chr5:115468650-115468750 |
| chr5 | 115506950 | 115507050 | 1152-Lng-A-T | 55  | chr5:115506950-115507050 |
| chr5 | 115597350 | 115597450 | 1065-Lng-B-T | 77  | chr5:115597350-115597450 |
| chr5 | 115689350 | 115689450 | 1188-Lng-A-T | 54  | chr5:115689350-115689450 |
| chr5 | 115726850 | 115726950 | 1167-Lng-A-T | 76  | chr5:115726850-115726950 |
| chr5 | 115797350 | 115797450 | 1100-Lng-A-T | 147 | chr5:115797350-115797450 |
| chr5 | 116005950 | 116006050 | 1072-Lng-A-T | 193 | chr5:116005950-116006050 |
| chr5 | 116441050 | 116441150 | 1223-Lng-B-T | 305 | chr5:116441050-116441150 |
| chr5 | 116744450 | 116744550 | 1100-Lng-A-T | 126 | chr5:116744450-116744550 |
| chr5 | 116965350 | 116965450 | 1167-Lng-A-T | 83  | chr5:116965350-116965450 |
| chr5 | 117048950 | 117049050 | 901-Lng-A-T  | 435 | chr5:117048950-117049050 |
| chr5 | 117196750 | 117196850 | 1065-Lng-B-T | 202 | chr5:117196750-117196850 |
| chr5 | 117215350 | 117215450 | 1004-Lng-A-T | 62  | chr5:117215350-117215450 |
| chr5 | 117225650 | 117225750 | 1065-Lng-C-T | 95  | chr5:117225650-117225750 |
| chr5 | 117334250 | 117334350 | 1274-Lng-A-T | 118 | chr5:117334250-117334350 |
| chr5 | 117396850 | 117396950 | 1004-Lng-A-T | 103 | chr5:117396850-117396950 |
| chr5 | 117574950 | 117575050 | 1274-Lng-A-T | 64  | chr5:117574950-117575050 |
| chr5 | 117625250 | 117625350 | 901-Lng-D-T  | 387 | chr5:117625250-117625350 |
| chr5 | 117811550 | 117811650 | 1065-Lng-C-T | 68  | chr5:117811550-117811650 |
| chr5 | 117822050 | 117822150 | 1065-Lng-C-T | 66  | chr5:117822050-117822150 |
| chr5 | 117989050 | 117989150 | 1223-Lng-D-T | 48  | chr5:117989050-117989150 |
| chr5 | 118561550 | 118561650 | 1223-Lng-A-T | 779 | chr5:118561550-118561650 |
| chr5 | 118566150 | 118566250 | 1065-Lng-B-T | 41  | chr5:118566150-118566250 |

**Table S2: SB Insertion regions**

|      |           |           |              |     |                          |
|------|-----------|-----------|--------------|-----|--------------------------|
| chr5 | 118726050 | 118726150 | 1065-Lng-A-T | 51  | chr5:118726050-118726150 |
| chr5 | 118817550 | 118817650 | 901-Lng-A-T  | 92  | chr5:118817550-118817650 |
| chr5 | 118847950 | 118848050 | 1223-Lng-C-T | 51  | chr5:118847950-118848050 |
| chr5 | 118908650 | 118908750 | 1004-Lng-A-T | 742 | chr5:118908650-118908750 |
| chr5 | 119055850 | 119055950 | 1065-Lng-B-T | 58  | chr5:119055850-119055950 |
| chr5 | 119081350 | 119081450 | 901-Lng-C-T  | 55  | chr5:119081350-119081450 |
| chr5 | 119098350 | 119098450 | 1065-Lng-B-T | 39  | chr5:119098350-119098450 |
| chr5 | 119367650 | 119367750 | 1065-Lng-A-T | 88  | chr5:119367650-119367750 |
| chr5 | 119400150 | 119400250 | 1004-Lng-A-T | 75  | chr5:119400150-119400250 |
| chr5 | 119425650 | 119425750 | 1152-Lng-A-T | 34  | chr5:119425650-119425750 |
| chr5 | 119776650 | 119776750 | 901-Lng-D-T  | 163 | chr5:119776650-119776750 |
| chr5 | 121037650 | 121037750 | 1223-Lng-D-T | 47  | chr5:121037650-121037750 |
| chr5 | 121762150 | 121762250 | 1004-Lng-A-T | 52  | chr5:121762150-121762250 |
| chr5 | 121768850 | 121768950 | 901-Lng-C-T  | 229 | chr5:121768850-121768950 |
| chr5 | 121792250 | 121792350 | 1274-Lng-A-T | 173 | chr5:121792250-121792350 |
| chr5 | 121891950 | 121892050 | 901-Lng-C-T  | 48  | chr5:121891950-121892050 |
| chr5 | 121948150 | 121948250 | 1274-Lng-A-T | 51  | chr5:121948150-121948250 |
| chr5 | 121949350 | 121949450 | 1065-Lng-A-T | 79  | chr5:121949350-121949450 |
| chr5 | 122120650 | 122120750 | 1223-Lng-B-T | 54  | chr5:122120650-122120750 |
| chr5 | 122181750 | 122181850 | 1223-Lng-C-T | 49  | chr5:122181750-122181850 |
| chr5 | 122240750 | 122240850 | 1065-Lng-C-T | 66  | chr5:122240750-122240850 |
| chr5 | 122247650 | 122247750 | 901-Lng-A-T  | 64  | chr5:122247650-122247750 |
| chr5 | 122259350 | 122259450 | 1223-Lng-A-T | 140 | chr5:122259350-122259450 |
| chr5 | 122354950 | 122355050 | 1100-Lng-A-T | 176 | chr5:122354950-122355050 |
| chr5 | 122373150 | 122373250 | 1004-Lng-A-T | 96  | chr5:122373150-122373250 |
| chr5 | 122466150 | 122466250 | 1065-Lng-A-T | 75  | chr5:122466150-122466250 |
| chr5 | 122876650 | 122876750 | 1152-Lng-A-T | 111 | chr5:122876650-122876750 |
| chr5 | 122933950 | 122934050 | 1090-Lng-B-T | 687 | chr5:122933950-122934050 |
| chr5 | 122944850 | 122944950 | 901-Lng-A-T  | 124 | chr5:122944850-122944950 |
| chr5 | 122949150 | 122949250 | 1152-Lng-A-T | 78  | chr5:122949150-122949250 |
| chr5 | 123000750 | 123000850 | 901-Lng-A-T  | 59  | chr5:123000750-123000850 |
| chr5 | 123246550 | 123246650 | 1223-Lng-B-T | 41  | chr5:123246550-123246650 |
| chr5 | 123340850 | 123340950 | 1274-Lng-A-T | 138 | chr5:123340850-123340950 |
| chr5 | 123464350 | 123464450 | 901-Lng-C-T  | 268 | chr5:123464350-123464450 |
| chr5 | 123519250 | 123519350 | 1167-Lng-A-T | 321 | chr5:123519250-123519350 |
| chr5 | 123651950 | 123652050 | 1274-Lng-A-T | 210 | chr5:123651950-123652050 |
| chr5 | 123725650 | 123725750 | 1223-Lng-D-T | 51  | chr5:123725650-123725750 |
| chr5 | 123870450 | 123870550 | 901-Lng-C-T  | 65  | chr5:123870450-123870550 |
| chr5 | 124045850 | 124045950 | 1100-Lng-B-T | 69  | chr5:124045850-124045950 |
| chr5 | 124071950 | 124072050 | 901-Lng-A-T  | 66  | chr5:124071950-124072050 |
| chr5 | 124083750 | 124083850 | 1274-Lng-A-T | 53  | chr5:124083750-124083850 |
| chr5 | 124144850 | 124144950 | 1152-Lng-A-T | 52  | chr5:124144850-124144950 |
| chr5 | 124367350 | 124367450 | 1167-Lng-A-T | 80  | chr5:124367350-124367450 |
| chr5 | 124779550 | 124779650 | 901-Lng-B-T  | 63  | chr5:124779550-124779650 |
| chr5 | 124790250 | 124790350 | 1274-Lng-A-T | 107 | chr5:124790250-124790350 |
| chr5 | 124834550 | 124834650 | 1274-Lng-A-T | 90  | chr5:124834550-124834650 |

**Table S2: SB Insertion regions**

|      |           |           |              |     |                          |
|------|-----------|-----------|--------------|-----|--------------------------|
| chr5 | 124846450 | 124846550 | 1223-Lng-A-T | 152 | chr5:124846450-124846550 |
| chr5 | 124870550 | 124870650 | 1151-Lng-A-T | 522 | chr5:124870550-124870650 |
| chr5 | 124993650 | 124993750 | 901-Lng-A-T  | 378 | chr5:124993650-124993750 |
| chr5 | 125241850 | 125241950 | 1274-Lng-A-T | 187 | chr5:125241850-125241950 |
| chr5 | 125360250 | 125360350 | 1065-Lng-A-T | 41  | chr5:125360250-125360350 |
| chr5 | 125388450 | 125388550 | 1090-Lng-A-T | 65  | chr5:125388450-125388550 |
| chr5 | 125440750 | 125440850 | 901-Lng-A-T  | 51  | chr5:125440750-125440850 |
| chr5 | 125604450 | 125604550 | 1065-Lng-A-T | 77  | chr5:125604450-125604550 |
| chr5 | 125645150 | 125645250 | 1223-Lng-A-T | 103 | chr5:125645150-125645250 |
| chr5 | 125719550 | 125719650 | 901-Lng-C-T  | 107 | chr5:125719550-125719650 |
| chr5 | 126166750 | 126166850 | 901-Lng-B-T  | 769 | chr5:126166750-126166850 |
| chr5 | 126193550 | 126193650 | 1151-Lng-A-T | 210 | chr5:126193550-126193650 |
| chr5 | 126343150 | 126343250 | 1072-Lng-A-T | 107 | chr5:126343150-126343250 |
| chr5 | 126412850 | 126412950 | 1065-Lng-A-T | 36  | chr5:126412850-126412950 |
| chr5 | 126635050 | 126635150 | 901-Lng-A-T  | 91  | chr5:126635050-126635150 |
| chr5 | 126754750 | 126754850 | 1152-Lng-A-T | 46  | chr5:126754750-126754850 |
| chr5 | 126815050 | 126815150 | 1152-Lng-A-T | 36  | chr5:126815050-126815150 |
| chr5 | 126931550 | 126931650 | 846-Lng-A-T  | 116 | chr5:126931550-126931650 |
| chr5 | 127003650 | 127003750 | 1274-Lng-A-T | 50  | chr5:127003650-127003750 |
| chr5 | 127007550 | 127007650 | 1274-Lng-A-T | 245 | chr5:127007550-127007650 |
| chr5 | 127131450 | 127131550 | 1065-Lng-B-T | 45  | chr5:127131450-127131550 |
| chr5 | 127200550 | 127200650 | 1274-Lng-A-T | 49  | chr5:127200550-127200650 |
| chr5 | 128071250 | 128071350 | 1152-Lng-A-T | 96  | chr5:128071250-128071350 |
| chr5 | 128095550 | 128095650 | 1223-Lng-D-T | 40  | chr5:128095550-128095650 |
| chr5 | 128098050 | 128098150 | 1152-Lng-A-T | 163 | chr5:128098050-128098150 |
| chr5 | 128314350 | 128314450 | 901-Lng-C-T  | 45  | chr5:128314350-128314450 |
| chr5 | 128487550 | 128487650 | 1152-Lng-A-T | 78  | chr5:128487550-128487650 |
| chr5 | 128511950 | 128512050 | 1223-Lng-B-T | 272 | chr5:128511950-128512050 |
| chr5 | 128651450 | 128651550 | 901-Lng-A-T  | 87  | chr5:128651450-128651550 |
| chr5 | 128745450 | 128745550 | 1065-Lng-B-T | 86  | chr5:128745450-128745550 |
| chr5 | 128880150 | 128880250 | 1152-Lng-A-T | 54  | chr5:128880150-128880250 |
| chr5 | 129409950 | 129410050 | 1090-Lng-B-T | 128 | chr5:129409950-129410050 |
| chr5 | 129415950 | 129416050 | 1004-Lng-A-T | 65  | chr5:129415950-129416050 |
| chr5 | 130020350 | 130020450 | 1004-Lng-A-T | 58  | chr5:130020350-130020450 |
| chr5 | 130285150 | 130285250 | 1274-Lng-A-T | 53  | chr5:130285150-130285250 |
| chr5 | 130533950 | 130534050 | 1152-Lng-A-T | 50  | chr5:130533950-130534050 |
| chr5 | 130547450 | 130547550 | 1274-Lng-A-T | 178 | chr5:130547450-130547550 |
| chr5 | 130563750 | 130563850 | 901-Lng-B-T  | 154 | chr5:130563750-130563850 |
| chr5 | 130712550 | 130712650 | 1100-Lng-A-T | 111 | chr5:130712550-130712650 |
| chr5 | 130833650 | 130833750 | 1274-Lng-A-T | 171 | chr5:130833650-130833750 |
| chr5 | 131098550 | 131098650 | 1152-Lng-A-T | 102 | chr5:131098550-131098650 |
| chr5 | 131156250 | 131156350 | 1065-Lng-C-T | 105 | chr5:131156250-131156350 |
| chr5 | 131283550 | 131283650 | 901-Lng-C-T  | 66  | chr5:131283550-131283650 |
| chr5 | 131396050 | 131396150 | 1223-Lng-B-T | 166 | chr5:131396050-131396150 |
| chr5 | 131398450 | 131398550 | 901-Lng-C-T  | 68  | chr5:131398450-131398550 |
| chr5 | 131560150 | 131560250 | 1223-Lng-D-T | 45  | chr5:131560150-131560250 |

**Table S2: SB Insertion regions**

|      |           |           |              |     |                          |
|------|-----------|-----------|--------------|-----|--------------------------|
| chr5 | 131986250 | 131986350 | 1151-Lng-A-T | 131 | chr5:131986250-131986350 |
| chr5 | 131999250 | 131999350 | 1151-Lng-A-T | 308 | chr5:131999250-131999350 |
| chr5 | 132248850 | 132248950 | 846-Lng-A-T  | 56  | chr5:132248850-132248950 |
| chr5 | 132360250 | 132360350 | 1274-Lng-A-T | 50  | chr5:132360250-132360350 |
| chr5 | 132567350 | 132567450 | 901-Lng-D-T  | 290 | chr5:132567350-132567450 |
| chr5 | 132608450 | 132608550 | 1090-Lng-A-T | 493 | chr5:132608450-132608550 |
| chr5 | 132679150 | 132679250 | 1065-Lng-A-T | 50  | chr5:132679150-132679250 |
| chr5 | 132979650 | 132979750 | 1151-Lng-A-T | 448 | chr5:132979650-132979750 |
| chr5 | 133611250 | 133611350 | 1065-Lng-B-T | 51  | chr5:133611250-133611350 |
| chr5 | 134681450 | 134681550 | 1223-Lng-B-T | 81  | chr5:134681450-134681550 |
| chr5 | 134756450 | 134756550 | 846-Lng-A-T  | 65  | chr5:134756450-134756550 |
| chr5 | 134878350 | 134878450 | 1100-Lng-A-T | 144 | chr5:134878350-134878450 |
| chr5 | 134906650 | 134906750 | 1072-Lng-A-T | 50  | chr5:134906650-134906750 |
| chr5 | 135439850 | 135439950 | 901-Lng-A-T  | 66  | chr5:135439850-135439950 |
| chr5 | 135534050 | 135534150 | 1065-Lng-B-T | 60  | chr5:135534050-135534150 |
| chr5 | 135689850 | 135689950 | 901-Lng-C-T  | 34  | chr5:135689850-135689950 |
| chr5 | 135697350 | 135697450 | 1167-Lng-A-T | 54  | chr5:135697350-135697450 |
| chr5 | 135700450 | 135700550 | 1152-Lng-A-T | 366 | chr5:135700450-135700550 |
| chr5 | 135884550 | 135884650 | 901-Lng-B-T  | 37  | chr5:135884550-135884650 |
| chr5 | 136111450 | 136111550 | 1188-Lng-A-T | 204 | chr5:136111450-136111550 |
| chr5 | 136113750 | 136113850 | 901-Lng-B-T  | 90  | chr5:136113750-136113850 |
| chr5 | 136183150 | 136183250 | 1152-Lng-A-T | 32  | chr5:136183150-136183250 |
| chr5 | 136220950 | 136221050 | 1065-Lng-B-T | 48  | chr5:136220950-136221050 |
| chr5 | 136492450 | 136492550 | 901-Lng-A-T  | 67  | chr5:136492450-136492550 |
| chr5 | 136514050 | 136514150 | 1274-Lng-A-T | 65  | chr5:136514050-136514150 |
| chr5 | 136688350 | 136688450 | 1100-Lng-A-T | 106 | chr5:136688350-136688450 |
| chr5 | 136759250 | 136759350 | 901-Lng-C-T  | 34  | chr5:136759250-136759350 |
| chr5 | 136759250 | 136759350 | 1188-Lng-A-T | 163 | chr5:136759250-136759350 |
| chr5 | 136831350 | 136831450 | 1100-Lng-A-T | 96  | chr5:136831350-136831450 |
| chr5 | 136852450 | 136852550 | 1274-Lng-A-T | 82  | chr5:136852450-136852550 |
| chr5 | 136882950 | 136883050 | 901-Lng-C-T  | 28  | chr5:136882950-136883050 |
| chr5 | 136893050 | 136893150 | 1065-Lng-C-T | 72  | chr5:136893050-136893150 |
| chr5 | 136898750 | 136898850 | 846-Lng-A-T  | 99  | chr5:136898750-136898850 |
| chr5 | 136977950 | 136978050 | 901-Lng-D-T  | 284 | chr5:136977950-136978050 |
| chr5 | 136986050 | 136986150 | 1004-Lng-A-T | 56  | chr5:136986050-136986150 |
| chr5 | 137007150 | 137007250 | 1090-Lng-A-T | 558 | chr5:137007150-137007250 |
| chr5 | 137015250 | 137015350 | 1100-Lng-A-T | 140 | chr5:137015250-137015350 |
| chr5 | 137090550 | 137090650 | 1274-Lng-A-T | 111 | chr5:137090550-137090650 |
| chr5 | 137415750 | 137415850 | 1274-Lng-A-T | 53  | chr5:137415750-137415850 |
| chr5 | 137526250 | 137526350 | 1188-Lng-A-T | 162 | chr5:137526250-137526350 |
| chr5 | 137547950 | 137548050 | 1223-Lng-D-T | 59  | chr5:137547950-137548050 |
| chr5 | 137580450 | 137580550 | 1090-Lng-B-T | 409 | chr5:137580450-137580550 |
| chr5 | 137792050 | 137792150 | 1152-Lng-A-T | 164 | chr5:137792050-137792150 |
| chr5 | 137808350 | 137808450 | 1274-Lng-A-T | 53  | chr5:137808350-137808450 |
| chr5 | 137937750 | 137937850 | 1223-Lng-D-T | 41  | chr5:137937750-137937850 |
| chr5 | 137958450 | 137958550 | 1274-Lng-A-T | 53  | chr5:137958450-137958550 |

**Table S2: SB Insertion regions**

|      |           |           |              |     |                          |
|------|-----------|-----------|--------------|-----|--------------------------|
| chr5 | 138112450 | 138112550 | 901-Lng-A-T  | 127 | chr5:138112450-138112550 |
| chr5 | 138544550 | 138544650 | 1065-Lng-A-T | 46  | chr5:138544550-138544650 |
| chr5 | 138784450 | 138784550 | 1100-Lng-A-T | 160 | chr5:138784450-138784550 |
| chr5 | 138892850 | 138892950 | 1072-Lng-A-T | 54  | chr5:138892850-138892950 |
| chr5 | 139066550 | 139066650 | 1223-Lng-D-T | 44  | chr5:139066550-139066650 |
| chr5 | 139331350 | 139331450 | 1188-Lng-A-T | 167 | chr5:139331350-139331450 |
| chr5 | 139714050 | 139714150 | 901-Lng-A-T  | 79  | chr5:139714050-139714150 |
| chr5 | 140118650 | 140118750 | 1167-Lng-A-T | 54  | chr5:140118650-140118750 |
| chr5 | 140138150 | 140138250 | 901-Lng-A-T  | 50  | chr5:140138150-140138250 |
| chr5 | 140261550 | 140261650 | 1004-Lng-A-T | 100 | chr5:140261550-140261650 |
| chr5 | 140274850 | 140274950 | 1100-Lng-A-T | 207 | chr5:140274850-140274950 |
| chr5 | 140548250 | 140548350 | 1090-Lng-A-T | 58  | chr5:140548250-140548350 |
| chr5 | 140578850 | 140578950 | 1100-Lng-A-T | 69  | chr5:140578850-140578950 |
| chr5 | 140666650 | 140666750 | 1167-Lng-A-T | 80  | chr5:140666650-140666750 |
| chr5 | 140689250 | 140689350 | 1167-Lng-A-T | 71  | chr5:140689250-140689350 |
| chr5 | 140700250 | 140700350 | 1100-Lng-A-T | 57  | chr5:140700250-140700350 |
| chr5 | 140717250 | 140717350 | 1188-Lng-A-T | 40  | chr5:140717250-140717350 |
| chr5 | 140736350 | 140736450 | 1188-Lng-A-T | 38  | chr5:140736350-140736450 |
| chr5 | 141288450 | 141288550 | 1274-Lng-A-T | 79  | chr5:141288450-141288550 |
| chr5 | 141298250 | 141298350 | 1223-Lng-D-T | 690 | chr5:141298250-141298350 |
| chr5 | 141667950 | 141668050 | 1065-Lng-A-T | 37  | chr5:141667950-141668050 |
| chr5 | 141675850 | 141675950 | 901-Lng-C-T  | 215 | chr5:141675850-141675950 |
| chr5 | 142900350 | 142900450 | 1065-Lng-A-T | 67  | chr5:142900350-142900450 |
| chr5 | 142903850 | 142903950 | 1100-Lng-A-T | 80  | chr5:142903850-142903950 |
| chr5 | 143542050 | 143542150 | 1274-Lng-A-T | 91  | chr5:143542050-143542150 |
| chr5 | 143560450 | 143560550 | 1274-Lng-A-T | 125 | chr5:143560450-143560550 |
| chr5 | 143676750 | 143676850 | 1065-Lng-B-T | 75  | chr5:143676750-143676850 |
| chr5 | 143733150 | 143733250 | 1223-Lng-C-T | 954 | chr5:143733150-143733250 |
| chr5 | 143833250 | 143833350 | 1065-Lng-B-T | 43  | chr5:143833250-143833350 |
| chr5 | 143848650 | 143848750 | 901-Lng-C-T  | 55  | chr5:143848650-143848750 |
| chr5 | 143856150 | 143856250 | 1167-Lng-A-T | 64  | chr5:143856150-143856250 |
| chr5 | 143871350 | 143871450 | 1004-Lng-A-T | 69  | chr5:143871350-143871450 |
| chr5 | 144081950 | 144082050 | 1100-Lng-A-T | 88  | chr5:144081950-144082050 |
| chr5 | 144125150 | 144125250 | 1223-Lng-D-T | 55  | chr5:144125150-144125250 |
| chr5 | 144172450 | 144172550 | 1274-Lng-A-T | 70  | chr5:144172450-144172550 |
| chr5 | 144258850 | 144258950 | 901-Lng-C-T  | 46  | chr5:144258850-144258950 |
| chr5 | 144358750 | 144358850 | 1167-Lng-A-T | 121 | chr5:144358750-144358850 |
| chr5 | 144438350 | 144438450 | 901-Lng-B-T  | 65  | chr5:144438350-144438450 |
| chr5 | 144646450 | 144646550 | 846-Lng-A-T  | 53  | chr5:144646450-144646550 |
| chr5 | 144700850 | 144700950 | 1167-Lng-A-T | 53  | chr5:144700850-144700950 |
| chr5 | 144921850 | 144921950 | 1100-Lng-A-T | 80  | chr5:144921850-144921950 |
| chr5 | 144941650 | 144941750 | 1274-Lng-A-T | 76  | chr5:144941650-144941750 |
| chr5 | 144950050 | 144950150 | 1223-Lng-C-T | 86  | chr5:144950050-144950150 |
| chr5 | 144999550 | 144999650 | 1072-Lng-A-T | 223 | chr5:144999550-144999650 |
| chr5 | 145022850 | 145022950 | 1100-Lng-A-T | 87  | chr5:145022850-145022950 |
| chr5 | 145108950 | 145109050 | 1274-Lng-A-T | 63  | chr5:145108950-145109050 |

**Table S2: SB Insertion regions**

|      |           |           |              |      |                          |
|------|-----------|-----------|--------------|------|--------------------------|
| chr5 | 145113250 | 145113350 | 1090-Lng-A-T | 336  | chr5:145113250-145113350 |
| chr5 | 145640950 | 145641050 | 1065-Lng-A-T | 48   | chr5:145640950-145641050 |
| chr5 | 145653250 | 145653350 | 1167-Lng-A-T | 4925 | chr5:145653250-145653350 |
| chr5 | 145946950 | 145947050 | 1072-Lng-A-T | 52   | chr5:145946950-145947050 |
| chr5 | 146545950 | 146546050 | 1100-Lng-B-T | 64   | chr5:146545950-146546050 |
| chr5 | 146778250 | 146778350 | 846-Lng-A-T  | 134  | chr5:146778250-146778350 |
| chr5 | 146796750 | 146796850 | 1100-Lng-B-T | 51   | chr5:146796750-146796850 |
| chr5 | 147078650 | 147078750 | 1151-Lng-A-T | 55   | chr5:147078650-147078750 |
| chr5 | 147087150 | 147087250 | 1065-Lng-C-T | 696  | chr5:147087150-147087250 |
| chr5 | 147106050 | 147106150 | 1223-Lng-A-T | 119  | chr5:147106050-147106150 |
| chr5 | 147107550 | 147107650 | 1274-Lng-A-T | 56   | chr5:147107550-147107650 |
| chr5 | 147165050 | 147165150 | 1090-Lng-B-T | 173  | chr5:147165050-147165150 |
| chr5 | 147599350 | 147599450 | 1065-Lng-B-T | 61   | chr5:147599350-147599450 |
| chr5 | 147834150 | 147834250 | 1223-Lng-B-T | 118  | chr5:147834150-147834250 |
| chr5 | 148247650 | 148247750 | 1188-Lng-A-T | 94   | chr5:148247650-148247750 |
| chr5 | 148251550 | 148251650 | 1100-Lng-A-T | 110  | chr5:148251550-148251650 |
| chr5 | 148254150 | 148254250 | 1004-Lng-A-T | 126  | chr5:148254150-148254250 |
| chr5 | 148288850 | 148288950 | 1223-Lng-B-T | 179  | chr5:148288850-148288950 |
| chr5 | 148293150 | 148293250 | 1065-Lng-B-T | 113  | chr5:148293150-148293250 |
| chr5 | 148299950 | 148300050 | 1223-Lng-A-T | 93   | chr5:148299950-148300050 |
| chr5 | 148316650 | 148316750 | 1223-Lng-C-T | 60   | chr5:148316650-148316750 |
| chr5 | 148330450 | 148330550 | 846-Lng-A-T  | 59   | chr5:148330450-148330550 |
| chr5 | 148478650 | 148478750 | 1274-Lng-A-T | 57   | chr5:148478650-148478750 |
| chr5 | 148486350 | 148486450 | 1188-Lng-A-T | 37   | chr5:148486350-148486450 |
| chr5 | 148559550 | 148559650 | 1223-Lng-C-T | 44   | chr5:148559550-148559650 |
| chr5 | 149088450 | 149088550 | 1072-Lng-A-T | 78   | chr5:149088450-149088550 |
| chr5 | 149229350 | 149229450 | 1065-Lng-A-T | 674  | chr5:149229350-149229450 |
| chr5 | 149296050 | 149296150 | 1274-Lng-A-T | 84   | chr5:149296050-149296150 |
| chr5 | 149398050 | 149398150 | 1188-Lng-A-T | 95   | chr5:149398050-149398150 |
| chr5 | 149776550 | 149776650 | 1274-Lng-A-T | 311  | chr5:149776550-149776650 |
| chr5 | 149845950 | 149846050 | 1004-Lng-A-T | 126  | chr5:149845950-149846050 |
| chr5 | 150236650 | 150236750 | 1151-Lng-A-T | 54   | chr5:150236650-150236750 |
| chr5 | 150422750 | 150422850 | 1223-Lng-D-T | 44   | chr5:150422750-150422850 |
| chr5 | 150426350 | 150426450 | 1223-Lng-C-T | 63   | chr5:150426350-150426450 |
| chr5 | 150873750 | 150873850 | 1065-Lng-B-T | 322  | chr5:150873750-150873850 |
| chr5 | 151150950 | 151151050 | 1004-Lng-A-T | 55   | chr5:151150950-151151050 |
| chr5 | 151254250 | 151254350 | 1274-Lng-A-T | 74   | chr5:151254250-151254350 |
| chr5 | 151338150 | 151338250 | 901-Lng-D-T  | 54   | chr5:151338150-151338250 |
| chr5 | 151376950 | 151377050 | 1274-Lng-A-T | 79   | chr5:151376950-151377050 |
| chr5 | 151429550 | 151429650 | 1100-Lng-A-T | 60   | chr5:151429550-151429650 |
| chr5 | 151444250 | 151444350 | 1004-Lng-A-T | 741  | chr5:151444250-151444350 |
| chr5 | 151517050 | 151517150 | 1100-Lng-A-T | 123  | chr5:151517050-151517150 |
| chr5 | 151536950 | 151537050 | 1072-Lng-A-T | 70   | chr5:151536950-151537050 |
| chr5 | 151583650 | 151583750 | 1151-Lng-A-T | 120  | chr5:151583650-151583750 |
| chr5 | 151769050 | 151769150 | 1152-Lng-A-T | 61   | chr5:151769050-151769150 |
| chr5 | 151888350 | 151888450 | 1065-Lng-A-T | 66   | chr5:151888350-151888450 |



**Table S2: SB Insertion regions**

|      |           |           |              |     |                          |
|------|-----------|-----------|--------------|-----|--------------------------|
| chr5 | 151913250 | 151913350 | 1223-Lng-D-T | 41  | chr5:151913250-151913350 |
| chr5 | 151937550 | 151937650 | 1151-Lng-A-T | 63  | chr5:151937550-151937650 |
| chr5 | 151938650 | 151938750 | 1188-Lng-A-T | 48  | chr5:151938650-151938750 |
| chr5 | 151962750 | 151962850 | 901-Lng-A-T  | 121 | chr5:151962750-151962850 |
| chr5 | 151971050 | 151971150 | 1167-Lng-A-T | 50  | chr5:151971050-151971150 |
| chr5 | 151975450 | 151975550 | 901-Lng-C-T  | 68  | chr5:151975450-151975550 |
| chr5 | 151987650 | 151987750 | 1152-Lng-A-T | 133 | chr5:151987650-151987750 |
| chr5 | 151990750 | 151990850 | 1100-Lng-A-T | 83  | chr5:151990750-151990850 |
| chr5 | 152345050 | 152345150 | 1065-Lng-B-T | 67  | chr5:152345050-152345150 |
| chr6 | 3322450   | 3322550   | 1223-Lng-D-T | 40  | chr6:3322450-3322550     |
| chr6 | 3336750   | 3336850   | 1100-Lng-A-T | 110 | chr6:3336750-3336850     |
| chr6 | 3371650   | 3371750   | 1065-Lng-B-T | 51  | chr6:3371650-3371750     |
| chr6 | 3451650   | 3451750   | 846-Lng-A-T  | 83  | chr6:3451650-3451750     |
| chr6 | 3461450   | 3461550   | 1072-Lng-A-T | 56  | chr6:3461450-3461550     |
| chr6 | 3469850   | 3469950   | 901-Lng-D-T  | 308 | chr6:3469850-3469950     |
| chr6 | 3512750   | 3512850   | 1065-Lng-B-T | 86  | chr6:3512750-3512850     |
| chr6 | 3541250   | 3541350   | 1072-Lng-A-T | 191 | chr6:3541250-3541350     |
| chr6 | 3642150   | 3642250   | 1072-Lng-A-T | 116 | chr6:3642150-3642250     |
| chr6 | 3885350   | 3885450   | 901-Lng-D-T  | 101 | chr6:3885350-3885450     |
| chr6 | 4017750   | 4017850   | 1152-Lng-A-T | 35  | chr6:4017750-4017850     |
| chr6 | 4025850   | 4025950   | 1004-Lng-A-T | 64  | chr6:4025850-4025950     |
| chr6 | 4152050   | 4152150   | 901-Lng-C-T  | 174 | chr6:4152050-4152150     |
| chr6 | 4250250   | 4250350   | 1152-Lng-A-T | 32  | chr6:4250250-4250350     |
| chr6 | 4569850   | 4569950   | 1223-Lng-D-T | 54  | chr6:4569850-4569950     |
| chr6 | 4883950   | 4884050   | 1065-Lng-A-T | 46  | chr6:4883950-4884050     |
| chr6 | 4910150   | 4910250   | 1223-Lng-C-T | 102 | chr6:4910150-4910250     |
| chr6 | 4919150   | 4919250   | 1065-Lng-C-T | 100 | chr6:4919150-4919250     |
| chr6 | 4945850   | 4945950   | 901-Lng-A-T  | 118 | chr6:4945850-4945950     |
| chr6 | 4954250   | 4954350   | 1151-Lng-A-T | 235 | chr6:4954250-4954350     |
| chr6 | 5012250   | 5012350   | 1274-Lng-A-T | 49  | chr6:5012250-5012350     |
| chr6 | 5013550   | 5013650   | 1223-Lng-D-T | 70  | chr6:5013550-5013650     |
| chr6 | 5045850   | 5045950   | 901-Lng-B-T  | 40  | chr6:5045850-5045950     |
| chr6 | 5082350   | 5082450   | 1274-Lng-A-T | 65  | chr6:5082350-5082450     |
| chr6 | 5204750   | 5204850   | 1223-Lng-D-T | 63  | chr6:5204750-5204850     |
| chr6 | 5276150   | 5276250   | 1072-Lng-A-T | 156 | chr6:5276150-5276250     |
| chr6 | 5543050   | 5543150   | 1065-Lng-C-T | 83  | chr6:5543050-5543150     |
| chr6 | 5869050   | 5869150   | 901-Lng-A-T  | 52  | chr6:5869050-5869150     |
| chr6 | 5936350   | 5936450   | 1065-Lng-C-T | 88  | chr6:5936350-5936450     |
| chr6 | 6349950   | 6350050   | 1004-Lng-A-T | 93  | chr6:6349950-6350050     |
| chr6 | 6509750   | 6509850   | 1152-Lng-A-T | 56  | chr6:6509750-6509850     |
| chr6 | 6512250   | 6512350   | 901-Lng-A-T  | 75  | chr6:6512250-6512350     |
| chr6 | 6512450   | 6512550   | 901-Lng-B-T  | 60  | chr6:6512450-6512550     |
| chr6 | 6512650   | 6512750   | 1188-Lng-A-T | 38  | chr6:6512650-6512750     |
| chr6 | 6512650   | 6512750   | 901-Lng-A-T  | 64  | chr6:6512650-6512750     |
| chr6 | 6581350   | 6581450   | 901-Lng-A-T  | 154 | chr6:6581350-6581450     |
| chr6 | 6621550   | 6621650   | 1152-Lng-A-T | 89  | chr6:6621550-6621650     |

**Table S2: SB Insertion regions**

|      |          |          |              |      |                        |
|------|----------|----------|--------------|------|------------------------|
| chr6 | 6790950  | 6791050  | 901-Lng-A-T  | 529  | chr6:6790950-6791050   |
| chr6 | 7219450  | 7219550  | 1090-Lng-B-T | 362  | chr6:7219450-7219550   |
| chr6 | 7293950  | 7294050  | 1152-Lng-A-T | 71   | chr6:7293950-7294050   |
| chr6 | 7466050  | 7466150  | 901-Lng-B-T  | 146  | chr6:7466050-7466150   |
| chr6 | 7509250  | 7509350  | 846-Lng-A-T  | 1335 | chr6:7509250-7509350   |
| chr6 | 7755650  | 7755750  | 1223-Lng-A-T | 140  | chr6:7755650-7755750   |
| chr6 | 7800650  | 7800750  | 1004-Lng-A-T | 55   | chr6:7800650-7800750   |
| chr6 | 7813050  | 7813150  | 1274-Lng-A-T | 146  | chr6:7813050-7813150   |
| chr6 | 7813450  | 7813550  | 1223-Lng-C-T | 49   | chr6:7813450-7813550   |
| chr6 | 7821150  | 7821250  | 846-Lng-A-T  | 52   | chr6:7821150-7821250   |
| chr6 | 7826250  | 7826350  | 1274-Lng-A-T | 71   | chr6:7826250-7826350   |
| chr6 | 7994150  | 7994250  | 1065-Lng-C-T | 1910 | chr6:7994150-7994250   |
| chr6 | 8055250  | 8055350  | 1167-Lng-A-T | 142  | chr6:8055250-8055350   |
| chr6 | 8071750  | 8071850  | 1274-Lng-A-T | 71   | chr6:8071750-8071850   |
| chr6 | 8081550  | 8081650  | 1090-Lng-A-T | 59   | chr6:8081550-8081650   |
| chr6 | 8176450  | 8176550  | 1065-Lng-C-T | 369  | chr6:8176450-8176550   |
| chr6 | 8245250  | 8245350  | 901-Lng-B-T  | 41   | chr6:8245250-8245350   |
| chr6 | 8270750  | 8270850  | 1274-Lng-A-T | 136  | chr6:8270750-8270850   |
| chr6 | 8348650  | 8348750  | 1065-Lng-A-T | 94   | chr6:8348650-8348750   |
| chr6 | 8412250  | 8412350  | 1004-Lng-A-T | 59   | chr6:8412250-8412350   |
| chr6 | 8499650  | 8499750  | 1167-Lng-A-T | 53   | chr6:8499650-8499750   |
| chr6 | 8535250  | 8535350  | 1151-Lng-A-T | 94   | chr6:8535250-8535350   |
| chr6 | 8538950  | 8539050  | 901-Lng-C-T  | 70   | chr6:8538950-8539050   |
| chr6 | 8602550  | 8602650  | 1100-Lng-A-T | 66   | chr6:8602550-8602650   |
| chr6 | 8866050  | 8866150  | 846-Lng-A-T  | 118  | chr6:8866050-8866150   |
| chr6 | 9053750  | 9053850  | 1065-Lng-B-T | 91   | chr6:9053750-9053850   |
| chr6 | 9064650  | 9064750  | 1223-Lng-A-T | 111  | chr6:9064650-9064750   |
| chr6 | 9080750  | 9080850  | 1004-Lng-A-T | 63   | chr6:9080750-9080850   |
| chr6 | 9403950  | 9404050  | 1090-Lng-B-T | 397  | chr6:9403950-9404050   |
| chr6 | 9615650  | 9615750  | 1090-Lng-A-T | 981  | chr6:9615650-9615750   |
| chr6 | 9876650  | 9876750  | 1004-Lng-A-T | 80   | chr6:9876650-9876750   |
| chr6 | 10068950 | 10069050 | 1274-Lng-A-T | 81   | chr6:10068950-10069050 |
| chr6 | 10365450 | 10365550 | 1065-Lng-B-T | 43   | chr6:10365450-10365550 |
| chr6 | 10444250 | 10444350 | 1274-Lng-A-T | 133  | chr6:10444250-10444350 |
| chr6 | 10680150 | 10680250 | 1151-Lng-A-T | 408  | chr6:10680150-10680250 |
| chr6 | 10854250 | 10854350 | 901-Lng-C-T  | 206  | chr6:10854250-10854350 |
| chr6 | 11032950 | 11033050 | 1223-Lng-D-T | 43   | chr6:11032950-11033050 |
| chr6 | 11053250 | 11053350 | 1223-Lng-D-T | 40   | chr6:11053250-11053350 |
| chr6 | 11110950 | 11111050 | 1167-Lng-A-T | 88   | chr6:11110950-11111050 |
| chr6 | 11153750 | 11153850 | 1188-Lng-A-T | 59   | chr6:11153750-11153850 |
| chr6 | 11219450 | 11219550 | 1090-Lng-B-T | 738  | chr6:11219450-11219550 |
| chr6 | 11261450 | 11261550 | 1274-Lng-A-T | 73   | chr6:11261450-11261550 |
| chr6 | 11675450 | 11675550 | 1090-Lng-A-T | 46   | chr6:11675450-11675550 |
| chr6 | 11856150 | 11856250 | 901-Lng-C-T  | 40   | chr6:11856150-11856250 |
| chr6 | 11949450 | 11949550 | 901-Lng-A-T  | 50   | chr6:11949450-11949550 |
| chr6 | 11969350 | 11969450 | 1167-Lng-A-T | 90   | chr6:11969350-11969450 |

**Table S2: SB Insertion regions**

|      |          |          |              |     |                        |
|------|----------|----------|--------------|-----|------------------------|
| chr6 | 11980850 | 11980950 | 1223-Lng-B-T | 61  | chr6:11980850-11980950 |
| chr6 | 12037150 | 12037250 | 1090-Lng-A-T | 45  | chr6:12037150-12037250 |
| chr6 | 12151850 | 12151950 | 1274-Lng-A-T | 119 | chr6:12151850-12151950 |
| chr6 | 12566150 | 12566250 | 1223-Lng-B-T | 39  | chr6:12566150-12566250 |
| chr6 | 12614150 | 12614250 | 1065-Lng-B-T | 46  | chr6:12614150-12614250 |
| chr6 | 12724950 | 12725050 | 1152-Lng-A-T | 66  | chr6:12724950-12725050 |
| chr6 | 13005050 | 13005150 | 901-Lng-C-T  | 49  | chr6:13005050-13005150 |
| chr6 | 13026750 | 13026850 | 1274-Lng-A-T | 249 | chr6:13026750-13026850 |
| chr6 | 13026750 | 13026850 | 1274-Lng-A-T | 451 | chr6:13026750-13026850 |
| chr6 | 13029550 | 13029650 | 901-Lng-A-T  | 110 | chr6:13029550-13029650 |
| chr6 | 13351250 | 13351350 | 901-Lng-D-T  | 41  | chr6:13351250-13351350 |
| chr6 | 13605150 | 13605250 | 1065-Lng-C-T | 64  | chr6:13605150-13605250 |
| chr6 | 13620850 | 13620950 | 1065-Lng-C-T | 102 | chr6:13620850-13620950 |
| chr6 | 13812150 | 13812250 | 1072-Lng-A-T | 160 | chr6:13812150-13812250 |
| chr6 | 13890750 | 13890850 | 1223-Lng-B-T | 399 | chr6:13890750-13890850 |
| chr6 | 13901250 | 13901350 | 1004-Lng-A-T | 74  | chr6:13901250-13901350 |
| chr6 | 14007750 | 14007850 | 1152-Lng-A-T | 101 | chr6:14007750-14007850 |
| chr6 | 14355350 | 14355450 | 901-Lng-A-T  | 142 | chr6:14355350-14355450 |
| chr6 | 14689350 | 14689450 | 1090-Lng-A-T | 87  | chr6:14689350-14689450 |
| chr6 | 14894450 | 14894550 | 901-Lng-C-T  | 46  | chr6:14894450-14894550 |
| chr6 | 15024450 | 15024550 | 901-Lng-A-T  | 115 | chr6:15024450-15024550 |
| chr6 | 15079150 | 15079250 | 901-Lng-B-T  | 132 | chr6:15079150-15079250 |
| chr6 | 15080950 | 15081050 | 1065-Lng-C-T | 110 | chr6:15080950-15081050 |
| chr6 | 15087150 | 15087250 | 1065-Lng-B-T | 140 | chr6:15087150-15087250 |
| chr6 | 15087250 | 15087350 | 1004-Lng-A-T | 52  | chr6:15087250-15087350 |
| chr6 | 15151550 | 15151650 | 1065-Lng-A-T | 64  | chr6:15151550-15151650 |
| chr6 | 15165250 | 15165350 | 1151-Lng-A-T | 92  | chr6:15165250-15165350 |
| chr6 | 15227250 | 15227350 | 1223-Lng-B-T | 132 | chr6:15227250-15227350 |
| chr6 | 15294350 | 15294450 | 1065-Lng-B-T | 55  | chr6:15294350-15294450 |
| chr6 | 15299350 | 15299450 | 1152-Lng-A-T | 99  | chr6:15299350-15299450 |
| chr6 | 15688550 | 15688650 | 901-Lng-B-T  | 85  | chr6:15688550-15688650 |
| chr6 | 15699450 | 15699550 | 1223-Lng-B-T | 103 | chr6:15699450-15699550 |
| chr6 | 15716650 | 15716750 | 1065-Lng-C-T | 90  | chr6:15716650-15716750 |
| chr6 | 15724950 | 15725050 | 1223-Lng-B-T | 239 | chr6:15724950-15725050 |
| chr6 | 15725050 | 15725150 | 1223-Lng-D-T | 46  | chr6:15725050-15725150 |
| chr6 | 15730450 | 15730550 | 1274-Lng-A-T | 67  | chr6:15730450-15730550 |
| chr6 | 15759550 | 15759650 | 1004-Lng-A-T | 50  | chr6:15759550-15759650 |
| chr6 | 15880150 | 15880250 | 1065-Lng-A-T | 108 | chr6:15880150-15880250 |
| chr6 | 15930650 | 15930750 | 1072-Lng-A-T | 48  | chr6:15930650-15930750 |
| chr6 | 16363850 | 16363950 | 901-Lng-C-T  | 88  | chr6:16363850-16363950 |
| chr6 | 16365850 | 16365950 | 1065-Lng-A-T | 56  | chr6:16365850-16365950 |
| chr6 | 16463650 | 16463750 | 901-Lng-D-T  | 83  | chr6:16463650-16463750 |
| chr6 | 16497450 | 16497550 | 1274-Lng-A-T | 80  | chr6:16497450-16497550 |
| chr6 | 16816050 | 16816150 | 1065-Lng-B-T | 104 | chr6:16816050-16816150 |
| chr6 | 16882250 | 16882350 | 901-Lng-D-T  | 642 | chr6:16882250-16882350 |
| chr6 | 17145550 | 17145650 | 1065-Lng-B-T | 337 | chr6:17145550-17145650 |

**Table S2: SB Insertion regions**

|      |          |          |              |     |                        |
|------|----------|----------|--------------|-----|------------------------|
| chr6 | 17161250 | 17161350 | 1065-Lng-C-T | 141 | chr6:17161250-17161350 |
| chr6 | 17278150 | 17278250 | 901-Lng-D-T  | 80  | chr6:17278150-17278250 |
| chr6 | 17395450 | 17395550 | 1004-Lng-A-T | 68  | chr6:17395450-17395550 |
| chr6 | 17423650 | 17423750 | 1188-Lng-A-T | 67  | chr6:17423650-17423750 |
| chr6 | 17509750 | 17509850 | 846-Lng-A-T  | 52  | chr6:17509750-17509850 |
| chr6 | 17517050 | 17517150 | 1065-Lng-B-T | 55  | chr6:17517050-17517150 |
| chr6 | 17711550 | 17711650 | 1100-Lng-B-T | 72  | chr6:17711550-17711650 |
| chr6 | 17820550 | 17820650 | 901-Lng-B-T  | 61  | chr6:17820550-17820650 |
| chr6 | 18138250 | 18138350 | 846-Lng-A-T  | 81  | chr6:18138250-18138350 |
| chr6 | 18211350 | 18211450 | 1090-Lng-A-T | 74  | chr6:18211350-18211450 |
| chr6 | 18327350 | 18327450 | 1223-Lng-C-T | 66  | chr6:18327350-18327450 |
| chr6 | 18353450 | 18353550 | 1065-Lng-A-T | 59  | chr6:18353450-18353550 |
| chr6 | 18375950 | 18376050 | 901-Lng-B-T  | 36  | chr6:18375950-18376050 |
| chr6 | 18491150 | 18491250 | 1065-Lng-A-T | 58  | chr6:18491150-18491250 |
| chr6 | 18507050 | 18507150 | 846-Lng-A-T  | 71  | chr6:18507050-18507150 |
| chr6 | 18664250 | 18664350 | 901-Lng-A-T  | 116 | chr6:18664250-18664350 |
| chr6 | 18814250 | 18814350 | 1274-Lng-A-T | 79  | chr6:18814250-18814350 |
| chr6 | 18987350 | 18987450 | 1223-Lng-B-T | 35  | chr6:18987350-18987450 |
| chr6 | 19034350 | 19034450 | 901-Lng-A-T  | 101 | chr6:19034350-19034450 |
| chr6 | 19484350 | 19484450 | 901-Lng-C-T  | 56  | chr6:19484350-19484450 |
| chr6 | 19518150 | 19518250 | 901-Lng-D-T  | 304 | chr6:19518150-19518250 |
| chr6 | 19607850 | 19607950 | 1004-Lng-A-T | 62  | chr6:19607850-19607950 |
| chr6 | 19627650 | 19627750 | 901-Lng-A-T  | 54  | chr6:19627650-19627750 |
| chr6 | 19681250 | 19681350 | 846-Lng-A-T  | 57  | chr6:19681250-19681350 |
| chr6 | 19700050 | 19700150 | 901-Lng-D-T  | 404 | chr6:19700050-19700150 |
| chr6 | 19722350 | 19722450 | 901-Lng-C-T  | 92  | chr6:19722350-19722450 |
| chr6 | 19756450 | 19756550 | 1065-Lng-B-T | 130 | chr6:19756450-19756550 |
| chr6 | 19811050 | 19811150 | 1223-Lng-B-T | 43  | chr6:19811050-19811150 |
| chr6 | 19953150 | 19953250 | 1004-Lng-A-T | 77  | chr6:19953150-19953250 |
| chr6 | 20053150 | 20053250 | 901-Lng-B-T  | 108 | chr6:20053150-20053250 |
| chr6 | 20238250 | 20238350 | 1065-Lng-A-T | 64  | chr6:20238250-20238350 |
| chr6 | 20257750 | 20257850 | 901-Lng-A-T  | 136 | chr6:20257750-20257850 |
| chr6 | 20515150 | 20515250 | 1065-Lng-B-T | 52  | chr6:20515150-20515250 |
| chr6 | 20611250 | 20611350 | 1004-Lng-A-T | 79  | chr6:20611250-20611350 |
| chr6 | 20626550 | 20626650 | 1065-Lng-B-T | 53  | chr6:20626550-20626650 |
| chr6 | 20831750 | 20831850 | 901-Lng-D-T  | 134 | chr6:20831750-20831850 |
| chr6 | 20895850 | 20895950 | 1090-Lng-B-T | 444 | chr6:20895850-20895950 |
| chr6 | 20923450 | 20923550 | 901-Lng-B-T  | 249 | chr6:20923450-20923550 |
| chr6 | 21375350 | 21375450 | 1065-Lng-B-T | 229 | chr6:21375350-21375450 |
| chr6 | 21827050 | 21827150 | 901-Lng-B-T  | 122 | chr6:21827050-21827150 |
| chr6 | 21920350 | 21920450 | 1090-Lng-B-T | 135 | chr6:21920350-21920450 |
| chr6 | 22012550 | 22012650 | 1274-Lng-A-T | 49  | chr6:22012550-22012650 |
| chr6 | 22036050 | 22036150 | 901-Lng-A-T  | 106 | chr6:22036050-22036150 |
| chr6 | 22230950 | 22231050 | 1065-Lng-A-T | 78  | chr6:22230950-22231050 |
| chr6 | 22288450 | 22288550 | 901-Lng-C-T  | 104 | chr6:22288450-22288550 |
| chr6 | 22488550 | 22488650 | 1065-Lng-C-T | 67  | chr6:22488550-22488650 |

**Table S2: SB Insertion regions**

|      |          |          |              |     |                        |
|------|----------|----------|--------------|-----|------------------------|
| chr6 | 22603050 | 22603150 | 1223-Lng-A-T | 196 | chr6:22603050-22603150 |
| chr6 | 22678750 | 22678850 | 1274-Lng-A-T | 49  | chr6:22678750-22678850 |
| chr6 | 23229350 | 23229450 | 1004-Lng-A-T | 91  | chr6:23229350-23229450 |
| chr6 | 23388350 | 23388450 | 1072-Lng-A-T | 83  | chr6:23388350-23388450 |
| chr6 | 23486550 | 23486650 | 1065-Lng-A-T | 62  | chr6:23486550-23486650 |
| chr6 | 23501350 | 23501450 | 1004-Lng-A-T | 80  | chr6:23501350-23501450 |
| chr6 | 23531650 | 23531750 | 1065-Lng-B-T | 105 | chr6:23531650-23531750 |
| chr6 | 23602250 | 23602350 | 901-Lng-A-T  | 133 | chr6:23602250-23602350 |
| chr6 | 23648650 | 23648750 | 1072-Lng-A-T | 200 | chr6:23648650-23648750 |
| chr6 | 23694450 | 23694550 | 901-Lng-A-T  | 55  | chr6:23694450-23694550 |
| chr6 | 23788350 | 23788450 | 1274-Lng-A-T | 114 | chr6:23788350-23788450 |
| chr6 | 24082650 | 24082750 | 901-Lng-D-T  | 36  | chr6:24082650-24082750 |
| chr6 | 24164550 | 24164650 | 1167-Lng-A-T | 72  | chr6:24164550-24164650 |
| chr6 | 24205550 | 24205650 | 1090-Lng-A-T | 343 | chr6:24205550-24205650 |
| chr6 | 24259350 | 24259450 | 1065-Lng-B-T | 52  | chr6:24259350-24259450 |
| chr6 | 24423450 | 24423550 | 901-Lng-A-T  | 67  | chr6:24423450-24423550 |
| chr6 | 24518150 | 24518250 | 1072-Lng-A-T | 161 | chr6:24518150-24518250 |
| chr6 | 24563050 | 24563150 | 846-Lng-A-T  | 135 | chr6:24563050-24563150 |
| chr6 | 24564650 | 24564750 | 1151-Lng-A-T | 74  | chr6:24564650-24564750 |
| chr6 | 24597050 | 24597150 | 1090-Lng-A-T | 77  | chr6:24597050-24597150 |
| chr6 | 24597050 | 24597150 | 901-Lng-C-T  | 310 | chr6:24597050-24597150 |
| chr6 | 24604350 | 24604450 | 901-Lng-B-T  | 285 | chr6:24604350-24604450 |
| chr6 | 24637250 | 24637350 | 1223-Lng-D-T | 50  | chr6:24637250-24637350 |
| chr6 | 24723950 | 24724050 | 1065-Lng-B-T | 75  | chr6:24723950-24724050 |
| chr6 | 24792550 | 24792650 | 1152-Lng-A-T | 53  | chr6:24792550-24792650 |
| chr6 | 24804550 | 24804650 | 1100-Lng-B-T | 54  | chr6:24804550-24804650 |
| chr6 | 24821150 | 24821250 | 1152-Lng-A-T | 77  | chr6:24821150-24821250 |
| chr6 | 25150050 | 25150150 | 901-Lng-C-T  | 54  | chr6:25150050-25150150 |
| chr6 | 25189050 | 25189150 | 1004-Lng-A-T | 88  | chr6:25189050-25189150 |
| chr6 | 25395150 | 25395250 | 1152-Lng-A-T | 72  | chr6:25395150-25395250 |
| chr6 | 25398350 | 25398450 | 1065-Lng-C-T | 86  | chr6:25398350-25398450 |
| chr6 | 25560850 | 25560950 | 1152-Lng-A-T | 70  | chr6:25560850-25560950 |
| chr6 | 25604050 | 25604150 | 1223-Lng-B-T | 39  | chr6:25604050-25604150 |
| chr6 | 25718050 | 25718150 | 1004-Lng-A-T | 55  | chr6:25718050-25718150 |
| chr6 | 25768250 | 25768350 | 901-Lng-C-T  | 194 | chr6:25768250-25768350 |
| chr6 | 25827050 | 25827150 | 1152-Lng-A-T | 120 | chr6:25827050-25827150 |
| chr6 | 26122450 | 26122550 | 1065-Lng-B-T | 46  | chr6:26122450-26122550 |
| chr6 | 26195650 | 26195750 | 1065-Lng-C-T | 93  | chr6:26195650-26195750 |
| chr6 | 26433850 | 26433950 | 1004-Lng-A-T | 80  | chr6:26433850-26433950 |
| chr6 | 26616750 | 26616850 | 1274-Lng-A-T | 142 | chr6:26616750-26616850 |
| chr6 | 26740150 | 26740250 | 1072-Lng-A-T | 53  | chr6:26740150-26740250 |
| chr6 | 26905950 | 26906050 | 901-Lng-D-T  | 88  | chr6:26905950-26906050 |
| chr6 | 27109450 | 27109550 | 901-Lng-B-T  | 111 | chr6:27109450-27109550 |
| chr6 | 27207050 | 27207150 | 1090-Lng-B-T | 225 | chr6:27207050-27207150 |
| chr6 | 27277450 | 27277550 | 901-Lng-D-T  | 289 | chr6:27277450-27277550 |
| chr6 | 27431650 | 27431750 | 1065-Lng-B-T | 92  | chr6:27431650-27431750 |

**Table S2: SB Insertion regions**

|      |          |          |              |      |                        |
|------|----------|----------|--------------|------|------------------------|
| chr6 | 27667250 | 27667350 | 901-Lng-B-T  | 42   | chr6:27667250-27667350 |
| chr6 | 27758550 | 27758650 | 846-Lng-A-T  | 124  | chr6:27758550-27758650 |
| chr6 | 27807950 | 27808050 | 901-Lng-D-T  | 169  | chr6:27807950-27808050 |
| chr6 | 28137950 | 28138050 | 1090-Lng-A-T | 58   | chr6:28137950-28138050 |
| chr6 | 28185650 | 28185750 | 1065-Lng-B-T | 96   | chr6:28185650-28185750 |
| chr6 | 28377350 | 28377450 | 901-Lng-A-T  | 195  | chr6:28377350-28377450 |
| chr6 | 28500550 | 28500650 | 1152-Lng-A-T | 330  | chr6:28500550-28500650 |
| chr6 | 28522450 | 28522550 | 1090-Lng-A-T | 80   | chr6:28522450-28522550 |
| chr6 | 28531250 | 28531350 | 1072-Lng-A-T | 81   | chr6:28531250-28531350 |
| chr6 | 28534450 | 28534550 | 1274-Lng-A-T | 50   | chr6:28534450-28534550 |
| chr6 | 28543450 | 28543550 | 1223-Lng-D-T | 46   | chr6:28543450-28543550 |
| chr6 | 28560250 | 28560350 | 1151-Lng-A-T | 63   | chr6:28560250-28560350 |
| chr6 | 28571650 | 28571750 | 1090-Lng-A-T | 86   | chr6:28571650-28571750 |
| chr6 | 28606050 | 28606150 | 1167-Lng-A-T | 93   | chr6:28606050-28606150 |
| chr6 | 28658750 | 28658850 | 1151-Lng-A-T | 86   | chr6:28658750-28658850 |
| chr6 | 28754750 | 28754850 | 1274-Lng-A-T | 119  | chr6:28754750-28754850 |
| chr6 | 28777450 | 28777550 | 1065-Lng-B-T | 96   | chr6:28777450-28777550 |
| chr6 | 28787650 | 28787750 | 1072-Lng-A-T | 164  | chr6:28787650-28787750 |
| chr6 | 29306450 | 29306550 | 1065-Lng-B-T | 75   | chr6:29306450-29306550 |
| chr6 | 29310550 | 29310650 | 1223-Lng-C-T | 48   | chr6:29310550-29310650 |
| chr6 | 29326650 | 29326750 | 1065-Lng-C-T | 1362 | chr6:29326650-29326750 |
| chr6 | 29524250 | 29524350 | 1167-Lng-A-T | 51   | chr6:29524250-29524350 |
| chr6 | 29538250 | 29538350 | 1274-Lng-A-T | 412  | chr6:29538250-29538350 |
| chr6 | 29772050 | 29772150 | 1188-Lng-A-T | 108  | chr6:29772050-29772150 |
| chr6 | 29783850 | 29783950 | 1152-Lng-A-T | 43   | chr6:29783850-29783950 |
| chr6 | 29834850 | 29834950 | 1274-Lng-A-T | 63   | chr6:29834850-29834950 |
| chr6 | 29835550 | 29835650 | 1274-Lng-A-T | 270  | chr6:29835550-29835650 |
| chr6 | 29844450 | 29844550 | 1004-Lng-A-T | 219  | chr6:29844450-29844550 |
| chr6 | 30033150 | 30033250 | 1274-Lng-A-T | 63   | chr6:30033150-30033250 |
| chr6 | 30160850 | 30160950 | 901-Lng-B-T  | 121  | chr6:30160850-30160950 |
| chr6 | 30201350 | 30201450 | 1274-Lng-A-T | 159  | chr6:30201350-30201450 |
| chr6 | 30219150 | 30219250 | 1152-Lng-A-T | 315  | chr6:30219150-30219250 |
| chr6 | 30299150 | 30299250 | 1274-Lng-A-T | 100  | chr6:30299150-30299250 |
| chr6 | 30352450 | 30352550 | 1167-Lng-A-T | 105  | chr6:30352450-30352550 |
| chr6 | 30365050 | 30365150 | 1065-Lng-A-T | 39   | chr6:30365050-30365150 |
| chr6 | 30367350 | 30367450 | 1223-Lng-B-T | 102  | chr6:30367350-30367450 |
| chr6 | 30389250 | 30389350 | 901-Lng-C-T  | 84   | chr6:30389250-30389350 |
| chr6 | 30757150 | 30757250 | 1100-Lng-A-T | 66   | chr6:30757150-30757250 |
| chr6 | 30918050 | 30918150 | 1274-Lng-A-T | 92   | chr6:30918050-30918150 |
| chr6 | 31010250 | 31010350 | 1188-Lng-A-T | 90   | chr6:31010250-31010350 |
| chr6 | 31042850 | 31042950 | 1274-Lng-A-T | 84   | chr6:31042850-31042950 |
| chr6 | 31093650 | 31093750 | 1065-Lng-B-T | 83   | chr6:31093650-31093750 |
| chr6 | 31114650 | 31114750 | 1223-Lng-C-T | 60   | chr6:31114650-31114750 |
| chr6 | 31142350 | 31142450 | 1188-Lng-A-T | 115  | chr6:31142350-31142450 |
| chr6 | 31214150 | 31214250 | 846-Lng-A-T  | 117  | chr6:31214150-31214250 |
| chr6 | 31226150 | 31226250 | 1090-Lng-A-T | 149  | chr6:31226150-31226250 |

**Table S2: SB Insertion regions**

|      |          |          |              |      |                        |
|------|----------|----------|--------------|------|------------------------|
| chr6 | 31313850 | 31313950 | 1100-Lng-A-T | 150  | chr6:31313850-31313950 |
| chr6 | 31375250 | 31375350 | 1065-Lng-B-T | 67   | chr6:31375250-31375350 |
| chr6 | 31391250 | 31391350 | 1004-Lng-A-T | 54   | chr6:31391250-31391350 |
| chr6 | 31393250 | 31393350 | 846-Lng-A-T  | 184  | chr6:31393250-31393350 |
| chr6 | 31429250 | 31429350 | 1223-Lng-B-T | 62   | chr6:31429250-31429350 |
| chr6 | 31704850 | 31704950 | 1065-Lng-B-T | 41   | chr6:31704850-31704950 |
| chr6 | 31811350 | 31811450 | 1100-Lng-A-T | 59   | chr6:31811350-31811450 |
| chr6 | 32178950 | 32179050 | 901-Lng-B-T  | 171  | chr6:32178950-32179050 |
| chr6 | 32208950 | 32209050 | 1274-Lng-A-T | 77   | chr6:32208950-32209050 |
| chr6 | 32227550 | 32227650 | 1167-Lng-A-T | 660  | chr6:32227550-32227650 |
| chr6 | 32289550 | 32289650 | 1223-Lng-B-T | 263  | chr6:32289550-32289650 |
| chr6 | 32324650 | 32324750 | 1100-Lng-A-T | 98   | chr6:32324650-32324750 |
| chr6 | 32334750 | 32334850 | 1152-Lng-A-T | 60   | chr6:32334750-32334850 |
| chr6 | 32337050 | 32337150 | 1090-Lng-A-T | 837  | chr6:32337050-32337150 |
| chr6 | 32350050 | 32350150 | 1151-Lng-A-T | 98   | chr6:32350050-32350150 |
| chr6 | 32404650 | 32404750 | 1151-Lng-A-T | 54   | chr6:32404650-32404750 |
| chr6 | 32409750 | 32409850 | 1065-Lng-C-T | 74   | chr6:32409750-32409850 |
| chr6 | 32434750 | 32434850 | 1004-Lng-A-T | 143  | chr6:32434750-32434850 |
| chr6 | 32436850 | 32436950 | 846-Lng-A-T  | 188  | chr6:32436850-32436950 |
| chr6 | 32489650 | 32489750 | 1274-Lng-A-T | 75   | chr6:32489650-32489750 |
| chr6 | 32795350 | 32795450 | 1188-Lng-A-T | 56   | chr6:32795350-32795450 |
| chr6 | 32802350 | 32802450 | 1274-Lng-A-T | 103  | chr6:32802350-32802450 |
| chr6 | 32848450 | 32848550 | 846-Lng-A-T  | 164  | chr6:32848450-32848550 |
| chr6 | 32908350 | 32908450 | 901-Lng-D-T  | 146  | chr6:32908350-32908450 |
| chr6 | 32915750 | 32915850 | 1090-Lng-B-T | 205  | chr6:32915750-32915850 |
| chr6 | 32985950 | 32986050 | 1223-Lng-C-T | 49   | chr6:32985950-32986050 |
| chr6 | 33223750 | 33223850 | 901-Lng-A-T  | 103  | chr6:33223750-33223850 |
| chr6 | 33235950 | 33236050 | 846-Lng-A-T  | 1441 | chr6:33235950-33236050 |
| chr6 | 33377150 | 33377250 | 1090-Lng-A-T | 77   | chr6:33377150-33377250 |
| chr6 | 33381950 | 33382050 | 1223-Lng-A-T | 2441 | chr6:33381950-33382050 |
| chr6 | 33405250 | 33405350 | 1072-Lng-A-T | 61   | chr6:33405250-33405350 |
| chr6 | 33439250 | 33439350 | 1090-Lng-A-T | 50   | chr6:33439250-33439350 |
| chr6 | 33472750 | 33472850 | 1072-Lng-A-T | 56   | chr6:33472750-33472850 |
| chr6 | 33510950 | 33511050 | 1090-Lng-B-T | 77   | chr6:33510950-33511050 |
| chr6 | 33537550 | 33537650 | 846-Lng-A-T  | 122  | chr6:33537550-33537650 |
| chr6 | 33571650 | 33571750 | 1072-Lng-A-T | 57   | chr6:33571650-33571750 |
| chr6 | 33572250 | 33572350 | 1004-Lng-A-T | 229  | chr6:33572250-33572350 |
| chr6 | 33590950 | 33591050 | 1223-Lng-C-T | 45   | chr6:33590950-33591050 |
| chr6 | 33655850 | 33655950 | 1065-Lng-A-T | 41   | chr6:33655850-33655950 |
| chr6 | 33656450 | 33656550 | 1151-Lng-A-T | 117  | chr6:33656450-33656550 |
| chr6 | 33700150 | 33700250 | 901-Lng-B-T  | 129  | chr6:33700150-33700250 |
| chr6 | 33837350 | 33837450 | 1151-Lng-A-T | 206  | chr6:33837350-33837450 |
| chr6 | 33895550 | 33895650 | 901-Lng-B-T  | 47   | chr6:33895550-33895650 |
| chr6 | 34198350 | 34198450 | 1274-Lng-A-T | 64   | chr6:34198350-34198450 |
| chr6 | 34242950 | 34243050 | 1072-Lng-A-T | 823  | chr6:34242950-34243050 |
| chr6 | 34282250 | 34282350 | 1065-Lng-C-T | 94   | chr6:34282250-34282350 |

**Table S2: SB Insertion regions**

|      |          |          |              |      |                        |
|------|----------|----------|--------------|------|------------------------|
| chr6 | 34448350 | 34448450 | 1065-Lng-A-T | 48   | chr6:34448350-34448450 |
| chr6 | 34492550 | 34492650 | 901-Lng-D-T  | 112  | chr6:34492550-34492650 |
| chr6 | 34510050 | 34510150 | 1100-Lng-A-T | 59   | chr6:34510050-34510150 |
| chr6 | 34553650 | 34553750 | 901-Lng-B-T  | 96   | chr6:34553650-34553750 |
| chr6 | 34654750 | 34654850 | 1065-Lng-B-T | 105  | chr6:34654750-34654850 |
| chr6 | 34759150 | 34759250 | 1065-Lng-A-T | 47   | chr6:34759150-34759250 |
| chr6 | 34897250 | 34897350 | 1223-Lng-B-T | 476  | chr6:34897250-34897350 |
| chr6 | 34958750 | 34958850 | 1065-Lng-B-T | 68   | chr6:34958750-34958850 |
| chr6 | 34968650 | 34968750 | 1223-Lng-C-T | 47   | chr6:34968650-34968750 |
| chr6 | 34970950 | 34971050 | 1223-Lng-B-T | 369  | chr6:34970950-34971050 |
| chr6 | 34978450 | 34978550 | 1004-Lng-A-T | 79   | chr6:34978450-34978550 |
| chr6 | 34988350 | 34988450 | 1274-Lng-A-T | 82   | chr6:34988350-34988450 |
| chr6 | 34998550 | 34998650 | 1065-Lng-C-T | 1889 | chr6:34998550-34998650 |
| chr6 | 35022150 | 35022250 | 1274-Lng-A-T | 77   | chr6:35022150-35022250 |
| chr6 | 35026250 | 35026350 | 1223-Lng-D-T | 53   | chr6:35026250-35026350 |
| chr6 | 35036150 | 35036250 | 1274-Lng-A-T | 73   | chr6:35036150-35036250 |
| chr6 | 35058750 | 35058850 | 1167-Lng-A-T | 46   | chr6:35058750-35058850 |
| chr6 | 35154950 | 35155050 | 1072-Lng-A-T | 55   | chr6:35154950-35155050 |
| chr6 | 35157450 | 35157550 | 1004-Lng-A-T | 81   | chr6:35157450-35157550 |
| chr6 | 35244350 | 35244450 | 1072-Lng-A-T | 157  | chr6:35244350-35244450 |
| chr6 | 35452650 | 35452750 | 1151-Lng-A-T | 275  | chr6:35452650-35452750 |
| chr6 | 35491050 | 35491150 | 1223-Lng-D-T | 55   | chr6:35491050-35491150 |
| chr6 | 36251050 | 36251150 | 1065-Lng-A-T | 99   | chr6:36251050-36251150 |
| chr6 | 36376050 | 36376150 | 1065-Lng-C-T | 92   | chr6:36376050-36376150 |
| chr6 | 36846850 | 36846950 | 1223-Lng-B-T | 41   | chr6:36846850-36846950 |
| chr6 | 36968150 | 36968250 | 1065-Lng-B-T | 84   | chr6:36968150-36968250 |
| chr6 | 37280050 | 37280150 | 1152-Lng-A-T | 59   | chr6:37280050-37280150 |
| chr6 | 37358450 | 37358550 | 901-Lng-D-T  | 99   | chr6:37358450-37358550 |
| chr6 | 37364550 | 37364650 | 1090-Lng-A-T | 49   | chr6:37364550-37364650 |
| chr6 | 37387750 | 37387850 | 1151-Lng-A-T | 70   | chr6:37387750-37387850 |
| chr6 | 37478250 | 37478350 | 1004-Lng-A-T | 59   | chr6:37478250-37478350 |
| chr6 | 37700350 | 37700450 | 1065-Lng-A-T | 95   | chr6:37700350-37700450 |
| chr6 | 37838350 | 37838450 | 901-Lng-C-T  | 94   | chr6:37838350-37838450 |
| chr6 | 37883450 | 37883550 | 901-Lng-C-T  | 72   | chr6:37883450-37883550 |
| chr6 | 38348150 | 38348250 | 1167-Lng-A-T | 65   | chr6:38348150-38348250 |
| chr6 | 38390250 | 38390350 | 1065-Lng-B-T | 44   | chr6:38390250-38390350 |
| chr6 | 38415650 | 38415750 | 1223-Lng-C-T | 210  | chr6:38415650-38415750 |
| chr6 | 38420750 | 38420850 | 901-Lng-A-T  | 618  | chr6:38420750-38420850 |
| chr6 | 38504650 | 38504750 | 1090-Lng-A-T | 60   | chr6:38504650-38504750 |
| chr6 | 38516550 | 38516650 | 1167-Lng-A-T | 133  | chr6:38516550-38516650 |
| chr6 | 38519050 | 38519150 | 1151-Lng-A-T | 579  | chr6:38519050-38519150 |
| chr6 | 38533050 | 38533150 | 1274-Lng-A-T | 292  | chr6:38533050-38533150 |
| chr6 | 38563850 | 38563950 | 901-Lng-A-T  | 63   | chr6:38563850-38563950 |
| chr6 | 38581850 | 38581950 | 1090-Lng-A-T | 95   | chr6:38581850-38581950 |
| chr6 | 38616650 | 38616750 | 1072-Lng-A-T | 63   | chr6:38616650-38616750 |
| chr6 | 38638750 | 38638850 | 1167-Lng-A-T | 134  | chr6:38638750-38638850 |



**Table S2: SB Insertion regions**

|      |          |          |              |      |                        |
|------|----------|----------|--------------|------|------------------------|
| chr6 | 38669350 | 38669450 | 1152-Lng-A-T | 317  | chr6:38669350-38669450 |
| chr6 | 38681450 | 38681550 | 1167-Lng-A-T | 469  | chr6:38681450-38681550 |
| chr6 | 38769550 | 38769650 | 1152-Lng-A-T | 271  | chr6:38769550-38769650 |
| chr6 | 38773650 | 38773750 | 1004-Lng-A-T | 111  | chr6:38773650-38773750 |
| chr6 | 38814450 | 38814550 | 901-Lng-C-T  | 107  | chr6:38814450-38814550 |
| chr6 | 38829250 | 38829350 | 1167-Lng-A-T | 6273 | chr6:38829250-38829350 |
| chr6 | 38829550 | 38829650 | 1167-Lng-A-T | 96   | chr6:38829550-38829650 |
| chr6 | 38943350 | 38943450 | 1072-Lng-A-T | 66   | chr6:38943350-38943450 |
| chr6 | 38950650 | 38950750 | 901-Lng-C-T  | 40   | chr6:38950650-38950750 |
| chr6 | 39008650 | 39008750 | 1065-Lng-B-T | 73   | chr6:39008650-39008750 |
| chr6 | 39107450 | 39107550 | 1152-Lng-A-T | 37   | chr6:39107450-39107550 |
| chr6 | 39119150 | 39119250 | 1223-Lng-C-T | 52   | chr6:39119150-39119250 |
| chr6 | 39122850 | 39122950 | 1167-Lng-A-T | 291  | chr6:39122850-39122950 |
| chr6 | 39123650 | 39123750 | 901-Lng-D-T  | 162  | chr6:39123650-39123750 |
| chr6 | 39124350 | 39124450 | 1065-Lng-A-T | 49   | chr6:39124350-39124450 |
| chr6 | 39128950 | 39129050 | 1167-Lng-A-T | 223  | chr6:39128950-39129050 |
| chr6 | 39252450 | 39252550 | 1100-Lng-A-T | 134  | chr6:39252450-39252550 |
| chr6 | 39496850 | 39496950 | 1223-Lng-C-T | 48   | chr6:39496850-39496950 |
| chr6 | 39547050 | 39547150 | 1223-Lng-D-T | 55   | chr6:39547050-39547150 |
| chr6 | 39557050 | 39557150 | 1223-Lng-C-T | 46   | chr6:39557050-39557150 |
| chr6 | 39562350 | 39562450 | 1004-Lng-A-T | 68   | chr6:39562350-39562450 |
| chr6 | 39584650 | 39584750 | 1065-Lng-A-T | 103  | chr6:39584650-39584750 |
| chr6 | 39642950 | 39643050 | 1065-Lng-B-T | 84   | chr6:39642950-39643050 |
| chr6 | 39661350 | 39661450 | 1004-Lng-A-T | 107  | chr6:39661350-39661450 |
| chr6 | 39667850 | 39667950 | 901-Lng-B-T  | 209  | chr6:39667850-39667950 |
| chr6 | 39670550 | 39670650 | 1274-Lng-A-T | 149  | chr6:39670550-39670650 |
| chr6 | 39675850 | 39675950 | 1274-Lng-A-T | 89   | chr6:39675850-39675950 |
| chr6 | 39948250 | 39948350 | 1223-Lng-C-T | 53   | chr6:39948250-39948350 |
| chr6 | 40308350 | 40308450 | 1274-Lng-A-T | 135  | chr6:40308350-40308450 |
| chr6 | 40351950 | 40352050 | 1188-Lng-A-T | 41   | chr6:40351950-40352050 |
| chr6 | 40376150 | 40376250 | 1065-Lng-B-T | 59   | chr6:40376150-40376250 |
| chr6 | 40429950 | 40430050 | 1004-Lng-A-T | 51   | chr6:40429950-40430050 |
| chr6 | 40816550 | 40816650 | 1072-Lng-A-T | 117  | chr6:40816550-40816650 |
| chr6 | 41263050 | 41263150 | 901-Lng-D-T  | 316  | chr6:41263050-41263150 |
| chr6 | 41573250 | 41573350 | 1065-Lng-C-T | 171  | chr6:41573250-41573350 |
| chr6 | 41873450 | 41873550 | 1151-Lng-A-T | 65   | chr6:41873450-41873550 |
| chr6 | 42130250 | 42130350 | 1065-Lng-C-T | 69   | chr6:42130250-42130350 |
| chr6 | 42132650 | 42132750 | 901-Lng-B-T  | 89   | chr6:42132650-42132750 |
| chr6 | 42200050 | 42200150 | 1223-Lng-B-T | 187  | chr6:42200050-42200150 |
| chr6 | 42473750 | 42473850 | 1223-Lng-B-T | 175  | chr6:42473750-42473850 |
| chr6 | 42473850 | 42473950 | 901-Lng-B-T  | 93   | chr6:42473850-42473950 |
| chr6 | 42550950 | 42551050 | 846-Lng-A-T  | 145  | chr6:42550950-42551050 |
| chr6 | 42691550 | 42691650 | 1065-Lng-A-T | 97   | chr6:42691550-42691650 |
| chr6 | 42741850 | 42741950 | 1152-Lng-A-T | 77   | chr6:42741850-42741950 |
| chr6 | 42762150 | 42762250 | 901-Lng-A-T  | 57   | chr6:42762150-42762250 |
| chr6 | 42788750 | 42788850 | 901-Lng-B-T  | 119  | chr6:42788750-42788850 |

**Table S2: SB Insertion regions**

|      |          |          |              |     |                        |
|------|----------|----------|--------------|-----|------------------------|
| chr6 | 43138750 | 43138850 | 1223-Lng-B-T | 87  | chr6:43138750-43138850 |
| chr6 | 43149150 | 43149250 | 1065-Lng-B-T | 99  | chr6:43149150-43149250 |
| chr6 | 43218550 | 43218650 | 901-Lng-B-T  | 197 | chr6:43218550-43218650 |
| chr6 | 43405650 | 43405750 | 1223-Lng-A-T | 116 | chr6:43405650-43405750 |
| chr6 | 43544050 | 43544150 | 1100-Lng-A-T | 59  | chr6:43544050-43544150 |
| chr6 | 44066450 | 44066550 | 901-Lng-B-T  | 108 | chr6:44066450-44066550 |
| chr6 | 44095150 | 44095250 | 1152-Lng-A-T | 97  | chr6:44095150-44095250 |
| chr6 | 44248850 | 44248950 | 901-Lng-D-T  | 369 | chr6:44248850-44248950 |
| chr6 | 44259450 | 44259550 | 1065-Lng-B-T | 46  | chr6:44259450-44259550 |
| chr6 | 44291850 | 44291950 | 1274-Lng-A-T | 194 | chr6:44291850-44291950 |
| chr6 | 44361550 | 44361650 | 1152-Lng-A-T | 80  | chr6:44361550-44361650 |
| chr6 | 44395850 | 44395950 | 846-Lng-A-T  | 123 | chr6:44395850-44395950 |
| chr6 | 44419450 | 44419550 | 1072-Lng-A-T | 49  | chr6:44419450-44419550 |
| chr6 | 44432550 | 44432650 | 1152-Lng-A-T | 162 | chr6:44432550-44432650 |
| chr6 | 44444650 | 44444750 | 1004-Lng-A-T | 65  | chr6:44444650-44444750 |
| chr6 | 44513350 | 44513450 | 1152-Lng-A-T | 248 | chr6:44513350-44513450 |
| chr6 | 44575750 | 44575850 | 1065-Lng-C-T | 76  | chr6:44575750-44575850 |
| chr6 | 44654850 | 44654950 | 1065-Lng-B-T | 78  | chr6:44654850-44654950 |
| chr6 | 44690250 | 44690350 | 1223-Lng-B-T | 55  | chr6:44690250-44690350 |
| chr6 | 44784450 | 44784550 | 901-Lng-A-T  | 53  | chr6:44784450-44784550 |
| chr6 | 44822450 | 44822550 | 1072-Lng-A-T | 62  | chr6:44822450-44822550 |
| chr6 | 44842250 | 44842350 | 1065-Lng-A-T | 39  | chr6:44842250-44842350 |
| chr6 | 45020150 | 45020250 | 1065-Lng-A-T | 61  | chr6:45020150-45020250 |
| chr6 | 45296050 | 45296150 | 901-Lng-C-T  | 85  | chr6:45296050-45296150 |
| chr6 | 45381050 | 45381150 | 1065-Lng-A-T | 48  | chr6:45381050-45381150 |
| chr6 | 45464950 | 45465050 | 1152-Lng-A-T | 53  | chr6:45464950-45465050 |
| chr6 | 45515550 | 45515650 | 1065-Lng-C-T | 86  | chr6:45515550-45515650 |
| chr6 | 45660350 | 45660450 | 1100-Lng-A-T | 54  | chr6:45660350-45660450 |
| chr6 | 46059650 | 46059750 | 1188-Lng-A-T | 138 | chr6:46059650-46059750 |
| chr6 | 46098450 | 46098550 | 901-Lng-C-T  | 34  | chr6:46098450-46098550 |
| chr6 | 46369850 | 46369950 | 901-Lng-A-T  | 80  | chr6:46369850-46369950 |
| chr6 | 46413350 | 46413450 | 1065-Lng-B-T | 41  | chr6:46413350-46413450 |
| chr6 | 46441050 | 46441150 | 901-Lng-A-T  | 68  | chr6:46441050-46441150 |
| chr6 | 46507650 | 46507750 | 1065-Lng-C-T | 91  | chr6:46507650-46507750 |
| chr6 | 46554150 | 46554250 | 1223-Lng-B-T | 120 | chr6:46554150-46554250 |
| chr6 | 46796150 | 46796250 | 1152-Lng-A-T | 75  | chr6:46796150-46796250 |
| chr6 | 46918450 | 46918550 | 1065-Lng-B-T | 125 | chr6:46918450-46918550 |
| chr6 | 46920850 | 46920950 | 1065-Lng-A-T | 55  | chr6:46920850-46920950 |
| chr6 | 46962550 | 46962650 | 1188-Lng-A-T | 102 | chr6:46962550-46962650 |
| chr6 | 47053150 | 47053250 | 1151-Lng-A-T | 132 | chr6:47053150-47053250 |
| chr6 | 47332750 | 47332850 | 1152-Lng-A-T | 145 | chr6:47332750-47332850 |
| chr6 | 47408650 | 47408750 | 1152-Lng-A-T | 85  | chr6:47408650-47408750 |
| chr6 | 47408950 | 47409050 | 1223-Lng-A-T | 137 | chr6:47408950-47409050 |
| chr6 | 47439150 | 47439250 | 1152-Lng-A-T | 219 | chr6:47439150-47439250 |
| chr6 | 47474150 | 47474250 | 1151-Lng-A-T | 73  | chr6:47474150-47474250 |
| chr6 | 47505450 | 47505550 | 1090-Lng-A-T | 46  | chr6:47505450-47505550 |

**Table S2: SB Insertion regions**

|      |          |          |              |     |                        |
|------|----------|----------|--------------|-----|------------------------|
| chr6 | 47525450 | 47525550 | 901-Lng-B-T  | 160 | chr6:47525450-47525550 |
| chr6 | 47593250 | 47593350 | 1223-Lng-C-T | 53  | chr6:47593250-47593350 |
| chr6 | 47790750 | 47790850 | 1090-Lng-A-T | 67  | chr6:47790750-47790850 |
| chr6 | 47805650 | 47805750 | 846-Lng-A-T  | 51  | chr6:47805650-47805750 |
| chr6 | 48034450 | 48034550 | 1223-Lng-D-T | 216 | chr6:48034450-48034550 |
| chr6 | 48604850 | 48604950 | 1090-Lng-A-T | 44  | chr6:48604850-48604950 |
| chr6 | 48779850 | 48779950 | 1090-Lng-A-T | 60  | chr6:48779850-48779950 |
| chr6 | 48906150 | 48906250 | 1152-Lng-A-T | 38  | chr6:48906150-48906250 |
| chr6 | 49043350 | 49043450 | 1274-Lng-A-T | 76  | chr6:49043350-49043450 |
| chr6 | 49058250 | 49058350 | 1188-Lng-A-T | 121 | chr6:49058250-49058350 |
| chr6 | 49192850 | 49192950 | 1151-Lng-A-T | 163 | chr6:49192850-49192950 |
| chr6 | 49193150 | 49193250 | 1100-Lng-A-T | 217 | chr6:49193150-49193250 |
| chr6 | 49195250 | 49195350 | 1152-Lng-A-T | 41  | chr6:49195250-49195350 |
| chr6 | 49200450 | 49200550 | 1004-Lng-A-T | 534 | chr6:49200450-49200550 |
| chr6 | 49357250 | 49357350 | 1004-Lng-A-T | 68  | chr6:49357250-49357350 |
| chr6 | 49995450 | 49995550 | 901-Lng-C-T  | 169 | chr6:49995450-49995550 |
| chr6 | 50019250 | 50019350 | 1004-Lng-A-T | 61  | chr6:50019250-50019350 |
| chr6 | 50092450 | 50092550 | 846-Lng-A-T  | 83  | chr6:50092450-50092550 |
| chr6 | 50137150 | 50137250 | 1072-Lng-A-T | 216 | chr6:50137150-50137250 |
| chr6 | 50143750 | 50143850 | 1274-Lng-A-T | 119 | chr6:50143750-50143850 |
| chr6 | 50321150 | 50321250 | 1004-Lng-A-T | 693 | chr6:50321150-50321250 |
| chr6 | 50344950 | 50345050 | 1223-Lng-B-T | 63  | chr6:50344950-50345050 |
| chr6 | 50417150 | 50417250 | 1188-Lng-A-T | 36  | chr6:50417150-50417250 |
| chr6 | 50529650 | 50529750 | 1100-Lng-A-T | 95  | chr6:50529650-50529750 |
| chr6 | 50741050 | 50741150 | 1065-Lng-C-T | 124 | chr6:50741050-50741150 |
| chr6 | 51195050 | 51195150 | 846-Lng-A-T  | 165 | chr6:51195050-51195150 |
| chr6 | 51422750 | 51422850 | 1100-Lng-A-T | 69  | chr6:51422750-51422850 |
| chr6 | 51466450 | 51466550 | 1004-Lng-A-T | 110 | chr6:51466450-51466550 |
| chr6 | 51504750 | 51504850 | 1223-Lng-A-T | 108 | chr6:51504750-51504850 |
| chr6 | 51855850 | 51855950 | 1274-Lng-A-T | 192 | chr6:51855850-51855950 |
| chr6 | 51873450 | 51873550 | 1274-Lng-A-T | 52  | chr6:51873450-51873550 |
| chr6 | 51886050 | 51886150 | 1223-Lng-B-T | 40  | chr6:51886050-51886150 |
| chr6 | 51937150 | 51937250 | 1223-Lng-B-T | 38  | chr6:51937150-51937250 |
| chr6 | 51961550 | 51961650 | 1151-Lng-A-T | 108 | chr6:51961550-51961650 |
| chr6 | 51969850 | 51969950 | 901-Lng-A-T  | 123 | chr6:51969850-51969950 |
| chr6 | 52450850 | 52450950 | 1065-Lng-B-T | 120 | chr6:52450850-52450950 |
| chr6 | 52497650 | 52497750 | 1004-Lng-A-T | 111 | chr6:52497650-52497750 |
| chr6 | 52501350 | 52501450 | 1151-Lng-A-T | 57  | chr6:52501350-52501450 |
| chr6 | 52507250 | 52507350 | 901-Lng-C-T  | 120 | chr6:52507250-52507350 |
| chr6 | 52514750 | 52514850 | 901-Lng-D-T  | 379 | chr6:52514750-52514850 |
| chr6 | 52523750 | 52523850 | 1274-Lng-A-T | 167 | chr6:52523750-52523850 |
| chr6 | 52690850 | 52690950 | 1223-Lng-D-T | 45  | chr6:52690850-52690950 |
| chr6 | 52755750 | 52755850 | 1274-Lng-A-T | 52  | chr6:52755750-52755850 |
| chr6 | 52903950 | 52904050 | 846-Lng-A-T  | 107 | chr6:52903950-52904050 |
| chr6 | 53019750 | 53019850 | 1072-Lng-A-T | 231 | chr6:53019750-53019850 |
| chr6 | 53325150 | 53325250 | 1004-Lng-A-T | 106 | chr6:53325150-53325250 |

**Table S2: SB Insertion regions**

|      |          |          |              |      |                        |
|------|----------|----------|--------------|------|------------------------|
| chr6 | 53504250 | 53504350 | 1223-Lng-C-T | 49   | chr6:53504250-53504350 |
| chr6 | 53782450 | 53782550 | 1065-Lng-B-T | 55   | chr6:53782450-53782550 |
| chr6 | 53861050 | 53861150 | 901-Lng-C-T  | 33   | chr6:53861050-53861150 |
| chr6 | 53915650 | 53915750 | 1090-Lng-B-T | 258  | chr6:53915650-53915750 |
| chr6 | 54137350 | 54137450 | 1065-Lng-A-T | 73   | chr6:54137350-54137450 |
| chr6 | 54155150 | 54155250 | 1152-Lng-A-T | 32   | chr6:54155150-54155250 |
| chr6 | 54159650 | 54159750 | 1167-Lng-A-T | 45   | chr6:54159650-54159750 |
| chr6 | 54255750 | 54255850 | 1072-Lng-A-T | 99   | chr6:54255750-54255850 |
| chr6 | 54283850 | 54283950 | 1274-Lng-A-T | 131  | chr6:54283850-54283950 |
| chr6 | 54339950 | 54340050 | 1167-Lng-A-T | 57   | chr6:54339950-54340050 |
| chr6 | 54385250 | 54385350 | 1274-Lng-A-T | 160  | chr6:54385250-54385350 |
| chr6 | 54399350 | 54399450 | 1065-Lng-B-T | 113  | chr6:54399350-54399450 |
| chr6 | 54421050 | 54421150 | 901-Lng-A-T  | 747  | chr6:54421050-54421150 |
| chr6 | 54421750 | 54421850 | 1274-Lng-A-T | 83   | chr6:54421750-54421850 |
| chr6 | 54522150 | 54522250 | 1223-Lng-B-T | 44   | chr6:54522150-54522250 |
| chr6 | 54745750 | 54745850 | 1100-Lng-A-T | 65   | chr6:54745750-54745850 |
| chr6 | 54761050 | 54761150 | 1065-Lng-C-T | 90   | chr6:54761050-54761150 |
| chr6 | 54795850 | 54795950 | 1072-Lng-A-T | 109  | chr6:54795850-54795950 |
| chr6 | 54808150 | 54808250 | 901-Lng-C-T  | 57   | chr6:54808150-54808250 |
| chr6 | 54812750 | 54812850 | 1090-Lng-A-T | 51   | chr6:54812750-54812850 |
| chr6 | 54919150 | 54919250 | 1072-Lng-A-T | 156  | chr6:54919150-54919250 |
| chr6 | 55198350 | 55198450 | 1223-Lng-C-T | 69   | chr6:55198350-55198450 |
| chr6 | 55562350 | 55562450 | 901-Lng-A-T  | 133  | chr6:55562350-55562450 |
| chr6 | 55716050 | 55716150 | 901-Lng-B-T  | 102  | chr6:55716050-55716150 |
| chr6 | 55839750 | 55839850 | 1065-Lng-A-T | 77   | chr6:55839750-55839850 |
| chr6 | 55920350 | 55920450 | 1072-Lng-A-T | 78   | chr6:55920350-55920450 |
| chr6 | 56232150 | 56232250 | 846-Lng-A-T  | 79   | chr6:56232150-56232250 |
| chr6 | 56293750 | 56293850 | 901-Lng-C-T  | 35   | chr6:56293750-56293850 |
| chr6 | 56453050 | 56453150 | 1090-Lng-A-T | 271  | chr6:56453050-56453150 |
| chr6 | 56676950 | 56677050 | 901-Lng-C-T  | 61   | chr6:56676950-56677050 |
| chr6 | 56692550 | 56692650 | 1065-Lng-A-T | 71   | chr6:56692550-56692650 |
| chr6 | 56716950 | 56717050 | 901-Lng-C-T  | 2107 | chr6:56716950-56717050 |
| chr6 | 56727050 | 56727150 | 1151-Lng-A-T | 78   | chr6:56727050-56727150 |
| chr6 | 56897050 | 56897150 | 1100-Lng-B-T | 51   | chr6:56897050-56897150 |
| chr6 | 57451750 | 57451850 | 1188-Lng-A-T | 40   | chr6:57451750-57451850 |
| chr6 | 57466350 | 57466450 | 901-Lng-C-T  | 32   | chr6:57466350-57466450 |
| chr6 | 57717350 | 57717450 | 1274-Lng-A-T | 120  | chr6:57717350-57717450 |
| chr6 | 57956950 | 57957050 | 1065-Lng-B-T | 51   | chr6:57956950-57957050 |
| chr6 | 58161250 | 58161350 | 1151-Lng-A-T | 81   | chr6:58161250-58161350 |
| chr6 | 58195650 | 58195750 | 901-Lng-B-T  | 109  | chr6:58195650-58195750 |
| chr6 | 58390150 | 58390250 | 901-Lng-C-T  | 233  | chr6:58390150-58390250 |
| chr6 | 58407050 | 58407150 | 901-Lng-D-T  | 327  | chr6:58407050-58407150 |
| chr6 | 58596250 | 58596350 | 1151-Lng-A-T | 72   | chr6:58596250-58596350 |
| chr6 | 58628350 | 58628450 | 1152-Lng-A-T | 84   | chr6:58628350-58628450 |
| chr6 | 58775850 | 58775950 | 1072-Lng-A-T | 160  | chr6:58775850-58775950 |
| chr6 | 58786350 | 58786450 | 1274-Lng-A-T | 299  | chr6:58786350-58786450 |

**Table S2: SB Insertion regions**

|      |          |          |              |     |                        |
|------|----------|----------|--------------|-----|------------------------|
| chr6 | 58800850 | 58800950 | 1065-Lng-A-T | 55  | chr6:58800850-58800950 |
| chr6 | 58814950 | 58815050 | 1065-Lng-B-T | 46  | chr6:58814950-58815050 |
| chr6 | 58954250 | 58954350 | 1072-Lng-A-T | 54  | chr6:58954250-58954350 |
| chr6 | 58960550 | 58960650 | 901-Lng-B-T  | 73  | chr6:58960550-58960650 |
| chr6 | 59162350 | 59162450 | 1188-Lng-A-T | 36  | chr6:59162350-59162450 |
| chr6 | 59166250 | 59166350 | 846-Lng-A-T  | 100 | chr6:59166250-59166350 |
| chr6 | 59173650 | 59173750 | 1072-Lng-A-T | 205 | chr6:59173650-59173750 |
| chr6 | 59197050 | 59197150 | 1100-Lng-A-T | 111 | chr6:59197050-59197150 |
| chr6 | 59201550 | 59201650 | 1188-Lng-A-T | 279 | chr6:59201550-59201650 |
| chr6 | 59204350 | 59204450 | 1065-Lng-C-T | 77  | chr6:59204350-59204450 |
| chr6 | 59339750 | 59339850 | 1274-Lng-A-T | 68  | chr6:59339750-59339850 |
| chr6 | 59444450 | 59444550 | 1065-Lng-A-T | 136 | chr6:59444450-59444550 |
| chr6 | 59479750 | 59479850 | 1090-Lng-A-T | 66  | chr6:59479750-59479850 |
| chr6 | 59868150 | 59868250 | 1065-Lng-C-T | 936 | chr6:59868150-59868250 |
| chr6 | 59970850 | 59970950 | 1072-Lng-A-T | 77  | chr6:59970850-59970950 |
| chr6 | 60077150 | 60077250 | 1072-Lng-A-T | 234 | chr6:60077150-60077250 |
| chr6 | 60082950 | 60083050 | 1065-Lng-A-T | 76  | chr6:60082950-60083050 |
| chr6 | 60090150 | 60090250 | 1090-Lng-B-T | 83  | chr6:60090150-60090250 |
| chr6 | 60283250 | 60283350 | 1100-Lng-A-T | 74  | chr6:60283250-60283350 |
| chr6 | 60516750 | 60516850 | 1223-Lng-D-T | 42  | chr6:60516750-60516850 |
| chr6 | 60794950 | 60795050 | 1223-Lng-B-T | 278 | chr6:60794950-60795050 |
| chr6 | 61068350 | 61068450 | 901-Lng-B-T  | 43  | chr6:61068350-61068450 |
| chr6 | 61071250 | 61071350 | 846-Lng-A-T  | 111 | chr6:61071250-61071350 |
| chr6 | 61160450 | 61160550 | 901-Lng-D-T  | 37  | chr6:61160450-61160550 |
| chr6 | 61164850 | 61164950 | 1090-Lng-A-T | 84  | chr6:61164850-61164950 |
| chr6 | 61196550 | 61196650 | 1274-Lng-A-T | 86  | chr6:61196550-61196650 |
| chr6 | 61347050 | 61347150 | 1223-Lng-C-T | 52  | chr6:61347050-61347150 |
| chr6 | 61455050 | 61455150 | 901-Lng-B-T  | 66  | chr6:61455050-61455150 |
| chr6 | 61475350 | 61475450 | 1223-Lng-C-T | 43  | chr6:61475350-61475450 |
| chr6 | 61476150 | 61476250 | 1065-Lng-B-T | 230 | chr6:61476150-61476250 |
| chr6 | 61476650 | 61476750 | 1072-Lng-A-T | 97  | chr6:61476650-61476750 |
| chr6 | 61487450 | 61487550 | 901-Lng-B-T  | 615 | chr6:61487450-61487550 |
| chr6 | 61490850 | 61490950 | 1223-Lng-C-T | 53  | chr6:61490850-61490950 |
| chr6 | 61966150 | 61966250 | 901-Lng-A-T  | 68  | chr6:61966150-61966250 |
| chr6 | 62219650 | 62219750 | 1090-Lng-A-T | 77  | chr6:62219650-62219750 |
| chr6 | 62261650 | 62261750 | 1065-Lng-B-T | 74  | chr6:62261650-62261750 |
| chr6 | 62456050 | 62456150 | 1188-Lng-A-T | 39  | chr6:62456050-62456150 |
| chr6 | 62592450 | 62592550 | 846-Lng-A-T  | 104 | chr6:62592450-62592550 |
| chr6 | 63209650 | 63209750 | 901-Lng-C-T  | 61  | chr6:63209650-63209750 |
| chr6 | 63679950 | 63680050 | 1065-Lng-A-T | 47  | chr6:63679950-63680050 |
| chr6 | 63917950 | 63918050 | 1065-Lng-A-T | 92  | chr6:63917950-63918050 |
| chr6 | 63930750 | 63930850 | 1065-Lng-A-T | 63  | chr6:63930750-63930850 |
| chr6 | 63953950 | 63954050 | 1065-Lng-C-T | 61  | chr6:63953950-63954050 |
| chr6 | 64026750 | 64026850 | 1065-Lng-B-T | 47  | chr6:64026750-64026850 |
| chr6 | 64096750 | 64096850 | 1072-Lng-A-T | 209 | chr6:64096750-64096850 |
| chr6 | 64117950 | 64118050 | 901-Lng-A-T  | 121 | chr6:64117950-64118050 |

**Table S2: SB Insertion regions**

|      |          |          |              |      |                        |
|------|----------|----------|--------------|------|------------------------|
| chr6 | 64146250 | 64146350 | 1065-Lng-C-T | 62   | chr6:64146250-64146350 |
| chr6 | 64344850 | 64344950 | 901-Lng-C-T  | 71   | chr6:64344850-64344950 |
| chr6 | 64548050 | 64548150 | 1004-Lng-A-T | 104  | chr6:64548050-64548150 |
| chr6 | 64550550 | 64550650 | 1151-Lng-A-T | 67   | chr6:64550550-64550650 |
| chr6 | 64718750 | 64718850 | 1188-Lng-A-T | 40   | chr6:64718750-64718850 |
| chr6 | 64746250 | 64746350 | 1151-Lng-A-T | 60   | chr6:64746250-64746350 |
| chr6 | 65059450 | 65059550 | 1167-Lng-A-T | 110  | chr6:65059450-65059550 |
| chr6 | 65062950 | 65063050 | 1223-Lng-B-T | 1342 | chr6:65062950-65063050 |
| chr6 | 65091650 | 65091750 | 1072-Lng-A-T | 124  | chr6:65091650-65091750 |
| chr6 | 65387450 | 65387550 | 901-Lng-C-T  | 55   | chr6:65387450-65387550 |
| chr6 | 65448850 | 65448950 | 1223-Lng-B-T | 278  | chr6:65448850-65448950 |
| chr6 | 65540950 | 65541050 | 1090-Lng-A-T | 87   | chr6:65540950-65541050 |
| chr6 | 65561950 | 65562050 | 1223-Lng-B-T | 39   | chr6:65561950-65562050 |
| chr6 | 65573350 | 65573450 | 1152-Lng-A-T | 54   | chr6:65573350-65573450 |
| chr6 | 65786750 | 65786850 | 901-Lng-C-T  | 77   | chr6:65786750-65786850 |
| chr6 | 65857050 | 65857150 | 1151-Lng-A-T | 242  | chr6:65857050-65857150 |
| chr6 | 65949250 | 65949350 | 1167-Lng-A-T | 92   | chr6:65949250-65949350 |
| chr6 | 66011350 | 66011450 | 1223-Lng-B-T | 227  | chr6:66011350-66011450 |
| chr6 | 66057050 | 66057150 | 1065-Lng-B-T | 86   | chr6:66057050-66057150 |
| chr6 | 66185350 | 66185450 | 1100-Lng-A-T | 51   | chr6:66185350-66185450 |
| chr6 | 66348350 | 66348450 | 1090-Lng-B-T | 804  | chr6:66348350-66348450 |
| chr6 | 66633650 | 66633750 | 1100-Lng-A-T | 64   | chr6:66633650-66633750 |
| chr6 | 66806950 | 66807050 | 1151-Lng-A-T | 452  | chr6:66806950-66807050 |
| chr6 | 66946650 | 66946750 | 1065-Lng-C-T | 970  | chr6:66946650-66946750 |
| chr6 | 67021950 | 67022050 | 1188-Lng-A-T | 42   | chr6:67021950-67022050 |
| chr6 | 67247150 | 67247250 | 1274-Lng-A-T | 163  | chr6:67247150-67247250 |
| chr6 | 67323850 | 67323950 | 1065-Lng-A-T | 60   | chr6:67323850-67323950 |
| chr6 | 67472850 | 67472950 | 1072-Lng-A-T | 125  | chr6:67472850-67472950 |
| chr6 | 67477650 | 67477750 | 1188-Lng-A-T | 75   | chr6:67477650-67477750 |
| chr6 | 67797850 | 67797950 | 1152-Lng-A-T | 301  | chr6:67797850-67797950 |
| chr6 | 67905650 | 67905750 | 1065-Lng-A-T | 132  | chr6:67905650-67905750 |
| chr6 | 67933950 | 67934050 | 1065-Lng-C-T | 67   | chr6:67933950-67934050 |
| chr6 | 67934250 | 67934350 | 1274-Lng-A-T | 51   | chr6:67934250-67934350 |
| chr6 | 67951850 | 67951950 | 1065-Lng-A-T | 81   | chr6:67951850-67951950 |
| chr6 | 68462350 | 68462450 | 901-Lng-C-T  | 76   | chr6:68462350-68462450 |
| chr6 | 68540650 | 68540750 | 901-Lng-D-T  | 430  | chr6:68540650-68540750 |
| chr6 | 68839550 | 68839650 | 1065-Lng-A-T | 61   | chr6:68839550-68839650 |
| chr6 | 68960250 | 68960350 | 1152-Lng-A-T | 104  | chr6:68960250-68960350 |
| chr6 | 69003350 | 69003450 | 1004-Lng-A-T | 91   | chr6:69003350-69003450 |
| chr6 | 69221550 | 69221650 | 846-Lng-A-T  | 590  | chr6:69221550-69221650 |
| chr6 | 69435350 | 69435450 | 1152-Lng-A-T | 67   | chr6:69435350-69435450 |
| chr6 | 69678950 | 69679050 | 901-Lng-C-T  | 181  | chr6:69678950-69679050 |
| chr6 | 69820150 | 69820250 | 1065-Lng-C-T | 77   | chr6:69820150-69820250 |
| chr6 | 69866550 | 69866650 | 1004-Lng-A-T | 74   | chr6:69866550-69866650 |
| chr6 | 69879950 | 69880050 | 1151-Lng-A-T | 54   | chr6:69879950-69880050 |
| chr6 | 69879950 | 69880050 | 1223-Lng-B-T | 37   | chr6:69879950-69880050 |

**Table S2: SB Insertion regions**

|      |          |          |              |      |                        |
|------|----------|----------|--------------|------|------------------------|
| chr6 | 69879950 | 69880050 | 1090-Lng-A-T | 50   | chr6:69879950-69880050 |
| chr6 | 69879950 | 69880050 | 901-Lng-A-T  | 72   | chr6:69879950-69880050 |
| chr6 | 69879950 | 69880050 | 1065-Lng-A-T | 51   | chr6:69879950-69880050 |
| chr6 | 69879950 | 69880050 | 1072-Lng-A-T | 103  | chr6:69879950-69880050 |
| chr6 | 69879950 | 69880050 | 1152-Lng-A-T | 34   | chr6:69879950-69880050 |
| chr6 | 69879950 | 69880050 | 1188-Lng-A-T | 45   | chr6:69879950-69880050 |
| chr6 | 69879950 | 69880050 | 901-Lng-B-T  | 39   | chr6:69879950-69880050 |
| chr6 | 69912250 | 69912350 | 901-Lng-D-T  | 913  | chr6:69912250-69912350 |
| chr6 | 69983750 | 69983850 | 1065-Lng-A-T | 73   | chr6:69983750-69983850 |
| chr6 | 70385650 | 70385750 | 1100-Lng-A-T | 72   | chr6:70385650-70385750 |
| chr6 | 70630950 | 70631050 | 1065-Lng-A-T | 62   | chr6:70630950-70631050 |
| chr6 | 70733950 | 70734050 | 1151-Lng-A-T | 93   | chr6:70733950-70734050 |
| chr6 | 70820750 | 70820850 | 1100-Lng-B-T | 6507 | chr6:70820750-70820850 |
| chr6 | 70841350 | 70841450 | 1274-Lng-A-T | 74   | chr6:70841350-70841450 |
| chr6 | 71060250 | 71060350 | 1223-Lng-A-T | 73   | chr6:71060250-71060350 |
| chr6 | 71230350 | 71230450 | 1274-Lng-A-T | 133  | chr6:71230350-71230450 |
| chr6 | 71327150 | 71327250 | 1065-Lng-A-T | 44   | chr6:71327150-71327250 |
| chr6 | 71343950 | 71344050 | 1090-Lng-A-T | 44   | chr6:71343950-71344050 |
| chr6 | 71349450 | 71349550 | 1100-Lng-A-T | 58   | chr6:71349450-71349550 |
| chr6 | 71371350 | 71371450 | 1223-Lng-C-T | 43   | chr6:71371350-71371450 |
| chr6 | 71372850 | 71372950 | 901-Lng-D-T  | 144  | chr6:71372850-71372950 |
| chr6 | 71520850 | 71520950 | 1152-Lng-A-T | 83   | chr6:71520850-71520950 |
| chr6 | 71793350 | 71793450 | 1274-Lng-A-T | 173  | chr6:71793350-71793450 |
| chr6 | 72085950 | 72086050 | 1223-Lng-A-T | 177  | chr6:72085950-72086050 |
| chr6 | 72178950 | 72179050 | 1100-Lng-A-T | 63   | chr6:72178950-72179050 |
| chr6 | 72229750 | 72229850 | 1151-Lng-A-T | 69   | chr6:72229750-72229850 |
| chr6 | 72248950 | 72249050 | 1090-Lng-A-T | 54   | chr6:72248950-72249050 |
| chr6 | 72289050 | 72289150 | 1223-Lng-B-T | 46   | chr6:72289050-72289150 |
| chr6 | 72293550 | 72293650 | 1223-Lng-B-T | 88   | chr6:72293550-72293650 |
| chr6 | 72317050 | 72317150 | 1223-Lng-B-T | 41   | chr6:72317050-72317150 |
| chr6 | 72545550 | 72545650 | 846-Lng-A-T  | 160  | chr6:72545550-72545650 |
| chr6 | 72732550 | 72732650 | 1274-Lng-A-T | 73   | chr6:72732550-72732650 |
| chr6 | 72735750 | 72735850 | 1151-Lng-A-T | 360  | chr6:72735750-72735850 |
| chr6 | 72792650 | 72792750 | 1065-Lng-B-T | 575  | chr6:72792650-72792750 |
| chr6 | 72796650 | 72796750 | 1100-Lng-A-T | 81   | chr6:72796650-72796750 |
| chr6 | 72799950 | 72800050 | 901-Lng-A-T  | 58   | chr6:72799950-72800050 |
| chr6 | 72824650 | 72824750 | 1223-Lng-A-T | 97   | chr6:72824650-72824750 |
| chr6 | 72826050 | 72826150 | 1100-Lng-A-T | 160  | chr6:72826050-72826150 |
| chr6 | 72839350 | 72839450 | 1100-Lng-A-T | 99   | chr6:72839350-72839450 |
| chr6 | 72923850 | 72923950 | 1223-Lng-C-T | 46   | chr6:72923850-72923950 |
| chr6 | 72943950 | 72944050 | 1065-Lng-C-T | 116  | chr6:72943950-72944050 |
| chr6 | 73110650 | 73110750 | 901-Lng-C-T  | 83   | chr6:73110650-73110750 |
| chr6 | 73172250 | 73172350 | 1065-Lng-C-T | 87   | chr6:73172250-73172350 |
| chr6 | 73288050 | 73288150 | 901-Lng-B-T  | 98   | chr6:73288050-73288150 |
| chr6 | 73563050 | 73563150 | 1100-Lng-A-T | 142  | chr6:73563050-73563150 |
| chr6 | 73857950 | 73858050 | 901-Lng-A-T  | 141  | chr6:73857950-73858050 |

**Table S2: SB Insertion regions**

|      |          |          |              |     |                        |
|------|----------|----------|--------------|-----|------------------------|
| chr6 | 74083150 | 74083250 | 1004-Lng-A-T | 80  | chr6:74083150-74083250 |
| chr6 | 74175850 | 74175950 | 1072-Lng-A-T | 48  | chr6:74175850-74175950 |
| chr6 | 74533450 | 74533550 | 901-Lng-B-T  | 216 | chr6:74533450-74533550 |
| chr6 | 74638550 | 74638650 | 901-Lng-B-T  | 108 | chr6:74638550-74638650 |
| chr6 | 74873650 | 74873750 | 901-Lng-D-T  | 163 | chr6:74873650-74873750 |
| chr6 | 75159650 | 75159750 | 901-Lng-A-T  | 76  | chr6:75159650-75159750 |
| chr6 | 75167850 | 75167950 | 1065-Lng-B-T | 77  | chr6:75167850-75167950 |
| chr6 | 75347850 | 75347950 | 1072-Lng-A-T | 49  | chr6:75347850-75347950 |
| chr6 | 75370650 | 75370750 | 901-Lng-A-T  | 390 | chr6:75370650-75370750 |
| chr6 | 75372450 | 75372550 | 1274-Lng-A-T | 88  | chr6:75372450-75372550 |
| chr6 | 75392650 | 75392750 | 901-Lng-C-T  | 56  | chr6:75392650-75392750 |
| chr6 | 75447150 | 75447250 | 1072-Lng-A-T | 251 | chr6:75447150-75447250 |
| chr6 | 75538950 | 75539050 | 846-Lng-A-T  | 107 | chr6:75538950-75539050 |
| chr6 | 75844650 | 75844750 | 1065-Lng-C-T | 81  | chr6:75844650-75844750 |
| chr6 | 75853550 | 75853650 | 1004-Lng-A-T | 53  | chr6:75853550-75853650 |
| chr6 | 76064250 | 76064350 | 1004-Lng-A-T | 69  | chr6:76064250-76064350 |
| chr6 | 76450350 | 76450450 | 1065-Lng-A-T | 51  | chr6:76450350-76450450 |
| chr6 | 76551750 | 76551850 | 1004-Lng-A-T | 61  | chr6:76551750-76551850 |
| chr6 | 76682350 | 76682450 | 901-Lng-A-T  | 177 | chr6:76682350-76682450 |
| chr6 | 77101450 | 77101550 | 1167-Lng-A-T | 98  | chr6:77101450-77101550 |
| chr6 | 77208650 | 77208750 | 1274-Lng-A-T | 65  | chr6:77208650-77208750 |
| chr6 | 77290950 | 77291050 | 1065-Lng-B-T | 39  | chr6:77290950-77291050 |
| chr6 | 77329650 | 77329750 | 1065-Lng-C-T | 72  | chr6:77329650-77329750 |
| chr6 | 77441150 | 77441250 | 1065-Lng-A-T | 46  | chr6:77441150-77441250 |
| chr6 | 77453350 | 77453450 | 901-Lng-B-T  | 122 | chr6:77453350-77453450 |
| chr6 | 77492350 | 77492450 | 1152-Lng-A-T | 102 | chr6:77492350-77492450 |
| chr6 | 77647650 | 77647750 | 1065-Lng-A-T | 86  | chr6:77647650-77647750 |
| chr6 | 77649750 | 77649850 | 1004-Lng-A-T | 85  | chr6:77649750-77649850 |
| chr6 | 77685950 | 77686050 | 901-Lng-D-T  | 495 | chr6:77685950-77686050 |
| chr6 | 77820050 | 77820150 | 1151-Lng-A-T | 66  | chr6:77820050-77820150 |
| chr6 | 78076950 | 78077050 | 1167-Lng-A-T | 58  | chr6:78076950-78077050 |
| chr6 | 78332650 | 78332750 | 1152-Lng-A-T | 107 | chr6:78332650-78332750 |
| chr6 | 78445350 | 78445450 | 1065-Lng-C-T | 81  | chr6:78445350-78445450 |
| chr6 | 78770950 | 78771050 | 1152-Lng-A-T | 34  | chr6:78770950-78771050 |
| chr6 | 78809550 | 78809650 | 1223-Lng-B-T | 47  | chr6:78809550-78809650 |
| chr6 | 78912850 | 78912950 | 901-Lng-C-T  | 148 | chr6:78912850-78912950 |
| chr6 | 78964250 | 78964350 | 1004-Lng-A-T | 49  | chr6:78964250-78964350 |
| chr6 | 79015250 | 79015350 | 901-Lng-B-T  | 253 | chr6:79015250-79015350 |
| chr6 | 79349750 | 79349850 | 1223-Lng-C-T | 45  | chr6:79349750-79349850 |
| chr6 | 79475850 | 79475950 | 901-Lng-D-T  | 709 | chr6:79475850-79475950 |
| chr6 | 79557050 | 79557150 | 1152-Lng-A-T | 76  | chr6:79557050-79557150 |
| chr6 | 79644050 | 79644150 | 1274-Lng-A-T | 110 | chr6:79644050-79644150 |
| chr6 | 79695450 | 79695550 | 901-Lng-D-T  | 191 | chr6:79695450-79695550 |
| chr6 | 79746150 | 79746250 | 1090-Lng-B-T | 178 | chr6:79746150-79746250 |
| chr6 | 79978450 | 79978550 | 846-Lng-A-T  | 80  | chr6:79978450-79978550 |
| chr6 | 80088650 | 80088750 | 1274-Lng-A-T | 225 | chr6:80088650-80088750 |



**Table S2: SB Insertion regions**

|      |          |          |              |     |                        |
|------|----------|----------|--------------|-----|------------------------|
| chr6 | 80091250 | 80091350 | 1223-Lng-A-T | 249 | chr6:80091250-80091350 |
| chr6 | 80162050 | 80162150 | 1004-Lng-A-T | 118 | chr6:80162050-80162150 |
| chr6 | 80312750 | 80312850 | 1004-Lng-A-T | 64  | chr6:80312750-80312850 |
| chr6 | 80320250 | 80320350 | 1090-Lng-A-T | 110 | chr6:80320250-80320350 |
| chr6 | 80534850 | 80534950 | 1072-Lng-A-T | 53  | chr6:80534850-80534950 |
| chr6 | 80762050 | 80762150 | 901-Lng-B-T  | 430 | chr6:80762050-80762150 |
| chr6 | 80790050 | 80790150 | 1274-Lng-A-T | 70  | chr6:80790050-80790150 |
| chr6 | 80998250 | 80998350 | 901-Lng-B-T  | 36  | chr6:80998250-80998350 |
| chr6 | 81172850 | 81172950 | 1065-Lng-A-T | 503 | chr6:81172850-81172950 |
| chr6 | 81207150 | 81207250 | 1065-Lng-A-T | 40  | chr6:81207150-81207250 |
| chr6 | 81371550 | 81371650 | 1004-Lng-A-T | 114 | chr6:81371550-81371650 |
| chr6 | 81456450 | 81456550 | 1274-Lng-A-T | 165 | chr6:81456450-81456550 |
| chr6 | 81458450 | 81458550 | 1065-Lng-C-T | 61  | chr6:81458450-81458550 |
| chr6 | 81458450 | 81458550 | 1072-Lng-A-T | 101 | chr6:81458450-81458550 |
| chr6 | 81543750 | 81543850 | 1223-Lng-B-T | 45  | chr6:81543750-81543850 |
| chr6 | 81811850 | 81811950 | 1065-Lng-C-T | 61  | chr6:81811850-81811950 |
| chr6 | 82030850 | 82030950 | 1223-Lng-B-T | 34  | chr6:82030850-82030950 |
| chr6 | 82149050 | 82149150 | 1090-Lng-A-T | 253 | chr6:82149050-82149150 |
| chr6 | 82566050 | 82566150 | 901-Lng-D-T  | 390 | chr6:82566050-82566150 |
| chr6 | 82696450 | 82696550 | 1223-Lng-B-T | 287 | chr6:82696450-82696550 |
| chr6 | 82745350 | 82745450 | 1065-Lng-A-T | 102 | chr6:82745350-82745450 |
| chr6 | 82758850 | 82758950 | 901-Lng-A-T  | 293 | chr6:82758850-82758950 |
| chr6 | 82844350 | 82844450 | 1004-Lng-A-T | 56  | chr6:82844350-82844450 |
| chr6 | 82848650 | 82848750 | 901-Lng-A-T  | 89  | chr6:82848650-82848750 |
| chr6 | 82892050 | 82892150 | 1065-Lng-B-T | 41  | chr6:82892050-82892150 |
| chr6 | 83038350 | 83038450 | 1167-Lng-A-T | 264 | chr6:83038350-83038450 |
| chr6 | 83063350 | 83063450 | 1167-Lng-A-T | 67  | chr6:83063350-83063450 |
| chr6 | 83203850 | 83203950 | 1188-Lng-A-T | 40  | chr6:83203850-83203950 |
| chr6 | 83397450 | 83397550 | 1152-Lng-A-T | 49  | chr6:83397450-83397550 |
| chr6 | 83449450 | 83449550 | 1223-Lng-D-T | 389 | chr6:83449450-83449550 |
| chr6 | 83560150 | 83560250 | 901-Lng-C-T  | 168 | chr6:83560150-83560250 |
| chr6 | 83753650 | 83753750 | 1274-Lng-A-T | 55  | chr6:83753650-83753750 |
| chr6 | 83787350 | 83787450 | 1151-Lng-A-T | 82  | chr6:83787350-83787450 |
| chr6 | 83881950 | 83882050 | 1151-Lng-A-T | 273 | chr6:83881950-83882050 |
| chr6 | 83890650 | 83890750 | 1223-Lng-B-T | 48  | chr6:83890650-83890750 |
| chr6 | 83900550 | 83900650 | 1152-Lng-A-T | 42  | chr6:83900550-83900650 |
| chr6 | 83918550 | 83918650 | 846-Lng-A-T  | 215 | chr6:83918550-83918650 |
| chr6 | 83925950 | 83926050 | 1100-Lng-A-T | 98  | chr6:83925950-83926050 |
| chr6 | 84126350 | 84126450 | 1065-Lng-C-T | 95  | chr6:84126350-84126450 |
| chr6 | 84168850 | 84168950 | 1223-Lng-C-T | 46  | chr6:84168850-84168950 |
| chr6 | 84600350 | 84600450 | 1223-Lng-C-T | 73  | chr6:84600350-84600450 |
| chr6 | 84797950 | 84798050 | 1004-Lng-A-T | 105 | chr6:84797950-84798050 |
| chr6 | 84844450 | 84844550 | 1223-Lng-B-T | 125 | chr6:84844450-84844550 |
| chr6 | 84856150 | 84856250 | 1188-Lng-A-T | 43  | chr6:84856150-84856250 |
| chr6 | 84908050 | 84908150 | 1152-Lng-A-T | 99  | chr6:84908050-84908150 |
| chr6 | 85014850 | 85014950 | 1223-Lng-B-T | 210 | chr6:85014850-85014950 |

**Table S2: SB Insertion regions**

|      |          |          |              |      |                        |
|------|----------|----------|--------------|------|------------------------|
| chr6 | 85223150 | 85223250 | 1274-Lng-A-T | 51   | chr6:85223150-85223250 |
| chr6 | 85223550 | 85223650 | 1151-Lng-A-T | 166  | chr6:85223550-85223650 |
| chr6 | 85259950 | 85260050 | 1223-Lng-B-T | 43   | chr6:85259950-85260050 |
| chr6 | 85285850 | 85285950 | 1100-Lng-B-T | 68   | chr6:85285850-85285950 |
| chr6 | 85393450 | 85393550 | 1167-Lng-A-T | 136  | chr6:85393450-85393550 |
| chr6 | 85393950 | 85394050 | 1072-Lng-A-T | 79   | chr6:85393950-85394050 |
| chr6 | 85400650 | 85400750 | 1065-Lng-B-T | 74   | chr6:85400650-85400750 |
| chr6 | 85405550 | 85405650 | 901-Lng-A-T  | 63   | chr6:85405550-85405650 |
| chr6 | 85410350 | 85410450 | 1152-Lng-A-T | 60   | chr6:85410350-85410450 |
| chr6 | 85515950 | 85516050 | 901-Lng-B-T  | 179  | chr6:85515950-85516050 |
| chr6 | 85806450 | 85806550 | 1065-Lng-B-T | 67   | chr6:85806450-85806550 |
| chr6 | 85869650 | 85869750 | 1188-Lng-A-T | 47   | chr6:85869650-85869750 |
| chr6 | 85882350 | 85882450 | 1100-Lng-A-T | 112  | chr6:85882350-85882450 |
| chr6 | 85908250 | 85908350 | 1152-Lng-A-T | 86   | chr6:85908250-85908350 |
| chr6 | 86062850 | 86062950 | 1167-Lng-A-T | 127  | chr6:86062850-86062950 |
| chr6 | 86076050 | 86076150 | 1167-Lng-A-T | 93   | chr6:86076050-86076150 |
| chr6 | 86147950 | 86148050 | 1167-Lng-A-T | 55   | chr6:86147950-86148050 |
| chr6 | 86211950 | 86212050 | 1188-Lng-A-T | 34   | chr6:86211950-86212050 |
| chr6 | 86239450 | 86239550 | 1065-Lng-B-T | 56   | chr6:86239450-86239550 |
| chr6 | 86374650 | 86374750 | 901-Lng-C-T  | 46   | chr6:86374650-86374750 |
| chr6 | 86515850 | 86515950 | 1004-Lng-A-T | 56   | chr6:86515850-86515950 |
| chr6 | 86571950 | 86572050 | 1090-Lng-B-T | 161  | chr6:86571950-86572050 |
| chr6 | 86596750 | 86596850 | 1065-Lng-A-T | 43   | chr6:86596750-86596850 |
| chr6 | 86607950 | 86608050 | 1151-Lng-A-T | 67   | chr6:86607950-86608050 |
| chr6 | 86641750 | 86641850 | 1274-Lng-A-T | 162  | chr6:86641750-86641850 |
| chr6 | 86722950 | 86723050 | 901-Lng-B-T  | 78   | chr6:86722950-86723050 |
| chr6 | 86803250 | 86803350 | 1152-Lng-A-T | 125  | chr6:86803250-86803350 |
| chr6 | 86804250 | 86804350 | 1188-Lng-A-T | 35   | chr6:86804250-86804350 |
| chr6 | 86863650 | 86863750 | 1167-Lng-A-T | 58   | chr6:86863650-86863750 |
| chr6 | 86889450 | 86889550 | 1188-Lng-A-T | 36   | chr6:86889450-86889550 |
| chr6 | 86895950 | 86896050 | 1004-Lng-A-T | 105  | chr6:86895950-86896050 |
| chr6 | 86957250 | 86957350 | 901-Lng-A-T  | 408  | chr6:86957250-86957350 |
| chr6 | 87008850 | 87008950 | 1188-Lng-A-T | 1900 | chr6:87008850-87008950 |
| chr6 | 87076650 | 87076750 | 846-Lng-A-T  | 84   | chr6:87076650-87076750 |
| chr6 | 87122150 | 87122250 | 1004-Lng-A-T | 86   | chr6:87122150-87122250 |
| chr6 | 87134650 | 87134750 | 1223-Lng-D-T | 41   | chr6:87134650-87134750 |
| chr6 | 87221250 | 87221350 | 1100-Lng-A-T | 82   | chr6:87221250-87221350 |
| chr6 | 87369750 | 87369850 | 1223-Lng-A-T | 168  | chr6:87369750-87369850 |
| chr6 | 87637950 | 87638050 | 1100-Lng-B-T | 51   | chr6:87637950-87638050 |
| chr6 | 87870650 | 87870750 | 901-Lng-C-T  | 63   | chr6:87870650-87870750 |
| chr6 | 87966050 | 87966150 | 1065-Lng-B-T | 46   | chr6:87966050-87966150 |
| chr6 | 87994150 | 87994250 | 1223-Lng-D-T | 2564 | chr6:87994150-87994250 |
| chr6 | 88044850 | 88044950 | 901-Lng-A-T  | 67   | chr6:88044850-88044950 |
| chr6 | 88077650 | 88077750 | 901-Lng-B-T  | 91   | chr6:88077650-88077750 |
| chr6 | 88187750 | 88187850 | 1188-Lng-A-T | 34   | chr6:88187750-88187850 |
| chr6 | 88268250 | 88268350 | 1274-Lng-A-T | 80   | chr6:88268250-88268350 |

**Table S2: SB Insertion regions**

|      |          |          |              |      |                        |
|------|----------|----------|--------------|------|------------------------|
| chr6 | 88291350 | 88291450 | 1090-Lng-A-T | 80   | chr6:88291350-88291450 |
| chr6 | 88343050 | 88343150 | 1090-Lng-A-T | 150  | chr6:88343050-88343150 |
| chr6 | 88374250 | 88374350 | 1090-Lng-B-T | 474  | chr6:88374250-88374350 |
| chr6 | 88603150 | 88603250 | 1065-Lng-B-T | 123  | chr6:88603150-88603250 |
| chr6 | 88699850 | 88699950 | 1274-Lng-A-T | 67   | chr6:88699850-88699950 |
| chr6 | 88712150 | 88712250 | 1004-Lng-A-T | 57   | chr6:88712150-88712250 |
| chr6 | 88776450 | 88776550 | 1223-Lng-A-T | 80   | chr6:88776450-88776550 |
| chr6 | 88884350 | 88884450 | 1065-Lng-B-T | 51   | chr6:88884350-88884450 |
| chr6 | 89168850 | 89168950 | 1167-Lng-A-T | 64   | chr6:89168850-89168950 |
| chr6 | 89268250 | 89268350 | 901-Lng-D-T  | 124  | chr6:89268250-89268350 |
| chr6 | 89297250 | 89297350 | 1274-Lng-A-T | 94   | chr6:89297250-89297350 |
| chr6 | 89331750 | 89331850 | 1072-Lng-A-T | 188  | chr6:89331750-89331850 |
| chr6 | 89409050 | 89409150 | 1090-Lng-A-T | 1258 | chr6:89409050-89409150 |
| chr6 | 89620150 | 89620250 | 1167-Lng-A-T | 106  | chr6:89620150-89620250 |
| chr6 | 89627850 | 89627950 | 1065-Lng-A-T | 66   | chr6:89627850-89627950 |
| chr6 | 90124450 | 90124550 | 1152-Lng-A-T | 116  | chr6:90124450-90124550 |
| chr6 | 90326450 | 90326550 | 846-Lng-A-T  | 173  | chr6:90326450-90326550 |
| chr6 | 90326450 | 90326550 | 1152-Lng-A-T | 349  | chr6:90326450-90326550 |
| chr6 | 90629150 | 90629250 | 1223-Lng-B-T | 49   | chr6:90629150-90629250 |
| chr6 | 90645250 | 90645350 | 1223-Lng-D-T | 44   | chr6:90645250-90645350 |
| chr6 | 90748850 | 90748950 | 1065-Lng-B-T | 76   | chr6:90748850-90748950 |
| chr6 | 90764650 | 90764750 | 1152-Lng-A-T | 32   | chr6:90764650-90764750 |
| chr6 | 90772850 | 90772950 | 1072-Lng-A-T | 51   | chr6:90772850-90772950 |
| chr6 | 90791550 | 90791650 | 1188-Lng-A-T | 58   | chr6:90791550-90791650 |
| chr6 | 90791650 | 90791750 | 1188-Lng-A-T | 338  | chr6:90791650-90791750 |
| chr6 | 90801950 | 90802050 | 901-Lng-A-T  | 109  | chr6:90801950-90802050 |
| chr6 | 90852850 | 90852950 | 1167-Lng-A-T | 119  | chr6:90852850-90852950 |
| chr6 | 90852950 | 90853050 | 1152-Lng-A-T | 35   | chr6:90852950-90853050 |
| chr6 | 90929650 | 90929750 | 1072-Lng-A-T | 48   | chr6:90929650-90929750 |
| chr6 | 90930750 | 90930850 | 1167-Lng-A-T | 56   | chr6:90930750-90930850 |
| chr6 | 90945350 | 90945450 | 1167-Lng-A-T | 69   | chr6:90945350-90945450 |
| chr6 | 91339650 | 91339750 | 901-Lng-C-T  | 84   | chr6:91339650-91339750 |
| chr6 | 91346650 | 91346750 | 1152-Lng-A-T | 44   | chr6:91346650-91346750 |
| chr6 | 91401150 | 91401250 | 1065-Lng-A-T | 72   | chr6:91401150-91401250 |
| chr6 | 91674250 | 91674350 | 901-Lng-C-T  | 104  | chr6:91674250-91674350 |
| chr6 | 91767750 | 91767850 | 1072-Lng-A-T | 51   | chr6:91767750-91767850 |
| chr6 | 91883450 | 91883550 | 1223-Lng-D-T | 53   | chr6:91883450-91883550 |
| chr6 | 92050150 | 92050250 | 901-Lng-A-T  | 702  | chr6:92050150-92050250 |
| chr6 | 92051250 | 92051350 | 1223-Lng-B-T | 38   | chr6:92051250-92051350 |
| chr6 | 92062850 | 92062950 | 1167-Lng-A-T | 53   | chr6:92062850-92062950 |
| chr6 | 92075650 | 92075750 | 846-Lng-A-T  | 50   | chr6:92075650-92075750 |
| chr6 | 92110750 | 92110850 | 1065-Lng-C-T | 86   | chr6:92110750-92110850 |
| chr6 | 92114650 | 92114750 | 1152-Lng-A-T | 64   | chr6:92114650-92114750 |
| chr6 | 92587850 | 92587950 | 901-Lng-B-T  | 154  | chr6:92587850-92587950 |
| chr6 | 92655350 | 92655450 | 1223-Lng-D-T | 63   | chr6:92655350-92655450 |
| chr6 | 92723650 | 92723750 | 1188-Lng-A-T | 63   | chr6:92723650-92723750 |

**Table S2: SB Insertion regions**

|      |          |          |              |      |                        |
|------|----------|----------|--------------|------|------------------------|
| chr6 | 92795050 | 92795150 | 901-Lng-C-T  | 29   | chr6:92795050-92795150 |
| chr6 | 92861350 | 92861450 | 901-Lng-A-T  | 161  | chr6:92861350-92861450 |
| chr6 | 92977150 | 92977250 | 901-Lng-C-T  | 45   | chr6:92977150-92977250 |
| chr6 | 93089250 | 93089350 | 1065-Lng-A-T | 48   | chr6:93089250-93089350 |
| chr6 | 93112950 | 93113050 | 1167-Lng-A-T | 132  | chr6:93112950-93113050 |
| chr6 | 93136250 | 93136350 | 901-Lng-C-T  | 55   | chr6:93136250-93136350 |
| chr6 | 93196950 | 93197050 | 1100-Lng-A-T | 88   | chr6:93196950-93197050 |
| chr6 | 93272250 | 93272350 | 901-Lng-C-T  | 68   | chr6:93272250-93272350 |
| chr6 | 93376850 | 93376950 | 1065-Lng-C-T | 61   | chr6:93376850-93376950 |
| chr6 | 93439050 | 93439150 | 1223-Lng-A-T | 231  | chr6:93439050-93439150 |
| chr6 | 93677650 | 93677750 | 1004-Lng-A-T | 82   | chr6:93677650-93677750 |
| chr6 | 93709150 | 93709250 | 1065-Lng-B-T | 61   | chr6:93709150-93709250 |
| chr6 | 93709550 | 93709650 | 901-Lng-A-T  | 52   | chr6:93709550-93709650 |
| chr6 | 93710650 | 93710750 | 901-Lng-C-T  | 33   | chr6:93710650-93710750 |
| chr6 | 93726550 | 93726650 | 1151-Lng-A-T | 196  | chr6:93726550-93726650 |
| chr6 | 93733550 | 93733650 | 901-Lng-A-T  | 83   | chr6:93733550-93733650 |
| chr6 | 93733650 | 93733750 | 1100-Lng-A-T | 59   | chr6:93733650-93733750 |
| chr6 | 93733650 | 93733750 | 846-Lng-A-T  | 100  | chr6:93733650-93733750 |
| chr6 | 93733650 | 93733750 | 901-Lng-B-T  | 122  | chr6:93733650-93733750 |
| chr6 | 93733650 | 93733750 | 1004-Lng-A-T | 57   | chr6:93733650-93733750 |
| chr6 | 93757850 | 93757950 | 1151-Lng-A-T | 189  | chr6:93757850-93757950 |
| chr6 | 93815650 | 93815750 | 1223-Lng-C-T | 47   | chr6:93815650-93815750 |
| chr6 | 93823050 | 93823150 | 901-Lng-C-T  | 919  | chr6:93823050-93823150 |
| chr6 | 93887950 | 93888050 | 1065-Lng-C-T | 2612 | chr6:93887950-93888050 |
| chr6 | 93912350 | 93912450 | 1152-Lng-A-T | 77   | chr6:93912350-93912450 |
| chr6 | 93938250 | 93938350 | 1167-Lng-A-T | 64   | chr6:93938250-93938350 |
| chr6 | 93939550 | 93939650 | 901-Lng-C-T  | 56   | chr6:93939550-93939650 |
| chr6 | 93980150 | 93980250 | 1065-Lng-B-T | 79   | chr6:93980150-93980250 |
| chr6 | 93988650 | 93988750 | 846-Lng-A-T  | 99   | chr6:93988650-93988750 |
| chr6 | 93990650 | 93990750 | 1274-Lng-A-T | 52   | chr6:93990650-93990750 |
| chr6 | 94002550 | 94002650 | 901-Lng-D-T  | 60   | chr6:94002550-94002650 |
| chr6 | 94036150 | 94036250 | 1065-Lng-A-T | 91   | chr6:94036150-94036250 |
| chr6 | 94036450 | 94036550 | 901-Lng-C-T  | 32   | chr6:94036450-94036550 |
| chr6 | 94054550 | 94054650 | 1223-Lng-A-T | 265  | chr6:94054550-94054650 |
| chr6 | 94064050 | 94064150 | 1152-Lng-A-T | 38   | chr6:94064050-94064150 |
| chr6 | 94069950 | 94070050 | 1065-Lng-C-T | 67   | chr6:94069950-94070050 |
| chr6 | 94106750 | 94106850 | 1152-Lng-A-T | 125  | chr6:94106750-94106850 |
| chr6 | 94160750 | 94160850 | 1065-Lng-B-T | 76   | chr6:94160750-94160850 |
| chr6 | 94163750 | 94163850 | 1004-Lng-A-T | 90   | chr6:94163750-94163850 |
| chr6 | 94182950 | 94183050 | 1223-Lng-A-T | 97   | chr6:94182950-94183050 |
| chr6 | 94191850 | 94191950 | 1152-Lng-A-T | 162  | chr6:94191850-94191950 |
| chr6 | 94200050 | 94200150 | 901-Lng-A-T  | 67   | chr6:94200050-94200150 |
| chr6 | 94213250 | 94213350 | 901-Lng-D-T  | 171  | chr6:94213250-94213350 |
| chr6 | 94229650 | 94229750 | 1274-Lng-A-T | 50   | chr6:94229650-94229750 |
| chr6 | 94231250 | 94231350 | 1100-Lng-B-T | 73   | chr6:94231250-94231350 |
| chr6 | 94248550 | 94248650 | 1151-Lng-A-T | 58   | chr6:94248550-94248650 |

**Table S2: SB Insertion regions**

|      |          |          |              |      |                        |
|------|----------|----------|--------------|------|------------------------|
| chr6 | 94452150 | 94452250 | 1223-Lng-A-T | 183  | chr6:94452150-94452250 |
| chr6 | 94513950 | 94514050 | 1223-Lng-C-T | 45   | chr6:94513950-94514050 |
| chr6 | 94554850 | 94554950 | 901-Lng-A-T  | 69   | chr6:94554850-94554950 |
| chr6 | 94585150 | 94585250 | 901-Lng-B-T  | 78   | chr6:94585150-94585250 |
| chr6 | 94589850 | 94589950 | 1274-Lng-A-T | 58   | chr6:94589850-94589950 |
| chr6 | 94629150 | 94629250 | 846-Lng-A-T  | 130  | chr6:94629150-94629250 |
| chr6 | 94633450 | 94633550 | 901-Lng-D-T  | 98   | chr6:94633450-94633550 |
| chr6 | 94636050 | 94636150 | 1274-Lng-A-T | 143  | chr6:94636050-94636150 |
| chr6 | 94647550 | 94647650 | 901-Lng-D-T  | 108  | chr6:94647550-94647650 |
| chr6 | 94699150 | 94699250 | 1223-Lng-A-T | 79   | chr6:94699150-94699250 |
| chr6 | 94931250 | 94931350 | 1223-Lng-B-T | 38   | chr6:94931250-94931350 |
| chr6 | 94958850 | 94958950 | 901-Lng-A-T  | 433  | chr6:94958850-94958950 |
| chr6 | 95144950 | 95145050 | 1223-Lng-A-T | 1123 | chr6:95144950-95145050 |
| chr6 | 95188250 | 95188350 | 1065-Lng-A-T | 39   | chr6:95188250-95188350 |
| chr6 | 95374850 | 95374950 | 901-Lng-C-T  | 171  | chr6:95374850-95374950 |
| chr6 | 95518850 | 95518950 | 1274-Lng-A-T | 88   | chr6:95518850-95518950 |
| chr6 | 95636850 | 95636950 | 1151-Lng-A-T | 77   | chr6:95636850-95636950 |
| chr6 | 95878850 | 95878950 | 1274-Lng-A-T | 141  | chr6:95878850-95878950 |
| chr6 | 96194150 | 96194250 | 1004-Lng-A-T | 54   | chr6:96194150-96194250 |
| chr6 | 96204450 | 96204550 | 1065-Lng-A-T | 888  | chr6:96204450-96204550 |
| chr6 | 96223350 | 96223450 | 1100-Lng-A-T | 103  | chr6:96223350-96223450 |
| chr6 | 96272350 | 96272450 | 1152-Lng-A-T | 61   | chr6:96272350-96272450 |
| chr6 | 96272450 | 96272550 | 1151-Lng-A-T | 55   | chr6:96272450-96272550 |
| chr6 | 96351550 | 96351650 | 1065-Lng-C-T | 71   | chr6:96351550-96351650 |
| chr6 | 96960050 | 96960150 | 1004-Lng-A-T | 83   | chr6:96960050-96960150 |
| chr6 | 97127450 | 97127550 | 901-Lng-B-T  | 256  | chr6:97127450-97127550 |
| chr6 | 97146450 | 97146550 | 901-Lng-B-T  | 57   | chr6:97146450-97146550 |
| chr6 | 97150450 | 97150550 | 1090-Lng-A-T | 48   | chr6:97150450-97150550 |
| chr6 | 97253450 | 97253550 | 1065-Lng-A-T | 651  | chr6:97253450-97253550 |
| chr6 | 97583150 | 97583250 | 901-Lng-C-T  | 69   | chr6:97583150-97583250 |
| chr6 | 97701950 | 97702050 | 1223-Lng-A-T | 74   | chr6:97701950-97702050 |
| chr6 | 97753450 | 97753550 | 1223-Lng-C-T | 46   | chr6:97753450-97753550 |
| chr6 | 97801450 | 97801550 | 1065-Lng-A-T | 40   | chr6:97801450-97801550 |
| chr6 | 97957750 | 97957850 | 1167-Lng-A-T | 113  | chr6:97957750-97957850 |
| chr6 | 98239850 | 98239950 | 1223-Lng-C-T | 52   | chr6:98239850-98239950 |
| chr6 | 98549050 | 98549150 | 1223-Lng-A-T | 83   | chr6:98549050-98549150 |
| chr6 | 98729350 | 98729450 | 1152-Lng-A-T | 54   | chr6:98729350-98729450 |
| chr6 | 98844550 | 98844650 | 1065-Lng-A-T | 57   | chr6:98844550-98844650 |
| chr6 | 98950650 | 98950750 | 1004-Lng-A-T | 51   | chr6:98950650-98950750 |
| chr6 | 99010550 | 99010650 | 1100-Lng-B-T | 51   | chr6:99010550-99010650 |
| chr6 | 99033450 | 99033550 | 1065-Lng-C-T | 80   | chr6:99033450-99033550 |
| chr6 | 99050950 | 99051050 | 1065-Lng-C-T | 304  | chr6:99050950-99051050 |
| chr6 | 99057350 | 99057450 | 1167-Lng-A-T | 80   | chr6:99057350-99057450 |
| chr6 | 99093550 | 99093650 | 1065-Lng-A-T | 59   | chr6:99093550-99093650 |
| chr6 | 99111050 | 99111150 | 1065-Lng-B-T | 957  | chr6:99111050-99111150 |
| chr6 | 99126950 | 99127050 | 1065-Lng-B-T | 226  | chr6:99126950-99127050 |

**Table S2: SB Insertion regions**

|      |           |           |              |     |                          |
|------|-----------|-----------|--------------|-----|--------------------------|
| chr6 | 99248750  | 99248850  | 901-Lng-A-T  | 58  | chr6:99248750-99248850   |
| chr6 | 99254450  | 99254550  | 1100-Lng-A-T | 82  | chr6:99254450-99254550   |
| chr6 | 99279350  | 99279450  | 1223-Lng-D-T | 44  | chr6:99279350-99279450   |
| chr6 | 99279350  | 99279450  | 901-Lng-C-T  | 45  | chr6:99279350-99279450   |
| chr6 | 99351350  | 99351450  | 1100-Lng-A-T | 112 | chr6:99351350-99351450   |
| chr6 | 99378550  | 99378650  | 901-Lng-D-T  | 138 | chr6:99378550-99378650   |
| chr6 | 99409550  | 99409650  | 1152-Lng-A-T | 35  | chr6:99409550-99409650   |
| chr6 | 99418750  | 99418850  | 901-Lng-C-T  | 30  | chr6:99418750-99418850   |
| chr6 | 99489350  | 99489450  | 1274-Lng-A-T | 136 | chr6:99489350-99489450   |
| chr6 | 99589550  | 99589650  | 1274-Lng-A-T | 88  | chr6:99589550-99589650   |
| chr6 | 99927150  | 99927250  | 1065-Lng-A-T | 75  | chr6:99927150-99927250   |
| chr6 | 99937750  | 99937850  | 1274-Lng-A-T | 90  | chr6:99937750-99937850   |
| chr6 | 99987150  | 99987250  | 1090-Lng-A-T | 67  | chr6:99987150-99987250   |
| chr6 | 100216350 | 100216450 | 1152-Lng-A-T | 37  | chr6:100216350-100216450 |
| chr6 | 100226650 | 100226750 | 1274-Lng-A-T | 107 | chr6:100226650-100226750 |
| chr6 | 100228150 | 100228250 | 1065-Lng-C-T | 94  | chr6:100228150-100228250 |
| chr6 | 100234850 | 100234950 | 901-Lng-C-T  | 89  | chr6:100234850-100234950 |
| chr6 | 100604950 | 100605050 | 1065-Lng-C-T | 70  | chr6:100604950-100605050 |
| chr6 | 100798350 | 100798450 | 901-Lng-A-T  | 91  | chr6:100798350-100798450 |
| chr6 | 100813450 | 100813550 | 901-Lng-B-T  | 105 | chr6:100813450-100813550 |
| chr6 | 100820550 | 100820650 | 1152-Lng-A-T | 93  | chr6:100820550-100820650 |
| chr6 | 100820950 | 100821050 | 1065-Lng-C-T | 65  | chr6:100820950-100821050 |
| chr6 | 100859150 | 100859250 | 901-Lng-C-T  | 55  | chr6:100859150-100859250 |
| chr6 | 101119950 | 101120050 | 1223-Lng-D-T | 168 | chr6:101119950-101120050 |
| chr6 | 101144450 | 101144550 | 1004-Lng-A-T | 122 | chr6:101144450-101144550 |
| chr6 | 101175850 | 101175950 | 901-Lng-B-T  | 153 | chr6:101175850-101175950 |
| chr6 | 101340650 | 101340750 | 1065-Lng-A-T | 82  | chr6:101340650-101340750 |
| chr6 | 101348450 | 101348550 | 901-Lng-C-T  | 365 | chr6:101348450-101348550 |
| chr6 | 101416450 | 101416550 | 1223-Lng-D-T | 48  | chr6:101416450-101416550 |
| chr6 | 101732750 | 101732850 | 901-Lng-C-T  | 42  | chr6:101732750-101732850 |
| chr6 | 102026550 | 102026650 | 1223-Lng-B-T | 34  | chr6:102026550-102026650 |
| chr6 | 102104350 | 102104450 | 1065-Lng-A-T | 104 | chr6:102104350-102104450 |
| chr6 | 102147250 | 102147350 | 1223-Lng-A-T | 131 | chr6:102147250-102147350 |
| chr6 | 102168550 | 102168650 | 1065-Lng-B-T | 83  | chr6:102168550-102168650 |
| chr6 | 102349450 | 102349550 | 1223-Lng-A-T | 215 | chr6:102349450-102349550 |
| chr6 | 102440450 | 102440550 | 1072-Lng-A-T | 151 | chr6:102440450-102440550 |
| chr6 | 102509450 | 102509550 | 1065-Lng-C-T | 87  | chr6:102509450-102509550 |
| chr6 | 102611050 | 102611150 | 1004-Lng-A-T | 51  | chr6:102611050-102611150 |
| chr6 | 102789050 | 102789150 | 1223-Lng-B-T | 38  | chr6:102789050-102789150 |
| chr6 | 103011650 | 103011750 | 901-Lng-B-T  | 51  | chr6:103011650-103011750 |
| chr6 | 103137050 | 103137150 | 1223-Lng-C-T | 57  | chr6:103137050-103137150 |
| chr6 | 103151950 | 103152050 | 1072-Lng-A-T | 55  | chr6:103151950-103152050 |
| chr6 | 103162150 | 103162250 | 1072-Lng-A-T | 48  | chr6:103162150-103162250 |
| chr6 | 103342850 | 103342950 | 1188-Lng-A-T | 62  | chr6:103342850-103342950 |
| chr6 | 103539850 | 103539950 | 1223-Lng-B-T | 45  | chr6:103539850-103539950 |
| chr6 | 103599050 | 103599150 | 846-Lng-A-T  | 69  | chr6:103599050-103599150 |

**Table S2: SB Insertion regions**

|      |           |           |              |      |                          |
|------|-----------|-----------|--------------|------|--------------------------|
| chr6 | 103599150 | 103599250 | 1090-Lng-A-T | 189  | chr6:103599150-103599250 |
| chr6 | 103599150 | 103599250 | 1065-Lng-B-T | 203  | chr6:103599150-103599250 |
| chr6 | 103599150 | 103599250 | 846-Lng-A-T  | 114  | chr6:103599150-103599250 |
| chr6 | 103599150 | 103599250 | 901-Lng-A-T  | 52   | chr6:103599150-103599250 |
| chr6 | 103599150 | 103599250 | 1152-Lng-A-T | 68   | chr6:103599150-103599250 |
| chr6 | 103599150 | 103599250 | 1065-Lng-C-T | 66   | chr6:103599150-103599250 |
| chr6 | 103599150 | 103599250 | 1100-Lng-B-T | 68   | chr6:103599150-103599250 |
| chr6 | 103599150 | 103599250 | 901-Lng-B-T  | 76   | chr6:103599150-103599250 |
| chr6 | 103733650 | 103733750 | 846-Lng-A-T  | 700  | chr6:103733650-103733750 |
| chr6 | 103874250 | 103874350 | 1152-Lng-A-T | 37   | chr6:103874250-103874350 |
| chr6 | 103903050 | 103903150 | 1223-Lng-A-T | 190  | chr6:103903050-103903150 |
| chr6 | 103962450 | 103962550 | 1065-Lng-A-T | 79   | chr6:103962450-103962550 |
| chr6 | 104071450 | 104071550 | 1152-Lng-A-T | 93   | chr6:104071450-104071550 |
| chr6 | 104075050 | 104075150 | 1151-Lng-A-T | 186  | chr6:104075050-104075150 |
| chr6 | 104147550 | 104147650 | 1072-Lng-A-T | 157  | chr6:104147550-104147650 |
| chr6 | 104664650 | 104664750 | 1065-Lng-B-T | 73   | chr6:104664650-104664750 |
| chr6 | 104716450 | 104716550 | 901-Lng-A-T  | 109  | chr6:104716450-104716550 |
| chr6 | 104807150 | 104807250 | 846-Lng-A-T  | 64   | chr6:104807150-104807250 |
| chr6 | 105053950 | 105054050 | 901-Lng-B-T  | 173  | chr6:105053950-105054050 |
| chr6 | 105132750 | 105132850 | 1065-Lng-C-T | 62   | chr6:105132750-105132850 |
| chr6 | 105135850 | 105135950 | 901-Lng-A-T  | 88   | chr6:105135850-105135950 |
| chr6 | 105392250 | 105392350 | 846-Lng-A-T  | 47   | chr6:105392250-105392350 |
| chr6 | 105451150 | 105451250 | 1223-Lng-D-T | 54   | chr6:105451150-105451250 |
| chr6 | 105486650 | 105486750 | 1223-Lng-C-T | 68   | chr6:105486650-105486750 |
| chr6 | 105778250 | 105778350 | 1274-Lng-A-T | 98   | chr6:105778250-105778350 |
| chr6 | 105882450 | 105882550 | 1004-Lng-A-T | 263  | chr6:105882450-105882550 |
| chr6 | 106027950 | 106028050 | 1188-Lng-A-T | 38   | chr6:106027950-106028050 |
| chr6 | 106036250 | 106036350 | 1065-Lng-A-T | 61   | chr6:106036250-106036350 |
| chr6 | 106071850 | 106071950 | 1152-Lng-A-T | 76   | chr6:106071850-106071950 |
| chr6 | 106072650 | 106072750 | 1065-Lng-A-T | 36   | chr6:106072650-106072750 |
| chr6 | 106259750 | 106259850 | 1090-Lng-A-T | 94   | chr6:106259750-106259850 |
| chr6 | 106342050 | 106342150 | 1065-Lng-C-T | 75   | chr6:106342050-106342150 |
| chr6 | 106360950 | 106361050 | 1065-Lng-A-T | 113  | chr6:106360950-106361050 |
| chr6 | 106383950 | 106384050 | 1100-Lng-A-T | 68   | chr6:106383950-106384050 |
| chr6 | 106386950 | 106387050 | 1090-Lng-B-T | 170  | chr6:106386950-106387050 |
| chr6 | 106396850 | 106396950 | 1274-Lng-A-T | 74   | chr6:106396850-106396950 |
| chr6 | 106413750 | 106413850 | 1223-Lng-A-T | 1311 | chr6:106413750-106413850 |
| chr6 | 106621050 | 106621150 | 1152-Lng-A-T | 51   | chr6:106621050-106621150 |
| chr6 | 106734350 | 106734450 | 1188-Lng-A-T | 44   | chr6:106734350-106734450 |
| chr6 | 106744150 | 106744250 | 1151-Lng-A-T | 290  | chr6:106744150-106744250 |
| chr6 | 107195650 | 107195750 | 1065-Lng-B-T | 78   | chr6:107195650-107195750 |
| chr6 | 107684750 | 107684850 | 846-Lng-A-T  | 48   | chr6:107684750-107684850 |
| chr6 | 107949950 | 107950050 | 901-Lng-A-T  | 149  | chr6:107949950-107950050 |
| chr6 | 108173150 | 108173250 | 1100-Lng-A-T | 70   | chr6:108173150-108173250 |
| chr6 | 108195450 | 108195550 | 1072-Lng-A-T | 139  | chr6:108195450-108195550 |
| chr6 | 108226450 | 108226550 | 1223-Lng-D-T | 40   | chr6:108226450-108226550 |

**Table S2: SB Insertion regions**

|      |           |           |              |      |                          |
|------|-----------|-----------|--------------|------|--------------------------|
| chr6 | 108388950 | 108389050 | 1151-Lng-A-T | 301  | chr6:108388950-108389050 |
| chr6 | 108438350 | 108438450 | 901-Lng-C-T  | 61   | chr6:108438350-108438450 |
| chr6 | 108440150 | 108440250 | 1151-Lng-A-T | 61   | chr6:108440150-108440250 |
| chr6 | 108447150 | 108447250 | 1223-Lng-C-T | 58   | chr6:108447150-108447250 |
| chr6 | 108450150 | 108450250 | 1090-Lng-A-T | 57   | chr6:108450150-108450250 |
| chr6 | 109157650 | 109157750 | 1100-Lng-A-T | 73   | chr6:109157650-109157750 |
| chr6 | 109192250 | 109192350 | 1065-Lng-A-T | 39   | chr6:109192250-109192350 |
| chr6 | 109214450 | 109214550 | 1004-Lng-A-T | 142  | chr6:109214450-109214550 |
| chr6 | 109435550 | 109435650 | 1152-Lng-A-T | 96   | chr6:109435550-109435650 |
| chr6 | 109513750 | 109513850 | 1167-Lng-A-T | 76   | chr6:109513750-109513850 |
| chr6 | 109579550 | 109579650 | 1151-Lng-A-T | 56   | chr6:109579550-109579650 |
| chr6 | 109704750 | 109704850 | 1223-Lng-D-T | 49   | chr6:109704750-109704850 |
| chr6 | 109712550 | 109712650 | 1152-Lng-A-T | 119  | chr6:109712550-109712650 |
| chr6 | 109773350 | 109773450 | 1100-Lng-A-T | 53   | chr6:109773350-109773450 |
| chr6 | 109836650 | 109836750 | 1072-Lng-A-T | 110  | chr6:109836650-109836750 |
| chr6 | 109874850 | 109874950 | 1065-Lng-A-T | 54   | chr6:109874850-109874950 |
| chr6 | 109882150 | 109882250 | 1065-Lng-A-T | 53   | chr6:109882150-109882250 |
| chr6 | 109974550 | 109974650 | 1188-Lng-A-T | 43   | chr6:109974550-109974650 |
| chr6 | 110100650 | 110100750 | 1065-Lng-A-T | 63   | chr6:110100650-110100750 |
| chr6 | 110133250 | 110133350 | 846-Lng-A-T  | 150  | chr6:110133250-110133350 |
| chr6 | 110327850 | 110327950 | 1004-Lng-A-T | 52   | chr6:110327850-110327950 |
| chr6 | 110424250 | 110424350 | 1065-Lng-B-T | 63   | chr6:110424250-110424350 |
| chr6 | 110439750 | 110439850 | 1090-Lng-A-T | 137  | chr6:110439750-110439850 |
| chr6 | 110589750 | 110589850 | 1065-Lng-A-T | 220  | chr6:110589750-110589850 |
| chr6 | 110604750 | 110604850 | 846-Lng-A-T  | 42   | chr6:110604750-110604850 |
| chr6 | 110740350 | 110740450 | 1223-Lng-A-T | 66   | chr6:110740350-110740450 |
| chr6 | 110818250 | 110818350 | 1004-Lng-A-T | 960  | chr6:110818250-110818350 |
| chr6 | 110877050 | 110877150 | 1065-Lng-A-T | 62   | chr6:110877050-110877150 |
| chr6 | 111016050 | 111016150 | 1065-Lng-B-T | 56   | chr6:111016050-111016150 |
| chr6 | 111029450 | 111029550 | 846-Lng-A-T  | 48   | chr6:111029450-111029550 |
| chr6 | 111111250 | 111111350 | 1004-Lng-A-T | 113  | chr6:111111250-111111350 |
| chr6 | 111407350 | 111407450 | 1065-Lng-C-T | 80   | chr6:111407350-111407450 |
| chr6 | 111450250 | 111450350 | 1065-Lng-C-T | 69   | chr6:111450250-111450350 |
| chr6 | 111606750 | 111606850 | 1274-Lng-A-T | 87   | chr6:111606750-111606850 |
| chr6 | 111805850 | 111805950 | 901-Lng-A-T  | 80   | chr6:111805850-111805950 |
| chr6 | 111846450 | 111846550 | 1223-Lng-B-T | 255  | chr6:111846450-111846550 |
| chr6 | 111907350 | 111907450 | 1152-Lng-A-T | 85   | chr6:111907350-111907450 |
| chr6 | 112124750 | 112124850 | 901-Lng-A-T  | 93   | chr6:112124750-112124850 |
| chr6 | 112216950 | 112217050 | 1100-Lng-A-T | 115  | chr6:112216950-112217050 |
| chr6 | 112558350 | 112558450 | 901-Lng-C-T  | 41   | chr6:112558350-112558450 |
| chr6 | 112746450 | 112746550 | 1004-Lng-A-T | 104  | chr6:112746450-112746550 |
| chr6 | 112983250 | 112983350 | 1274-Lng-A-T | 57   | chr6:112983250-112983350 |
| chr6 | 112993950 | 112994050 | 1065-Lng-A-T | 117  | chr6:112993950-112994050 |
| chr6 | 113040950 | 113041050 | 1167-Lng-A-T | 207  | chr6:113040950-113041050 |
| chr6 | 113103050 | 113103150 | 1274-Lng-A-T | 84   | chr6:113103050-113103150 |
| chr6 | 113205050 | 113205150 | 1223-Lng-B-T | 1610 | chr6:113205050-113205150 |



**Table S2: SB Insertion regions**

|      |           |           |              |     |                          |
|------|-----------|-----------|--------------|-----|--------------------------|
| chr6 | 113228450 | 113228550 | 901-Lng-D-T  | 210 | chr6:113228450-113228550 |
| chr6 | 113248850 | 113248950 | 1065-Lng-A-T | 68  | chr6:113248850-113248950 |
| chr6 | 113272250 | 113272350 | 1090-Lng-A-T | 56  | chr6:113272250-113272350 |
| chr6 | 113476950 | 113477050 | 1223-Lng-B-T | 59  | chr6:113476950-113477050 |
| chr6 | 113523750 | 113523850 | 1090-Lng-A-T | 68  | chr6:113523750-113523850 |
| chr6 | 113576350 | 113576450 | 1274-Lng-A-T | 88  | chr6:113576350-113576450 |
| chr6 | 113591150 | 113591250 | 1065-Lng-C-T | 63  | chr6:113591150-113591250 |
| chr6 | 113670750 | 113670850 | 1274-Lng-A-T | 62  | chr6:113670750-113670850 |
| chr6 | 113672850 | 113672950 | 1151-Lng-A-T | 60  | chr6:113672850-113672950 |
| chr6 | 113677750 | 113677850 | 1274-Lng-A-T | 127 | chr6:113677750-113677850 |
| chr6 | 113687750 | 113687850 | 846-Lng-A-T  | 169 | chr6:113687750-113687850 |
| chr6 | 113783250 | 113783350 | 1065-Lng-C-T | 140 | chr6:113783250-113783350 |
| chr6 | 113886750 | 113886850 | 901-Lng-D-T  | 233 | chr6:113886750-113886850 |
| chr6 | 113898250 | 113898350 | 1072-Lng-A-T | 88  | chr6:113898250-113898350 |
| chr6 | 114063750 | 114063850 | 901-Lng-B-T  | 56  | chr6:114063750-114063850 |
| chr6 | 114283050 | 114283150 | 1065-Lng-B-T | 89  | chr6:114283050-114283150 |
| chr6 | 114299450 | 114299550 | 1072-Lng-A-T | 54  | chr6:114299450-114299550 |
| chr6 | 114658150 | 114658250 | 1151-Lng-A-T | 91  | chr6:114658150-114658250 |
| chr6 | 114732150 | 114732250 | 1167-Lng-A-T | 69  | chr6:114732150-114732250 |
| chr6 | 114747550 | 114747650 | 1065-Lng-A-T | 41  | chr6:114747550-114747650 |
| chr6 | 114747550 | 114747650 | 1065-Lng-C-T | 304 | chr6:114747550-114747650 |
| chr6 | 114748650 | 114748750 | 1072-Lng-A-T | 120 | chr6:114748650-114748750 |
| chr6 | 114899750 | 114899850 | 1090-Lng-A-T | 58  | chr6:114899750-114899850 |
| chr6 | 114908050 | 114908150 | 1188-Lng-A-T | 84  | chr6:114908050-114908150 |
| chr6 | 114932350 | 114932450 | 1090-Lng-A-T | 64  | chr6:114932350-114932450 |
| chr6 | 114969750 | 114969850 | 1274-Lng-A-T | 59  | chr6:114969750-114969850 |
| chr6 | 114981450 | 114981550 | 1188-Lng-A-T | 72  | chr6:114981450-114981550 |
| chr6 | 115143450 | 115143550 | 1152-Lng-A-T | 162 | chr6:115143450-115143550 |
| chr6 | 115225350 | 115225450 | 1100-Lng-A-T | 108 | chr6:115225350-115225450 |
| chr6 | 115354250 | 115354350 | 1223-Lng-C-T | 62  | chr6:115354250-115354350 |
| chr6 | 115357350 | 115357450 | 1065-Lng-A-T | 69  | chr6:115357350-115357450 |
| chr6 | 115369450 | 115369550 | 1100-Lng-A-T | 133 | chr6:115369450-115369550 |
| chr6 | 115393450 | 115393550 | 1223-Lng-D-T | 45  | chr6:115393450-115393550 |
| chr6 | 115407450 | 115407550 | 1188-Lng-A-T | 101 | chr6:115407450-115407550 |
| chr6 | 115863250 | 115863350 | 901-Lng-A-T  | 125 | chr6:115863250-115863350 |
| chr6 | 115946350 | 115946450 | 846-Lng-A-T  | 113 | chr6:115946350-115946450 |
| chr6 | 115973150 | 115973250 | 846-Lng-A-T  | 79  | chr6:115973150-115973250 |
| chr6 | 115978150 | 115978250 | 1223-Lng-D-T | 41  | chr6:115978150-115978250 |
| chr6 | 116018650 | 116018750 | 1090-Lng-A-T | 50  | chr6:116018650-116018750 |
| chr6 | 116064550 | 116064650 | 901-Lng-B-T  | 225 | chr6:116064550-116064650 |
| chr6 | 116069550 | 116069650 | 1188-Lng-A-T | 58  | chr6:116069550-116069650 |
| chr6 | 116136950 | 116137050 | 1151-Lng-A-T | 217 | chr6:116136950-116137050 |
| chr6 | 116150350 | 116150450 | 1274-Lng-A-T | 131 | chr6:116150350-116150450 |
| chr6 | 116229050 | 116229150 | 1223-Lng-A-T | 94  | chr6:116229050-116229150 |
| chr6 | 116298850 | 116298950 | 1152-Lng-A-T | 106 | chr6:116298850-116298950 |
| chr6 | 116301650 | 116301750 | 1004-Lng-A-T | 76  | chr6:116301650-116301750 |

**Table S2: SB Insertion regions**

|      |           |           |              |     |                          |
|------|-----------|-----------|--------------|-----|--------------------------|
| chr6 | 116324050 | 116324150 | 901-Lng-A-T  | 111 | chr6:116324050-116324150 |
| chr6 | 116326250 | 116326350 | 1223-Lng-B-T | 251 | chr6:116326250-116326350 |
| chr6 | 116634250 | 116634350 | 1004-Lng-A-T | 80  | chr6:116634250-116634350 |
| chr6 | 116708850 | 116708950 | 1167-Lng-A-T | 50  | chr6:116708850-116708950 |
| chr6 | 116785750 | 116785850 | 1065-Lng-A-T | 77  | chr6:116785750-116785850 |
| chr6 | 116891850 | 116891950 | 1188-Lng-A-T | 61  | chr6:116891850-116891950 |
| chr6 | 116957450 | 116957550 | 1152-Lng-A-T | 365 | chr6:116957450-116957550 |
| chr6 | 117431250 | 117431350 | 901-Lng-A-T  | 66  | chr6:117431250-117431350 |
| chr6 | 117451150 | 117451250 | 1167-Lng-A-T | 92  | chr6:117451150-117451250 |
| chr6 | 118049750 | 118049850 | 1100-Lng-A-T | 69  | chr6:118049750-118049850 |
| chr6 | 118067250 | 118067350 | 901-Lng-A-T  | 115 | chr6:118067250-118067350 |
| chr6 | 118074750 | 118074850 | 901-Lng-A-T  | 489 | chr6:118074750-118074850 |
| chr6 | 118101250 | 118101350 | 1167-Lng-A-T | 77  | chr6:118101250-118101350 |
| chr6 | 118107450 | 118107550 | 901-Lng-C-T  | 28  | chr6:118107450-118107550 |
| chr6 | 118418950 | 118419050 | 1065-Lng-A-T | 73  | chr6:118418950-118419050 |
| chr6 | 118475650 | 118475750 | 1274-Lng-A-T | 73  | chr6:118475650-118475750 |
| chr6 | 118618750 | 118618850 | 1167-Lng-A-T | 203 | chr6:118618750-118618850 |
| chr6 | 118827650 | 118827750 | 1065-Lng-B-T | 57  | chr6:118827650-118827750 |
| chr6 | 118899950 | 118900050 | 1065-Lng-B-T | 55  | chr6:118899950-118900050 |
| chr6 | 118914450 | 118914550 | 1065-Lng-B-T | 96  | chr6:118914450-118914550 |
| chr6 | 118963450 | 118963550 | 1065-Lng-B-T | 41  | chr6:118963450-118963550 |
| chr6 | 118999750 | 118999850 | 1274-Lng-A-T | 86  | chr6:118999750-118999850 |
| chr6 | 119142450 | 119142550 | 1223-Lng-A-T | 134 | chr6:119142450-119142550 |
| chr6 | 119169350 | 119169450 | 901-Lng-C-T  | 32  | chr6:119169350-119169450 |
| chr6 | 119315250 | 119315350 | 1100-Lng-B-T | 160 | chr6:119315250-119315350 |
| chr6 | 119350350 | 119350450 | 1152-Lng-A-T | 65  | chr6:119350350-119350450 |
| chr6 | 119530050 | 119530150 | 1274-Lng-A-T | 116 | chr6:119530050-119530150 |
| chr6 | 119669350 | 119669450 | 1065-Lng-A-T | 61  | chr6:119669350-119669450 |
| chr6 | 119829550 | 119829650 | 846-Lng-A-T  | 95  | chr6:119829550-119829650 |
| chr6 | 119912250 | 119912350 | 901-Lng-C-T  | 251 | chr6:119912250-119912350 |
| chr6 | 119935250 | 119935350 | 1152-Lng-A-T | 290 | chr6:119935250-119935350 |
| chr6 | 119935250 | 119935350 | 1188-Lng-A-T | 438 | chr6:119935250-119935350 |
| chr6 | 119945050 | 119945150 | 901-Lng-C-T  | 63  | chr6:119945050-119945150 |
| chr6 | 119949750 | 119949850 | 1100-Lng-A-T | 52  | chr6:119949750-119949850 |
| chr6 | 119964750 | 119964850 | 1065-Lng-C-T | 412 | chr6:119964750-119964850 |
| chr6 | 119964750 | 119964850 | 1167-Lng-A-T | 58  | chr6:119964750-119964850 |
| chr6 | 119969750 | 119969850 | 901-Lng-A-T  | 65  | chr6:119969750-119969850 |
| chr6 | 120053650 | 120053750 | 1100-Lng-B-T | 60  | chr6:120053650-120053750 |
| chr6 | 120095850 | 120095950 | 901-Lng-A-T  | 91  | chr6:120095850-120095950 |
| chr6 | 120283950 | 120284050 | 1188-Lng-A-T | 205 | chr6:120283950-120284050 |
| chr6 | 120335550 | 120335650 | 1152-Lng-A-T | 98  | chr6:120335550-120335650 |
| chr6 | 120470750 | 120470850 | 1167-Lng-A-T | 53  | chr6:120470750-120470850 |
| chr6 | 120660950 | 120661050 | 1223-Lng-C-T | 236 | chr6:120660950-120661050 |
| chr6 | 120721250 | 120721350 | 901-Lng-A-T  | 645 | chr6:120721250-120721350 |
| chr6 | 120760350 | 120760450 | 1065-Lng-A-T | 34  | chr6:120760350-120760450 |
| chr6 | 120879650 | 120879750 | 901-Lng-C-T  | 35  | chr6:120879650-120879750 |

**Table S2: SB Insertion regions**

|      |           |           |              |      |                          |
|------|-----------|-----------|--------------|------|--------------------------|
| chr6 | 121022450 | 121022550 | 901-Lng-A-T  | 162  | chr6:121022450-121022550 |
| chr6 | 121197650 | 121197750 | 846-Lng-A-T  | 64   | chr6:121197650-121197750 |
| chr6 | 121269750 | 121269850 | 1072-Lng-A-T | 137  | chr6:121269750-121269850 |
| chr6 | 121296950 | 121297050 | 1065-Lng-B-T | 42   | chr6:121296950-121297050 |
| chr6 | 121892350 | 121892450 | 1065-Lng-B-T | 109  | chr6:121892350-121892450 |
| chr6 | 122214650 | 122214750 | 1152-Lng-A-T | 51   | chr6:122214650-122214750 |
| chr6 | 122721950 | 122722050 | 1004-Lng-A-T | 134  | chr6:122721950-122722050 |
| chr6 | 122746150 | 122746250 | 1090-Lng-A-T | 59   | chr6:122746150-122746250 |
| chr6 | 122831150 | 122831250 | 1065-Lng-B-T | 50   | chr6:122831150-122831250 |
| chr6 | 122961250 | 122961350 | 1065-Lng-A-T | 72   | chr6:122961250-122961350 |
| chr6 | 123871950 | 123872050 | 1072-Lng-A-T | 60   | chr6:123871950-123872050 |
| chr6 | 123932250 | 123932350 | 1274-Lng-A-T | 78   | chr6:123932250-123932350 |
| chr6 | 123956950 | 123957050 | 901-Lng-B-T  | 200  | chr6:123956950-123957050 |
| chr6 | 124554150 | 124554250 | 1223-Lng-B-T | 37   | chr6:124554150-124554250 |
| chr6 | 124692150 | 124692250 | 1223-Lng-B-T | 46   | chr6:124692150-124692250 |
| chr6 | 124960950 | 124961050 | 1090-Lng-B-T | 398  | chr6:124960950-124961050 |
| chr6 | 124969250 | 124969350 | 1223-Lng-B-T | 62   | chr6:124969250-124969350 |
| chr6 | 125082450 | 125082550 | 846-Lng-A-T  | 54   | chr6:125082450-125082550 |
| chr6 | 125656250 | 125656350 | 901-Lng-C-T  | 41   | chr6:125656250-125656350 |
| chr6 | 125859050 | 125859150 | 901-Lng-D-T  | 90   | chr6:125859050-125859150 |
| chr6 | 125859850 | 125859950 | 901-Lng-C-T  | 29   | chr6:125859850-125859950 |
| chr6 | 125964150 | 125964250 | 1223-Lng-C-T | 48   | chr6:125964150-125964250 |
| chr6 | 125972650 | 125972750 | 901-Lng-D-T  | 252  | chr6:125972650-125972750 |
| chr6 | 126516350 | 126516450 | 1065-Lng-B-T | 39   | chr6:126516350-126516450 |
| chr6 | 126704150 | 126704250 | 901-Lng-C-T  | 53   | chr6:126704150-126704250 |
| chr6 | 126851050 | 126851150 | 1065-Lng-C-T | 61   | chr6:126851050-126851150 |
| chr6 | 126983650 | 126983750 | 846-Lng-A-T  | 136  | chr6:126983650-126983750 |
| chr6 | 127012250 | 127012350 | 901-Lng-D-T  | 471  | chr6:127012250-127012350 |
| chr6 | 127415050 | 127415150 | 1065-Lng-A-T | 117  | chr6:127415050-127415150 |
| chr6 | 127441750 | 127441850 | 1065-Lng-A-T | 42   | chr6:127441750-127441850 |
| chr6 | 127550150 | 127550250 | 1065-Lng-B-T | 45   | chr6:127550150-127550250 |
| chr6 | 127600450 | 127600550 | 1223-Lng-C-T | 82   | chr6:127600450-127600550 |
| chr6 | 127710050 | 127710150 | 1151-Lng-A-T | 1095 | chr6:127710050-127710150 |
| chr6 | 127712250 | 127712350 | 1151-Lng-A-T | 398  | chr6:127712250-127712350 |
| chr6 | 127713250 | 127713350 | 1274-Lng-A-T | 77   | chr6:127713250-127713350 |
| chr6 | 127785850 | 127785950 | 1274-Lng-A-T | 111  | chr6:127785850-127785950 |
| chr6 | 127849350 | 127849450 | 1065-Lng-B-T | 68   | chr6:127849350-127849450 |
| chr6 | 127857450 | 127857550 | 1274-Lng-A-T | 61   | chr6:127857450-127857550 |
| chr6 | 127875050 | 127875150 | 1151-Lng-A-T | 552  | chr6:127875050-127875150 |
| chr6 | 127887550 | 127887650 | 1223-Lng-C-T | 54   | chr6:127887550-127887650 |
| chr6 | 127898450 | 127898550 | 1188-Lng-A-T | 984  | chr6:127898450-127898550 |
| chr6 | 127900850 | 127900950 | 1188-Lng-A-T | 42   | chr6:127900850-127900950 |
| chr6 | 127973650 | 127973750 | 1065-Lng-C-T | 104  | chr6:127973650-127973750 |
| chr6 | 128068750 | 128068850 | 1188-Lng-A-T | 229  | chr6:128068750-128068850 |
| chr6 | 128098650 | 128098750 | 1004-Lng-A-T | 78   | chr6:128098650-128098750 |
| chr6 | 128151450 | 128151550 | 1188-Lng-A-T | 198  | chr6:128151450-128151550 |

**Table S2: SB Insertion regions**

|      |           |           |              |      |                          |
|------|-----------|-----------|--------------|------|--------------------------|
| chr6 | 129002650 | 129002750 | 1072-Lng-A-T | 48   | chr6:129002650-129002750 |
| chr6 | 129163950 | 129164050 | 1004-Lng-A-T | 154  | chr6:129163950-129164050 |
| chr6 | 129191950 | 129192050 | 901-Lng-A-T  | 63   | chr6:129191950-129192050 |
| chr6 | 129230950 | 129231050 | 1065-Lng-A-T | 63   | chr6:129230950-129231050 |
| chr6 | 129386050 | 129386150 | 901-Lng-A-T  | 57   | chr6:129386050-129386150 |
| chr6 | 129511450 | 129511550 | 1004-Lng-A-T | 51   | chr6:129511450-129511550 |
| chr6 | 129778050 | 129778150 | 1072-Lng-A-T | 56   | chr6:129778050-129778150 |
| chr6 | 129905450 | 129905550 | 1090-Lng-A-T | 561  | chr6:129905450-129905550 |
| chr6 | 129984650 | 129984750 | 901-Lng-C-T  | 57   | chr6:129984650-129984750 |
| chr6 | 130198650 | 130198750 | 1223-Lng-A-T | 1111 | chr6:130198650-130198750 |
| chr6 | 130324250 | 130324350 | 1004-Lng-A-T | 61   | chr6:130324250-130324350 |
| chr6 | 130431950 | 130432050 | 1152-Lng-A-T | 101  | chr6:130431950-130432050 |
| chr6 | 130432350 | 130432450 | 901-Lng-C-T  | 55   | chr6:130432350-130432450 |
| chr6 | 130686050 | 130686150 | 1274-Lng-A-T | 83   | chr6:130686050-130686150 |
| chr6 | 130814850 | 130814950 | 1167-Lng-A-T | 118  | chr6:130814850-130814950 |
| chr6 | 131278650 | 131278750 | 1223-Lng-D-T | 48   | chr6:131278650-131278750 |
| chr6 | 131321050 | 131321150 | 1188-Lng-A-T | 209  | chr6:131321050-131321150 |
| chr6 | 131364150 | 131364250 | 1090-Lng-A-T | 101  | chr6:131364150-131364250 |
| chr6 | 131368950 | 131369050 | 1167-Lng-A-T | 175  | chr6:131368950-131369050 |
| chr6 | 132207750 | 132207850 | 1100-Lng-A-T | 61   | chr6:132207750-132207850 |
| chr6 | 132280050 | 132280150 | 1065-Lng-B-T | 63   | chr6:132280050-132280150 |
| chr6 | 132360450 | 132360550 | 1167-Lng-A-T | 78   | chr6:132360450-132360550 |
| chr6 | 132670450 | 132670550 | 1274-Lng-A-T | 56   | chr6:132670450-132670550 |
| chr6 | 132717850 | 132717950 | 1065-Lng-C-T | 63   | chr6:132717850-132717950 |
| chr6 | 132863150 | 132863250 | 901-Lng-C-T  | 83   | chr6:132863150-132863250 |
| chr6 | 132887550 | 132887650 | 1065-Lng-A-T | 36   | chr6:132887550-132887650 |
| chr6 | 132897950 | 132898050 | 1065-Lng-B-T | 75   | chr6:132897950-132898050 |
| chr6 | 133076150 | 133076250 | 1223-Lng-B-T | 86   | chr6:133076150-133076250 |
| chr6 | 133166750 | 133166850 | 846-Lng-A-T  | 99   | chr6:133166750-133166850 |
| chr6 | 133296550 | 133296650 | 1274-Lng-A-T | 55   | chr6:133296550-133296650 |
| chr6 | 133439150 | 133439250 | 1090-Lng-B-T | 139  | chr6:133439150-133439250 |
| chr6 | 133731750 | 133731850 | 1090-Lng-A-T | 94   | chr6:133731750-133731850 |
| chr6 | 134004250 | 134004350 | 1004-Lng-A-T | 76   | chr6:134004250-134004350 |
| chr6 | 134122150 | 134122250 | 1100-Lng-A-T | 97   | chr6:134122150-134122250 |
| chr6 | 134192450 | 134192550 | 1065-Lng-A-T | 74   | chr6:134192450-134192550 |
| chr6 | 134371550 | 134371650 | 846-Lng-A-T  | 192  | chr6:134371550-134371650 |
| chr6 | 134426050 | 134426150 | 901-Lng-A-T  | 143  | chr6:134426050-134426150 |
| chr6 | 134491650 | 134491750 | 1072-Lng-A-T | 63   | chr6:134491650-134491750 |
| chr6 | 134514550 | 134514650 | 901-Lng-D-T  | 163  | chr6:134514550-134514650 |
| chr6 | 134515550 | 134515650 | 1188-Lng-A-T | 145  | chr6:134515550-134515650 |
| chr6 | 134554850 | 134554950 | 1065-Lng-B-T | 58   | chr6:134554850-134554950 |
| chr6 | 134604350 | 134604450 | 1167-Lng-A-T | 91   | chr6:134604350-134604450 |
| chr6 | 134693950 | 134694050 | 901-Lng-C-T  | 44   | chr6:134693950-134694050 |
| chr6 | 134739750 | 134739850 | 1100-Lng-A-T | 86   | chr6:134739750-134739850 |
| chr6 | 134769550 | 134769650 | 1065-Lng-A-T | 49   | chr6:134769550-134769650 |
| chr6 | 134771250 | 134771350 | 1274-Lng-A-T | 55   | chr6:134771250-134771350 |

**Table S2: SB Insertion regions**

|      |           |           |              |     |                          |
|------|-----------|-----------|--------------|-----|--------------------------|
| chr6 | 134783050 | 134783150 | 1004-Lng-A-T | 705 | chr6:134783050-134783150 |
| chr6 | 134792050 | 134792150 | 1223-Lng-D-T | 188 | chr6:134792050-134792150 |
| chr6 | 134971150 | 134971250 | 1274-Lng-A-T | 90  | chr6:134971150-134971250 |
| chr6 | 135242450 | 135242550 | 1065-Lng-B-T | 96  | chr6:135242450-135242550 |
| chr6 | 135245150 | 135245250 | 1223-Lng-B-T | 35  | chr6:135245150-135245250 |
| chr6 | 135263250 | 135263350 | 1065-Lng-C-T | 74  | chr6:135263250-135263350 |
| chr6 | 135579750 | 135579850 | 1072-Lng-A-T | 136 | chr6:135579750-135579850 |
| chr6 | 135755150 | 135755250 | 1223-Lng-A-T | 100 | chr6:135755150-135755250 |
| chr6 | 136530650 | 136530750 | 1223-Lng-B-T | 36  | chr6:136530650-136530750 |
| chr6 | 136539650 | 136539750 | 1100-Lng-B-T | 264 | chr6:136539650-136539750 |
| chr6 | 136644250 | 136644350 | 1223-Lng-A-T | 303 | chr6:136644250-136644350 |
| chr6 | 136965250 | 136965350 | 1167-Lng-A-T | 69  | chr6:136965250-136965350 |
| chr6 | 137013950 | 137014050 | 901-Lng-B-T  | 239 | chr6:137013950-137014050 |
| chr6 | 137114650 | 137114750 | 901-Lng-B-T  | 68  | chr6:137114650-137114750 |
| chr6 | 137141450 | 137141550 | 1223-Lng-B-T | 40  | chr6:137141450-137141550 |
| chr6 | 137197350 | 137197450 | 1152-Lng-A-T | 34  | chr6:137197350-137197450 |
| chr6 | 137311450 | 137311550 | 1167-Lng-A-T | 75  | chr6:137311450-137311550 |
| chr6 | 137328450 | 137328550 | 901-Lng-A-T  | 418 | chr6:137328450-137328550 |
| chr6 | 137474950 | 137475050 | 1274-Lng-A-T | 51  | chr6:137474950-137475050 |
| chr6 | 137475650 | 137475750 | 1072-Lng-A-T | 164 | chr6:137475650-137475750 |
| chr6 | 137483950 | 137484050 | 1100-Lng-A-T | 90  | chr6:137483950-137484050 |
| chr6 | 137561550 | 137561650 | 1274-Lng-A-T | 78  | chr6:137561550-137561650 |
| chr6 | 137648050 | 137648150 | 901-Lng-B-T  | 390 | chr6:137648050-137648150 |
| chr6 | 138002550 | 138002650 | 1274-Lng-A-T | 59  | chr6:138002550-138002650 |
| chr6 | 138158550 | 138158650 | 1152-Lng-A-T | 173 | chr6:138158550-138158650 |
| chr6 | 138281950 | 138282050 | 1065-Lng-B-T | 91  | chr6:138281950-138282050 |
| chr6 | 138407350 | 138407450 | 1090-Lng-A-T | 76  | chr6:138407350-138407450 |
| chr6 | 138572950 | 138573050 | 1152-Lng-A-T | 83  | chr6:138572950-138573050 |
| chr6 | 138836550 | 138836650 | 846-Lng-A-T  | 64  | chr6:138836550-138836650 |
| chr6 | 138845450 | 138845550 | 1065-Lng-B-T | 63  | chr6:138845450-138845550 |
| chr6 | 138912150 | 138912250 | 901-Lng-B-T  | 44  | chr6:138912150-138912250 |
| chr6 | 139241350 | 139241450 | 1065-Lng-B-T | 95  | chr6:139241350-139241450 |
| chr6 | 139671750 | 139671850 | 901-Lng-A-T  | 96  | chr6:139671750-139671850 |
| chr6 | 139716250 | 139716350 | 1167-Lng-A-T | 67  | chr6:139716250-139716350 |
| chr6 | 139748950 | 139749050 | 1004-Lng-A-T | 69  | chr6:139748950-139749050 |
| chr6 | 139750950 | 139751050 | 1223-Lng-D-T | 76  | chr6:139750950-139751050 |
| chr6 | 139773950 | 139774050 | 901-Lng-A-T  | 103 | chr6:139773950-139774050 |
| chr6 | 140157350 | 140157450 | 1223-Lng-B-T | 91  | chr6:140157350-140157450 |
| chr6 | 140326450 | 140326550 | 1090-Lng-B-T | 402 | chr6:140326450-140326550 |
| chr6 | 140489750 | 140489850 | 1188-Lng-A-T | 227 | chr6:140489750-140489850 |
| chr6 | 140601550 | 140601650 | 1065-Lng-A-T | 371 | chr6:140601550-140601650 |
| chr6 | 140949750 | 140949850 | 901-Lng-B-T  | 73  | chr6:140949750-140949850 |
| chr6 | 141445650 | 141445750 | 1072-Lng-A-T | 53  | chr6:141445650-141445750 |
| chr6 | 141577650 | 141577750 | 1152-Lng-A-T | 141 | chr6:141577650-141577750 |
| chr6 | 141766150 | 141766250 | 1065-Lng-A-T | 55  | chr6:141766150-141766250 |
| chr6 | 142038150 | 142038250 | 1065-Lng-A-T | 52  | chr6:142038150-142038250 |

**Table S2: SB Insertion regions**

|      |           |           |              |      |                          |
|------|-----------|-----------|--------------|------|--------------------------|
| chr6 | 142047350 | 142047450 | 1223-Lng-B-T | 34   | chr6:142047350-142047450 |
| chr6 | 142182850 | 142182950 | 1223-Lng-B-T | 82   | chr6:142182850-142182950 |
| chr6 | 142324150 | 142324250 | 1223-Lng-B-T | 38   | chr6:142324150-142324250 |
| chr6 | 142357450 | 142357550 | 1223-Lng-B-T | 218  | chr6:142357450-142357550 |
| chr6 | 142510550 | 142510650 | 901-Lng-C-T  | 43   | chr6:142510550-142510650 |
| chr6 | 142591650 | 142591750 | 1065-Lng-B-T | 54   | chr6:142591650-142591750 |
| chr6 | 142710650 | 142710750 | 1152-Lng-A-T | 51   | chr6:142710650-142710750 |
| chr6 | 142955850 | 142955950 | 1090-Lng-A-T | 90   | chr6:142955850-142955950 |
| chr6 | 143027550 | 143027650 | 846-Lng-A-T  | 53   | chr6:143027550-143027650 |
| chr6 | 143092150 | 143092250 | 901-Lng-A-T  | 290  | chr6:143092150-143092250 |
| chr6 | 143117250 | 143117350 | 1223-Lng-B-T | 110  | chr6:143117250-143117350 |
| chr6 | 143117950 | 143118050 | 1188-Lng-A-T | 1450 | chr6:143117950-143118050 |
| chr6 | 143118550 | 143118650 | 1151-Lng-A-T | 54   | chr6:143118550-143118650 |
| chr6 | 143151150 | 143151250 | 1065-Lng-B-T | 46   | chr6:143151150-143151250 |
| chr6 | 143376650 | 143376750 | 1152-Lng-A-T | 36   | chr6:143376650-143376750 |
| chr6 | 143386750 | 143386850 | 1072-Lng-A-T | 150  | chr6:143386750-143386850 |
| chr6 | 143569650 | 143569750 | 1090-Lng-A-T | 250  | chr6:143569650-143569750 |
| chr6 | 143973150 | 143973250 | 1004-Lng-A-T | 67   | chr6:143973150-143973250 |
| chr6 | 144019950 | 144020050 | 1223-Lng-C-T | 43   | chr6:144019950-144020050 |
| chr6 | 144038650 | 144038750 | 1065-Lng-A-T | 72   | chr6:144038650-144038750 |
| chr6 | 144181650 | 144181750 | 846-Lng-A-T  | 75   | chr6:144181650-144181750 |
| chr6 | 144245450 | 144245550 | 1065-Lng-B-T | 207  | chr6:144245450-144245550 |
| chr6 | 144301750 | 144301850 | 1223-Lng-C-T | 72   | chr6:144301750-144301850 |
| chr6 | 144556550 | 144556650 | 901-Lng-D-T  | 276  | chr6:144556550-144556650 |
| chr6 | 144623050 | 144623150 | 1065-Lng-C-T | 74   | chr6:144623050-144623150 |
| chr6 | 144648050 | 144648150 | 1065-Lng-B-T | 50   | chr6:144648050-144648150 |
| chr6 | 144757050 | 144757150 | 1004-Lng-A-T | 56   | chr6:144757050-144757150 |
| chr6 | 144964750 | 144964850 | 1100-Lng-A-T | 59   | chr6:144964750-144964850 |
| chr6 | 145029250 | 145029350 | 1151-Lng-A-T | 55   | chr6:145029250-145029350 |
| chr6 | 145172550 | 145172650 | 1065-Lng-B-T | 225  | chr6:145172550-145172650 |
| chr6 | 145189450 | 145189550 | 1152-Lng-A-T | 267  | chr6:145189450-145189550 |
| chr6 | 145191650 | 145191750 | 1100-Lng-A-T | 233  | chr6:145191650-145191750 |
| chr6 | 145203650 | 145203750 | 1065-Lng-B-T | 45   | chr6:145203650-145203750 |
| chr6 | 145327150 | 145327250 | 1223-Lng-A-T | 417  | chr6:145327150-145327250 |
| chr6 | 145743050 | 145743150 | 1223-Lng-D-T | 40   | chr6:145743050-145743150 |
| chr6 | 145766150 | 145766250 | 901-Lng-C-T  | 271  | chr6:145766150-145766250 |
| chr6 | 145810350 | 145810450 | 1274-Lng-A-T | 226  | chr6:145810350-145810450 |
| chr6 | 145830050 | 145830150 | 1151-Lng-A-T | 181  | chr6:145830050-145830150 |
| chr6 | 145855750 | 145855850 | 1223-Lng-B-T | 44   | chr6:145855750-145855850 |
| chr6 | 146023150 | 146023250 | 1188-Lng-A-T | 95   | chr6:146023150-146023250 |
| chr6 | 146040050 | 146040150 | 901-Lng-B-T  | 244  | chr6:146040050-146040150 |
| chr6 | 146158550 | 146158650 | 901-Lng-A-T  | 339  | chr6:146158550-146158650 |
| chr6 | 146168950 | 146169050 | 1100-Lng-B-T | 54   | chr6:146168950-146169050 |
| chr6 | 146190650 | 146190750 | 901-Lng-D-T  | 73   | chr6:146190650-146190750 |
| chr6 | 146355650 | 146355750 | 1065-Lng-A-T | 94   | chr6:146355650-146355750 |
| chr6 | 146363850 | 146363950 | 1072-Lng-A-T | 79   | chr6:146363850-146363950 |

**Table S2: SB Insertion regions**

|      |           |           |              |     |                          |
|------|-----------|-----------|--------------|-----|--------------------------|
| chr6 | 146402650 | 146402750 | 1065-Lng-A-T | 83  | chr6:146402650-146402750 |
| chr6 | 146429150 | 146429250 | 1167-Lng-A-T | 96  | chr6:146429150-146429250 |
| chr6 | 146531150 | 146531250 | 1100-Lng-A-T | 57  | chr6:146531150-146531250 |
| chr6 | 146697950 | 146698050 | 1274-Lng-A-T | 54  | chr6:146697950-146698050 |
| chr6 | 146712650 | 146712750 | 1090-Lng-A-T | 150 | chr6:146712650-146712750 |
| chr6 | 146745750 | 146745850 | 1065-Lng-B-T | 116 | chr6:146745750-146745850 |
| chr6 | 146850250 | 146850350 | 1274-Lng-A-T | 63  | chr6:146850250-146850350 |
| chr6 | 146857550 | 146857650 | 1274-Lng-A-T | 62  | chr6:146857550-146857650 |
| chr6 | 146859250 | 146859350 | 1223-Lng-C-T | 131 | chr6:146859250-146859350 |
| chr6 | 146902350 | 146902450 | 1188-Lng-A-T | 188 | chr6:146902350-146902450 |
| chr6 | 146928450 | 146928550 | 1274-Lng-A-T | 84  | chr6:146928450-146928550 |
| chr6 | 146962850 | 146962950 | 1274-Lng-A-T | 51  | chr6:146962850-146962950 |
| chr6 | 146965050 | 146965150 | 1072-Lng-A-T | 90  | chr6:146965050-146965150 |
| chr6 | 147048950 | 147049050 | 901-Lng-D-T  | 56  | chr6:147048950-147049050 |
| chr6 | 147289850 | 147289950 | 1100-Lng-A-T | 55  | chr6:147289850-147289950 |
| chr6 | 147318250 | 147318350 | 1065-Lng-C-T | 75  | chr6:147318250-147318350 |
| chr6 | 147461350 | 147461450 | 1072-Lng-A-T | 54  | chr6:147461350-147461450 |
| chr6 | 147525750 | 147525850 | 901-Lng-D-T  | 315 | chr6:147525750-147525850 |
| chr6 | 147546050 | 147546150 | 1090-Lng-A-T | 228 | chr6:147546050-147546150 |
| chr6 | 147546650 | 147546750 | 901-Lng-C-T  | 319 | chr6:147546650-147546750 |
| chr6 | 147654750 | 147654850 | 1223-Lng-B-T | 82  | chr6:147654750-147654850 |
| chr6 | 147869150 | 147869250 | 1090-Lng-A-T | 103 | chr6:147869150-147869250 |
| chr6 | 148135850 | 148135950 | 1072-Lng-A-T | 126 | chr6:148135850-148135950 |
| chr6 | 148148050 | 148148150 | 1188-Lng-A-T | 35  | chr6:148148050-148148150 |
| chr6 | 148168250 | 148168350 | 1167-Lng-A-T | 61  | chr6:148168250-148168350 |
| chr6 | 148297750 | 148297850 | 1072-Lng-A-T | 137 | chr6:148297750-148297850 |
| chr6 | 148768250 | 148768350 | 1223-Lng-D-T | 44  | chr6:148768250-148768350 |
| chr6 | 148768350 | 148768450 | 1223-Lng-D-T | 54  | chr6:148768350-148768450 |
| chr6 | 148810250 | 148810350 | 1274-Lng-A-T | 54  | chr6:148810250-148810350 |
| chr6 | 148874950 | 148875050 | 1090-Lng-B-T | 726 | chr6:148874950-148875050 |
| chr6 | 149104050 | 149104150 | 1004-Lng-A-T | 54  | chr6:149104050-149104150 |
| chr6 | 149133950 | 149134050 | 1072-Lng-A-T | 55  | chr6:149133950-149134050 |
| chr6 | 149190050 | 149190150 | 1004-Lng-A-T | 58  | chr6:149190050-149190150 |
| chr6 | 149280550 | 149280650 | 846-Lng-A-T  | 66  | chr6:149280550-149280650 |
| chr6 | 149285250 | 149285350 | 901-Lng-A-T  | 104 | chr6:149285250-149285350 |
| chr6 | 149389050 | 149389150 | 1188-Lng-A-T | 192 | chr6:149389050-149389150 |
| chr6 | 149389650 | 149389750 | 1090-Lng-B-T | 346 | chr6:149389650-149389750 |
| chr6 | 149397350 | 149397450 | 1274-Lng-A-T | 179 | chr6:149397350-149397450 |
| chr6 | 149514850 | 149514950 | 1274-Lng-A-T | 85  | chr6:149514850-149514950 |
| chr7 | 3228750   | 3228850   | 1223-Lng-B-T | 165 | chr7:3228750-3228850     |
| chr7 | 3266750   | 3266850   | 1072-Lng-A-T | 54  | chr7:3266750-3266850     |
| chr7 | 3531050   | 3531150   | 1090-Lng-A-T | 45  | chr7:3531050-3531150     |
| chr7 | 3590150   | 3590250   | 1223-Lng-B-T | 41  | chr7:3590150-3590250     |
| chr7 | 3606250   | 3606350   | 901-Lng-A-T  | 91  | chr7:3606250-3606350     |
| chr7 | 3920750   | 3920850   | 1274-Lng-A-T | 83  | chr7:3920750-3920850     |
| chr7 | 4091550   | 4091650   | 1004-Lng-A-T | 54  | chr7:4091550-4091650     |

**Table S2: SB Insertion regions**

|      |          |          |              |       |                        |
|------|----------|----------|--------------|-------|------------------------|
| chr7 | 4112050  | 4112150  | 901-Lng-D-T  | 262   | chr7:4112050-4112150   |
| chr7 | 4364450  | 4364550  | 1065-Lng-B-T | 81    | chr7:4364450-4364550   |
| chr7 | 4382450  | 4382550  | 1188-Lng-A-T | 69    | chr7:4382450-4382550   |
| chr7 | 4422550  | 4422650  | 1100-Lng-A-T | 69    | chr7:4422550-4422650   |
| chr7 | 4569950  | 4570050  | 1223-Lng-C-T | 46    | chr7:4569950-4570050   |
| chr7 | 4582450  | 4582550  | 1072-Lng-A-T | 57    | chr7:4582450-4582550   |
| chr7 | 4587350  | 4587450  | 901-Lng-B-T  | 165   | chr7:4587350-4587450   |
| chr7 | 4588350  | 4588450  | 1090-Lng-A-T | 110   | chr7:4588350-4588450   |
| chr7 | 4608550  | 4608650  | 1188-Lng-A-T | 87    | chr7:4608550-4608650   |
| chr7 | 4925950  | 4926050  | 1004-Lng-A-T | 10214 | chr7:4925950-4926050   |
| chr7 | 4979350  | 4979450  | 1090-Lng-A-T | 424   | chr7:4979350-4979450   |
| chr7 | 4983050  | 4983150  | 1274-Lng-A-T | 49    | chr7:4983050-4983150   |
| chr7 | 4985650  | 4985750  | 846-Lng-A-T  | 80    | chr7:4985650-4985750   |
| chr7 | 5056850  | 5056950  | 901-Lng-A-T  | 74    | chr7:5056850-5056950   |
| chr7 | 5064450  | 5064550  | 1065-Lng-C-T | 69    | chr7:5064450-5064550   |
| chr7 | 5213750  | 5213850  | 1065-Lng-A-T | 50    | chr7:5213750-5213850   |
| chr7 | 5250950  | 5251050  | 1152-Lng-A-T | 65    | chr7:5250950-5251050   |
| chr7 | 5410450  | 5410550  | 1274-Lng-A-T | 58    | chr7:5410450-5410550   |
| chr7 | 5413650  | 5413750  | 1274-Lng-A-T | 66    | chr7:5413650-5413750   |
| chr7 | 5436250  | 5436350  | 1152-Lng-A-T | 148   | chr7:5436250-5436350   |
| chr7 | 5776850  | 5776950  | 901-Lng-B-T  | 107   | chr7:5776850-5776950   |
| chr7 | 6120450  | 6120550  | 846-Lng-A-T  | 105   | chr7:6120450-6120550   |
| chr7 | 6400550  | 6400650  | 1004-Lng-A-T | 151   | chr7:6400550-6400650   |
| chr7 | 6442250  | 6442350  | 1072-Lng-A-T | 60    | chr7:6442250-6442350   |
| chr7 | 6530850  | 6530950  | 1223-Lng-B-T | 76    | chr7:6530850-6530950   |
| chr7 | 6643750  | 6643850  | 1090-Lng-B-T | 625   | chr7:6643750-6643850   |
| chr7 | 6741650  | 6741750  | 1065-Lng-B-T | 75    | chr7:6741650-6741750   |
| chr7 | 7241250  | 7241350  | 1223-Lng-C-T | 50    | chr7:7241250-7241350   |
| chr7 | 7523050  | 7523150  | 1152-Lng-A-T | 36    | chr7:7523050-7523150   |
| chr7 | 9645650  | 9645750  | 1152-Lng-A-T | 113   | chr7:9645650-9645750   |
| chr7 | 10718150 | 10718250 | 1065-Lng-B-T | 65    | chr7:10718150-10718250 |
| chr7 | 10796250 | 10796350 | 1004-Lng-A-T | 53    | chr7:10796250-10796350 |
| chr7 | 10868350 | 10868450 | 846-Lng-A-T  | 174   | chr7:10868350-10868450 |
| chr7 | 11038350 | 11038450 | 901-Lng-A-T  | 134   | chr7:11038350-11038450 |
| chr7 | 11069550 | 11069650 | 1223-Lng-C-T | 56    | chr7:11069550-11069650 |
| chr7 | 11120750 | 11120850 | 1004-Lng-A-T | 76    | chr7:11120750-11120850 |
| chr7 | 11224550 | 11224650 | 1065-Lng-B-T | 350   | chr7:11224550-11224650 |
| chr7 | 11272250 | 11272350 | 901-Lng-C-T  | 53    | chr7:11272250-11272350 |
| chr7 | 11293450 | 11293550 | 1152-Lng-A-T | 81    | chr7:11293450-11293550 |
| chr7 | 11397850 | 11397950 | 1065-Lng-B-T | 82    | chr7:11397850-11397950 |
| chr7 | 12254550 | 12254650 | 1004-Lng-A-T | 56    | chr7:12254550-12254650 |
| chr7 | 12506150 | 12506250 | 1072-Lng-A-T | 82    | chr7:12506150-12506250 |
| chr7 | 12685450 | 12685550 | 1004-Lng-A-T | 114   | chr7:12685450-12685550 |
| chr7 | 12904350 | 12904450 | 1065-Lng-B-T | 522   | chr7:12904350-12904450 |
| chr7 | 12974650 | 12974750 | 1065-Lng-A-T | 87    | chr7:12974650-12974750 |
| chr7 | 13254750 | 13254850 | 1065-Lng-B-T | 43    | chr7:13254750-13254850 |



**Table S2: SB Insertion regions**

|      |          |          |              |     |                        |
|------|----------|----------|--------------|-----|------------------------|
| chr7 | 13849650 | 13849750 | 1004-Lng-A-T | 260 | chr7:13849650-13849750 |
| chr7 | 13944250 | 13944350 | 1223-Lng-C-T | 61  | chr7:13944250-13944350 |
| chr7 | 13973250 | 13973350 | 1223-Lng-B-T | 41  | chr7:13973250-13973350 |
| chr7 | 13988250 | 13988350 | 1100-Lng-B-T | 59  | chr7:13988250-13988350 |
| chr7 | 14020350 | 14020450 | 1004-Lng-A-T | 49  | chr7:14020350-14020450 |
| chr7 | 14191150 | 14191250 | 901-Lng-C-T  | 89  | chr7:14191150-14191250 |
| chr7 | 14301450 | 14301550 | 901-Lng-A-T  | 53  | chr7:14301450-14301550 |
| chr7 | 14590250 | 14590350 | 1223-Lng-A-T | 239 | chr7:14590250-14590350 |
| chr7 | 14714650 | 14714750 | 901-Lng-A-T  | 525 | chr7:14714650-14714750 |
| chr7 | 14831750 | 14831850 | 901-Lng-B-T  | 92  | chr7:14831750-14831850 |
| chr7 | 14894150 | 14894250 | 1004-Lng-A-T | 127 | chr7:14894150-14894250 |
| chr7 | 15033150 | 15033250 | 1223-Lng-B-T | 36  | chr7:15033150-15033250 |
| chr7 | 15174750 | 15174850 | 1065-Lng-C-T | 66  | chr7:15174750-15174850 |
| chr7 | 15679750 | 15679850 | 1065-Lng-B-T | 68  | chr7:15679750-15679850 |
| chr7 | 16590350 | 16590450 | 1188-Lng-A-T | 132 | chr7:16590350-16590450 |
| chr7 | 16720250 | 16720350 | 1065-Lng-A-T | 56  | chr7:16720250-16720350 |
| chr7 | 16894150 | 16894250 | 1065-Lng-B-T | 393 | chr7:16894150-16894250 |
| chr7 | 16931350 | 16931450 | 1188-Lng-A-T | 74  | chr7:16931350-16931450 |
| chr7 | 17078950 | 17079050 | 1188-Lng-A-T | 193 | chr7:17078950-17079050 |
| chr7 | 17159550 | 17159650 | 1100-Lng-A-T | 103 | chr7:17159550-17159650 |
| chr7 | 17179050 | 17179150 | 901-Lng-A-T  | 83  | chr7:17179050-17179150 |
| chr7 | 17182750 | 17182850 | 1100-Lng-A-T | 87  | chr7:17182750-17182850 |
| chr7 | 17193250 | 17193350 | 1223-Lng-C-T | 47  | chr7:17193250-17193350 |
| chr7 | 17264350 | 17264450 | 901-Lng-C-T  | 33  | chr7:17264350-17264450 |
| chr7 | 17349950 | 17350050 | 846-Lng-A-T  | 194 | chr7:17349950-17350050 |
| chr7 | 17402750 | 17402850 | 1065-Lng-A-T | 38  | chr7:17402750-17402850 |
| chr7 | 17839550 | 17839650 | 1065-Lng-C-T | 66  | chr7:17839550-17839650 |
| chr7 | 18014550 | 18014650 | 1004-Lng-A-T | 77  | chr7:18014550-18014650 |
| chr7 | 18048950 | 18049050 | 1065-Lng-B-T | 69  | chr7:18048950-18049050 |
| chr7 | 18467150 | 18467250 | 1065-Lng-A-T | 84  | chr7:18467150-18467250 |
| chr7 | 18525250 | 18525350 | 1223-Lng-C-T | 46  | chr7:18525250-18525350 |
| chr7 | 18587150 | 18587250 | 1152-Lng-A-T | 79  | chr7:18587150-18587250 |
| chr7 | 18856050 | 18856150 | 1004-Lng-A-T | 85  | chr7:18856050-18856150 |
| chr7 | 18858650 | 18858750 | 1065-Lng-B-T | 47  | chr7:18858650-18858750 |
| chr7 | 18951950 | 18952050 | 901-Lng-B-T  | 76  | chr7:18951950-18952050 |
| chr7 | 19057250 | 19057350 | 1223-Lng-C-T | 51  | chr7:19057250-19057350 |
| chr7 | 19600950 | 19601050 | 1223-Lng-D-T | 57  | chr7:19600950-19601050 |
| chr7 | 19620650 | 19620750 | 1004-Lng-A-T | 79  | chr7:19620650-19620750 |
| chr7 | 19738950 | 19739050 | 901-Lng-D-T  | 404 | chr7:19738950-19739050 |
| chr7 | 19996550 | 19996650 | 1065-Lng-C-T | 74  | chr7:19996550-19996650 |
| chr7 | 20218350 | 20218450 | 1223-Lng-D-T | 54  | chr7:20218350-20218450 |
| chr7 | 20241750 | 20241850 | 1065-Lng-B-T | 39  | chr7:20241750-20241850 |
| chr7 | 20243250 | 20243350 | 1072-Lng-A-T | 76  | chr7:20243250-20243350 |
| chr7 | 20288050 | 20288150 | 1072-Lng-A-T | 76  | chr7:20288050-20288150 |
| chr7 | 20317450 | 20317550 | 1223-Lng-A-T | 96  | chr7:20317450-20317550 |
| chr7 | 20345950 | 20346050 | 1004-Lng-A-T | 102 | chr7:20345950-20346050 |

**Table S2: SB Insertion regions**

|      |          |          |              |     |                        |
|------|----------|----------|--------------|-----|------------------------|
| chr7 | 20505250 | 20505350 | 1223-Lng-B-T | 257 | chr7:20505250-20505350 |
| chr7 | 20507850 | 20507950 | 1065-Lng-B-T | 59  | chr7:20507850-20507950 |
| chr7 | 20567250 | 20567350 | 901-Lng-B-T  | 177 | chr7:20567250-20567350 |
| chr7 | 21874450 | 21874550 | 901-Lng-D-T  | 97  | chr7:21874450-21874550 |
| chr7 | 22993850 | 22993950 | 1151-Lng-A-T | 297 | chr7:22993850-22993950 |
| chr7 | 24103350 | 24103450 | 901-Lng-B-T  | 146 | chr7:24103350-24103450 |
| chr7 | 24232050 | 24232150 | 1065-Lng-B-T | 50  | chr7:24232050-24232150 |
| chr7 | 24571150 | 24571250 | 1004-Lng-A-T | 129 | chr7:24571150-24571250 |
| chr7 | 24888950 | 24889050 | 1152-Lng-A-T | 91  | chr7:24888950-24889050 |
| chr7 | 25042450 | 25042550 | 1072-Lng-A-T | 124 | chr7:25042450-25042550 |
| chr7 | 25278350 | 25278450 | 1223-Lng-A-T | 138 | chr7:25278350-25278450 |
| chr7 | 25373850 | 25373950 | 901-Lng-C-T  | 99  | chr7:25373850-25373950 |
| chr7 | 25643950 | 25644050 | 1072-Lng-A-T | 62  | chr7:25643950-25644050 |
| chr7 | 25695350 | 25695450 | 1152-Lng-A-T | 75  | chr7:25695350-25695450 |
| chr7 | 26015150 | 26015250 | 1065-Lng-B-T | 64  | chr7:26015150-26015250 |
| chr7 | 26049950 | 26050050 | 901-Lng-D-T  | 635 | chr7:26049950-26050050 |
| chr7 | 26177250 | 26177350 | 1167-Lng-A-T | 46  | chr7:26177250-26177350 |
| chr7 | 26223450 | 26223550 | 1223-Lng-C-T | 57  | chr7:26223450-26223550 |
| chr7 | 26438050 | 26438150 | 1223-Lng-D-T | 166 | chr7:26438050-26438150 |
| chr7 | 26477050 | 26477150 | 901-Lng-C-T  | 58  | chr7:26477050-26477150 |
| chr7 | 26484850 | 26484950 | 1004-Lng-A-T | 49  | chr7:26484850-26484950 |
| chr7 | 26516350 | 26516450 | 901-Lng-C-T  | 31  | chr7:26516350-26516450 |
| chr7 | 26522150 | 26522250 | 1223-Lng-C-T | 43  | chr7:26522150-26522250 |
| chr7 | 26536950 | 26537050 | 1188-Lng-A-T | 53  | chr7:26536950-26537050 |
| chr7 | 26674550 | 26674650 | 1223-Lng-B-T | 48  | chr7:26674550-26674650 |
| chr7 | 26938750 | 26938850 | 1223-Lng-D-T | 42  | chr7:26938750-26938850 |
| chr7 | 27217950 | 27218050 | 1274-Lng-A-T | 68  | chr7:27217950-27218050 |
| chr7 | 27301050 | 27301150 | 1188-Lng-A-T | 37  | chr7:27301050-27301150 |
| chr7 | 27369050 | 27369150 | 1274-Lng-A-T | 81  | chr7:27369050-27369150 |
| chr7 | 27412550 | 27412650 | 1065-Lng-A-T | 51  | chr7:27412550-27412650 |
| chr7 | 27476550 | 27476650 | 1004-Lng-A-T | 81  | chr7:27476550-27476650 |
| chr7 | 27716550 | 27716650 | 1004-Lng-A-T | 147 | chr7:27716550-27716650 |
| chr7 | 27885950 | 27886050 | 846-Lng-A-T  | 58  | chr7:27885950-27886050 |
| chr7 | 27996650 | 27996750 | 901-Lng-C-T  | 52  | chr7:27996650-27996750 |
| chr7 | 28023350 | 28023450 | 1167-Lng-A-T | 536 | chr7:28023350-28023450 |
| chr7 | 28105550 | 28105650 | 1223-Lng-C-T | 43  | chr7:28105550-28105650 |
| chr7 | 28230250 | 28230350 | 1065-Lng-A-T | 53  | chr7:28230250-28230350 |
| chr7 | 28333750 | 28333850 | 1223-Lng-A-T | 63  | chr7:28333750-28333850 |
| chr7 | 28354050 | 28354150 | 1167-Lng-A-T | 120 | chr7:28354050-28354150 |
| chr7 | 28604550 | 28604650 | 1223-Lng-B-T | 38  | chr7:28604550-28604650 |
| chr7 | 28624250 | 28624350 | 901-Lng-A-T  | 290 | chr7:28624250-28624350 |
| chr7 | 28662150 | 28662250 | 1072-Lng-A-T | 146 | chr7:28662150-28662250 |
| chr7 | 28973150 | 28973250 | 1167-Lng-A-T | 101 | chr7:28973150-28973250 |
| chr7 | 29058750 | 29058850 | 1065-Lng-B-T | 52  | chr7:29058750-29058850 |
| chr7 | 29102050 | 29102150 | 1151-Lng-A-T | 159 | chr7:29102050-29102150 |
| chr7 | 29117250 | 29117350 | 901-Lng-A-T  | 69  | chr7:29117250-29117350 |

**Table S2: SB Insertion regions**

|      |          |          |              |      |                        |
|------|----------|----------|--------------|------|------------------------|
| chr7 | 29215050 | 29215150 | 1188-Lng-A-T | 35   | chr7:29215050-29215150 |
| chr7 | 29217550 | 29217650 | 1065-Lng-B-T | 52   | chr7:29217550-29217650 |
| chr7 | 29629150 | 29629250 | 1223-Lng-D-T | 56   | chr7:29629150-29629250 |
| chr7 | 30056050 | 30056150 | 901-Lng-B-T  | 179  | chr7:30056050-30056150 |
| chr7 | 30112050 | 30112150 | 1065-Lng-B-T | 79   | chr7:30112050-30112150 |
| chr7 | 30215050 | 30215150 | 901-Lng-A-T  | 60   | chr7:30215050-30215150 |
| chr7 | 30458750 | 30458850 | 901-Lng-B-T  | 182  | chr7:30458750-30458850 |
| chr7 | 30513450 | 30513550 | 1152-Lng-A-T | 122  | chr7:30513450-30513550 |
| chr7 | 30553950 | 30554050 | 901-Lng-D-T  | 90   | chr7:30553950-30554050 |
| chr7 | 30609450 | 30609550 | 901-Lng-B-T  | 88   | chr7:30609450-30609550 |
| chr7 | 30791150 | 30791250 | 1223-Lng-C-T | 88   | chr7:30791150-30791250 |
| chr7 | 31589350 | 31589450 | 1065-Lng-A-T | 98   | chr7:31589350-31589450 |
| chr7 | 31729950 | 31730050 | 1188-Lng-A-T | 87   | chr7:31729950-31730050 |
| chr7 | 31754250 | 31754350 | 1274-Lng-A-T | 184  | chr7:31754250-31754350 |
| chr7 | 31756650 | 31756750 | 1274-Lng-A-T | 51   | chr7:31756650-31756750 |
| chr7 | 31757350 | 31757450 | 901-Lng-C-T  | 50   | chr7:31757350-31757450 |
| chr7 | 31782650 | 31782750 | 901-Lng-D-T  | 434  | chr7:31782650-31782750 |
| chr7 | 32318650 | 32318750 | 901-Lng-B-T  | 139  | chr7:32318650-32318750 |
| chr7 | 32413250 | 32413350 | 1065-Lng-C-T | 84   | chr7:32413250-32413350 |
| chr7 | 32422950 | 32423050 | 901-Lng-A-T  | 56   | chr7:32422950-32423050 |
| chr7 | 32715550 | 32715650 | 1065-Lng-B-T | 45   | chr7:32715550-32715650 |
| chr7 | 33124950 | 33125050 | 901-Lng-C-T  | 28   | chr7:33124950-33125050 |
| chr7 | 34164050 | 34164150 | 846-Lng-A-T  | 158  | chr7:34164050-34164150 |
| chr7 | 34232250 | 34232350 | 1072-Lng-A-T | 52   | chr7:34232250-34232350 |
| chr7 | 34250450 | 34250550 | 1223-Lng-A-T | 1009 | chr7:34250450-34250550 |
| chr7 | 34456850 | 34456950 | 901-Lng-B-T  | 51   | chr7:34456850-34456950 |
| chr7 | 34705050 | 34705150 | 901-Lng-C-T  | 244  | chr7:34705050-34705150 |
| chr7 | 34722250 | 34722350 | 1004-Lng-A-T | 112  | chr7:34722250-34722350 |
| chr7 | 34825650 | 34825750 | 1072-Lng-A-T | 123  | chr7:34825650-34825750 |
| chr7 | 34899550 | 34899650 | 901-Lng-A-T  | 59   | chr7:34899550-34899650 |
| chr7 | 34933050 | 34933150 | 1004-Lng-A-T | 71   | chr7:34933050-34933150 |
| chr7 | 34937250 | 34937350 | 1223-Lng-C-T | 48   | chr7:34937250-34937350 |
| chr7 | 34948750 | 34948850 | 1090-Lng-A-T | 65   | chr7:34948750-34948850 |
| chr7 | 35008250 | 35008350 | 1004-Lng-A-T | 86   | chr7:35008250-35008350 |
| chr7 | 35090250 | 35090350 | 1274-Lng-A-T | 199  | chr7:35090250-35090350 |
| chr7 | 35145150 | 35145250 | 1188-Lng-A-T | 174  | chr7:35145150-35145250 |
| chr7 | 35299850 | 35299950 | 1065-Lng-B-T | 51   | chr7:35299850-35299950 |
| chr7 | 35464450 | 35464550 | 1072-Lng-A-T | 50   | chr7:35464450-35464550 |
| chr7 | 35489850 | 35489950 | 1152-Lng-A-T | 49   | chr7:35489850-35489950 |
| chr7 | 35496150 | 35496250 | 1065-Lng-A-T | 43   | chr7:35496150-35496250 |
| chr7 | 35530950 | 35531050 | 901-Lng-B-T  | 77   | chr7:35530950-35531050 |
| chr7 | 35551550 | 35551650 | 1100-Lng-B-T | 58   | chr7:35551550-35551650 |
| chr7 | 35795150 | 35795250 | 1090-Lng-A-T | 54   | chr7:35795150-35795250 |
| chr7 | 35824750 | 35824850 | 901-Lng-C-T  | 31   | chr7:35824750-35824850 |
| chr7 | 35833250 | 35833350 | 1274-Lng-A-T | 111  | chr7:35833250-35833350 |
| chr7 | 35842750 | 35842850 | 901-Lng-C-T  | 29   | chr7:35842750-35842850 |

**Table S2: SB Insertion regions**

|      |          |          |              |      |                        |
|------|----------|----------|--------------|------|------------------------|
| chr7 | 35846750 | 35846850 | 901-Lng-A-T  | 61   | chr7:35846750-35846850 |
| chr7 | 36046250 | 36046350 | 1090-Lng-B-T | 433  | chr7:36046250-36046350 |
| chr7 | 36379750 | 36379850 | 1188-Lng-A-T | 35   | chr7:36379750-36379850 |
| chr7 | 36581650 | 36581750 | 1072-Lng-A-T | 50   | chr7:36581650-36581750 |
| chr7 | 36659150 | 36659250 | 901-Lng-A-T  | 87   | chr7:36659150-36659250 |
| chr7 | 36833750 | 36833850 | 1072-Lng-A-T | 49   | chr7:36833750-36833850 |
| chr7 | 37071450 | 37071550 | 901-Lng-D-T  | 300  | chr7:37071450-37071550 |
| chr7 | 37081250 | 37081350 | 1004-Lng-A-T | 49   | chr7:37081250-37081350 |
| chr7 | 37812850 | 37812950 | 1065-Lng-A-T | 73   | chr7:37812850-37812950 |
| chr7 | 37818250 | 37818350 | 1223-Lng-A-T | 270  | chr7:37818250-37818350 |
| chr7 | 38627750 | 38627850 | 1090-Lng-A-T | 50   | chr7:38627750-38627850 |
| chr7 | 38735650 | 38735750 | 1223-Lng-C-T | 4130 | chr7:38735650-38735750 |
| chr7 | 38746150 | 38746250 | 1072-Lng-A-T | 55   | chr7:38746150-38746250 |
| chr7 | 38777550 | 38777650 | 901-Lng-D-T  | 659  | chr7:38777550-38777650 |
| chr7 | 38789950 | 38790050 | 1072-Lng-A-T | 60   | chr7:38789950-38790050 |
| chr7 | 38966950 | 38967050 | 1223-Lng-D-T | 214  | chr7:38966950-38967050 |
| chr7 | 39076750 | 39076850 | 1152-Lng-A-T | 99   | chr7:39076750-39076850 |
| chr7 | 39104950 | 39105050 | 901-Lng-B-T  | 71   | chr7:39104950-39105050 |
| chr7 | 46660150 | 46660250 | 1065-Lng-A-T | 60   | chr7:46660150-46660250 |
| chr7 | 47072850 | 47072950 | 1223-Lng-D-T | 49   | chr7:47072850-47072950 |
| chr7 | 47174550 | 47174650 | 901-Lng-B-T  | 418  | chr7:47174550-47174650 |
| chr7 | 47206550 | 47206650 | 846-Lng-A-T  | 46   | chr7:47206550-47206650 |
| chr7 | 47416250 | 47416350 | 1065-Lng-B-T | 66   | chr7:47416250-47416350 |
| chr7 | 47448450 | 47448550 | 1090-Lng-A-T | 73   | chr7:47448450-47448550 |
| chr7 | 47588150 | 47588250 | 1072-Lng-A-T | 186  | chr7:47588150-47588250 |
| chr7 | 47696850 | 47696950 | 1065-Lng-B-T | 40   | chr7:47696850-47696950 |
| chr7 | 47737150 | 47737250 | 1065-Lng-C-T | 86   | chr7:47737150-47737250 |
| chr7 | 47885950 | 47886050 | 1274-Lng-A-T | 200  | chr7:47885950-47886050 |
| chr7 | 48232550 | 48232650 | 1004-Lng-A-T | 51   | chr7:48232550-48232650 |
| chr7 | 48480950 | 48481050 | 1004-Lng-A-T | 89   | chr7:48480950-48481050 |
| chr7 | 48799350 | 48799450 | 1004-Lng-A-T | 83   | chr7:48799350-48799450 |
| chr7 | 48838650 | 48838750 | 1100-Lng-A-T | 60   | chr7:48838650-48838750 |
| chr7 | 49014950 | 49015050 | 1065-Lng-A-T | 49   | chr7:49014950-49015050 |
| chr7 | 49021750 | 49021850 | 901-Lng-C-T  | 106  | chr7:49021750-49021850 |
| chr7 | 49147450 | 49147550 | 901-Lng-D-T  | 153  | chr7:49147450-49147550 |
| chr7 | 49208450 | 49208550 | 1072-Lng-A-T | 49   | chr7:49208450-49208550 |
| chr7 | 49271650 | 49271750 | 1004-Lng-A-T | 61   | chr7:49271650-49271750 |
| chr7 | 49309850 | 49309950 | 1274-Lng-A-T | 49   | chr7:49309850-49309950 |
| chr7 | 49440350 | 49440450 | 1152-Lng-A-T | 39   | chr7:49440350-49440450 |
| chr7 | 49722650 | 49722750 | 1090-Lng-B-T | 166  | chr7:49722650-49722750 |
| chr7 | 49732950 | 49733050 | 901-Lng-D-T  | 145  | chr7:49732950-49733050 |
| chr7 | 50464950 | 50465050 | 1065-Lng-A-T | 36   | chr7:50464950-50465050 |
| chr7 | 50567050 | 50567150 | 1004-Lng-A-T | 90   | chr7:50567050-50567150 |
| chr7 | 50848750 | 50848850 | 901-Lng-A-T  | 102  | chr7:50848750-50848850 |
| chr7 | 50946450 | 50946550 | 901-Lng-A-T  | 52   | chr7:50946450-50946550 |
| chr7 | 50969250 | 50969350 | 901-Lng-A-T  | 252  | chr7:50969250-50969350 |

**Table S2: SB Insertion regions**

|      |          |          |              |      |                        |
|------|----------|----------|--------------|------|------------------------|
| chr7 | 50974950 | 50975050 | 1151-Lng-A-T | 186  | chr7:50974950-50975050 |
| chr7 | 50975450 | 50975550 | 1274-Lng-A-T | 51   | chr7:50975450-50975550 |
| chr7 | 51327050 | 51327150 | 1004-Lng-A-T | 63   | chr7:51327050-51327150 |
| chr7 | 51671750 | 51671850 | 1004-Lng-A-T | 662  | chr7:51671750-51671850 |
| chr7 | 51749350 | 51749450 | 1223-Lng-A-T | 114  | chr7:51749350-51749450 |
| chr7 | 51931450 | 51931550 | 1100-Lng-A-T | 128  | chr7:51931450-51931550 |
| chr7 | 51948250 | 51948350 | 901-Lng-A-T  | 297  | chr7:51948250-51948350 |
| chr7 | 51981750 | 51981850 | 1274-Lng-A-T | 69   | chr7:51981750-51981850 |
| chr7 | 52006650 | 52006750 | 901-Lng-C-T  | 33   | chr7:52006650-52006750 |
| chr7 | 52072350 | 52072450 | 1274-Lng-A-T | 204  | chr7:52072350-52072450 |
| chr7 | 52130650 | 52130750 | 1072-Lng-A-T | 51   | chr7:52130650-52130750 |
| chr7 | 52182750 | 52182850 | 1065-Lng-A-T | 66   | chr7:52182750-52182850 |
| chr7 | 52445850 | 52445950 | 1274-Lng-A-T | 153  | chr7:52445850-52445950 |
| chr7 | 52581250 | 52581350 | 1274-Lng-A-T | 97   | chr7:52581250-52581350 |
| chr7 | 52595250 | 52595350 | 901-Lng-A-T  | 89   | chr7:52595250-52595350 |
| chr7 | 52620950 | 52621050 | 901-Lng-B-T  | 57   | chr7:52620950-52621050 |
| chr7 | 52838150 | 52838250 | 1004-Lng-A-T | 175  | chr7:52838150-52838250 |
| chr7 | 52881750 | 52881850 | 1223-Lng-A-T | 67   | chr7:52881750-52881850 |
| chr7 | 52926350 | 52926450 | 1065-Lng-C-T | 251  | chr7:52926350-52926450 |
| chr7 | 53153850 | 53153950 | 901-Lng-B-T  | 236  | chr7:53153850-53153950 |
| chr7 | 53226250 | 53226350 | 1065-Lng-B-T | 56   | chr7:53226250-53226350 |
| chr7 | 53394350 | 53394450 | 1090-Lng-B-T | 153  | chr7:53394350-53394450 |
| chr7 | 53463550 | 53463650 | 901-Lng-C-T  | 71   | chr7:53463550-53463650 |
| chr7 | 53594650 | 53594750 | 1072-Lng-A-T | 51   | chr7:53594650-53594750 |
| chr7 | 53616250 | 53616350 | 1274-Lng-A-T | 75   | chr7:53616250-53616350 |
| chr7 | 53793950 | 53794050 | 1065-Lng-C-T | 219  | chr7:53793950-53794050 |
| chr7 | 53923550 | 53923650 | 1072-Lng-A-T | 189  | chr7:53923550-53923650 |
| chr7 | 54037550 | 54037650 | 1065-Lng-B-T | 298  | chr7:54037550-54037650 |
| chr7 | 54163750 | 54163850 | 1223-Lng-D-T | 55   | chr7:54163750-54163850 |
| chr7 | 54165650 | 54165750 | 1151-Lng-A-T | 609  | chr7:54165650-54165750 |
| chr7 | 54169250 | 54169350 | 901-Lng-D-T  | 764  | chr7:54169250-54169350 |
| chr7 | 54210350 | 54210450 | 1090-Lng-B-T | 450  | chr7:54210350-54210450 |
| chr7 | 54240050 | 54240150 | 1065-Lng-C-T | 83   | chr7:54240050-54240150 |
| chr7 | 54259050 | 54259150 | 1152-Lng-A-T | 41   | chr7:54259050-54259150 |
| chr7 | 54275550 | 54275650 | 1223-Lng-C-T | 51   | chr7:54275550-54275650 |
| chr7 | 54279450 | 54279550 | 901-Lng-B-T  | 245  | chr7:54279450-54279550 |
| chr7 | 54305450 | 54305550 | 1274-Lng-A-T | 139  | chr7:54305450-54305550 |
| chr7 | 54330750 | 54330850 | 1223-Lng-C-T | 57   | chr7:54330750-54330850 |
| chr7 | 54352550 | 54352650 | 901-Lng-C-T  | 28   | chr7:54352550-54352650 |
| chr7 | 54367450 | 54367550 | 901-Lng-C-T  | 61   | chr7:54367450-54367550 |
| chr7 | 54392550 | 54392650 | 901-Lng-C-T  | 1853 | chr7:54392550-54392650 |
| chr7 | 54392950 | 54393050 | 901-Lng-C-T  | 41   | chr7:54392950-54393050 |
| chr7 | 54500050 | 54500150 | 1223-Lng-A-T | 58   | chr7:54500050-54500150 |
| chr7 | 54606450 | 54606550 | 1065-Lng-B-T | 47   | chr7:54606450-54606550 |
| chr7 | 54637250 | 54637350 | 1274-Lng-A-T | 126  | chr7:54637250-54637350 |
| chr7 | 54666650 | 54666750 | 1065-Lng-B-T | 56   | chr7:54666650-54666750 |

**Table S2: SB Insertion regions**

|      |          |          |              |      |                        |
|------|----------|----------|--------------|------|------------------------|
| chr7 | 54896450 | 54896550 | 1151-Lng-A-T | 367  | chr7:54896450-54896550 |
| chr7 | 54901250 | 54901350 | 1004-Lng-A-T | 52   | chr7:54901250-54901350 |
| chr7 | 55072550 | 55072650 | 1223-Lng-C-T | 43   | chr7:55072550-55072650 |
| chr7 | 55083050 | 55083150 | 901-Lng-C-T  | 58   | chr7:55083050-55083150 |
| chr7 | 55207950 | 55208050 | 1065-Lng-B-T | 75   | chr7:55207950-55208050 |
| chr7 | 55239150 | 55239250 | 901-Lng-A-T  | 69   | chr7:55239150-55239250 |
| chr7 | 55263950 | 55264050 | 1090-Lng-A-T | 46   | chr7:55263950-55264050 |
| chr7 | 55535350 | 55535450 | 1223-Lng-A-T | 227  | chr7:55535350-55535450 |
| chr7 | 55550850 | 55550950 | 1152-Lng-A-T | 108  | chr7:55550850-55550950 |
| chr7 | 55574850 | 55574950 | 1100-Lng-A-T | 92   | chr7:55574850-55574950 |
| chr7 | 55698350 | 55698450 | 901-Lng-C-T  | 118  | chr7:55698350-55698450 |
| chr7 | 55723850 | 55723950 | 901-Lng-A-T  | 240  | chr7:55723850-55723950 |
| chr7 | 55946550 | 55946650 | 1188-Lng-A-T | 173  | chr7:55946550-55946650 |
| chr7 | 56005550 | 56005650 | 1004-Lng-A-T | 63   | chr7:56005550-56005650 |
| chr7 | 56400750 | 56400850 | 901-Lng-A-T  | 50   | chr7:56400750-56400850 |
| chr7 | 56532250 | 56532350 | 1004-Lng-A-T | 246  | chr7:56532250-56532350 |
| chr7 | 56620050 | 56620150 | 1152-Lng-A-T | 96   | chr7:56620050-56620150 |
| chr7 | 56626350 | 56626450 | 1152-Lng-A-T | 46   | chr7:56626350-56626450 |
| chr7 | 56675850 | 56675950 | 901-Lng-C-T  | 45   | chr7:56675850-56675950 |
| chr7 | 56715150 | 56715250 | 1100-Lng-A-T | 68   | chr7:56715150-56715250 |
| chr7 | 56716950 | 56717050 | 1223-Lng-C-T | 259  | chr7:56716950-56717050 |
| chr7 | 56782150 | 56782250 | 1090-Lng-A-T | 52   | chr7:56782150-56782250 |
| chr7 | 56797750 | 56797850 | 1065-Lng-B-T | 74   | chr7:56797750-56797850 |
| chr7 | 56848850 | 56848950 | 1090-Lng-A-T | 45   | chr7:56848850-56848950 |
| chr7 | 57083250 | 57083350 | 1100-Lng-B-T | 52   | chr7:57083250-57083350 |
| chr7 | 57148550 | 57148650 | 1223-Lng-A-T | 108  | chr7:57148550-57148650 |
| chr7 | 57354450 | 57354550 | 1223-Lng-C-T | 46   | chr7:57354450-57354550 |
| chr7 | 57405950 | 57406050 | 1004-Lng-A-T | 74   | chr7:57405950-57406050 |
| chr7 | 57534350 | 57534450 | 1004-Lng-A-T | 1321 | chr7:57534350-57534450 |
| chr7 | 57647650 | 57647750 | 901-Lng-D-T  | 159  | chr7:57647650-57647750 |
| chr7 | 57933350 | 57933450 | 846-Lng-A-T  | 192  | chr7:57933350-57933450 |
| chr7 | 58269150 | 58269250 | 1065-Lng-A-T | 196  | chr7:58269150-58269250 |
| chr7 | 58708650 | 58708750 | 1223-Lng-C-T | 58   | chr7:58708650-58708750 |
| chr7 | 58822050 | 58822150 | 901-Lng-B-T  | 85   | chr7:58822050-58822150 |
| chr7 | 58948050 | 58948150 | 901-Lng-B-T  | 44   | chr7:58948050-58948150 |
| chr7 | 59041650 | 59041750 | 1065-Lng-B-T | 41   | chr7:59041650-59041750 |
| chr7 | 59197750 | 59197850 | 1188-Lng-A-T | 201  | chr7:59197750-59197850 |
| chr7 | 59249250 | 59249350 | 1072-Lng-A-T | 55   | chr7:59249250-59249350 |
| chr7 | 59251850 | 59251950 | 901-Lng-A-T  | 64   | chr7:59251850-59251950 |
| chr7 | 59880250 | 59880350 | 1223-Lng-B-T | 45   | chr7:59880250-59880350 |
| chr7 | 60314950 | 60315050 | 1152-Lng-A-T | 115  | chr7:60314950-60315050 |
| chr7 | 60461550 | 60461650 | 1004-Lng-A-T | 63   | chr7:60461550-60461650 |
| chr7 | 60590650 | 60590750 | 901-Lng-B-T  | 117  | chr7:60590650-60590750 |
| chr7 | 60616750 | 60616850 | 1090-Lng-A-T | 67   | chr7:60616750-60616850 |
| chr7 | 60773050 | 60773150 | 1065-Lng-B-T | 277  | chr7:60773050-60773150 |
| chr7 | 61064050 | 61064150 | 901-Lng-C-T  | 38   | chr7:61064050-61064150 |

**Table S2: SB Insertion regions**

|      |          |          |              |     |                        |
|------|----------|----------|--------------|-----|------------------------|
| chr7 | 61146850 | 61146950 | 1090-Lng-A-T | 75  | chr7:61146850-61146950 |
| chr7 | 61162450 | 61162550 | 1004-Lng-A-T | 75  | chr7:61162450-61162550 |
| chr7 | 61214850 | 61214950 | 1274-Lng-A-T | 74  | chr7:61214850-61214950 |
| chr7 | 61301050 | 61301150 | 1223-Lng-B-T | 45  | chr7:61301050-61301150 |
| chr7 | 61341450 | 61341550 | 1004-Lng-A-T | 76  | chr7:61341450-61341550 |
| chr7 | 61381650 | 61381750 | 1152-Lng-A-T | 41  | chr7:61381650-61381750 |
| chr7 | 61399950 | 61400050 | 1090-Lng-A-T | 90  | chr7:61399950-61400050 |
| chr7 | 61665450 | 61665550 | 1004-Lng-A-T | 59  | chr7:61665450-61665550 |
| chr7 | 61795250 | 61795350 | 1090-Lng-B-T | 665 | chr7:61795250-61795350 |
| chr7 | 62153450 | 62153550 | 1004-Lng-A-T | 121 | chr7:62153450-62153550 |
| chr7 | 62185750 | 62185850 | 1004-Lng-A-T | 80  | chr7:62185750-62185850 |
| chr7 | 62235350 | 62235450 | 1223-Lng-A-T | 973 | chr7:62235350-62235450 |
| chr7 | 62275950 | 62276050 | 1072-Lng-A-T | 75  | chr7:62275950-62276050 |
| chr7 | 62353250 | 62353350 | 1065-Lng-C-T | 82  | chr7:62353250-62353350 |
| chr7 | 62379450 | 62379550 | 1090-Lng-A-T | 111 | chr7:62379450-62379550 |
| chr7 | 62411150 | 62411250 | 1167-Lng-A-T | 76  | chr7:62411150-62411250 |
| chr7 | 62709150 | 62709250 | 1223-Lng-A-T | 76  | chr7:62709150-62709250 |
| chr7 | 62833050 | 62833150 | 1188-Lng-A-T | 42  | chr7:62833050-62833150 |
| chr7 | 63043150 | 63043250 | 1151-Lng-A-T | 61  | chr7:63043150-63043250 |
| chr7 | 63095050 | 63095150 | 1065-Lng-A-T | 38  | chr7:63095050-63095150 |
| chr7 | 63098950 | 63099050 | 1167-Lng-A-T | 57  | chr7:63098950-63099050 |
| chr7 | 63193050 | 63193150 | 1151-Lng-A-T | 61  | chr7:63193050-63193150 |
| chr7 | 63229250 | 63229350 | 1151-Lng-A-T | 63  | chr7:63229250-63229350 |
| chr7 | 63296950 | 63297050 | 901-Lng-C-T  | 119 | chr7:63296950-63297050 |
| chr7 | 63413850 | 63413950 | 901-Lng-C-T  | 39  | chr7:63413850-63413950 |
| chr7 | 63531150 | 63531250 | 1090-Lng-A-T | 53  | chr7:63531150-63531250 |
| chr7 | 63864350 | 63864450 | 1223-Lng-A-T | 108 | chr7:63864350-63864450 |
| chr7 | 63907450 | 63907550 | 1223-Lng-C-T | 73  | chr7:63907450-63907550 |
| chr7 | 64217450 | 64217550 | 1072-Lng-A-T | 49  | chr7:64217450-64217550 |
| chr7 | 64423650 | 64423750 | 846-Lng-A-T  | 129 | chr7:64423650-64423750 |
| chr7 | 64446950 | 64447050 | 1065-Lng-B-T | 67  | chr7:64446950-64447050 |
| chr7 | 64571850 | 64571950 | 1072-Lng-A-T | 60  | chr7:64571850-64571950 |
| chr7 | 64734350 | 64734450 | 1274-Lng-A-T | 86  | chr7:64734350-64734450 |
| chr7 | 65069050 | 65069150 | 901-Lng-B-T  | 241 | chr7:65069050-65069150 |
| chr7 | 65441850 | 65441950 | 901-Lng-C-T  | 57  | chr7:65441850-65441950 |
| chr7 | 65523350 | 65523450 | 1072-Lng-A-T | 50  | chr7:65523350-65523450 |
| chr7 | 65586650 | 65586750 | 901-Lng-A-T  | 159 | chr7:65586650-65586750 |
| chr7 | 65887050 | 65887150 | 901-Lng-C-T  | 53  | chr7:65887050-65887150 |
| chr7 | 65942450 | 65942550 | 1188-Lng-A-T | 43  | chr7:65942450-65942550 |
| chr7 | 66060850 | 66060950 | 1152-Lng-A-T | 88  | chr7:66060850-66060950 |
| chr7 | 66123150 | 66123250 | 846-Lng-A-T  | 78  | chr7:66123150-66123250 |
| chr7 | 66157850 | 66157950 | 901-Lng-A-T  | 82  | chr7:66157850-66157950 |
| chr7 | 66173850 | 66173950 | 1100-Lng-A-T | 96  | chr7:66173850-66173950 |
| chr7 | 66268850 | 66268950 | 1004-Lng-A-T | 65  | chr7:66268850-66268950 |
| chr7 | 66282050 | 66282150 | 1065-Lng-C-T | 79  | chr7:66282050-66282150 |
| chr7 | 66507650 | 66507750 | 1151-Lng-A-T | 81  | chr7:66507650-66507750 |

**Table S2: SB Insertion regions**

|      |          |          |              |     |                        |
|------|----------|----------|--------------|-----|------------------------|
| chr7 | 66512250 | 66512350 | 1152-Lng-A-T | 159 | chr7:66512250-66512350 |
| chr7 | 66544950 | 66545050 | 1223-Lng-B-T | 42  | chr7:66544950-66545050 |
| chr7 | 66572350 | 66572450 | 1274-Lng-A-T | 110 | chr7:66572350-66572450 |
| chr7 | 66573950 | 66574050 | 1065-Lng-A-T | 63  | chr7:66573950-66574050 |
| chr7 | 66580250 | 66580350 | 1223-Lng-D-T | 44  | chr7:66580250-66580350 |
| chr7 | 67041750 | 67041850 | 1065-Lng-B-T | 67  | chr7:67041750-67041850 |
| chr7 | 67103450 | 67103550 | 1152-Lng-A-T | 49  | chr7:67103450-67103550 |
| chr7 | 67263250 | 67263350 | 1072-Lng-A-T | 85  | chr7:67263250-67263350 |
| chr7 | 67425950 | 67426050 | 1152-Lng-A-T | 36  | chr7:67425950-67426050 |
| chr7 | 67542550 | 67542650 | 1090-Lng-A-T | 89  | chr7:67542550-67542650 |
| chr7 | 67556450 | 67556550 | 1004-Lng-A-T | 53  | chr7:67556450-67556550 |
| chr7 | 67581550 | 67581650 | 1223-Lng-B-T | 45  | chr7:67581550-67581650 |
| chr7 | 67755350 | 67755450 | 901-Lng-D-T  | 230 | chr7:67755350-67755450 |
| chr7 | 67780450 | 67780550 | 1004-Lng-A-T | 70  | chr7:67780450-67780550 |
| chr7 | 67869550 | 67869650 | 1090-Lng-A-T | 60  | chr7:67869550-67869650 |
| chr7 | 68007450 | 68007550 | 1188-Lng-A-T | 47  | chr7:68007450-68007550 |
| chr7 | 68058550 | 68058650 | 901-Lng-A-T  | 137 | chr7:68058550-68058650 |
| chr7 | 68210750 | 68210850 | 1223-Lng-D-T | 46  | chr7:68210750-68210850 |
| chr7 | 68236350 | 68236450 | 1065-Lng-B-T | 95  | chr7:68236350-68236450 |
| chr7 | 68242950 | 68243050 | 1004-Lng-A-T | 49  | chr7:68242950-68243050 |
| chr7 | 68251350 | 68251450 | 1065-Lng-C-T | 79  | chr7:68251350-68251450 |
| chr7 | 68324450 | 68324550 | 1072-Lng-A-T | 52  | chr7:68324450-68324550 |
| chr7 | 68441450 | 68441550 | 1223-Lng-C-T | 46  | chr7:68441450-68441550 |
| chr7 | 68671550 | 68671650 | 1065-Lng-B-T | 43  | chr7:68671550-68671650 |
| chr7 | 68723150 | 68723250 | 1065-Lng-C-T | 68  | chr7:68723150-68723250 |
| chr7 | 69068450 | 69068550 | 1188-Lng-A-T | 77  | chr7:69068450-69068550 |
| chr7 | 69120050 | 69120150 | 901-Lng-A-T  | 200 | chr7:69120050-69120150 |
| chr7 | 69120650 | 69120750 | 1167-Lng-A-T | 62  | chr7:69120650-69120750 |
| chr7 | 69125050 | 69125150 | 901-Lng-A-T  | 116 | chr7:69125050-69125150 |
| chr7 | 69199150 | 69199250 | 901-Lng-A-T  | 67  | chr7:69199150-69199250 |
| chr7 | 69353150 | 69353250 | 901-Lng-A-T  | 122 | chr7:69353150-69353250 |
| chr7 | 69480850 | 69480950 | 901-Lng-D-T  | 64  | chr7:69480850-69480950 |
| chr7 | 69505550 | 69505650 | 1065-Lng-C-T | 163 | chr7:69505550-69505650 |
| chr7 | 69706250 | 69706350 | 1152-Lng-A-T | 48  | chr7:69706250-69706350 |
| chr7 | 69796150 | 69796250 | 901-Lng-A-T  | 88  | chr7:69796150-69796250 |
| chr7 | 70048350 | 70048450 | 1223-Lng-A-T | 112 | chr7:70048350-70048450 |
| chr7 | 70076950 | 70077050 | 1065-Lng-A-T | 38  | chr7:70076950-70077050 |
| chr7 | 70124250 | 70124350 | 901-Lng-B-T  | 162 | chr7:70124250-70124350 |
| chr7 | 70160550 | 70160650 | 1072-Lng-A-T | 59  | chr7:70160550-70160650 |
| chr7 | 70486550 | 70486650 | 1223-Lng-C-T | 47  | chr7:70486550-70486650 |
| chr7 | 70673850 | 70673950 | 1065-Lng-A-T | 62  | chr7:70673850-70673950 |
| chr7 | 70752350 | 70752450 | 1065-Lng-A-T | 189 | chr7:70752350-70752450 |
| chr7 | 70752650 | 70752750 | 1151-Lng-A-T | 128 | chr7:70752650-70752750 |
| chr7 | 70777850 | 70777950 | 1072-Lng-A-T | 56  | chr7:70777850-70777950 |
| chr7 | 70815350 | 70815450 | 1100-Lng-A-T | 100 | chr7:70815350-70815450 |
| chr7 | 70994450 | 70994550 | 1223-Lng-B-T | 274 | chr7:70994450-70994550 |



**Table S2: SB Insertion regions**

|      |          |          |              |     |                        |
|------|----------|----------|--------------|-----|------------------------|
| chr7 | 71042750 | 71042850 | 1274-Lng-A-T | 84  | chr7:71042750-71042850 |
| chr7 | 71060950 | 71061050 | 1065-Lng-A-T | 83  | chr7:71060950-71061050 |
| chr7 | 71090250 | 71090350 | 1274-Lng-A-T | 72  | chr7:71090250-71090350 |
| chr7 | 71129750 | 71129850 | 1223-Lng-A-T | 63  | chr7:71129750-71129850 |
| chr7 | 71140250 | 71140350 | 1223-Lng-C-T | 323 | chr7:71140250-71140350 |
| chr7 | 71157850 | 71157950 | 1223-Lng-B-T | 162 | chr7:71157850-71157950 |
| chr7 | 71192750 | 71192850 | 901-Lng-A-T  | 414 | chr7:71192750-71192850 |
| chr7 | 71214050 | 71214150 | 901-Lng-D-T  | 106 | chr7:71214050-71214150 |
| chr7 | 71358350 | 71358450 | 1151-Lng-A-T | 152 | chr7:71358350-71358450 |
| chr7 | 71377650 | 71377750 | 1188-Lng-A-T | 36  | chr7:71377650-71377750 |
| chr7 | 71541850 | 71541950 | 1090-Lng-A-T | 69  | chr7:71541850-71541950 |
| chr7 | 71776950 | 71777050 | 1167-Lng-A-T | 67  | chr7:71776950-71777050 |
| chr7 | 72438950 | 72439050 | 901-Lng-C-T  | 196 | chr7:72438950-72439050 |
| chr7 | 72489050 | 72489150 | 1223-Lng-C-T | 44  | chr7:72489050-72489150 |
| chr7 | 72489550 | 72489650 | 1167-Lng-A-T | 46  | chr7:72489550-72489650 |
| chr7 | 72507950 | 72508050 | 1223-Lng-A-T | 188 | chr7:72507950-72508050 |
| chr7 | 72507950 | 72508050 | 1223-Lng-C-T | 103 | chr7:72507950-72508050 |
| chr7 | 72512150 | 72512250 | 1072-Lng-A-T | 220 | chr7:72512150-72512250 |
| chr7 | 72585750 | 72585850 | 1223-Lng-C-T | 70  | chr7:72585750-72585850 |
| chr7 | 72635250 | 72635350 | 901-Lng-A-T  | 58  | chr7:72635250-72635350 |
| chr7 | 72642550 | 72642650 | 1100-Lng-A-T | 52  | chr7:72642550-72642650 |
| chr7 | 72726650 | 72726750 | 1188-Lng-A-T | 35  | chr7:72726650-72726750 |
| chr7 | 72745450 | 72745550 | 1065-Lng-C-T | 73  | chr7:72745450-72745550 |
| chr7 | 72816050 | 72816150 | 901-Lng-D-T  | 347 | chr7:72816050-72816150 |
| chr7 | 72847450 | 72847550 | 1065-Lng-C-T | 73  | chr7:72847450-72847550 |
| chr7 | 72897350 | 72897450 | 1065-Lng-A-T | 101 | chr7:72897350-72897450 |
| chr7 | 73220850 | 73220950 | 1065-Lng-A-T | 81  | chr7:73220850-73220950 |
| chr7 | 73228250 | 73228350 | 1223-Lng-C-T | 43  | chr7:73228250-73228350 |
| chr7 | 73282050 | 73282150 | 1090-Lng-B-T | 637 | chr7:73282050-73282150 |
| chr7 | 73305250 | 73305350 | 901-Lng-A-T  | 84  | chr7:73305250-73305350 |
| chr7 | 73311850 | 73311950 | 1223-Lng-C-T | 44  | chr7:73311850-73311950 |
| chr7 | 73328550 | 73328650 | 1188-Lng-A-T | 117 | chr7:73328550-73328650 |
| chr7 | 73471250 | 73471350 | 1004-Lng-A-T | 85  | chr7:73471250-73471350 |
| chr7 | 73488850 | 73488950 | 1004-Lng-A-T | 136 | chr7:73488850-73488950 |
| chr7 | 73491750 | 73491850 | 1152-Lng-A-T | 80  | chr7:73491750-73491850 |
| chr7 | 73503450 | 73503550 | 901-Lng-C-T  | 112 | chr7:73503450-73503550 |
| chr7 | 73509750 | 73509850 | 1223-Lng-B-T | 133 | chr7:73509750-73509850 |
| chr7 | 73515650 | 73515750 | 1223-Lng-B-T | 36  | chr7:73515650-73515750 |
| chr7 | 73579750 | 73579850 | 1065-Lng-B-T | 291 | chr7:73579750-73579850 |
| chr7 | 73860550 | 73860650 | 1188-Lng-A-T | 220 | chr7:73860550-73860650 |
| chr7 | 73918650 | 73918750 | 1274-Lng-A-T | 116 | chr7:73918650-73918750 |
| chr7 | 74106250 | 74106350 | 1152-Lng-A-T | 57  | chr7:74106250-74106350 |
| chr7 | 74338350 | 74338450 | 1065-Lng-B-T | 58  | chr7:74338350-74338450 |
| chr7 | 74412550 | 74412650 | 1072-Lng-A-T | 55  | chr7:74412550-74412650 |
| chr7 | 74414950 | 74415050 | 846-Lng-A-T  | 63  | chr7:74414950-74415050 |
| chr7 | 74428550 | 74428650 | 1004-Lng-A-T | 352 | chr7:74428550-74428650 |

**Table S2: SB Insertion regions**

|      |          |          |              |      |                        |
|------|----------|----------|--------------|------|------------------------|
| chr7 | 74436550 | 74436650 | 1004-Lng-A-T | 68   | chr7:74436550-74436650 |
| chr7 | 74474850 | 74474950 | 1072-Lng-A-T | 116  | chr7:74474850-74474950 |
| chr7 | 74481350 | 74481450 | 1065-Lng-B-T | 60   | chr7:74481350-74481450 |
| chr7 | 74483950 | 74484050 | 1090-Lng-A-T | 74   | chr7:74483950-74484050 |
| chr7 | 74489450 | 74489550 | 1274-Lng-A-T | 70   | chr7:74489450-74489550 |
| chr7 | 74496850 | 74496950 | 1004-Lng-A-T | 62   | chr7:74496850-74496950 |
| chr7 | 74552350 | 74552450 | 1065-Lng-C-T | 97   | chr7:74552350-74552450 |
| chr7 | 74629050 | 74629150 | 1167-Lng-A-T | 51   | chr7:74629050-74629150 |
| chr7 | 74787150 | 74787250 | 1223-Lng-B-T | 68   | chr7:74787150-74787250 |
| chr7 | 74804050 | 74804150 | 901-Lng-C-T  | 49   | chr7:74804050-74804150 |
| chr7 | 74846750 | 74846850 | 1274-Lng-A-T | 50   | chr7:74846750-74846850 |
| chr7 | 74967450 | 74967550 | 1004-Lng-A-T | 767  | chr7:74967450-74967550 |
| chr7 | 75192250 | 75192350 | 1065-Lng-B-T | 80   | chr7:75192250-75192350 |
| chr7 | 75207450 | 75207550 | 1167-Lng-A-T | 46   | chr7:75207450-75207550 |
| chr7 | 75583850 | 75583950 | 1223-Lng-A-T | 302  | chr7:75583850-75583950 |
| chr7 | 75640550 | 75640650 | 1004-Lng-A-T | 70   | chr7:75640550-75640650 |
| chr7 | 75672950 | 75673050 | 1065-Lng-A-T | 40   | chr7:75672950-75673050 |
| chr7 | 75942550 | 75942650 | 1188-Lng-A-T | 42   | chr7:75942550-75942650 |
| chr7 | 76026850 | 76026950 | 901-Lng-A-T  | 160  | chr7:76026850-76026950 |
| chr7 | 76036650 | 76036750 | 1090-Lng-A-T | 129  | chr7:76036650-76036750 |
| chr7 | 76074550 | 76074650 | 1152-Lng-A-T | 40   | chr7:76074550-76074650 |
| chr7 | 76111250 | 76111350 | 1072-Lng-A-T | 74   | chr7:76111250-76111350 |
| chr7 | 76167050 | 76167150 | 1090-Lng-A-T | 1397 | chr7:76167050-76167150 |
| chr7 | 76371750 | 76371850 | 901-Lng-A-T  | 50   | chr7:76371750-76371850 |
| chr7 | 76467850 | 76467950 | 1065-Lng-B-T | 40   | chr7:76467850-76467950 |
| chr7 | 76471350 | 76471450 | 1223-Lng-B-T | 43   | chr7:76471350-76471450 |
| chr7 | 76484450 | 76484550 | 901-Lng-C-T  | 65   | chr7:76484450-76484550 |
| chr7 | 76747750 | 76747850 | 1065-Lng-B-T | 81   | chr7:76747750-76747850 |
| chr7 | 76864950 | 76865050 | 846-Lng-A-T  | 43   | chr7:76864950-76865050 |
| chr7 | 77357050 | 77357150 | 1004-Lng-A-T | 56   | chr7:77357050-77357150 |
| chr7 | 77516950 | 77517050 | 901-Lng-C-T  | 40   | chr7:77516950-77517050 |
| chr7 | 77582550 | 77582650 | 1065-Lng-C-T | 69   | chr7:77582550-77582650 |
| chr7 | 77656650 | 77656750 | 1167-Lng-A-T | 52   | chr7:77656650-77656750 |
| chr7 | 77658150 | 77658250 | 1223-Lng-C-T | 52   | chr7:77658150-77658250 |
| chr7 | 77659350 | 77659450 | 1152-Lng-A-T | 302  | chr7:77659350-77659450 |
| chr7 | 77789650 | 77789750 | 1065-Lng-A-T | 70   | chr7:77789650-77789750 |
| chr7 | 77908750 | 77908850 | 901-Lng-D-T  | 171  | chr7:77908750-77908850 |
| chr7 | 78133750 | 78133850 | 1274-Lng-A-T | 125  | chr7:78133750-78133850 |
| chr7 | 78295250 | 78295350 | 901-Lng-C-T  | 97   | chr7:78295250-78295350 |
| chr7 | 78426250 | 78426350 | 1004-Lng-A-T | 91   | chr7:78426250-78426350 |
| chr7 | 78470650 | 78470750 | 1004-Lng-A-T | 744  | chr7:78470650-78470750 |
| chr7 | 78590850 | 78590950 | 901-Lng-C-T  | 50   | chr7:78590850-78590950 |
| chr7 | 78715350 | 78715450 | 1065-Lng-B-T | 41   | chr7:78715350-78715450 |
| chr7 | 78805650 | 78805750 | 1065-Lng-B-T | 96   | chr7:78805650-78805750 |
| chr7 | 79304850 | 79304950 | 1072-Lng-A-T | 77   | chr7:79304850-79304950 |
| chr7 | 79424350 | 79424450 | 1004-Lng-A-T | 152  | chr7:79424350-79424450 |

**Table S2: SB Insertion regions**

|      |          |          |              |      |                        |
|------|----------|----------|--------------|------|------------------------|
| chr7 | 79815750 | 79815850 | 1072-Lng-A-T | 94   | chr7:79815750-79815850 |
| chr7 | 80416150 | 80416250 | 1004-Lng-A-T | 52   | chr7:80416150-80416250 |
| chr7 | 80555050 | 80555150 | 1065-Lng-C-T | 77   | chr7:80555050-80555150 |
| chr7 | 80579350 | 80579450 | 1065-Lng-B-T | 55   | chr7:80579350-80579450 |
| chr7 | 80583250 | 80583350 | 1151-Lng-A-T | 483  | chr7:80583250-80583350 |
| chr7 | 80648550 | 80648650 | 1151-Lng-A-T | 81   | chr7:80648550-80648650 |
| chr7 | 80666650 | 80666750 | 1223-Lng-D-T | 40   | chr7:80666650-80666750 |
| chr7 | 80687750 | 80687850 | 1090-Lng-A-T | 50   | chr7:80687750-80687850 |
| chr7 | 80698550 | 80698650 | 1065-Lng-B-T | 46   | chr7:80698550-80698650 |
| chr7 | 80765050 | 80765150 | 1065-Lng-A-T | 52   | chr7:80765050-80765150 |
| chr7 | 80765350 | 80765450 | 846-Lng-A-T  | 59   | chr7:80765350-80765450 |
| chr7 | 81284350 | 81284450 | 1274-Lng-A-T | 70   | chr7:81284350-81284450 |
| chr7 | 81546250 | 81546350 | 1167-Lng-A-T | 173  | chr7:81546250-81546350 |
| chr7 | 81582950 | 81583050 | 1274-Lng-A-T | 132  | chr7:81582950-81583050 |
| chr7 | 81588050 | 81588150 | 1100-Lng-B-T | 177  | chr7:81588050-81588150 |
| chr7 | 81612250 | 81612350 | 1223-Lng-B-T | 78   | chr7:81612250-81612350 |
| chr7 | 81631950 | 81632050 | 1004-Lng-A-T | 560  | chr7:81631950-81632050 |
| chr7 | 81683550 | 81683650 | 1065-Lng-A-T | 42   | chr7:81683550-81683650 |
| chr7 | 81685050 | 81685150 | 1004-Lng-A-T | 71   | chr7:81685050-81685150 |
| chr7 | 81728250 | 81728350 | 1072-Lng-A-T | 64   | chr7:81728250-81728350 |
| chr7 | 81853850 | 81853950 | 1223-Lng-A-T | 51   | chr7:81853850-81853950 |
| chr7 | 81927750 | 81927850 | 901-Lng-B-T  | 158  | chr7:81927750-81927850 |
| chr7 | 82005050 | 82005150 | 1223-Lng-B-T | 103  | chr7:82005050-82005150 |
| chr7 | 82226650 | 82226750 | 1072-Lng-A-T | 59   | chr7:82226650-82226750 |
| chr7 | 82280250 | 82280350 | 1065-Lng-A-T | 49   | chr7:82280250-82280350 |
| chr7 | 82318850 | 82318950 | 1167-Lng-A-T | 90   | chr7:82318850-82318950 |
| chr7 | 82421650 | 82421750 | 1072-Lng-A-T | 175  | chr7:82421650-82421750 |
| chr7 | 82613050 | 82613150 | 1223-Lng-D-T | 49   | chr7:82613050-82613150 |
| chr7 | 82622750 | 82622850 | 1152-Lng-A-T | 76   | chr7:82622750-82622850 |
| chr7 | 82651650 | 82651750 | 846-Lng-A-T  | 137  | chr7:82651650-82651750 |
| chr7 | 82666050 | 82666150 | 1065-Lng-A-T | 76   | chr7:82666050-82666150 |
| chr7 | 82702050 | 82702150 | 1004-Lng-A-T | 287  | chr7:82702050-82702150 |
| chr7 | 82702550 | 82702650 | 901-Lng-C-T  | 45   | chr7:82702550-82702650 |
| chr7 | 82716350 | 82716450 | 1152-Lng-A-T | 70   | chr7:82716350-82716450 |
| chr7 | 82726750 | 82726850 | 1223-Lng-D-T | 51   | chr7:82726750-82726850 |
| chr7 | 82747050 | 82747150 | 1274-Lng-A-T | 185  | chr7:82747050-82747150 |
| chr7 | 82834750 | 82834850 | 1065-Lng-B-T | 51   | chr7:82834750-82834850 |
| chr7 | 82879150 | 82879250 | 846-Lng-A-T  | 58   | chr7:82879150-82879250 |
| chr7 | 83004450 | 83004550 | 1151-Lng-A-T | 63   | chr7:83004450-83004550 |
| chr7 | 83183550 | 83183650 | 1004-Lng-A-T | 63   | chr7:83183550-83183650 |
| chr7 | 83287450 | 83287550 | 1065-Lng-A-T | 105  | chr7:83287450-83287550 |
| chr7 | 83784850 | 83784950 | 1065-Lng-A-T | 42   | chr7:83784850-83784950 |
| chr7 | 83824450 | 83824550 | 1223-Lng-A-T | 2318 | chr7:83824450-83824550 |
| chr7 | 83930450 | 83930550 | 1065-Lng-C-T | 86   | chr7:83930450-83930550 |
| chr7 | 84009550 | 84009650 | 1274-Lng-A-T | 83   | chr7:84009550-84009650 |
| chr7 | 84021150 | 84021250 | 901-Lng-B-T  | 40   | chr7:84021150-84021250 |

**Table S2: SB Insertion regions**

|      |          |          |              |      |                        |
|------|----------|----------|--------------|------|------------------------|
| chr7 | 84175350 | 84175450 | 1152-Lng-A-T | 33   | chr7:84175350-84175450 |
| chr7 | 84180550 | 84180650 | 1152-Lng-A-T | 49   | chr7:84180550-84180650 |
| chr7 | 84236850 | 84236950 | 1065-Lng-C-T | 63   | chr7:84236850-84236950 |
| chr7 | 84373750 | 84373850 | 901-Lng-A-T  | 176  | chr7:84373750-84373850 |
| chr7 | 84384750 | 84384850 | 1223-Lng-D-T | 45   | chr7:84384750-84384850 |
| chr7 | 84450150 | 84450250 | 1004-Lng-A-T | 64   | chr7:84450150-84450250 |
| chr7 | 84985050 | 84985150 | 1004-Lng-A-T | 56   | chr7:84985050-84985150 |
| chr7 | 85049050 | 85049150 | 1004-Lng-A-T | 62   | chr7:85049050-85049150 |
| chr7 | 85116950 | 85117050 | 901-Lng-C-T  | 34   | chr7:85116950-85117050 |
| chr7 | 85174250 | 85174350 | 901-Lng-A-T  | 361  | chr7:85174250-85174350 |
| chr7 | 85222650 | 85222750 | 901-Lng-B-T  | 38   | chr7:85222650-85222750 |
| chr7 | 85312950 | 85313050 | 846-Lng-A-T  | 128  | chr7:85312950-85313050 |
| chr7 | 85368350 | 85368450 | 1065-Lng-A-T | 34   | chr7:85368350-85368450 |
| chr7 | 85408750 | 85408850 | 1152-Lng-A-T | 259  | chr7:85408750-85408850 |
| chr7 | 85448350 | 85448450 | 901-Lng-A-T  | 425  | chr7:85448350-85448450 |
| chr7 | 85569250 | 85569350 | 1065-Lng-B-T | 613  | chr7:85569250-85569350 |
| chr7 | 85860650 | 85860750 | 1065-Lng-C-T | 79   | chr7:85860650-85860750 |
| chr7 | 85896750 | 85896850 | 1100-Lng-B-T | 60   | chr7:85896750-85896850 |
| chr7 | 86284550 | 86284650 | 1151-Lng-A-T | 55   | chr7:86284550-86284650 |
| chr7 | 86327050 | 86327150 | 1004-Lng-A-T | 71   | chr7:86327050-86327150 |
| chr7 | 86349750 | 86349850 | 1100-Lng-B-T | 453  | chr7:86349750-86349850 |
| chr7 | 86393450 | 86393550 | 1188-Lng-A-T | 161  | chr7:86393450-86393550 |
| chr7 | 86433250 | 86433350 | 1223-Lng-C-T | 86   | chr7:86433250-86433350 |
| chr7 | 86435550 | 86435650 | 1223-Lng-B-T | 228  | chr7:86435550-86435650 |
| chr7 | 86459350 | 86459450 | 901-Lng-B-T  | 131  | chr7:86459350-86459450 |
| chr7 | 86555850 | 86555950 | 846-Lng-A-T  | 139  | chr7:86555850-86555950 |
| chr7 | 86603250 | 86603350 | 901-Lng-B-T  | 40   | chr7:86603250-86603350 |
| chr7 | 86643550 | 86643650 | 1100-Lng-B-T | 64   | chr7:86643550-86643650 |
| chr7 | 87048850 | 87048950 | 1100-Lng-A-T | 81   | chr7:87048850-87048950 |
| chr7 | 87053650 | 87053750 | 901-Lng-A-T  | 65   | chr7:87053650-87053750 |
| chr7 | 87089150 | 87089250 | 1072-Lng-A-T | 51   | chr7:87089150-87089250 |
| chr7 | 87207250 | 87207350 | 1223-Lng-C-T | 62   | chr7:87207250-87207350 |
| chr7 | 87237050 | 87237150 | 1223-Lng-B-T | 35   | chr7:87237050-87237150 |
| chr7 | 87249550 | 87249650 | 1274-Lng-A-T | 66   | chr7:87249550-87249650 |
| chr7 | 87297550 | 87297650 | 1065-Lng-B-T | 1431 | chr7:87297550-87297650 |
| chr7 | 87316850 | 87316950 | 901-Lng-C-T  | 84   | chr7:87316850-87316950 |
| chr7 | 87424150 | 87424250 | 1065-Lng-A-T | 163  | chr7:87424150-87424250 |
| chr7 | 87461550 | 87461650 | 901-Lng-D-T  | 400  | chr7:87461550-87461650 |
| chr7 | 87483450 | 87483550 | 1065-Lng-B-T | 42   | chr7:87483450-87483550 |
| chr7 | 87554150 | 87554250 | 1100-Lng-B-T | 98   | chr7:87554150-87554250 |
| chr7 | 87626250 | 87626350 | 1065-Lng-C-T | 63   | chr7:87626250-87626350 |
| chr7 | 87779850 | 87779950 | 1223-Lng-C-T | 90   | chr7:87779850-87779950 |
| chr7 | 87802250 | 87802350 | 1223-Lng-A-T | 510  | chr7:87802250-87802350 |
| chr7 | 87831350 | 87831450 | 1274-Lng-A-T | 53   | chr7:87831350-87831450 |
| chr7 | 87848050 | 87848150 | 901-Lng-C-T  | 120  | chr7:87848050-87848150 |
| chr7 | 87900950 | 87901050 | 1004-Lng-A-T | 627  | chr7:87900950-87901050 |

**Table S2: SB Insertion regions**

|      |          |          |              |      |                        |
|------|----------|----------|--------------|------|------------------------|
| chr7 | 87909550 | 87909650 | 1223-Lng-B-T | 62   | chr7:87909550-87909650 |
| chr7 | 87914550 | 87914650 | 1065-Lng-A-T | 721  | chr7:87914550-87914650 |
| chr7 | 87928250 | 87928350 | 1100-Lng-A-T | 63   | chr7:87928250-87928350 |
| chr7 | 87980050 | 87980150 | 1223-Lng-B-T | 51   | chr7:87980050-87980150 |
| chr7 | 88006850 | 88006950 | 1100-Lng-A-T | 70   | chr7:88006850-88006950 |
| chr7 | 88043850 | 88043950 | 901-Lng-C-T  | 32   | chr7:88043850-88043950 |
| chr7 | 88147750 | 88147850 | 1167-Lng-A-T | 87   | chr7:88147750-88147850 |
| chr7 | 88182050 | 88182150 | 1167-Lng-A-T | 48   | chr7:88182050-88182150 |
| chr7 | 88414650 | 88414750 | 1167-Lng-A-T | 47   | chr7:88414650-88414750 |
| chr7 | 88583050 | 88583150 | 1152-Lng-A-T | 95   | chr7:88583050-88583150 |
| chr7 | 88705350 | 88705450 | 901-Lng-C-T  | 83   | chr7:88705350-88705450 |
| chr7 | 88711350 | 88711450 | 1065-Lng-B-T | 111  | chr7:88711350-88711450 |
| chr7 | 88730350 | 88730450 | 901-Lng-C-T  | 57   | chr7:88730350-88730450 |
| chr7 | 88836850 | 88836950 | 1223-Lng-B-T | 74   | chr7:88836850-88836950 |
| chr7 | 89022950 | 89023050 | 1223-Lng-A-T | 72   | chr7:89022950-89023050 |
| chr7 | 89114350 | 89114450 | 1167-Lng-A-T | 122  | chr7:89114350-89114450 |
| chr7 | 89581550 | 89581650 | 1152-Lng-A-T | 305  | chr7:89581550-89581650 |
| chr7 | 89655250 | 89655350 | 1090-Lng-A-T | 60   | chr7:89655250-89655350 |
| chr7 | 89812750 | 89812850 | 901-Lng-C-T  | 29   | chr7:89812750-89812850 |
| chr7 | 89937650 | 89937750 | 846-Lng-A-T  | 1218 | chr7:89937650-89937750 |
| chr7 | 89953550 | 89953650 | 1004-Lng-A-T | 63   | chr7:89953550-89953650 |
| chr7 | 90117050 | 90117150 | 901-Lng-C-T  | 248  | chr7:90117050-90117150 |
| chr7 | 90219350 | 90219450 | 1152-Lng-A-T | 295  | chr7:90219350-90219450 |
| chr7 | 90389950 | 90390050 | 1167-Lng-A-T | 93   | chr7:90389950-90390050 |
| chr7 | 90487350 | 90487450 | 1152-Lng-A-T | 75   | chr7:90487350-90487450 |
| chr7 | 90513550 | 90513650 | 1188-Lng-A-T | 106  | chr7:90513550-90513650 |
| chr7 | 90785350 | 90785450 | 1151-Lng-A-T | 200  | chr7:90785350-90785450 |
| chr7 | 90988950 | 90989050 | 901-Lng-A-T  | 382  | chr7:90988950-90989050 |
| chr7 | 91044750 | 91044850 | 1223-Lng-C-T | 50   | chr7:91044750-91044850 |
| chr7 | 91068750 | 91068850 | 1167-Lng-A-T | 363  | chr7:91068750-91068850 |
| chr7 | 91274650 | 91274750 | 1090-Lng-A-T | 98   | chr7:91274650-91274750 |
| chr7 | 91276350 | 91276450 | 1274-Lng-A-T | 78   | chr7:91276350-91276450 |
| chr7 | 91293050 | 91293150 | 1065-Lng-A-T | 79   | chr7:91293050-91293150 |
| chr7 | 91427650 | 91427750 | 901-Lng-A-T  | 439  | chr7:91427650-91427750 |
| chr7 | 91692950 | 91693050 | 1072-Lng-A-T | 119  | chr7:91692950-91693050 |
| chr7 | 91714350 | 91714450 | 1167-Lng-A-T | 52   | chr7:91714350-91714450 |
| chr7 | 91768150 | 91768250 | 901-Lng-C-T  | 44   | chr7:91768150-91768250 |
| chr7 | 91792450 | 91792550 | 901-Lng-C-T  | 66   | chr7:91792450-91792550 |
| chr7 | 92287650 | 92287750 | 1065-Lng-B-T | 58   | chr7:92287650-92287750 |
| chr7 | 92298950 | 92299050 | 1223-Lng-B-T | 39   | chr7:92298950-92299050 |
| chr7 | 92737450 | 92737550 | 1090-Lng-A-T | 111  | chr7:92737450-92737550 |
| chr7 | 92863050 | 92863150 | 901-Lng-B-T  | 120  | chr7:92863050-92863150 |
| chr7 | 93101350 | 93101450 | 1065-Lng-B-T | 42   | chr7:93101350-93101450 |
| chr7 | 93128550 | 93128650 | 901-Lng-C-T  | 29   | chr7:93128550-93128650 |
| chr7 | 93378850 | 93378950 | 1274-Lng-A-T | 87   | chr7:93378850-93378950 |
| chr7 | 93445650 | 93445750 | 846-Lng-A-T  | 90   | chr7:93445650-93445750 |

**Table S2: SB Insertion regions**

|      |          |          |              |      |                        |
|------|----------|----------|--------------|------|------------------------|
| chr7 | 93552850 | 93552950 | 1004-Lng-A-T | 98   | chr7:93552850-93552950 |
| chr7 | 93610250 | 93610350 | 901-Lng-B-T  | 173  | chr7:93610250-93610350 |
| chr7 | 93783150 | 93783250 | 846-Lng-A-T  | 167  | chr7:93783150-93783250 |
| chr7 | 93809350 | 93809450 | 1072-Lng-A-T | 256  | chr7:93809350-93809450 |
| chr7 | 93865450 | 93865550 | 1004-Lng-A-T | 118  | chr7:93865450-93865550 |
| chr7 | 94015750 | 94015850 | 901-Lng-D-T  | 380  | chr7:94015750-94015850 |
| chr7 | 94045950 | 94046050 | 1152-Lng-A-T | 151  | chr7:94045950-94046050 |
| chr7 | 94196050 | 94196150 | 1065-Lng-A-T | 52   | chr7:94196050-94196150 |
| chr7 | 94317850 | 94317950 | 1065-Lng-B-T | 71   | chr7:94317850-94317950 |
| chr7 | 94468550 | 94468650 | 1090-Lng-A-T | 85   | chr7:94468550-94468650 |
| chr7 | 94648350 | 94648450 | 1072-Lng-A-T | 86   | chr7:94648350-94648450 |
| chr7 | 94988750 | 94988850 | 901-Lng-B-T  | 281  | chr7:94988750-94988850 |
| chr7 | 95172750 | 95172850 | 1152-Lng-A-T | 38   | chr7:95172750-95172850 |
| chr7 | 95216950 | 95217050 | 1167-Lng-A-T | 94   | chr7:95216950-95217050 |
| chr7 | 95460350 | 95460450 | 1223-Lng-C-T | 83   | chr7:95460350-95460450 |
| chr7 | 95471750 | 95471850 | 1223-Lng-C-T | 71   | chr7:95471750-95471850 |
| chr7 | 95618050 | 95618150 | 1065-Lng-A-T | 80   | chr7:95618050-95618150 |
| chr7 | 95631450 | 95631550 | 1004-Lng-A-T | 127  | chr7:95631450-95631550 |
| chr7 | 95693050 | 95693150 | 1065-Lng-B-T | 41   | chr7:95693050-95693150 |
| chr7 | 95698150 | 95698250 | 1090-Lng-A-T | 74   | chr7:95698150-95698250 |
| chr7 | 95997050 | 95997150 | 901-Lng-B-T  | 208  | chr7:95997050-95997150 |
| chr7 | 96001150 | 96001250 | 1065-Lng-B-T | 301  | chr7:96001150-96001250 |
| chr7 | 96081450 | 96081550 | 1274-Lng-A-T | 59   | chr7:96081450-96081550 |
| chr7 | 96210850 | 96210950 | 1004-Lng-A-T | 53   | chr7:96210850-96210950 |
| chr7 | 96280350 | 96280450 | 901-Lng-D-T  | 263  | chr7:96280350-96280450 |
| chr7 | 96301450 | 96301550 | 1152-Lng-A-T | 58   | chr7:96301450-96301550 |
| chr7 | 96301750 | 96301850 | 1004-Lng-A-T | 72   | chr7:96301750-96301850 |
| chr7 | 96313250 | 96313350 | 901-Lng-D-T  | 349  | chr7:96313250-96313350 |
| chr7 | 96322150 | 96322250 | 1065-Lng-A-T | 34   | chr7:96322150-96322250 |
| chr7 | 96358650 | 96358750 | 1223-Lng-A-T | 73   | chr7:96358650-96358750 |
| chr7 | 96411050 | 96411150 | 901-Lng-C-T  | 89   | chr7:96411050-96411150 |
| chr7 | 96455050 | 96455150 | 1065-Lng-A-T | 103  | chr7:96455050-96455150 |
| chr7 | 96474350 | 96474450 | 1065-Lng-B-T | 146  | chr7:96474350-96474450 |
| chr7 | 96541150 | 96541250 | 846-Lng-A-T  | 104  | chr7:96541150-96541250 |
| chr7 | 96583350 | 96583450 | 1072-Lng-A-T | 166  | chr7:96583350-96583450 |
| chr7 | 96948750 | 96948850 | 901-Lng-B-T  | 291  | chr7:96948750-96948850 |
| chr7 | 96960450 | 96960550 | 1090-Lng-B-T | 727  | chr7:96960450-96960550 |
| chr7 | 96964950 | 96965050 | 901-Lng-B-T  | 161  | chr7:96964950-96965050 |
| chr7 | 97021350 | 97021450 | 1223-Lng-A-T | 54   | chr7:97021350-97021450 |
| chr7 | 97107550 | 97107650 | 1152-Lng-A-T | 62   | chr7:97107550-97107650 |
| chr7 | 97109150 | 97109250 | 901-Lng-A-T  | 58   | chr7:97109150-97109250 |
| chr7 | 97172250 | 97172350 | 1100-Lng-A-T | 363  | chr7:97172250-97172350 |
| chr7 | 97235650 | 97235750 | 1274-Lng-A-T | 119  | chr7:97235650-97235750 |
| chr7 | 97326650 | 97326750 | 901-Lng-C-T  | 35   | chr7:97326650-97326750 |
| chr7 | 97330150 | 97330250 | 1065-Lng-C-T | 2722 | chr7:97330150-97330250 |
| chr7 | 97341150 | 97341250 | 1188-Lng-A-T | 105  | chr7:97341150-97341250 |

**Table S2: SB Insertion regions**

|      |           |           |              |      |                          |
|------|-----------|-----------|--------------|------|--------------------------|
| chr7 | 97343550  | 97343650  | 1167-Lng-A-T | 115  | chr7:97343550-97343650   |
| chr7 | 97430050  | 97430150  | 901-Lng-B-T  | 115  | chr7:97430050-97430150   |
| chr7 | 97479350  | 97479450  | 846-Lng-A-T  | 57   | chr7:97479350-97479450   |
| chr7 | 97496950  | 97497050  | 1004-Lng-A-T | 59   | chr7:97496950-97497050   |
| chr7 | 97598150  | 97598250  | 1065-Lng-A-T | 96   | chr7:97598150-97598250   |
| chr7 | 97618550  | 97618650  | 1065-Lng-A-T | 46   | chr7:97618550-97618650   |
| chr7 | 97755650  | 97755750  | 846-Lng-A-T  | 498  | chr7:97755650-97755750   |
| chr7 | 98176550  | 98176650  | 1152-Lng-A-T | 78   | chr7:98176550-98176650   |
| chr7 | 98373750  | 98373850  | 1004-Lng-A-T | 766  | chr7:98373750-98373850   |
| chr7 | 98403450  | 98403550  | 1004-Lng-A-T | 65   | chr7:98403450-98403550   |
| chr7 | 98435250  | 98435350  | 1065-Lng-B-T | 44   | chr7:98435250-98435350   |
| chr7 | 98553450  | 98553550  | 901-Lng-C-T  | 51   | chr7:98553450-98553550   |
| chr7 | 98579950  | 98580050  | 1004-Lng-A-T | 99   | chr7:98579950-98580050   |
| chr7 | 98589550  | 98589650  | 1188-Lng-A-T | 43   | chr7:98589550-98589650   |
| chr7 | 98716850  | 98716950  | 901-Lng-A-T  | 65   | chr7:98716850-98716950   |
| chr7 | 99021350  | 99021450  | 1223-Lng-C-T | 54   | chr7:99021350-99021450   |
| chr7 | 99187350  | 99187450  | 901-Lng-C-T  | 141  | chr7:99187350-99187450   |
| chr7 | 99245850  | 99245950  | 1223-Lng-D-T | 56   | chr7:99245850-99245950   |
| chr7 | 99264450  | 99264550  | 1065-Lng-C-T | 277  | chr7:99264450-99264550   |
| chr7 | 99279550  | 99279650  | 1100-Lng-A-T | 92   | chr7:99279550-99279650   |
| chr7 | 99316950  | 99317050  | 1151-Lng-A-T | 63   | chr7:99316950-99317050   |
| chr7 | 99538450  | 99538550  | 1274-Lng-A-T | 53   | chr7:99538450-99538550   |
| chr7 | 99596950  | 99597050  | 1065-Lng-B-T | 58   | chr7:99596950-99597050   |
| chr7 | 99673750  | 99673850  | 1072-Lng-A-T | 69   | chr7:99673750-99673850   |
| chr7 | 99733650  | 99733750  | 1065-Lng-B-T | 69   | chr7:99733650-99733750   |
| chr7 | 99800150  | 99800250  | 1072-Lng-A-T | 52   | chr7:99800150-99800250   |
| chr7 | 99810050  | 99810150  | 1274-Lng-A-T | 92   | chr7:99810050-99810150   |
| chr7 | 99812750  | 99812850  | 1223-Lng-A-T | 69   | chr7:99812750-99812850   |
| chr7 | 99814150  | 99814250  | 1072-Lng-A-T | 154  | chr7:99814150-99814250   |
| chr7 | 99879750  | 99879850  | 1223-Lng-B-T | 50   | chr7:99879750-99879850   |
| chr7 | 99981050  | 99981150  | 1090-Lng-B-T | 974  | chr7:99981050-99981150   |
| chr7 | 100000050 | 100000150 | 1090-Lng-A-T | 50   | chr7:100000050-100000150 |
| chr7 | 100066450 | 100066550 | 1004-Lng-A-T | 50   | chr7:100066450-100066550 |
| chr7 | 100641050 | 100641150 | 1223-Lng-C-T | 50   | chr7:100641050-100641150 |
| chr7 | 100718150 | 100718250 | 1004-Lng-A-T | 72   | chr7:100718150-100718250 |
| chr7 | 100741950 | 100742050 | 1223-Lng-A-T | 1675 | chr7:100741950-100742050 |
| chr7 | 100890050 | 100890150 | 1065-Lng-C-T | 66   | chr7:100890050-100890150 |
| chr7 | 101062950 | 101063050 | 1223-Lng-D-T | 48   | chr7:101062950-101063050 |
| chr7 | 101188750 | 101188850 | 1223-Lng-D-T | 51   | chr7:101188750-101188850 |
| chr7 | 101199850 | 101199950 | 1223-Lng-A-T | 200  | chr7:101199850-101199950 |
| chr7 | 101236450 | 101236550 | 1072-Lng-A-T | 109  | chr7:101236450-101236550 |
| chr7 | 101314850 | 101314950 | 1223-Lng-B-T | 37   | chr7:101314850-101314950 |
| chr7 | 101395550 | 101395650 | 1065-Lng-A-T | 69   | chr7:101395550-101395650 |
| chr7 | 101596850 | 101596950 | 1065-Lng-B-T | 77   | chr7:101596850-101596950 |
| chr7 | 101762450 | 101762550 | 1152-Lng-A-T | 76   | chr7:101762450-101762550 |
| chr7 | 101865950 | 101866050 | 1065-Lng-B-T | 77   | chr7:101865950-101866050 |

**Table S2: SB Insertion regions**

|      |           |           |              |     |                          |
|------|-----------|-----------|--------------|-----|--------------------------|
| chr7 | 101875650 | 101875750 | 1151-Lng-A-T | 113 | chr7:101875650-101875750 |
| chr7 | 101898150 | 101898250 | 1100-Lng-A-T | 53  | chr7:101898150-101898250 |
| chr7 | 101955750 | 101955850 | 1004-Lng-A-T | 310 | chr7:101955750-101955850 |
| chr7 | 101958450 | 101958550 | 901-Lng-B-T  | 203 | chr7:101958450-101958550 |
| chr7 | 101965750 | 101965850 | 1065-Lng-C-T | 104 | chr7:101965750-101965850 |
| chr7 | 102018850 | 102018950 | 1004-Lng-A-T | 88  | chr7:102018850-102018950 |
| chr7 | 102091650 | 102091750 | 1065-Lng-A-T | 73  | chr7:102091650-102091750 |
| chr7 | 102148550 | 102148650 | 1004-Lng-A-T | 69  | chr7:102148550-102148650 |
| chr7 | 102162450 | 102162550 | 1090-Lng-A-T | 84  | chr7:102162450-102162550 |
| chr7 | 102343950 | 102344050 | 1152-Lng-A-T | 40  | chr7:102343950-102344050 |
| chr7 | 102519150 | 102519250 | 1072-Lng-A-T | 97  | chr7:102519150-102519250 |
| chr7 | 102568650 | 102568750 | 1274-Lng-A-T | 65  | chr7:102568650-102568750 |
| chr7 | 102710850 | 102710950 | 1090-Lng-B-T | 201 | chr7:102710850-102710950 |
| chr7 | 102881850 | 102881950 | 901-Lng-B-T  | 122 | chr7:102881850-102881950 |
| chr7 | 102883950 | 102884050 | 1223-Lng-A-T | 82  | chr7:102883950-102884050 |
| chr7 | 102940150 | 102940250 | 1072-Lng-A-T | 119 | chr7:102940150-102940250 |
| chr7 | 103009050 | 103009150 | 1090-Lng-A-T | 70  | chr7:103009050-103009150 |
| chr7 | 103045350 | 103045450 | 1065-Lng-B-T | 80  | chr7:103045350-103045450 |
| chr7 | 103058350 | 103058450 | 901-Lng-A-T  | 72  | chr7:103058350-103058450 |
| chr7 | 103558950 | 103559050 | 1004-Lng-A-T | 73  | chr7:103558950-103559050 |
| chr7 | 103565050 | 103565150 | 901-Lng-D-T  | 494 | chr7:103565050-103565150 |
| chr7 | 103759950 | 103760050 | 1065-Lng-C-T | 79  | chr7:103759950-103760050 |
| chr7 | 103972050 | 103972150 | 1152-Lng-A-T | 96  | chr7:103972050-103972150 |
| chr7 | 104151050 | 104151150 | 901-Lng-D-T  | 472 | chr7:104151050-104151150 |
| chr7 | 104192650 | 104192750 | 1090-Lng-B-T | 597 | chr7:104192650-104192750 |
| chr7 | 104213950 | 104214050 | 1274-Lng-A-T | 164 | chr7:104213950-104214050 |
| chr7 | 104228450 | 104228550 | 1223-Lng-B-T | 39  | chr7:104228450-104228550 |
| chr7 | 104247050 | 104247150 | 1004-Lng-A-T | 98  | chr7:104247050-104247150 |
| chr7 | 104253050 | 104253150 | 1090-Lng-A-T | 235 | chr7:104253050-104253150 |
| chr7 | 104287150 | 104287250 | 1100-Lng-A-T | 77  | chr7:104287150-104287250 |
| chr7 | 104301350 | 104301450 | 901-Lng-B-T  | 111 | chr7:104301350-104301450 |
| chr7 | 104302950 | 104303050 | 1167-Lng-A-T | 161 | chr7:104302950-104303050 |
| chr7 | 104306250 | 104306350 | 901-Lng-B-T  | 45  | chr7:104306250-104306350 |
| chr7 | 104312750 | 104312850 | 1151-Lng-A-T | 56  | chr7:104312750-104312850 |
| chr7 | 104331150 | 104331250 | 901-Lng-B-T  | 65  | chr7:104331150-104331250 |
| chr7 | 104341850 | 104341950 | 1065-Lng-A-T | 69  | chr7:104341850-104341950 |
| chr7 | 104371150 | 104371250 | 1223-Lng-C-T | 46  | chr7:104371150-104371250 |
| chr7 | 104404350 | 104404450 | 1167-Lng-A-T | 90  | chr7:104404350-104404450 |
| chr7 | 104433850 | 104433950 | 1004-Lng-A-T | 49  | chr7:104433850-104433950 |
| chr7 | 104492450 | 104492550 | 1004-Lng-A-T | 70  | chr7:104492450-104492550 |
| chr7 | 104568750 | 104568850 | 1274-Lng-A-T | 86  | chr7:104568750-104568850 |
| chr7 | 104736150 | 104736250 | 1100-Lng-A-T | 56  | chr7:104736150-104736250 |
| chr7 | 104736650 | 104736750 | 1167-Lng-A-T | 52  | chr7:104736650-104736750 |
| chr7 | 104764550 | 104764650 | 1167-Lng-A-T | 80  | chr7:104764550-104764650 |
| chr7 | 104784750 | 104784850 | 901-Lng-C-T  | 45  | chr7:104784750-104784850 |
| chr7 | 104825750 | 104825850 | 1223-Lng-D-T | 208 | chr7:104825750-104825850 |



**Table S2: SB Insertion regions**

|      |           |           |              |     |                          |
|------|-----------|-----------|--------------|-----|--------------------------|
| chr7 | 104857150 | 104857250 | 901-Lng-A-T  | 420 | chr7:104857150-104857250 |
| chr7 | 104887350 | 104887450 | 1188-Lng-A-T | 72  | chr7:104887350-104887450 |
| chr7 | 105004450 | 105004550 | 1065-Lng-B-T | 88  | chr7:105004450-105004550 |
| chr7 | 105033050 | 105033150 | 1188-Lng-A-T | 108 | chr7:105033050-105033150 |
| chr7 | 105036950 | 105037050 | 1188-Lng-A-T | 262 | chr7:105036950-105037050 |
| chr7 | 105147550 | 105147650 | 1223-Lng-C-T | 43  | chr7:105147550-105147650 |
| chr7 | 105285250 | 105285350 | 1100-Lng-A-T | 63  | chr7:105285250-105285350 |
| chr7 | 105334250 | 105334350 | 1274-Lng-A-T | 59  | chr7:105334250-105334350 |
| chr7 | 105361650 | 105361750 | 1065-Lng-B-T | 477 | chr7:105361650-105361750 |
| chr7 | 105402550 | 105402650 | 1167-Lng-A-T | 66  | chr7:105402550-105402650 |
| chr7 | 105412050 | 105412150 | 1100-Lng-A-T | 143 | chr7:105412050-105412150 |
| chr7 | 105725550 | 105725650 | 1274-Lng-A-T | 74  | chr7:105725550-105725650 |
| chr7 | 105737250 | 105737350 | 1100-Lng-A-T | 66  | chr7:105737250-105737350 |
| chr7 | 105741250 | 105741350 | 1100-Lng-A-T | 53  | chr7:105741250-105741350 |
| chr7 | 105780850 | 105780950 | 1274-Lng-A-T | 260 | chr7:105780850-105780950 |
| chr7 | 105792050 | 105792150 | 901-Lng-C-T  | 55  | chr7:105792050-105792150 |
| chr7 | 105839350 | 105839450 | 1152-Lng-A-T | 109 | chr7:105839350-105839450 |
| chr7 | 105870950 | 105871050 | 1274-Lng-A-T | 128 | chr7:105870950-105871050 |
| chr7 | 106028350 | 106028450 | 1065-Lng-B-T | 39  | chr7:106028350-106028450 |
| chr7 | 106088950 | 106089050 | 1004-Lng-A-T | 307 | chr7:106088950-106089050 |
| chr7 | 106145250 | 106145350 | 1100-Lng-A-T | 156 | chr7:106145250-106145350 |
| chr7 | 106150250 | 106150350 | 1100-Lng-A-T | 631 | chr7:106150250-106150350 |
| chr7 | 106161250 | 106161350 | 1223-Lng-A-T | 53  | chr7:106161250-106161350 |
| chr7 | 106217850 | 106217950 | 901-Lng-D-T  | 186 | chr7:106217850-106217950 |
| chr7 | 106232650 | 106232750 | 1274-Lng-A-T | 60  | chr7:106232650-106232750 |
| chr7 | 106475250 | 106475350 | 901-Lng-A-T  | 159 | chr7:106475250-106475350 |
| chr7 | 106625450 | 106625550 | 1065-Lng-B-T | 73  | chr7:106625450-106625550 |
| chr7 | 106628250 | 106628350 | 1223-Lng-A-T | 69  | chr7:106628250-106628350 |
| chr7 | 106861350 | 106861450 | 1004-Lng-A-T | 73  | chr7:106861350-106861450 |
| chr7 | 106866850 | 106866950 | 901-Lng-A-T  | 111 | chr7:106866850-106866950 |
| chr7 | 107038250 | 107038350 | 1274-Lng-A-T | 151 | chr7:107038250-107038350 |
| chr7 | 107079850 | 107079950 | 1072-Lng-A-T | 70  | chr7:107079850-107079950 |
| chr7 | 107224350 | 107224450 | 901-Lng-D-T  | 76  | chr7:107224350-107224450 |
| chr7 | 107509550 | 107509650 | 1100-Lng-A-T | 120 | chr7:107509550-107509650 |
| chr7 | 107528750 | 107528850 | 1065-Lng-C-T | 67  | chr7:107528750-107528850 |
| chr7 | 107764050 | 107764150 | 1152-Lng-A-T | 71  | chr7:107764050-107764150 |
| chr7 | 107786550 | 107786650 | 846-Lng-A-T  | 112 | chr7:107786550-107786650 |
| chr7 | 107800850 | 107800950 | 1223-Lng-D-T | 44  | chr7:107800850-107800950 |
| chr7 | 107858450 | 107858550 | 1223-Lng-B-T | 95  | chr7:107858450-107858550 |
| chr7 | 107864550 | 107864650 | 901-Lng-A-T  | 84  | chr7:107864550-107864650 |
| chr7 | 107945050 | 107945150 | 1090-Lng-B-T | 459 | chr7:107945050-107945150 |
| chr7 | 107956350 | 107956450 | 1151-Lng-A-T | 279 | chr7:107956350-107956450 |
| chr7 | 107966550 | 107966650 | 1072-Lng-A-T | 145 | chr7:107966550-107966650 |
| chr7 | 108071750 | 108071850 | 1188-Lng-A-T | 102 | chr7:108071750-108071850 |
| chr7 | 108224250 | 108224350 | 1188-Lng-A-T | 173 | chr7:108224250-108224350 |
| chr7 | 108271450 | 108271550 | 1274-Lng-A-T | 52  | chr7:108271450-108271550 |

**Table S2: SB Insertion regions**

|      |           |           |              |      |                          |
|------|-----------|-----------|--------------|------|--------------------------|
| chr7 | 108293450 | 108293550 | 1065-Lng-C-T | 74   | chr7:108293450-108293550 |
| chr7 | 108411750 | 108411850 | 1223-Lng-C-T | 83   | chr7:108411750-108411850 |
| chr7 | 108427150 | 108427250 | 1188-Lng-A-T | 39   | chr7:108427150-108427250 |
| chr7 | 108444450 | 108444550 | 901-Lng-C-T  | 41   | chr7:108444450-108444550 |
| chr7 | 108466950 | 108467050 | 1274-Lng-A-T | 74   | chr7:108466950-108467050 |
| chr7 | 108759450 | 108759550 | 1090-Lng-B-T | 1061 | chr7:108759450-108759550 |
| chr7 | 108897750 | 108897850 | 1223-Lng-B-T | 56   | chr7:108897750-108897850 |
| chr7 | 108903950 | 108904050 | 1223-Lng-B-T | 445  | chr7:108903950-108904050 |
| chr7 | 108987850 | 108987950 | 1072-Lng-A-T | 1220 | chr7:108987850-108987950 |
| chr7 | 109153050 | 109153150 | 1004-Lng-A-T | 157  | chr7:109153050-109153150 |
| chr7 | 109190050 | 109190150 | 901-Lng-B-T  | 185  | chr7:109190050-109190150 |
| chr7 | 109275050 | 109275150 | 1004-Lng-A-T | 103  | chr7:109275050-109275150 |
| chr7 | 109346950 | 109347050 | 901-Lng-B-T  | 332  | chr7:109346950-109347050 |
| chr7 | 109440950 | 109441050 | 1223-Lng-B-T | 40   | chr7:109440950-109441050 |
| chr7 | 109466450 | 109466550 | 1223-Lng-C-T | 56   | chr7:109466450-109466550 |
| chr7 | 109474650 | 109474750 | 1072-Lng-A-T | 106  | chr7:109474650-109474750 |
| chr7 | 109537850 | 109537950 | 901-Lng-D-T  | 94   | chr7:109537850-109537950 |
| chr7 | 109686250 | 109686350 | 901-Lng-C-T  | 65   | chr7:109686250-109686350 |
| chr7 | 109741250 | 109741350 | 1065-Lng-B-T | 73   | chr7:109741250-109741350 |
| chr7 | 109820250 | 109820350 | 901-Lng-C-T  | 127  | chr7:109820250-109820350 |
| chr7 | 109896150 | 109896250 | 1090-Lng-A-T | 123  | chr7:109896150-109896250 |
| chr7 | 110049850 | 110049950 | 1072-Lng-A-T | 203  | chr7:110049850-110049950 |
| chr7 | 110288550 | 110288650 | 1004-Lng-A-T | 100  | chr7:110288550-110288650 |
| chr7 | 110415350 | 110415450 | 1065-Lng-A-T | 84   | chr7:110415350-110415450 |
| chr7 | 110647350 | 110647450 | 901-Lng-B-T  | 255  | chr7:110647350-110647450 |
| chr7 | 110737850 | 110737950 | 1065-Lng-A-T | 383  | chr7:110737850-110737950 |
| chr7 | 110819550 | 110819650 | 1223-Lng-A-T | 85   | chr7:110819550-110819650 |
| chr7 | 110820750 | 110820850 | 901-Lng-A-T  | 102  | chr7:110820750-110820850 |
| chr7 | 110833150 | 110833250 | 1004-Lng-A-T | 70   | chr7:110833150-110833250 |
| chr7 | 111122350 | 111122450 | 1090-Lng-B-T | 385  | chr7:111122350-111122450 |
| chr7 | 111184450 | 111184550 | 1004-Lng-A-T | 52   | chr7:111184450-111184550 |
| chr7 | 111237650 | 111237750 | 901-Lng-D-T  | 76   | chr7:111237650-111237750 |
| chr7 | 111288050 | 111288150 | 1072-Lng-A-T | 49   | chr7:111288050-111288150 |
| chr7 | 111393550 | 111393650 | 1223-Lng-A-T | 158  | chr7:111393550-111393650 |
| chr7 | 111735850 | 111735950 | 1152-Lng-A-T | 137  | chr7:111735850-111735950 |
| chr7 | 111769350 | 111769450 | 1004-Lng-A-T | 112  | chr7:111769350-111769450 |
| chr7 | 111774650 | 111774750 | 1090-Lng-B-T | 703  | chr7:111774650-111774750 |
| chr7 | 111774650 | 111774750 | 1065-Lng-B-T | 58   | chr7:111774650-111774750 |
| chr7 | 111825350 | 111825450 | 1072-Lng-A-T | 124  | chr7:111825350-111825450 |
| chr7 | 112015550 | 112015650 | 1065-Lng-C-T | 102  | chr7:112015550-112015650 |
| chr7 | 112316550 | 112316650 | 901-Lng-B-T  | 123  | chr7:112316550-112316650 |
| chr7 | 112368050 | 112368150 | 1274-Lng-A-T | 86   | chr7:112368050-112368150 |
| chr7 | 112589150 | 112589250 | 1223-Lng-A-T | 2219 | chr7:112589150-112589250 |
| chr7 | 112681650 | 112681750 | 1065-Lng-A-T | 566  | chr7:112681650-112681750 |
| chr7 | 112683950 | 112684050 | 1004-Lng-A-T | 59   | chr7:112683950-112684050 |
| chr7 | 112855450 | 112855550 | 1223-Lng-B-T | 43   | chr7:112855450-112855550 |

**Table S2: SB Insertion regions**

|      |           |           |              |      |                          |
|------|-----------|-----------|--------------|------|--------------------------|
| chr7 | 112957450 | 112957550 | 901-Lng-B-T  | 55   | chr7:112957450-112957550 |
| chr7 | 113392150 | 113392250 | 901-Lng-A-T  | 60   | chr7:113392150-113392250 |
| chr7 | 113406750 | 113406850 | 1004-Lng-A-T | 53   | chr7:113406750-113406850 |
| chr7 | 114023450 | 114023550 | 1065-Lng-A-T | 61   | chr7:114023450-114023550 |
| chr7 | 114415650 | 114415750 | 1090-Lng-A-T | 176  | chr7:114415650-114415750 |
| chr7 | 114453350 | 114453450 | 901-Lng-A-T  | 193  | chr7:114453350-114453450 |
| chr7 | 114483450 | 114483550 | 1152-Lng-A-T | 83   | chr7:114483450-114483550 |
| chr7 | 114532250 | 114532350 | 1065-Lng-A-T | 50   | chr7:114532250-114532350 |
| chr7 | 114659950 | 114660050 | 1004-Lng-A-T | 60   | chr7:114659950-114660050 |
| chr7 | 114670950 | 114671050 | 1065-Lng-C-T | 793  | chr7:114670950-114671050 |
| chr7 | 114748850 | 114748950 | 1274-Lng-A-T | 158  | chr7:114748850-114748950 |
| chr7 | 114766450 | 114766550 | 901-Lng-A-T  | 218  | chr7:114766450-114766550 |
| chr7 | 114831850 | 114831950 | 1223-Lng-A-T | 462  | chr7:114831850-114831950 |
| chr7 | 114971250 | 114971350 | 1223-Lng-B-T | 38   | chr7:114971250-114971350 |
| chr7 | 115266250 | 115266350 | 1065-Lng-A-T | 61   | chr7:115266250-115266350 |
| chr7 | 115299450 | 115299550 | 846-Lng-A-T  | 43   | chr7:115299450-115299550 |
| chr7 | 115356850 | 115356950 | 1072-Lng-A-T | 50   | chr7:115356850-115356950 |
| chr7 | 115388250 | 115388350 | 1151-Lng-A-T | 83   | chr7:115388250-115388350 |
| chr7 | 115444250 | 115444350 | 1152-Lng-A-T | 40   | chr7:115444250-115444350 |
| chr7 | 115892550 | 115892650 | 901-Lng-A-T  | 299  | chr7:115892550-115892650 |
| chr7 | 116084550 | 116084650 | 1090-Lng-A-T | 77   | chr7:116084550-116084650 |
| chr7 | 116089450 | 116089550 | 1167-Lng-A-T | 47   | chr7:116089450-116089550 |
| chr7 | 116197050 | 116197150 | 901-Lng-D-T  | 39   | chr7:116197050-116197150 |
| chr7 | 116420050 | 116420150 | 1072-Lng-A-T | 86   | chr7:116420050-116420150 |
| chr7 | 116534150 | 116534250 | 1004-Lng-A-T | 78   | chr7:116534150-116534250 |
| chr7 | 116724650 | 116724750 | 1274-Lng-A-T | 167  | chr7:116724650-116724750 |
| chr7 | 116735050 | 116735150 | 901-Lng-C-T  | 80   | chr7:116735050-116735150 |
| chr7 | 116740950 | 116741050 | 1223-Lng-C-T | 45   | chr7:116740950-116741050 |
| chr7 | 116786650 | 116786750 | 901-Lng-C-T  | 174  | chr7:116786650-116786750 |
| chr7 | 117055250 | 117055350 | 1151-Lng-A-T | 70   | chr7:117055250-117055350 |
| chr7 | 117083450 | 117083550 | 1004-Lng-A-T | 83   | chr7:117083450-117083550 |
| chr7 | 117140650 | 117140750 | 1274-Lng-A-T | 56   | chr7:117140650-117140750 |
| chr7 | 117184950 | 117185050 | 1090-Lng-A-T | 77   | chr7:117184950-117185050 |
| chr7 | 117250950 | 117251050 | 1223-Lng-A-T | 1001 | chr7:117250950-117251050 |
| chr7 | 117460250 | 117460350 | 1223-Lng-C-T | 46   | chr7:117460250-117460350 |
| chr7 | 117664250 | 117664350 | 1188-Lng-A-T | 73   | chr7:117664250-117664350 |
| chr7 | 117666250 | 117666350 | 901-Lng-A-T  | 72   | chr7:117666250-117666350 |
| chr7 | 117740150 | 117740250 | 1188-Lng-A-T | 48   | chr7:117740150-117740250 |
| chr7 | 117861350 | 117861450 | 1090-Lng-A-T | 67   | chr7:117861350-117861450 |
| chr7 | 118185750 | 118185850 | 1100-Lng-A-T | 71   | chr7:118185750-118185850 |
| chr7 | 118222650 | 118222750 | 1223-Lng-A-T | 57   | chr7:118222650-118222750 |
| chr7 | 118304850 | 118304950 | 1065-Lng-B-T | 44   | chr7:118304850-118304950 |
| chr7 | 118581850 | 118581950 | 1274-Lng-A-T | 61   | chr7:118581850-118581950 |
| chr7 | 118782050 | 118782150 | 1223-Lng-D-T | 61   | chr7:118782050-118782150 |
| chr7 | 118806150 | 118806250 | 901-Lng-B-T  | 77   | chr7:118806150-118806250 |
| chr7 | 118827150 | 118827250 | 1152-Lng-A-T | 59   | chr7:118827150-118827250 |

**Table S2: SB Insertion regions**

|      |           |           |              |      |                          |
|------|-----------|-----------|--------------|------|--------------------------|
| chr7 | 118862750 | 118862850 | 1274-Lng-A-T | 92   | chr7:118862750-118862850 |
| chr7 | 118938850 | 118938950 | 901-Lng-D-T  | 215  | chr7:118938850-118938950 |
| chr7 | 118938950 | 118939050 | 1065-Lng-A-T | 42   | chr7:118938950-118939050 |
| chr7 | 119118150 | 119118250 | 1152-Lng-A-T | 53   | chr7:119118150-119118250 |
| chr7 | 119189350 | 119189450 | 1100-Lng-A-T | 106  | chr7:119189350-119189450 |
| chr7 | 119204850 | 119204950 | 846-Lng-A-T  | 216  | chr7:119204850-119204950 |
| chr7 | 119212550 | 119212650 | 1004-Lng-A-T | 97   | chr7:119212550-119212650 |
| chr7 | 119239050 | 119239150 | 1223-Lng-B-T | 72   | chr7:119239050-119239150 |
| chr7 | 119408450 | 119408550 | 1223-Lng-D-T | 51   | chr7:119408450-119408550 |
| chr7 | 119544450 | 119544550 | 1223-Lng-C-T | 54   | chr7:119544450-119544550 |
| chr7 | 119875850 | 119875950 | 901-Lng-D-T  | 127  | chr7:119875850-119875950 |
| chr7 | 119879850 | 119879950 | 901-Lng-C-T  | 125  | chr7:119879850-119879950 |
| chr7 | 119958150 | 119958250 | 1223-Lng-C-T | 353  | chr7:119958150-119958250 |
| chr7 | 120031750 | 120031850 | 1223-Lng-A-T | 60   | chr7:120031750-120031850 |
| chr7 | 120201350 | 120201450 | 1274-Lng-A-T | 53   | chr7:120201350-120201450 |
| chr7 | 120211550 | 120211650 | 901-Lng-D-T  | 303  | chr7:120211550-120211650 |
| chr7 | 120340250 | 120340350 | 1274-Lng-A-T | 53   | chr7:120340250-120340350 |
| chr7 | 120366750 | 120366850 | 1274-Lng-A-T | 67   | chr7:120366750-120366850 |
| chr7 | 120380350 | 120380450 | 1090-Lng-A-T | 45   | chr7:120380350-120380450 |
| chr7 | 120435350 | 120435450 | 901-Lng-C-T  | 32   | chr7:120435350-120435450 |
| chr7 | 120452250 | 120452350 | 1274-Lng-A-T | 60   | chr7:120452250-120452350 |
| chr7 | 120509350 | 120509450 | 1167-Lng-A-T | 49   | chr7:120509350-120509450 |
| chr7 | 121105650 | 121105750 | 1274-Lng-A-T | 92   | chr7:121105650-121105750 |
| chr7 | 121221450 | 121221550 | 1223-Lng-A-T | 262  | chr7:121221450-121221550 |
| chr7 | 121332650 | 121332750 | 1223-Lng-A-T | 53   | chr7:121332650-121332750 |
| chr7 | 121625950 | 121626050 | 1223-Lng-C-T | 55   | chr7:121625950-121626050 |
| chr7 | 121816450 | 121816550 | 1072-Lng-A-T | 138  | chr7:121816450-121816550 |
| chr7 | 121819550 | 121819650 | 1090-Lng-A-T | 74   | chr7:121819550-121819650 |
| chr7 | 122098250 | 122098350 | 846-Lng-A-T  | 147  | chr7:122098250-122098350 |
| chr7 | 122194150 | 122194250 | 1167-Lng-A-T | 96   | chr7:122194150-122194250 |
| chr7 | 122460350 | 122460450 | 1100-Lng-A-T | 86   | chr7:122460350-122460450 |
| chr7 | 122542450 | 122542550 | 1004-Lng-A-T | 52   | chr7:122542450-122542550 |
| chr7 | 122546550 | 122546650 | 901-Lng-A-T  | 58   | chr7:122546550-122546650 |
| chr7 | 122615350 | 122615450 | 1065-Lng-B-T | 63   | chr7:122615350-122615450 |
| chr7 | 122815150 | 122815250 | 1072-Lng-A-T | 79   | chr7:122815150-122815250 |
| chr7 | 122864850 | 122864950 | 1274-Lng-A-T | 49   | chr7:122864850-122864950 |
| chr7 | 123242050 | 123242150 | 901-Lng-D-T  | 100  | chr7:123242050-123242150 |
| chr7 | 123284250 | 123284350 | 1072-Lng-A-T | 62   | chr7:123284250-123284350 |
| chr7 | 123509350 | 123509450 | 1090-Lng-A-T | 82   | chr7:123509350-123509450 |
| chr7 | 123510050 | 123510150 | 1274-Lng-A-T | 5939 | chr7:123510050-123510150 |
| chr7 | 123538450 | 123538550 | 1274-Lng-A-T | 60   | chr7:123538450-123538550 |
| chr7 | 123555950 | 123556050 | 1065-Lng-A-T | 86   | chr7:123555950-123556050 |
| chr7 | 123652150 | 123652250 | 1100-Lng-A-T | 72   | chr7:123652150-123652250 |
| chr7 | 123988350 | 123988450 | 1152-Lng-A-T | 102  | chr7:123988350-123988450 |
| chr7 | 124349050 | 124349150 | 1223-Lng-C-T | 57   | chr7:124349050-124349150 |
| chr7 | 124474650 | 124474750 | 1152-Lng-A-T | 91   | chr7:124474650-124474750 |

**Table S2: SB Insertion regions**

|      |           |           |              |     |                          |
|------|-----------|-----------|--------------|-----|--------------------------|
| chr7 | 124529650 | 124529750 | 1065-Lng-C-T | 111 | chr7:124529650-124529750 |
| chr7 | 124577750 | 124577850 | 1274-Lng-A-T | 60  | chr7:124577750-124577850 |
| chr7 | 124716050 | 124716150 | 1090-Lng-A-T | 317 | chr7:124716050-124716150 |
| chr7 | 124774450 | 124774550 | 1223-Lng-B-T | 38  | chr7:124774450-124774550 |
| chr7 | 125039450 | 125039550 | 1072-Lng-A-T | 142 | chr7:125039450-125039550 |
| chr7 | 125058150 | 125058250 | 1072-Lng-A-T | 69  | chr7:125058150-125058250 |
| chr7 | 125127350 | 125127450 | 1090-Lng-A-T | 70  | chr7:125127350-125127450 |
| chr7 | 125250350 | 125250450 | 1065-Lng-B-T | 54  | chr7:125250350-125250450 |
| chr7 | 125274450 | 125274550 | 1274-Lng-A-T | 83  | chr7:125274450-125274550 |
| chr7 | 125286250 | 125286350 | 1065-Lng-A-T | 94  | chr7:125286250-125286350 |
| chr7 | 125306450 | 125306550 | 1274-Lng-A-T | 65  | chr7:125306450-125306550 |
| chr7 | 125309150 | 125309250 | 1223-Lng-B-T | 306 | chr7:125309150-125309250 |
| chr7 | 125322950 | 125323050 | 1188-Lng-A-T | 144 | chr7:125322950-125323050 |
| chr7 | 125341850 | 125341950 | 1072-Lng-A-T | 110 | chr7:125341850-125341950 |
| chr7 | 125344450 | 125344550 | 1065-Lng-B-T | 62  | chr7:125344450-125344550 |
| chr7 | 125365650 | 125365750 | 1004-Lng-A-T | 71  | chr7:125365650-125365750 |
| chr7 | 125666950 | 125667050 | 1274-Lng-A-T | 91  | chr7:125666950-125667050 |
| chr7 | 125774850 | 125774950 | 1151-Lng-A-T | 85  | chr7:125774850-125774950 |
| chr7 | 125780750 | 125780850 | 1223-Lng-A-T | 74  | chr7:125780750-125780850 |
| chr7 | 125828550 | 125828650 | 1223-Lng-B-T | 113 | chr7:125828550-125828650 |
| chr7 | 125879750 | 125879850 | 1004-Lng-A-T | 177 | chr7:125879750-125879850 |
| chr7 | 126288250 | 126288350 | 1004-Lng-A-T | 59  | chr7:126288250-126288350 |
| chr7 | 126490950 | 126491050 | 846-Lng-A-T  | 42  | chr7:126490950-126491050 |
| chr7 | 126549150 | 126549250 | 1167-Lng-A-T | 94  | chr7:126549150-126549250 |
| chr7 | 126550950 | 126551050 | 1004-Lng-A-T | 50  | chr7:126550950-126551050 |
| chr7 | 126637250 | 126637350 | 1004-Lng-A-T | 99  | chr7:126637250-126637350 |
| chr7 | 126660550 | 126660650 | 1065-Lng-B-T | 44  | chr7:126660550-126660650 |
| chr7 | 126762850 | 126762950 | 1188-Lng-A-T | 65  | chr7:126762850-126762950 |
| chr7 | 126871750 | 126871850 | 846-Lng-A-T  | 88  | chr7:126871750-126871850 |
| chr7 | 126921650 | 126921750 | 1004-Lng-A-T | 90  | chr7:126921650-126921750 |
| chr7 | 126996950 | 126997050 | 1223-Lng-A-T | 80  | chr7:126996950-126997050 |
| chr7 | 127010350 | 127010450 | 1065-Lng-B-T | 60  | chr7:127010350-127010450 |
| chr7 | 127010550 | 127010650 | 901-Lng-C-T  | 147 | chr7:127010550-127010650 |
| chr7 | 127046350 | 127046450 | 1223-Lng-A-T | 142 | chr7:127046350-127046450 |
| chr7 | 127260050 | 127260150 | 1223-Lng-A-T | 233 | chr7:127260050-127260150 |
| chr7 | 127315450 | 127315550 | 901-Lng-A-T  | 67  | chr7:127315450-127315550 |
| chr7 | 127388850 | 127388950 | 1072-Lng-A-T | 104 | chr7:127388850-127388950 |
| chr7 | 127495150 | 127495250 | 1065-Lng-C-T | 100 | chr7:127495150-127495250 |
| chr7 | 127763450 | 127763550 | 901-Lng-C-T  | 92  | chr7:127763450-127763550 |
| chr7 | 127779150 | 127779250 | 901-Lng-A-T  | 62  | chr7:127779150-127779250 |
| chr7 | 127779950 | 127780050 | 1072-Lng-A-T | 70  | chr7:127779950-127780050 |
| chr7 | 127827850 | 127827950 | 1100-Lng-A-T | 94  | chr7:127827850-127827950 |
| chr7 | 127861850 | 127861950 | 1188-Lng-A-T | 126 | chr7:127861850-127861950 |
| chr7 | 127985150 | 127985250 | 846-Lng-A-T  | 134 | chr7:127985150-127985250 |
| chr7 | 128098050 | 128098150 | 1100-Lng-A-T | 61  | chr7:128098050-128098150 |
| chr7 | 128276450 | 128276550 | 1065-Lng-B-T | 54  | chr7:128276450-128276550 |

**Table S2: SB Insertion regions**

|      |           |           |              |      |                          |
|------|-----------|-----------|--------------|------|--------------------------|
| chr7 | 128317850 | 128317950 | 1223-Lng-B-T | 54   | chr7:128317850-128317950 |
| chr7 | 128501750 | 128501850 | 1065-Lng-C-T | 65   | chr7:128501750-128501850 |
| chr7 | 128533350 | 128533450 | 1151-Lng-A-T | 68   | chr7:128533350-128533450 |
| chr7 | 128619750 | 128619850 | 1004-Lng-A-T | 99   | chr7:128619750-128619850 |
| chr7 | 128703250 | 128703350 | 1188-Lng-A-T | 113  | chr7:128703250-128703350 |
| chr7 | 128737350 | 128737450 | 1152-Lng-A-T | 68   | chr7:128737350-128737450 |
| chr7 | 128974150 | 128974250 | 901-Lng-A-T  | 269  | chr7:128974150-128974250 |
| chr7 | 129091550 | 129091650 | 1188-Lng-A-T | 36   | chr7:129091550-129091650 |
| chr7 | 129144850 | 129144950 | 1223-Lng-C-T | 46   | chr7:129144850-129144950 |
| chr7 | 129179550 | 129179650 | 901-Lng-A-T  | 50   | chr7:129179550-129179650 |
| chr7 | 129615350 | 129615450 | 1065-Lng-B-T | 83   | chr7:129615350-129615450 |
| chr7 | 130116450 | 130116550 | 1188-Lng-A-T | 59   | chr7:130116450-130116550 |
| chr7 | 130126950 | 130127050 | 1100-Lng-A-T | 65   | chr7:130126950-130127050 |
| chr7 | 130139950 | 130140050 | 1152-Lng-A-T | 201  | chr7:130139950-130140050 |
| chr7 | 130140950 | 130141050 | 1152-Lng-A-T | 92   | chr7:130140950-130141050 |
| chr7 | 130169750 | 130169850 | 1188-Lng-A-T | 1155 | chr7:130169750-130169850 |
| chr7 | 130229350 | 130229450 | 1065-Lng-A-T | 81   | chr7:130229350-130229450 |
| chr7 | 130277150 | 130277250 | 1274-Lng-A-T | 177  | chr7:130277150-130277250 |
| chr7 | 130292250 | 130292350 | 901-Lng-A-T  | 126  | chr7:130292250-130292350 |
| chr7 | 130301250 | 130301350 | 901-Lng-A-T  | 58   | chr7:130301250-130301350 |
| chr7 | 130304350 | 130304450 | 1004-Lng-A-T | 105  | chr7:130304350-130304450 |
| chr7 | 130306950 | 130307050 | 1223-Lng-D-T | 59   | chr7:130306950-130307050 |
| chr7 | 130326650 | 130326750 | 1151-Lng-A-T | 460  | chr7:130326650-130326750 |
| chr7 | 130491250 | 130491350 | 1100-Lng-A-T | 100  | chr7:130491250-130491350 |
| chr7 | 130626550 | 130626650 | 901-Lng-C-T  | 210  | chr7:130626550-130626650 |
| chr7 | 130861850 | 130861950 | 901-Lng-D-T  | 360  | chr7:130861850-130861950 |
| chr7 | 131013250 | 131013350 | 1223-Lng-C-T | 51   | chr7:131013250-131013350 |
| chr7 | 131112650 | 131112750 | 846-Lng-A-T  | 86   | chr7:131112650-131112750 |
| chr7 | 131442850 | 131442950 | 901-Lng-C-T  | 47   | chr7:131442850-131442950 |
| chr7 | 131514550 | 131514650 | 901-Lng-A-T  | 111  | chr7:131514550-131514650 |
| chr7 | 131518550 | 131518650 | 1274-Lng-A-T | 57   | chr7:131518550-131518650 |
| chr7 | 131575550 | 131575650 | 1004-Lng-A-T | 50   | chr7:131575550-131575650 |
| chr7 | 131657450 | 131657550 | 1004-Lng-A-T | 59   | chr7:131657450-131657550 |
| chr7 | 131754150 | 131754250 | 1152-Lng-A-T | 42   | chr7:131754150-131754250 |
| chr7 | 131829750 | 131829850 | 901-Lng-B-T  | 36   | chr7:131829750-131829850 |
| chr7 | 132008050 | 132008150 | 1152-Lng-A-T | 209  | chr7:132008050-132008150 |
| chr7 | 132068950 | 132069050 | 901-Lng-C-T  | 101  | chr7:132068950-132069050 |
| chr7 | 132141950 | 132142050 | 1065-Lng-C-T | 63   | chr7:132141950-132142050 |
| chr7 | 132792450 | 132792550 | 1072-Lng-A-T | 98   | chr7:132792450-132792550 |
| chr7 | 132835950 | 132836050 | 901-Lng-C-T  | 64   | chr7:132835950-132836050 |
| chr7 | 132874450 | 132874550 | 901-Lng-C-T  | 77   | chr7:132874450-132874550 |
| chr7 | 132878650 | 132878750 | 1223-Lng-B-T | 39   | chr7:132878650-132878750 |
| chr7 | 132900650 | 132900750 | 1090-Lng-A-T | 94   | chr7:132900650-132900750 |
| chr7 | 132901150 | 132901250 | 1223-Lng-B-T | 50   | chr7:132901150-132901250 |
| chr7 | 132901850 | 132901950 | 1151-Lng-A-T | 256  | chr7:132901850-132901950 |
| chr7 | 132912550 | 132912650 | 1065-Lng-C-T | 85   | chr7:132912550-132912650 |

**Table S2: SB Insertion regions**

|      |           |           |              |      |                          |
|------|-----------|-----------|--------------|------|--------------------------|
| chr7 | 132945950 | 132946050 | 1090-Lng-A-T | 46   | chr7:132945950-132946050 |
| chr7 | 133181050 | 133181150 | 1065-Lng-C-T | 366  | chr7:133181050-133181150 |
| chr7 | 133258050 | 133258150 | 1167-Lng-A-T | 149  | chr7:133258050-133258150 |
| chr7 | 133261150 | 133261250 | 1223-Lng-B-T | 187  | chr7:133261150-133261250 |
| chr7 | 133311750 | 133311850 | 1090-Lng-A-T | 710  | chr7:133311750-133311850 |
| chr7 | 133314950 | 133315050 | 1072-Lng-A-T | 128  | chr7:133314950-133315050 |
| chr7 | 133333050 | 133333150 | 1090-Lng-B-T | 647  | chr7:133333050-133333150 |
| chr7 | 133444350 | 133444450 | 1072-Lng-A-T | 80   | chr7:133444350-133444450 |
| chr7 | 133542650 | 133542750 | 1100-Lng-A-T | 71   | chr7:133542650-133542750 |
| chr7 | 133825150 | 133825250 | 1152-Lng-A-T | 109  | chr7:133825150-133825250 |
| chr7 | 133889150 | 133889250 | 901-Lng-D-T  | 145  | chr7:133889150-133889250 |
| chr7 | 134079850 | 134079950 | 1151-Lng-A-T | 83   | chr7:134079850-134079950 |
| chr7 | 134167950 | 134168050 | 901-Lng-D-T  | 273  | chr7:134167950-134168050 |
| chr7 | 134174750 | 134174850 | 1151-Lng-A-T | 670  | chr7:134174750-134174850 |
| chr7 | 134349650 | 134349750 | 1090-Lng-B-T | 156  | chr7:134349650-134349750 |
| chr7 | 134389150 | 134389250 | 1090-Lng-A-T | 58   | chr7:134389150-134389250 |
| chr7 | 134408250 | 134408350 | 1072-Lng-A-T | 142  | chr7:134408250-134408350 |
| chr7 | 134426150 | 134426250 | 901-Lng-D-T  | 93   | chr7:134426150-134426250 |
| chr7 | 134495250 | 134495350 | 1167-Lng-A-T | 70   | chr7:134495250-134495350 |
| chr7 | 134626150 | 134626250 | 1274-Lng-A-T | 93   | chr7:134626150-134626250 |
| chr7 | 134682450 | 134682550 | 1004-Lng-A-T | 65   | chr7:134682450-134682550 |
| chr7 | 134896250 | 134896350 | 1065-Lng-C-T | 70   | chr7:134896250-134896350 |
| chr7 | 134928050 | 134928150 | 1167-Lng-A-T | 5131 | chr7:134928050-134928150 |
| chr7 | 135004650 | 135004750 | 1090-Lng-A-T | 83   | chr7:135004650-135004750 |
| chr7 | 135128150 | 135128250 | 1100-Lng-A-T | 76   | chr7:135128150-135128250 |
| chr7 | 135394050 | 135394150 | 1100-Lng-A-T | 117  | chr7:135394050-135394150 |
| chr7 | 135575550 | 135575650 | 1100-Lng-A-T | 852  | chr7:135575550-135575650 |
| chr7 | 135597950 | 135598050 | 1152-Lng-A-T | 68   | chr7:135597950-135598050 |
| chr7 | 135600350 | 135600450 | 1090-Lng-A-T | 61   | chr7:135600350-135600450 |
| chr7 | 135697050 | 135697150 | 901-Lng-C-T  | 47   | chr7:135697050-135697150 |
| chr7 | 135815550 | 135815650 | 901-Lng-A-T  | 105  | chr7:135815550-135815650 |
| chr7 | 135849850 | 135849950 | 1004-Lng-A-T | 98   | chr7:135849850-135849950 |
| chr7 | 135857050 | 135857150 | 1004-Lng-A-T | 51   | chr7:135857050-135857150 |
| chr7 | 135899050 | 135899150 | 1152-Lng-A-T | 64   | chr7:135899050-135899150 |
| chr7 | 135923750 | 135923850 | 1188-Lng-A-T | 67   | chr7:135923750-135923850 |
| chr7 | 135973650 | 135973750 | 901-Lng-C-T  | 39   | chr7:135973650-135973750 |
| chr7 | 136038350 | 136038450 | 901-Lng-C-T  | 45   | chr7:136038350-136038450 |
| chr7 | 136349050 | 136349150 | 901-Lng-A-T  | 97   | chr7:136349050-136349150 |
| chr7 | 136750750 | 136750850 | 1223-Lng-C-T | 395  | chr7:136750750-136750850 |
| chr7 | 136771150 | 136771250 | 1223-Lng-C-T | 44   | chr7:136771150-136771250 |
| chr7 | 136780750 | 136780850 | 1274-Lng-A-T | 49   | chr7:136780750-136780850 |
| chr7 | 136906450 | 136906550 | 1188-Lng-A-T | 210  | chr7:136906450-136906550 |
| chr7 | 136968750 | 136968850 | 901-Lng-C-T  | 31   | chr7:136968750-136968850 |
| chr7 | 137301150 | 137301250 | 1223-Lng-C-T | 68   | chr7:137301150-137301250 |
| chr7 | 137344950 | 137345050 | 1065-Lng-B-T | 41   | chr7:137344950-137345050 |
| chr7 | 137404950 | 137405050 | 1090-Lng-B-T | 302  | chr7:137404950-137405050 |

**Table S2: SB Insertion regions**

|      |           |           |              |     |                          |
|------|-----------|-----------|--------------|-----|--------------------------|
| chr7 | 137596750 | 137596850 | 1072-Lng-A-T | 51  | chr7:137596750-137596850 |
| chr7 | 137599650 | 137599750 | 846-Lng-A-T  | 69  | chr7:137599650-137599750 |
| chr7 | 137627050 | 137627150 | 846-Lng-A-T  | 107 | chr7:137627050-137627150 |
| chr7 | 137660050 | 137660150 | 901-Lng-C-T  | 29  | chr7:137660050-137660150 |
| chr7 | 137660750 | 137660850 | 1223-Lng-C-T | 147 | chr7:137660750-137660850 |
| chr7 | 137709650 | 137709750 | 1274-Lng-A-T | 166 | chr7:137709650-137709750 |
| chr7 | 137743550 | 137743650 | 1100-Lng-A-T | 237 | chr7:137743550-137743650 |
| chr7 | 137816250 | 137816350 | 1100-Lng-A-T | 76  | chr7:137816250-137816350 |
| chr7 | 137853750 | 137853850 | 1274-Lng-A-T | 192 | chr7:137853750-137853850 |
| chr7 | 137865050 | 137865150 | 846-Lng-A-T  | 95  | chr7:137865050-137865150 |
| chr7 | 137880450 | 137880550 | 1274-Lng-A-T | 104 | chr7:137880450-137880550 |
| chr7 | 137888350 | 137888450 | 1072-Lng-A-T | 166 | chr7:137888350-137888450 |
| chr7 | 137896250 | 137896350 | 1004-Lng-A-T | 97  | chr7:137896250-137896350 |
| chr7 | 138029250 | 138029350 | 1167-Lng-A-T | 64  | chr7:138029250-138029350 |
| chr7 | 138033350 | 138033450 | 1100-Lng-B-T | 60  | chr7:138033350-138033450 |
| chr7 | 138050350 | 138050450 | 846-Lng-A-T  | 147 | chr7:138050350-138050450 |
| chr7 | 138104750 | 138104850 | 1072-Lng-A-T | 79  | chr7:138104750-138104850 |
| chr7 | 138455750 | 138455850 | 1274-Lng-A-T | 55  | chr7:138455750-138455850 |
| chr7 | 138491450 | 138491550 | 1152-Lng-A-T | 105 | chr7:138491450-138491550 |
| chr7 | 138502750 | 138502850 | 1004-Lng-A-T | 51  | chr7:138502750-138502850 |
| chr7 | 138542150 | 138542250 | 901-Lng-A-T  | 110 | chr7:138542150-138542250 |
| chr7 | 138600950 | 138601050 | 1090-Lng-A-T | 83  | chr7:138600950-138601050 |
| chr7 | 139256850 | 139256950 | 1072-Lng-A-T | 137 | chr7:139256850-139256950 |
| chr7 | 139349150 | 139349250 | 901-Lng-C-T  | 212 | chr7:139349150-139349250 |
| chr7 | 139524150 | 139524250 | 1223-Lng-B-T | 37  | chr7:139524150-139524250 |
| chr7 | 139611250 | 139611350 | 1100-Lng-A-T | 109 | chr7:139611250-139611350 |
| chr7 | 139630650 | 139630750 | 846-Lng-A-T  | 100 | chr7:139630650-139630750 |
| chr7 | 139697550 | 139697650 | 1090-Lng-A-T | 87  | chr7:139697550-139697650 |
| chr7 | 139746250 | 139746350 | 1152-Lng-A-T | 69  | chr7:139746250-139746350 |
| chr7 | 140044850 | 140044950 | 1151-Lng-A-T | 292 | chr7:140044850-140044950 |
| chr7 | 140133650 | 140133750 | 1100-Lng-A-T | 79  | chr7:140133650-140133750 |
| chr7 | 140134450 | 140134550 | 1072-Lng-A-T | 118 | chr7:140134450-140134550 |
| chr7 | 140166650 | 140166750 | 1167-Lng-A-T | 59  | chr7:140166650-140166750 |
| chr7 | 140181550 | 140181650 | 1065-Lng-B-T | 55  | chr7:140181550-140181650 |
| chr7 | 140618650 | 140618750 | 901-Lng-A-T  | 136 | chr7:140618650-140618750 |
| chr7 | 140655050 | 140655150 | 1188-Lng-A-T | 34  | chr7:140655050-140655150 |
| chr7 | 140961650 | 140961750 | 1152-Lng-A-T | 43  | chr7:140961650-140961750 |
| chr7 | 140966350 | 140966450 | 1223-Lng-A-T | 107 | chr7:140966350-140966450 |
| chr7 | 140992950 | 140993050 | 901-Lng-C-T  | 51  | chr7:140992950-140993050 |
| chr7 | 141063950 | 141064050 | 1004-Lng-A-T | 88  | chr7:141063950-141064050 |
| chr7 | 141478350 | 141478450 | 1065-Lng-B-T | 380 | chr7:141478350-141478450 |
| chr7 | 141506850 | 141506950 | 1223-Lng-D-T | 60  | chr7:141506850-141506950 |
| chr7 | 141771150 | 141771250 | 901-Lng-C-T  | 45  | chr7:141771150-141771250 |
| chr7 | 141927950 | 141928050 | 1004-Lng-A-T | 92  | chr7:141927950-141928050 |
| chr7 | 141999650 | 141999750 | 1274-Lng-A-T | 63  | chr7:141999650-141999750 |
| chr7 | 142012350 | 142012450 | 1152-Lng-A-T | 33  | chr7:142012350-142012450 |



**Table S2: SB Insertion regions**

|      |           |           |              |     |                          |
|------|-----------|-----------|--------------|-----|--------------------------|
| chr7 | 142021450 | 142021550 | 1072-Lng-A-T | 71  | chr7:142021450-142021550 |
| chr7 | 142068950 | 142069050 | 1223-Lng-B-T | 34  | chr7:142068950-142069050 |
| chr7 | 142202950 | 142203050 | 1151-Lng-A-T | 209 | chr7:142202950-142203050 |
| chr7 | 142212750 | 142212850 | 1100-Lng-A-T | 82  | chr7:142212750-142212850 |
| chr7 | 142215550 | 142215650 | 1065-Lng-A-T | 92  | chr7:142215550-142215650 |
| chr7 | 142243550 | 142243650 | 1100-Lng-A-T | 62  | chr7:142243550-142243650 |
| chr7 | 142275150 | 142275250 | 1065-Lng-A-T | 39  | chr7:142275150-142275250 |
| chr7 | 142283750 | 142283850 | 1065-Lng-C-T | 65  | chr7:142283750-142283850 |
| chr7 | 142298750 | 142298850 | 901-Lng-C-T  | 55  | chr7:142298750-142298850 |
| chr7 | 142306350 | 142306450 | 901-Lng-C-T  | 214 | chr7:142306350-142306450 |
| chr7 | 142356550 | 142356650 | 1223-Lng-B-T | 79  | chr7:142356550-142356650 |
| chr7 | 142365650 | 142365750 | 1188-Lng-A-T | 68  | chr7:142365650-142365750 |
| chr7 | 142370550 | 142370650 | 1167-Lng-A-T | 59  | chr7:142370550-142370650 |
| chr7 | 142371150 | 142371250 | 901-Lng-A-T  | 121 | chr7:142371150-142371250 |
| chr7 | 143165950 | 143166050 | 1004-Lng-A-T | 62  | chr7:143165950-143166050 |
| chr7 | 143405050 | 143405150 | 901-Lng-D-T  | 561 | chr7:143405050-143405150 |
| chr7 | 143510550 | 143510650 | 901-Lng-D-T  | 42  | chr7:143510550-143510650 |
| chr7 | 144522450 | 144522550 | 1004-Lng-A-T | 78  | chr7:144522450-144522550 |
| chr7 | 144639250 | 144639350 | 1065-Lng-B-T | 107 | chr7:144639250-144639350 |
| chr7 | 144823850 | 144823950 | 1065-Lng-B-T | 74  | chr7:144823850-144823950 |
| chr7 | 145080750 | 145080850 | 1167-Lng-A-T | 99  | chr7:145080750-145080850 |
| chr7 | 145368250 | 145368350 | 1274-Lng-A-T | 90  | chr7:145368250-145368350 |
| chr7 | 145498350 | 145498450 | 1152-Lng-A-T | 196 | chr7:145498350-145498450 |
| chr7 | 145567050 | 145567150 | 1100-Lng-A-T | 69  | chr7:145567050-145567150 |
| chr7 | 145569850 | 145569950 | 1100-Lng-A-T | 156 | chr7:145569850-145569950 |
| chr7 | 145820250 | 145820350 | 1004-Lng-A-T | 71  | chr7:145820250-145820350 |
| chr7 | 146053750 | 146053850 | 1188-Lng-A-T | 38  | chr7:146053750-146053850 |
| chr7 | 146080450 | 146080550 | 1090-Lng-B-T | 397 | chr7:146080450-146080550 |
| chr7 | 146112150 | 146112250 | 1004-Lng-A-T | 68  | chr7:146112150-146112250 |
| chr7 | 146149050 | 146149150 | 1004-Lng-A-T | 56  | chr7:146149050-146149150 |
| chr7 | 146332750 | 146332850 | 846-Lng-A-T  | 84  | chr7:146332750-146332850 |
| chr7 | 146659750 | 146659850 | 1223-Lng-B-T | 344 | chr7:146659750-146659850 |
| chr7 | 147190050 | 147190150 | 1223-Lng-D-T | 43  | chr7:147190050-147190150 |
| chr7 | 147501350 | 147501450 | 1004-Lng-A-T | 68  | chr7:147501350-147501450 |
| chr7 | 147669750 | 147669850 | 1065-Lng-B-T | 48  | chr7:147669750-147669850 |
| chr7 | 147684650 | 147684750 | 901-Lng-A-T  | 58  | chr7:147684650-147684750 |
| chr7 | 148350950 | 148351050 | 1274-Lng-A-T | 49  | chr7:148350950-148351050 |
| chr7 | 148381750 | 148381850 | 1100-Lng-A-T | 78  | chr7:148381750-148381850 |
| chr7 | 148430750 | 148430850 | 1152-Lng-A-T | 105 | chr7:148430750-148430850 |
| chr7 | 148432150 | 148432250 | 901-Lng-B-T  | 36  | chr7:148432150-148432250 |
| chr7 | 148451550 | 148451650 | 1223-Lng-D-T | 209 | chr7:148451550-148451650 |
| chr7 | 148504950 | 148505050 | 1167-Lng-A-T | 93  | chr7:148504950-148505050 |
| chr7 | 148508850 | 148508950 | 1065-Lng-A-T | 52  | chr7:148508850-148508950 |
| chr7 | 148621950 | 148622050 | 1090-Lng-A-T | 46  | chr7:148621950-148622050 |
| chr7 | 148767450 | 148767550 | 1090-Lng-A-T | 46  | chr7:148767450-148767550 |
| chr7 | 148772550 | 148772650 | 1090-Lng-A-T | 64  | chr7:148772550-148772650 |

**Table S2: SB Insertion regions**

|      |           |           |              |      |                          |
|------|-----------|-----------|--------------|------|--------------------------|
| chr7 | 148794250 | 148794350 | 1167-Lng-A-T | 110  | chr7:148794250-148794350 |
| chr7 | 149052850 | 149052950 | 1072-Lng-A-T | 143  | chr7:149052850-149052950 |
| chr7 | 149071050 | 149071150 | 1065-Lng-C-T | 75   | chr7:149071050-149071150 |
| chr7 | 149180050 | 149180150 | 901-Lng-B-T  | 75   | chr7:149180050-149180150 |
| chr7 | 149441550 | 149441650 | 1065-Lng-A-T | 42   | chr7:149441550-149441650 |
| chr7 | 149583050 | 149583150 | 1274-Lng-A-T | 180  | chr7:149583050-149583150 |
| chr7 | 150303950 | 150304050 | 1100-Lng-A-T | 141  | chr7:150303950-150304050 |
| chr7 | 150349250 | 150349350 | 1274-Lng-A-T | 59   | chr7:150349250-150349350 |
| chr7 | 150378550 | 150378650 | 1004-Lng-A-T | 58   | chr7:150378550-150378650 |
| chr7 | 150391150 | 150391250 | 901-Lng-D-T  | 88   | chr7:150391150-150391250 |
| chr7 | 150432950 | 150433050 | 1065-Lng-A-T | 79   | chr7:150432950-150433050 |
| chr7 | 150461850 | 150461950 | 1223-Lng-C-T | 44   | chr7:150461850-150461950 |
| chr7 | 150510450 | 150510550 | 1151-Lng-A-T | 56   | chr7:150510450-150510550 |
| chr7 | 150520150 | 150520250 | 846-Lng-A-T  | 621  | chr7:150520150-150520250 |
| chr7 | 150591150 | 150591250 | 1072-Lng-A-T | 49   | chr7:150591150-150591250 |
| chr7 | 150674950 | 150675050 | 1065-Lng-B-T | 99   | chr7:150674950-150675050 |
| chr7 | 150717050 | 150717150 | 1072-Lng-A-T | 187  | chr7:150717050-150717150 |
| chr7 | 150766150 | 150766250 | 1274-Lng-A-T | 50   | chr7:150766150-150766250 |
| chr7 | 150773450 | 150773550 | 901-Lng-D-T  | 88   | chr7:150773450-150773550 |
| chr7 | 150870650 | 150870750 | 1274-Lng-A-T | 187  | chr7:150870650-150870750 |
| chr7 | 151244050 | 151244150 | 1223-Lng-C-T | 44   | chr7:151244050-151244150 |
| chr7 | 151275850 | 151275950 | 1100-Lng-A-T | 76   | chr7:151275850-151275950 |
| chr7 | 151284050 | 151284150 | 1065-Lng-B-T | 39   | chr7:151284050-151284150 |
| chr7 | 151773350 | 151773450 | 1090-Lng-A-T | 44   | chr7:151773350-151773450 |
| chr7 | 151938650 | 151938750 | 1152-Lng-A-T | 51   | chr7:151938650-151938750 |
| chr7 | 152103250 | 152103350 | 1223-Lng-B-T | 89   | chr7:152103250-152103350 |
| chr7 | 152159950 | 152160050 | 1090-Lng-A-T | 61   | chr7:152159950-152160050 |
| chr7 | 152172150 | 152172250 | 901-Lng-D-T  | 117  | chr7:152172150-152172250 |
| chr7 | 152244150 | 152244250 | 901-Lng-C-T  | 74   | chr7:152244150-152244250 |
| chr8 | 3161150   | 3161250   | 1223-Lng-A-T | 98   | chr8:3161150-3161250     |
| chr8 | 3177250   | 3177350   | 901-Lng-B-T  | 64   | chr8:3177250-3177350     |
| chr8 | 3208450   | 3208550   | 901-Lng-B-T  | 45   | chr8:3208450-3208550     |
| chr8 | 3246750   | 3246850   | 901-Lng-A-T  | 339  | chr8:3246750-3246850     |
| chr8 | 3413450   | 3413550   | 1152-Lng-A-T | 36   | chr8:3413450-3413550     |
| chr8 | 3419050   | 3419150   | 1274-Lng-A-T | 82   | chr8:3419050-3419150     |
| chr8 | 3454850   | 3454950   | 1100-Lng-A-T | 84   | chr8:3454850-3454950     |
| chr8 | 3822550   | 3822650   | 1065-Lng-C-T | 93   | chr8:3822550-3822650     |
| chr8 | 3880950   | 3881050   | 1274-Lng-A-T | 172  | chr8:3880950-3881050     |
| chr8 | 3922850   | 3922950   | 1223-Lng-A-T | 2978 | chr8:3922850-3922950     |
| chr8 | 4003550   | 4003650   | 1004-Lng-A-T | 49   | chr8:4003550-4003650     |
| chr8 | 4163950   | 4164050   | 901-Lng-B-T  | 45   | chr8:4163950-4164050     |
| chr8 | 4242050   | 4242150   | 901-Lng-B-T  | 146  | chr8:4242050-4242150     |
| chr8 | 4280950   | 4281050   | 1100-Lng-A-T | 60   | chr8:4280950-4281050     |
| chr8 | 4294250   | 4294350   | 1100-Lng-A-T | 90   | chr8:4294250-4294350     |
| chr8 | 4294450   | 4294550   | 1004-Lng-A-T | 73   | chr8:4294450-4294550     |
| chr8 | 4302650   | 4302750   | 901-Lng-A-T  | 167  | chr8:4302650-4302750     |

**Table S2: SB Insertion regions**

|      |         |         |              |     |                      |
|------|---------|---------|--------------|-----|----------------------|
| chr8 | 4626050 | 4626150 | 1152-Lng-A-T | 97  | chr8:4626050-4626150 |
| chr8 | 4630250 | 4630350 | 1223-Lng-A-T | 187 | chr8:4630250-4630350 |
| chr8 | 4634850 | 4634950 | 901-Lng-B-T  | 222 | chr8:4634850-4634950 |
| chr8 | 4782450 | 4782550 | 1188-Lng-A-T | 37  | chr8:4782450-4782550 |
| chr8 | 4866250 | 4866350 | 1004-Lng-A-T | 115 | chr8:4866250-4866350 |
| chr8 | 5031850 | 5031950 | 901-Lng-A-T  | 62  | chr8:5031850-5031950 |
| chr8 | 5067650 | 5067750 | 1100-Lng-A-T | 65  | chr8:5067650-5067750 |
| chr8 | 5171950 | 5172050 | 1065-Lng-A-T | 87  | chr8:5171950-5172050 |
| chr8 | 5337450 | 5337550 | 1090-Lng-B-T | 476 | chr8:5337450-5337550 |
| chr8 | 5391550 | 5391650 | 1004-Lng-A-T | 88  | chr8:5391550-5391650 |
| chr8 | 5479650 | 5479750 | 1167-Lng-A-T | 114 | chr8:5479650-5479750 |
| chr8 | 5554150 | 5554250 | 1223-Lng-B-T | 227 | chr8:5554150-5554250 |
| chr8 | 5594150 | 5594250 | 1167-Lng-A-T | 49  | chr8:5594150-5594250 |
| chr8 | 5986550 | 5986650 | 901-Lng-D-T  | 251 | chr8:5986550-5986650 |
| chr8 | 6082150 | 6082250 | 1100-Lng-A-T | 55  | chr8:6082150-6082250 |
| chr8 | 6161950 | 6162050 | 1072-Lng-A-T | 106 | chr8:6161950-6162050 |
| chr8 | 6202550 | 6202650 | 1167-Lng-A-T | 48  | chr8:6202550-6202650 |
| chr8 | 6602550 | 6602650 | 901-Lng-C-T  | 72  | chr8:6602550-6602650 |
| chr8 | 6931050 | 6931150 | 1004-Lng-A-T | 138 | chr8:6931050-6931150 |
| chr8 | 6939850 | 6939950 | 901-Lng-B-T  | 194 | chr8:6939850-6939950 |
| chr8 | 6962150 | 6962250 | 901-Lng-B-T  | 124 | chr8:6962150-6962250 |
| chr8 | 7193350 | 7193450 | 1065-Lng-B-T | 83  | chr8:7193350-7193450 |
| chr8 | 7344950 | 7345050 | 1065-Lng-B-T | 39  | chr8:7344950-7345050 |
| chr8 | 7418550 | 7418650 | 1223-Lng-D-T | 54  | chr8:7418550-7418650 |
| chr8 | 7483750 | 7483850 | 1065-Lng-A-T | 42  | chr8:7483750-7483850 |
| chr8 | 7513950 | 7514050 | 1223-Lng-D-T | 45  | chr8:7513950-7514050 |
| chr8 | 7917650 | 7917750 | 1090-Lng-B-T | 386 | chr8:7917650-7917750 |
| chr8 | 8050850 | 8050950 | 1167-Lng-A-T | 106 | chr8:8050850-8050950 |
| chr8 | 8051550 | 8051650 | 1152-Lng-A-T | 115 | chr8:8051550-8051650 |
| chr8 | 8173250 | 8173350 | 901-Lng-A-T  | 56  | chr8:8173250-8173350 |
| chr8 | 8517150 | 8517250 | 1090-Lng-A-T | 50  | chr8:8517150-8517250 |
| chr8 | 8597950 | 8598050 | 1274-Lng-A-T | 66  | chr8:8597950-8598050 |
| chr8 | 8679150 | 8679250 | 901-Lng-A-T  | 129 | chr8:8679150-8679250 |
| chr8 | 8682550 | 8682650 | 1151-Lng-A-T | 119 | chr8:8682550-8682650 |
| chr8 | 8859550 | 8859650 | 1223-Lng-A-T | 138 | chr8:8859550-8859650 |
| chr8 | 8866150 | 8866250 | 1065-Lng-A-T | 60  | chr8:8866150-8866250 |
| chr8 | 8882550 | 8882650 | 1004-Lng-A-T | 466 | chr8:8882550-8882650 |
| chr8 | 8973350 | 8973450 | 1100-Lng-A-T | 121 | chr8:8973350-8973450 |
| chr8 | 8977450 | 8977550 | 846-Lng-A-T  | 93  | chr8:8977450-8977550 |
| chr8 | 9016950 | 9017050 | 1090-Lng-A-T | 120 | chr8:9016950-9017050 |
| chr8 | 9068250 | 9068350 | 1065-Lng-A-T | 117 | chr8:9068250-9068350 |
| chr8 | 9226950 | 9227050 | 901-Lng-A-T  | 70  | chr8:9226950-9227050 |
| chr8 | 9227750 | 9227850 | 1004-Lng-A-T | 66  | chr8:9227750-9227850 |
| chr8 | 9331350 | 9331450 | 1100-Lng-A-T | 80  | chr8:9331350-9331450 |
| chr8 | 9627950 | 9628050 | 1151-Lng-A-T | 141 | chr8:9627950-9628050 |
| chr8 | 9984350 | 9984450 | 1188-Lng-A-T | 77  | chr8:9984350-9984450 |

**Table S2: SB Insertion regions**

|      |          |          |              |     |                        |
|------|----------|----------|--------------|-----|------------------------|
| chr8 | 10186750 | 10186850 | 1004-Lng-A-T | 74  | chr8:10186750-10186850 |
| chr8 | 10210550 | 10210650 | 1004-Lng-A-T | 51  | chr8:10210550-10210650 |
| chr8 | 10433050 | 10433150 | 1072-Lng-A-T | 212 | chr8:10433050-10433150 |
| chr8 | 10852550 | 10852650 | 1152-Lng-A-T | 141 | chr8:10852550-10852650 |
| chr8 | 10862850 | 10862950 | 1004-Lng-A-T | 357 | chr8:10862850-10862950 |
| chr8 | 10881050 | 10881150 | 846-Lng-A-T  | 111 | chr8:10881050-10881150 |
| chr8 | 10986750 | 10986850 | 901-Lng-A-T  | 90  | chr8:10986750-10986850 |
| chr8 | 11043350 | 11043450 | 1100-Lng-A-T | 55  | chr8:11043350-11043450 |
| chr8 | 11084850 | 11084950 | 846-Lng-A-T  | 66  | chr8:11084850-11084950 |
| chr8 | 11126250 | 11126350 | 1223-Lng-B-T | 34  | chr8:11126250-11126350 |
| chr8 | 11212350 | 11212450 | 1100-Lng-A-T | 105 | chr8:11212350-11212450 |
| chr8 | 11219850 | 11219950 | 1223-Lng-D-T | 47  | chr8:11219850-11219950 |
| chr8 | 11293150 | 11293250 | 1100-Lng-A-T | 64  | chr8:11293150-11293250 |
| chr8 | 11335050 | 11335150 | 901-Lng-D-T  | 380 | chr8:11335050-11335150 |
| chr8 | 11335250 | 11335350 | 1274-Lng-A-T | 77  | chr8:11335250-11335350 |
| chr8 | 11349250 | 11349350 | 1004-Lng-A-T | 84  | chr8:11349250-11349350 |
| chr8 | 11360950 | 11361050 | 901-Lng-A-T  | 140 | chr8:11360950-11361050 |
| chr8 | 11422450 | 11422550 | 1090-Lng-B-T | 468 | chr8:11422450-11422550 |
| chr8 | 11455450 | 11455550 | 1072-Lng-A-T | 94  | chr8:11455450-11455550 |
| chr8 | 11536950 | 11537050 | 901-Lng-B-T  | 107 | chr8:11536950-11537050 |
| chr8 | 11540850 | 11540950 | 901-Lng-B-T  | 130 | chr8:11540850-11540950 |
| chr8 | 11627250 | 11627350 | 1100-Lng-B-T | 51  | chr8:11627250-11627350 |
| chr8 | 11827050 | 11827150 | 1188-Lng-A-T | 34  | chr8:11827050-11827150 |
| chr8 | 11845750 | 11845850 | 1065-Lng-B-T | 69  | chr8:11845750-11845850 |
| chr8 | 12072250 | 12072350 | 1065-Lng-B-T | 54  | chr8:12072250-12072350 |
| chr8 | 12202250 | 12202350 | 1274-Lng-A-T | 94  | chr8:12202250-12202350 |
| chr8 | 12482150 | 12482250 | 1090-Lng-A-T | 61  | chr8:12482150-12482250 |
| chr8 | 12604850 | 12604950 | 1223-Lng-D-T | 62  | chr8:12604850-12604950 |
| chr8 | 12708450 | 12708550 | 1188-Lng-A-T | 50  | chr8:12708450-12708550 |
| chr8 | 12765950 | 12766050 | 1072-Lng-A-T | 48  | chr8:12765950-12766050 |
| chr8 | 12774250 | 12774350 | 901-Lng-C-T  | 103 | chr8:12774250-12774350 |
| chr8 | 13064050 | 13064150 | 1188-Lng-A-T | 83  | chr8:13064050-13064150 |
| chr8 | 13112950 | 13113050 | 1151-Lng-A-T | 216 | chr8:13112950-13113050 |
| chr8 | 13209450 | 13209550 | 1004-Lng-A-T | 70  | chr8:13209450-13209550 |
| chr8 | 13274250 | 13274350 | 1004-Lng-A-T | 61  | chr8:13274250-13274350 |
| chr8 | 13507650 | 13507750 | 1072-Lng-A-T | 109 | chr8:13507650-13507750 |
| chr8 | 13517150 | 13517250 | 1100-Lng-A-T | 52  | chr8:13517150-13517250 |
| chr8 | 13649650 | 13649750 | 1274-Lng-A-T | 55  | chr8:13649650-13649750 |
| chr8 | 13767950 | 13768050 | 1274-Lng-A-T | 80  | chr8:13767950-13768050 |
| chr8 | 13774450 | 13774550 | 1274-Lng-A-T | 217 | chr8:13774450-13774550 |
| chr8 | 13787050 | 13787150 | 1223-Lng-B-T | 39  | chr8:13787050-13787150 |
| chr8 | 13874950 | 13875050 | 1065-Lng-B-T | 71  | chr8:13874950-13875050 |
| chr8 | 13972250 | 13972350 | 1223-Lng-A-T | 153 | chr8:13972250-13972350 |
| chr8 | 14036650 | 14036750 | 1188-Lng-A-T | 41  | chr8:14036650-14036750 |
| chr8 | 14049150 | 14049250 | 1004-Lng-A-T | 109 | chr8:14049150-14049250 |
| chr8 | 14418750 | 14418850 | 1065-Lng-A-T | 58  | chr8:14418750-14418850 |

**Table S2: SB Insertion regions**

|      |          |          |              |      |                        |
|------|----------|----------|--------------|------|------------------------|
| chr8 | 14529250 | 14529350 | 1065-Lng-B-T | 70   | chr8:14529250-14529350 |
| chr8 | 15001850 | 15001950 | 1223-Lng-A-T | 264  | chr8:15001850-15001950 |
| chr8 | 15019650 | 15019750 | 1065-Lng-A-T | 37   | chr8:15019650-15019750 |
| chr8 | 15211850 | 15211950 | 1072-Lng-A-T | 58   | chr8:15211850-15211950 |
| chr8 | 15408750 | 15408850 | 1223-Lng-A-T | 92   | chr8:15408750-15408850 |
| chr8 | 15929250 | 15929350 | 1223-Lng-D-T | 47   | chr8:15929250-15929350 |
| chr8 | 15992550 | 15992650 | 1223-Lng-C-T | 49   | chr8:15992550-15992650 |
| chr8 | 16035350 | 16035450 | 1065-Lng-A-T | 48   | chr8:16035350-16035450 |
| chr8 | 16038550 | 16038650 | 1090-Lng-A-T | 61   | chr8:16038550-16038650 |
| chr8 | 16132250 | 16132350 | 1065-Lng-B-T | 42   | chr8:16132250-16132350 |
| chr8 | 16161050 | 16161150 | 1065-Lng-A-T | 75   | chr8:16161050-16161150 |
| chr8 | 16281550 | 16281650 | 1065-Lng-A-T | 82   | chr8:16281550-16281650 |
| chr8 | 16648950 | 16649050 | 846-Lng-A-T  | 114  | chr8:16648950-16649050 |
| chr8 | 17390950 | 17391050 | 901-Lng-A-T  | 281  | chr8:17390950-17391050 |
| chr8 | 17686050 | 17686150 | 1065-Lng-A-T | 34   | chr8:17686050-17686150 |
| chr8 | 17746250 | 17746350 | 846-Lng-A-T  | 73   | chr8:17746250-17746350 |
| chr8 | 17801750 | 17801850 | 1223-Lng-B-T | 35   | chr8:17801750-17801850 |
| chr8 | 17907250 | 17907350 | 1090-Lng-A-T | 86   | chr8:17907250-17907350 |
| chr8 | 17919050 | 17919150 | 1090-Lng-A-T | 58   | chr8:17919050-17919150 |
| chr8 | 17935950 | 17936050 | 901-Lng-A-T  | 77   | chr8:17935950-17936050 |
| chr8 | 17940150 | 17940250 | 1223-Lng-A-T | 112  | chr8:17940150-17940250 |
| chr8 | 18622650 | 18622750 | 1004-Lng-A-T | 49   | chr8:18622650-18622750 |
| chr8 | 18630150 | 18630250 | 1065-Lng-A-T | 80   | chr8:18630150-18630250 |
| chr8 | 18721850 | 18721950 | 901-Lng-A-T  | 159  | chr8:18721850-18721950 |
| chr8 | 18759250 | 18759350 | 1065-Lng-B-T | 54   | chr8:18759250-18759350 |
| chr8 | 18816950 | 18817050 | 1090-Lng-B-T | 106  | chr8:18816950-18817050 |
| chr8 | 18853850 | 18853950 | 1065-Lng-A-T | 36   | chr8:18853850-18853950 |
| chr8 | 18884950 | 18885050 | 1065-Lng-A-T | 55   | chr8:18884950-18885050 |
| chr8 | 19046650 | 19046750 | 901-Lng-A-T  | 124  | chr8:19046650-19046750 |
| chr8 | 19133650 | 19133750 | 901-Lng-C-T  | 34   | chr8:19133650-19133750 |
| chr8 | 19162350 | 19162450 | 901-Lng-A-T  | 174  | chr8:19162350-19162450 |
| chr8 | 19296150 | 19296250 | 1004-Lng-A-T | 75   | chr8:19296150-19296250 |
| chr8 | 19567250 | 19567350 | 1090-Lng-A-T | 129  | chr8:19567250-19567350 |
| chr8 | 19606150 | 19606250 | 1100-Lng-A-T | 78   | chr8:19606150-19606250 |
| chr8 | 19762450 | 19762550 | 1188-Lng-A-T | 199  | chr8:19762450-19762550 |
| chr8 | 22081950 | 22082050 | 1004-Lng-A-T | 52   | chr8:22081950-22082050 |
| chr8 | 22158450 | 22158550 | 901-Lng-B-T  | 160  | chr8:22158450-22158550 |
| chr8 | 23011850 | 23011950 | 1188-Lng-A-T | 227  | chr8:23011850-23011950 |
| chr8 | 23177450 | 23177550 | 1188-Lng-A-T | 122  | chr8:23177450-23177550 |
| chr8 | 23311450 | 23311550 | 1151-Lng-A-T | 1346 | chr8:23311450-23311550 |
| chr8 | 23351950 | 23352050 | 1152-Lng-A-T | 97   | chr8:23351950-23352050 |
| chr8 | 23373150 | 23373250 | 1274-Lng-A-T | 100  | chr8:23373150-23373250 |
| chr8 | 23468750 | 23468850 | 1065-Lng-C-T | 75   | chr8:23468750-23468850 |
| chr8 | 23509350 | 23509450 | 846-Lng-A-T  | 79   | chr8:23509350-23509450 |
| chr8 | 23564850 | 23564950 | 901-Lng-B-T  | 97   | chr8:23564850-23564950 |
| chr8 | 23584750 | 23584850 | 1100-Lng-A-T | 121  | chr8:23584750-23584850 |

**Table S2: SB Insertion regions**

|      |          |          |              |      |                        |
|------|----------|----------|--------------|------|------------------------|
| chr8 | 23612050 | 23612150 | 1188-Lng-A-T | 115  | chr8:23612050-23612150 |
| chr8 | 23670450 | 23670550 | 1090-Lng-A-T | 82   | chr8:23670450-23670550 |
| chr8 | 23722650 | 23722750 | 1100-Lng-A-T | 80   | chr8:23722650-23722750 |
| chr8 | 23764250 | 23764350 | 1151-Lng-A-T | 58   | chr8:23764250-23764350 |
| chr8 | 24002350 | 24002450 | 901-Lng-C-T  | 244  | chr8:24002350-24002450 |
| chr8 | 24015750 | 24015850 | 1065-Lng-B-T | 66   | chr8:24015750-24015850 |
| chr8 | 24050650 | 24050750 | 1090-Lng-A-T | 52   | chr8:24050650-24050750 |
| chr8 | 24206050 | 24206150 | 1065-Lng-C-T | 1931 | chr8:24206050-24206150 |
| chr8 | 24354850 | 24354950 | 901-Lng-D-T  | 48   | chr8:24354850-24354950 |
| chr8 | 24609350 | 24609450 | 1100-Lng-A-T | 72   | chr8:24609350-24609450 |
| chr8 | 25098150 | 25098250 | 1065-Lng-B-T | 76   | chr8:25098150-25098250 |
| chr8 | 25192150 | 25192250 | 1152-Lng-A-T | 51   | chr8:25192150-25192250 |
| chr8 | 25451550 | 25451650 | 1065-Lng-C-T | 97   | chr8:25451550-25451650 |
| chr8 | 25899450 | 25899550 | 846-Lng-A-T  | 47   | chr8:25899450-25899550 |
| chr8 | 25991750 | 25991850 | 1223-Lng-A-T | 94   | chr8:25991750-25991850 |
| chr8 | 26296750 | 26296850 | 1065-Lng-A-T | 66   | chr8:26296750-26296850 |
| chr8 | 26529350 | 26529450 | 1274-Lng-A-T | 61   | chr8:26529350-26529450 |
| chr8 | 26694550 | 26694650 | 901-Lng-A-T  | 54   | chr8:26694550-26694650 |
| chr8 | 26719850 | 26719950 | 1100-Lng-A-T | 140  | chr8:26719850-26719950 |
| chr8 | 26755450 | 26755550 | 1151-Lng-A-T | 122  | chr8:26755450-26755550 |
| chr8 | 26806650 | 26806750 | 901-Lng-C-T  | 64   | chr8:26806650-26806750 |
| chr8 | 26949150 | 26949250 | 1072-Lng-A-T | 53   | chr8:26949150-26949250 |
| chr8 | 27099950 | 27100050 | 846-Lng-A-T  | 144  | chr8:27099950-27100050 |
| chr8 | 27100950 | 27101050 | 1004-Lng-A-T | 93   | chr8:27100950-27101050 |
| chr8 | 27205250 | 27205350 | 901-Lng-D-T  | 465  | chr8:27205250-27205350 |
| chr8 | 28202250 | 28202350 | 901-Lng-B-T  | 132  | chr8:28202250-28202350 |
| chr8 | 28468450 | 28468550 | 1065-Lng-A-T | 97   | chr8:28468450-28468550 |
| chr8 | 28603650 | 28603750 | 1065-Lng-A-T | 53   | chr8:28603650-28603750 |
| chr8 | 28630050 | 28630150 | 1065-Lng-C-T | 399  | chr8:28630050-28630150 |
| chr8 | 28630950 | 28631050 | 1065-Lng-A-T | 115  | chr8:28630950-28631050 |
| chr8 | 28954150 | 28954250 | 846-Lng-A-T  | 156  | chr8:28954150-28954250 |
| chr8 | 29072250 | 29072350 | 1223-Lng-B-T | 236  | chr8:29072250-29072350 |
| chr8 | 29176150 | 29176250 | 1065-Lng-B-T | 58   | chr8:29176150-29176250 |
| chr8 | 29182150 | 29182250 | 1223-Lng-A-T | 731  | chr8:29182150-29182250 |
| chr8 | 29340250 | 29340350 | 1065-Lng-B-T | 55   | chr8:29340250-29340350 |
| chr8 | 29353050 | 29353150 | 1004-Lng-A-T | 79   | chr8:29353050-29353150 |
| chr8 | 29381050 | 29381150 | 901-Lng-B-T  | 92   | chr8:29381050-29381150 |
| chr8 | 29433850 | 29433950 | 901-Lng-B-T  | 317  | chr8:29433850-29433950 |
| chr8 | 29850050 | 29850150 | 901-Lng-C-T  | 59   | chr8:29850050-29850150 |
| chr8 | 30132150 | 30132250 | 1223-Lng-B-T | 38   | chr8:30132150-30132250 |
| chr8 | 30385150 | 30385250 | 1090-Lng-B-T | 527  | chr8:30385150-30385250 |
| chr8 | 30488850 | 30488950 | 1100-Lng-A-T | 52   | chr8:30488850-30488950 |
| chr8 | 30554250 | 30554350 | 1004-Lng-A-T | 52   | chr8:30554250-30554350 |
| chr8 | 30770650 | 30770750 | 1223-Lng-B-T | 35   | chr8:30770650-30770750 |
| chr8 | 31074050 | 31074150 | 1152-Lng-A-T | 56   | chr8:31074050-31074150 |
| chr8 | 31079450 | 31079550 | 1152-Lng-A-T | 111  | chr8:31079450-31079550 |

**Table S2: SB Insertion regions**

|      |          |          |              |      |                        |
|------|----------|----------|--------------|------|------------------------|
| chr8 | 31224650 | 31224750 | 901-Lng-D-T  | 302  | chr8:31224650-31224750 |
| chr8 | 31247450 | 31247550 | 1065-Lng-A-T | 62   | chr8:31247450-31247550 |
| chr8 | 31257750 | 31257850 | 1274-Lng-A-T | 50   | chr8:31257750-31257850 |
| chr8 | 31365350 | 31365450 | 1152-Lng-A-T | 238  | chr8:31365350-31365450 |
| chr8 | 31445750 | 31445850 | 1004-Lng-A-T | 49   | chr8:31445750-31445850 |
| chr8 | 31482450 | 31482550 | 1274-Lng-A-T | 125  | chr8:31482450-31482550 |
| chr8 | 31656150 | 31656250 | 1090-Lng-A-T | 72   | chr8:31656150-31656250 |
| chr8 | 31831150 | 31831250 | 1223-Lng-B-T | 42   | chr8:31831150-31831250 |
| chr8 | 31866050 | 31866150 | 1274-Lng-A-T | 81   | chr8:31866050-31866150 |
| chr8 | 31871250 | 31871350 | 1065-Lng-A-T | 58   | chr8:31871250-31871350 |
| chr8 | 32262850 | 32262950 | 1152-Lng-A-T | 108  | chr8:32262850-32262950 |
| chr8 | 32304150 | 32304250 | 1090-Lng-A-T | 88   | chr8:32304150-32304250 |
| chr8 | 32480550 | 32480650 | 901-Lng-A-T  | 93   | chr8:32480550-32480650 |
| chr8 | 32632550 | 32632650 | 1004-Lng-A-T | 57   | chr8:32632550-32632650 |
| chr8 | 32710950 | 32711050 | 1274-Lng-A-T | 58   | chr8:32710950-32711050 |
| chr8 | 33026250 | 33026350 | 846-Lng-A-T  | 88   | chr8:33026250-33026350 |
| chr8 | 33047450 | 33047550 | 1223-Lng-C-T | 69   | chr8:33047450-33047550 |
| chr8 | 33117150 | 33117250 | 1167-Lng-A-T | 115  | chr8:33117150-33117250 |
| chr8 | 33214350 | 33214450 | 1223-Lng-A-T | 53   | chr8:33214350-33214450 |
| chr8 | 33402650 | 33402750 | 1004-Lng-A-T | 75   | chr8:33402650-33402750 |
| chr8 | 33414950 | 33415050 | 1152-Lng-A-T | 290  | chr8:33414950-33415050 |
| chr8 | 33618950 | 33619050 | 1090-Lng-A-T | 74   | chr8:33618950-33619050 |
| chr8 | 33836550 | 33836650 | 1065-Lng-A-T | 83   | chr8:33836550-33836650 |
| chr8 | 34012650 | 34012750 | 1072-Lng-A-T | 141  | chr8:34012650-34012750 |
| chr8 | 34122550 | 34122650 | 1274-Lng-A-T | 60   | chr8:34122550-34122650 |
| chr8 | 34309550 | 34309650 | 1152-Lng-A-T | 31   | chr8:34309550-34309650 |
| chr8 | 34373750 | 34373850 | 901-Lng-B-T  | 185  | chr8:34373750-34373850 |
| chr8 | 34409250 | 34409350 | 846-Lng-A-T  | 673  | chr8:34409250-34409350 |
| chr8 | 34433550 | 34433650 | 1065-Lng-A-T | 57   | chr8:34433550-34433650 |
| chr8 | 34505550 | 34505650 | 1065-Lng-B-T | 62   | chr8:34505550-34505650 |
| chr8 | 34522650 | 34522750 | 901-Lng-A-T  | 107  | chr8:34522650-34522750 |
| chr8 | 34615950 | 34616050 | 1223-Lng-B-T | 53   | chr8:34615950-34616050 |
| chr8 | 34688850 | 34688950 | 1223-Lng-D-T | 159  | chr8:34688850-34688950 |
| chr8 | 34717450 | 34717550 | 901-Lng-B-T  | 209  | chr8:34717450-34717550 |
| chr8 | 34720550 | 34720650 | 1223-Lng-C-T | 53   | chr8:34720550-34720650 |
| chr8 | 34754250 | 34754350 | 901-Lng-A-T  | 121  | chr8:34754250-34754350 |
| chr8 | 34862750 | 34862850 | 1100-Lng-A-T | 63   | chr8:34862750-34862850 |
| chr8 | 34919050 | 34919150 | 1065-Lng-A-T | 34   | chr8:34919050-34919150 |
| chr8 | 34921550 | 34921650 | 1065-Lng-B-T | 87   | chr8:34921550-34921650 |
| chr8 | 34928150 | 34928250 | 1100-Lng-A-T | 650  | chr8:34928150-34928250 |
| chr8 | 34962550 | 34962650 | 1223-Lng-A-T | 2274 | chr8:34962550-34962650 |
| chr8 | 35022250 | 35022350 | 1065-Lng-A-T | 35   | chr8:35022250-35022350 |
| chr8 | 35086550 | 35086650 | 1100-Lng-A-T | 150  | chr8:35086550-35086650 |
| chr8 | 35199550 | 35199650 | 1100-Lng-A-T | 2036 | chr8:35199550-35199650 |
| chr8 | 35210550 | 35210650 | 846-Lng-A-T  | 109  | chr8:35210550-35210650 |
| chr8 | 35296850 | 35296950 | 1152-Lng-A-T | 118  | chr8:35296850-35296950 |

**Table S2: SB Insertion regions**

|      |          |          |              |      |                        |
|------|----------|----------|--------------|------|------------------------|
| chr8 | 35538050 | 35538150 | 1004-Lng-A-T | 76   | chr8:35538050-35538150 |
| chr8 | 35563850 | 35563950 | 901-Lng-A-T  | 140  | chr8:35563850-35563950 |
| chr8 | 35602650 | 35602750 | 1274-Lng-A-T | 82   | chr8:35602650-35602750 |
| chr8 | 35629150 | 35629250 | 1065-Lng-B-T | 135  | chr8:35629150-35629250 |
| chr8 | 35742850 | 35742950 | 1090-Lng-A-T | 74   | chr8:35742850-35742950 |
| chr8 | 35884050 | 35884150 | 1004-Lng-A-T | 57   | chr8:35884050-35884150 |
| chr8 | 35990150 | 35990250 | 901-Lng-D-T  | 140  | chr8:35990150-35990250 |
| chr8 | 36095450 | 36095550 | 1065-Lng-A-T | 93   | chr8:36095450-36095550 |
| chr8 | 36133750 | 36133850 | 1065-Lng-B-T | 44   | chr8:36133750-36133850 |
| chr8 | 36270350 | 36270450 | 1065-Lng-B-T | 69   | chr8:36270350-36270450 |
| chr8 | 36404550 | 36404650 | 1223-Lng-B-T | 63   | chr8:36404550-36404650 |
| chr8 | 36555950 | 36556050 | 1223-Lng-A-T | 277  | chr8:36555950-36556050 |
| chr8 | 36581650 | 36581750 | 846-Lng-A-T  | 52   | chr8:36581650-36581750 |
| chr8 | 36673050 | 36673150 | 1223-Lng-A-T | 82   | chr8:36673050-36673150 |
| chr8 | 36681250 | 36681350 | 1065-Lng-B-T | 54   | chr8:36681250-36681350 |
| chr8 | 36751250 | 36751350 | 1152-Lng-A-T | 110  | chr8:36751250-36751350 |
| chr8 | 36774450 | 36774550 | 846-Lng-A-T  | 43   | chr8:36774450-36774550 |
| chr8 | 37256650 | 37256750 | 1151-Lng-A-T | 60   | chr8:37256650-37256750 |
| chr8 | 37257550 | 37257650 | 846-Lng-A-T  | 154  | chr8:37257550-37257650 |
| chr8 | 37665150 | 37665250 | 846-Lng-A-T  | 337  | chr8:37665150-37665250 |
| chr8 | 37670150 | 37670250 | 1223-Lng-C-T | 96   | chr8:37670150-37670250 |
| chr8 | 37699950 | 37700050 | 1151-Lng-A-T | 104  | chr8:37699950-37700050 |
| chr8 | 37710550 | 37710650 | 1274-Lng-A-T | 52   | chr8:37710550-37710650 |
| chr8 | 37742450 | 37742550 | 1065-Lng-A-T | 47   | chr8:37742450-37742550 |
| chr8 | 37778050 | 37778150 | 1274-Lng-A-T | 85   | chr8:37778050-37778150 |
| chr8 | 37878550 | 37878650 | 1090-Lng-B-T | 244  | chr8:37878550-37878650 |
| chr8 | 37893850 | 37893950 | 1223-Lng-D-T | 49   | chr8:37893850-37893950 |
| chr8 | 37960750 | 37960850 | 1090-Lng-A-T | 81   | chr8:37960750-37960850 |
| chr8 | 38030750 | 38030850 | 1090-Lng-A-T | 53   | chr8:38030750-38030850 |
| chr8 | 38094550 | 38094650 | 1072-Lng-A-T | 64   | chr8:38094550-38094650 |
| chr8 | 38233850 | 38233950 | 1072-Lng-A-T | 108  | chr8:38233850-38233950 |
| chr8 | 38324750 | 38324850 | 1065-Lng-B-T | 57   | chr8:38324750-38324850 |
| chr8 | 38331850 | 38331950 | 1090-Lng-A-T | 51   | chr8:38331850-38331950 |
| chr8 | 38630350 | 38630450 | 1223-Lng-C-T | 53   | chr8:38630350-38630450 |
| chr8 | 38686650 | 38686750 | 901-Lng-A-T  | 180  | chr8:38686650-38686750 |
| chr8 | 38721550 | 38721650 | 1151-Lng-A-T | 206  | chr8:38721550-38721650 |
| chr8 | 38735550 | 38735650 | 1004-Lng-A-T | 53   | chr8:38735550-38735650 |
| chr8 | 38801650 | 38801750 | 846-Lng-A-T  | 2032 | chr8:38801650-38801750 |
| chr8 | 38867550 | 38867650 | 1004-Lng-A-T | 69   | chr8:38867550-38867650 |
| chr8 | 38964750 | 38964850 | 901-Lng-A-T  | 55   | chr8:38964750-38964850 |
| chr8 | 39083250 | 39083350 | 1090-Lng-A-T | 49   | chr8:39083250-39083350 |
| chr8 | 39225450 | 39225550 | 1065-Lng-B-T | 45   | chr8:39225450-39225550 |
| chr8 | 39261450 | 39261550 | 901-Lng-A-T  | 96   | chr8:39261450-39261550 |
| chr8 | 39265350 | 39265450 | 901-Lng-B-T  | 169  | chr8:39265350-39265450 |
| chr8 | 39323150 | 39323250 | 1152-Lng-A-T | 67   | chr8:39323150-39323250 |
| chr8 | 39384850 | 39384950 | 1274-Lng-A-T | 79   | chr8:39384850-39384950 |



**Table S2: SB Insertion regions**

|      |          |          |              |     |                        |
|------|----------|----------|--------------|-----|------------------------|
| chr8 | 39393450 | 39393550 | 1065-Lng-B-T | 53  | chr8:39393450-39393550 |
| chr8 | 39399750 | 39399850 | 1065-Lng-B-T | 144 | chr8:39399750-39399850 |
| chr8 | 39696050 | 39696150 | 1188-Lng-A-T | 38  | chr8:39696050-39696150 |
| chr8 | 39717150 | 39717250 | 1090-Lng-A-T | 61  | chr8:39717150-39717250 |
| chr8 | 39743050 | 39743150 | 1151-Lng-A-T | 60  | chr8:39743050-39743150 |
| chr8 | 39959750 | 39959850 | 901-Lng-A-T  | 75  | chr8:39959750-39959850 |
| chr8 | 40073850 | 40073950 | 1072-Lng-A-T | 136 | chr8:40073850-40073950 |
| chr8 | 40079150 | 40079250 | 1223-Lng-A-T | 185 | chr8:40079150-40079250 |
| chr8 | 40086350 | 40086450 | 1100-Lng-A-T | 52  | chr8:40086350-40086450 |
| chr8 | 40120350 | 40120450 | 1152-Lng-A-T | 59  | chr8:40120350-40120450 |
| chr8 | 40134850 | 40134950 | 1090-Lng-B-T | 405 | chr8:40134850-40134950 |
| chr8 | 40166150 | 40166250 | 901-Lng-A-T  | 99  | chr8:40166150-40166250 |
| chr8 | 40276750 | 40276850 | 1065-Lng-A-T | 45  | chr8:40276750-40276850 |
| chr8 | 40361950 | 40362050 | 1274-Lng-A-T | 180 | chr8:40361950-40362050 |
| chr8 | 40388550 | 40388650 | 1167-Lng-A-T | 82  | chr8:40388550-40388650 |
| chr8 | 40488050 | 40488150 | 1188-Lng-A-T | 34  | chr8:40488050-40488150 |
| chr8 | 40495550 | 40495650 | 1065-Lng-C-T | 109 | chr8:40495550-40495650 |
| chr8 | 40677850 | 40677950 | 1223-Lng-B-T | 43  | chr8:40677850-40677950 |
| chr8 | 41033350 | 41033450 | 1274-Lng-A-T | 123 | chr8:41033350-41033450 |
| chr8 | 41056750 | 41056850 | 901-Lng-C-T  | 133 | chr8:41056750-41056850 |
| chr8 | 41071150 | 41071250 | 1151-Lng-A-T | 57  | chr8:41071150-41071250 |
| chr8 | 41208250 | 41208350 | 846-Lng-A-T  | 58  | chr8:41208250-41208350 |
| chr8 | 41400450 | 41400550 | 1072-Lng-A-T | 67  | chr8:41400450-41400550 |
| chr8 | 41403350 | 41403450 | 1065-Lng-B-T | 40  | chr8:41403350-41403450 |
| chr8 | 41406250 | 41406350 | 1223-Lng-C-T | 44  | chr8:41406250-41406350 |
| chr8 | 41541850 | 41541950 | 901-Lng-D-T  | 38  | chr8:41541850-41541950 |
| chr8 | 41580250 | 41580350 | 1065-Lng-B-T | 54  | chr8:41580250-41580350 |
| chr8 | 41580650 | 41580750 | 901-Lng-D-T  | 599 | chr8:41580650-41580750 |
| chr8 | 41599450 | 41599550 | 1065-Lng-B-T | 56  | chr8:41599450-41599550 |
| chr8 | 41609650 | 41609750 | 846-Lng-A-T  | 87  | chr8:41609650-41609750 |
| chr8 | 41631950 | 41632050 | 1100-Lng-A-T | 73  | chr8:41631950-41632050 |
| chr8 | 41633650 | 41633750 | 1065-Lng-A-T | 46  | chr8:41633650-41633750 |
| chr8 | 41744850 | 41744950 | 901-Lng-C-T  | 105 | chr8:41744850-41744950 |
| chr8 | 41760750 | 41760850 | 1065-Lng-A-T | 66  | chr8:41760750-41760850 |
| chr8 | 41852450 | 41852550 | 1100-Lng-A-T | 121 | chr8:41852450-41852550 |
| chr8 | 41985350 | 41985450 | 901-Lng-B-T  | 51  | chr8:41985350-41985450 |
| chr8 | 42074550 | 42074650 | 1223-Lng-B-T | 359 | chr8:42074550-42074650 |
| chr8 | 42190550 | 42190650 | 1065-Lng-C-T | 94  | chr8:42190550-42190650 |
| chr8 | 42201950 | 42202050 | 1100-Lng-A-T | 85  | chr8:42201950-42202050 |
| chr8 | 42276250 | 42276350 | 1004-Lng-A-T | 66  | chr8:42276250-42276350 |
| chr8 | 42327650 | 42327750 | 1188-Lng-A-T | 62  | chr8:42327650-42327750 |
| chr8 | 42342350 | 42342450 | 1167-Lng-A-T | 97  | chr8:42342350-42342450 |
| chr8 | 42374850 | 42374950 | 1223-Lng-B-T | 38  | chr8:42374850-42374950 |
| chr8 | 42377350 | 42377450 | 1223-Lng-D-T | 40  | chr8:42377350-42377450 |
| chr8 | 42389450 | 42389550 | 901-Lng-B-T  | 182 | chr8:42389450-42389550 |
| chr8 | 42395050 | 42395150 | 901-Lng-C-T  | 45  | chr8:42395050-42395150 |

**Table S2: SB Insertion regions**

|      |          |          |              |      |                        |
|------|----------|----------|--------------|------|------------------------|
| chr8 | 42423550 | 42423650 | 1223-Lng-C-T | 57   | chr8:42423550-42423650 |
| chr8 | 42449350 | 42449450 | 1072-Lng-A-T | 55   | chr8:42449350-42449450 |
| chr8 | 42461950 | 42462050 | 1223-Lng-A-T | 1484 | chr8:42461950-42462050 |
| chr8 | 42478350 | 42478450 | 846-Lng-A-T  | 56   | chr8:42478350-42478450 |
| chr8 | 42483650 | 42483750 | 1100-Lng-B-T | 54   | chr8:42483650-42483750 |
| chr8 | 42485550 | 42485650 | 1065-Lng-B-T | 88   | chr8:42485550-42485650 |
| chr8 | 42518450 | 42518550 | 1223-Lng-C-T | 49   | chr8:42518450-42518550 |
| chr8 | 42673250 | 42673350 | 1090-Lng-A-T | 76   | chr8:42673250-42673350 |
| chr8 | 42755250 | 42755350 | 1090-Lng-A-T | 46   | chr8:42755250-42755350 |
| chr8 | 42866150 | 42866250 | 1223-Lng-B-T | 116  | chr8:42866150-42866250 |
| chr8 | 43032750 | 43032850 | 1223-Lng-B-T | 143  | chr8:43032750-43032850 |
| chr8 | 43043050 | 43043150 | 1188-Lng-A-T | 169  | chr8:43043050-43043150 |
| chr8 | 43223150 | 43223250 | 1004-Lng-A-T | 49   | chr8:43223150-43223250 |
| chr8 | 43399550 | 43399650 | 1167-Lng-A-T | 50   | chr8:43399550-43399650 |
| chr8 | 43461050 | 43461150 | 1090-Lng-A-T | 73   | chr8:43461050-43461150 |
| chr8 | 43462650 | 43462750 | 1223-Lng-B-T | 34   | chr8:43462650-43462750 |
| chr8 | 43502650 | 43502750 | 901-Lng-C-T  | 28   | chr8:43502650-43502750 |
| chr8 | 43530050 | 43530150 | 901-Lng-A-T  | 435  | chr8:43530050-43530150 |
| chr8 | 43592550 | 43592650 | 1223-Lng-A-T | 286  | chr8:43592550-43592650 |
| chr8 | 43602450 | 43602550 | 1223-Lng-A-T | 111  | chr8:43602450-43602550 |
| chr8 | 43686350 | 43686450 | 1167-Lng-A-T | 82   | chr8:43686350-43686450 |
| chr8 | 43690550 | 43690650 | 1004-Lng-A-T | 155  | chr8:43690550-43690650 |
| chr8 | 43853150 | 43853250 | 1065-Lng-B-T | 40   | chr8:43853150-43853250 |
| chr8 | 43900550 | 43900650 | 901-Lng-A-T  | 75   | chr8:43900550-43900650 |
| chr8 | 44187850 | 44187950 | 1152-Lng-A-T | 36   | chr8:44187850-44187950 |
| chr8 | 44722250 | 44722350 | 1274-Lng-A-T | 77   | chr8:44722250-44722350 |
| chr8 | 44762750 | 44762850 | 1100-Lng-B-T | 61   | chr8:44762750-44762850 |
| chr8 | 44839750 | 44839850 | 1223-Lng-B-T | 44   | chr8:44839750-44839850 |
| chr8 | 45067250 | 45067350 | 1072-Lng-A-T | 51   | chr8:45067250-45067350 |
| chr8 | 45112450 | 45112550 | 1004-Lng-A-T | 66   | chr8:45112450-45112550 |
| chr8 | 45291250 | 45291350 | 1065-Lng-B-T | 53   | chr8:45291250-45291350 |
| chr8 | 45381550 | 45381650 | 901-Lng-C-T  | 42   | chr8:45381550-45381650 |
| chr8 | 45723550 | 45723650 | 1274-Lng-A-T | 92   | chr8:45723550-45723650 |
| chr8 | 45931350 | 45931450 | 1090-Lng-A-T | 93   | chr8:45931350-45931450 |
| chr8 | 46029650 | 46029750 | 1152-Lng-A-T | 120  | chr8:46029650-46029750 |
| chr8 | 46078350 | 46078450 | 1151-Lng-A-T | 163  | chr8:46078350-46078450 |
| chr8 | 46083350 | 46083450 | 1090-Lng-A-T | 64   | chr8:46083350-46083450 |
| chr8 | 46104950 | 46105050 | 846-Lng-A-T  | 54   | chr8:46104950-46105050 |
| chr8 | 46111450 | 46111550 | 1090-Lng-A-T | 152  | chr8:46111450-46111550 |
| chr8 | 46115850 | 46115950 | 1065-Lng-A-T | 48   | chr8:46115850-46115950 |
| chr8 | 46123050 | 46123150 | 1152-Lng-A-T | 40   | chr8:46123050-46123150 |
| chr8 | 46257550 | 46257650 | 1065-Lng-B-T | 63   | chr8:46257550-46257650 |
| chr8 | 46349550 | 46349650 | 1274-Lng-A-T | 55   | chr8:46349550-46349650 |
| chr8 | 46352750 | 46352850 | 901-Lng-B-T  | 109  | chr8:46352750-46352850 |
| chr8 | 46465550 | 46465650 | 1072-Lng-A-T | 49   | chr8:46465550-46465650 |
| chr8 | 46692250 | 46692350 | 1151-Lng-A-T | 433  | chr8:46692250-46692350 |

**Table S2: SB Insertion regions**

|      |          |          |              |      |                        |
|------|----------|----------|--------------|------|------------------------|
| chr8 | 46714050 | 46714150 | 901-Lng-C-T  | 33   | chr8:46714050-46714150 |
| chr8 | 46719250 | 46719350 | 1151-Lng-A-T | 74   | chr8:46719250-46719350 |
| chr8 | 46775550 | 46775650 | 1274-Lng-A-T | 105  | chr8:46775550-46775650 |
| chr8 | 46943750 | 46943850 | 1152-Lng-A-T | 94   | chr8:46943750-46943850 |
| chr8 | 47044750 | 47044850 | 901-Lng-A-T  | 70   | chr8:47044750-47044850 |
| chr8 | 47074850 | 47074950 | 1274-Lng-A-T | 418  | chr8:47074850-47074950 |
| chr8 | 47080650 | 47080750 | 1004-Lng-A-T | 163  | chr8:47080650-47080750 |
| chr8 | 47222350 | 47222450 | 1100-Lng-A-T | 93   | chr8:47222350-47222450 |
| chr8 | 47239950 | 47240050 | 1223-Lng-C-T | 190  | chr8:47239950-47240050 |
| chr8 | 47286450 | 47286550 | 1065-Lng-A-T | 50   | chr8:47286450-47286550 |
| chr8 | 47365350 | 47365450 | 901-Lng-C-T  | 43   | chr8:47365350-47365450 |
| chr8 | 47570350 | 47570450 | 1065-Lng-A-T | 63   | chr8:47570350-47570450 |
| chr8 | 47579850 | 47579950 | 1274-Lng-A-T | 176  | chr8:47579850-47579950 |
| chr8 | 47722350 | 47722450 | 901-Lng-C-T  | 210  | chr8:47722350-47722450 |
| chr8 | 47839750 | 47839850 | 1274-Lng-A-T | 58   | chr8:47839750-47839850 |
| chr8 | 47874850 | 47874950 | 1223-Lng-C-T | 45   | chr8:47874850-47874950 |
| chr8 | 47905550 | 47905650 | 1004-Lng-A-T | 77   | chr8:47905550-47905650 |
| chr8 | 47907150 | 47907250 | 1223-Lng-C-T | 627  | chr8:47907150-47907250 |
| chr8 | 47908250 | 47908350 | 1065-Lng-A-T | 37   | chr8:47908250-47908350 |
| chr8 | 47928950 | 47929050 | 1065-Lng-C-T | 252  | chr8:47928950-47929050 |
| chr8 | 48037750 | 48037850 | 1065-Lng-C-T | 70   | chr8:48037750-48037850 |
| chr8 | 48059050 | 48059150 | 901-Lng-A-T  | 79   | chr8:48059050-48059150 |
| chr8 | 48197550 | 48197650 | 1072-Lng-A-T | 49   | chr8:48197550-48197650 |
| chr8 | 48300150 | 48300250 | 1223-Lng-A-T | 171  | chr8:48300150-48300250 |
| chr8 | 48314650 | 48314750 | 1090-Lng-A-T | 96   | chr8:48314650-48314750 |
| chr8 | 48363650 | 48363750 | 901-Lng-C-T  | 151  | chr8:48363650-48363750 |
| chr8 | 48410550 | 48410650 | 901-Lng-C-T  | 28   | chr8:48410550-48410650 |
| chr8 | 48424550 | 48424650 | 1072-Lng-A-T | 181  | chr8:48424550-48424650 |
| chr8 | 48884550 | 48884650 | 1004-Lng-A-T | 51   | chr8:48884550-48884650 |
| chr8 | 48948850 | 48948950 | 1090-Lng-B-T | 71   | chr8:48948850-48948950 |
| chr8 | 48985350 | 48985450 | 1188-Lng-A-T | 34   | chr8:48985350-48985450 |
| chr8 | 49006250 | 49006350 | 1090-Lng-A-T | 68   | chr8:49006250-49006350 |
| chr8 | 49009850 | 49009950 | 901-Lng-D-T  | 1114 | chr8:49009850-49009950 |
| chr8 | 49029550 | 49029650 | 846-Lng-A-T  | 84   | chr8:49029550-49029650 |
| chr8 | 49569350 | 49569450 | 901-Lng-B-T  | 38   | chr8:49569350-49569450 |
| chr8 | 49645050 | 49645150 | 846-Lng-A-T  | 111  | chr8:49645050-49645150 |
| chr8 | 49686450 | 49686550 | 846-Lng-A-T  | 48   | chr8:49686450-49686550 |
| chr8 | 49865650 | 49865750 | 901-Lng-C-T  | 76   | chr8:49865650-49865750 |
| chr8 | 49964950 | 49965050 | 1100-Lng-A-T | 80   | chr8:49964950-49965050 |
| chr8 | 50002250 | 50002350 | 1188-Lng-A-T | 36   | chr8:50002250-50002350 |
| chr8 | 50027450 | 50027550 | 1065-Lng-C-T | 2321 | chr8:50027450-50027550 |
| chr8 | 50063550 | 50063650 | 1090-Lng-A-T | 92   | chr8:50063550-50063650 |
| chr8 | 50142050 | 50142150 | 1223-Lng-B-T | 60   | chr8:50142050-50142150 |
| chr8 | 50155850 | 50155950 | 1065-Lng-A-T | 127  | chr8:50155850-50155950 |
| chr8 | 50437350 | 50437450 | 1223-Lng-A-T | 152  | chr8:50437350-50437450 |
| chr8 | 50452750 | 50452850 | 901-Lng-C-T  | 35   | chr8:50452750-50452850 |

**Table S2: SB Insertion regions**

|      |          |          |              |      |                        |
|------|----------|----------|--------------|------|------------------------|
| chr8 | 50480750 | 50480850 | 901-Lng-B-T  | 180  | chr8:50480750-50480850 |
| chr8 | 50493750 | 50493850 | 1090-Lng-A-T | 112  | chr8:50493750-50493850 |
| chr8 | 50527750 | 50527850 | 846-Lng-A-T  | 266  | chr8:50527750-50527850 |
| chr8 | 50555550 | 50555650 | 1090-Lng-A-T | 53   | chr8:50555550-50555650 |
| chr8 | 50563050 | 50563150 | 1188-Lng-A-T | 193  | chr8:50563050-50563150 |
| chr8 | 50580550 | 50580650 | 901-Lng-D-T  | 1046 | chr8:50580550-50580650 |
| chr8 | 50637850 | 50637950 | 1065-Lng-B-T | 43   | chr8:50637850-50637950 |
| chr8 | 50728750 | 50728850 | 1100-Lng-B-T | 51   | chr8:50728750-50728850 |
| chr8 | 51074750 | 51074850 | 901-Lng-A-T  | 51   | chr8:51074750-51074850 |
| chr8 | 51075250 | 51075350 | 1065-Lng-C-T | 86   | chr8:51075250-51075350 |
| chr8 | 51151450 | 51151550 | 1072-Lng-A-T | 51   | chr8:51151450-51151550 |
| chr8 | 51230850 | 51230950 | 1100-Lng-A-T | 74   | chr8:51230850-51230950 |
| chr8 | 51371450 | 51371550 | 1065-Lng-B-T | 54   | chr8:51371450-51371550 |
| chr8 | 51420950 | 51421050 | 901-Lng-D-T  | 41   | chr8:51420950-51421050 |
| chr8 | 51621750 | 51621850 | 1065-Lng-A-T | 92   | chr8:51621750-51621850 |
| chr8 | 51703850 | 51703950 | 901-Lng-C-T  | 82   | chr8:51703850-51703950 |
| chr8 | 51760550 | 51760650 | 1223-Lng-A-T | 307  | chr8:51760550-51760650 |
| chr8 | 51833550 | 51833650 | 1152-Lng-A-T | 31   | chr8:51833550-51833650 |
| chr8 | 51921750 | 51921850 | 1090-Lng-B-T | 162  | chr8:51921750-51921850 |
| chr8 | 52161950 | 52162050 | 1065-Lng-A-T | 44   | chr8:52161950-52162050 |
| chr8 | 52395050 | 52395150 | 1072-Lng-A-T | 58   | chr8:52395050-52395150 |
| chr8 | 52565750 | 52565850 | 1100-Lng-A-T | 83   | chr8:52565750-52565850 |
| chr8 | 52687150 | 52687250 | 901-Lng-B-T  | 148  | chr8:52687150-52687250 |
| chr8 | 52803950 | 52804050 | 1223-Lng-D-T | 47   | chr8:52803950-52804050 |
| chr8 | 52813850 | 52813950 | 1065-Lng-C-T | 72   | chr8:52813850-52813950 |
| chr8 | 52857950 | 52858050 | 901-Lng-C-T  | 97   | chr8:52857950-52858050 |
| chr8 | 52983850 | 52983950 | 1223-Lng-A-T | 104  | chr8:52983850-52983950 |
| chr8 | 52983850 | 52983950 | 1065-Lng-C-T | 64   | chr8:52983850-52983950 |
| chr8 | 53003250 | 53003350 | 1065-Lng-B-T | 116  | chr8:53003250-53003350 |
| chr8 | 53108450 | 53108550 | 1151-Lng-A-T | 57   | chr8:53108450-53108550 |
| chr8 | 53143550 | 53143650 | 1151-Lng-A-T | 56   | chr8:53143550-53143650 |
| chr8 | 53188650 | 53188750 | 1274-Lng-A-T | 57   | chr8:53188650-53188750 |
| chr8 | 53237850 | 53237950 | 1223-Lng-A-T | 73   | chr8:53237850-53237950 |
| chr8 | 53255950 | 53256050 | 1274-Lng-A-T | 177  | chr8:53255950-53256050 |
| chr8 | 53331950 | 53332050 | 1065-Lng-B-T | 57   | chr8:53331950-53332050 |
| chr8 | 53458750 | 53458850 | 1152-Lng-A-T | 65   | chr8:53458750-53458850 |
| chr8 | 53471950 | 53472050 | 1223-Lng-B-T | 62   | chr8:53471950-53472050 |
| chr8 | 53690650 | 53690750 | 1152-Lng-A-T | 61   | chr8:53690650-53690750 |
| chr8 | 53850450 | 53850550 | 1223-Lng-B-T | 41   | chr8:53850450-53850550 |
| chr8 | 53893850 | 53893950 | 901-Lng-B-T  | 185  | chr8:53893850-53893950 |
| chr8 | 53903750 | 53903850 | 1223-Lng-A-T | 106  | chr8:53903750-53903850 |
| chr8 | 54016850 | 54016950 | 1223-Lng-A-T | 156  | chr8:54016850-54016950 |
| chr8 | 54259150 | 54259250 | 846-Lng-A-T  | 129  | chr8:54259150-54259250 |
| chr8 | 54270050 | 54270150 | 1065-Lng-B-T | 119  | chr8:54270050-54270150 |
| chr8 | 54413750 | 54413850 | 1152-Lng-A-T | 32   | chr8:54413750-54413850 |
| chr8 | 54533750 | 54533850 | 1152-Lng-A-T | 105  | chr8:54533750-54533850 |

**Table S2: SB Insertion regions**

|      |          |          |              |      |                        |
|------|----------|----------|--------------|------|------------------------|
| chr8 | 54658350 | 54658450 | 1065-Lng-B-T | 172  | chr8:54658350-54658450 |
| chr8 | 54753450 | 54753550 | 1223-Lng-C-T | 94   | chr8:54753450-54753550 |
| chr8 | 54767450 | 54767550 | 1090-Lng-A-T | 111  | chr8:54767450-54767550 |
| chr8 | 54823550 | 54823650 | 1004-Lng-A-T | 146  | chr8:54823550-54823650 |
| chr8 | 55034950 | 55035050 | 1188-Lng-A-T | 195  | chr8:55034950-55035050 |
| chr8 | 55325950 | 55326050 | 1188-Lng-A-T | 42   | chr8:55325950-55326050 |
| chr8 | 55348250 | 55348350 | 1223-Lng-B-T | 45   | chr8:55348250-55348350 |
| chr8 | 55461950 | 55462050 | 1151-Lng-A-T | 270  | chr8:55461950-55462050 |
| chr8 | 55611350 | 55611450 | 1223-Lng-D-T | 46   | chr8:55611350-55611450 |
| chr8 | 55753650 | 55753750 | 901-Lng-B-T  | 224  | chr8:55753650-55753750 |
| chr8 | 55797650 | 55797750 | 1223-Lng-A-T | 823  | chr8:55797650-55797750 |
| chr8 | 56041350 | 56041450 | 1100-Lng-A-T | 68   | chr8:56041350-56041450 |
| chr8 | 56058250 | 56058350 | 1223-Lng-D-T | 46   | chr8:56058250-56058350 |
| chr8 | 56079350 | 56079450 | 1065-Lng-B-T | 56   | chr8:56079350-56079450 |
| chr8 | 56127750 | 56127850 | 1151-Lng-A-T | 57   | chr8:56127750-56127850 |
| chr8 | 58146150 | 58146250 | 1004-Lng-A-T | 75   | chr8:58146150-58146250 |
| chr8 | 58170350 | 58170450 | 1100-Lng-A-T | 142  | chr8:58170350-58170450 |
| chr8 | 58281350 | 58281450 | 1090-Lng-A-T | 47   | chr8:58281350-58281450 |
| chr8 | 58414850 | 58414950 | 901-Lng-A-T  | 536  | chr8:58414850-58414950 |
| chr8 | 58898250 | 58898350 | 1167-Lng-A-T | 77   | chr8:58898250-58898350 |
| chr8 | 58917950 | 58918050 | 1004-Lng-A-T | 92   | chr8:58917950-58918050 |
| chr8 | 59020150 | 59020250 | 1004-Lng-A-T | 90   | chr8:59020150-59020250 |
| chr8 | 59065550 | 59065650 | 1167-Lng-A-T | 49   | chr8:59065550-59065650 |
| chr8 | 59069450 | 59069550 | 901-Lng-C-T  | 67   | chr8:59069450-59069550 |
| chr8 | 59212950 | 59213050 | 1004-Lng-A-T | 85   | chr8:59212950-59213050 |
| chr8 | 59338750 | 59338850 | 1188-Lng-A-T | 37   | chr8:59338750-59338850 |
| chr8 | 59394250 | 59394350 | 901-Lng-A-T  | 87   | chr8:59394250-59394350 |
| chr8 | 59690750 | 59690850 | 1090-Lng-A-T | 61   | chr8:59690750-59690850 |
| chr8 | 59707350 | 59707450 | 1223-Lng-C-T | 49   | chr8:59707350-59707450 |
| chr8 | 59778650 | 59778750 | 1065-Lng-C-T | 81   | chr8:59778650-59778750 |
| chr8 | 59808650 | 59808750 | 901-Lng-B-T  | 36   | chr8:59808650-59808750 |
| chr8 | 59904950 | 59905050 | 846-Lng-A-T  | 958  | chr8:59904950-59905050 |
| chr8 | 60058850 | 60058950 | 901-Lng-A-T  | 66   | chr8:60058850-60058950 |
| chr8 | 60095050 | 60095150 | 1065-Lng-A-T | 60   | chr8:60095050-60095150 |
| chr8 | 60724250 | 60724350 | 846-Lng-A-T  | 153  | chr8:60724250-60724350 |
| chr8 | 60846750 | 60846850 | 1065-Lng-B-T | 254  | chr8:60846750-60846850 |
| chr8 | 60848750 | 60848850 | 846-Lng-A-T  | 1056 | chr8:60848750-60848850 |
| chr8 | 60907650 | 60907750 | 1100-Lng-A-T | 69   | chr8:60907650-60907750 |
| chr8 | 61170950 | 61171050 | 901-Lng-A-T  | 85   | chr8:61170950-61171050 |
| chr8 | 61366050 | 61366150 | 1274-Lng-A-T | 172  | chr8:61366050-61366150 |
| chr8 | 61393350 | 61393450 | 1065-Lng-B-T | 82   | chr8:61393350-61393450 |
| chr8 | 61400850 | 61400950 | 1223-Lng-C-T | 43   | chr8:61400850-61400950 |
| chr8 | 61628450 | 61628550 | 1100-Lng-B-T | 62   | chr8:61628450-61628550 |
| chr8 | 61682550 | 61682650 | 1004-Lng-A-T | 63   | chr8:61682550-61682650 |
| chr8 | 61734650 | 61734750 | 901-Lng-A-T  | 73   | chr8:61734650-61734750 |
| chr8 | 61822750 | 61822850 | 1090-Lng-A-T | 92   | chr8:61822750-61822850 |

**Table S2: SB Insertion regions**

|      |          |          |              |      |                        |
|------|----------|----------|--------------|------|------------------------|
| chr8 | 61872650 | 61872750 | 1065-Lng-B-T | 40   | chr8:61872650-61872750 |
| chr8 | 62021450 | 62021550 | 1065-Lng-B-T | 40   | chr8:62021450-62021550 |
| chr8 | 62041150 | 62041250 | 1004-Lng-A-T | 60   | chr8:62041150-62041250 |
| chr8 | 62174750 | 62174850 | 1004-Lng-A-T | 122  | chr8:62174750-62174850 |
| chr8 | 62224450 | 62224550 | 1090-Lng-A-T | 105  | chr8:62224450-62224550 |
| chr8 | 62493350 | 62493450 | 901-Lng-B-T  | 90   | chr8:62493350-62493450 |
| chr8 | 62644150 | 62644250 | 1065-Lng-B-T | 66   | chr8:62644150-62644250 |
| chr8 | 62835050 | 62835150 | 1090-Lng-A-T | 88   | chr8:62835050-62835150 |
| chr8 | 62927550 | 62927650 | 1065-Lng-C-T | 81   | chr8:62927550-62927650 |
| chr8 | 63113650 | 63113750 | 1090-Lng-A-T | 53   | chr8:63113650-63113750 |
| chr8 | 63156050 | 63156150 | 1004-Lng-A-T | 141  | chr8:63156050-63156150 |
| chr8 | 63157950 | 63158050 | 1004-Lng-A-T | 407  | chr8:63157950-63158050 |
| chr8 | 63158350 | 63158450 | 846-Lng-A-T  | 99   | chr8:63158350-63158450 |
| chr8 | 63310350 | 63310450 | 1274-Lng-A-T | 62   | chr8:63310350-63310450 |
| chr8 | 63311150 | 63311250 | 1188-Lng-A-T | 37   | chr8:63311150-63311250 |
| chr8 | 63439750 | 63439850 | 1004-Lng-A-T | 50   | chr8:63439750-63439850 |
| chr8 | 63456050 | 63456150 | 1065-Lng-B-T | 41   | chr8:63456050-63456150 |
| chr8 | 63506450 | 63506550 | 1004-Lng-A-T | 76   | chr8:63506450-63506550 |
| chr8 | 63518050 | 63518150 | 1152-Lng-A-T | 206  | chr8:63518050-63518150 |
| chr8 | 63567350 | 63567450 | 1151-Lng-A-T | 169  | chr8:63567350-63567450 |
| chr8 | 63715550 | 63715650 | 1274-Lng-A-T | 190  | chr8:63715550-63715650 |
| chr8 | 63733150 | 63733250 | 1065-Lng-C-T | 72   | chr8:63733150-63733250 |
| chr8 | 63740950 | 63741050 | 1004-Lng-A-T | 351  | chr8:63740950-63741050 |
| chr8 | 63751550 | 63751650 | 1274-Lng-A-T | 89   | chr8:63751550-63751650 |
| chr8 | 63759050 | 63759150 | 846-Lng-A-T  | 125  | chr8:63759050-63759150 |
| chr8 | 63793550 | 63793650 | 1090-Lng-A-T | 617  | chr8:63793550-63793650 |
| chr8 | 63798750 | 63798850 | 1274-Lng-A-T | 2571 | chr8:63798750-63798850 |
| chr8 | 63800350 | 63800450 | 1223-Lng-C-T | 55   | chr8:63800350-63800450 |
| chr8 | 63861150 | 63861250 | 1004-Lng-A-T | 176  | chr8:63861150-63861250 |
| chr8 | 63904850 | 63904950 | 1223-Lng-D-T | 44   | chr8:63904850-63904950 |
| chr8 | 64717650 | 64717750 | 1065-Lng-A-T | 68   | chr8:64717650-64717750 |
| chr8 | 64989650 | 64989750 | 1274-Lng-A-T | 55   | chr8:64989650-64989750 |
| chr8 | 65146350 | 65146450 | 1065-Lng-A-T | 40   | chr8:65146350-65146450 |
| chr8 | 65179550 | 65179650 | 1065-Lng-B-T | 84   | chr8:65179550-65179650 |
| chr8 | 65563750 | 65563850 | 1004-Lng-A-T | 84   | chr8:65563750-65563850 |
| chr8 | 65603850 | 65603950 | 1065-Lng-B-T | 63   | chr8:65603850-65603950 |
| chr8 | 65603850 | 65603950 | 1065-Lng-A-T | 48   | chr8:65603850-65603950 |
| chr8 | 65729750 | 65729850 | 846-Lng-A-T  | 95   | chr8:65729750-65729850 |
| chr8 | 65915350 | 65915450 | 1151-Lng-A-T | 71   | chr8:65915350-65915450 |
| chr8 | 65971150 | 65971250 | 1152-Lng-A-T | 98   | chr8:65971150-65971250 |
| chr8 | 66058150 | 66058250 | 1223-Lng-B-T | 41   | chr8:66058150-66058250 |
| chr8 | 66507950 | 66508050 | 1004-Lng-A-T | 75   | chr8:66507950-66508050 |
| chr8 | 66601250 | 66601350 | 901-Lng-C-T  | 41   | chr8:66601250-66601350 |
| chr8 | 66663550 | 66663650 | 1004-Lng-A-T | 56   | chr8:66663550-66663650 |
| chr8 | 66839250 | 66839350 | 1274-Lng-A-T | 61   | chr8:66839250-66839350 |
| chr8 | 66888750 | 66888850 | 1004-Lng-A-T | 89   | chr8:66888750-66888850 |

**Table S2: SB Insertion regions**

|      |          |          |              |      |                        |
|------|----------|----------|--------------|------|------------------------|
| chr8 | 67068950 | 67069050 | 1090-Lng-A-T | 128  | chr8:67068950-67069050 |
| chr8 | 67226650 | 67226750 | 1004-Lng-A-T | 51   | chr8:67226650-67226750 |
| chr8 | 67269050 | 67269150 | 901-Lng-D-T  | 133  | chr8:67269050-67269150 |
| chr8 | 67332050 | 67332150 | 1065-Lng-A-T | 63   | chr8:67332050-67332150 |
| chr8 | 67345050 | 67345150 | 1065-Lng-A-T | 54   | chr8:67345050-67345150 |
| chr8 | 67587750 | 67587850 | 1100-Lng-A-T | 157  | chr8:67587750-67587850 |
| chr8 | 67716350 | 67716450 | 1065-Lng-B-T | 60   | chr8:67716350-67716450 |
| chr8 | 67912050 | 67912150 | 1090-Lng-A-T | 107  | chr8:67912050-67912150 |
| chr8 | 68143650 | 68143750 | 1223-Lng-C-T | 51   | chr8:68143650-68143750 |
| chr8 | 68222150 | 68222250 | 1072-Lng-A-T | 83   | chr8:68222150-68222250 |
| chr8 | 68236750 | 68236850 | 1004-Lng-A-T | 181  | chr8:68236750-68236850 |
| chr8 | 68325750 | 68325850 | 1151-Lng-A-T | 61   | chr8:68325750-68325850 |
| chr8 | 68600750 | 68600850 | 1004-Lng-A-T | 94   | chr8:68600750-68600850 |
| chr8 | 68662950 | 68663050 | 1065-Lng-C-T | 126  | chr8:68662950-68663050 |
| chr8 | 69017250 | 69017350 | 1065-Lng-C-T | 66   | chr8:69017250-69017350 |
| chr8 | 69057650 | 69057750 | 1152-Lng-A-T | 91   | chr8:69057650-69057750 |
| chr8 | 69111050 | 69111150 | 846-Lng-A-T  | 1886 | chr8:69111050-69111150 |
| chr8 | 69116850 | 69116950 | 1223-Lng-A-T | 293  | chr8:69116850-69116950 |
| chr8 | 69142550 | 69142650 | 846-Lng-A-T  | 144  | chr8:69142550-69142650 |
| chr8 | 69387950 | 69388050 | 1274-Lng-A-T | 202  | chr8:69387950-69388050 |
| chr8 | 69869550 | 69869650 | 1223-Lng-A-T | 550  | chr8:69869550-69869650 |
| chr8 | 69925850 | 69925950 | 1223-Lng-A-T | 107  | chr8:69925850-69925950 |
| chr8 | 69963950 | 69964050 | 1223-Lng-D-T | 41   | chr8:69963950-69964050 |
| chr8 | 70247050 | 70247150 | 1151-Lng-A-T | 443  | chr8:70247050-70247150 |
| chr8 | 70351350 | 70351450 | 901-Lng-A-T  | 197  | chr8:70351350-70351450 |
| chr8 | 70363150 | 70363250 | 1065-Lng-B-T | 43   | chr8:70363150-70363250 |
| chr8 | 70405450 | 70405550 | 1065-Lng-B-T | 87   | chr8:70405450-70405550 |
| chr8 | 70454650 | 70454750 | 1223-Lng-D-T | 127  | chr8:70454650-70454750 |
| chr8 | 70458050 | 70458150 | 1065-Lng-A-T | 91   | chr8:70458050-70458150 |
| chr8 | 70461550 | 70461650 | 1100-Lng-A-T | 133  | chr8:70461550-70461650 |
| chr8 | 70486350 | 70486450 | 1274-Lng-A-T | 52   | chr8:70486350-70486450 |
| chr8 | 70508350 | 70508450 | 1004-Lng-A-T | 95   | chr8:70508350-70508450 |
| chr8 | 70510950 | 70511050 | 1090-Lng-B-T | 320  | chr8:70510950-70511050 |
| chr8 | 70525650 | 70525750 | 1223-Lng-C-T | 48   | chr8:70525650-70525750 |
| chr8 | 70536350 | 70536450 | 1090-Lng-A-T | 55   | chr8:70536350-70536450 |
| chr8 | 70545550 | 70545650 | 1151-Lng-A-T | 58   | chr8:70545550-70545650 |
| chr8 | 70554250 | 70554350 | 1090-Lng-A-T | 52   | chr8:70554250-70554350 |
| chr8 | 70567950 | 70568050 | 1065-Lng-B-T | 90   | chr8:70567950-70568050 |
| chr8 | 70573450 | 70573550 | 901-Lng-C-T  | 61   | chr8:70573450-70573550 |
| chr8 | 70575450 | 70575550 | 1090-Lng-A-T | 59   | chr8:70575450-70575550 |
| chr8 | 70679550 | 70679650 | 1072-Lng-A-T | 52   | chr8:70679550-70679650 |
| chr8 | 70721250 | 70721350 | 1004-Lng-A-T | 51   | chr8:70721250-70721350 |
| chr8 | 70805750 | 70805850 | 1223-Lng-D-T | 232  | chr8:70805750-70805850 |
| chr8 | 70824250 | 70824350 | 901-Lng-C-T  | 104  | chr8:70824250-70824350 |
| chr8 | 70830450 | 70830550 | 1065-Lng-B-T | 43   | chr8:70830450-70830550 |
| chr8 | 70837050 | 70837150 | 901-Lng-B-T  | 135  | chr8:70837050-70837150 |

**Table S2: SB Insertion regions**

|      |          |          |              |      |                        |
|------|----------|----------|--------------|------|------------------------|
| chr8 | 70866250 | 70866350 | 1065-Lng-A-T | 88   | chr8:70866250-70866350 |
| chr8 | 70970250 | 70970350 | 901-Lng-C-T  | 210  | chr8:70970250-70970350 |
| chr8 | 70973750 | 70973850 | 901-Lng-B-T  | 135  | chr8:70973750-70973850 |
| chr8 | 70987250 | 70987350 | 901-Lng-C-T  | 164  | chr8:70987250-70987350 |
| chr8 | 71107750 | 71107850 | 1152-Lng-A-T | 70   | chr8:71107750-71107850 |
| chr8 | 71157350 | 71157450 | 1065-Lng-B-T | 59   | chr8:71157350-71157450 |
| chr8 | 71259550 | 71259650 | 1223-Lng-B-T | 189  | chr8:71259550-71259650 |
| chr8 | 71552350 | 71552450 | 1090-Lng-A-T | 67   | chr8:71552350-71552450 |
| chr8 | 71567350 | 71567450 | 1090-Lng-B-T | 736  | chr8:71567350-71567450 |
| chr8 | 71575150 | 71575250 | 1004-Lng-A-T | 1040 | chr8:71575150-71575250 |
| chr8 | 71633150 | 71633250 | 1188-Lng-A-T | 65   | chr8:71633150-71633250 |
| chr8 | 71649550 | 71649650 | 1274-Lng-A-T | 127  | chr8:71649550-71649650 |
| chr8 | 71679450 | 71679550 | 1004-Lng-A-T | 269  | chr8:71679450-71679550 |
| chr8 | 71707550 | 71707650 | 901-Lng-C-T  | 79   | chr8:71707550-71707650 |
| chr8 | 71850050 | 71850150 | 1223-Lng-B-T | 41   | chr8:71850050-71850150 |
| chr8 | 71891950 | 71892050 | 1065-Lng-B-T | 223  | chr8:71891950-71892050 |
| chr8 | 71897150 | 71897250 | 1065-Lng-A-T | 73   | chr8:71897150-71897250 |
| chr8 | 71900250 | 71900350 | 1065-Lng-B-T | 58   | chr8:71900250-71900350 |
| chr8 | 72107750 | 72107850 | 1065-Lng-A-T | 49   | chr8:72107750-72107850 |
| chr8 | 72139450 | 72139550 | 1223-Lng-D-T | 47   | chr8:72139450-72139550 |
| chr8 | 72295750 | 72295850 | 1065-Lng-A-T | 47   | chr8:72295750-72295850 |
| chr8 | 72415750 | 72415850 | 1188-Lng-A-T | 301  | chr8:72415750-72415850 |
| chr8 | 72482350 | 72482450 | 1274-Lng-A-T | 81   | chr8:72482350-72482450 |
| chr8 | 72491150 | 72491250 | 1152-Lng-A-T | 66   | chr8:72491150-72491250 |
| chr8 | 72503350 | 72503450 | 1100-Lng-A-T | 175  | chr8:72503350-72503450 |
| chr8 | 72536550 | 72536650 | 1065-Lng-A-T | 50   | chr8:72536550-72536650 |
| chr8 | 72547150 | 72547250 | 1274-Lng-A-T | 92   | chr8:72547150-72547250 |
| chr8 | 72577650 | 72577750 | 901-Lng-C-T  | 50   | chr8:72577650-72577750 |
| chr8 | 72579350 | 72579450 | 1274-Lng-A-T | 98   | chr8:72579350-72579450 |
| chr8 | 72700450 | 72700550 | 901-Lng-D-T  | 37   | chr8:72700450-72700550 |
| chr8 | 72707350 | 72707450 | 1065-Lng-B-T | 113  | chr8:72707350-72707450 |
| chr8 | 72745050 | 72745150 | 1065-Lng-B-T | 67   | chr8:72745050-72745150 |
| chr8 | 72761550 | 72761650 | 1065-Lng-A-T | 44   | chr8:72761550-72761650 |
| chr8 | 72830750 | 72830850 | 1100-Lng-A-T | 75   | chr8:72830750-72830850 |
| chr8 | 72915550 | 72915650 | 1223-Lng-A-T | 712  | chr8:72915550-72915650 |
| chr8 | 72966550 | 72966650 | 901-Lng-B-T  | 68   | chr8:72966550-72966650 |
| chr8 | 72982650 | 72982750 | 1065-Lng-C-T | 115  | chr8:72982650-72982750 |
| chr8 | 73048550 | 73048650 | 1167-Lng-A-T | 59   | chr8:73048550-73048650 |
| chr8 | 73069950 | 73070050 | 1274-Lng-A-T | 98   | chr8:73069950-73070050 |
| chr8 | 73164550 | 73164650 | 1090-Lng-A-T | 59   | chr8:73164550-73164650 |
| chr8 | 73199750 | 73199850 | 1223-Lng-B-T | 34   | chr8:73199750-73199850 |
| chr8 | 73525650 | 73525750 | 1223-Lng-C-T | 539  | chr8:73525650-73525750 |
| chr8 | 73870850 | 73870950 | 1065-Lng-A-T | 55   | chr8:73870850-73870950 |
| chr8 | 73891450 | 73891550 | 1004-Lng-A-T | 563  | chr8:73891450-73891550 |
| chr8 | 74007950 | 74008050 | 846-Lng-A-T  | 55   | chr8:74007950-74008050 |
| chr8 | 74677250 | 74677350 | 1151-Lng-A-T | 221  | chr8:74677250-74677350 |



**Table S2: SB Insertion regions**

|      |          |          |              |     |                        |
|------|----------|----------|--------------|-----|------------------------|
| chr8 | 74831250 | 74831350 | 1151-Lng-A-T | 63  | chr8:74831250-74831350 |
| chr8 | 74834950 | 74835050 | 901-Lng-A-T  | 105 | chr8:74834950-74835050 |
| chr8 | 74889550 | 74889650 | 1274-Lng-A-T | 61  | chr8:74889550-74889650 |
| chr8 | 74895050 | 74895150 | 901-Lng-C-T  | 43  | chr8:74895050-74895150 |
| chr8 | 75004250 | 75004350 | 1072-Lng-A-T | 196 | chr8:75004250-75004350 |
| chr8 | 75027450 | 75027550 | 1223-Lng-B-T | 48  | chr8:75027450-75027550 |
| chr8 | 75052350 | 75052450 | 1004-Lng-A-T | 93  | chr8:75052350-75052450 |
| chr8 | 75068050 | 75068150 | 1004-Lng-A-T | 330 | chr8:75068050-75068150 |
| chr8 | 75076050 | 75076150 | 901-Lng-D-T  | 74  | chr8:75076050-75076150 |
| chr8 | 75090550 | 75090650 | 1274-Lng-A-T | 128 | chr8:75090550-75090650 |
| chr8 | 75228450 | 75228550 | 1223-Lng-A-T | 456 | chr8:75228450-75228550 |
| chr8 | 75257450 | 75257550 | 1100-Lng-A-T | 482 | chr8:75257450-75257550 |
| chr8 | 75305350 | 75305450 | 1004-Lng-A-T | 55  | chr8:75305350-75305450 |
| chr8 | 75446550 | 75446650 | 901-Lng-B-T  | 192 | chr8:75446550-75446650 |
| chr8 | 75473050 | 75473150 | 846-Lng-A-T  | 86  | chr8:75473050-75473150 |
| chr8 | 75718350 | 75718450 | 901-Lng-C-T  | 56  | chr8:75718350-75718450 |
| chr8 | 75719150 | 75719250 | 1223-Lng-D-T | 49  | chr8:75719150-75719250 |
| chr8 | 75823850 | 75823950 | 901-Lng-A-T  | 450 | chr8:75823850-75823950 |
| chr8 | 75829950 | 75830050 | 1065-Lng-B-T | 54  | chr8:75829950-75830050 |
| chr8 | 75832650 | 75832750 | 901-Lng-A-T  | 61  | chr8:75832650-75832750 |
| chr8 | 75836550 | 75836650 | 901-Lng-A-T  | 88  | chr8:75836550-75836650 |
| chr8 | 75847650 | 75847750 | 1152-Lng-A-T | 109 | chr8:75847650-75847750 |
| chr8 | 75854850 | 75854950 | 1223-Lng-B-T | 42  | chr8:75854850-75854950 |
| chr8 | 76119650 | 76119750 | 901-Lng-C-T  | 79  | chr8:76119650-76119750 |
| chr8 | 76216850 | 76216950 | 1223-Lng-B-T | 284 | chr8:76216850-76216950 |
| chr8 | 76577450 | 76577550 | 1188-Lng-A-T | 64  | chr8:76577450-76577550 |
| chr8 | 76708250 | 76708350 | 1065-Lng-B-T | 40  | chr8:76708250-76708350 |
| chr8 | 76744050 | 76744150 | 901-Lng-D-T  | 248 | chr8:76744050-76744150 |
| chr8 | 76792250 | 76792350 | 901-Lng-A-T  | 82  | chr8:76792250-76792350 |
| chr8 | 76953550 | 76953650 | 1152-Lng-A-T | 129 | chr8:76953550-76953650 |
| chr8 | 77006050 | 77006150 | 1072-Lng-A-T | 73  | chr8:77006050-77006150 |
| chr8 | 77305950 | 77306050 | 1152-Lng-A-T | 80  | chr8:77305950-77306050 |
| chr8 | 77514350 | 77514450 | 1274-Lng-A-T | 72  | chr8:77514350-77514450 |
| chr8 | 77530450 | 77530550 | 901-Lng-C-T  | 48  | chr8:77530450-77530550 |
| chr8 | 77561350 | 77561450 | 1072-Lng-A-T | 64  | chr8:77561350-77561450 |
| chr8 | 77659950 | 77660050 | 1167-Lng-A-T | 72  | chr8:77659950-77660050 |
| chr8 | 77895950 | 77896050 | 1072-Lng-A-T | 83  | chr8:77895950-77896050 |
| chr8 | 77994250 | 77994350 | 901-Lng-A-T  | 120 | chr8:77994250-77994350 |
| chr8 | 78127350 | 78127450 | 1223-Lng-C-T | 47  | chr8:78127350-78127450 |
| chr8 | 78337450 | 78337550 | 1004-Lng-A-T | 75  | chr8:78337450-78337550 |
| chr8 | 78412550 | 78412650 | 1065-Lng-B-T | 73  | chr8:78412550-78412650 |
| chr8 | 78555950 | 78556050 | 1100-Lng-A-T | 54  | chr8:78555950-78556050 |
| chr8 | 78557650 | 78557750 | 901-Lng-C-T  | 272 | chr8:78557650-78557750 |
| chr8 | 78588050 | 78588150 | 1223-Lng-B-T | 256 | chr8:78588050-78588150 |
| chr8 | 78629850 | 78629950 | 901-Lng-C-T  | 160 | chr8:78629850-78629950 |
| chr8 | 78652650 | 78652750 | 1223-Lng-A-T | 155 | chr8:78652650-78652750 |

**Table S2: SB Insertion regions**

|      |          |          |              |      |                        |
|------|----------|----------|--------------|------|------------------------|
| chr8 | 79428950 | 79429050 | 1072-Lng-A-T | 63   | chr8:79428950-79429050 |
| chr8 | 79472850 | 79472950 | 1090-Lng-B-T | 256  | chr8:79472850-79472950 |
| chr8 | 79478250 | 79478350 | 901-Lng-A-T  | 104  | chr8:79478250-79478350 |
| chr8 | 79489750 | 79489850 | 1223-Lng-A-T | 180  | chr8:79489750-79489850 |
| chr8 | 79490650 | 79490750 | 1223-Lng-C-T | 81   | chr8:79490650-79490750 |
| chr8 | 79526250 | 79526350 | 846-Lng-A-T  | 67   | chr8:79526250-79526350 |
| chr8 | 79560350 | 79560450 | 1090-Lng-B-T | 361  | chr8:79560350-79560450 |
| chr8 | 79580250 | 79580350 | 1065-Lng-C-T | 64   | chr8:79580250-79580350 |
| chr8 | 79603750 | 79603850 | 1004-Lng-A-T | 83   | chr8:79603750-79603850 |
| chr8 | 79641950 | 79642050 | 1090-Lng-A-T | 62   | chr8:79641950-79642050 |
| chr8 | 79716850 | 79716950 | 1152-Lng-A-T | 31   | chr8:79716850-79716950 |
| chr8 | 79739150 | 79739250 | 901-Lng-B-T  | 418  | chr8:79739150-79739250 |
| chr8 | 79851750 | 79851850 | 1167-Lng-A-T | 59   | chr8:79851750-79851850 |
| chr8 | 79949050 | 79949150 | 1274-Lng-A-T | 85   | chr8:79949050-79949150 |
| chr8 | 80013050 | 80013150 | 1188-Lng-A-T | 127  | chr8:80013050-80013150 |
| chr8 | 80013050 | 80013150 | 901-Lng-B-T  | 80   | chr8:80013050-80013150 |
| chr8 | 80016550 | 80016650 | 1223-Lng-C-T | 79   | chr8:80016550-80016650 |
| chr8 | 80708650 | 80708750 | 1090-Lng-A-T | 70   | chr8:80708650-80708750 |
| chr8 | 80842150 | 80842250 | 1065-Lng-A-T | 42   | chr8:80842150-80842250 |
| chr8 | 81028050 | 81028150 | 1090-Lng-A-T | 453  | chr8:81028050-81028150 |
| chr8 | 81139950 | 81140050 | 901-Lng-C-T  | 44   | chr8:81139950-81140050 |
| chr8 | 81140750 | 81140850 | 901-Lng-A-T  | 73   | chr8:81140750-81140850 |
| chr8 | 81147350 | 81147450 | 1274-Lng-A-T | 69   | chr8:81147350-81147450 |
| chr8 | 81167250 | 81167350 | 1004-Lng-A-T | 78   | chr8:81167250-81167350 |
| chr8 | 81236250 | 81236350 | 1065-Lng-A-T | 88   | chr8:81236250-81236350 |
| chr8 | 81332250 | 81332350 | 1065-Lng-B-T | 77   | chr8:81332250-81332350 |
| chr8 | 81334750 | 81334850 | 1090-Lng-B-T | 96   | chr8:81334750-81334850 |
| chr8 | 81385150 | 81385250 | 1065-Lng-C-T | 84   | chr8:81385150-81385250 |
| chr8 | 81541950 | 81542050 | 1100-Lng-A-T | 196  | chr8:81541950-81542050 |
| chr8 | 81773450 | 81773550 | 846-Lng-A-T  | 156  | chr8:81773450-81773550 |
| chr8 | 81785750 | 81785850 | 1065-Lng-B-T | 46   | chr8:81785750-81785850 |
| chr8 | 81801150 | 81801250 | 1223-Lng-B-T | 53   | chr8:81801150-81801250 |
| chr8 | 81807950 | 81808050 | 1072-Lng-A-T | 51   | chr8:81807950-81808050 |
| chr8 | 82077750 | 82077850 | 1065-Lng-C-T | 1060 | chr8:82077750-82077850 |
| chr8 | 82180250 | 82180350 | 901-Lng-D-T  | 535  | chr8:82180250-82180350 |
| chr8 | 82206050 | 82206150 | 1090-Lng-A-T | 880  | chr8:82206050-82206150 |
| chr8 | 82250550 | 82250650 | 1223-Lng-A-T | 676  | chr8:82250550-82250650 |
| chr8 | 82474450 | 82474550 | 1065-Lng-B-T | 42   | chr8:82474450-82474550 |
| chr8 | 82516650 | 82516750 | 1004-Lng-A-T | 98   | chr8:82516650-82516750 |
| chr8 | 82633750 | 82633850 | 1065-Lng-A-T | 75   | chr8:82633750-82633850 |
| chr8 | 82945750 | 82945850 | 1167-Lng-A-T | 55   | chr8:82945750-82945850 |
| chr8 | 83219750 | 83219850 | 901-Lng-C-T  | 51   | chr8:83219750-83219850 |
| chr8 | 83346950 | 83347050 | 1065-Lng-A-T | 762  | chr8:83346950-83347050 |
| chr8 | 83364550 | 83364650 | 1274-Lng-A-T | 99   | chr8:83364550-83364650 |
| chr8 | 83511950 | 83512050 | 1065-Lng-A-T | 71   | chr8:83511950-83512050 |
| chr8 | 83553150 | 83553250 | 901-Lng-A-T  | 85   | chr8:83553150-83553250 |

**Table S2: SB Insertion regions**

|      |          |          |              |     |                        |
|------|----------|----------|--------------|-----|------------------------|
| chr8 | 83687050 | 83687150 | 1004-Lng-A-T | 76  | chr8:83687050-83687150 |
| chr8 | 83891350 | 83891450 | 901-Lng-C-T  | 35  | chr8:83891350-83891450 |
| chr8 | 84020250 | 84020350 | 901-Lng-A-T  | 105 | chr8:84020250-84020350 |
| chr8 | 84028450 | 84028550 | 1065-Lng-B-T | 42  | chr8:84028450-84028550 |
| chr8 | 84141250 | 84141350 | 1100-Lng-A-T | 127 | chr8:84141250-84141350 |
| chr8 | 84309150 | 84309250 | 1151-Lng-A-T | 266 | chr8:84309150-84309250 |
| chr8 | 84384250 | 84384350 | 1223-Lng-B-T | 37  | chr8:84384250-84384350 |
| chr8 | 84401850 | 84401950 | 1167-Lng-A-T | 46  | chr8:84401850-84401950 |
| chr8 | 84414650 | 84414750 | 1065-Lng-A-T | 49  | chr8:84414650-84414750 |
| chr8 | 84450550 | 84450650 | 1100-Lng-A-T | 57  | chr8:84450550-84450650 |
| chr8 | 84791850 | 84791950 | 1151-Lng-A-T | 68  | chr8:84791850-84791950 |
| chr8 | 84817750 | 84817850 | 1274-Lng-A-T | 223 | chr8:84817750-84817850 |
| chr8 | 84821150 | 84821250 | 1072-Lng-A-T | 68  | chr8:84821150-84821250 |
| chr8 | 84850150 | 84850250 | 1274-Lng-A-T | 72  | chr8:84850150-84850250 |
| chr8 | 84976850 | 84976950 | 1188-Lng-A-T | 49  | chr8:84976850-84976950 |
| chr8 | 85004950 | 85005050 | 1188-Lng-A-T | 42  | chr8:85004950-85005050 |
| chr8 | 85187550 | 85187650 | 1223-Lng-B-T | 46  | chr8:85187550-85187650 |
| chr8 | 85217150 | 85217250 | 1072-Lng-A-T | 60  | chr8:85217150-85217250 |
| chr8 | 85476050 | 85476150 | 1065-Lng-A-T | 67  | chr8:85476050-85476150 |
| chr8 | 85507750 | 85507850 | 1004-Lng-A-T | 63  | chr8:85507750-85507850 |
| chr8 | 85726550 | 85726650 | 1223-Lng-B-T | 44  | chr8:85726550-85726650 |
| chr8 | 85755750 | 85755850 | 901-Lng-B-T  | 39  | chr8:85755750-85755850 |
| chr8 | 86110750 | 86110850 | 1274-Lng-A-T | 91  | chr8:86110750-86110850 |
| chr8 | 86126650 | 86126750 | 1274-Lng-A-T | 171 | chr8:86126650-86126750 |
| chr8 | 86130550 | 86130650 | 901-Lng-B-T  | 54  | chr8:86130550-86130650 |
| chr8 | 86546050 | 86546150 | 901-Lng-B-T  | 242 | chr8:86546050-86546150 |
| chr8 | 86596950 | 86597050 | 1274-Lng-A-T | 54  | chr8:86596950-86597050 |
| chr8 | 86713050 | 86713150 | 1004-Lng-A-T | 85  | chr8:86713050-86713150 |
| chr8 | 86779950 | 86780050 | 1072-Lng-A-T | 130 | chr8:86779950-86780050 |
| chr8 | 87198050 | 87198150 | 1100-Lng-A-T | 64  | chr8:87198050-87198150 |
| chr8 | 87237250 | 87237350 | 1223-Lng-B-T | 71  | chr8:87237250-87237350 |
| chr8 | 87252650 | 87252750 | 1090-Lng-A-T | 66  | chr8:87252650-87252750 |
| chr8 | 87279850 | 87279950 | 1223-Lng-D-T | 103 | chr8:87279850-87279950 |
| chr8 | 87280850 | 87280950 | 1167-Lng-A-T | 92  | chr8:87280850-87280950 |
| chr8 | 87303650 | 87303750 | 1100-Lng-A-T | 51  | chr8:87303650-87303750 |
| chr8 | 87328450 | 87328550 | 1065-Lng-A-T | 84  | chr8:87328450-87328550 |
| chr8 | 87345850 | 87345950 | 1223-Lng-D-T | 58  | chr8:87345850-87345950 |
| chr8 | 87552250 | 87552350 | 901-Lng-D-T  | 146 | chr8:87552250-87552350 |
| chr8 | 87602550 | 87602650 | 1188-Lng-A-T | 40  | chr8:87602550-87602650 |
| chr8 | 87797850 | 87797950 | 1090-Lng-A-T | 55  | chr8:87797850-87797950 |
| chr8 | 87810650 | 87810750 | 1065-Lng-C-T | 131 | chr8:87810650-87810750 |
| chr8 | 87948550 | 87948650 | 1151-Lng-A-T | 73  | chr8:87948550-87948650 |
| chr8 | 88018550 | 88018650 | 901-Lng-B-T  | 178 | chr8:88018550-88018650 |
| chr8 | 88069950 | 88070050 | 1072-Lng-A-T | 97  | chr8:88069950-88070050 |
| chr8 | 88199550 | 88199650 | 901-Lng-B-T  | 274 | chr8:88199550-88199650 |
| chr8 | 88315350 | 88315450 | 901-Lng-A-T  | 98  | chr8:88315350-88315450 |

**Table S2: SB Insertion regions**

|      |          |          |              |      |                        |
|------|----------|----------|--------------|------|------------------------|
| chr8 | 88397650 | 88397750 | 901-Lng-B-T  | 110  | chr8:88397650-88397750 |
| chr8 | 88726550 | 88726650 | 1274-Lng-A-T | 53   | chr8:88726550-88726650 |
| chr8 | 88732950 | 88733050 | 1065-Lng-B-T | 96   | chr8:88732950-88733050 |
| chr8 | 88843150 | 88843250 | 1152-Lng-A-T | 71   | chr8:88843150-88843250 |
| chr8 | 88855850 | 88855950 | 1151-Lng-A-T | 62   | chr8:88855850-88855950 |
| chr8 | 89156750 | 89156850 | 1065-Lng-B-T | 53   | chr8:89156750-89156850 |
| chr8 | 89191150 | 89191250 | 1223-Lng-C-T | 54   | chr8:89191150-89191250 |
| chr8 | 89228850 | 89228950 | 1100-Lng-A-T | 98   | chr8:89228850-89228950 |
| chr8 | 89232150 | 89232250 | 1065-Lng-B-T | 47   | chr8:89232150-89232250 |
| chr8 | 89266550 | 89266650 | 1065-Lng-A-T | 81   | chr8:89266550-89266650 |
| chr8 | 89314250 | 89314350 | 1072-Lng-A-T | 81   | chr8:89314250-89314350 |
| chr8 | 89389450 | 89389550 | 1100-Lng-A-T | 67   | chr8:89389450-89389550 |
| chr8 | 90120150 | 90120250 | 1151-Lng-A-T | 55   | chr8:90120150-90120250 |
| chr8 | 90242450 | 90242550 | 1152-Lng-A-T | 53   | chr8:90242450-90242550 |
| chr8 | 90437850 | 90437950 | 1090-Lng-B-T | 93   | chr8:90437850-90437950 |
| chr8 | 90729650 | 90729750 | 1072-Lng-A-T | 52   | chr8:90729650-90729750 |
| chr8 | 90730650 | 90730750 | 1090-Lng-A-T | 92   | chr8:90730650-90730750 |
| chr8 | 90733550 | 90733650 | 901-Lng-C-T  | 57   | chr8:90733550-90733650 |
| chr8 | 90806150 | 90806250 | 901-Lng-B-T  | 113  | chr8:90806150-90806250 |
| chr8 | 90814250 | 90814350 | 1065-Lng-B-T | 4341 | chr8:90814250-90814350 |
| chr8 | 90828850 | 90828950 | 1223-Lng-C-T | 53   | chr8:90828850-90828950 |
| chr8 | 90953550 | 90953650 | 1274-Lng-A-T | 57   | chr8:90953550-90953650 |
| chr8 | 91032950 | 91033050 | 1167-Lng-A-T | 70   | chr8:91032950-91033050 |
| chr8 | 91137750 | 91137850 | 901-Lng-D-T  | 37   | chr8:91137750-91137850 |
| chr8 | 91229550 | 91229650 | 1151-Lng-A-T | 69   | chr8:91229550-91229650 |
| chr8 | 91230350 | 91230450 | 1188-Lng-A-T | 96   | chr8:91230350-91230450 |
| chr8 | 91419850 | 91419950 | 1223-Lng-A-T | 80   | chr8:91419850-91419950 |
| chr8 | 91506250 | 91506350 | 1004-Lng-A-T | 77   | chr8:91506250-91506350 |
| chr8 | 91868250 | 91868350 | 1004-Lng-A-T | 69   | chr8:91868250-91868350 |
| chr8 | 92057150 | 92057250 | 846-Lng-A-T  | 221  | chr8:92057150-92057250 |
| chr8 | 92465550 | 92465650 | 901-Lng-A-T  | 105  | chr8:92465550-92465650 |
| chr8 | 92637450 | 92637550 | 1223-Lng-C-T | 210  | chr8:92637450-92637550 |
| chr8 | 92672750 | 92672850 | 1065-Lng-C-T | 103  | chr8:92672750-92672850 |
| chr8 | 92852150 | 92852250 | 1188-Lng-A-T | 162  | chr8:92852150-92852250 |
| chr8 | 92857250 | 92857350 | 1072-Lng-A-T | 197  | chr8:92857250-92857350 |
| chr8 | 92889750 | 92889850 | 901-Lng-A-T  | 106  | chr8:92889750-92889850 |
| chr8 | 92923450 | 92923550 | 901-Lng-A-T  | 78   | chr8:92923450-92923550 |
| chr8 | 93181150 | 93181250 | 901-Lng-C-T  | 28   | chr8:93181150-93181250 |
| chr8 | 93423250 | 93423350 | 1188-Lng-A-T | 45   | chr8:93423250-93423350 |
| chr8 | 93466850 | 93466950 | 1223-Lng-D-T | 76   | chr8:93466850-93466950 |
| chr8 | 93497150 | 93497250 | 1151-Lng-A-T | 60   | chr8:93497150-93497250 |
| chr8 | 93508450 | 93508550 | 1274-Lng-A-T | 51   | chr8:93508450-93508550 |
| chr8 | 93541850 | 93541950 | 1223-Lng-C-T | 43   | chr8:93541850-93541950 |
| chr8 | 93926550 | 93926650 | 1223-Lng-B-T | 46   | chr8:93926550-93926650 |
| chr8 | 93987850 | 93987950 | 1090-Lng-A-T | 65   | chr8:93987850-93987950 |
| chr8 | 93989850 | 93989950 | 1004-Lng-A-T | 58   | chr8:93989850-93989950 |

**Table S2: SB Insertion regions**

|      |          |          |              |      |                        |
|------|----------|----------|--------------|------|------------------------|
| chr8 | 94049050 | 94049150 | 1100-Lng-A-T | 102  | chr8:94049050-94049150 |
| chr8 | 94065550 | 94065650 | 1004-Lng-A-T | 61   | chr8:94065550-94065650 |
| chr8 | 94536450 | 94536550 | 1065-Lng-B-T | 64   | chr8:94536450-94536550 |
| chr8 | 94563050 | 94563150 | 1188-Lng-A-T | 34   | chr8:94563050-94563150 |
| chr8 | 94789350 | 94789450 | 1151-Lng-A-T | 153  | chr8:94789350-94789450 |
| chr8 | 95048950 | 95049050 | 1167-Lng-A-T | 61   | chr8:95048950-95049050 |
| chr8 | 95052950 | 95053050 | 1004-Lng-A-T | 119  | chr8:95052950-95053050 |
| chr8 | 95411350 | 95411450 | 1151-Lng-A-T | 185  | chr8:95411350-95411450 |
| chr8 | 95684150 | 95684250 | 901-Lng-D-T  | 115  | chr8:95684150-95684250 |
| chr8 | 95694350 | 95694450 | 901-Lng-A-T  | 430  | chr8:95694350-95694450 |
| chr8 | 95712750 | 95712850 | 1274-Lng-A-T | 50   | chr8:95712750-95712850 |
| chr8 | 95717150 | 95717250 | 1151-Lng-A-T | 124  | chr8:95717150-95717250 |
| chr8 | 95740450 | 95740550 | 1090-Lng-A-T | 58   | chr8:95740450-95740550 |
| chr8 | 95857450 | 95857550 | 1223-Lng-B-T | 36   | chr8:95857450-95857550 |
| chr8 | 95944650 | 95944750 | 1090-Lng-B-T | 370  | chr8:95944650-95944750 |
| chr8 | 96205350 | 96205450 | 901-Lng-B-T  | 106  | chr8:96205350-96205450 |
| chr8 | 96376150 | 96376250 | 901-Lng-B-T  | 62   | chr8:96376150-96376250 |
| chr8 | 96503650 | 96503750 | 1152-Lng-A-T | 67   | chr8:96503650-96503750 |
| chr8 | 96779050 | 96779150 | 1004-Lng-A-T | 166  | chr8:96779050-96779150 |
| chr8 | 96833350 | 96833450 | 1100-Lng-A-T | 52   | chr8:96833350-96833450 |
| chr8 | 97037350 | 97037450 | 1004-Lng-A-T | 61   | chr8:97037350-97037450 |
| chr8 | 97167150 | 97167250 | 1065-Lng-C-T | 3254 | chr8:97167150-97167250 |
| chr8 | 97195550 | 97195650 | 1100-Lng-A-T | 79   | chr8:97195550-97195650 |
| chr8 | 97342950 | 97343050 | 1274-Lng-A-T | 162  | chr8:97342950-97343050 |
| chr8 | 97542750 | 97542850 | 1274-Lng-A-T | 72   | chr8:97542750-97542850 |
| chr8 | 97551650 | 97551750 | 1100-Lng-A-T | 111  | chr8:97551650-97551750 |
| chr8 | 97574750 | 97574850 | 1090-Lng-A-T | 65   | chr8:97574750-97574850 |
| chr8 | 97677750 | 97677850 | 1151-Lng-A-T | 123  | chr8:97677750-97677850 |
| chr8 | 97847450 | 97847550 | 1151-Lng-A-T | 63   | chr8:97847450-97847550 |
| chr8 | 97857150 | 97857250 | 901-Lng-D-T  | 77   | chr8:97857150-97857250 |
| chr8 | 97882750 | 97882850 | 1167-Lng-A-T | 47   | chr8:97882750-97882850 |
| chr8 | 97991350 | 97991450 | 901-Lng-B-T  | 39   | chr8:97991350-97991450 |
| chr8 | 97997850 | 97997950 | 1065-Lng-B-T | 52   | chr8:97997850-97997950 |
| chr8 | 98006650 | 98006750 | 1274-Lng-A-T | 49   | chr8:98006650-98006750 |
| chr8 | 98009350 | 98009450 | 1152-Lng-A-T | 146  | chr8:98009350-98009450 |
| chr8 | 98196050 | 98196150 | 1274-Lng-A-T | 175  | chr8:98196050-98196150 |
| chr8 | 98241450 | 98241550 | 1065-Lng-A-T | 112  | chr8:98241450-98241550 |
| chr8 | 98263450 | 98263550 | 1274-Lng-A-T | 53   | chr8:98263450-98263550 |
| chr8 | 98285550 | 98285650 | 1152-Lng-A-T | 91   | chr8:98285550-98285650 |
| chr8 | 98288250 | 98288350 | 901-Lng-D-T  | 214  | chr8:98288250-98288350 |
| chr8 | 98307850 | 98307950 | 1223-Lng-B-T | 185  | chr8:98307850-98307950 |
| chr8 | 98310850 | 98310950 | 1065-Lng-B-T | 76   | chr8:98310850-98310950 |
| chr8 | 98324350 | 98324450 | 1090-Lng-A-T | 73   | chr8:98324350-98324450 |
| chr8 | 98327950 | 98328050 | 846-Lng-A-T  | 74   | chr8:98327950-98328050 |
| chr8 | 98434950 | 98435050 | 1151-Lng-A-T | 221  | chr8:98434950-98435050 |
| chr8 | 98473550 | 98473650 | 1065-Lng-A-T | 85   | chr8:98473550-98473650 |

**Table S2: SB Insertion regions**

|      |           |           |              |      |                          |
|------|-----------|-----------|--------------|------|--------------------------|
| chr8 | 98749050  | 98749150  | 1065-Lng-A-T | 34   | chr8:98749050-98749150   |
| chr8 | 98763350  | 98763450  | 1065-Lng-A-T | 247  | chr8:98763350-98763450   |
| chr8 | 98837750  | 98837850  | 1152-Lng-A-T | 40   | chr8:98837750-98837850   |
| chr8 | 98892850  | 98892950  | 1004-Lng-A-T | 140  | chr8:98892850-98892950   |
| chr8 | 98938650  | 98938750  | 1188-Lng-A-T | 35   | chr8:98938650-98938750   |
| chr8 | 99106350  | 99106450  | 1090-Lng-A-T | 53   | chr8:99106350-99106450   |
| chr8 | 99308650  | 99308750  | 1152-Lng-A-T | 148  | chr8:99308650-99308750   |
| chr8 | 99336650  | 99336750  | 846-Lng-A-T  | 180  | chr8:99336650-99336750   |
| chr8 | 99451750  | 99451850  | 1152-Lng-A-T | 209  | chr8:99451750-99451850   |
| chr8 | 99551550  | 99551650  | 1223-Lng-A-T | 121  | chr8:99551550-99551650   |
| chr8 | 99598750  | 99598850  | 1223-Lng-B-T | 242  | chr8:99598750-99598850   |
| chr8 | 99782250  | 99782350  | 901-Lng-B-T  | 145  | chr8:99782250-99782350   |
| chr8 | 99906750  | 99906850  | 1223-Lng-A-T | 182  | chr8:99906750-99906850   |
| chr8 | 100008650 | 100008750 | 1223-Lng-C-T | 51   | chr8:100008650-100008750 |
| chr8 | 100049950 | 100050050 | 1223-Lng-D-T | 46   | chr8:100049950-100050050 |
| chr8 | 100133450 | 100133550 | 1072-Lng-A-T | 66   | chr8:100133450-100133550 |
| chr8 | 100293850 | 100293950 | 1223-Lng-B-T | 277  | chr8:100293850-100293950 |
| chr8 | 100365950 | 100366050 | 1188-Lng-A-T | 197  | chr8:100365950-100366050 |
| chr8 | 100466450 | 100466550 | 1188-Lng-A-T | 124  | chr8:100466450-100466550 |
| chr8 | 100547450 | 100547550 | 1152-Lng-A-T | 55   | chr8:100547450-100547550 |
| chr8 | 100627150 | 100627250 | 1065-Lng-A-T | 44   | chr8:100627150-100627250 |
| chr8 | 100655550 | 100655650 | 1004-Lng-A-T | 108  | chr8:100655550-100655650 |
| chr8 | 100834550 | 100834650 | 1274-Lng-A-T | 125  | chr8:100834550-100834650 |
| chr8 | 101112350 | 101112450 | 901-Lng-C-T  | 81   | chr8:101112350-101112450 |
| chr8 | 101115150 | 101115250 | 901-Lng-B-T  | 160  | chr8:101115150-101115250 |
| chr8 | 101117550 | 101117650 | 1223-Lng-D-T | 53   | chr8:101117550-101117650 |
| chr8 | 101201950 | 101202050 | 1065-Lng-A-T | 75   | chr8:101201950-101202050 |
| chr8 | 101210450 | 101210550 | 846-Lng-A-T  | 1437 | chr8:101210450-101210550 |
| chr8 | 101273050 | 101273150 | 1223-Lng-A-T | 202  | chr8:101273050-101273150 |
| chr8 | 101387550 | 101387650 | 1072-Lng-A-T | 49   | chr8:101387550-101387650 |
| chr8 | 101520750 | 101520850 | 1100-Lng-B-T | 62   | chr8:101520750-101520850 |
| chr8 | 101606150 | 101606250 | 1004-Lng-A-T | 77   | chr8:101606150-101606250 |
| chr8 | 101611950 | 101612050 | 1188-Lng-A-T | 271  | chr8:101611950-101612050 |
| chr8 | 101767250 | 101767350 | 1223-Lng-A-T | 148  | chr8:101767250-101767350 |
| chr8 | 101788050 | 101788150 | 1223-Lng-C-T | 55   | chr8:101788050-101788150 |
| chr8 | 101976550 | 101976650 | 1100-Lng-A-T | 116  | chr8:101976550-101976650 |
| chr8 | 102174450 | 102174550 | 1152-Lng-A-T | 116  | chr8:102174450-102174550 |
| chr8 | 102215050 | 102215150 | 1065-Lng-A-T | 590  | chr8:102215050-102215150 |
| chr8 | 102363850 | 102363950 | 901-Lng-B-T  | 208  | chr8:102363850-102363950 |
| chr8 | 102380750 | 102380850 | 1100-Lng-A-T | 94   | chr8:102380750-102380850 |
| chr8 | 102568750 | 102568850 | 1065-Lng-A-T | 61   | chr8:102568750-102568850 |
| chr8 | 102717650 | 102717750 | 1065-Lng-B-T | 86   | chr8:102717650-102717750 |
| chr8 | 102718550 | 102718650 | 846-Lng-A-T  | 102  | chr8:102718550-102718650 |
| chr8 | 102742750 | 102742850 | 1004-Lng-A-T | 104  | chr8:102742750-102742850 |
| chr8 | 102805950 | 102806050 | 1152-Lng-A-T | 424  | chr8:102805950-102806050 |
| chr8 | 102821850 | 102821950 | 1072-Lng-A-T | 118  | chr8:102821850-102821950 |

**Table S2: SB Insertion regions**

|      |           |           |              |     |                          |
|------|-----------|-----------|--------------|-----|--------------------------|
| chr8 | 102855650 | 102855750 | 1152-Lng-A-T | 161 | chr8:102855650-102855750 |
| chr8 | 102897550 | 102897650 | 1188-Lng-A-T | 48  | chr8:102897550-102897650 |
| chr8 | 103001650 | 103001750 | 901-Lng-A-T  | 64  | chr8:103001650-103001750 |
| chr8 | 103034950 | 103035050 | 1090-Lng-A-T | 776 | chr8:103034950-103035050 |
| chr8 | 103083750 | 103083850 | 1090-Lng-A-T | 120 | chr8:103083750-103083850 |
| chr8 | 103121950 | 103122050 | 901-Lng-B-T  | 97  | chr8:103121950-103122050 |
| chr8 | 103222750 | 103222850 | 1065-Lng-B-T | 69  | chr8:103222750-103222850 |
| chr8 | 103655950 | 103656050 | 1072-Lng-A-T | 69  | chr8:103655950-103656050 |
| chr8 | 103747250 | 103747350 | 901-Lng-D-T  | 52  | chr8:103747250-103747350 |
| chr8 | 104024950 | 104025050 | 901-Lng-C-T  | 41  | chr8:104024950-104025050 |
| chr8 | 104053350 | 104053450 | 901-Lng-B-T  | 63  | chr8:104053350-104053450 |
| chr8 | 104053850 | 104053950 | 1188-Lng-A-T | 248 | chr8:104053850-104053950 |
| chr8 | 104148750 | 104148850 | 1004-Lng-A-T | 108 | chr8:104148750-104148850 |
| chr8 | 104187050 | 104187150 | 901-Lng-B-T  | 203 | chr8:104187050-104187150 |
| chr8 | 104333350 | 104333450 | 1065-Lng-C-T | 64  | chr8:104333350-104333450 |
| chr8 | 104385550 | 104385650 | 901-Lng-C-T  | 65  | chr8:104385550-104385650 |
| chr8 | 104525150 | 104525250 | 1090-Lng-A-T | 83  | chr8:104525150-104525250 |
| chr8 | 104567950 | 104568050 | 1152-Lng-A-T | 187 | chr8:104567950-104568050 |
| chr8 | 104754850 | 104754950 | 901-Lng-C-T  | 59  | chr8:104754850-104754950 |
| chr8 | 104933750 | 104933850 | 901-Lng-C-T  | 122 | chr8:104933750-104933850 |
| chr8 | 105002450 | 105002550 | 1072-Lng-A-T | 64  | chr8:105002450-105002550 |
| chr8 | 105037550 | 105037650 | 846-Lng-A-T  | 51  | chr8:105037550-105037650 |
| chr8 | 105072450 | 105072550 | 1065-Lng-B-T | 46  | chr8:105072450-105072550 |
| chr8 | 105226350 | 105226450 | 1065-Lng-C-T | 69  | chr8:105226350-105226450 |
| chr8 | 105566150 | 105566250 | 1065-Lng-C-T | 73  | chr8:105566150-105566250 |
| chr8 | 106066750 | 106066850 | 1065-Lng-B-T | 61  | chr8:106066750-106066850 |
| chr8 | 106217650 | 106217750 | 1090-Lng-A-T | 133 | chr8:106217650-106217750 |
| chr8 | 106519350 | 106519450 | 1065-Lng-A-T | 114 | chr8:106519350-106519450 |
| chr8 | 106868450 | 106868550 | 1151-Lng-A-T | 352 | chr8:106868450-106868550 |
| chr8 | 106874550 | 106874650 | 901-Lng-A-T  | 512 | chr8:106874550-106874650 |
| chr8 | 107057450 | 107057550 | 901-Lng-C-T  | 75  | chr8:107057450-107057550 |
| chr8 | 107091050 | 107091150 | 901-Lng-A-T  | 349 | chr8:107091050-107091150 |
| chr8 | 107132950 | 107133050 | 1223-Lng-B-T | 171 | chr8:107132950-107133050 |
| chr8 | 107538850 | 107538950 | 1100-Lng-A-T | 61  | chr8:107538850-107538950 |
| chr8 | 107698450 | 107698550 | 901-Lng-D-T  | 113 | chr8:107698450-107698550 |
| chr8 | 107739650 | 107739750 | 1090-Lng-A-T | 61  | chr8:107739650-107739750 |
| chr8 | 107751150 | 107751250 | 1065-Lng-C-T | 143 | chr8:107751150-107751250 |
| chr8 | 107761450 | 107761550 | 1100-Lng-A-T | 69  | chr8:107761450-107761550 |
| chr8 | 107764950 | 107765050 | 1188-Lng-A-T | 45  | chr8:107764950-107765050 |
| chr8 | 107771050 | 107771150 | 1223-Lng-B-T | 34  | chr8:107771050-107771150 |
| chr8 | 107847250 | 107847350 | 1100-Lng-A-T | 205 | chr8:107847250-107847350 |
| chr8 | 107894550 | 107894650 | 846-Lng-A-T  | 52  | chr8:107894550-107894650 |
| chr8 | 108017350 | 108017450 | 1072-Lng-A-T | 52  | chr8:108017350-108017450 |
| chr8 | 108052650 | 108052750 | 1065-Lng-A-T | 99  | chr8:108052650-108052750 |
| chr8 | 108066150 | 108066250 | 1090-Lng-A-T | 86  | chr8:108066150-108066250 |
| chr8 | 108085950 | 108086050 | 901-Lng-D-T  | 237 | chr8:108085950-108086050 |

**Table S2: SB Insertion regions**

|      |           |           |              |      |                          |
|------|-----------|-----------|--------------|------|--------------------------|
| chr8 | 108099750 | 108099850 | 1223-Lng-A-T | 201  | chr8:108099750-108099850 |
| chr8 | 108175550 | 108175650 | 1167-Lng-A-T | 66   | chr8:108175550-108175650 |
| chr8 | 108202150 | 108202250 | 1223-Lng-A-T | 598  | chr8:108202150-108202250 |
| chr8 | 108202150 | 108202250 | 1152-Lng-A-T | 93   | chr8:108202150-108202250 |
| chr8 | 108267950 | 108268050 | 901-Lng-B-T  | 761  | chr8:108267950-108268050 |
| chr8 | 108329050 | 108329150 | 846-Lng-A-T  | 72   | chr8:108329050-108329150 |
| chr8 | 108335650 | 108335750 | 1167-Lng-A-T | 50   | chr8:108335650-108335750 |
| chr8 | 108347150 | 108347250 | 901-Lng-D-T  | 354  | chr8:108347150-108347250 |
| chr8 | 108360450 | 108360550 | 1151-Lng-A-T | 288  | chr8:108360450-108360550 |
| chr8 | 108731150 | 108731250 | 1100-Lng-A-T | 81   | chr8:108731150-108731250 |
| chr8 | 109104350 | 109104450 | 1188-Lng-A-T | 227  | chr8:109104350-109104450 |
| chr8 | 109138950 | 109139050 | 901-Lng-D-T  | 544  | chr8:109138950-109139050 |
| chr8 | 109140050 | 109140150 | 1223-Lng-D-T | 41   | chr8:109140050-109140150 |
| chr8 | 109178150 | 109178250 | 901-Lng-B-T  | 187  | chr8:109178150-109178250 |
| chr8 | 109438450 | 109438550 | 1188-Lng-A-T | 46   | chr8:109438450-109438550 |
| chr8 | 109486550 | 109486650 | 1274-Lng-A-T | 97   | chr8:109486550-109486650 |
| chr8 | 109570250 | 109570350 | 1100-Lng-A-T | 100  | chr8:109570250-109570350 |
| chr8 | 109579150 | 109579250 | 1065-Lng-C-T | 75   | chr8:109579150-109579250 |
| chr8 | 109665450 | 109665550 | 901-Lng-C-T  | 118  | chr8:109665450-109665550 |
| chr8 | 109709850 | 109709950 | 1223-Lng-D-T | 75   | chr8:109709850-109709950 |
| chr8 | 109810750 | 109810850 | 1065-Lng-A-T | 69   | chr8:109810750-109810850 |
| chr8 | 109873350 | 109873450 | 846-Lng-A-T  | 44   | chr8:109873350-109873450 |
| chr8 | 109905450 | 109905550 | 1100-Lng-B-T | 102  | chr8:109905450-109905550 |
| chr8 | 109983750 | 109983850 | 1274-Lng-A-T | 1015 | chr8:109983750-109983850 |
| chr8 | 110498650 | 110498750 | 1065-Lng-B-T | 73   | chr8:110498650-110498750 |
| chr8 | 110607450 | 110607550 | 1167-Lng-A-T | 63   | chr8:110607450-110607550 |
| chr8 | 110747150 | 110747250 | 1100-Lng-A-T | 135  | chr8:110747150-110747250 |
| chr8 | 110791950 | 110792050 | 1151-Lng-A-T | 56   | chr8:110791950-110792050 |
| chr8 | 111232750 | 111232850 | 1188-Lng-A-T | 41   | chr8:111232750-111232850 |
| chr8 | 111292450 | 111292550 | 1072-Lng-A-T | 65   | chr8:111292450-111292550 |
| chr8 | 111293750 | 111293850 | 1065-Lng-A-T | 67   | chr8:111293750-111293850 |
| chr8 | 111320950 | 111321050 | 1188-Lng-A-T | 63   | chr8:111320950-111321050 |
| chr8 | 111325050 | 111325150 | 901-Lng-A-T  | 94   | chr8:111325050-111325150 |
| chr8 | 111351150 | 111351250 | 1004-Lng-A-T | 154  | chr8:111351150-111351250 |
| chr8 | 111380050 | 111380150 | 1188-Lng-A-T | 45   | chr8:111380050-111380150 |
| chr8 | 111413150 | 111413250 | 1152-Lng-A-T | 127  | chr8:111413150-111413250 |
| chr8 | 111722950 | 111723050 | 901-Lng-B-T  | 204  | chr8:111722950-111723050 |
| chr8 | 111726950 | 111727050 | 1152-Lng-A-T | 90   | chr8:111726950-111727050 |
| chr8 | 111863650 | 111863750 | 1072-Lng-A-T | 68   | chr8:111863650-111863750 |
| chr8 | 111975850 | 111975950 | 1004-Lng-A-T | 56   | chr8:111975850-111975950 |
| chr8 | 111994150 | 111994250 | 1072-Lng-A-T | 85   | chr8:111994150-111994250 |
| chr8 | 112122150 | 112122250 | 1167-Lng-A-T | 51   | chr8:112122150-112122250 |
| chr8 | 112174450 | 112174550 | 1090-Lng-A-T | 166  | chr8:112174450-112174550 |
| chr8 | 112316250 | 112316350 | 1100-Lng-A-T | 62   | chr8:112316250-112316350 |
| chr8 | 112355650 | 112355750 | 1065-Lng-C-T | 1026 | chr8:112355650-112355750 |
| chr8 | 112360250 | 112360350 | 1065-Lng-A-T | 102  | chr8:112360250-112360350 |



**Table S2: SB Insertion regions**

|      |           |           |              |     |                          |
|------|-----------|-----------|--------------|-----|--------------------------|
| chr8 | 112366950 | 112367050 | 1065-Lng-A-T | 58  | chr8:112366950-112367050 |
| chr8 | 112381450 | 112381550 | 1188-Lng-A-T | 335 | chr8:112381450-112381550 |
| chr8 | 112432350 | 112432450 | 1072-Lng-A-T | 141 | chr8:112432350-112432450 |
| chr8 | 112475150 | 112475250 | 1004-Lng-A-T | 106 | chr8:112475150-112475250 |
| chr8 | 112490750 | 112490850 | 901-Lng-B-T  | 122 | chr8:112490750-112490850 |
| chr8 | 112530150 | 112530250 | 901-Lng-C-T  | 34  | chr8:112530150-112530250 |
| chr8 | 112748250 | 112748350 | 901-Lng-B-T  | 38  | chr8:112748250-112748350 |
| chr8 | 112767750 | 112767850 | 901-Lng-C-T  | 51  | chr8:112767750-112767850 |
| chr8 | 112876950 | 112877050 | 1072-Lng-A-T | 56  | chr8:112876950-112877050 |
| chr8 | 112878350 | 112878450 | 1065-Lng-A-T | 114 | chr8:112878350-112878450 |
| chr8 | 113082250 | 113082350 | 901-Lng-B-T  | 112 | chr8:113082250-113082350 |
| chr8 | 113166750 | 113166850 | 1223-Lng-C-T | 46  | chr8:113166750-113166850 |
| chr8 | 113204350 | 113204450 | 1004-Lng-A-T | 69  | chr8:113204350-113204450 |
| chr8 | 113346950 | 113347050 | 1100-Lng-A-T | 117 | chr8:113346950-113347050 |
| chr8 | 113351850 | 113351950 | 901-Lng-C-T  | 84  | chr8:113351850-113351950 |
| chr8 | 113361150 | 113361250 | 1223-Lng-A-T | 102 | chr8:113361150-113361250 |
| chr8 | 113364150 | 113364250 | 1274-Lng-A-T | 67  | chr8:113364150-113364250 |
| chr8 | 113384650 | 113384750 | 1223-Lng-A-T | 56  | chr8:113384650-113384750 |
| chr8 | 113467550 | 113467650 | 1004-Lng-A-T | 93  | chr8:113467550-113467650 |
| chr8 | 113633250 | 113633350 | 901-Lng-A-T  | 75  | chr8:113633250-113633350 |
| chr8 | 113663250 | 113663350 | 1152-Lng-A-T | 66  | chr8:113663250-113663350 |
| chr8 | 113674450 | 113674550 | 1167-Lng-A-T | 134 | chr8:113674450-113674550 |
| chr8 | 113705550 | 113705650 | 1274-Lng-A-T | 89  | chr8:113705550-113705650 |
| chr8 | 113715150 | 113715250 | 901-Lng-B-T  | 286 | chr8:113715150-113715250 |
| chr8 | 113776750 | 113776850 | 1188-Lng-A-T | 79  | chr8:113776750-113776850 |
| chr8 | 113809550 | 113809650 | 1223-Lng-B-T | 95  | chr8:113809550-113809650 |
| chr8 | 113825850 | 113825950 | 1065-Lng-B-T | 53  | chr8:113825850-113825950 |
| chr8 | 113968550 | 113968650 | 901-Lng-C-T  | 88  | chr8:113968550-113968650 |
| chr8 | 114260950 | 114261050 | 1072-Lng-A-T | 147 | chr8:114260950-114261050 |
| chr8 | 114316550 | 114316650 | 901-Lng-A-T  | 302 | chr8:114316550-114316650 |
| chr8 | 114354550 | 114354650 | 1223-Lng-B-T | 39  | chr8:114354550-114354650 |
| chr8 | 114431750 | 114431850 | 1100-Lng-B-T | 51  | chr8:114431750-114431850 |
| chr8 | 114498950 | 114499050 | 901-Lng-D-T  | 148 | chr8:114498950-114499050 |
| chr8 | 114807650 | 114807750 | 1065-Lng-B-T | 49  | chr8:114807650-114807750 |
| chr8 | 114841150 | 114841250 | 846-Lng-A-T  | 96  | chr8:114841150-114841250 |
| chr8 | 114926250 | 114926350 | 1072-Lng-A-T | 150 | chr8:114926250-114926350 |
| chr8 | 115228550 | 115228650 | 1151-Lng-A-T | 63  | chr8:115228550-115228650 |
| chr8 | 115694350 | 115694450 | 846-Lng-A-T  | 52  | chr8:115694350-115694450 |
| chr8 | 115739850 | 115739950 | 1223-Lng-C-T | 46  | chr8:115739850-115739950 |
| chr8 | 116148250 | 116148350 | 1065-Lng-B-T | 51  | chr8:116148250-116148350 |
| chr8 | 116433850 | 116433950 | 1223-Lng-D-T | 43  | chr8:116433850-116433950 |
| chr8 | 117101650 | 117101750 | 1167-Lng-A-T | 108 | chr8:117101650-117101750 |
| chr8 | 117138050 | 117138150 | 1065-Lng-A-T | 42  | chr8:117138050-117138150 |
| chr8 | 117157150 | 117157250 | 1090-Lng-B-T | 390 | chr8:117157150-117157250 |
| chr8 | 117308050 | 117308150 | 846-Lng-A-T  | 138 | chr8:117308050-117308150 |
| chr8 | 117446450 | 117446550 | 1100-Lng-A-T | 128 | chr8:117446450-117446550 |

**Table S2: SB Insertion regions**

|      |           |           |              |     |                          |
|------|-----------|-----------|--------------|-----|--------------------------|
| chr8 | 117522650 | 117522750 | 1004-Lng-A-T | 568 | chr8:117522650-117522750 |
| chr8 | 117665650 | 117665750 | 1065-Lng-C-T | 102 | chr8:117665650-117665750 |
| chr8 | 117693850 | 117693950 | 1151-Lng-A-T | 315 | chr8:117693850-117693950 |
| chr8 | 117929850 | 117929950 | 1090-Lng-B-T | 343 | chr8:117929850-117929950 |
| chr8 | 117991250 | 117991350 | 1004-Lng-A-T | 50  | chr8:117991250-117991350 |
| chr8 | 118143850 | 118143950 | 1152-Lng-A-T | 113 | chr8:118143850-118143950 |
| chr8 | 119078150 | 119078250 | 901-Lng-B-T  | 64  | chr8:119078150-119078250 |
| chr8 | 119110850 | 119110950 | 1100-Lng-A-T | 103 | chr8:119110850-119110950 |
| chr8 | 119132250 | 119132350 | 1223-Lng-A-T | 67  | chr8:119132250-119132350 |
| chr8 | 119160750 | 119160850 | 1100-Lng-A-T | 118 | chr8:119160750-119160850 |
| chr8 | 119181050 | 119181150 | 1004-Lng-A-T | 797 | chr8:119181050-119181150 |
| chr8 | 119516550 | 119516650 | 901-Lng-D-T  | 92  | chr8:119516550-119516650 |
| chr8 | 119682850 | 119682950 | 1065-Lng-B-T | 94  | chr8:119682850-119682950 |
| chr8 | 119701050 | 119701150 | 901-Lng-B-T  | 170 | chr8:119701050-119701150 |
| chr8 | 119822550 | 119822650 | 1151-Lng-A-T | 467 | chr8:119822550-119822650 |
| chr8 | 119875050 | 119875150 | 901-Lng-C-T  | 59  | chr8:119875050-119875150 |
| chr8 | 119961250 | 119961350 | 901-Lng-A-T  | 55  | chr8:119961250-119961350 |
| chr8 | 119974650 | 119974750 | 1152-Lng-A-T | 56  | chr8:119974650-119974750 |
| chr8 | 119982150 | 119982250 | 1274-Lng-A-T | 60  | chr8:119982150-119982250 |
| chr8 | 120026150 | 120026250 | 1188-Lng-A-T | 190 | chr8:120026150-120026250 |
| chr8 | 120042350 | 120042450 | 1065-Lng-B-T | 58  | chr8:120042350-120042450 |
| chr8 | 120323950 | 120324050 | 1274-Lng-A-T | 258 | chr8:120323950-120324050 |
| chr8 | 120366550 | 120366650 | 1065-Lng-B-T | 51  | chr8:120366550-120366650 |
| chr8 | 120385650 | 120385750 | 1188-Lng-A-T | 105 | chr8:120385650-120385750 |
| chr8 | 120600350 | 120600450 | 846-Lng-A-T  | 65  | chr8:120600350-120600450 |
| chr8 | 120749950 | 120750050 | 901-Lng-C-T  | 37  | chr8:120749950-120750050 |
| chr8 | 120881150 | 120881250 | 1167-Lng-A-T | 105 | chr8:120881150-120881250 |
| chr8 | 120896150 | 120896250 | 901-Lng-A-T  | 133 | chr8:120896150-120896250 |
| chr8 | 121056350 | 121056450 | 1152-Lng-A-T | 684 | chr8:121056350-121056450 |
| chr8 | 121064950 | 121065050 | 1223-Lng-B-T | 162 | chr8:121064950-121065050 |
| chr8 | 121295850 | 121295950 | 901-Lng-C-T  | 39  | chr8:121295850-121295950 |
| chr8 | 121750850 | 121750950 | 1100-Lng-B-T | 52  | chr8:121750850-121750950 |
| chr8 | 121912950 | 121913050 | 901-Lng-D-T  | 253 | chr8:121912950-121913050 |
| chr8 | 121950350 | 121950450 | 1072-Lng-A-T | 227 | chr8:121950350-121950450 |
| chr8 | 122039250 | 122039350 | 1152-Lng-A-T | 73  | chr8:122039250-122039350 |
| chr8 | 122066450 | 122066550 | 1004-Lng-A-T | 60  | chr8:122066450-122066550 |
| chr8 | 122114750 | 122114850 | 1072-Lng-A-T | 182 | chr8:122114750-122114850 |
| chr8 | 122245350 | 122245450 | 1072-Lng-A-T | 66  | chr8:122245350-122245450 |
| chr8 | 122464050 | 122464150 | 1188-Lng-A-T | 45  | chr8:122464050-122464150 |
| chr8 | 122759050 | 122759150 | 1274-Lng-A-T | 112 | chr8:122759050-122759150 |
| chr8 | 122951450 | 122951550 | 1065-Lng-A-T | 65  | chr8:122951450-122951550 |
| chr8 | 122976250 | 122976350 | 1065-Lng-B-T | 75  | chr8:122976250-122976350 |
| chr8 | 123127550 | 123127650 | 1072-Lng-A-T | 84  | chr8:123127550-123127650 |
| chr8 | 123942050 | 123942150 | 1072-Lng-A-T | 49  | chr8:123942050-123942150 |
| chr8 | 124148750 | 124148850 | 901-Lng-A-T  | 105 | chr8:124148750-124148850 |
| chr8 | 124452750 | 124452850 | 1151-Lng-A-T | 332 | chr8:124452750-124452850 |

**Table S2: SB Insertion regions**

|      |           |           |              |     |                          |
|------|-----------|-----------|--------------|-----|--------------------------|
| chr8 | 124701250 | 124701350 | 1151-Lng-A-T | 270 | chr8:124701250-124701350 |
| chr8 | 124725750 | 124725850 | 1004-Lng-A-T | 71  | chr8:124725750-124725850 |
| chr8 | 124879450 | 124879550 | 1151-Lng-A-T | 56  | chr8:124879450-124879550 |
| chr8 | 124995650 | 124995750 | 1100-Lng-A-T | 87  | chr8:124995650-124995750 |
| chr8 | 125065750 | 125065850 | 1274-Lng-A-T | 55  | chr8:125065750-125065850 |
| chr8 | 125100150 | 125100250 | 1151-Lng-A-T | 80  | chr8:125100150-125100250 |
| chr8 | 125397350 | 125397450 | 1274-Lng-A-T | 165 | chr8:125397350-125397450 |
| chr8 | 125449550 | 125449650 | 1223-Lng-A-T | 141 | chr8:125449550-125449650 |
| chr8 | 125469250 | 125469350 | 1167-Lng-A-T | 68  | chr8:125469250-125469350 |
| chr8 | 125542150 | 125542250 | 1065-Lng-C-T | 101 | chr8:125542150-125542250 |
| chr8 | 125543750 | 125543850 | 1152-Lng-A-T | 171 | chr8:125543750-125543850 |
| chr8 | 125752450 | 125752550 | 901-Lng-B-T  | 70  | chr8:125752450-125752550 |
| chr8 | 125862050 | 125862150 | 1188-Lng-A-T | 66  | chr8:125862050-125862150 |
| chr8 | 125992950 | 125993050 | 1072-Lng-A-T | 272 | chr8:125992950-125993050 |
| chr8 | 126524450 | 126524550 | 1100-Lng-A-T | 93  | chr8:126524450-126524550 |
| chr8 | 126671450 | 126671550 | 1065-Lng-C-T | 83  | chr8:126671450-126671550 |
| chr8 | 126687350 | 126687450 | 1065-Lng-B-T | 43  | chr8:126687350-126687450 |
| chr8 | 126787750 | 126787850 | 1100-Lng-A-T | 126 | chr8:126787750-126787850 |
| chr8 | 127178650 | 127178750 | 1274-Lng-A-T | 91  | chr8:127178650-127178750 |
| chr8 | 127251650 | 127251750 | 1065-Lng-A-T | 63  | chr8:127251650-127251750 |
| chr8 | 127382350 | 127382450 | 1152-Lng-A-T | 125 | chr8:127382350-127382450 |
| chr8 | 127407550 | 127407650 | 1167-Lng-A-T | 83  | chr8:127407550-127407650 |
| chr8 | 127428650 | 127428750 | 1065-Lng-B-T | 49  | chr8:127428650-127428750 |
| chr8 | 127457250 | 127457350 | 1100-Lng-A-T | 81  | chr8:127457250-127457350 |
| chr8 | 127461150 | 127461250 | 1188-Lng-A-T | 55  | chr8:127461150-127461250 |
| chr8 | 127534950 | 127535050 | 1274-Lng-A-T | 51  | chr8:127534950-127535050 |
| chr8 | 128027250 | 128027350 | 846-Lng-A-T  | 141 | chr8:128027250-128027350 |
| chr8 | 128067750 | 128067850 | 1004-Lng-A-T | 74  | chr8:128067750-128067850 |
| chr8 | 128293050 | 128293150 | 1223-Lng-D-T | 44  | chr8:128293050-128293150 |
| chr8 | 128331150 | 128331250 | 1167-Lng-A-T | 74  | chr8:128331150-128331250 |
| chr8 | 128550450 | 128550550 | 1065-Lng-B-T | 40  | chr8:128550450-128550550 |
| chr8 | 129130050 | 129130150 | 1090-Lng-B-T | 178 | chr8:129130050-129130150 |
| chr8 | 129160950 | 129161050 | 1065-Lng-A-T | 66  | chr8:129160950-129161050 |
| chr8 | 129213850 | 129213950 | 1072-Lng-A-T | 54  | chr8:129213850-129213950 |
| chr8 | 129301450 | 129301550 | 901-Lng-C-T  | 45  | chr8:129301450-129301550 |
| chr8 | 129472750 | 129472850 | 1274-Lng-A-T | 83  | chr8:129472750-129472850 |
| chr8 | 129583450 | 129583550 | 1065-Lng-C-T | 65  | chr8:129583450-129583550 |
| chr8 | 129591650 | 129591750 | 1151-Lng-A-T | 70  | chr8:129591650-129591750 |
| chr8 | 129621750 | 129621850 | 1065-Lng-B-T | 67  | chr8:129621750-129621850 |
| chr8 | 129697350 | 129697450 | 1065-Lng-B-T | 102 | chr8:129697350-129697450 |
| chr8 | 129736650 | 129736750 | 1065-Lng-B-T | 66  | chr8:129736650-129736750 |
| chr8 | 129743650 | 129743750 | 1065-Lng-B-T | 63  | chr8:129743650-129743750 |
| chr8 | 129745850 | 129745950 | 1274-Lng-A-T | 49  | chr8:129745850-129745950 |
| chr8 | 129793550 | 129793650 | 1090-Lng-A-T | 122 | chr8:129793550-129793650 |
| chr8 | 129800750 | 129800850 | 1065-Lng-A-T | 117 | chr8:129800750-129800850 |
| chr8 | 129811450 | 129811550 | 1072-Lng-A-T | 48  | chr8:129811450-129811550 |

**Table S2: SB Insertion regions**

|      |           |           |              |     |                          |
|------|-----------|-----------|--------------|-----|--------------------------|
| chr8 | 129831050 | 129831150 | 1065-Lng-B-T | 122 | chr8:129831050-129831150 |
| chr8 | 129861050 | 129861150 | 1065-Lng-B-T | 63  | chr8:129861050-129861150 |
| chr8 | 129878850 | 129878950 | 1151-Lng-A-T | 207 | chr8:129878850-129878950 |
| chr8 | 129958650 | 129958750 | 1072-Lng-A-T | 50  | chr8:129958650-129958750 |
| chr8 | 129976150 | 129976250 | 1223-Lng-D-T | 42  | chr8:129976150-129976250 |
| chr8 | 130096050 | 130096150 | 1065-Lng-A-T | 263 | chr8:130096050-130096150 |
| chr8 | 130102450 | 130102550 | 1065-Lng-C-T | 61  | chr8:130102450-130102550 |
| chr8 | 130103950 | 130104050 | 1274-Lng-A-T | 71  | chr8:130103950-130104050 |
| chr8 | 130108950 | 130109050 | 1065-Lng-B-T | 42  | chr8:130108950-130109050 |
| chr8 | 130255450 | 130255550 | 1274-Lng-A-T | 147 | chr8:130255450-130255550 |
| chr8 | 130721050 | 130721150 | 1072-Lng-A-T | 60  | chr8:130721050-130721150 |
| chr8 | 130864350 | 130864450 | 901-Lng-B-T  | 274 | chr8:130864350-130864450 |
| chr8 | 130895550 | 130895650 | 1004-Lng-A-T | 95  | chr8:130895550-130895650 |
| chr8 | 130920550 | 130920650 | 1188-Lng-A-T | 66  | chr8:130920550-130920650 |
| chr8 | 130928550 | 130928650 | 1100-Lng-A-T | 134 | chr8:130928550-130928650 |
| chr8 | 130938050 | 130938150 | 1151-Lng-A-T | 183 | chr8:130938050-130938150 |
| chr8 | 130993450 | 130993550 | 1223-Lng-C-T | 49  | chr8:130993450-130993550 |
| chr8 | 131013950 | 131014050 | 901-Lng-C-T  | 179 | chr8:131013950-131014050 |
| chr8 | 131114550 | 131114650 | 901-Lng-D-T  | 532 | chr8:131114550-131114650 |
| chr8 | 131125350 | 131125450 | 1152-Lng-A-T | 45  | chr8:131125350-131125450 |
| chr8 | 131210550 | 131210650 | 1065-Lng-B-T | 50  | chr8:131210550-131210650 |
| chr8 | 131223350 | 131223450 | 1152-Lng-A-T | 86  | chr8:131223350-131223450 |
| chr8 | 131236450 | 131236550 | 1274-Lng-A-T | 56  | chr8:131236450-131236550 |
| chr8 | 131258750 | 131258850 | 901-Lng-A-T  | 84  | chr8:131258750-131258850 |
| chr9 | 3000050   | 3000150   | 901-Lng-C-T  | 46  | chr9:3000050-3000150     |
| chr9 | 3001050   | 3001150   | 1004-Lng-A-T | 81  | chr9:3001050-3001150     |
| chr9 | 3001050   | 3001150   | 1065-Lng-B-T | 60  | chr9:3001050-3001150     |
| chr9 | 3015250   | 3015350   | 1065-Lng-A-T | 53  | chr9:3015250-3015350     |
| chr9 | 3015250   | 3015350   | 1065-Lng-B-T | 73  | chr9:3015250-3015350     |
| chr9 | 3015250   | 3015350   | 1065-Lng-B-T | 39  | chr9:3015250-3015350     |
| chr9 | 3022450   | 3022550   | 901-Lng-C-T  | 38  | chr9:3022450-3022550     |
| chr9 | 3025450   | 3025550   | 901-Lng-A-T  | 66  | chr9:3025450-3025550     |
| chr9 | 3025450   | 3025550   | 1065-Lng-B-T | 129 | chr9:3025450-3025550     |
| chr9 | 3025450   | 3025550   | 846-Lng-A-T  | 57  | chr9:3025450-3025550     |
| chr9 | 3025450   | 3025550   | 1065-Lng-C-T | 108 | chr9:3025450-3025550     |
| chr9 | 3025450   | 3025550   | 1188-Lng-A-T | 45  | chr9:3025450-3025550     |
| chr9 | 3025450   | 3025550   | 1090-Lng-A-T | 212 | chr9:3025450-3025550     |
| chr9 | 3025450   | 3025550   | 901-Lng-C-T  | 42  | chr9:3025450-3025550     |
| chr9 | 3025450   | 3025550   | 1004-Lng-A-T | 629 | chr9:3025450-3025550     |
| chr9 | 3025450   | 3025550   | 1072-Lng-A-T | 66  | chr9:3025450-3025550     |
| chr9 | 3025450   | 3025550   | 1065-Lng-A-T | 176 | chr9:3025450-3025550     |
| chr9 | 3025450   | 3025550   | 1065-Lng-B-T | 372 | chr9:3025450-3025550     |
| chr9 | 3025450   | 3025550   | 901-Lng-B-T  | 185 | chr9:3025450-3025550     |
| chr9 | 3025450   | 3025550   | 1065-Lng-C-T | 273 | chr9:3025450-3025550     |
| chr9 | 3025450   | 3025550   | 1090-Lng-A-T | 83  | chr9:3025450-3025550     |
| chr9 | 3025450   | 3025550   | 901-Lng-C-T  | 50  | chr9:3025450-3025550     |

**Table S2: SB Insertion regions**

|      |         |         |              |     |                      |
|------|---------|---------|--------------|-----|----------------------|
| chr9 | 3025450 | 3025550 | 1004-Lng-A-T | 81  | chr9:3025450-3025550 |
| chr9 | 3025450 | 3025550 | 1072-Lng-A-T | 143 | chr9:3025450-3025550 |
| chr9 | 3025450 | 3025550 | 1065-Lng-A-T | 139 | chr9:3025450-3025550 |
| chr9 | 3027050 | 3027150 | 846-Lng-A-T  | 95  | chr9:3027050-3027150 |
| chr9 | 3027150 | 3027250 | 901-Lng-B-T  | 134 | chr9:3027150-3027250 |
| chr9 | 3027750 | 3027850 | 1004-Lng-A-T | 105 | chr9:3027750-3027850 |
| chr9 | 3030150 | 3030250 | 1004-Lng-A-T | 90  | chr9:3030150-3030250 |
| chr9 | 3031950 | 3032050 | 901-Lng-B-T  | 83  | chr9:3031950-3032050 |
| chr9 | 3035750 | 3035850 | 846-Lng-A-T  | 45  | chr9:3035750-3035850 |
| chr9 | 3035850 | 3035950 | 901-Lng-C-T  | 76  | chr9:3035850-3035950 |
| chr9 | 3036050 | 3036150 | 901-Lng-B-T  | 128 | chr9:3036050-3036150 |
| chr9 | 3036050 | 3036150 | 1223-Lng-C-T | 57  | chr9:3036050-3036150 |
| chr9 | 3036550 | 3036650 | 1065-Lng-C-T | 103 | chr9:3036550-3036650 |
| chr9 | 3036550 | 3036650 | 1072-Lng-A-T | 54  | chr9:3036550-3036650 |
| chr9 | 3134450 | 3134550 | 1090-Lng-B-T | 557 | chr9:3134450-3134550 |
| chr9 | 3312750 | 3312850 | 1065-Lng-A-T | 84  | chr9:3312750-3312850 |
| chr9 | 3586550 | 3586650 | 1223-Lng-A-T | 713 | chr9:3586550-3586650 |
| chr9 | 3696050 | 3696150 | 1151-Lng-A-T | 56  | chr9:3696050-3696150 |
| chr9 | 3716150 | 3716250 | 1065-Lng-A-T | 46  | chr9:3716150-3716250 |
| chr9 | 3739250 | 3739350 | 1090-Lng-B-T | 65  | chr9:3739250-3739350 |
| chr9 | 4012750 | 4012850 | 1152-Lng-A-T | 105 | chr9:4012750-4012850 |
| chr9 | 4030950 | 4031050 | 1090-Lng-B-T | 237 | chr9:4030950-4031050 |
| chr9 | 4648750 | 4648850 | 1152-Lng-A-T | 182 | chr9:4648750-4648850 |
| chr9 | 4749450 | 4749550 | 1065-Lng-B-T | 59  | chr9:4749450-4749550 |
| chr9 | 4753050 | 4753150 | 1065-Lng-A-T | 88  | chr9:4753050-4753150 |
| chr9 | 4827550 | 4827650 | 1167-Lng-A-T | 57  | chr9:4827550-4827650 |
| chr9 | 4889450 | 4889550 | 1167-Lng-A-T | 48  | chr9:4889450-4889550 |
| chr9 | 5323250 | 5323350 | 1223-Lng-C-T | 62  | chr9:5323250-5323350 |
| chr9 | 5464350 | 5464450 | 1152-Lng-A-T | 48  | chr9:5464350-5464450 |
| chr9 | 5558350 | 5558450 | 1152-Lng-A-T | 235 | chr9:5558350-5558450 |
| chr9 | 5913950 | 5914050 | 1065-Lng-C-T | 74  | chr9:5913950-5914050 |
| chr9 | 6042250 | 6042350 | 901-Lng-A-T  | 124 | chr9:6042250-6042350 |
| chr9 | 6068550 | 6068650 | 901-Lng-B-T  | 66  | chr9:6068550-6068650 |
| chr9 | 6303450 | 6303550 | 901-Lng-A-T  | 644 | chr9:6303450-6303550 |
| chr9 | 6385850 | 6385950 | 1223-Lng-B-T | 300 | chr9:6385850-6385950 |
| chr9 | 6614050 | 6614150 | 1188-Lng-A-T | 81  | chr9:6614050-6614150 |
| chr9 | 6848550 | 6848650 | 1004-Lng-A-T | 51  | chr9:6848550-6848650 |
| chr9 | 6982350 | 6982450 | 901-Lng-B-T  | 260 | chr9:6982350-6982450 |
| chr9 | 7177150 | 7177250 | 1090-Lng-A-T | 66  | chr9:7177150-7177250 |
| chr9 | 7186350 | 7186450 | 1065-Lng-B-T | 97  | chr9:7186350-7186450 |
| chr9 | 7191650 | 7191750 | 1100-Lng-A-T | 79  | chr9:7191650-7191750 |
| chr9 | 7208150 | 7208250 | 1223-Lng-C-T | 110 | chr9:7208150-7208250 |
| chr9 | 7431650 | 7431750 | 1004-Lng-A-T | 137 | chr9:7431650-7431750 |
| chr9 | 7580050 | 7580150 | 1188-Lng-A-T | 35  | chr9:7580050-7580150 |
| chr9 | 7598350 | 7598450 | 1065-Lng-B-T | 47  | chr9:7598350-7598450 |
| chr9 | 7660050 | 7660150 | 901-Lng-A-T  | 101 | chr9:7660050-7660150 |

**Table S2: SB Insertion regions**

|      |          |          |              |     |                        |
|------|----------|----------|--------------|-----|------------------------|
| chr9 | 7794350  | 7794450  | 1188-Lng-A-T | 97  | chr9:7794350-7794450   |
| chr9 | 7820750  | 7820850  | 1004-Lng-A-T | 62  | chr9:7820750-7820850   |
| chr9 | 7928750  | 7928850  | 1004-Lng-A-T | 49  | chr9:7928750-7928850   |
| chr9 | 7929250  | 7929350  | 1188-Lng-A-T | 295 | chr9:7929250-7929350   |
| chr9 | 7969350  | 7969450  | 901-Lng-A-T  | 63  | chr9:7969350-7969450   |
| chr9 | 7977850  | 7977950  | 1152-Lng-A-T | 85  | chr9:7977850-7977950   |
| chr9 | 7979450  | 7979550  | 1065-Lng-A-T | 46  | chr9:7979450-7979550   |
| chr9 | 8034550  | 8034650  | 1274-Lng-A-T | 245 | chr9:8034550-8034650   |
| chr9 | 8154350  | 8154450  | 901-Lng-B-T  | 425 | chr9:8154350-8154450   |
| chr9 | 8226750  | 8226850  | 1223-Lng-C-T | 54  | chr9:8226750-8226850   |
| chr9 | 8421850  | 8421950  | 1004-Lng-A-T | 91  | chr9:8421850-8421950   |
| chr9 | 8526850  | 8526950  | 1004-Lng-A-T | 53  | chr9:8526850-8526950   |
| chr9 | 8534950  | 8535050  | 901-Lng-B-T  | 35  | chr9:8534950-8535050   |
| chr9 | 8585450  | 8585550  | 1223-Lng-B-T | 37  | chr9:8585450-8585550   |
| chr9 | 8675250  | 8675350  | 1152-Lng-A-T | 67  | chr9:8675250-8675350   |
| chr9 | 8964850  | 8964950  | 1223-Lng-C-T | 46  | chr9:8964850-8964950   |
| chr9 | 8993650  | 8993750  | 1004-Lng-A-T | 120 | chr9:8993650-8993750   |
| chr9 | 9177750  | 9177850  | 1188-Lng-A-T | 69  | chr9:9177750-9177850   |
| chr9 | 9178450  | 9178550  | 1152-Lng-A-T | 204 | chr9:9178450-9178550   |
| chr9 | 9269750  | 9269850  | 1152-Lng-A-T | 219 | chr9:9269750-9269850   |
| chr9 | 9534050  | 9534150  | 901-Lng-C-T  | 34  | chr9:9534050-9534150   |
| chr9 | 9614850  | 9614950  | 1274-Lng-A-T | 71  | chr9:9614850-9614950   |
| chr9 | 10116850 | 10116950 | 1090-Lng-B-T | 293 | chr9:10116850-10116950 |
| chr9 | 10140250 | 10140350 | 1065-Lng-A-T | 120 | chr9:10140250-10140350 |
| chr9 | 10247650 | 10247750 | 1223-Lng-B-T | 41  | chr9:10247650-10247750 |
| chr9 | 10311950 | 10312050 | 1065-Lng-B-T | 79  | chr9:10311950-10312050 |
| chr9 | 10381150 | 10381250 | 1223-Lng-B-T | 48  | chr9:10381150-10381250 |
| chr9 | 10473850 | 10473950 | 1065-Lng-B-T | 64  | chr9:10473850-10473950 |
| chr9 | 10482750 | 10482850 | 901-Lng-D-T  | 37  | chr9:10482750-10482850 |
| chr9 | 10538350 | 10538450 | 1274-Lng-A-T | 61  | chr9:10538350-10538450 |
| chr9 | 10632450 | 10632550 | 901-Lng-B-T  | 73  | chr9:10632450-10632550 |
| chr9 | 10892550 | 10892650 | 1152-Lng-A-T | 113 | chr9:10892550-10892650 |
| chr9 | 11200150 | 11200250 | 846-Lng-A-T  | 91  | chr9:11200150-11200250 |
| chr9 | 11249950 | 11250050 | 1152-Lng-A-T | 39  | chr9:11249950-11250050 |
| chr9 | 11326750 | 11326850 | 1223-Lng-A-T | 127 | chr9:11326750-11326850 |
| chr9 | 11383850 | 11383950 | 1223-Lng-D-T | 53  | chr9:11383850-11383950 |
| chr9 | 11389950 | 11390050 | 1065-Lng-A-T | 72  | chr9:11389950-11390050 |
| chr9 | 11397650 | 11397750 | 1274-Lng-A-T | 50  | chr9:11397650-11397750 |
| chr9 | 11672850 | 11672950 | 1065-Lng-C-T | 93  | chr9:11672850-11672950 |
| chr9 | 11833450 | 11833550 | 901-Lng-D-T  | 520 | chr9:11833450-11833550 |
| chr9 | 12062950 | 12063050 | 1152-Lng-A-T | 90  | chr9:12062950-12063050 |
| chr9 | 12386750 | 12386850 | 1065-Lng-B-T | 176 | chr9:12386750-12386850 |
| chr9 | 12574050 | 12574150 | 1167-Lng-A-T | 53  | chr9:12574050-12574150 |
| chr9 | 12720250 | 12720350 | 1004-Lng-A-T | 73  | chr9:12720250-12720350 |
| chr9 | 12787150 | 12787250 | 1065-Lng-B-T | 56  | chr9:12787150-12787250 |
| chr9 | 13024050 | 13024150 | 1223-Lng-B-T | 39  | chr9:13024050-13024150 |

**Table S2: SB Insertion regions**

|      |          |          |              |      |                        |
|------|----------|----------|--------------|------|------------------------|
| chr9 | 13091450 | 13091550 | 1065-Lng-C-T | 76   | chr9:13091450-13091550 |
| chr9 | 13234650 | 13234750 | 1152-Lng-A-T | 62   | chr9:13234650-13234750 |
| chr9 | 13265850 | 13265950 | 1151-Lng-A-T | 54   | chr9:13265850-13265950 |
| chr9 | 13307450 | 13307550 | 901-Lng-A-T  | 403  | chr9:13307450-13307550 |
| chr9 | 13339250 | 13339350 | 1004-Lng-A-T | 60   | chr9:13339250-13339350 |
| chr9 | 13361350 | 13361450 | 846-Lng-A-T  | 889  | chr9:13361350-13361450 |
| chr9 | 13386350 | 13386450 | 1223-Lng-A-T | 66   | chr9:13386350-13386450 |
| chr9 | 13393750 | 13393850 | 901-Lng-D-T  | 302  | chr9:13393750-13393850 |
| chr9 | 13453150 | 13453250 | 901-Lng-C-T  | 44   | chr9:13453150-13453250 |
| chr9 | 13491550 | 13491650 | 901-Lng-C-T  | 56   | chr9:13491550-13491650 |
| chr9 | 13497650 | 13497750 | 846-Lng-A-T  | 94   | chr9:13497650-13497750 |
| chr9 | 13556050 | 13556150 | 1065-Lng-A-T | 41   | chr9:13556050-13556150 |
| chr9 | 13627550 | 13627650 | 1223-Lng-C-T | 43   | chr9:13627550-13627650 |
| chr9 | 13777350 | 13777450 | 1065-Lng-C-T | 1193 | chr9:13777350-13777450 |
| chr9 | 13856150 | 13856250 | 1167-Lng-A-T | 58   | chr9:13856150-13856250 |
| chr9 | 14092650 | 14092750 | 901-Lng-C-T  | 171  | chr9:14092650-14092750 |
| chr9 | 14095050 | 14095150 | 1152-Lng-A-T | 83   | chr9:14095050-14095150 |
| chr9 | 14121150 | 14121250 | 1152-Lng-A-T | 48   | chr9:14121150-14121250 |
| chr9 | 14134850 | 14134950 | 1274-Lng-A-T | 170  | chr9:14134850-14134950 |
| chr9 | 14138850 | 14138950 | 901-Lng-C-T  | 97   | chr9:14138850-14138950 |
| chr9 | 14180150 | 14180250 | 901-Lng-D-T  | 218  | chr9:14180150-14180250 |
| chr9 | 14264550 | 14264650 | 901-Lng-B-T  | 67   | chr9:14264550-14264650 |
| chr9 | 14299850 | 14299950 | 1223-Lng-D-T | 46   | chr9:14299850-14299950 |
| chr9 | 14327450 | 14327550 | 1274-Lng-A-T | 59   | chr9:14327450-14327550 |
| chr9 | 14349450 | 14349550 | 1065-Lng-B-T | 57   | chr9:14349450-14349550 |
| chr9 | 14480650 | 14480750 | 1274-Lng-A-T | 61   | chr9:14480650-14480750 |
| chr9 | 14577650 | 14577750 | 1223-Lng-C-T | 53   | chr9:14577650-14577750 |
| chr9 | 14620050 | 14620150 | 846-Lng-A-T  | 127  | chr9:14620050-14620150 |
| chr9 | 14663350 | 14663450 | 1151-Lng-A-T | 58   | chr9:14663350-14663450 |
| chr9 | 14749250 | 14749350 | 1167-Lng-A-T | 76   | chr9:14749250-14749350 |
| chr9 | 15433550 | 15433650 | 901-Lng-A-T  | 242  | chr9:15433550-15433650 |
| chr9 | 15606450 | 15606550 | 1065-Lng-A-T | 137  | chr9:15606450-15606550 |
| chr9 | 15783950 | 15784050 | 1090-Lng-A-T | 102  | chr9:15783950-15784050 |
| chr9 | 15799950 | 15800050 | 1065-Lng-A-T | 103  | chr9:15799950-15800050 |
| chr9 | 15898350 | 15898450 | 1065-Lng-A-T | 64   | chr9:15898350-15898450 |
| chr9 | 15987950 | 15988050 | 1151-Lng-A-T | 289  | chr9:15987950-15988050 |
| chr9 | 16073450 | 16073550 | 846-Lng-A-T  | 1056 | chr9:16073450-16073550 |
| chr9 | 16096350 | 16096450 | 1223-Lng-B-T | 188  | chr9:16096350-16096450 |
| chr9 | 16249850 | 16249950 | 846-Lng-A-T  | 149  | chr9:16249850-16249950 |
| chr9 | 16607550 | 16607650 | 1090-Lng-A-T | 56   | chr9:16607550-16607650 |
| chr9 | 16732550 | 16732650 | 846-Lng-A-T  | 82   | chr9:16732550-16732650 |
| chr9 | 16758750 | 16758850 | 901-Lng-C-T  | 42   | chr9:16758750-16758850 |
| chr9 | 16899050 | 16899150 | 1090-Lng-B-T | 647  | chr9:16899050-16899150 |
| chr9 | 17219750 | 17219850 | 1065-Lng-B-T | 61   | chr9:17219750-17219850 |
| chr9 | 17319950 | 17320050 | 901-Lng-A-T  | 75   | chr9:17319950-17320050 |
| chr9 | 17426950 | 17427050 | 846-Lng-A-T  | 137  | chr9:17426950-17427050 |

**Table S2: SB Insertion regions**

|      |          |          |              |     |                        |
|------|----------|----------|--------------|-----|------------------------|
| chr9 | 17675250 | 17675350 | 846-Lng-A-T  | 188 | chr9:17675250-17675350 |
| chr9 | 17764250 | 17764350 | 901-Lng-A-T  | 52  | chr9:17764250-17764350 |
| chr9 | 17879750 | 17879850 | 901-Lng-B-T  | 47  | chr9:17879750-17879850 |
| chr9 | 17884250 | 17884350 | 1167-Lng-A-T | 89  | chr9:17884250-17884350 |
| chr9 | 18127450 | 18127550 | 901-Lng-B-T  | 79  | chr9:18127450-18127550 |
| chr9 | 18210950 | 18211050 | 1065-Lng-B-T | 50  | chr9:18210950-18211050 |
| chr9 | 18465650 | 18465750 | 1223-Lng-D-T | 55  | chr9:18465650-18465750 |
| chr9 | 18471650 | 18471750 | 901-Lng-C-T  | 164 | chr9:18471650-18471750 |
| chr9 | 18482650 | 18482750 | 1072-Lng-A-T | 196 | chr9:18482650-18482750 |
| chr9 | 18678250 | 18678350 | 1152-Lng-A-T | 84  | chr9:18678250-18678350 |
| chr9 | 18801850 | 18801950 | 1090-Lng-A-T | 100 | chr9:18801850-18801950 |
| chr9 | 19140250 | 19140350 | 1072-Lng-A-T | 48  | chr9:19140250-19140350 |
| chr9 | 19250650 | 19250750 | 1188-Lng-A-T | 50  | chr9:19250650-19250750 |
| chr9 | 19345150 | 19345250 | 901-Lng-A-T  | 253 | chr9:19345150-19345250 |
| chr9 | 19431250 | 19431350 | 1223-Lng-B-T | 201 | chr9:19431250-19431350 |
| chr9 | 19432650 | 19432750 | 1100-Lng-B-T | 303 | chr9:19432650-19432750 |
| chr9 | 19436350 | 19436450 | 1065-Lng-A-T | 58  | chr9:19436350-19436450 |
| chr9 | 19490750 | 19490850 | 1274-Lng-A-T | 124 | chr9:19490750-19490850 |
| chr9 | 19497250 | 19497350 | 1072-Lng-A-T | 56  | chr9:19497250-19497350 |
| chr9 | 19691450 | 19691550 | 1152-Lng-A-T | 88  | chr9:19691450-19691550 |
| chr9 | 19753650 | 19753750 | 1188-Lng-A-T | 47  | chr9:19753650-19753750 |
| chr9 | 19793350 | 19793450 | 1072-Lng-A-T | 79  | chr9:19793350-19793450 |
| chr9 | 19864650 | 19864750 | 1065-Lng-C-T | 66  | chr9:19864650-19864750 |
| chr9 | 20088850 | 20088950 | 1065-Lng-B-T | 90  | chr9:20088850-20088950 |
| chr9 | 20120550 | 20120650 | 1065-Lng-C-T | 64  | chr9:20120550-20120650 |
| chr9 | 20261850 | 20261950 | 1274-Lng-A-T | 69  | chr9:20261850-20261950 |
| chr9 | 20309250 | 20309350 | 1223-Lng-C-T | 55  | chr9:20309250-20309350 |
| chr9 | 20335450 | 20335550 | 1223-Lng-D-T | 47  | chr9:20335450-20335550 |
| chr9 | 20389350 | 20389450 | 1274-Lng-A-T | 164 | chr9:20389350-20389450 |
| chr9 | 20527550 | 20527650 | 901-Lng-A-T  | 393 | chr9:20527550-20527650 |
| chr9 | 20778850 | 20778950 | 901-Lng-B-T  | 295 | chr9:20778850-20778950 |
| chr9 | 20800950 | 20801050 | 1100-Lng-A-T | 102 | chr9:20800950-20801050 |
| chr9 | 21191050 | 21191150 | 1188-Lng-A-T | 118 | chr9:21191050-21191150 |
| chr9 | 21193250 | 21193350 | 1004-Lng-A-T | 84  | chr9:21193250-21193350 |
| chr9 | 21193250 | 21193350 | 1072-Lng-A-T | 120 | chr9:21193250-21193350 |
| chr9 | 21231250 | 21231350 | 1065-Lng-A-T | 56  | chr9:21231250-21231350 |
| chr9 | 21294850 | 21294950 | 901-Lng-C-T  | 30  | chr9:21294850-21294950 |
| chr9 | 21380750 | 21380850 | 1152-Lng-A-T | 54  | chr9:21380750-21380850 |
| chr9 | 21385350 | 21385450 | 1223-Lng-C-T | 48  | chr9:21385350-21385450 |
| chr9 | 21428450 | 21428550 | 901-Lng-C-T  | 43  | chr9:21428450-21428550 |
| chr9 | 21434250 | 21434350 | 1065-Lng-B-T | 45  | chr9:21434250-21434350 |
| chr9 | 21479850 | 21479950 | 1004-Lng-A-T | 65  | chr9:21479850-21479950 |
| chr9 | 21484450 | 21484550 | 1065-Lng-B-T | 413 | chr9:21484450-21484550 |
| chr9 | 21645150 | 21645250 | 1065-Lng-A-T | 99  | chr9:21645150-21645250 |
| chr9 | 21826750 | 21826850 | 1274-Lng-A-T | 72  | chr9:21826750-21826850 |
| chr9 | 22015350 | 22015450 | 846-Lng-A-T  | 176 | chr9:22015350-22015450 |



**Table S2: SB Insertion regions**

|      |          |          |              |      |                        |
|------|----------|----------|--------------|------|------------------------|
| chr9 | 22037250 | 22037350 | 1100-Lng-A-T | 113  | chr9:22037250-22037350 |
| chr9 | 22047150 | 22047250 | 901-Lng-B-T  | 122  | chr9:22047150-22047250 |
| chr9 | 22400350 | 22400450 | 1065-Lng-B-T | 57   | chr9:22400350-22400450 |
| chr9 | 22421350 | 22421450 | 1065-Lng-A-T | 45   | chr9:22421350-22421450 |
| chr9 | 22465950 | 22466050 | 1065-Lng-C-T | 230  | chr9:22465950-22466050 |
| chr9 | 22926950 | 22927050 | 1065-Lng-C-T | 1215 | chr9:22926950-22927050 |
| chr9 | 22970550 | 22970650 | 1072-Lng-A-T | 229  | chr9:22970550-22970650 |
| chr9 | 23002950 | 23003050 | 1090-Lng-A-T | 68   | chr9:23002950-23003050 |
| chr9 | 23603950 | 23604050 | 1065-Lng-B-T | 70   | chr9:23603950-23604050 |
| chr9 | 23929350 | 23929450 | 1152-Lng-A-T | 32   | chr9:23929350-23929450 |
| chr9 | 23972050 | 23972150 | 846-Lng-A-T  | 189  | chr9:23972050-23972150 |
| chr9 | 24207550 | 24207650 | 1065-Lng-A-T | 55   | chr9:24207550-24207650 |
| chr9 | 24346550 | 24346650 | 1065-Lng-C-T | 96   | chr9:24346550-24346650 |
| chr9 | 24714050 | 24714150 | 1090-Lng-A-T | 44   | chr9:24714050-24714150 |
| chr9 | 24773250 | 24773350 | 1151-Lng-A-T | 91   | chr9:24773250-24773350 |
| chr9 | 24907350 | 24907450 | 1223-Lng-B-T | 41   | chr9:24907350-24907450 |
| chr9 | 24920650 | 24920750 | 1223-Lng-B-T | 217  | chr9:24920650-24920750 |
| chr9 | 24940650 | 24940750 | 1223-Lng-B-T | 274  | chr9:24940650-24940750 |
| chr9 | 25074650 | 25074750 | 1223-Lng-C-T | 147  | chr9:25074650-25074750 |
| chr9 | 25088950 | 25089050 | 1274-Lng-A-T | 179  | chr9:25088950-25089050 |
| chr9 | 25094050 | 25094150 | 1223-Lng-B-T | 149  | chr9:25094050-25094150 |
| chr9 | 25095850 | 25095950 | 1072-Lng-A-T | 142  | chr9:25095850-25095950 |
| chr9 | 25099350 | 25099450 | 1065-Lng-B-T | 72   | chr9:25099350-25099450 |
| chr9 | 25112050 | 25112150 | 1223-Lng-C-T | 77   | chr9:25112050-25112150 |
| chr9 | 25112050 | 25112150 | 1004-Lng-A-T | 91   | chr9:25112050-25112150 |
| chr9 | 25120050 | 25120150 | 1152-Lng-A-T | 49   | chr9:25120050-25120150 |
| chr9 | 25472250 | 25472350 | 901-Lng-B-T  | 240  | chr9:25472250-25472350 |
| chr9 | 25539550 | 25539650 | 901-Lng-B-T  | 49   | chr9:25539550-25539650 |
| chr9 | 25874150 | 25874250 | 1152-Lng-A-T | 88   | chr9:25874150-25874250 |
| chr9 | 26332150 | 26332250 | 1065-Lng-A-T | 52   | chr9:26332150-26332250 |
| chr9 | 26580250 | 26580350 | 1090-Lng-A-T | 165  | chr9:26580250-26580350 |
| chr9 | 26803450 | 26803550 | 1151-Lng-A-T | 98   | chr9:26803450-26803550 |
| chr9 | 26833750 | 26833850 | 1065-Lng-B-T | 43   | chr9:26833750-26833850 |
| chr9 | 27064750 | 27064850 | 1223-Lng-A-T | 119  | chr9:27064750-27064850 |
| chr9 | 27241150 | 27241250 | 1065-Lng-B-T | 43   | chr9:27241150-27241250 |
| chr9 | 27484850 | 27484950 | 1152-Lng-A-T | 92   | chr9:27484850-27484950 |
| chr9 | 27570450 | 27570550 | 1065-Lng-A-T | 83   | chr9:27570450-27570550 |
| chr9 | 27661350 | 27661450 | 1223-Lng-B-T | 34   | chr9:27661350-27661450 |
| chr9 | 27716550 | 27716650 | 1065-Lng-B-T | 53   | chr9:27716550-27716650 |
| chr9 | 27816250 | 27816350 | 901-Lng-A-T  | 467  | chr9:27816250-27816350 |
| chr9 | 28124550 | 28124650 | 901-Lng-D-T  | 36   | chr9:28124550-28124650 |
| chr9 | 28769050 | 28769150 | 1072-Lng-A-T | 53   | chr9:28769050-28769150 |
| chr9 | 28778750 | 28778850 | 1223-Lng-B-T | 41   | chr9:28778750-28778850 |
| chr9 | 29096450 | 29096550 | 1004-Lng-A-T | 230  | chr9:29096450-29096550 |
| chr9 | 29194950 | 29195050 | 1065-Lng-B-T | 45   | chr9:29194950-29195050 |
| chr9 | 29418150 | 29418250 | 1223-Lng-B-T | 38   | chr9:29418150-29418250 |

**Table S2: SB Insertion regions**

|      |          |          |              |     |                        |
|------|----------|----------|--------------|-----|------------------------|
| chr9 | 29521050 | 29521150 | 1004-Lng-A-T | 94  | chr9:29521050-29521150 |
| chr9 | 29766350 | 29766450 | 1223-Lng-D-T | 42  | chr9:29766350-29766450 |
| chr9 | 29807250 | 29807350 | 1100-Lng-A-T | 64  | chr9:29807250-29807350 |
| chr9 | 29927150 | 29927250 | 901-Lng-C-T  | 51  | chr9:29927150-29927250 |
| chr9 | 29941750 | 29941850 | 846-Lng-A-T  | 80  | chr9:29941750-29941850 |
| chr9 | 30055250 | 30055350 | 1151-Lng-A-T | 457 | chr9:30055250-30055350 |
| chr9 | 30102950 | 30103050 | 1072-Lng-A-T | 68  | chr9:30102950-30103050 |
| chr9 | 30246650 | 30246750 | 1065-Lng-A-T | 38  | chr9:30246650-30246750 |
| chr9 | 30261250 | 30261350 | 1151-Lng-A-T | 236 | chr9:30261250-30261350 |
| chr9 | 30267650 | 30267750 | 1274-Lng-A-T | 66  | chr9:30267650-30267750 |
| chr9 | 30544150 | 30544250 | 1274-Lng-A-T | 58  | chr9:30544150-30544250 |
| chr9 | 30595850 | 30595950 | 1065-Lng-A-T | 41  | chr9:30595850-30595950 |
| chr9 | 30633350 | 30633450 | 901-Lng-A-T  | 74  | chr9:30633350-30633450 |
| chr9 | 30813050 | 30813150 | 1090-Lng-B-T | 492 | chr9:30813050-30813150 |
| chr9 | 30840650 | 30840750 | 901-Lng-A-T  | 67  | chr9:30840650-30840750 |
| chr9 | 30844250 | 30844350 | 1223-Lng-C-T | 74  | chr9:30844250-30844350 |
| chr9 | 30866650 | 30866750 | 1223-Lng-D-T | 41  | chr9:30866650-30866750 |
| chr9 | 30918650 | 30918750 | 1223-Lng-D-T | 56  | chr9:30918650-30918750 |
| chr9 | 30919150 | 30919250 | 1274-Lng-A-T | 129 | chr9:30919150-30919250 |
| chr9 | 30954250 | 30954350 | 1223-Lng-A-T | 52  | chr9:30954250-30954350 |
| chr9 | 30978750 | 30978850 | 1100-Lng-A-T | 91  | chr9:30978750-30978850 |
| chr9 | 31006250 | 31006350 | 1072-Lng-A-T | 54  | chr9:31006250-31006350 |
| chr9 | 31012550 | 31012650 | 846-Lng-A-T  | 179 | chr9:31012550-31012650 |
| chr9 | 31013650 | 31013750 | 1065-Lng-A-T | 56  | chr9:31013650-31013750 |
| chr9 | 31126450 | 31126550 | 1090-Lng-A-T | 73  | chr9:31126450-31126550 |
| chr9 | 31143150 | 31143250 | 1065-Lng-B-T | 63  | chr9:31143150-31143250 |
| chr9 | 31430050 | 31430150 | 1152-Lng-A-T | 161 | chr9:31430050-31430150 |
| chr9 | 31940850 | 31940950 | 1152-Lng-A-T | 113 | chr9:31940850-31940950 |
| chr9 | 32016450 | 32016550 | 1090-Lng-A-T | 144 | chr9:32016450-32016550 |
| chr9 | 32468850 | 32468950 | 901-Lng-A-T  | 70  | chr9:32468850-32468950 |
| chr9 | 32679450 | 32679550 | 1065-Lng-B-T | 50  | chr9:32679450-32679550 |
| chr9 | 32953550 | 32953650 | 901-Lng-B-T  | 49  | chr9:32953550-32953650 |
| chr9 | 33348050 | 33348150 | 901-Lng-C-T  | 54  | chr9:33348050-33348150 |
| chr9 | 33539450 | 33539550 | 901-Lng-C-T  | 36  | chr9:33539450-33539550 |
| chr9 | 34077350 | 34077450 | 1223-Lng-B-T | 112 | chr9:34077350-34077450 |
| chr9 | 34263150 | 34263250 | 1223-Lng-B-T | 59  | chr9:34263150-34263250 |
| chr9 | 34341150 | 34341250 | 1065-Lng-B-T | 373 | chr9:34341150-34341250 |
| chr9 | 34386150 | 34386250 | 1065-Lng-B-T | 47  | chr9:34386150-34386250 |
| chr9 | 34659750 | 34659850 | 901-Lng-A-T  | 90  | chr9:34659750-34659850 |
| chr9 | 34811250 | 34811350 | 1274-Lng-A-T | 67  | chr9:34811250-34811350 |
| chr9 | 34849350 | 34849450 | 1065-Lng-C-T | 88  | chr9:34849350-34849450 |
| chr9 | 34868550 | 34868650 | 1004-Lng-A-T | 56  | chr9:34868550-34868650 |
| chr9 | 34909550 | 34909650 | 1065-Lng-C-T | 134 | chr9:34909550-34909650 |
| chr9 | 34955550 | 34955650 | 1065-Lng-A-T | 42  | chr9:34955550-34955650 |
| chr9 | 34969950 | 34970050 | 1065-Lng-A-T | 79  | chr9:34969950-34970050 |
| chr9 | 34982550 | 34982650 | 1223-Lng-B-T | 40  | chr9:34982550-34982650 |

**Table S2: SB Insertion regions**

|      |          |          |              |     |                        |
|------|----------|----------|--------------|-----|------------------------|
| chr9 | 35112950 | 35113050 | 1223-Lng-A-T | 69  | chr9:35112950-35113050 |
| chr9 | 35113050 | 35113150 | 1065-Lng-B-T | 45  | chr9:35113050-35113150 |
| chr9 | 35113150 | 35113250 | 1065-Lng-B-T | 55  | chr9:35113150-35113250 |
| chr9 | 35113150 | 35113250 | 1065-Lng-C-T | 78  | chr9:35113150-35113250 |
| chr9 | 35181450 | 35181550 | 1072-Lng-A-T | 103 | chr9:35181450-35181550 |
| chr9 | 35273350 | 35273450 | 1223-Lng-B-T | 113 | chr9:35273350-35273450 |
| chr9 | 35485150 | 35485250 | 1152-Lng-A-T | 109 | chr9:35485150-35485250 |
| chr9 | 35652650 | 35652750 | 1065-Lng-A-T | 101 | chr9:35652650-35652750 |
| chr9 | 35707150 | 35707250 | 901-Lng-B-T  | 165 | chr9:35707150-35707250 |
| chr9 | 36113450 | 36113550 | 1065-Lng-B-T | 400 | chr9:36113450-36113550 |
| chr9 | 36125750 | 36125850 | 901-Lng-A-T  | 68  | chr9:36125750-36125850 |
| chr9 | 36197850 | 36197950 | 1065-Lng-C-T | 86  | chr9:36197850-36197950 |
| chr9 | 36525050 | 36525150 | 1274-Lng-A-T | 163 | chr9:36525050-36525150 |
| chr9 | 36543450 | 36543550 | 1167-Lng-A-T | 82  | chr9:36543450-36543550 |
| chr9 | 36559350 | 36559450 | 1004-Lng-A-T | 56  | chr9:36559350-36559450 |
| chr9 | 36608350 | 36608450 | 1072-Lng-A-T | 94  | chr9:36608350-36608450 |
| chr9 | 36670350 | 36670450 | 846-Lng-A-T  | 566 | chr9:36670350-36670450 |
| chr9 | 36906950 | 36907050 | 1223-Lng-B-T | 82  | chr9:36906950-36907050 |
| chr9 | 37153250 | 37153350 | 1223-Lng-B-T | 36  | chr9:37153250-37153350 |
| chr9 | 37154950 | 37155050 | 1223-Lng-B-T | 34  | chr9:37154950-37155050 |
| chr9 | 37176950 | 37177050 | 1004-Lng-A-T | 62  | chr9:37176950-37177050 |
| chr9 | 37214850 | 37214950 | 1065-Lng-C-T | 133 | chr9:37214850-37214950 |
| chr9 | 37305450 | 37305550 | 1274-Lng-A-T | 93  | chr9:37305450-37305550 |
| chr9 | 37312650 | 37312750 | 1004-Lng-A-T | 85  | chr9:37312650-37312750 |
| chr9 | 37348350 | 37348450 | 1167-Lng-A-T | 60  | chr9:37348350-37348450 |
| chr9 | 37354850 | 37354950 | 901-Lng-B-T  | 113 | chr9:37354850-37354950 |
| chr9 | 37390050 | 37390150 | 1100-Lng-A-T | 54  | chr9:37390050-37390150 |
| chr9 | 37488950 | 37489050 | 1223-Lng-D-T | 60  | chr9:37488950-37489050 |
| chr9 | 37787350 | 37787450 | 901-Lng-A-T  | 91  | chr9:37787350-37787450 |
| chr9 | 37867050 | 37867150 | 1065-Lng-A-T | 77  | chr9:37867050-37867150 |
| chr9 | 37954850 | 37954950 | 1090-Lng-A-T | 100 | chr9:37954850-37954950 |
| chr9 | 38603850 | 38603950 | 1065-Lng-B-T | 108 | chr9:38603850-38603950 |
| chr9 | 38691850 | 38691950 | 1152-Lng-A-T | 54  | chr9:38691850-38691950 |
| chr9 | 38785950 | 38786050 | 1090-Lng-A-T | 75  | chr9:38785950-38786050 |
| chr9 | 38800150 | 38800250 | 1090-Lng-B-T | 127 | chr9:38800150-38800250 |
| chr9 | 38902750 | 38902850 | 1100-Lng-A-T | 55  | chr9:38902750-38902850 |
| chr9 | 38922850 | 38922950 | 901-Lng-C-T  | 131 | chr9:38922850-38922950 |
| chr9 | 38989450 | 38989550 | 1223-Lng-A-T | 159 | chr9:38989450-38989550 |
| chr9 | 39025350 | 39025450 | 1065-Lng-A-T | 76  | chr9:39025350-39025450 |
| chr9 | 39287950 | 39288050 | 901-Lng-B-T  | 113 | chr9:39287950-39288050 |
| chr9 | 39288750 | 39288850 | 1223-Lng-C-T | 53  | chr9:39288750-39288850 |
| chr9 | 39289350 | 39289450 | 1065-Lng-C-T | 79  | chr9:39289350-39289450 |
| chr9 | 39311050 | 39311150 | 1223-Lng-D-T | 42  | chr9:39311050-39311150 |
| chr9 | 39429750 | 39429850 | 1065-Lng-B-T | 49  | chr9:39429750-39429850 |
| chr9 | 39781350 | 39781450 | 1223-Lng-D-T | 42  | chr9:39781350-39781450 |
| chr9 | 39945350 | 39945450 | 1223-Lng-C-T | 49  | chr9:39945350-39945450 |

**Table S2: SB Insertion regions**

|      |          |          |              |     |                        |
|------|----------|----------|--------------|-----|------------------------|
| chr9 | 40054850 | 40054950 | 901-Lng-C-T  | 87  | chr9:40054850-40054950 |
| chr9 | 40120750 | 40120850 | 1167-Lng-A-T | 81  | chr9:40120750-40120850 |
| chr9 | 40121150 | 40121250 | 901-Lng-C-T  | 33  | chr9:40121150-40121250 |
| chr9 | 40172750 | 40172850 | 1100-Lng-A-T | 91  | chr9:40172750-40172850 |
| chr9 | 40193250 | 40193350 | 1274-Lng-A-T | 229 | chr9:40193250-40193350 |
| chr9 | 40324850 | 40324950 | 1152-Lng-A-T | 314 | chr9:40324850-40324950 |
| chr9 | 40602850 | 40602950 | 1223-Lng-B-T | 35  | chr9:40602850-40602950 |
| chr9 | 40773050 | 40773150 | 1223-Lng-A-T | 87  | chr9:40773050-40773150 |
| chr9 | 41801450 | 41801550 | 846-Lng-A-T  | 102 | chr9:41801450-41801550 |
| chr9 | 41868250 | 41868350 | 1274-Lng-A-T | 77  | chr9:41868250-41868350 |
| chr9 | 41996350 | 41996450 | 1274-Lng-A-T | 65  | chr9:41996350-41996450 |
| chr9 | 42225050 | 42225150 | 1004-Lng-A-T | 58  | chr9:42225050-42225150 |
| chr9 | 42227650 | 42227750 | 1065-Lng-A-T | 51  | chr9:42227650-42227750 |
| chr9 | 42433550 | 42433650 | 1152-Lng-A-T | 38  | chr9:42433550-42433650 |
| chr9 | 42770450 | 42770550 | 1100-Lng-A-T | 270 | chr9:42770450-42770550 |
| chr9 | 42788450 | 42788550 | 1223-Lng-B-T | 49  | chr9:42788450-42788550 |
| chr9 | 42870250 | 42870350 | 1188-Lng-A-T | 128 | chr9:42870250-42870350 |
| chr9 | 42908050 | 42908150 | 1223-Lng-A-T | 986 | chr9:42908050-42908150 |
| chr9 | 43130450 | 43130550 | 1065-Lng-A-T | 106 | chr9:43130450-43130550 |
| chr9 | 43836750 | 43836850 | 1072-Lng-A-T | 48  | chr9:43836750-43836850 |
| chr9 | 44127050 | 44127150 | 1223-Lng-C-T | 56  | chr9:44127050-44127150 |
| chr9 | 44143950 | 44144050 | 1100-Lng-A-T | 87  | chr9:44143950-44144050 |
| chr9 | 44303950 | 44304050 | 1100-Lng-A-T | 86  | chr9:44303950-44304050 |
| chr9 | 44304250 | 44304350 | 1274-Lng-A-T | 60  | chr9:44304250-44304350 |
| chr9 | 44389450 | 44389550 | 1152-Lng-A-T | 99  | chr9:44389450-44389550 |
| chr9 | 44390050 | 44390150 | 1274-Lng-A-T | 150 | chr9:44390050-44390150 |
| chr9 | 44419250 | 44419350 | 1223-Lng-B-T | 52  | chr9:44419250-44419350 |
| chr9 | 44555950 | 44556050 | 1274-Lng-A-T | 56  | chr9:44555950-44556050 |
| chr9 | 44685250 | 44685350 | 901-Lng-A-T  | 136 | chr9:44685250-44685350 |
| chr9 | 44707950 | 44708050 | 1223-Lng-B-T | 45  | chr9:44707950-44708050 |
| chr9 | 44881950 | 44882050 | 1072-Lng-A-T | 195 | chr9:44881950-44882050 |
| chr9 | 44961450 | 44961550 | 1100-Lng-A-T | 73  | chr9:44961450-44961550 |
| chr9 | 45029750 | 45029850 | 1274-Lng-A-T | 124 | chr9:45029750-45029850 |
| chr9 | 45123150 | 45123250 | 1065-Lng-A-T | 103 | chr9:45123150-45123250 |
| chr9 | 45791850 | 45791950 | 1274-Lng-A-T | 150 | chr9:45791850-45791950 |
| chr9 | 45858550 | 45858650 | 1223-Lng-D-T | 44  | chr9:45858550-45858650 |
| chr9 | 45859250 | 45859350 | 1152-Lng-A-T | 199 | chr9:45859250-45859350 |
| chr9 | 45884450 | 45884550 | 1151-Lng-A-T | 68  | chr9:45884450-45884550 |
| chr9 | 45901850 | 45901950 | 1090-Lng-A-T | 55  | chr9:45901850-45901950 |
| chr9 | 45919250 | 45919350 | 1065-Lng-B-T | 43  | chr9:45919250-45919350 |
| chr9 | 45919450 | 45919550 | 1090-Lng-A-T | 99  | chr9:45919450-45919550 |
| chr9 | 45977350 | 45977450 | 1274-Lng-A-T | 77  | chr9:45977350-45977450 |
| chr9 | 46036050 | 46036150 | 1274-Lng-A-T | 50  | chr9:46036050-46036150 |
| chr9 | 46843150 | 46843250 | 1223-Lng-B-T | 52  | chr9:46843150-46843250 |
| chr9 | 46848550 | 46848650 | 901-Lng-A-T  | 105 | chr9:46848550-46848650 |
| chr9 | 46943550 | 46943650 | 1223-Lng-C-T | 59  | chr9:46943550-46943650 |

**Table S2: SB Insertion regions**

|      |          |          |              |     |                        |
|------|----------|----------|--------------|-----|------------------------|
| chr9 | 46986350 | 46986450 | 1223-Lng-A-T | 72  | chr9:46986350-46986450 |
| chr9 | 47218050 | 47218150 | 1152-Lng-A-T | 42  | chr9:47218050-47218150 |
| chr9 | 47300150 | 47300250 | 1274-Lng-A-T | 77  | chr9:47300150-47300250 |
| chr9 | 47361150 | 47361250 | 1065-Lng-B-T | 45  | chr9:47361150-47361250 |
| chr9 | 47467650 | 47467750 | 901-Lng-B-T  | 132 | chr9:47467650-47467750 |
| chr9 | 47522650 | 47522750 | 846-Lng-A-T  | 134 | chr9:47522650-47522750 |
| chr9 | 47966050 | 47966150 | 1065-Lng-A-T | 82  | chr9:47966050-47966150 |
| chr9 | 48595950 | 48596050 | 1188-Lng-A-T | 34  | chr9:48595950-48596050 |
| chr9 | 48845050 | 48845150 | 1151-Lng-A-T | 55  | chr9:48845050-48845150 |
| chr9 | 48975750 | 48975850 | 1090-Lng-A-T | 50  | chr9:48975750-48975850 |
| chr9 | 49086950 | 49087050 | 846-Lng-A-T  | 51  | chr9:49086950-49087050 |
| chr9 | 49490950 | 49491050 | 1090-Lng-A-T | 78  | chr9:49490950-49491050 |
| chr9 | 49781950 | 49782050 | 1065-Lng-C-T | 64  | chr9:49781950-49782050 |
| chr9 | 49872050 | 49872150 | 846-Lng-A-T  | 65  | chr9:49872050-49872150 |
| chr9 | 49957450 | 49957550 | 1152-Lng-A-T | 221 | chr9:49957450-49957550 |
| chr9 | 50408250 | 50408350 | 1065-Lng-B-T | 584 | chr9:50408250-50408350 |
| chr9 | 50423150 | 50423250 | 1223-Lng-D-T | 45  | chr9:50423150-50423250 |
| chr9 | 50463750 | 50463850 | 1167-Lng-A-T | 45  | chr9:50463750-50463850 |
| chr9 | 50469750 | 50469850 | 1065-Lng-C-T | 525 | chr9:50469750-50469850 |
| chr9 | 50617650 | 50617750 | 1100-Lng-B-T | 50  | chr9:50617650-50617750 |
| chr9 | 50618650 | 50618750 | 1223-Lng-C-T | 43  | chr9:50618650-50618750 |
| chr9 | 50734450 | 50734550 | 1152-Lng-A-T | 98  | chr9:50734450-50734550 |
| chr9 | 50772050 | 50772150 | 1072-Lng-A-T | 164 | chr9:50772050-50772150 |
| chr9 | 50780950 | 50781050 | 901-Lng-B-T  | 223 | chr9:50780950-50781050 |
| chr9 | 51399050 | 51399150 | 1100-Lng-A-T | 51  | chr9:51399050-51399150 |
| chr9 | 51502950 | 51503050 | 1065-Lng-C-T | 453 | chr9:51502950-51503050 |
| chr9 | 51566350 | 51566450 | 1223-Lng-A-T | 237 | chr9:51566350-51566450 |
| chr9 | 51607850 | 51607950 | 1004-Lng-A-T | 74  | chr9:51607850-51607950 |
| chr9 | 51671750 | 51671850 | 901-Lng-A-T  | 411 | chr9:51671750-51671850 |
| chr9 | 51704350 | 51704450 | 1223-Lng-C-T | 57  | chr9:51704350-51704450 |
| chr9 | 51766150 | 51766250 | 1188-Lng-A-T | 298 | chr9:51766150-51766250 |
| chr9 | 51779650 | 51779750 | 1072-Lng-A-T | 61  | chr9:51779650-51779750 |
| chr9 | 51785950 | 51786050 | 1188-Lng-A-T | 71  | chr9:51785950-51786050 |
| chr9 | 51790250 | 51790350 | 1004-Lng-A-T | 72  | chr9:51790250-51790350 |
| chr9 | 51838650 | 51838750 | 1004-Lng-A-T | 64  | chr9:51838650-51838750 |
| chr9 | 51865450 | 51865550 | 901-Lng-A-T  | 468 | chr9:51865450-51865550 |
| chr9 | 51869050 | 51869150 | 1100-Lng-A-T | 152 | chr9:51869050-51869150 |
| chr9 | 51871650 | 51871750 | 1223-Lng-B-T | 38  | chr9:51871650-51871750 |
| chr9 | 51877850 | 51877950 | 1223-Lng-C-T | 48  | chr9:51877850-51877950 |
| chr9 | 51926950 | 51927050 | 1065-Lng-A-T | 44  | chr9:51926950-51927050 |
| chr9 | 51956450 | 51956550 | 901-Lng-A-T  | 127 | chr9:51956450-51956550 |
| chr9 | 52087150 | 52087250 | 1090-Lng-A-T | 63  | chr9:52087150-52087250 |
| chr9 | 52111550 | 52111650 | 901-Lng-A-T  | 181 | chr9:52111550-52111650 |
| chr9 | 52128050 | 52128150 | 1223-Lng-D-T | 51  | chr9:52128050-52128150 |
| chr9 | 52282250 | 52282350 | 1072-Lng-A-T | 68  | chr9:52282250-52282350 |
| chr9 | 52297850 | 52297950 | 846-Lng-A-T  | 159 | chr9:52297850-52297950 |

**Table S2: SB Insertion regions**

|      |          |          |              |      |                        |
|------|----------|----------|--------------|------|------------------------|
| chr9 | 52303950 | 52304050 | 1065-Lng-A-T | 53   | chr9:52303950-52304050 |
| chr9 | 52677550 | 52677650 | 1152-Lng-A-T | 70   | chr9:52677550-52677650 |
| chr9 | 52929550 | 52929650 | 1090-Lng-A-T | 63   | chr9:52929550-52929650 |
| chr9 | 53003550 | 53003650 | 1152-Lng-A-T | 42   | chr9:53003550-53003650 |
| chr9 | 53003550 | 53003650 | 1223-Lng-B-T | 41   | chr9:53003550-53003650 |
| chr9 | 53112050 | 53112150 | 901-Lng-A-T  | 375  | chr9:53112050-53112150 |
| chr9 | 53145550 | 53145650 | 901-Lng-A-T  | 62   | chr9:53145550-53145650 |
| chr9 | 53174450 | 53174550 | 1065-Lng-C-T | 3161 | chr9:53174450-53174550 |
| chr9 | 53209950 | 53210050 | 1090-Lng-A-T | 81   | chr9:53209950-53210050 |
| chr9 | 53276950 | 53277050 | 846-Lng-A-T  | 80   | chr9:53276950-53277050 |
| chr9 | 53332250 | 53332350 | 901-Lng-D-T  | 43   | chr9:53332250-53332350 |
| chr9 | 53360650 | 53360750 | 1223-Lng-C-T | 60   | chr9:53360650-53360750 |
| chr9 | 53439650 | 53439750 | 846-Lng-A-T  | 88   | chr9:53439650-53439750 |
| chr9 | 53468350 | 53468450 | 1188-Lng-A-T | 140  | chr9:53468350-53468450 |
| chr9 | 53669450 | 53669550 | 1223-Lng-A-T | 58   | chr9:53669450-53669550 |
| chr9 | 53696150 | 53696250 | 1223-Lng-B-T | 122  | chr9:53696150-53696250 |
| chr9 | 53899250 | 53899350 | 1090-Lng-B-T | 124  | chr9:53899250-53899350 |
| chr9 | 54059550 | 54059650 | 1100-Lng-A-T | 123  | chr9:54059550-54059650 |
| chr9 | 54219050 | 54219150 | 901-Lng-A-T  | 93   | chr9:54219050-54219150 |
| chr9 | 54244950 | 54245050 | 1065-Lng-C-T | 67   | chr9:54244950-54245050 |
| chr9 | 54443650 | 54443750 | 1167-Lng-A-T | 53   | chr9:54443650-54443750 |
| chr9 | 54567750 | 54567850 | 1223-Lng-C-T | 47   | chr9:54567750-54567850 |
| chr9 | 54720850 | 54720950 | 1065-Lng-A-T | 43   | chr9:54720850-54720950 |
| chr9 | 54723750 | 54723850 | 1065-Lng-B-T | 59   | chr9:54723750-54723850 |
| chr9 | 54743250 | 54743350 | 1223-Lng-C-T | 105  | chr9:54743250-54743350 |
| chr9 | 55323250 | 55323350 | 901-Lng-A-T  | 454  | chr9:55323250-55323350 |
| chr9 | 55327950 | 55328050 | 1004-Lng-A-T | 63   | chr9:55327950-55328050 |
| chr9 | 55339650 | 55339750 | 901-Lng-C-T  | 103  | chr9:55339650-55339750 |
| chr9 | 56022750 | 56022850 | 1167-Lng-A-T | 54   | chr9:56022750-56022850 |
| chr9 | 56062850 | 56062950 | 1167-Lng-A-T | 88   | chr9:56062850-56062950 |
| chr9 | 56078050 | 56078150 | 1223-Lng-B-T | 47   | chr9:56078050-56078150 |
| chr9 | 56079550 | 56079650 | 1167-Lng-A-T | 55   | chr9:56079550-56079650 |
| chr9 | 56125050 | 56125150 | 901-Lng-C-T  | 170  | chr9:56125050-56125150 |
| chr9 | 56211550 | 56211650 | 1065-Lng-B-T | 148  | chr9:56211550-56211650 |
| chr9 | 56430150 | 56430250 | 1090-Lng-A-T | 45   | chr9:56430150-56430250 |
| chr9 | 56602350 | 56602450 | 1065-Lng-B-T | 270  | chr9:56602350-56602450 |
| chr9 | 56808150 | 56808250 | 1223-Lng-A-T | 101  | chr9:56808150-56808250 |
| chr9 | 56861950 | 56862050 | 1151-Lng-A-T | 76   | chr9:56861950-56862050 |
| chr9 | 56912850 | 56912950 | 1065-Lng-A-T | 79   | chr9:56912850-56912950 |
| chr9 | 56912950 | 56913050 | 1223-Lng-B-T | 308  | chr9:56912950-56913050 |
| chr9 | 56940250 | 56940350 | 1100-Lng-B-T | 75   | chr9:56940250-56940350 |
| chr9 | 56960650 | 56960750 | 1274-Lng-A-T | 190  | chr9:56960650-56960750 |
| chr9 | 56973550 | 56973650 | 901-Lng-A-T  | 103  | chr9:56973550-56973650 |
| chr9 | 56977650 | 56977750 | 901-Lng-D-T  | 222  | chr9:56977650-56977750 |
| chr9 | 57112650 | 57112750 | 1065-Lng-A-T | 70   | chr9:57112650-57112750 |
| chr9 | 57207450 | 57207550 | 1167-Lng-A-T | 81   | chr9:57207450-57207550 |

**Table S2: SB Insertion regions**

|      |          |          |              |     |                        |
|------|----------|----------|--------------|-----|------------------------|
| chr9 | 57279450 | 57279550 | 1274-Lng-A-T | 73  | chr9:57279450-57279550 |
| chr9 | 57411450 | 57411550 | 901-Lng-A-T  | 128 | chr9:57411450-57411550 |
| chr9 | 57574150 | 57574250 | 901-Lng-B-T  | 211 | chr9:57574150-57574250 |
| chr9 | 57610550 | 57610650 | 1152-Lng-A-T | 52  | chr9:57610550-57610650 |
| chr9 | 57610850 | 57610950 | 1100-Lng-A-T | 71  | chr9:57610850-57610950 |
| chr9 | 57636150 | 57636250 | 1151-Lng-A-T | 55  | chr9:57636150-57636250 |
| chr9 | 57659550 | 57659650 | 1100-Lng-A-T | 80  | chr9:57659550-57659650 |
| chr9 | 58086150 | 58086250 | 901-Lng-D-T  | 126 | chr9:58086150-58086250 |
| chr9 | 58274150 | 58274250 | 1100-Lng-A-T | 61  | chr9:58274150-58274250 |
| chr9 | 58376950 | 58377050 | 1065-Lng-B-T | 81  | chr9:58376950-58377050 |
| chr9 | 58464850 | 58464950 | 1167-Lng-A-T | 70  | chr9:58464850-58464950 |
| chr9 | 58467450 | 58467550 | 901-Lng-A-T  | 378 | chr9:58467450-58467550 |
| chr9 | 58475250 | 58475350 | 901-Lng-C-T  | 172 | chr9:58475250-58475350 |
| chr9 | 58508750 | 58508850 | 1065-Lng-C-T | 63  | chr9:58508750-58508850 |
| chr9 | 58767950 | 58768050 | 1004-Lng-A-T | 68  | chr9:58767950-58768050 |
| chr9 | 58828450 | 58828550 | 1004-Lng-A-T | 75  | chr9:58828450-58828550 |
| chr9 | 58843450 | 58843550 | 1065-Lng-B-T | 48  | chr9:58843450-58843550 |
| chr9 | 58848150 | 58848250 | 1223-Lng-D-T | 43  | chr9:58848150-58848250 |
| chr9 | 58949150 | 58949250 | 1223-Lng-D-T | 50  | chr9:58949150-58949250 |
| chr9 | 59134850 | 59134950 | 1065-Lng-C-T | 106 | chr9:59134850-59134950 |
| chr9 | 59242650 | 59242750 | 1274-Lng-A-T | 187 | chr9:59242650-59242750 |
| chr9 | 59247950 | 59248050 | 1151-Lng-A-T | 74  | chr9:59247950-59248050 |
| chr9 | 59281150 | 59281250 | 1167-Lng-A-T | 145 | chr9:59281150-59281250 |
| chr9 | 59284750 | 59284850 | 1188-Lng-A-T | 48  | chr9:59284750-59284850 |
| chr9 | 59287550 | 59287650 | 1274-Lng-A-T | 52  | chr9:59287550-59287650 |
| chr9 | 59306450 | 59306550 | 1274-Lng-A-T | 62  | chr9:59306450-59306550 |
| chr9 | 59310750 | 59310850 | 1152-Lng-A-T | 48  | chr9:59310750-59310850 |
| chr9 | 59311550 | 59311650 | 1167-Lng-A-T | 58  | chr9:59311550-59311650 |
| chr9 | 59465650 | 59465750 | 1274-Lng-A-T | 116 | chr9:59465650-59465750 |
| chr9 | 59526250 | 59526350 | 1152-Lng-A-T | 181 | chr9:59526250-59526350 |
| chr9 | 59538350 | 59538450 | 1274-Lng-A-T | 72  | chr9:59538350-59538450 |
| chr9 | 59581550 | 59581650 | 1223-Lng-A-T | 159 | chr9:59581550-59581650 |
| chr9 | 59760950 | 59761050 | 1223-Lng-D-T | 63  | chr9:59760950-59761050 |
| chr9 | 59771750 | 59771850 | 1274-Lng-A-T | 57  | chr9:59771750-59771850 |
| chr9 | 60014150 | 60014250 | 1100-Lng-A-T | 107 | chr9:60014150-60014250 |
| chr9 | 60058350 | 60058450 | 1151-Lng-A-T | 62  | chr9:60058350-60058450 |
| chr9 | 60106350 | 60106450 | 1151-Lng-A-T | 72  | chr9:60106350-60106450 |
| chr9 | 60153650 | 60153750 | 1274-Lng-A-T | 49  | chr9:60153650-60153750 |
| chr9 | 60177050 | 60177150 | 901-Lng-B-T  | 77  | chr9:60177050-60177150 |
| chr9 | 60217050 | 60217150 | 901-Lng-C-T  | 51  | chr9:60217050-60217150 |
| chr9 | 60222850 | 60222950 | 1100-Lng-A-T | 110 | chr9:60222850-60222950 |
| chr9 | 60247350 | 60247450 | 1065-Lng-B-T | 45  | chr9:60247350-60247450 |
| chr9 | 60260650 | 60260750 | 1065-Lng-A-T | 131 | chr9:60260650-60260750 |
| chr9 | 60342550 | 60342650 | 901-Lng-C-T  | 36  | chr9:60342550-60342650 |
| chr9 | 60344450 | 60344550 | 1188-Lng-A-T | 35  | chr9:60344450-60344550 |
| chr9 | 60695950 | 60696050 | 1152-Lng-A-T | 71  | chr9:60695950-60696050 |

**Table S2: SB Insertion regions**

|      |          |          |              |      |                        |
|------|----------|----------|--------------|------|------------------------|
| chr9 | 60827750 | 60827850 | 1274-Lng-A-T | 65   | chr9:60827750-60827850 |
| chr9 | 61032050 | 61032150 | 1223-Lng-B-T | 36   | chr9:61032050-61032150 |
| chr9 | 61118250 | 61118350 | 1065-Lng-C-T | 187  | chr9:61118250-61118350 |
| chr9 | 61124050 | 61124150 | 1223-Lng-D-T | 41   | chr9:61124050-61124150 |
| chr9 | 61256650 | 61256750 | 1152-Lng-A-T | 111  | chr9:61256650-61256750 |
| chr9 | 61933750 | 61933850 | 1223-Lng-D-T | 50   | chr9:61933750-61933850 |
| chr9 | 62070650 | 62070750 | 1151-Lng-A-T | 147  | chr9:62070650-62070750 |
| chr9 | 62175150 | 62175250 | 1151-Lng-A-T | 674  | chr9:62175150-62175250 |
| chr9 | 62231350 | 62231450 | 1188-Lng-A-T | 50   | chr9:62231350-62231450 |
| chr9 | 62304950 | 62305050 | 1100-Lng-A-T | 109  | chr9:62304950-62305050 |
| chr9 | 62394750 | 62394850 | 1151-Lng-A-T | 105  | chr9:62394750-62394850 |
| chr9 | 62641850 | 62641950 | 1090-Lng-A-T | 73   | chr9:62641850-62641950 |
| chr9 | 62646050 | 62646150 | 901-Lng-D-T  | 53   | chr9:62646050-62646150 |
| chr9 | 62737350 | 62737450 | 1152-Lng-A-T | 48   | chr9:62737350-62737450 |
| chr9 | 62740850 | 62740950 | 1274-Lng-A-T | 154  | chr9:62740850-62740950 |
| chr9 | 62747050 | 62747150 | 1065-Lng-B-T | 50   | chr9:62747050-62747150 |
| chr9 | 62756850 | 62756950 | 1065-Lng-A-T | 36   | chr9:62756850-62756950 |
| chr9 | 62785650 | 62785750 | 1100-Lng-A-T | 71   | chr9:62785650-62785750 |
| chr9 | 62808550 | 62808650 | 1152-Lng-A-T | 61   | chr9:62808550-62808650 |
| chr9 | 62817250 | 62817350 | 901-Lng-C-T  | 209  | chr9:62817250-62817350 |
| chr9 | 62917350 | 62917450 | 1223-Lng-C-T | 47   | chr9:62917350-62917450 |
| chr9 | 62967550 | 62967650 | 1100-Lng-B-T | 262  | chr9:62967550-62967650 |
| chr9 | 62974850 | 62974950 | 901-Lng-C-T  | 57   | chr9:62974850-62974950 |
| chr9 | 63210150 | 63210250 | 901-Lng-D-T  | 112  | chr9:63210150-63210250 |
| chr9 | 63214150 | 63214250 | 1151-Lng-A-T | 55   | chr9:63214150-63214250 |
| chr9 | 63305950 | 63306050 | 1065-Lng-A-T | 46   | chr9:63305950-63306050 |
| chr9 | 63373550 | 63373650 | 1065-Lng-A-T | 43   | chr9:63373550-63373650 |
| chr9 | 63388250 | 63388350 | 1151-Lng-A-T | 320  | chr9:63388250-63388350 |
| chr9 | 63575150 | 63575250 | 1100-Lng-A-T | 70   | chr9:63575150-63575250 |
| chr9 | 63634550 | 63634650 | 1223-Lng-B-T | 36   | chr9:63634550-63634650 |
| chr9 | 63796650 | 63796750 | 1188-Lng-A-T | 36   | chr9:63796650-63796750 |
| chr9 | 64029150 | 64029250 | 1152-Lng-A-T | 54   | chr9:64029150-64029250 |
| chr9 | 64106450 | 64106550 | 901-Lng-C-T  | 28   | chr9:64106450-64106550 |
| chr9 | 64195250 | 64195350 | 1223-Lng-B-T | 297  | chr9:64195250-64195350 |
| chr9 | 64212450 | 64212550 | 1065-Lng-B-T | 51   | chr9:64212450-64212550 |
| chr9 | 64383650 | 64383750 | 1072-Lng-A-T | 49   | chr9:64383650-64383750 |
| chr9 | 64550550 | 64550650 | 1274-Lng-A-T | 182  | chr9:64550550-64550650 |
| chr9 | 64672450 | 64672550 | 901-Lng-A-T  | 118  | chr9:64672450-64672550 |
| chr9 | 64708550 | 64708650 | 1065-Lng-C-T | 1801 | chr9:64708550-64708650 |
| chr9 | 64732350 | 64732450 | 1223-Lng-A-T | 97   | chr9:64732350-64732450 |
| chr9 | 64848350 | 64848450 | 1065-Lng-C-T | 75   | chr9:64848350-64848450 |
| chr9 | 64906450 | 64906550 | 1072-Lng-A-T | 97   | chr9:64906450-64906550 |
| chr9 | 65152750 | 65152850 | 1072-Lng-A-T | 48   | chr9:65152750-65152850 |
| chr9 | 65195950 | 65196050 | 1151-Lng-A-T | 113  | chr9:65195950-65196050 |
| chr9 | 65315950 | 65316050 | 901-Lng-D-T  | 76   | chr9:65315950-65316050 |
| chr9 | 65430750 | 65430850 | 1223-Lng-B-T | 41   | chr9:65430750-65430850 |



**Table S2: SB Insertion regions**

|      |          |          |              |      |                        |
|------|----------|----------|--------------|------|------------------------|
| chr9 | 65578350 | 65578450 | 1100-Lng-B-T | 2646 | chr9:65578350-65578450 |
| chr9 | 65608150 | 65608250 | 1004-Lng-A-T | 67   | chr9:65608150-65608250 |
| chr9 | 65640750 | 65640850 | 1090-Lng-A-T | 86   | chr9:65640750-65640850 |
| chr9 | 65641950 | 65642050 | 1188-Lng-A-T | 201  | chr9:65641950-65642050 |
| chr9 | 65680850 | 65680950 | 901-Lng-C-T  | 302  | chr9:65680850-65680950 |
| chr9 | 65691650 | 65691750 | 1188-Lng-A-T | 652  | chr9:65691650-65691750 |
| chr9 | 65802150 | 65802250 | 1274-Lng-A-T | 86   | chr9:65802150-65802250 |
| chr9 | 65963350 | 65963450 | 1152-Lng-A-T | 68   | chr9:65963350-65963450 |
| chr9 | 66070850 | 66070950 | 1065-Lng-A-T | 43   | chr9:66070850-66070950 |
| chr9 | 66212550 | 66212650 | 1223-Lng-A-T | 120  | chr9:66212550-66212650 |
| chr9 | 66327450 | 66327550 | 1100-Lng-A-T | 62   | chr9:66327450-66327550 |
| chr9 | 66336650 | 66336750 | 1152-Lng-A-T | 112  | chr9:66336650-66336750 |
| chr9 | 66392150 | 66392250 | 1100-Lng-A-T | 240  | chr9:66392150-66392250 |
| chr9 | 66461150 | 66461250 | 1090-Lng-A-T | 75   | chr9:66461150-66461250 |
| chr9 | 66475250 | 66475350 | 1274-Lng-A-T | 91   | chr9:66475250-66475350 |
| chr9 | 66714350 | 66714450 | 901-Lng-C-T  | 378  | chr9:66714350-66714450 |
| chr9 | 66883550 | 66883650 | 1065-Lng-A-T | 35   | chr9:66883550-66883650 |
| chr9 | 67183750 | 67183850 | 1072-Lng-A-T | 124  | chr9:67183750-67183850 |
| chr9 | 67221950 | 67222050 | 1065-Lng-A-T | 155  | chr9:67221950-67222050 |
| chr9 | 67279950 | 67280050 | 901-Lng-D-T  | 253  | chr9:67279950-67280050 |
| chr9 | 67385550 | 67385650 | 901-Lng-C-T  | 59   | chr9:67385550-67385650 |
| chr9 | 67434950 | 67435050 | 1151-Lng-A-T | 59   | chr9:67434950-67435050 |
| chr9 | 67776150 | 67776250 | 846-Lng-A-T  | 89   | chr9:67776150-67776250 |
| chr9 | 67816350 | 67816450 | 1188-Lng-A-T | 328  | chr9:67816350-67816450 |
| chr9 | 68847750 | 68847850 | 1004-Lng-A-T | 139  | chr9:68847750-68847850 |
| chr9 | 68854550 | 68854650 | 901-Lng-C-T  | 46   | chr9:68854550-68854650 |
| chr9 | 69014150 | 69014250 | 1100-Lng-A-T | 110  | chr9:69014150-69014250 |
| chr9 | 69029650 | 69029750 | 1100-Lng-B-T | 53   | chr9:69029650-69029750 |
| chr9 | 69166750 | 69166850 | 1188-Lng-A-T | 61   | chr9:69166750-69166850 |
| chr9 | 69215250 | 69215350 | 1167-Lng-A-T | 67   | chr9:69215250-69215350 |
| chr9 | 69234150 | 69234250 | 901-Lng-C-T  | 55   | chr9:69234150-69234250 |
| chr9 | 69264550 | 69264650 | 1274-Lng-A-T | 136  | chr9:69264550-69264650 |
| chr9 | 69288650 | 69288750 | 1100-Lng-A-T | 57   | chr9:69288650-69288750 |
| chr9 | 69297350 | 69297450 | 1065-Lng-C-T | 139  | chr9:69297350-69297450 |
| chr9 | 69623650 | 69623750 | 901-Lng-C-T  | 38   | chr9:69623650-69623750 |
| chr9 | 70109450 | 70109550 | 1152-Lng-A-T | 151  | chr9:70109450-70109550 |
| chr9 | 70134550 | 70134650 | 901-Lng-C-T  | 37   | chr9:70134550-70134650 |
| chr9 | 70164550 | 70164650 | 1274-Lng-A-T | 92   | chr9:70164550-70164650 |
| chr9 | 70187250 | 70187350 | 1100-Lng-A-T | 376  | chr9:70187250-70187350 |
| chr9 | 70264950 | 70265050 | 1065-Lng-C-T | 72   | chr9:70264950-70265050 |
| chr9 | 70277650 | 70277750 | 1223-Lng-A-T | 237  | chr9:70277650-70277750 |
| chr9 | 70299250 | 70299350 | 1223-Lng-B-T | 36   | chr9:70299250-70299350 |
| chr9 | 70305850 | 70305950 | 1274-Lng-A-T | 137  | chr9:70305850-70305950 |
| chr9 | 70340350 | 70340450 | 1223-Lng-B-T | 76   | chr9:70340350-70340450 |
| chr9 | 70347150 | 70347250 | 1274-Lng-A-T | 91   | chr9:70347150-70347250 |
| chr9 | 70391450 | 70391550 | 1065-Lng-A-T | 91   | chr9:70391450-70391550 |

**Table S2: SB Insertion regions**

|      |          |          |              |     |                        |
|------|----------|----------|--------------|-----|------------------------|
| chr9 | 70397450 | 70397550 | 901-Lng-C-T  | 98  | chr9:70397450-70397550 |
| chr9 | 70409850 | 70409950 | 1065-Lng-C-T | 141 | chr9:70409850-70409950 |
| chr9 | 70430250 | 70430350 | 1167-Lng-A-T | 80  | chr9:70430250-70430350 |
| chr9 | 70432350 | 70432450 | 1223-Lng-A-T | 171 | chr9:70432350-70432450 |
| chr9 | 70442450 | 70442550 | 1223-Lng-B-T | 82  | chr9:70442450-70442550 |
| chr9 | 70448350 | 70448450 | 901-Lng-C-T  | 642 | chr9:70448350-70448450 |
| chr9 | 70483150 | 70483250 | 1090-Lng-A-T | 84  | chr9:70483150-70483250 |
| chr9 | 70490050 | 70490150 | 1065-Lng-C-T | 65  | chr9:70490050-70490150 |
| chr9 | 70570250 | 70570350 | 1065-Lng-A-T | 52  | chr9:70570250-70570350 |
| chr9 | 70581950 | 70582050 | 1223-Lng-B-T | 41  | chr9:70581950-70582050 |
| chr9 | 70617550 | 70617650 | 1065-Lng-A-T | 68  | chr9:70617550-70617650 |
| chr9 | 70624550 | 70624650 | 901-Lng-B-T  | 200 | chr9:70624550-70624650 |
| chr9 | 70628350 | 70628450 | 1090-Lng-A-T | 106 | chr9:70628350-70628450 |
| chr9 | 70793850 | 70793950 | 1065-Lng-C-T | 89  | chr9:70793850-70793950 |
| chr9 | 70838550 | 70838650 | 1065-Lng-A-T | 57  | chr9:70838550-70838650 |
| chr9 | 71022250 | 71022350 | 1223-Lng-A-T | 123 | chr9:71022250-71022350 |
| chr9 | 71226150 | 71226250 | 901-Lng-C-T  | 174 | chr9:71226150-71226250 |
| chr9 | 71332350 | 71332450 | 1274-Lng-A-T | 165 | chr9:71332350-71332450 |
| chr9 | 71405550 | 71405650 | 1188-Lng-A-T | 35  | chr9:71405550-71405650 |
| chr9 | 71517250 | 71517350 | 1223-Lng-B-T | 45  | chr9:71517250-71517350 |
| chr9 | 71592350 | 71592450 | 1090-Lng-B-T | 117 | chr9:71592350-71592450 |
| chr9 | 71691350 | 71691450 | 1090-Lng-A-T | 101 | chr9:71691350-71691450 |
| chr9 | 71723350 | 71723450 | 901-Lng-A-T  | 61  | chr9:71723350-71723450 |
| chr9 | 71797850 | 71797950 | 1072-Lng-A-T | 65  | chr9:71797850-71797950 |
| chr9 | 71872750 | 71872850 | 1167-Lng-A-T | 51  | chr9:71872750-71872850 |
| chr9 | 71877250 | 71877350 | 901-Lng-C-T  | 42  | chr9:71877250-71877350 |
| chr9 | 71880550 | 71880650 | 1004-Lng-A-T | 78  | chr9:71880550-71880650 |
| chr9 | 71911150 | 71911250 | 846-Lng-A-T  | 80  | chr9:71911150-71911250 |
| chr9 | 71912750 | 71912850 | 1223-Lng-A-T | 69  | chr9:71912750-71912850 |
| chr9 | 71921350 | 71921450 | 901-Lng-C-T  | 32  | chr9:71921350-71921450 |
| chr9 | 71924450 | 71924550 | 1100-Lng-A-T | 57  | chr9:71924450-71924550 |
| chr9 | 71935750 | 71935850 | 1100-Lng-A-T | 126 | chr9:71935750-71935850 |
| chr9 | 71941550 | 71941650 | 1151-Lng-A-T | 202 | chr9:71941550-71941650 |
| chr9 | 72148550 | 72148650 | 1151-Lng-A-T | 240 | chr9:72148550-72148650 |
| chr9 | 72210550 | 72210650 | 1223-Lng-A-T | 126 | chr9:72210550-72210650 |
| chr9 | 72312650 | 72312750 | 1151-Lng-A-T | 194 | chr9:72312650-72312750 |
| chr9 | 72405650 | 72405750 | 1072-Lng-A-T | 229 | chr9:72405650-72405750 |
| chr9 | 72610750 | 72610850 | 1188-Lng-A-T | 187 | chr9:72610750-72610850 |
| chr9 | 72754050 | 72754150 | 901-Lng-C-T  | 147 | chr9:72754050-72754150 |
| chr9 | 72795550 | 72795650 | 901-Lng-B-T  | 169 | chr9:72795550-72795650 |
| chr9 | 72858750 | 72858850 | 901-Lng-C-T  | 53  | chr9:72858750-72858850 |
| chr9 | 72870750 | 72870850 | 1004-Lng-A-T | 82  | chr9:72870750-72870850 |
| chr9 | 72889750 | 72889850 | 1152-Lng-A-T | 191 | chr9:72889750-72889850 |
| chr9 | 72898750 | 72898850 | 1274-Lng-A-T | 163 | chr9:72898750-72898850 |
| chr9 | 73065850 | 73065950 | 1090-Lng-A-T | 76  | chr9:73065850-73065950 |
| chr9 | 73089950 | 73090050 | 1090-Lng-A-T | 159 | chr9:73089950-73090050 |

**Table S2: SB Insertion regions**

|      |          |          |              |      |                        |
|------|----------|----------|--------------|------|------------------------|
| chr9 | 73360350 | 73360450 | 1223-Lng-C-T | 58   | chr9:73360350-73360450 |
| chr9 | 73368950 | 73369050 | 1090-Lng-B-T | 290  | chr9:73368950-73369050 |
| chr9 | 73631550 | 73631650 | 1152-Lng-A-T | 69   | chr9:73631550-73631650 |
| chr9 | 73671250 | 73671350 | 1065-Lng-B-T | 72   | chr9:73671250-73671350 |
| chr9 | 73684450 | 73684550 | 1223-Lng-C-T | 61   | chr9:73684450-73684550 |
| chr9 | 73926550 | 73926650 | 901-Lng-C-T  | 34   | chr9:73926550-73926650 |
| chr9 | 73938550 | 73938650 | 1065-Lng-A-T | 83   | chr9:73938550-73938650 |
| chr9 | 73941250 | 73941350 | 1072-Lng-A-T | 60   | chr9:73941250-73941350 |
| chr9 | 73981750 | 73981850 | 1090-Lng-A-T | 65   | chr9:73981750-73981850 |
| chr9 | 73994150 | 73994250 | 1090-Lng-A-T | 49   | chr9:73994150-73994250 |
| chr9 | 74279250 | 74279350 | 1072-Lng-A-T | 95   | chr9:74279250-74279350 |
| chr9 | 74285350 | 74285450 | 1065-Lng-B-T | 69   | chr9:74285350-74285450 |
| chr9 | 74805250 | 74805350 | 1004-Lng-A-T | 85   | chr9:74805250-74805350 |
| chr9 | 74807450 | 74807550 | 1100-Lng-A-T | 58   | chr9:74807450-74807550 |
| chr9 | 74827950 | 74828050 | 846-Lng-A-T  | 99   | chr9:74827950-74828050 |
| chr9 | 74878150 | 74878250 | 1223-Lng-C-T | 64   | chr9:74878150-74878250 |
| chr9 | 74963550 | 74963650 | 1004-Lng-A-T | 52   | chr9:74963550-74963650 |
| chr9 | 75150950 | 75151050 | 901-Lng-B-T  | 149  | chr9:75150950-75151050 |
| chr9 | 75157050 | 75157150 | 901-Lng-D-T  | 323  | chr9:75157050-75157150 |
| chr9 | 75185350 | 75185450 | 901-Lng-A-T  | 54   | chr9:75185350-75185450 |
| chr9 | 75209350 | 75209450 | 1065-Lng-A-T | 68   | chr9:75209350-75209450 |
| chr9 | 75373650 | 75373750 | 1151-Lng-A-T | 165  | chr9:75373650-75373750 |
| chr9 | 75627050 | 75627150 | 1065-Lng-C-T | 1517 | chr9:75627050-75627150 |
| chr9 | 75635950 | 75636050 | 1065-Lng-A-T | 122  | chr9:75635950-75636050 |
| chr9 | 75648650 | 75648750 | 901-Lng-B-T  | 175  | chr9:75648650-75648750 |
| chr9 | 75673850 | 75673950 | 901-Lng-B-T  | 95   | chr9:75673850-75673950 |
| chr9 | 75682750 | 75682850 | 1223-Lng-C-T | 68   | chr9:75682750-75682850 |
| chr9 | 75719650 | 75719750 | 1167-Lng-A-T | 46   | chr9:75719650-75719750 |
| chr9 | 75734850 | 75734950 | 1065-Lng-A-T | 121  | chr9:75734850-75734950 |
| chr9 | 75812350 | 75812450 | 1100-Lng-A-T | 60   | chr9:75812350-75812450 |
| chr9 | 75881450 | 75881550 | 1223-Lng-A-T | 241  | chr9:75881450-75881550 |
| chr9 | 75891050 | 75891150 | 1065-Lng-A-T | 37   | chr9:75891050-75891150 |
| chr9 | 75959850 | 75959950 | 1223-Lng-A-T | 274  | chr9:75959850-75959950 |
| chr9 | 76377250 | 76377350 | 1090-Lng-A-T | 61   | chr9:76377250-76377350 |
| chr9 | 76582350 | 76582450 | 1090-Lng-B-T | 62   | chr9:76582350-76582450 |
| chr9 | 76649450 | 76649550 | 1065-Lng-C-T | 102  | chr9:76649450-76649550 |
| chr9 | 76829650 | 76829750 | 901-Lng-B-T  | 96   | chr9:76829650-76829750 |
| chr9 | 76881050 | 76881150 | 901-Lng-D-T  | 605  | chr9:76881050-76881150 |
| chr9 | 76883050 | 76883150 | 1090-Lng-A-T | 988  | chr9:76883050-76883150 |
| chr9 | 76904150 | 76904250 | 1090-Lng-A-T | 117  | chr9:76904150-76904250 |
| chr9 | 77102650 | 77102750 | 1151-Lng-A-T | 57   | chr9:77102650-77102750 |
| chr9 | 77139250 | 77139350 | 846-Lng-A-T  | 139  | chr9:77139250-77139350 |
| chr9 | 77270850 | 77270950 | 901-Lng-D-T  | 224  | chr9:77270850-77270950 |
| chr9 | 77291350 | 77291450 | 1004-Lng-A-T | 58   | chr9:77291350-77291450 |
| chr9 | 77569650 | 77569750 | 846-Lng-A-T  | 46   | chr9:77569650-77569750 |
| chr9 | 77640650 | 77640750 | 846-Lng-A-T  | 1013 | chr9:77640650-77640750 |

**Table S2: SB Insertion regions**

|      |          |          |              |      |                        |
|------|----------|----------|--------------|------|------------------------|
| chr9 | 77803350 | 77803450 | 1090-Lng-A-T | 61   | chr9:77803350-77803450 |
| chr9 | 77828050 | 77828150 | 1065-Lng-B-T | 107  | chr9:77828050-77828150 |
| chr9 | 77911550 | 77911650 | 1167-Lng-A-T | 87   | chr9:77911550-77911650 |
| chr9 | 77938150 | 77938250 | 1223-Lng-A-T | 443  | chr9:77938150-77938250 |
| chr9 | 77985350 | 77985450 | 901-Lng-B-T  | 230  | chr9:77985350-77985450 |
| chr9 | 78004750 | 78004850 | 1100-Lng-A-T | 60   | chr9:78004750-78004850 |
| chr9 | 78011650 | 78011750 | 1188-Lng-A-T | 159  | chr9:78011650-78011750 |
| chr9 | 78019050 | 78019150 | 1151-Lng-A-T | 5522 | chr9:78019050-78019150 |
| chr9 | 78054750 | 78054850 | 1274-Lng-A-T | 50   | chr9:78054750-78054850 |
| chr9 | 78158250 | 78158350 | 1152-Lng-A-T | 37   | chr9:78158250-78158350 |
| chr9 | 78222350 | 78222450 | 1167-Lng-A-T | 99   | chr9:78222350-78222450 |
| chr9 | 78319850 | 78319950 | 901-Lng-A-T  | 106  | chr9:78319850-78319950 |
| chr9 | 78589850 | 78589950 | 1065-Lng-A-T | 40   | chr9:78589850-78589950 |
| chr9 | 78628450 | 78628550 | 1090-Lng-A-T | 60   | chr9:78628450-78628550 |
| chr9 | 78836550 | 78836650 | 1223-Lng-C-T | 62   | chr9:78836550-78836650 |
| chr9 | 78843550 | 78843650 | 1090-Lng-B-T | 516  | chr9:78843550-78843650 |
| chr9 | 78974350 | 78974450 | 901-Lng-B-T  | 86   | chr9:78974350-78974450 |
| chr9 | 79176450 | 79176550 | 1065-Lng-A-T | 138  | chr9:79176450-79176550 |
| chr9 | 79400250 | 79400350 | 901-Lng-C-T  | 46   | chr9:79400250-79400350 |
| chr9 | 79464550 | 79464650 | 1065-Lng-B-T | 98   | chr9:79464550-79464650 |
| chr9 | 79464550 | 79464650 | 901-Lng-B-T  | 76   | chr9:79464550-79464650 |
| chr9 | 79509350 | 79509450 | 1274-Lng-A-T | 109  | chr9:79509350-79509450 |
| chr9 | 79621350 | 79621450 | 1151-Lng-A-T | 9633 | chr9:79621350-79621450 |
| chr9 | 79625850 | 79625950 | 1188-Lng-A-T | 348  | chr9:79625850-79625950 |
| chr9 | 79802150 | 79802250 | 1100-Lng-A-T | 57   | chr9:79802150-79802250 |
| chr9 | 79847250 | 79847350 | 1100-Lng-A-T | 195  | chr9:79847250-79847350 |
| chr9 | 79940950 | 79941050 | 1167-Lng-A-T | 101  | chr9:79940950-79941050 |
| chr9 | 79969150 | 79969250 | 901-Lng-B-T  | 106  | chr9:79969150-79969250 |
| chr9 | 79980550 | 79980650 | 1090-Lng-B-T | 411  | chr9:79980550-79980650 |
| chr9 | 80025650 | 80025750 | 1090-Lng-A-T | 47   | chr9:80025650-80025750 |
| chr9 | 80048450 | 80048550 | 1151-Lng-A-T | 145  | chr9:80048450-80048550 |
| chr9 | 80240750 | 80240850 | 1188-Lng-A-T | 35   | chr9:80240750-80240850 |
| chr9 | 80348650 | 80348750 | 901-Lng-C-T  | 42   | chr9:80348650-80348750 |
| chr9 | 80388250 | 80388350 | 1223-Lng-A-T | 101  | chr9:80388250-80388350 |
| chr9 | 80427150 | 80427250 | 1223-Lng-A-T | 523  | chr9:80427150-80427250 |
| chr9 | 80446850 | 80446950 | 901-Lng-B-T  | 316  | chr9:80446850-80446950 |
| chr9 | 80536450 | 80536550 | 846-Lng-A-T  | 106  | chr9:80536450-80536550 |
| chr9 | 80587450 | 80587550 | 901-Lng-B-T  | 168  | chr9:80587450-80587550 |
| chr9 | 80939850 | 80939950 | 901-Lng-A-T  | 82   | chr9:80939850-80939950 |
| chr9 | 81031450 | 81031550 | 1065-Lng-C-T | 90   | chr9:81031450-81031550 |
| chr9 | 81074050 | 81074150 | 1090-Lng-A-T | 652  | chr9:81074050-81074150 |
| chr9 | 81207450 | 81207550 | 1004-Lng-A-T | 50   | chr9:81207450-81207550 |
| chr9 | 81268350 | 81268450 | 1004-Lng-A-T | 63   | chr9:81268350-81268450 |
| chr9 | 81316950 | 81317050 | 1004-Lng-A-T | 70   | chr9:81316950-81317050 |
| chr9 | 81361350 | 81361450 | 846-Lng-A-T  | 69   | chr9:81361350-81361450 |
| chr9 | 81478850 | 81478950 | 1065-Lng-C-T | 972  | chr9:81478850-81478950 |

**Table S2: SB Insertion regions**

|      |          |          |              |      |                        |
|------|----------|----------|--------------|------|------------------------|
| chr9 | 81648150 | 81648250 | 901-Lng-D-T  | 486  | chr9:81648150-81648250 |
| chr9 | 81655350 | 81655450 | 901-Lng-D-T  | 127  | chr9:81655350-81655450 |
| chr9 | 81679050 | 81679150 | 1223-Lng-B-T | 35   | chr9:81679050-81679150 |
| chr9 | 81753950 | 81754050 | 901-Lng-C-T  | 76   | chr9:81753950-81754050 |
| chr9 | 81775350 | 81775450 | 901-Lng-B-T  | 193  | chr9:81775350-81775450 |
| chr9 | 81905250 | 81905350 | 1152-Lng-A-T | 55   | chr9:81905250-81905350 |
| chr9 | 81928950 | 81929050 | 1065-Lng-B-T | 57   | chr9:81928950-81929050 |
| chr9 | 82302050 | 82302150 | 1100-Lng-A-T | 100  | chr9:82302050-82302150 |
| chr9 | 82325450 | 82325550 | 1100-Lng-A-T | 98   | chr9:82325450-82325550 |
| chr9 | 82734050 | 82734150 | 1151-Lng-A-T | 58   | chr9:82734050-82734150 |
| chr9 | 82761750 | 82761850 | 1151-Lng-A-T | 360  | chr9:82761750-82761850 |
| chr9 | 82774150 | 82774250 | 1151-Lng-A-T | 7600 | chr9:82774150-82774250 |
| chr9 | 82775750 | 82775850 | 1151-Lng-A-T | 145  | chr9:82775750-82775850 |
| chr9 | 82800850 | 82800950 | 1151-Lng-A-T | 459  | chr9:82800850-82800950 |
| chr9 | 82836850 | 82836950 | 901-Lng-B-T  | 129  | chr9:82836850-82836950 |
| chr9 | 82841050 | 82841150 | 1152-Lng-A-T | 41   | chr9:82841050-82841150 |
| chr9 | 83123750 | 83123850 | 1152-Lng-A-T | 125  | chr9:83123750-83123850 |
| chr9 | 83191250 | 83191350 | 901-Lng-B-T  | 171  | chr9:83191250-83191350 |
| chr9 | 83597350 | 83597450 | 1090-Lng-B-T | 71   | chr9:83597350-83597450 |
| chr9 | 83608450 | 83608550 | 1274-Lng-A-T | 82   | chr9:83608450-83608550 |
| chr9 | 84066950 | 84067050 | 1004-Lng-A-T | 56   | chr9:84066950-84067050 |
| chr9 | 84223550 | 84223650 | 1072-Lng-A-T | 62   | chr9:84223550-84223650 |
| chr9 | 84574150 | 84574250 | 1065-Lng-A-T | 79   | chr9:84574150-84574250 |
| chr9 | 84676550 | 84676650 | 1167-Lng-A-T | 96   | chr9:84676550-84676650 |
| chr9 | 84738450 | 84738550 | 1223-Lng-A-T | 174  | chr9:84738450-84738550 |
| chr9 | 84792250 | 84792350 | 901-Lng-A-T  | 63   | chr9:84792250-84792350 |
| chr9 | 84806450 | 84806550 | 901-Lng-B-T  | 90   | chr9:84806450-84806550 |
| chr9 | 84953350 | 84953450 | 1223-Lng-A-T | 242  | chr9:84953350-84953450 |
| chr9 | 85017650 | 85017750 | 1274-Lng-A-T | 57   | chr9:85017650-85017750 |
| chr9 | 85382250 | 85382350 | 901-Lng-A-T  | 375  | chr9:85382250-85382350 |
| chr9 | 86253150 | 86253250 | 1223-Lng-B-T | 40   | chr9:86253150-86253250 |
| chr9 | 86283450 | 86283550 | 1004-Lng-A-T | 117  | chr9:86283450-86283550 |
| chr9 | 86451450 | 86451550 | 1090-Lng-A-T | 96   | chr9:86451450-86451550 |
| chr9 | 86470950 | 86471050 | 1274-Lng-A-T | 136  | chr9:86470950-86471050 |
| chr9 | 86512550 | 86512650 | 1274-Lng-A-T | 69   | chr9:86512550-86512650 |
| chr9 | 86520050 | 86520150 | 1152-Lng-A-T | 47   | chr9:86520050-86520150 |
| chr9 | 86529950 | 86530050 | 1065-Lng-B-T | 58   | chr9:86529950-86530050 |
| chr9 | 86544750 | 86544850 | 1188-Lng-A-T | 154  | chr9:86544750-86544850 |
| chr9 | 86897150 | 86897250 | 1065-Lng-B-T | 80   | chr9:86897150-86897250 |
| chr9 | 86941650 | 86941750 | 846-Lng-A-T  | 69   | chr9:86941650-86941750 |
| chr9 | 86959250 | 86959350 | 901-Lng-B-T  | 87   | chr9:86959250-86959350 |
| chr9 | 87119650 | 87119750 | 901-Lng-D-T  | 95   | chr9:87119650-87119750 |
| chr9 | 87262450 | 87262550 | 1151-Lng-A-T | 164  | chr9:87262450-87262550 |
| chr9 | 87359850 | 87359950 | 1065-Lng-A-T | 39   | chr9:87359850-87359950 |
| chr9 | 87468450 | 87468550 | 901-Lng-B-T  | 136  | chr9:87468450-87468550 |
| chr9 | 87544250 | 87544350 | 1152-Lng-A-T | 56   | chr9:87544250-87544350 |

**Table S2: SB Insertion regions**

|      |          |          |              |       |                        |
|------|----------|----------|--------------|-------|------------------------|
| chr9 | 87835550 | 87835650 | 1065-Lng-B-T | 46    | chr9:87835550-87835650 |
| chr9 | 87886950 | 87887050 | 1065-Lng-B-T | 68    | chr9:87886950-87887050 |
| chr9 | 88137050 | 88137150 | 1167-Lng-A-T | 52    | chr9:88137050-88137150 |
| chr9 | 88275250 | 88275350 | 1090-Lng-A-T | 162   | chr9:88275250-88275350 |
| chr9 | 88304150 | 88304250 | 1090-Lng-A-T | 53    | chr9:88304150-88304250 |
| chr9 | 88335150 | 88335250 | 1223-Lng-B-T | 264   | chr9:88335150-88335250 |
| chr9 | 88364550 | 88364650 | 901-Lng-B-T  | 179   | chr9:88364550-88364650 |
| chr9 | 88397450 | 88397550 | 1188-Lng-A-T | 11999 | chr9:88397450-88397550 |
| chr9 | 88453450 | 88453550 | 1090-Lng-A-T | 76    | chr9:88453450-88453550 |
| chr9 | 88491150 | 88491250 | 1223-Lng-B-T | 38    | chr9:88491150-88491250 |
| chr9 | 88740450 | 88740550 | 1100-Lng-A-T | 96    | chr9:88740450-88740550 |
| chr9 | 89130250 | 89130350 | 1152-Lng-A-T | 408   | chr9:89130250-89130350 |
| chr9 | 89164150 | 89164250 | 1100-Lng-A-T | 66    | chr9:89164150-89164250 |
| chr9 | 89467550 | 89467650 | 1223-Lng-A-T | 196   | chr9:89467550-89467650 |
| chr9 | 89482150 | 89482250 | 901-Lng-D-T  | 197   | chr9:89482150-89482250 |
| chr9 | 89547650 | 89547750 | 901-Lng-D-T  | 155   | chr9:89547650-89547750 |
| chr9 | 89576650 | 89576750 | 901-Lng-C-T  | 115   | chr9:89576650-89576750 |
| chr9 | 89852150 | 89852250 | 901-Lng-C-T  | 393   | chr9:89852150-89852250 |
| chr9 | 89920750 | 89920850 | 1274-Lng-A-T | 55    | chr9:89920750-89920850 |
| chr9 | 89973650 | 89973750 | 1100-Lng-A-T | 76    | chr9:89973650-89973750 |
| chr9 | 90003750 | 90003850 | 846-Lng-A-T  | 92    | chr9:90003750-90003850 |
| chr9 | 90124750 | 90124850 | 1223-Lng-B-T | 115   | chr9:90124750-90124850 |
| chr9 | 90139550 | 90139650 | 1100-Lng-A-T | 52    | chr9:90139550-90139650 |
| chr9 | 90166850 | 90166950 | 1004-Lng-A-T | 57    | chr9:90166850-90166950 |
| chr9 | 90230650 | 90230750 | 901-Lng-C-T  | 28    | chr9:90230650-90230750 |
| chr9 | 90323950 | 90324050 | 1188-Lng-A-T | 192   | chr9:90323950-90324050 |
| chr9 | 90885450 | 90885550 | 1004-Lng-A-T | 671   | chr9:90885450-90885550 |
| chr9 | 91343050 | 91343150 | 901-Lng-B-T  | 46    | chr9:91343050-91343150 |
| chr9 | 91387950 | 91388050 | 1274-Lng-A-T | 65    | chr9:91387950-91388050 |
| chr9 | 91432350 | 91432450 | 1151-Lng-A-T | 54    | chr9:91432350-91432450 |
| chr9 | 91496850 | 91496950 | 901-Lng-A-T  | 71    | chr9:91496850-91496950 |
| chr9 | 91589050 | 91589150 | 901-Lng-B-T  | 208   | chr9:91589050-91589150 |
| chr9 | 91739150 | 91739250 | 901-Lng-D-T  | 138   | chr9:91739150-91739250 |
| chr9 | 91799250 | 91799350 | 1065-Lng-B-T | 185   | chr9:91799250-91799350 |
| chr9 | 92083450 | 92083550 | 901-Lng-A-T  | 318   | chr9:92083450-92083550 |
| chr9 | 92274550 | 92274650 | 1072-Lng-A-T | 160   | chr9:92274550-92274650 |
| chr9 | 92419950 | 92420050 | 901-Lng-A-T  | 57    | chr9:92419950-92420050 |
| chr9 | 92568050 | 92568150 | 901-Lng-C-T  | 56    | chr9:92568050-92568150 |
| chr9 | 92577450 | 92577550 | 1065-Lng-A-T | 96    | chr9:92577450-92577550 |
| chr9 | 92723850 | 92723950 | 1090-Lng-A-T | 56    | chr9:92723850-92723950 |
| chr9 | 92736950 | 92737050 | 901-Lng-C-T  | 273   | chr9:92736950-92737050 |
| chr9 | 93176750 | 93176850 | 1090-Lng-A-T | 61    | chr9:93176750-93176850 |
| chr9 | 93199650 | 93199750 | 1152-Lng-A-T | 240   | chr9:93199650-93199750 |
| chr9 | 93249250 | 93249350 | 1004-Lng-A-T | 73    | chr9:93249250-93249350 |
| chr9 | 93282950 | 93283050 | 901-Lng-A-T  | 59    | chr9:93282950-93283050 |
| chr9 | 93387950 | 93388050 | 1223-Lng-A-T | 325   | chr9:93387950-93388050 |

**Table S2: SB Insertion regions**

|      |          |          |              |     |                        |
|------|----------|----------|--------------|-----|------------------------|
| chr9 | 93524950 | 93525050 | 901-Lng-C-T  | 29  | chr9:93524950-93525050 |
| chr9 | 93646350 | 93646450 | 1223-Lng-A-T | 199 | chr9:93646350-93646450 |
| chr9 | 94191150 | 94191250 | 901-Lng-C-T  | 49  | chr9:94191150-94191250 |
| chr9 | 94382450 | 94382550 | 1152-Lng-A-T | 37  | chr9:94382450-94382550 |
| chr9 | 94432050 | 94432150 | 901-Lng-B-T  | 117 | chr9:94432050-94432150 |
| chr9 | 94483150 | 94483250 | 1090-Lng-A-T | 54  | chr9:94483150-94483250 |
| chr9 | 94588050 | 94588150 | 1274-Lng-A-T | 138 | chr9:94588050-94588150 |
| chr9 | 95383150 | 95383250 | 1223-Lng-D-T | 50  | chr9:95383150-95383250 |
| chr9 | 95397750 | 95397850 | 1065-Lng-A-T | 41  | chr9:95397750-95397850 |
| chr9 | 95398850 | 95398950 | 1004-Lng-A-T | 70  | chr9:95398850-95398950 |
| chr9 | 95410550 | 95410650 | 1223-Lng-D-T | 67  | chr9:95410550-95410650 |
| chr9 | 95856850 | 95856950 | 1100-Lng-A-T | 138 | chr9:95856850-95856950 |
| chr9 | 96059950 | 96060050 | 1151-Lng-A-T | 192 | chr9:96059950-96060050 |
| chr9 | 96131550 | 96131650 | 1090-Lng-A-T | 65  | chr9:96131550-96131650 |
| chr9 | 96189450 | 96189550 | 1065-Lng-B-T | 48  | chr9:96189450-96189550 |
| chr9 | 96192350 | 96192450 | 901-Lng-D-T  | 312 | chr9:96192350-96192450 |
| chr9 | 96242350 | 96242450 | 1065-Lng-B-T | 45  | chr9:96242350-96242450 |
| chr9 | 96262350 | 96262450 | 1223-Lng-B-T | 130 | chr9:96262350-96262450 |
| chr9 | 96376950 | 96377050 | 1152-Lng-A-T | 45  | chr9:96376950-96377050 |
| chr9 | 96440450 | 96440550 | 1090-Lng-A-T | 226 | chr9:96440450-96440550 |
| chr9 | 96486450 | 96486550 | 1090-Lng-A-T | 73  | chr9:96486450-96486550 |
| chr9 | 96486650 | 96486750 | 1223-Lng-A-T | 183 | chr9:96486650-96486750 |
| chr9 | 96516950 | 96517050 | 1151-Lng-A-T | 67  | chr9:96516950-96517050 |
| chr9 | 96530250 | 96530350 | 1100-Lng-A-T | 60  | chr9:96530250-96530350 |
| chr9 | 96582950 | 96583050 | 1223-Lng-B-T | 60  | chr9:96582950-96583050 |
| chr9 | 96583850 | 96583950 | 1004-Lng-A-T | 640 | chr9:96583850-96583950 |
| chr9 | 96722550 | 96722650 | 1065-Lng-C-T | 78  | chr9:96722550-96722650 |
| chr9 | 96761950 | 96762050 | 1223-Lng-C-T | 146 | chr9:96761950-96762050 |
| chr9 | 96853350 | 96853450 | 1223-Lng-C-T | 47  | chr9:96853350-96853450 |
| chr9 | 96983350 | 96983450 | 1274-Lng-A-T | 114 | chr9:96983350-96983450 |
| chr9 | 96995150 | 96995250 | 1274-Lng-A-T | 83  | chr9:96995150-96995250 |
| chr9 | 97004150 | 97004250 | 1152-Lng-A-T | 142 | chr9:97004150-97004250 |
| chr9 | 97009550 | 97009650 | 1188-Lng-A-T | 146 | chr9:97009550-97009650 |
| chr9 | 97055550 | 97055650 | 1188-Lng-A-T | 518 | chr9:97055550-97055650 |
| chr9 | 97078150 | 97078250 | 1065-Lng-A-T | 42  | chr9:97078150-97078250 |
| chr9 | 97362350 | 97362450 | 1223-Lng-B-T | 70  | chr9:97362350-97362450 |
| chr9 | 97396650 | 97396750 | 1090-Lng-A-T | 664 | chr9:97396650-97396750 |
| chr9 | 97517750 | 97517850 | 1065-Lng-A-T | 36  | chr9:97517750-97517850 |
| chr9 | 97634650 | 97634750 | 901-Lng-C-T  | 47  | chr9:97634650-97634750 |
| chr9 | 97686850 | 97686950 | 1223-Lng-B-T | 172 | chr9:97686850-97686950 |
| chr9 | 98149550 | 98149650 | 1152-Lng-A-T | 64  | chr9:98149550-98149650 |
| chr9 | 98294950 | 98295050 | 901-Lng-C-T  | 29  | chr9:98294950-98295050 |
| chr9 | 98912350 | 98912450 | 846-Lng-A-T  | 106 | chr9:98912350-98912450 |
| chr9 | 98937150 | 98937250 | 901-Lng-C-T  | 62  | chr9:98937150-98937250 |
| chr9 | 98958250 | 98958350 | 901-Lng-B-T  | 105 | chr9:98958250-98958350 |
| chr9 | 98969550 | 98969650 | 1004-Lng-A-T | 78  | chr9:98969550-98969650 |

**Table S2: SB Insertion regions**

|      |           |           |              |     |                          |
|------|-----------|-----------|--------------|-----|--------------------------|
| chr9 | 98969650  | 98969750  | 901-Lng-B-T  | 147 | chr9:98969650-98969750   |
| chr9 | 98978250  | 98978350  | 1167-Lng-A-T | 114 | chr9:98978250-98978350   |
| chr9 | 98998550  | 98998650  | 1090-Lng-A-T | 264 | chr9:98998550-98998650   |
| chr9 | 99148350  | 99148450  | 901-Lng-A-T  | 50  | chr9:99148350-99148450   |
| chr9 | 99149150  | 99149250  | 1100-Lng-B-T | 66  | chr9:99149150-99149250   |
| chr9 | 99153750  | 99153850  | 1151-Lng-A-T | 181 | chr9:99153750-99153850   |
| chr9 | 99185250  | 99185350  | 1004-Lng-A-T | 55  | chr9:99185250-99185350   |
| chr9 | 99338050  | 99338150  | 1065-Lng-B-T | 47  | chr9:99338050-99338150   |
| chr9 | 99396950  | 99397050  | 901-Lng-B-T  | 173 | chr9:99396950-99397050   |
| chr9 | 99419150  | 99419250  | 1274-Lng-A-T | 159 | chr9:99419150-99419250   |
| chr9 | 99442750  | 99442850  | 901-Lng-C-T  | 42  | chr9:99442750-99442850   |
| chr9 | 99456550  | 99456650  | 1223-Lng-C-T | 101 | chr9:99456550-99456650   |
| chr9 | 99509450  | 99509550  | 1223-Lng-C-T | 49  | chr9:99509450-99509550   |
| chr9 | 99566450  | 99566550  | 1223-Lng-C-T | 62  | chr9:99566450-99566550   |
| chr9 | 99876550  | 99876650  | 1167-Lng-A-T | 127 | chr9:99876550-99876650   |
| chr9 | 100399150 | 100399250 | 1274-Lng-A-T | 57  | chr9:100399150-100399250 |
| chr9 | 100426950 | 100427050 | 1274-Lng-A-T | 69  | chr9:100426950-100427050 |
| chr9 | 100432850 | 100432950 | 1100-Lng-A-T | 104 | chr9:100432850-100432950 |
| chr9 | 100471950 | 100472050 | 901-Lng-C-T  | 42  | chr9:100471950-100472050 |
| chr9 | 100517250 | 100517350 | 1223-Lng-C-T | 48  | chr9:100517250-100517350 |
| chr9 | 100588150 | 100588250 | 1004-Lng-A-T | 84  | chr9:100588150-100588250 |
| chr9 | 100598350 | 100598450 | 1065-Lng-A-T | 114 | chr9:100598350-100598450 |
| chr9 | 100641950 | 100642050 | 1090-Lng-A-T | 64  | chr9:100641950-100642050 |
| chr9 | 100650250 | 100650350 | 1004-Lng-A-T | 59  | chr9:100650250-100650350 |
| chr9 | 100652350 | 100652450 | 1223-Lng-B-T | 83  | chr9:100652350-100652450 |
| chr9 | 100676450 | 100676550 | 1072-Lng-A-T | 127 | chr9:100676450-100676550 |
| chr9 | 100769350 | 100769450 | 901-Lng-D-T  | 355 | chr9:100769350-100769450 |
| chr9 | 100819250 | 100819350 | 1065-Lng-A-T | 73  | chr9:100819250-100819350 |
| chr9 | 100899250 | 100899350 | 1065-Lng-A-T | 40  | chr9:100899250-100899350 |
| chr9 | 100968050 | 100968150 | 1072-Lng-A-T | 115 | chr9:100968050-100968150 |
| chr9 | 100999250 | 100999350 | 1151-Lng-A-T | 366 | chr9:100999250-100999350 |
| chr9 | 101060550 | 101060650 | 1274-Lng-A-T | 76  | chr9:101060550-101060650 |
| chr9 | 101084650 | 101084750 | 1065-Lng-A-T | 44  | chr9:101084650-101084750 |
| chr9 | 101142050 | 101142150 | 901-Lng-B-T  | 121 | chr9:101142050-101142150 |
| chr9 | 101142950 | 101143050 | 901-Lng-B-T  | 200 | chr9:101142950-101143050 |
| chr9 | 101401450 | 101401550 | 1223-Lng-A-T | 51  | chr9:101401450-101401550 |
| chr9 | 101502350 | 101502450 | 901-Lng-B-T  | 144 | chr9:101502350-101502450 |
| chr9 | 101901050 | 101901150 | 901-Lng-B-T  | 167 | chr9:101901050-101901150 |
| chr9 | 101979250 | 101979350 | 1152-Lng-A-T | 48  | chr9:101979250-101979350 |
| chr9 | 102675550 | 102675650 | 1065-Lng-B-T | 68  | chr9:102675550-102675650 |
| chr9 | 102760450 | 102760550 | 1065-Lng-C-T | 64  | chr9:102760450-102760550 |
| chr9 | 102774450 | 102774550 | 1223-Lng-D-T | 49  | chr9:102774450-102774550 |
| chr9 | 102905350 | 102905450 | 901-Lng-D-T  | 199 | chr9:102905350-102905450 |
| chr9 | 103097950 | 103098050 | 1167-Lng-A-T | 74  | chr9:103097950-103098050 |
| chr9 | 103343250 | 103343350 | 1090-Lng-A-T | 388 | chr9:103343250-103343350 |
| chr9 | 103351650 | 103351750 | 1223-Lng-A-T | 147 | chr9:103351650-103351750 |



**Table S2: SB Insertion regions**

|      |           |           |              |       |                          |
|------|-----------|-----------|--------------|-------|--------------------------|
| chr9 | 103500350 | 103500450 | 901-Lng-C-T  | 53    | chr9:103500350-103500450 |
| chr9 | 103625350 | 103625450 | 1065-Lng-C-T | 84    | chr9:103625350-103625450 |
| chr9 | 103959850 | 103959950 | 1151-Lng-A-T | 113   | chr9:103959850-103959950 |
| chr9 | 103964550 | 103964650 | 1004-Lng-A-T | 52    | chr9:103964550-103964650 |
| chr9 | 104053150 | 104053250 | 1090-Lng-A-T | 109   | chr9:104053150-104053250 |
| chr9 | 104094750 | 104094850 | 1223-Lng-A-T | 149   | chr9:104094750-104094850 |
| chr9 | 104142850 | 104142950 | 1167-Lng-A-T | 92    | chr9:104142850-104142950 |
| chr9 | 104180350 | 104180450 | 1072-Lng-A-T | 187   | chr9:104180350-104180450 |
| chr9 | 104323650 | 104323750 | 846-Lng-A-T  | 181   | chr9:104323650-104323750 |
| chr9 | 104366950 | 104367050 | 1100-Lng-B-T | 11617 | chr9:104366950-104367050 |
| chr9 | 104444750 | 104444850 | 1065-Lng-B-T | 111   | chr9:104444750-104444850 |
| chr9 | 104642350 | 104642450 | 1274-Lng-A-T | 62    | chr9:104642350-104642450 |
| chr9 | 104706550 | 104706650 | 1004-Lng-A-T | 51    | chr9:104706550-104706650 |
| chr9 | 104727350 | 104727450 | 1100-Lng-B-T | 99    | chr9:104727350-104727450 |
| chr9 | 104865250 | 104865350 | 1072-Lng-A-T | 71    | chr9:104865250-104865350 |
| chr9 | 105062650 | 105062750 | 1065-Lng-A-T | 180   | chr9:105062650-105062750 |
| chr9 | 105285450 | 105285550 | 901-Lng-B-T  | 222   | chr9:105285450-105285550 |
| chr9 | 105423250 | 105423350 | 1072-Lng-A-T | 65    | chr9:105423250-105423350 |
| chr9 | 105555650 | 105555750 | 901-Lng-C-T  | 32    | chr9:105555650-105555750 |
| chr9 | 105825750 | 105825850 | 1167-Lng-A-T | 45    | chr9:105825750-105825850 |
| chr9 | 106074950 | 106075050 | 1152-Lng-A-T | 69    | chr9:106074950-106075050 |
| chr9 | 106109950 | 106110050 | 1151-Lng-A-T | 173   | chr9:106109950-106110050 |
| chr9 | 106158350 | 106158450 | 1072-Lng-A-T | 180   | chr9:106158350-106158450 |
| chr9 | 106158950 | 106159050 | 1223-Lng-A-T | 1451  | chr9:106158950-106159050 |
| chr9 | 106293550 | 106293650 | 1090-Lng-A-T | 79    | chr9:106293550-106293650 |
| chr9 | 106504050 | 106504150 | 1152-Lng-A-T | 40    | chr9:106504050-106504150 |
| chr9 | 106638650 | 106638750 | 901-Lng-C-T  | 63    | chr9:106638650-106638750 |
| chr9 | 106655750 | 106655850 | 1100-Lng-A-T | 64    | chr9:106655750-106655850 |
| chr9 | 106673550 | 106673650 | 1090-Lng-A-T | 854   | chr9:106673550-106673650 |
| chr9 | 106936450 | 106936550 | 901-Lng-C-T  | 45    | chr9:106936450-106936550 |
| chr9 | 106955950 | 106956050 | 1065-Lng-B-T | 66    | chr9:106955950-106956050 |
| chr9 | 107073350 | 107073450 | 1065-Lng-B-T | 60    | chr9:107073350-107073450 |
| chr9 | 107170350 | 107170450 | 1188-Lng-A-T | 57    | chr9:107170350-107170450 |
| chr9 | 107350850 | 107350950 | 901-Lng-C-T  | 40    | chr9:107350850-107350950 |
| chr9 | 107423150 | 107423250 | 1090-Lng-B-T | 239   | chr9:107423150-107423250 |
| chr9 | 107668050 | 107668150 | 1065-Lng-A-T | 503   | chr9:107668050-107668150 |
| chr9 | 107670050 | 107670150 | 1072-Lng-A-T | 118   | chr9:107670050-107670150 |
| chr9 | 107708150 | 107708250 | 1152-Lng-A-T | 64    | chr9:107708150-107708250 |
| chr9 | 107758450 | 107758550 | 901-Lng-C-T  | 120   | chr9:107758450-107758550 |
| chr9 | 107765550 | 107765650 | 1223-Lng-D-T | 53    | chr9:107765550-107765650 |
| chr9 | 107988650 | 107988750 | 1188-Lng-A-T | 174   | chr9:107988650-107988750 |
| chr9 | 108137050 | 108137150 | 1004-Lng-A-T | 49    | chr9:108137050-108137150 |
| chr9 | 108148950 | 108149050 | 1223-Lng-B-T | 264   | chr9:108148950-108149050 |
| chr9 | 108149350 | 108149450 | 1004-Lng-A-T | 69    | chr9:108149350-108149450 |
| chr9 | 108162250 | 108162350 | 1274-Lng-A-T | 58    | chr9:108162250-108162350 |
| chr9 | 108205450 | 108205550 | 1090-Lng-A-T | 63    | chr9:108205450-108205550 |

**Table S2: SB Insertion regions**

|      |           |           |              |      |                          |
|------|-----------|-----------|--------------|------|--------------------------|
| chr9 | 108215050 | 108215150 | 901-Lng-A-T  | 79   | chr9:108215050-108215150 |
| chr9 | 108226550 | 108226650 | 1065-Lng-B-T | 67   | chr9:108226550-108226650 |
| chr9 | 108283550 | 108283650 | 901-Lng-A-T  | 62   | chr9:108283550-108283650 |
| chr9 | 108430350 | 108430450 | 901-Lng-B-T  | 113  | chr9:108430350-108430450 |
| chr9 | 108598550 | 108598650 | 1167-Lng-A-T | 46   | chr9:108598550-108598650 |
| chr9 | 108613950 | 108614050 | 1167-Lng-A-T | 50   | chr9:108613950-108614050 |
| chr9 | 108624250 | 108624350 | 1072-Lng-A-T | 58   | chr9:108624250-108624350 |
| chr9 | 108632650 | 108632750 | 901-Lng-C-T  | 79   | chr9:108632650-108632750 |
| chr9 | 108634950 | 108635050 | 1274-Lng-A-T | 147  | chr9:108634950-108635050 |
| chr9 | 108694650 | 108694750 | 901-Lng-C-T  | 40   | chr9:108694650-108694750 |
| chr9 | 108694750 | 108694850 | 1223-Lng-A-T | 60   | chr9:108694750-108694850 |
| chr9 | 108700150 | 108700250 | 901-Lng-C-T  | 47   | chr9:108700150-108700250 |
| chr9 | 108701950 | 108702050 | 1274-Lng-A-T | 134  | chr9:108701950-108702050 |
| chr9 | 108705750 | 108705850 | 846-Lng-A-T  | 53   | chr9:108705750-108705850 |
| chr9 | 108822650 | 108822750 | 1065-Lng-A-T | 45   | chr9:108822650-108822750 |
| chr9 | 108920750 | 108920850 | 1100-Lng-A-T | 71   | chr9:108920750-108920850 |
| chr9 | 109347750 | 109347850 | 1188-Lng-A-T | 72   | chr9:109347750-109347850 |
| chr9 | 109901950 | 109902050 | 1065-Lng-C-T | 67   | chr9:109901950-109902050 |
| chr9 | 109935750 | 109935850 | 1223-Lng-A-T | 171  | chr9:109935750-109935850 |
| chr9 | 109957050 | 109957150 | 1100-Lng-A-T | 2184 | chr9:109957050-109957150 |
| chr9 | 110102550 | 110102650 | 1100-Lng-B-T | 61   | chr9:110102550-110102650 |
| chr9 | 110141950 | 110142050 | 1223-Lng-B-T | 62   | chr9:110141950-110142050 |
| chr9 | 110181850 | 110181950 | 846-Lng-A-T  | 61   | chr9:110181850-110181950 |
| chr9 | 110355650 | 110355750 | 1065-Lng-A-T | 87   | chr9:110355650-110355750 |
| chr9 | 110413350 | 110413450 | 1065-Lng-B-T | 288  | chr9:110413350-110413450 |
| chr9 | 110413450 | 110413550 | 1065-Lng-A-T | 96   | chr9:110413450-110413550 |
| chr9 | 110439150 | 110439250 | 1152-Lng-A-T | 60   | chr9:110439150-110439250 |
| chr9 | 110449350 | 110449450 | 901-Lng-A-T  | 653  | chr9:110449350-110449450 |
| chr9 | 110471650 | 110471750 | 1274-Lng-A-T | 63   | chr9:110471650-110471750 |
| chr9 | 110486850 | 110486950 | 1152-Lng-A-T | 53   | chr9:110486850-110486950 |
| chr9 | 110487450 | 110487550 | 1100-Lng-A-T | 93   | chr9:110487450-110487550 |
| chr9 | 110491050 | 110491150 | 1100-Lng-A-T | 122  | chr9:110491050-110491150 |
| chr9 | 110492050 | 110492150 | 901-Lng-A-T  | 57   | chr9:110492050-110492150 |
| chr9 | 110510050 | 110510150 | 1274-Lng-A-T | 161  | chr9:110510050-110510150 |
| chr9 | 110520250 | 110520350 | 1188-Lng-A-T | 149  | chr9:110520250-110520350 |
| chr9 | 110525350 | 110525450 | 1065-Lng-B-T | 75   | chr9:110525350-110525450 |
| chr9 | 110574550 | 110574650 | 1100-Lng-A-T | 166  | chr9:110574550-110574650 |
| chr9 | 110744750 | 110744850 | 1004-Lng-A-T | 65   | chr9:110744750-110744850 |
| chr9 | 110945650 | 110945750 | 901-Lng-D-T  | 141  | chr9:110945650-110945750 |
| chr9 | 111146350 | 111146450 | 1065-Lng-B-T | 52   | chr9:111146350-111146450 |
| chr9 | 111573250 | 111573350 | 1223-Lng-B-T | 53   | chr9:111573250-111573350 |
| chr9 | 112263550 | 112263650 | 1065-Lng-B-T | 39   | chr9:112263550-112263650 |
| chr9 | 112338550 | 112338650 | 1065-Lng-A-T | 45   | chr9:112338550-112338650 |
| chr9 | 112398350 | 112398450 | 1223-Lng-B-T | 41   | chr9:112398350-112398450 |
| chr9 | 112503250 | 112503350 | 1065-Lng-A-T | 116  | chr9:112503250-112503350 |
| chr9 | 112520550 | 112520650 | 846-Lng-A-T  | 130  | chr9:112520550-112520650 |

**Table S2: SB Insertion regions**

|      |           |           |              |     |                          |
|------|-----------|-----------|--------------|-----|--------------------------|
| chr9 | 112599650 | 112599750 | 901-Lng-B-T  | 94  | chr9:112599650-112599750 |
| chr9 | 112932450 | 112932550 | 1274-Lng-A-T | 73  | chr9:112932450-112932550 |
| chr9 | 112933250 | 112933350 | 1223-Lng-B-T | 44  | chr9:112933250-112933350 |
| chr9 | 113081850 | 113081950 | 1065-Lng-C-T | 63  | chr9:113081850-113081950 |
| chr9 | 113088350 | 113088450 | 1072-Lng-A-T | 59  | chr9:113088350-113088450 |
| chr9 | 113566650 | 113566750 | 1065-Lng-A-T | 57  | chr9:113566650-113566750 |
| chr9 | 113567650 | 113567750 | 846-Lng-A-T  | 65  | chr9:113567650-113567750 |
| chr9 | 113597250 | 113597350 | 1065-Lng-B-T | 41  | chr9:113597250-113597350 |
| chr9 | 113601150 | 113601250 | 901-Lng-D-T  | 231 | chr9:113601150-113601250 |
| chr9 | 113603150 | 113603250 | 1072-Lng-A-T | 100 | chr9:113603150-113603250 |
| chr9 | 113603150 | 113603250 | 1065-Lng-C-T | 115 | chr9:113603150-113603250 |
| chr9 | 113616450 | 113616550 | 901-Lng-D-T  | 451 | chr9:113616450-113616550 |
| chr9 | 113717450 | 113717550 | 901-Lng-B-T  | 79  | chr9:113717450-113717550 |
| chr9 | 113796450 | 113796550 | 846-Lng-A-T  | 120 | chr9:113796450-113796550 |
| chr9 | 113823650 | 113823750 | 1065-Lng-B-T | 56  | chr9:113823650-113823750 |
| chr9 | 113850550 | 113850650 | 1072-Lng-A-T | 59  | chr9:113850550-113850650 |
| chr9 | 113864050 | 113864150 | 1274-Lng-A-T | 156 | chr9:113864050-113864150 |
| chr9 | 113876250 | 113876350 | 1065-Lng-B-T | 80  | chr9:113876250-113876350 |
| chr9 | 114293450 | 114293550 | 1090-Lng-B-T | 352 | chr9:114293450-114293550 |
| chr9 | 114504950 | 114505050 | 1090-Lng-A-T | 78  | chr9:114504950-114505050 |
| chr9 | 114535350 | 114535450 | 1223-Lng-C-T | 44  | chr9:114535350-114535450 |
| chr9 | 114577850 | 114577950 | 1065-Lng-B-T | 58  | chr9:114577850-114577950 |
| chr9 | 114617150 | 114617250 | 901-Lng-A-T  | 75  | chr9:114617150-114617250 |
| chr9 | 114642950 | 114643050 | 1223-Lng-B-T | 117 | chr9:114642950-114643050 |
| chr9 | 114704350 | 114704450 | 1100-Lng-A-T | 90  | chr9:114704350-114704450 |
| chr9 | 114739950 | 114740050 | 1188-Lng-A-T | 68  | chr9:114739950-114740050 |
| chr9 | 114857550 | 114857650 | 1090-Lng-A-T | 53  | chr9:114857550-114857650 |
| chr9 | 114913350 | 114913450 | 901-Lng-D-T  | 231 | chr9:114913350-114913450 |
| chr9 | 115097750 | 115097850 | 1004-Lng-A-T | 179 | chr9:115097750-115097850 |
| chr9 | 115117250 | 115117350 | 1274-Lng-A-T | 83  | chr9:115117250-115117350 |
| chr9 | 115156450 | 115156550 | 901-Lng-A-T  | 53  | chr9:115156450-115156550 |
| chr9 | 115185550 | 115185650 | 846-Lng-A-T  | 104 | chr9:115185550-115185650 |
| chr9 | 115211550 | 115211650 | 1065-Lng-A-T | 131 | chr9:115211550-115211650 |
| chr9 | 115422350 | 115422450 | 1065-Lng-B-T | 102 | chr9:115422350-115422450 |
| chr9 | 115626450 | 115626550 | 1090-Lng-A-T | 72  | chr9:115626450-115626550 |
| chr9 | 115662050 | 115662150 | 901-Lng-C-T  | 88  | chr9:115662050-115662150 |
| chr9 | 115924150 | 115924250 | 1090-Lng-A-T | 49  | chr9:115924150-115924250 |
| chr9 | 115990050 | 115990150 | 1072-Lng-A-T | 64  | chr9:115990050-115990150 |
| chr9 | 115993850 | 115993950 | 1167-Lng-A-T | 47  | chr9:115993850-115993950 |
| chr9 | 116034350 | 116034450 | 1004-Lng-A-T | 105 | chr9:116034350-116034450 |
| chr9 | 116076750 | 116076850 | 1100-Lng-A-T | 78  | chr9:116076750-116076850 |
| chr9 | 116127150 | 116127250 | 1090-Lng-A-T | 107 | chr9:116127150-116127250 |
| chr9 | 116152250 | 116152350 | 1065-Lng-C-T | 74  | chr9:116152250-116152350 |
| chr9 | 116591550 | 116591650 | 1065-Lng-B-T | 59  | chr9:116591550-116591650 |
| chr9 | 116656450 | 116656550 | 1188-Lng-A-T | 59  | chr9:116656450-116656550 |
| chr9 | 116807450 | 116807550 | 1223-Lng-D-T | 52  | chr9:116807450-116807550 |

**Table S2: SB Insertion regions**

|      |           |           |              |     |                          |
|------|-----------|-----------|--------------|-----|--------------------------|
| chr9 | 116813250 | 116813350 | 901-Lng-D-T  | 43  | chr9:116813250-116813350 |
| chr9 | 116862550 | 116862650 | 901-Lng-C-T  | 36  | chr9:116862550-116862650 |
| chr9 | 116954050 | 116954150 | 1223-Lng-C-T | 74  | chr9:116954050-116954150 |
| chr9 | 116969750 | 116969850 | 1274-Lng-A-T | 152 | chr9:116969750-116969850 |
| chr9 | 116978650 | 116978750 | 1151-Lng-A-T | 60  | chr9:116978650-116978750 |
| chr9 | 117126650 | 117126750 | 1065-Lng-C-T | 69  | chr9:117126650-117126750 |
| chr9 | 117153950 | 117154050 | 901-Lng-A-T  | 132 | chr9:117153950-117154050 |
| chr9 | 117444950 | 117445050 | 1090-Lng-A-T | 121 | chr9:117444950-117445050 |
| chr9 | 117465150 | 117465250 | 1065-Lng-B-T | 59  | chr9:117465150-117465250 |
| chr9 | 117534550 | 117534650 | 1152-Lng-A-T | 130 | chr9:117534550-117534650 |
| chr9 | 117908650 | 117908750 | 1223-Lng-D-T | 52  | chr9:117908650-117908750 |
| chr9 | 117952850 | 117952950 | 1151-Lng-A-T | 58  | chr9:117952850-117952950 |
| chr9 | 118408450 | 118408550 | 1152-Lng-A-T | 126 | chr9:118408450-118408550 |
| chr9 | 118430550 | 118430650 | 1100-Lng-A-T | 274 | chr9:118430550-118430650 |
| chr9 | 118448550 | 118448650 | 1274-Lng-A-T | 242 | chr9:118448550-118448650 |
| chr9 | 118479650 | 118479750 | 846-Lng-A-T  | 187 | chr9:118479650-118479750 |
| chr9 | 118482850 | 118482950 | 1004-Lng-A-T | 52  | chr9:118482850-118482950 |
| chr9 | 118512350 | 118512450 | 1152-Lng-A-T | 99  | chr9:118512350-118512450 |
| chr9 | 118530350 | 118530450 | 1065-Lng-A-T | 48  | chr9:118530350-118530450 |
| chr9 | 118574150 | 118574250 | 1100-Lng-A-T | 85  | chr9:118574150-118574250 |
| chr9 | 118575850 | 118575950 | 1152-Lng-A-T | 73  | chr9:118575850-118575950 |
| chr9 | 118660850 | 118660950 | 1188-Lng-A-T | 37  | chr9:118660850-118660950 |
| chr9 | 118682450 | 118682550 | 1188-Lng-A-T | 40  | chr9:118682450-118682550 |
| chr9 | 118730450 | 118730550 | 1152-Lng-A-T | 56  | chr9:118730450-118730550 |
| chr9 | 118737950 | 118738050 | 1167-Lng-A-T | 124 | chr9:118737950-118738050 |
| chr9 | 118832450 | 118832550 | 1065-Lng-B-T | 65  | chr9:118832450-118832550 |
| chr9 | 118847150 | 118847250 | 901-Lng-A-T  | 125 | chr9:118847150-118847250 |
| chr9 | 118890350 | 118890450 | 1274-Lng-A-T | 63  | chr9:118890350-118890450 |
| chr9 | 118971650 | 118971750 | 901-Lng-B-T  | 42  | chr9:118971650-118971750 |
| chr9 | 119136450 | 119136550 | 901-Lng-C-T  | 43  | chr9:119136450-119136550 |
| chr9 | 119165950 | 119166050 | 1274-Lng-A-T | 63  | chr9:119165950-119166050 |
| chr9 | 119384850 | 119384950 | 901-Lng-D-T  | 117 | chr9:119384850-119384950 |
| chr9 | 120104150 | 120104250 | 1004-Lng-A-T | 84  | chr9:120104150-120104250 |
| chr9 | 120191850 | 120191950 | 846-Lng-A-T  | 45  | chr9:120191850-120191950 |
| chr9 | 120329450 | 120329550 | 901-Lng-A-T  | 115 | chr9:120329450-120329550 |
| chr9 | 120774750 | 120774850 | 1004-Lng-A-T | 101 | chr9:120774750-120774850 |
| chr9 | 120795750 | 120795850 | 1004-Lng-A-T | 79  | chr9:120795750-120795850 |
| chr9 | 120853950 | 120854050 | 1152-Lng-A-T | 312 | chr9:120853950-120854050 |
| chr9 | 120856750 | 120856850 | 1151-Lng-A-T | 88  | chr9:120856750-120856850 |
| chr9 | 120918650 | 120918750 | 1223-Lng-D-T | 44  | chr9:120918650-120918750 |
| chr9 | 121165550 | 121165650 | 1072-Lng-A-T | 56  | chr9:121165550-121165650 |
| chr9 | 121218750 | 121218850 | 1223-Lng-C-T | 744 | chr9:121218750-121218850 |
| chr9 | 121244850 | 121244950 | 1223-Lng-A-T | 71  | chr9:121244850-121244950 |
| chr9 | 121265050 | 121265150 | 1100-Lng-A-T | 143 | chr9:121265050-121265150 |
| chr9 | 121322850 | 121322950 | 901-Lng-D-T  | 296 | chr9:121322850-121322950 |
| chr9 | 121730150 | 121730250 | 901-Lng-C-T  | 77  | chr9:121730150-121730250 |

**Table S2: SB Insertion regions**

|      |           |           |              |      |                          |
|------|-----------|-----------|--------------|------|--------------------------|
| chr9 | 121878850 | 121878950 | 1274-Lng-A-T | 185  | chr9:121878850-121878950 |
| chr9 | 121955150 | 121955250 | 1004-Lng-A-T | 52   | chr9:121955150-121955250 |
| chr9 | 122050450 | 122050550 | 1004-Lng-A-T | 82   | chr9:122050450-122050550 |
| chr9 | 122128350 | 122128450 | 1152-Lng-A-T | 192  | chr9:122128350-122128450 |
| chr9 | 122276650 | 122276750 | 901-Lng-B-T  | 236  | chr9:122276650-122276750 |
| chr9 | 122286850 | 122286950 | 1274-Lng-A-T | 161  | chr9:122286850-122286950 |
| chr9 | 122652050 | 122652150 | 1223-Lng-D-T | 47   | chr9:122652050-122652150 |
| chr9 | 122784050 | 122784150 | 901-Lng-B-T  | 121  | chr9:122784050-122784150 |
| chr9 | 122861150 | 122861250 | 1223-Lng-D-T | 55   | chr9:122861150-122861250 |
| chr9 | 122926250 | 122926350 | 1065-Lng-B-T | 59   | chr9:122926250-122926350 |
| chr9 | 122929450 | 122929550 | 846-Lng-A-T  | 125  | chr9:122929450-122929550 |
| chr9 | 123037250 | 123037350 | 1274-Lng-A-T | 207  | chr9:123037250-123037350 |
| chr9 | 123041250 | 123041350 | 1100-Lng-B-T | 212  | chr9:123041250-123041350 |
| chr9 | 123070150 | 123070250 | 901-Lng-D-T  | 104  | chr9:123070150-123070250 |
| chr9 | 123075050 | 123075150 | 1223-Lng-C-T | 60   | chr9:123075050-123075150 |
| chr9 | 123117550 | 123117650 | 1151-Lng-A-T | 409  | chr9:123117550-123117650 |
| chr9 | 123277950 | 123278050 | 1004-Lng-A-T | 49   | chr9:123277950-123278050 |
| chr9 | 123412650 | 123412750 | 1065-Lng-C-T | 137  | chr9:123412650-123412750 |
| chr9 | 123433950 | 123434050 | 1274-Lng-A-T | 56   | chr9:123433950-123434050 |
| chr9 | 123445750 | 123445850 | 1100-Lng-A-T | 51   | chr9:123445750-123445850 |
| chr9 | 123448950 | 123449050 | 1152-Lng-A-T | 37   | chr9:123448950-123449050 |
| chr9 | 123478850 | 123478950 | 1167-Lng-A-T | 66   | chr9:123478850-123478950 |
| chr9 | 123478950 | 123479050 | 1004-Lng-A-T | 53   | chr9:123478950-123479050 |
| chr9 | 123576050 | 123576150 | 901-Lng-D-T  | 512  | chr9:123576050-123576150 |
| chr9 | 123615550 | 123615650 | 901-Lng-A-T  | 86   | chr9:123615550-123615650 |
| chr9 | 123666750 | 123666850 | 1004-Lng-A-T | 49   | chr9:123666750-123666850 |
| chr9 | 123732650 | 123732750 | 1274-Lng-A-T | 119  | chr9:123732650-123732750 |
| chr9 | 123746250 | 123746350 | 1274-Lng-A-T | 1245 | chr9:123746250-123746350 |
| chr9 | 123859650 | 123859750 | 846-Lng-A-T  | 80   | chr9:123859650-123859750 |
| chr9 | 123888750 | 123888850 | 1223-Lng-C-T | 44   | chr9:123888750-123888850 |
| chr9 | 123943150 | 123943250 | 901-Lng-B-T  | 154  | chr9:123943150-123943250 |
| chrX | 3003450   | 3003550   | 901-Lng-B-T  | 93   | chrX:3003450-3003550     |
| chrX | 3906350   | 3906450   | 1167-Lng-A-T | 83   | chrX:3906350-3906450     |
| chrX | 4183850   | 4183950   | 901-Lng-D-T  | 38   | chrX:4183850-4183950     |
| chrX | 4221750   | 4221850   | 1065-Lng-B-T | 56   | chrX:4221750-4221850     |
| chrX | 5023850   | 5023950   | 901-Lng-B-T  | 555  | chrX:5023850-5023950     |
| chrX | 5172650   | 5172750   | 901-Lng-B-T  | 38   | chrX:5172650-5172750     |
| chrX | 5357150   | 5357250   | 1065-Lng-C-T | 64   | chrX:5357150-5357250     |
| chrX | 5378950   | 5379050   | 1100-Lng-A-T | 78   | chrX:5378950-5379050     |
| chrX | 5494350   | 5494450   | 846-Lng-A-T  | 244  | chrX:5494350-5494450     |
| chrX | 5546650   | 5546750   | 1223-Lng-A-T | 376  | chrX:5546650-5546750     |
| chrX | 6033150   | 6033250   | 1065-Lng-B-T | 92   | chrX:6033150-6033250     |
| chrX | 6036250   | 6036350   | 1188-Lng-A-T | 45   | chrX:6036250-6036350     |
| chrX | 6117950   | 6118050   | 901-Lng-D-T  | 86   | chrX:6117950-6118050     |
| chrX | 6121550   | 6121650   | 1065-Lng-B-T | 62   | chrX:6121550-6121650     |
| chrX | 6138550   | 6138650   | 1065-Lng-A-T | 798  | chrX:6138550-6138650     |

**Table S2: SB Insertion regions**

|      |          |          |              |      |                        |
|------|----------|----------|--------------|------|------------------------|
| chrX | 6139550  | 6139650  | 1223-Lng-D-T | 42   | chrX:6139550-6139650   |
| chrX | 6155250  | 6155350  | 1223-Lng-B-T | 377  | chrX:6155250-6155350   |
| chrX | 6166750  | 6166850  | 1223-Lng-B-T | 35   | chrX:6166750-6166850   |
| chrX | 6336550  | 6336650  | 846-Lng-A-T  | 199  | chrX:6336550-6336650   |
| chrX | 6514950  | 6515050  | 901-Lng-C-T  | 81   | chrX:6514950-6515050   |
| chrX | 6520550  | 6520650  | 1065-Lng-C-T | 105  | chrX:6520550-6520650   |
| chrX | 6761150  | 6761250  | 1223-Lng-B-T | 83   | chrX:6761150-6761250   |
| chrX | 6775950  | 6776050  | 1188-Lng-A-T | 53   | chrX:6775950-6776050   |
| chrX | 6810650  | 6810750  | 1065-Lng-A-T | 45   | chrX:6810650-6810750   |
| chrX | 6854950  | 6855050  | 1065-Lng-B-T | 112  | chrX:6854950-6855050   |
| chrX | 7020950  | 7021050  | 901-Lng-A-T  | 538  | chrX:7020950-7021050   |
| chrX | 7041450  | 7041550  | 1223-Lng-A-T | 118  | chrX:7041450-7041550   |
| chrX | 7241750  | 7241850  | 1100-Lng-B-T | 58   | chrX:7241750-7241850   |
| chrX | 7262050  | 7262150  | 901-Lng-D-T  | 307  | chrX:7262050-7262150   |
| chrX | 7516550  | 7516650  | 901-Lng-A-T  | 112  | chrX:7516550-7516650   |
| chrX | 7717350  | 7717450  | 1152-Lng-A-T | 369  | chrX:7717350-7717450   |
| chrX | 7887550  | 7887650  | 1065-Lng-B-T | 55   | chrX:7887550-7887650   |
| chrX | 8090150  | 8090250  | 901-Lng-C-T  | 106  | chrX:8090150-8090250   |
| chrX | 8091050  | 8091150  | 1065-Lng-B-T | 40   | chrX:8091050-8091150   |
| chrX | 8324850  | 8324950  | 1100-Lng-A-T | 79   | chrX:8324850-8324950   |
| chrX | 9136050  | 9136150  | 1223-Lng-B-T | 269  | chrX:9136050-9136150   |
| chrX | 9232750  | 9232850  | 1065-Lng-A-T | 101  | chrX:9232750-9232850   |
| chrX | 9327450  | 9327550  | 1004-Lng-A-T | 97   | chrX:9327450-9327550   |
| chrX | 9338450  | 9338550  | 1223-Lng-D-T | 40   | chrX:9338450-9338550   |
| chrX | 9399050  | 9399150  | 1100-Lng-A-T | 236  | chrX:9399050-9399150   |
| chrX | 9486550  | 9486650  | 1065-Lng-C-T | 61   | chrX:9486550-9486650   |
| chrX | 9494250  | 9494350  | 1065-Lng-B-T | 110  | chrX:9494250-9494350   |
| chrX | 9820450  | 9820550  | 1065-Lng-A-T | 52   | chrX:9820450-9820550   |
| chrX | 10022650 | 10022750 | 1223-Lng-A-T | 129  | chrX:10022650-10022750 |
| chrX | 10223550 | 10223650 | 901-Lng-D-T  | 264  | chrX:10223550-10223650 |
| chrX | 11480250 | 11480350 | 1090-Lng-B-T | 590  | chrX:11480250-11480350 |
| chrX | 11555150 | 11555250 | 901-Lng-C-T  | 38   | chrX:11555150-11555250 |
| chrX | 11598450 | 11598550 | 846-Lng-A-T  | 178  | chrX:11598450-11598550 |
| chrX | 11680150 | 11680250 | 1274-Lng-A-T | 80   | chrX:11680150-11680250 |
| chrX | 11979150 | 11979250 | 1004-Lng-A-T | 61   | chrX:11979150-11979250 |
| chrX | 12013750 | 12013850 | 846-Lng-A-T  | 94   | chrX:12013750-12013850 |
| chrX | 12206750 | 12206850 | 901-Lng-D-T  | 417  | chrX:12206750-12206850 |
| chrX | 12483550 | 12483650 | 901-Lng-C-T  | 40   | chrX:12483550-12483650 |
| chrX | 12499250 | 12499350 | 846-Lng-A-T  | 124  | chrX:12499250-12499350 |
| chrX | 12548850 | 12548950 | 1090-Lng-A-T | 46   | chrX:12548850-12548950 |
| chrX | 12610750 | 12610850 | 1223-Lng-D-T | 40   | chrX:12610750-12610850 |
| chrX | 12660050 | 12660150 | 1274-Lng-A-T | 62   | chrX:12660050-12660150 |
| chrX | 12660650 | 12660750 | 1167-Lng-A-T | 87   | chrX:12660650-12660750 |
| chrX | 12703750 | 12703850 | 1152-Lng-A-T | 208  | chrX:12703750-12703850 |
| chrX | 12736050 | 12736150 | 1065-Lng-C-T | 1655 | chrX:12736050-12736150 |
| chrX | 13224250 | 13224350 | 1004-Lng-A-T | 62   | chrX:13224250-13224350 |

**Table S2: SB Insertion regions**

|      |          |          |              |      |                        |
|------|----------|----------|--------------|------|------------------------|
| chrX | 13273450 | 13273550 | 1065-Lng-B-T | 41   | chrX:13273450-13273550 |
| chrX | 13280550 | 13280650 | 1223-Lng-B-T | 66   | chrX:13280550-13280650 |
| chrX | 13384450 | 13384550 | 1100-Lng-A-T | 111  | chrX:13384450-13384550 |
| chrX | 13396750 | 13396850 | 1100-Lng-A-T | 57   | chrX:13396750-13396850 |
| chrX | 13415150 | 13415250 | 1004-Lng-A-T | 1072 | chrX:13415150-13415250 |
| chrX | 13594250 | 13594350 | 901-Lng-A-T  | 330  | chrX:13594250-13594350 |
| chrX | 13645350 | 13645450 | 1167-Lng-A-T | 53   | chrX:13645350-13645450 |
| chrX | 13865350 | 13865450 | 1223-Lng-A-T | 77   | chrX:13865350-13865450 |
| chrX | 13946850 | 13946950 | 1188-Lng-A-T | 36   | chrX:13946850-13946950 |
| chrX | 14295350 | 14295450 | 846-Lng-A-T  | 298  | chrX:14295350-14295450 |
| chrX | 14333950 | 14334050 | 901-Lng-A-T  | 125  | chrX:14333950-14334050 |
| chrX | 14381950 | 14382050 | 1100-Lng-A-T | 57   | chrX:14381950-14382050 |
| chrX | 14905250 | 14905350 | 1090-Lng-A-T | 94   | chrX:14905250-14905350 |
| chrX | 15304850 | 15304950 | 1100-Lng-A-T | 85   | chrX:15304850-15304950 |
| chrX | 15341950 | 15342050 | 1223-Lng-B-T | 41   | chrX:15341950-15342050 |
| chrX | 15343050 | 15343150 | 1188-Lng-A-T | 43   | chrX:15343050-15343150 |
| chrX | 15353750 | 15353850 | 1065-Lng-B-T | 59   | chrX:15353750-15353850 |
| chrX | 15453750 | 15453850 | 1223-Lng-D-T | 51   | chrX:15453750-15453850 |
| chrX | 16200750 | 16200850 | 1223-Lng-C-T | 64   | chrX:16200750-16200850 |
| chrX | 16285450 | 16285550 | 901-Lng-C-T  | 45   | chrX:16285450-16285550 |
| chrX | 16296150 | 16296250 | 1223-Lng-B-T | 79   | chrX:16296150-16296250 |
| chrX | 16331250 | 16331350 | 1004-Lng-A-T | 84   | chrX:16331250-16331350 |
| chrX | 16537150 | 16537250 | 901-Lng-A-T  | 54   | chrX:16537150-16537250 |
| chrX | 17084850 | 17084950 | 1090-Lng-A-T | 76   | chrX:17084850-17084950 |
| chrX | 17137450 | 17137550 | 1274-Lng-A-T | 159  | chrX:17137450-17137550 |
| chrX | 17496350 | 17496450 | 1065-Lng-B-T | 47   | chrX:17496350-17496450 |
| chrX | 17585650 | 17585750 | 1223-Lng-C-T | 43   | chrX:17585650-17585750 |
| chrX | 17754750 | 17754850 | 1223-Lng-C-T | 44   | chrX:17754750-17754850 |
| chrX | 17764650 | 17764750 | 1090-Lng-A-T | 709  | chrX:17764650-17764750 |
| chrX | 17772150 | 17772250 | 901-Lng-B-T  | 103  | chrX:17772150-17772250 |
| chrX | 17783950 | 17784050 | 1274-Lng-A-T | 75   | chrX:17783950-17784050 |
| chrX | 17823750 | 17823850 | 1223-Lng-B-T | 1168 | chrX:17823750-17823850 |
| chrX | 17828150 | 17828250 | 1223-Lng-B-T | 59   | chrX:17828150-17828250 |
| chrX | 17830250 | 17830350 | 1090-Lng-A-T | 69   | chrX:17830250-17830350 |
| chrX | 17848750 | 17848850 | 901-Lng-B-T  | 190  | chrX:17848750-17848850 |
| chrX | 17855050 | 17855150 | 1188-Lng-A-T | 56   | chrX:17855050-17855150 |
| chrX | 17918150 | 17918250 | 1065-Lng-C-T | 1061 | chrX:17918150-17918250 |
| chrX | 17955150 | 17955250 | 1065-Lng-A-T | 61   | chrX:17955150-17955250 |
| chrX | 17971250 | 17971350 | 1065-Lng-A-T | 234  | chrX:17971250-17971350 |
| chrX | 17978550 | 17978650 | 1223-Lng-B-T | 70   | chrX:17978550-17978650 |
| chrX | 18078450 | 18078550 | 1065-Lng-B-T | 78   | chrX:18078450-18078550 |
| chrX | 18592550 | 18592650 | 1223-Lng-A-T | 243  | chrX:18592550-18592650 |
| chrX | 18653350 | 18653450 | 1004-Lng-A-T | 129  | chrX:18653350-18653450 |
| chrX | 18733550 | 18733650 | 1065-Lng-A-T | 39   | chrX:18733550-18733650 |
| chrX | 18736350 | 18736450 | 1090-Lng-B-T | 306  | chrX:18736350-18736450 |
| chrX | 18746750 | 18746850 | 1151-Lng-A-T | 238  | chrX:18746750-18746850 |

**Table S2: SB Insertion regions**

|      |          |          |              |     |                        |
|------|----------|----------|--------------|-----|------------------------|
| chrX | 19194750 | 19194850 | 901-Lng-A-T  | 88  | chrX:19194750-19194850 |
| chrX | 19628650 | 19628750 | 901-Lng-B-T  | 249 | chrX:19628650-19628750 |
| chrX | 20081350 | 20081450 | 901-Lng-A-T  | 552 | chrX:20081350-20081450 |
| chrX | 20139550 | 20139650 | 846-Lng-A-T  | 137 | chrX:20139550-20139650 |
| chrX | 20149350 | 20149450 | 1100-Lng-A-T | 65  | chrX:20149350-20149450 |
| chrX | 20201450 | 20201550 | 1100-Lng-A-T | 711 | chrX:20201450-20201550 |
| chrX | 20429850 | 20429950 | 1223-Lng-B-T | 39  | chrX:20429850-20429950 |
| chrX | 20464550 | 20464650 | 1065-Lng-C-T | 90  | chrX:20464550-20464650 |
| chrX | 20590950 | 20591050 | 1223-Lng-A-T | 64  | chrX:20590950-20591050 |
| chrX | 20747650 | 20747750 | 901-Lng-C-T  | 76  | chrX:20747650-20747750 |
| chrX | 20810550 | 20810650 | 1151-Lng-A-T | 58  | chrX:20810550-20810650 |
| chrX | 20828850 | 20828950 | 1065-Lng-A-T | 43  | chrX:20828850-20828950 |
| chrX | 21050450 | 21050550 | 1152-Lng-A-T | 62  | chrX:21050450-21050550 |
| chrX | 21142750 | 21142850 | 846-Lng-A-T  | 149 | chrX:21142750-21142850 |
| chrX | 21217450 | 21217550 | 1223-Lng-D-T | 47  | chrX:21217450-21217550 |
| chrX | 21264850 | 21264950 | 1152-Lng-A-T | 59  | chrX:21264850-21264950 |
| chrX | 21283350 | 21283450 | 1188-Lng-A-T | 86  | chrX:21283350-21283450 |
| chrX | 21300350 | 21300450 | 1065-Lng-B-T | 59  | chrX:21300350-21300450 |
| chrX | 21354450 | 21354550 | 1065-Lng-B-T | 135 | chrX:21354450-21354550 |
| chrX | 21510850 | 21510950 | 1167-Lng-A-T | 55  | chrX:21510850-21510950 |
| chrX | 21514250 | 21514350 | 846-Lng-A-T  | 379 | chrX:21514250-21514350 |
| chrX | 22433450 | 22433550 | 1065-Lng-C-T | 71  | chrX:22433450-22433550 |
| chrX | 22439750 | 22439850 | 1151-Lng-A-T | 96  | chrX:22439750-22439850 |
| chrX | 22468250 | 22468350 | 1188-Lng-A-T | 39  | chrX:22468250-22468350 |
| chrX | 22685950 | 22686050 | 1072-Lng-A-T | 51  | chrX:22685950-22686050 |
| chrX | 22769850 | 22769950 | 901-Lng-C-T  | 92  | chrX:22769850-22769950 |
| chrX | 22807550 | 22807650 | 1065-Lng-A-T | 90  | chrX:22807550-22807650 |
| chrX | 22894350 | 22894450 | 1065-Lng-A-T | 84  | chrX:22894350-22894450 |
| chrX | 22922150 | 22922250 | 901-Lng-C-T  | 387 | chrX:22922150-22922250 |
| chrX | 23000750 | 23000850 | 1223-Lng-B-T | 41  | chrX:23000750-23000850 |
| chrX | 23077950 | 23078050 | 1065-Lng-B-T | 56  | chrX:23077950-23078050 |
| chrX | 23284150 | 23284250 | 846-Lng-A-T  | 170 | chrX:23284150-23284250 |
| chrX | 23375350 | 23375450 | 1151-Lng-A-T | 144 | chrX:23375350-23375450 |
| chrX | 23626450 | 23626550 | 1274-Lng-A-T | 79  | chrX:23626450-23626550 |
| chrX | 23980550 | 23980650 | 1274-Lng-A-T | 136 | chrX:23980550-23980650 |
| chrX | 24049350 | 24049450 | 1004-Lng-A-T | 337 | chrX:24049350-24049450 |
| chrX | 24265750 | 24265850 | 901-Lng-C-T  | 50  | chrX:24265750-24265850 |
| chrX | 31934150 | 31934250 | 901-Lng-D-T  | 52  | chrX:31934150-31934250 |
| chrX | 32129650 | 32129750 | 1065-Lng-A-T | 35  | chrX:32129650-32129750 |
| chrX | 32153850 | 32153950 | 1090-Lng-B-T | 369 | chrX:32153850-32153950 |
| chrX | 33223550 | 33223650 | 901-Lng-B-T  | 85  | chrX:33223550-33223650 |
| chrX | 33675450 | 33675550 | 1274-Lng-A-T | 179 | chrX:33675450-33675550 |
| chrX | 33684350 | 33684450 | 1274-Lng-A-T | 57  | chrX:33684350-33684450 |
| chrX | 33716950 | 33717050 | 1223-Lng-C-T | 43  | chrX:33716950-33717050 |
| chrX | 34297450 | 34297550 | 1065-Lng-B-T | 62  | chrX:34297450-34297550 |
| chrX | 34376050 | 34376150 | 1223-Lng-D-T | 119 | chrX:34376050-34376150 |



**Table S2: SB Insertion regions**

|      |          |          |              |      |                        |
|------|----------|----------|--------------|------|------------------------|
| chrX | 34432050 | 34432150 | 1223-Lng-C-T | 58   | chrX:34432050-34432150 |
| chrX | 34516950 | 34517050 | 1065-Lng-C-T | 359  | chrX:34516950-34517050 |
| chrX | 34582250 | 34582350 | 1072-Lng-A-T | 116  | chrX:34582250-34582350 |
| chrX | 34693750 | 34693850 | 1151-Lng-A-T | 254  | chrX:34693750-34693850 |
| chrX | 34707850 | 34707950 | 1065-Lng-C-T | 65   | chrX:34707850-34707950 |
| chrX | 34729850 | 34729950 | 1090-Lng-A-T | 535  | chrX:34729850-34729950 |
| chrX | 35569650 | 35569750 | 1065-Lng-C-T | 82   | chrX:35569650-35569750 |
| chrX | 35591150 | 35591250 | 1274-Lng-A-T | 76   | chrX:35591150-35591250 |
| chrX | 35790950 | 35791050 | 1090-Lng-A-T | 89   | chrX:35790950-35791050 |
| chrX | 35901450 | 35901550 | 1065-Lng-B-T | 71   | chrX:35901450-35901550 |
| chrX | 35981650 | 35981750 | 1223-Lng-B-T | 51   | chrX:35981650-35981750 |
| chrX | 36178350 | 36178450 | 1100-Lng-A-T | 125  | chrX:36178350-36178450 |
| chrX | 36178450 | 36178550 | 901-Lng-B-T  | 250  | chrX:36178450-36178550 |
| chrX | 36252750 | 36252850 | 901-Lng-B-T  | 118  | chrX:36252750-36252850 |
| chrX | 36502250 | 36502350 | 1274-Lng-A-T | 189  | chrX:36502250-36502350 |
| chrX | 36543150 | 36543250 | 901-Lng-A-T  | 59   | chrX:36543150-36543250 |
| chrX | 36602750 | 36602850 | 901-Lng-B-T  | 74   | chrX:36602750-36602850 |
| chrX | 36768450 | 36768550 | 846-Lng-A-T  | 102  | chrX:36768450-36768550 |
| chrX | 36779750 | 36779850 | 846-Lng-A-T  | 119  | chrX:36779750-36779850 |
| chrX | 37022850 | 37022950 | 1065-Lng-C-T | 353  | chrX:37022850-37022950 |
| chrX | 37115250 | 37115350 | 901-Lng-C-T  | 91   | chrX:37115250-37115350 |
| chrX | 37407050 | 37407150 | 1004-Lng-A-T | 1516 | chrX:37407050-37407150 |
| chrX | 37407750 | 37407850 | 1004-Lng-A-T | 205  | chrX:37407750-37407850 |
| chrX | 37411950 | 37412050 | 1004-Lng-A-T | 57   | chrX:37411950-37412050 |
| chrX | 37434550 | 37434650 | 1004-Lng-A-T | 53   | chrX:37434550-37434650 |
| chrX | 37446550 | 37446650 | 1004-Lng-A-T | 52   | chrX:37446550-37446650 |
| chrX | 37546750 | 37546850 | 1072-Lng-A-T | 111  | chrX:37546750-37546850 |
| chrX | 37706950 | 37707050 | 1065-Lng-A-T | 45   | chrX:37706950-37707050 |
| chrX | 37862050 | 37862150 | 1223-Lng-A-T | 868  | chrX:37862050-37862150 |
| chrX | 38037050 | 38037150 | 1004-Lng-A-T | 66   | chrX:38037050-38037150 |
| chrX | 38250950 | 38251050 | 1223-Lng-D-T | 40   | chrX:38250950-38251050 |
| chrX | 38258550 | 38258650 | 901-Lng-B-T  | 44   | chrX:38258550-38258650 |
| chrX | 38556150 | 38556250 | 1223-Lng-B-T | 47   | chrX:38556150-38556250 |
| chrX | 38734750 | 38734850 | 901-Lng-B-T  | 471  | chrX:38734750-38734850 |
| chrX | 38924850 | 38924950 | 1065-Lng-B-T | 52   | chrX:38924850-38924950 |
| chrX | 39018750 | 39018850 | 1100-Lng-B-T | 91   | chrX:39018750-39018850 |
| chrX | 39147950 | 39148050 | 1151-Lng-A-T | 202  | chrX:39147950-39148050 |
| chrX | 39149350 | 39149450 | 1100-Lng-B-T | 116  | chrX:39149350-39149450 |
| chrX | 39273150 | 39273250 | 901-Lng-B-T  | 83   | chrX:39273150-39273250 |
| chrX | 39303050 | 39303150 | 1100-Lng-B-T | 411  | chrX:39303050-39303150 |
| chrX | 39312650 | 39312750 | 1100-Lng-B-T | 53   | chrX:39312650-39312750 |
| chrX | 39351950 | 39352050 | 1065-Lng-C-T | 145  | chrX:39351950-39352050 |
| chrX | 39418450 | 39418550 | 901-Lng-A-T  | 92   | chrX:39418450-39418550 |
| chrX | 39462750 | 39462850 | 901-Lng-A-T  | 50   | chrX:39462750-39462850 |
| chrX | 39507250 | 39507350 | 901-Lng-A-T  | 313  | chrX:39507250-39507350 |
| chrX | 39530750 | 39530850 | 1100-Lng-A-T | 60   | chrX:39530750-39530850 |

**Table S2: SB Insertion regions**

|      |          |          |              |      |                        |
|------|----------|----------|--------------|------|------------------------|
| chrX | 39548450 | 39548550 | 1188-Lng-A-T | 45   | chrX:39548450-39548550 |
| chrX | 39551550 | 39551650 | 1167-Lng-A-T | 132  | chrX:39551550-39551650 |
| chrX | 39575250 | 39575350 | 1100-Lng-A-T | 75   | chrX:39575250-39575350 |
| chrX | 39583250 | 39583350 | 1065-Lng-A-T | 74   | chrX:39583250-39583350 |
| chrX | 39583750 | 39583850 | 1100-Lng-A-T | 138  | chrX:39583750-39583850 |
| chrX | 39599850 | 39599950 | 1100-Lng-A-T | 69   | chrX:39599850-39599950 |
| chrX | 39607950 | 39608050 | 901-Lng-D-T  | 80   | chrX:39607950-39608050 |
| chrX | 39612750 | 39612850 | 1065-Lng-B-T | 58   | chrX:39612750-39612850 |
| chrX | 39625550 | 39625650 | 1274-Lng-A-T | 229  | chrX:39625550-39625650 |
| chrX | 39626850 | 39626950 | 901-Lng-A-T  | 52   | chrX:39626850-39626950 |
| chrX | 39775350 | 39775450 | 901-Lng-B-T  | 49   | chrX:39775350-39775450 |
| chrX | 39775950 | 39776050 | 901-Lng-B-T  | 301  | chrX:39775950-39776050 |
| chrX | 39782150 | 39782250 | 1223-Lng-B-T | 175  | chrX:39782150-39782250 |
| chrX | 39790850 | 39790950 | 1100-Lng-B-T | 1358 | chrX:39790850-39790950 |
| chrX | 39802950 | 39803050 | 1090-Lng-B-T | 274  | chrX:39802950-39803050 |
| chrX | 40272350 | 40272450 | 1152-Lng-A-T | 94   | chrX:40272350-40272450 |
| chrX | 40478850 | 40478950 | 1152-Lng-A-T | 151  | chrX:40478850-40478950 |
| chrX | 40578650 | 40578750 | 1065-Lng-A-T | 246  | chrX:40578650-40578750 |
| chrX | 40703650 | 40703750 | 901-Lng-C-T  | 55   | chrX:40703650-40703750 |
| chrX | 40796350 | 40796450 | 1100-Lng-A-T | 60   | chrX:40796350-40796450 |
| chrX | 40798650 | 40798750 | 846-Lng-A-T  | 186  | chrX:40798650-40798750 |
| chrX | 40819450 | 40819550 | 901-Lng-B-T  | 193  | chrX:40819450-40819550 |
| chrX | 40878450 | 40878550 | 901-Lng-B-T  | 125  | chrX:40878450-40878550 |
| chrX | 41000750 | 41000850 | 1223-Lng-B-T | 40   | chrX:41000750-41000850 |
| chrX | 41324150 | 41324250 | 1004-Lng-A-T | 161  | chrX:41324150-41324250 |
| chrX | 41725950 | 41726050 | 901-Lng-B-T  | 90   | chrX:41725950-41726050 |
| chrX | 42158850 | 42158950 | 1223-Lng-D-T | 65   | chrX:42158850-42158950 |
| chrX | 42193850 | 42193950 | 901-Lng-A-T  | 103  | chrX:42193850-42193950 |
| chrX | 42273750 | 42273850 | 1223-Lng-C-T | 45   | chrX:42273750-42273850 |
| chrX | 42353450 | 42353550 | 1065-Lng-A-T | 51   | chrX:42353450-42353550 |
| chrX | 42604750 | 42604850 | 1065-Lng-C-T | 66   | chrX:42604750-42604850 |
| chrX | 42765050 | 42765150 | 1223-Lng-B-T | 38   | chrX:42765050-42765150 |
| chrX | 42982550 | 42982650 | 1223-Lng-B-T | 34   | chrX:42982550-42982650 |
| chrX | 43226150 | 43226250 | 901-Lng-C-T  | 40   | chrX:43226150-43226250 |
| chrX | 43267950 | 43268050 | 901-Lng-A-T  | 135  | chrX:43267950-43268050 |
| chrX | 43347450 | 43347550 | 1223-Lng-B-T | 49   | chrX:43347450-43347550 |
| chrX | 43488950 | 43489050 | 1004-Lng-A-T | 76   | chrX:43488950-43489050 |
| chrX | 43593450 | 43593550 | 1065-Lng-B-T | 102  | chrX:43593450-43593550 |
| chrX | 43698350 | 43698450 | 1223-Lng-B-T | 54   | chrX:43698350-43698450 |
| chrX | 43735450 | 43735550 | 1072-Lng-A-T | 57   | chrX:43735450-43735550 |
| chrX | 43843050 | 43843150 | 1152-Lng-A-T | 35   | chrX:43843050-43843150 |
| chrX | 44004550 | 44004650 | 1004-Lng-A-T | 573  | chrX:44004550-44004650 |
| chrX | 44450350 | 44450450 | 1090-Lng-A-T | 93   | chrX:44450350-44450450 |
| chrX | 44517250 | 44517350 | 1065-Lng-C-T | 545  | chrX:44517250-44517350 |
| chrX | 44541250 | 44541350 | 1223-Lng-B-T | 38   | chrX:44541250-44541350 |
| chrX | 44610050 | 44610150 | 1072-Lng-A-T | 131  | chrX:44610050-44610150 |

**Table S2: SB Insertion regions**

|      |          |          |              |     |                        |
|------|----------|----------|--------------|-----|------------------------|
| chrX | 45266950 | 45267050 | 1151-Lng-A-T | 58  | chrX:45266950-45267050 |
| chrX | 45306950 | 45307050 | 846-Lng-A-T  | 101 | chrX:45306950-45307050 |
| chrX | 45356750 | 45356850 | 1004-Lng-A-T | 78  | chrX:45356750-45356850 |
| chrX | 45544250 | 45544350 | 1223-Lng-C-T | 44  | chrX:45544250-45544350 |
| chrX | 45733350 | 45733450 | 1274-Lng-A-T | 82  | chrX:45733350-45733450 |
| chrX | 45736650 | 45736750 | 1065-Lng-C-T | 103 | chrX:45736650-45736750 |
| chrX | 45845250 | 45845350 | 1065-Lng-A-T | 99  | chrX:45845250-45845350 |
| chrX | 45849750 | 45849850 | 1152-Lng-A-T | 32  | chrX:45849750-45849850 |
| chrX | 45891250 | 45891350 | 1090-Lng-A-T | 95  | chrX:45891250-45891350 |
| chrX | 45987550 | 45987650 | 1065-Lng-C-T | 115 | chrX:45987550-45987650 |
| chrX | 46480950 | 46481050 | 1072-Lng-A-T | 48  | chrX:46480950-46481050 |
| chrX | 46481650 | 46481750 | 1223-Lng-D-T | 99  | chrX:46481650-46481750 |
| chrX | 46520250 | 46520350 | 901-Lng-C-T  | 110 | chrX:46520250-46520350 |
| chrX | 46569450 | 46569550 | 1188-Lng-A-T | 149 | chrX:46569450-46569550 |
| chrX | 46633750 | 46633850 | 1223-Lng-B-T | 49  | chrX:46633750-46633850 |
| chrX | 47008250 | 47008350 | 901-Lng-B-T  | 299 | chrX:47008250-47008350 |
| chrX | 47246750 | 47246850 | 1274-Lng-A-T | 233 | chrX:47246750-47246850 |
| chrX | 47271950 | 47272050 | 846-Lng-A-T  | 108 | chrX:47271950-47272050 |
| chrX | 47433350 | 47433450 | 846-Lng-A-T  | 185 | chrX:47433350-47433450 |
| chrX | 47572950 | 47573050 | 901-Lng-D-T  | 685 | chrX:47572950-47573050 |
| chrX | 47686750 | 47686850 | 1223-Lng-C-T | 68  | chrX:47686750-47686850 |
| chrX | 48084950 | 48085050 | 901-Lng-A-T  | 69  | chrX:48084950-48085050 |
| chrX | 48494150 | 48494250 | 1100-Lng-A-T | 278 | chrX:48494150-48494250 |
| chrX | 48494950 | 48495050 | 1100-Lng-A-T | 161 | chrX:48494950-48495050 |
| chrX | 48757950 | 48758050 | 1065-Lng-B-T | 81  | chrX:48757950-48758050 |
| chrX | 48771250 | 48771350 | 1167-Lng-A-T | 62  | chrX:48771250-48771350 |
| chrX | 48850450 | 48850550 | 1223-Lng-B-T | 36  | chrX:48850450-48850550 |
| chrX | 49030550 | 49030650 | 1100-Lng-B-T | 70  | chrX:49030550-49030650 |
| chrX | 49443950 | 49444050 | 1065-Lng-A-T | 95  | chrX:49443950-49444050 |
| chrX | 49451750 | 49451850 | 1072-Lng-A-T | 54  | chrX:49451750-49451850 |
| chrX | 49470950 | 49471050 | 1188-Lng-A-T | 61  | chrX:49470950-49471050 |
| chrX | 49481050 | 49481150 | 1223-Lng-A-T | 172 | chrX:49481050-49481150 |
| chrX | 49632750 | 49632850 | 1188-Lng-A-T | 42  | chrX:49632750-49632850 |
| chrX | 49717050 | 49717150 | 1167-Lng-A-T | 105 | chrX:49717050-49717150 |
| chrX | 49748250 | 49748350 | 1065-Lng-A-T | 125 | chrX:49748250-49748350 |
| chrX | 49854450 | 49854550 | 1223-Lng-B-T | 41  | chrX:49854450-49854550 |
| chrX | 49857250 | 49857350 | 1065-Lng-B-T | 96  | chrX:49857250-49857350 |
| chrX | 49872650 | 49872750 | 1223-Lng-C-T | 52  | chrX:49872650-49872750 |
| chrX | 49883050 | 49883150 | 1065-Lng-B-T | 71  | chrX:49883050-49883150 |
| chrX | 50038750 | 50038850 | 1223-Lng-B-T | 282 | chrX:50038750-50038850 |
| chrX | 50289050 | 50289150 | 1004-Lng-A-T | 58  | chrX:50289050-50289150 |
| chrX | 50292050 | 50292150 | 846-Lng-A-T  | 141 | chrX:50292050-50292150 |
| chrX | 50345650 | 50345750 | 901-Lng-B-T  | 163 | chrX:50345650-50345750 |
| chrX | 50482050 | 50482150 | 846-Lng-A-T  | 289 | chrX:50482050-50482150 |
| chrX | 50955150 | 50955250 | 1065-Lng-A-T | 37  | chrX:50955150-50955250 |
| chrX | 51101350 | 51101450 | 1188-Lng-A-T | 35  | chrX:51101350-51101450 |

**Table S2: SB Insertion regions**

|      |          |          |              |     |                        |
|------|----------|----------|--------------|-----|------------------------|
| chrX | 51136650 | 51136750 | 1152-Lng-A-T | 43  | chrX:51136650-51136750 |
| chrX | 51193350 | 51193450 | 1065-Lng-C-T | 93  | chrX:51193350-51193450 |
| chrX | 51201650 | 51201750 | 901-Lng-D-T  | 699 | chrX:51201650-51201750 |
| chrX | 51376350 | 51376450 | 1100-Lng-A-T | 85  | chrX:51376350-51376450 |
| chrX | 51383750 | 51383850 | 1072-Lng-A-T | 296 | chrX:51383750-51383850 |
| chrX | 51403150 | 51403250 | 1090-Lng-A-T | 59  | chrX:51403150-51403250 |
| chrX | 52807650 | 52807750 | 1188-Lng-A-T | 441 | chrX:52807650-52807750 |
| chrX | 53847050 | 53847150 | 1065-Lng-A-T | 69  | chrX:53847050-53847150 |
| chrX | 53854650 | 53854750 | 1223-Lng-C-T | 286 | chrX:53854650-53854750 |
| chrX | 53939150 | 53939250 | 1151-Lng-A-T | 304 | chrX:53939150-53939250 |
| chrX | 54008350 | 54008450 | 1151-Lng-A-T | 210 | chrX:54008350-54008450 |
| chrX | 54269850 | 54269950 | 1065-Lng-A-T | 55  | chrX:54269850-54269950 |
| chrX | 54548350 | 54548450 | 1065-Lng-B-T | 51  | chrX:54548350-54548450 |
| chrX | 54905750 | 54905850 | 846-Lng-A-T  | 140 | chrX:54905750-54905850 |
| chrX | 54924950 | 54925050 | 1151-Lng-A-T | 69  | chrX:54924950-54925050 |
| chrX | 54939750 | 54939850 | 1065-Lng-A-T | 637 | chrX:54939750-54939850 |
| chrX | 55002050 | 55002150 | 1100-Lng-B-T | 53  | chrX:55002050-55002150 |
| chrX | 55149850 | 55149950 | 1065-Lng-A-T | 104 | chrX:55149850-55149950 |
| chrX | 55523650 | 55523750 | 1065-Lng-B-T | 54  | chrX:55523650-55523750 |
| chrX | 55524350 | 55524450 | 1072-Lng-A-T | 69  | chrX:55524350-55524450 |
| chrX | 56162250 | 56162350 | 901-Lng-B-T  | 113 | chrX:56162250-56162350 |
| chrX | 56197850 | 56197950 | 1004-Lng-A-T | 730 | chrX:56197850-56197950 |
| chrX | 56247150 | 56247250 | 901-Lng-C-T  | 48  | chrX:56247150-56247250 |
| chrX | 56277450 | 56277550 | 1223-Lng-A-T | 97  | chrX:56277450-56277550 |
| chrX | 56339050 | 56339150 | 901-Lng-C-T  | 37  | chrX:56339050-56339150 |
| chrX | 56416050 | 56416150 | 1065-Lng-B-T | 81  | chrX:56416050-56416150 |
| chrX | 56959150 | 56959250 | 1223-Lng-D-T | 44  | chrX:56959150-56959250 |
| chrX | 57243050 | 57243150 | 1065-Lng-B-T | 60  | chrX:57243050-57243150 |
| chrX | 57314950 | 57315050 | 1090-Lng-A-T | 54  | chrX:57314950-57315050 |
| chrX | 57375250 | 57375350 | 1223-Lng-B-T | 36  | chrX:57375250-57375350 |
| chrX | 57582950 | 57583050 | 901-Lng-D-T  | 123 | chrX:57582950-57583050 |
| chrX | 57589250 | 57589350 | 1151-Lng-A-T | 371 | chrX:57589250-57589350 |
| chrX | 57600350 | 57600450 | 1223-Lng-B-T | 35  | chrX:57600350-57600450 |
| chrX | 58243750 | 58243850 | 1152-Lng-A-T | 41  | chrX:58243750-58243850 |
| chrX | 58436550 | 58436650 | 901-Lng-A-T  | 200 | chrX:58436550-58436650 |
| chrX | 58535950 | 58536050 | 1090-Lng-A-T | 79  | chrX:58535950-58536050 |
| chrX | 58793850 | 58793950 | 1090-Lng-A-T | 68  | chrX:58793850-58793950 |
| chrX | 59078350 | 59078450 | 846-Lng-A-T  | 53  | chrX:59078350-59078450 |
| chrX | 59096050 | 59096150 | 1151-Lng-A-T | 59  | chrX:59096050-59096150 |
| chrX | 59156950 | 59157050 | 1065-Lng-A-T | 228 | chrX:59156950-59157050 |
| chrX | 59438850 | 59438950 | 1065-Lng-B-T | 64  | chrX:59438850-59438950 |
| chrX | 59570150 | 59570250 | 846-Lng-A-T  | 124 | chrX:59570150-59570250 |
| chrX | 59636750 | 59636850 | 1065-Lng-B-T | 63  | chrX:59636750-59636850 |
| chrX | 59640350 | 59640450 | 846-Lng-A-T  | 122 | chrX:59640350-59640450 |
| chrX | 59651250 | 59651350 | 1065-Lng-A-T | 66  | chrX:59651250-59651350 |
| chrX | 59855350 | 59855450 | 1090-Lng-A-T | 132 | chrX:59855350-59855450 |

**Table S2: SB Insertion regions**

|      |          |          |              |      |                        |
|------|----------|----------|--------------|------|------------------------|
| chrX | 60124950 | 60125050 | 1004-Lng-A-T | 62   | chrX:60124950-60125050 |
| chrX | 60154250 | 60154350 | 1065-Lng-C-T | 104  | chrX:60154250-60154350 |
| chrX | 60578250 | 60578350 | 1004-Lng-A-T | 50   | chrX:60578250-60578350 |
| chrX | 60590350 | 60590450 | 901-Lng-D-T  | 297  | chrX:60590350-60590450 |
| chrX | 60651850 | 60651950 | 1065-Lng-B-T | 124  | chrX:60651850-60651950 |
| chrX | 60659950 | 60660050 | 901-Lng-A-T  | 453  | chrX:60659950-60660050 |
| chrX | 60854050 | 60854150 | 1065-Lng-B-T | 91   | chrX:60854050-60854150 |
| chrX | 61041350 | 61041450 | 1065-Lng-C-T | 111  | chrX:61041350-61041450 |
| chrX | 61057750 | 61057850 | 1223-Lng-C-T | 46   | chrX:61057750-61057850 |
| chrX | 61077050 | 61077150 | 846-Lng-A-T  | 43   | chrX:61077050-61077150 |
| chrX | 61259750 | 61259850 | 1223-Lng-C-T | 52   | chrX:61259750-61259850 |
| chrX | 61276050 | 61276150 | 1065-Lng-C-T | 94   | chrX:61276050-61276150 |
| chrX | 61345350 | 61345450 | 901-Lng-B-T  | 56   | chrX:61345350-61345450 |
| chrX | 61480950 | 61481050 | 1090-Lng-B-T | 257  | chrX:61480950-61481050 |
| chrX | 61764650 | 61764750 | 1223-Lng-A-T | 1253 | chrX:61764650-61764750 |
| chrX | 62154850 | 62154950 | 1223-Lng-B-T | 39   | chrX:62154850-62154950 |
| chrX | 62424550 | 62424650 | 901-Lng-C-T  | 74   | chrX:62424550-62424650 |
| chrX | 62537150 | 62537250 | 1223-Lng-B-T | 40   | chrX:62537150-62537250 |
| chrX | 62749650 | 62749750 | 901-Lng-A-T  | 61   | chrX:62749650-62749750 |
| chrX | 62841950 | 62842050 | 1004-Lng-A-T | 117  | chrX:62841950-62842050 |
| chrX | 62954350 | 62954450 | 901-Lng-A-T  | 87   | chrX:62954350-62954450 |
| chrX | 62959850 | 62959950 | 901-Lng-D-T  | 309  | chrX:62959850-62959950 |
| chrX | 63187250 | 63187350 | 846-Lng-A-T  | 159  | chrX:63187250-63187350 |
| chrX | 63318950 | 63319050 | 1223-Lng-A-T | 271  | chrX:63318950-63319050 |
| chrX | 63359050 | 63359150 | 1065-Lng-A-T | 49   | chrX:63359050-63359150 |
| chrX | 63424150 | 63424250 | 901-Lng-A-T  | 74   | chrX:63424150-63424250 |
| chrX | 63446450 | 63446550 | 1065-Lng-C-T | 96   | chrX:63446450-63446550 |
| chrX | 63595850 | 63595950 | 1223-Lng-A-T | 148  | chrX:63595850-63595950 |
| chrX | 63741250 | 63741350 | 1223-Lng-B-T | 43   | chrX:63741250-63741350 |
| chrX | 63922750 | 63922850 | 1151-Lng-A-T | 95   | chrX:63922750-63922850 |
| chrX | 63947550 | 63947650 | 1072-Lng-A-T | 67   | chrX:63947550-63947650 |
| chrX | 63947750 | 63947850 | 901-Lng-C-T  | 40   | chrX:63947750-63947850 |
| chrX | 64001750 | 64001850 | 901-Lng-A-T  | 63   | chrX:64001750-64001850 |
| chrX | 64046350 | 64046450 | 1065-Lng-C-T | 95   | chrX:64046350-64046450 |
| chrX | 64332750 | 64332850 | 1274-Lng-A-T | 107  | chrX:64332750-64332850 |
| chrX | 64335250 | 64335350 | 1167-Lng-A-T | 158  | chrX:64335250-64335350 |
| chrX | 64648250 | 64648350 | 1065-Lng-A-T | 57   | chrX:64648250-64648350 |
| chrX | 64693950 | 64694050 | 1188-Lng-A-T | 47   | chrX:64693950-64694050 |
| chrX | 64869850 | 64869950 | 901-Lng-C-T  | 135  | chrX:64869850-64869950 |
| chrX | 65059950 | 65060050 | 901-Lng-D-T  | 130  | chrX:65059950-65060050 |
| chrX | 65114750 | 65114850 | 1065-Lng-C-T | 64   | chrX:65114750-65114850 |
| chrX | 65329250 | 65329350 | 1004-Lng-A-T | 104  | chrX:65329250-65329350 |
| chrX | 65568050 | 65568150 | 1151-Lng-A-T | 54   | chrX:65568050-65568150 |
| chrX | 65604950 | 65605050 | 1223-Lng-A-T | 91   | chrX:65604950-65605050 |
| chrX | 65670850 | 65670950 | 1065-Lng-B-T | 74   | chrX:65670850-65670950 |
| chrX | 65712850 | 65712950 | 901-Lng-B-T  | 99   | chrX:65712850-65712950 |

**Table S2: SB Insertion regions**

|      |          |          |              |      |                        |
|------|----------|----------|--------------|------|------------------------|
| chrX | 65927350 | 65927450 | 901-Lng-A-T  | 538  | chrX:65927350-65927450 |
| chrX | 65952250 | 65952350 | 1151-Lng-A-T | 118  | chrX:65952250-65952350 |
| chrX | 65972950 | 65973050 | 901-Lng-D-T  | 572  | chrX:65972950-65973050 |
| chrX | 66582850 | 66582950 | 1223-Lng-A-T | 1023 | chrX:66582850-66582950 |
| chrX | 66618650 | 66618750 | 1152-Lng-A-T | 273  | chrX:66618650-66618750 |
| chrX | 66631450 | 66631550 | 1223-Lng-D-T | 42   | chrX:66631450-66631550 |
| chrX | 66807450 | 66807550 | 1274-Lng-A-T | 60   | chrX:66807450-66807550 |
| chrX | 66865450 | 66865550 | 1065-Lng-C-T | 77   | chrX:66865450-66865550 |
| chrX | 66872950 | 66873050 | 1065-Lng-B-T | 96   | chrX:66872950-66873050 |
| chrX | 67003950 | 67004050 | 1065-Lng-B-T | 84   | chrX:67003950-67004050 |
| chrX | 67013650 | 67013750 | 1151-Lng-A-T | 57   | chrX:67013650-67013750 |
| chrX | 67168250 | 67168350 | 1223-Lng-B-T | 59   | chrX:67168250-67168350 |
| chrX | 67220350 | 67220450 | 901-Lng-B-T  | 41   | chrX:67220350-67220450 |
| chrX | 67418150 | 67418250 | 901-Lng-A-T  | 557  | chrX:67418150-67418250 |
| chrX | 67497550 | 67497650 | 901-Lng-C-T  | 72   | chrX:67497550-67497650 |
| chrX | 68624750 | 68624850 | 1065-Lng-A-T | 707  | chrX:68624750-68624850 |
| chrX | 68628850 | 68628950 | 1090-Lng-A-T | 65   | chrX:68628850-68628950 |
| chrX | 68629150 | 68629250 | 1065-Lng-C-T | 110  | chrX:68629150-68629250 |
| chrX | 68642050 | 68642150 | 1065-Lng-B-T | 58   | chrX:68642050-68642150 |
| chrX | 68653850 | 68653950 | 1065-Lng-B-T | 48   | chrX:68653850-68653950 |
| chrX | 68660550 | 68660650 | 1100-Lng-A-T | 65   | chrX:68660550-68660650 |
| chrX | 68783050 | 68783150 | 1065-Lng-A-T | 523  | chrX:68783050-68783150 |
| chrX | 68865950 | 68866050 | 846-Lng-A-T  | 65   | chrX:68865950-68866050 |
| chrX | 69446650 | 69446750 | 1223-Lng-C-T | 54   | chrX:69446650-69446750 |
| chrX | 69541850 | 69541950 | 1274-Lng-A-T | 52   | chrX:69541850-69541950 |
| chrX | 69596150 | 69596250 | 1065-Lng-B-T | 54   | chrX:69596150-69596250 |
| chrX | 69788350 | 69788450 | 1065-Lng-B-T | 43   | chrX:69788350-69788450 |
| chrX | 70230250 | 70230350 | 1100-Lng-A-T | 602  | chrX:70230250-70230350 |
| chrX | 70254850 | 70254950 | 1223-Lng-B-T | 148  | chrX:70254850-70254950 |
| chrX | 70596850 | 70596950 | 901-Lng-C-T  | 56   | chrX:70596850-70596950 |
| chrX | 70688750 | 70688850 | 1065-Lng-B-T | 61   | chrX:70688750-70688850 |
| chrX | 70742950 | 70743050 | 901-Lng-D-T  | 183  | chrX:70742950-70743050 |
| chrX | 70825050 | 70825150 | 846-Lng-A-T  | 253  | chrX:70825050-70825150 |
| chrX | 70865750 | 70865850 | 846-Lng-A-T  | 147  | chrX:70865750-70865850 |
| chrX | 70936550 | 70936650 | 1090-Lng-B-T | 375  | chrX:70936550-70936650 |
| chrX | 70951150 | 70951250 | 846-Lng-A-T  | 48   | chrX:70951150-70951250 |
| chrX | 70966950 | 70967050 | 1065-Lng-C-T | 72   | chrX:70966950-70967050 |
| chrX | 71188150 | 71188250 | 1223-Lng-A-T | 57   | chrX:71188150-71188250 |
| chrX | 71297650 | 71297750 | 901-Lng-C-T  | 42   | chrX:71297650-71297750 |
| chrX | 71314350 | 71314450 | 901-Lng-A-T  | 118  | chrX:71314350-71314450 |
| chrX | 71536750 | 71536850 | 1274-Lng-A-T | 53   | chrX:71536750-71536850 |
| chrX | 71569650 | 71569750 | 1223-Lng-B-T | 59   | chrX:71569650-71569750 |
| chrX | 72360150 | 72360250 | 846-Lng-A-T  | 94   | chrX:72360150-72360250 |
| chrX | 72647950 | 72648050 | 846-Lng-A-T  | 112  | chrX:72647950-72648050 |
| chrX | 72673150 | 72673250 | 1065-Lng-B-T | 90   | chrX:72673150-72673250 |
| chrX | 72699050 | 72699150 | 1188-Lng-A-T | 221  | chrX:72699050-72699150 |

**Table S2: SB Insertion regions**

|      |          |          |              |      |                        |
|------|----------|----------|--------------|------|------------------------|
| chrX | 72711750 | 72711850 | 1065-Lng-C-T | 1329 | chrX:72711750-72711850 |
| chrX | 72911850 | 72911950 | 1065-Lng-A-T | 162  | chrX:72911850-72911950 |
| chrX | 72946250 | 72946350 | 1065-Lng-B-T | 84   | chrX:72946250-72946350 |
| chrX | 72959650 | 72959750 | 1223-Lng-A-T | 85   | chrX:72959650-72959750 |
| chrX | 73031750 | 73031850 | 1065-Lng-A-T | 95   | chrX:73031750-73031850 |
| chrX | 73049750 | 73049850 | 1223-Lng-D-T | 45   | chrX:73049750-73049850 |
| chrX | 73302250 | 73302350 | 1223-Lng-A-T | 66   | chrX:73302250-73302350 |
| chrX | 73347650 | 73347750 | 1004-Lng-A-T | 652  | chrX:73347650-73347750 |
| chrX | 73461750 | 73461850 | 1223-Lng-B-T | 80   | chrX:73461750-73461850 |
| chrX | 73637250 | 73637350 | 846-Lng-A-T  | 66   | chrX:73637250-73637350 |
| chrX | 73754150 | 73754250 | 901-Lng-D-T  | 88   | chrX:73754150-73754250 |
| chrX | 73843850 | 73843950 | 1223-Lng-B-T | 267  | chrX:73843850-73843950 |
| chrX | 73961850 | 73961950 | 1065-Lng-C-T | 141  | chrX:73961850-73961950 |
| chrX | 74668750 | 74668850 | 1274-Lng-A-T | 50   | chrX:74668750-74668850 |
| chrX | 74694350 | 74694450 | 1004-Lng-A-T | 209  | chrX:74694350-74694450 |
| chrX | 74704150 | 74704250 | 901-Lng-A-T  | 90   | chrX:74704150-74704250 |
| chrX | 74772850 | 74772950 | 1065-Lng-C-T | 619  | chrX:74772850-74772950 |
| chrX | 74818950 | 74819050 | 1152-Lng-A-T | 253  | chrX:74818950-74819050 |
| chrX | 74823250 | 74823350 | 1090-Lng-A-T | 45   | chrX:74823250-74823350 |
| chrX | 74845950 | 74846050 | 1100-Lng-A-T | 125  | chrX:74845950-74846050 |
| chrX | 74854950 | 74855050 | 1223-Lng-C-T | 56   | chrX:74854950-74855050 |
| chrX | 74878850 | 74878950 | 1072-Lng-A-T | 83   | chrX:74878850-74878950 |
| chrX | 74940350 | 74940450 | 901-Lng-D-T  | 105  | chrX:74940350-74940450 |
| chrX | 75028550 | 75028650 | 1004-Lng-A-T | 75   | chrX:75028550-75028650 |
| chrX | 75037750 | 75037850 | 1065-Lng-A-T | 39   | chrX:75037750-75037850 |
| chrX | 75083150 | 75083250 | 1100-Lng-A-T | 65   | chrX:75083150-75083250 |
| chrX | 75681450 | 75681550 | 901-Lng-C-T  | 46   | chrX:75681450-75681550 |
| chrX | 76143250 | 76143350 | 901-Lng-B-T  | 234  | chrX:76143250-76143350 |
| chrX | 76177950 | 76178050 | 1065-Lng-A-T | 85   | chrX:76177950-76178050 |
| chrX | 76233650 | 76233750 | 846-Lng-A-T  | 114  | chrX:76233650-76233750 |
| chrX | 76252850 | 76252950 | 1065-Lng-B-T | 103  | chrX:76252850-76252950 |
| chrX | 76329050 | 76329150 | 901-Lng-B-T  | 79   | chrX:76329050-76329150 |
| chrX | 77054450 | 77054550 | 901-Lng-A-T  | 53   | chrX:77054450-77054550 |
| chrX | 77143250 | 77143350 | 901-Lng-B-T  | 180  | chrX:77143250-77143350 |
| chrX | 77247950 | 77248050 | 1151-Lng-A-T | 75   | chrX:77247950-77248050 |
| chrX | 77286450 | 77286550 | 846-Lng-A-T  | 137  | chrX:77286450-77286550 |
| chrX | 77344350 | 77344450 | 901-Lng-A-T  | 94   | chrX:77344350-77344450 |
| chrX | 77399650 | 77399750 | 1065-Lng-B-T | 58   | chrX:77399650-77399750 |
| chrX | 77477450 | 77477550 | 901-Lng-B-T  | 187  | chrX:77477450-77477550 |
| chrX | 78309950 | 78310050 | 1223-Lng-B-T | 39   | chrX:78309950-78310050 |
| chrX | 78388150 | 78388250 | 901-Lng-C-T  | 29   | chrX:78388150-78388250 |
| chrX | 78620550 | 78620650 | 1065-Lng-B-T | 44   | chrX:78620550-78620650 |
| chrX | 78679150 | 78679250 | 1065-Lng-A-T | 86   | chrX:78679150-78679250 |
| chrX | 78783950 | 78784050 | 1072-Lng-A-T | 106  | chrX:78783950-78784050 |
| chrX | 78871650 | 78871750 | 901-Lng-C-T  | 48   | chrX:78871650-78871750 |
| chrX | 78981450 | 78981550 | 1223-Lng-B-T | 86   | chrX:78981450-78981550 |

**Table S2: SB Insertion regions**

|      |          |          |              |     |                        |
|------|----------|----------|--------------|-----|------------------------|
| chrX | 79103750 | 79103850 | 1065-Lng-A-T | 47  | chrX:79103750-79103850 |
| chrX | 79703950 | 79704050 | 1151-Lng-A-T | 55  | chrX:79703950-79704050 |
| chrX | 80035750 | 80035850 | 1100-Lng-A-T | 163 | chrX:80035750-80035850 |
| chrX | 80257250 | 80257350 | 1065-Lng-B-T | 67  | chrX:80257250-80257350 |
| chrX | 80408950 | 80409050 | 1004-Lng-A-T | 85  | chrX:80408950-80409050 |
| chrX | 80590950 | 80591050 | 1274-Lng-A-T | 55  | chrX:80590950-80591050 |
| chrX | 80706650 | 80706750 | 1004-Lng-A-T | 82  | chrX:80706650-80706750 |
| chrX | 80844750 | 80844850 | 846-Lng-A-T  | 109 | chrX:80844750-80844850 |
| chrX | 81019550 | 81019650 | 1004-Lng-A-T | 82  | chrX:81019550-81019650 |
| chrX | 81130650 | 81130750 | 1004-Lng-A-T | 50  | chrX:81130650-81130750 |
| chrX | 81419750 | 81419850 | 1223-Lng-B-T | 48  | chrX:81419750-81419850 |
| chrX | 81590750 | 81590850 | 1100-Lng-A-T | 116 | chrX:81590750-81590850 |
| chrX | 81703050 | 81703150 | 1090-Lng-B-T | 831 | chrX:81703050-81703150 |
| chrX | 81803250 | 81803350 | 1065-Lng-B-T | 53  | chrX:81803250-81803350 |
| chrX | 81876750 | 81876850 | 901-Lng-D-T  | 69  | chrX:81876750-81876850 |
| chrX | 81958450 | 81958550 | 1004-Lng-A-T | 573 | chrX:81958450-81958550 |
| chrX | 82100850 | 82100950 | 1072-Lng-A-T | 70  | chrX:82100850-82100950 |
| chrX | 82392050 | 82392150 | 1065-Lng-A-T | 40  | chrX:82392050-82392150 |
| chrX | 82830550 | 82830650 | 1167-Lng-A-T | 60  | chrX:82830550-82830650 |
| chrX | 82834050 | 82834150 | 1090-Lng-A-T | 44  | chrX:82834050-82834150 |
| chrX | 82870350 | 82870450 | 1004-Lng-A-T | 49  | chrX:82870350-82870450 |
| chrX | 82951650 | 82951750 | 1065-Lng-C-T | 232 | chrX:82951650-82951750 |
| chrX | 82983650 | 82983750 | 1090-Lng-A-T | 747 | chrX:82983650-82983750 |
| chrX | 83033450 | 83033550 | 901-Lng-B-T  | 171 | chrX:83033450-83033550 |
| chrX | 83041750 | 83041850 | 1223-Lng-B-T | 41  | chrX:83041750-83041850 |
| chrX | 83189350 | 83189450 | 1065-Lng-B-T | 47  | chrX:83189350-83189450 |
| chrX | 83231950 | 83232050 | 1065-Lng-B-T | 67  | chrX:83231950-83232050 |
| chrX | 83448050 | 83448150 | 1100-Lng-B-T | 66  | chrX:83448050-83448150 |
| chrX | 83643150 | 83643250 | 901-Lng-C-T  | 45  | chrX:83643150-83643250 |
| chrX | 83975750 | 83975850 | 1065-Lng-B-T | 53  | chrX:83975750-83975850 |
| chrX | 84224450 | 84224550 | 901-Lng-B-T  | 131 | chrX:84224450-84224550 |
| chrX | 84367850 | 84367950 | 1065-Lng-A-T | 73  | chrX:84367850-84367950 |
| chrX | 84482050 | 84482150 | 1151-Lng-A-T | 60  | chrX:84482050-84482150 |
| chrX | 84648850 | 84648950 | 1152-Lng-A-T | 150 | chrX:84648850-84648950 |
| chrX | 84701950 | 84702050 | 846-Lng-A-T  | 115 | chrX:84701950-84702050 |
| chrX | 84757350 | 84757450 | 1065-Lng-B-T | 45  | chrX:84757350-84757450 |
| chrX | 84767050 | 84767150 | 901-Lng-A-T  | 103 | chrX:84767050-84767150 |
| chrX | 84900450 | 84900550 | 1065-Lng-B-T | 65  | chrX:84900450-84900550 |
| chrX | 84922550 | 84922650 | 1004-Lng-A-T | 102 | chrX:84922550-84922650 |
| chrX | 85100450 | 85100550 | 901-Lng-C-T  | 250 | chrX:85100450-85100550 |
| chrX | 85127550 | 85127650 | 1223-Lng-A-T | 68  | chrX:85127550-85127650 |
| chrX | 85139750 | 85139850 | 1151-Lng-A-T | 79  | chrX:85139750-85139850 |
| chrX | 85237550 | 85237650 | 1065-Lng-B-T | 67  | chrX:85237550-85237650 |
| chrX | 85451950 | 85452050 | 901-Lng-B-T  | 288 | chrX:85451950-85452050 |
| chrX | 85527650 | 85527750 | 846-Lng-A-T  | 178 | chrX:85527650-85527750 |
| chrX | 85668350 | 85668450 | 1274-Lng-A-T | 78  | chrX:85668350-85668450 |



**Table S2: SB Insertion regions**

|      |          |          |              |     |                        |
|------|----------|----------|--------------|-----|------------------------|
| chrX | 85851650 | 85851750 | 901-Lng-A-T  | 440 | chrX:85851650-85851750 |
| chrX | 85864050 | 85864150 | 1167-Lng-A-T | 87  | chrX:85864050-85864150 |
| chrX | 86141650 | 86141750 | 1223-Lng-C-T | 46  | chrX:86141650-86141750 |
| chrX | 86302450 | 86302550 | 1065-Lng-B-T | 45  | chrX:86302450-86302550 |
| chrX | 86584650 | 86584750 | 1223-Lng-C-T | 47  | chrX:86584650-86584750 |
| chrX | 86602250 | 86602350 | 1152-Lng-A-T | 41  | chrX:86602250-86602350 |
| chrX | 86764650 | 86764750 | 1274-Lng-A-T | 74  | chrX:86764650-86764750 |
| chrX | 86844450 | 86844550 | 1223-Lng-C-T | 47  | chrX:86844450-86844550 |
| chrX | 86933750 | 86933850 | 1223-Lng-D-T | 45  | chrX:86933750-86933850 |
| chrX | 87088050 | 87088150 | 1004-Lng-A-T | 61  | chrX:87088050-87088150 |
| chrX | 87240450 | 87240550 | 901-Lng-A-T  | 54  | chrX:87240450-87240550 |
| chrX | 87645750 | 87645850 | 1188-Lng-A-T | 117 | chrX:87645750-87645850 |
| chrX | 88160150 | 88160250 | 901-Lng-D-T  | 197 | chrX:88160150-88160250 |
| chrX | 88332350 | 88332450 | 1100-Lng-A-T | 131 | chrX:88332350-88332450 |
| chrX | 88667850 | 88667950 | 901-Lng-A-T  | 75  | chrX:88667850-88667950 |
| chrX | 88806350 | 88806450 | 901-Lng-A-T  | 94  | chrX:88806350-88806450 |
| chrX | 88863550 | 88863650 | 1274-Lng-A-T | 66  | chrX:88863550-88863650 |
| chrX | 89443850 | 89443950 | 901-Lng-D-T  | 261 | chrX:89443850-89443950 |
| chrX | 89448450 | 89448550 | 846-Lng-A-T  | 89  | chrX:89448450-89448550 |
| chrX | 89452650 | 89452750 | 1223-Lng-B-T | 40  | chrX:89452650-89452750 |
| chrX | 89612950 | 89613050 | 901-Lng-A-T  | 145 | chrX:89612950-89613050 |
| chrX | 90274150 | 90274250 | 1274-Lng-A-T | 69  | chrX:90274150-90274250 |
| chrX | 90713350 | 90713450 | 1090-Lng-B-T | 543 | chrX:90713350-90713450 |
| chrX | 91034350 | 91034450 | 1065-Lng-A-T | 61  | chrX:91034350-91034450 |
| chrX | 91053350 | 91053450 | 1152-Lng-A-T | 110 | chrX:91053350-91053450 |
| chrX | 91158850 | 91158950 | 1065-Lng-B-T | 289 | chrX:91158850-91158950 |
| chrX | 91323150 | 91323250 | 1152-Lng-A-T | 80  | chrX:91323150-91323250 |
| chrX | 91340250 | 91340350 | 1223-Lng-B-T | 61  | chrX:91340250-91340350 |
| chrX | 91419550 | 91419650 | 1188-Lng-A-T | 50  | chrX:91419550-91419650 |
| chrX | 91725950 | 91726050 | 901-Lng-C-T  | 65  | chrX:91725950-91726050 |
| chrX | 92038050 | 92038150 | 901-Lng-C-T  | 42  | chrX:92038050-92038150 |
| chrX | 92039550 | 92039650 | 901-Lng-D-T  | 465 | chrX:92039550-92039650 |
| chrX | 92385550 | 92385650 | 1274-Lng-A-T | 51  | chrX:92385550-92385650 |
| chrX | 92704750 | 92704850 | 1223-Lng-B-T | 189 | chrX:92704750-92704850 |
| chrX | 92760850 | 92760950 | 1152-Lng-A-T | 186 | chrX:92760850-92760950 |
| chrX | 93155850 | 93155950 | 901-Lng-C-T  | 276 | chrX:93155850-93155950 |
| chrX | 93159950 | 93160050 | 1100-Lng-A-T | 180 | chrX:93159950-93160050 |
| chrX | 93299650 | 93299750 | 1274-Lng-A-T | 147 | chrX:93299650-93299750 |
| chrX | 93314250 | 93314350 | 1223-Lng-D-T | 40  | chrX:93314250-93314350 |
| chrX | 93328450 | 93328550 | 1004-Lng-A-T | 818 | chrX:93328450-93328550 |
| chrX | 93349350 | 93349450 | 1188-Lng-A-T | 210 | chrX:93349350-93349450 |
| chrX | 93372250 | 93372350 | 1065-Lng-A-T | 82  | chrX:93372250-93372350 |
| chrX | 93920350 | 93920450 | 1274-Lng-A-T | 61  | chrX:93920350-93920450 |
| chrX | 94644750 | 94644850 | 1223-Lng-D-T | 44  | chrX:94644750-94644850 |
| chrX | 95128050 | 95128150 | 1065-Lng-A-T | 943 | chrX:95128050-95128150 |
| chrX | 95145050 | 95145150 | 1065-Lng-A-T | 47  | chrX:95145050-95145150 |

**Table S2: SB Insertion regions**

|      |           |           |              |     |                          |
|------|-----------|-----------|--------------|-----|--------------------------|
| chrX | 95174250  | 95174350  | 1065-Lng-B-T | 62  | chrX:95174250-95174350   |
| chrX | 95379350  | 95379450  | 1223-Lng-A-T | 191 | chrX:95379350-95379450   |
| chrX | 95507850  | 95507950  | 1065-Lng-B-T | 69  | chrX:95507850-95507950   |
| chrX | 95764450  | 95764550  | 901-Lng-C-T  | 68  | chrX:95764450-95764550   |
| chrX | 95812250  | 95812350  | 1090-Lng-A-T | 70  | chrX:95812250-95812350   |
| chrX | 95861050  | 95861150  | 1274-Lng-A-T | 145 | chrX:95861050-95861150   |
| chrX | 96137650  | 96137750  | 1223-Lng-D-T | 78  | chrX:96137650-96137750   |
| chrX | 96729450  | 96729550  | 1065-Lng-A-T | 57  | chrX:96729450-96729550   |
| chrX | 97009950  | 97010050  | 1151-Lng-A-T | 283 | chrX:97009950-97010050   |
| chrX | 97023850  | 97023950  | 1152-Lng-A-T | 137 | chrX:97023850-97023950   |
| chrX | 97027650  | 97027750  | 901-Lng-A-T  | 83  | chrX:97027650-97027750   |
| chrX | 97421550  | 97421650  | 1004-Lng-A-T | 49  | chrX:97421550-97421650   |
| chrX | 97665150  | 97665250  | 1188-Lng-A-T | 332 | chrX:97665150-97665250   |
| chrX | 97671350  | 97671450  | 1223-Lng-C-T | 344 | chrX:97671350-97671450   |
| chrX | 97673550  | 97673650  | 1065-Lng-A-T | 94  | chrX:97673550-97673650   |
| chrX | 97815450  | 97815550  | 1274-Lng-A-T | 107 | chrX:97815450-97815550   |
| chrX | 97994750  | 97994850  | 1188-Lng-A-T | 34  | chrX:97994750-97994850   |
| chrX | 98038250  | 98038350  | 1274-Lng-A-T | 160 | chrX:98038250-98038350   |
| chrX | 98496350  | 98496450  | 1223-Lng-D-T | 40  | chrX:98496350-98496450   |
| chrX | 98604050  | 98604150  | 1167-Lng-A-T | 126 | chrX:98604050-98604150   |
| chrX | 98610350  | 98610450  | 1152-Lng-A-T | 40  | chrX:98610350-98610450   |
| chrX | 98636250  | 98636350  | 901-Lng-B-T  | 270 | chrX:98636250-98636350   |
| chrX | 98838150  | 98838250  | 901-Lng-B-T  | 72  | chrX:98838150-98838250   |
| chrX | 98840950  | 98841050  | 1274-Lng-A-T | 190 | chrX:98840950-98841050   |
| chrX | 98878950  | 98879050  | 1065-Lng-C-T | 84  | chrX:98878950-98879050   |
| chrX | 99133850  | 99133950  | 1004-Lng-A-T | 85  | chrX:99133850-99133950   |
| chrX | 99451350  | 99451450  | 1065-Lng-C-T | 114 | chrX:99451350-99451450   |
| chrX | 99499650  | 99499750  | 1223-Lng-B-T | 41  | chrX:99499650-99499750   |
| chrX | 99574150  | 99574250  | 1065-Lng-C-T | 66  | chrX:99574150-99574250   |
| chrX | 99589950  | 99590050  | 1223-Lng-D-T | 70  | chrX:99589950-99590050   |
| chrX | 99601350  | 99601450  | 1152-Lng-A-T | 53  | chrX:99601350-99601450   |
| chrX | 99688450  | 99688550  | 1065-Lng-C-T | 128 | chrX:99688450-99688550   |
| chrX | 99782350  | 99782450  | 1223-Lng-D-T | 42  | chrX:99782350-99782450   |
| chrX | 99802750  | 99802850  | 1188-Lng-A-T | 40  | chrX:99802750-99802850   |
| chrX | 100109250 | 100109350 | 1065-Lng-A-T | 40  | chrX:100109250-100109350 |
| chrX | 100409050 | 100409150 | 901-Lng-C-T  | 42  | chrX:100409050-100409150 |
| chrX | 100479550 | 100479650 | 1065-Lng-B-T | 56  | chrX:100479550-100479650 |
| chrX | 100701250 | 100701350 | 1274-Lng-A-T | 68  | chrX:100701250-100701350 |
| chrX | 100797450 | 100797550 | 1065-Lng-A-T | 54  | chrX:100797450-100797550 |
| chrX | 100815750 | 100815850 | 901-Lng-A-T  | 105 | chrX:100815750-100815850 |
| chrX | 100976550 | 100976650 | 901-Lng-B-T  | 93  | chrX:100976550-100976650 |
| chrX | 101371850 | 101371950 | 1274-Lng-A-T | 88  | chrX:101371850-101371950 |
| chrX | 101540750 | 101540850 | 1065-Lng-A-T | 52  | chrX:101540750-101540850 |
| chrX | 101546450 | 101546550 | 1004-Lng-A-T | 77  | chrX:101546450-101546550 |
| chrX | 101605550 | 101605650 | 1223-Lng-C-T | 44  | chrX:101605550-101605650 |
| chrX | 101712750 | 101712850 | 1223-Lng-C-T | 57  | chrX:101712750-101712850 |

**Table S2: SB Insertion regions**

|      |           |           |              |     |                          |
|------|-----------|-----------|--------------|-----|--------------------------|
| chrX | 102268050 | 102268150 | 1188-Lng-A-T | 53  | chrX:102268050-102268150 |
| chrX | 102291150 | 102291250 | 1223-Lng-C-T | 48  | chrX:102291150-102291250 |
| chrX | 102615250 | 102615350 | 1223-Lng-A-T | 209 | chrX:102615250-102615350 |
| chrX | 102657450 | 102657550 | 901-Lng-A-T  | 218 | chrX:102657450-102657550 |
| chrX | 103007250 | 103007350 | 1274-Lng-A-T | 71  | chrX:103007250-103007350 |
| chrX | 103029550 | 103029650 | 901-Lng-A-T  | 282 | chrX:103029550-103029650 |
| chrX | 103042650 | 103042750 | 1274-Lng-A-T | 99  | chrX:103042650-103042750 |
| chrX | 103064450 | 103064550 | 846-Lng-A-T  | 118 | chrX:103064450-103064550 |
| chrX | 103075450 | 103075550 | 1065-Lng-A-T | 37  | chrX:103075450-103075550 |
| chrX | 103085350 | 103085450 | 846-Lng-A-T  | 54  | chrX:103085350-103085450 |
| chrX | 103111150 | 103111250 | 1152-Lng-A-T | 304 | chrX:103111150-103111250 |
| chrX | 103234550 | 103234650 | 1090-Lng-B-T | 213 | chrX:103234550-103234650 |
| chrX | 103242550 | 103242650 | 1188-Lng-A-T | 43  | chrX:103242550-103242650 |
| chrX | 103813250 | 103813350 | 901-Lng-C-T  | 207 | chrX:103813250-103813350 |
| chrX | 103895650 | 103895750 | 1004-Lng-A-T | 144 | chrX:103895650-103895750 |
| chrX | 104296150 | 104296250 | 1223-Lng-A-T | 142 | chrX:104296150-104296250 |
| chrX | 104454250 | 104454350 | 1065-Lng-B-T | 53  | chrX:104454250-104454350 |
| chrX | 104691350 | 104691450 | 1152-Lng-A-T | 73  | chrX:104691350-104691450 |
| chrX | 105026150 | 105026250 | 1274-Lng-A-T | 166 | chrX:105026150-105026250 |
| chrX | 105058150 | 105058250 | 901-Lng-A-T  | 83  | chrX:105058150-105058250 |
| chrX | 105206250 | 105206350 | 1065-Lng-A-T | 57  | chrX:105206250-105206350 |
| chrX | 105683450 | 105683550 | 1065-Lng-B-T | 56  | chrX:105683450-105683550 |
| chrX | 105741650 | 105741750 | 1065-Lng-C-T | 62  | chrX:105741650-105741750 |
| chrX | 105743450 | 105743550 | 1065-Lng-B-T | 58  | chrX:105743450-105743550 |
| chrX | 105975350 | 105975450 | 846-Lng-A-T  | 189 | chrX:105975350-105975450 |
| chrX | 105996850 | 105996950 | 1223-Lng-A-T | 186 | chrX:105996850-105996950 |
| chrX | 106075750 | 106075850 | 1065-Lng-B-T | 72  | chrX:106075750-106075850 |
| chrX | 106160650 | 106160750 | 846-Lng-A-T  | 113 | chrX:106160650-106160750 |
| chrX | 106303250 | 106303350 | 1151-Lng-A-T | 55  | chrX:106303250-106303350 |
| chrX | 106665850 | 106665950 | 1004-Lng-A-T | 73  | chrX:106665850-106665950 |
| chrX | 106785650 | 106785750 | 901-Lng-D-T  | 536 | chrX:106785650-106785750 |
| chrX | 106862950 | 106863050 | 901-Lng-D-T  | 198 | chrX:106862950-106863050 |
| chrX | 106913150 | 106913250 | 1065-Lng-C-T | 63  | chrX:106913150-106913250 |
| chrX | 107172750 | 107172850 | 1004-Lng-A-T | 114 | chrX:107172750-107172850 |
| chrX | 107199850 | 107199950 | 1152-Lng-A-T | 180 | chrX:107199850-107199950 |
| chrX | 107603450 | 107603550 | 1065-Lng-A-T | 88  | chrX:107603450-107603550 |
| chrX | 107637650 | 107637750 | 1065-Lng-C-T | 109 | chrX:107637650-107637750 |
| chrX | 107888450 | 107888550 | 1223-Lng-C-T | 62  | chrX:107888450-107888550 |
| chrX | 107955250 | 107955350 | 1152-Lng-A-T | 97  | chrX:107955250-107955350 |
| chrX | 107958650 | 107958750 | 1065-Lng-A-T | 44  | chrX:107958650-107958750 |
| chrX | 107987350 | 107987450 | 1065-Lng-A-T | 56  | chrX:107987350-107987450 |
| chrX | 108105150 | 108105250 | 846-Lng-A-T  | 157 | chrX:108105150-108105250 |
| chrX | 108207650 | 108207750 | 1065-Lng-B-T | 42  | chrX:108207650-108207750 |
| chrX | 108519150 | 108519250 | 1274-Lng-A-T | 179 | chrX:108519150-108519250 |
| chrX | 108519250 | 108519350 | 1004-Lng-A-T | 417 | chrX:108519250-108519350 |
| chrX | 108608450 | 108608550 | 1065-Lng-B-T | 51  | chrX:108608450-108608550 |

**Table S2: SB Insertion regions**

|      |           |           |              |      |                          |
|------|-----------|-----------|--------------|------|--------------------------|
| chrX | 108827450 | 108827550 | 901-Lng-A-T  | 244  | chrX:108827450-108827550 |
| chrX | 108873650 | 108873750 | 901-Lng-B-T  | 44   | chrX:108873650-108873750 |
| chrX | 108903550 | 108903650 | 1152-Lng-A-T | 44   | chrX:108903550-108903650 |
| chrX | 109158450 | 109158550 | 1223-Lng-C-T | 71   | chrX:109158450-109158550 |
| chrX | 109409750 | 109409850 | 1223-Lng-A-T | 98   | chrX:109409750-109409850 |
| chrX | 109430050 | 109430150 | 1065-Lng-A-T | 69   | chrX:109430050-109430150 |
| chrX | 109517950 | 109518050 | 1065-Lng-B-T | 41   | chrX:109517950-109518050 |
| chrX | 109631650 | 109631750 | 1065-Lng-B-T | 46   | chrX:109631650-109631750 |
| chrX | 109749650 | 109749750 | 901-Lng-D-T  | 283  | chrX:109749650-109749750 |
| chrX | 109750750 | 109750850 | 1065-Lng-B-T | 55   | chrX:109750750-109750850 |
| chrX | 109930150 | 109930250 | 1152-Lng-A-T | 73   | chrX:109930150-109930250 |
| chrX | 110252950 | 110253050 | 901-Lng-A-T  | 57   | chrX:110252950-110253050 |
| chrX | 110291850 | 110291950 | 1100-Lng-A-T | 55   | chrX:110291850-110291950 |
| chrX | 110825350 | 110825450 | 1188-Lng-A-T | 154  | chrX:110825350-110825450 |
| chrX | 110865950 | 110866050 | 901-Lng-B-T  | 40   | chrX:110865950-110866050 |
| chrX | 110958450 | 110958550 | 901-Lng-A-T  | 104  | chrX:110958450-110958550 |
| chrX | 110985350 | 110985450 | 1152-Lng-A-T | 68   | chrX:110985350-110985450 |
| chrX | 110993950 | 110994050 | 1065-Lng-B-T | 120  | chrX:110993950-110994050 |
| chrX | 111029950 | 111030050 | 846-Lng-A-T  | 1003 | chrX:111029950-111030050 |
| chrX | 111552550 | 111552650 | 1223-Lng-B-T | 74   | chrX:111552550-111552650 |
| chrX | 111609550 | 111609650 | 1065-Lng-B-T | 80   | chrX:111609550-111609650 |
| chrX | 111677150 | 111677250 | 1151-Lng-A-T | 143  | chrX:111677150-111677250 |
| chrX | 111681850 | 111681950 | 1065-Lng-B-T | 56   | chrX:111681850-111681950 |
| chrX | 111828750 | 111828850 | 1100-Lng-A-T | 136  | chrX:111828750-111828850 |
| chrX | 112063150 | 112063250 | 1065-Lng-A-T | 99   | chrX:112063150-112063250 |
| chrX | 112066650 | 112066750 | 901-Lng-A-T  | 117  | chrX:112066650-112066750 |
| chrX | 112480150 | 112480250 | 1065-Lng-B-T | 169  | chrX:112480150-112480250 |
| chrX | 112794650 | 112794750 | 1274-Lng-A-T | 231  | chrX:112794650-112794750 |
| chrX | 113162350 | 113162450 | 1065-Lng-B-T | 48   | chrX:113162350-113162450 |
| chrX | 113163150 | 113163250 | 1223-Lng-D-T | 41   | chrX:113163150-113163250 |
| chrX | 113236150 | 113236250 | 846-Lng-A-T  | 132  | chrX:113236150-113236250 |
| chrX | 113334450 | 113334550 | 1152-Lng-A-T | 174  | chrX:113334450-113334550 |
| chrX | 113647350 | 113647450 | 1065-Lng-C-T | 81   | chrX:113647350-113647450 |
| chrX | 113743450 | 113743550 | 901-Lng-D-T  | 445  | chrX:113743450-113743550 |
| chrX | 113762450 | 113762550 | 1223-Lng-B-T | 364  | chrX:113762450-113762550 |
| chrX | 113848550 | 113848650 | 1223-Lng-C-T | 60   | chrX:113848550-113848650 |
| chrX | 114411550 | 114411650 | 1152-Lng-A-T | 73   | chrX:114411550-114411650 |
| chrX | 114653050 | 114653150 | 901-Lng-B-T  | 113  | chrX:114653050-114653150 |
| chrX | 114679350 | 114679450 | 901-Lng-A-T  | 315  | chrX:114679350-114679450 |
| chrX | 114920150 | 114920250 | 1065-Lng-A-T | 44   | chrX:114920150-114920250 |
| chrX | 115134050 | 115134150 | 1004-Lng-A-T | 70   | chrX:115134050-115134150 |
| chrX | 115397450 | 115397550 | 1065-Lng-B-T | 72   | chrX:115397450-115397550 |
| chrX | 115415250 | 115415350 | 1223-Lng-B-T | 51   | chrX:115415250-115415350 |
| chrX | 115510650 | 115510750 | 1152-Lng-A-T | 76   | chrX:115510650-115510750 |
| chrX | 115979850 | 115979950 | 901-Lng-D-T  | 511  | chrX:115979850-115979950 |
| chrX | 116128350 | 116128450 | 1223-Lng-B-T | 120  | chrX:116128350-116128450 |

**Table S2: SB Insertion regions**

|      |           |           |              |     |                          |
|------|-----------|-----------|--------------|-----|--------------------------|
| chrX | 116139650 | 116139750 | 901-Lng-B-T  | 57  | chrX:116139650-116139750 |
| chrX | 116163150 | 116163250 | 1223-Lng-D-T | 54  | chrX:116163150-116163250 |
| chrX | 116173050 | 116173150 | 1223-Lng-B-T | 43  | chrX:116173050-116173150 |
| chrX | 116174150 | 116174250 | 1223-Lng-C-T | 48  | chrX:116174150-116174250 |
| chrX | 116324450 | 116324550 | 1065-Lng-C-T | 84  | chrX:116324450-116324550 |
| chrX | 116539050 | 116539150 | 901-Lng-C-T  | 48  | chrX:116539050-116539150 |
| chrX | 116552850 | 116552950 | 846-Lng-A-T  | 52  | chrX:116552850-116552950 |
| chrX | 116593650 | 116593750 | 1152-Lng-A-T | 110 | chrX:116593650-116593750 |
| chrX | 116840250 | 116840350 | 1152-Lng-A-T | 94  | chrX:116840250-116840350 |
| chrX | 116871750 | 116871850 | 1223-Lng-C-T | 49  | chrX:116871750-116871850 |
| chrX | 116918850 | 116918950 | 1188-Lng-A-T | 53  | chrX:116918850-116918950 |
| chrX | 117143550 | 117143650 | 901-Lng-A-T  | 72  | chrX:117143550-117143650 |
| chrX | 117373650 | 117373750 | 1223-Lng-B-T | 34  | chrX:117373650-117373750 |
| chrX | 117450850 | 117450950 | 1151-Lng-A-T | 71  | chrX:117450850-117450950 |
| chrX | 117617450 | 117617550 | 1151-Lng-A-T | 431 | chrX:117617450-117617550 |
| chrX | 117902450 | 117902550 | 1065-Lng-A-T | 51  | chrX:117902450-117902550 |
| chrX | 118085550 | 118085650 | 846-Lng-A-T  | 46  | chrX:118085550-118085650 |
| chrX | 118113150 | 118113250 | 901-Lng-C-T  | 35  | chrX:118113150-118113250 |
| chrX | 118577350 | 118577450 | 1167-Lng-A-T | 53  | chrX:118577350-118577450 |
| chrX | 118587050 | 118587150 | 1152-Lng-A-T | 68  | chrX:118587050-118587150 |
| chrX | 118994850 | 118994950 | 1090-Lng-B-T | 678 | chrX:118994850-118994950 |
| chrX | 119116050 | 119116150 | 1065-Lng-C-T | 74  | chrX:119116050-119116150 |
| chrX | 119247550 | 119247650 | 1065-Lng-B-T | 77  | chrX:119247550-119247650 |
| chrX | 119337650 | 119337750 | 1090-Lng-A-T | 78  | chrX:119337650-119337750 |
| chrX | 119419250 | 119419350 | 1065-Lng-A-T | 322 | chrX:119419250-119419350 |
| chrX | 119491450 | 119491550 | 901-Lng-A-T  | 121 | chrX:119491450-119491550 |
| chrX | 120023150 | 120023250 | 901-Lng-C-T  | 35  | chrX:120023150-120023250 |
| chrX | 120122150 | 120122250 | 1065-Lng-A-T | 40  | chrX:120122150-120122250 |
| chrX | 120124950 | 120125050 | 1100-Lng-A-T | 77  | chrX:120124950-120125050 |
| chrX | 120762350 | 120762450 | 1090-Lng-A-T | 54  | chrX:120762350-120762450 |
| chrX | 120777050 | 120777150 | 1090-Lng-A-T | 54  | chrX:120777050-120777150 |
| chrX | 120777050 | 120777150 | 1167-Lng-A-T | 54  | chrX:120777050-120777150 |
| chrX | 121274950 | 121275050 | 1004-Lng-A-T | 322 | chrX:121274950-121275050 |
| chrX | 121292150 | 121292250 | 1072-Lng-A-T | 255 | chrX:121292150-121292250 |
| chrX | 121298550 | 121298650 | 1167-Lng-A-T | 60  | chrX:121298550-121298650 |
| chrX | 121298550 | 121298650 | 1274-Lng-A-T | 80  | chrX:121298550-121298650 |
| chrX | 121311250 | 121311350 | 1152-Lng-A-T | 296 | chrX:121311250-121311350 |
| chrX | 121311250 | 121311350 | 1152-Lng-A-T | 89  | chrX:121311250-121311350 |
| chrX | 122966750 | 122966850 | 1065-Lng-A-T | 78  | chrX:122966750-122966850 |
| chrX | 122995550 | 122995650 | 1065-Lng-A-T | 723 | chrX:122995550-122995650 |
| chrX | 122998050 | 122998150 | 1188-Lng-A-T | 97  | chrX:122998050-122998150 |
| chrX | 123955350 | 123955450 | 1065-Lng-A-T | 79  | chrX:123955350-123955450 |
| chrX | 124037950 | 124038050 | 1065-Lng-A-T | 91  | chrX:124037950-124038050 |
| chrX | 124377450 | 124377550 | 901-Lng-C-T  | 43  | chrX:124377450-124377550 |
| chrX | 124453350 | 124453450 | 1065-Lng-B-T | 386 | chrX:124453350-124453450 |
| chrX | 124582050 | 124582150 | 1100-Lng-A-T | 99  | chrX:124582050-124582150 |

**Table S2: SB Insertion regions**

|      |           |           |              |      |                          |
|------|-----------|-----------|--------------|------|--------------------------|
| chrX | 124814350 | 124814450 | 846-Lng-A-T  | 144  | chrX:124814350-124814450 |
| chrX | 124873650 | 124873750 | 846-Lng-A-T  | 75   | chrX:124873650-124873750 |
| chrX | 124908850 | 124908950 | 901-Lng-D-T  | 38   | chrX:124908850-124908950 |
| chrX | 124963150 | 124963250 | 1065-Lng-B-T | 111  | chrX:124963150-124963250 |
| chrX | 125065650 | 125065750 | 1065-Lng-A-T | 61   | chrX:125065650-125065750 |
| chrX | 125091950 | 125092050 | 1065-Lng-C-T | 71   | chrX:125091950-125092050 |
| chrX | 125105550 | 125105650 | 901-Lng-D-T  | 1019 | chrX:125105550-125105650 |
| chrX | 125832050 | 125832150 | 901-Lng-D-T  | 140  | chrX:125832050-125832150 |
| chrX | 125885650 | 125885750 | 1274-Lng-A-T | 90   | chrX:125885650-125885750 |
| chrX | 126093650 | 126093750 | 1065-Lng-C-T | 74   | chrX:126093650-126093750 |
| chrX | 126364450 | 126364550 | 1223-Lng-A-T | 204  | chrX:126364450-126364550 |
| chrX | 126399350 | 126399450 | 1223-Lng-A-T | 140  | chrX:126399350-126399450 |
| chrX | 126400150 | 126400250 | 1100-Lng-A-T | 63   | chrX:126400150-126400250 |
| chrX | 126450650 | 126450750 | 901-Lng-B-T  | 106  | chrX:126450650-126450750 |
| chrX | 126597250 | 126597350 | 1223-Lng-C-T | 67   | chrX:126597250-126597350 |
| chrX | 126664850 | 126664950 | 1223-Lng-B-T | 49   | chrX:126664850-126664950 |
| chrX | 126695950 | 126696050 | 1065-Lng-C-T | 1545 | chrX:126695950-126696050 |
| chrX | 126731450 | 126731550 | 1065-Lng-B-T | 59   | chrX:126731450-126731550 |
| chrX | 126779450 | 126779550 | 846-Lng-A-T  | 337  | chrX:126779450-126779550 |
| chrX | 126811850 | 126811950 | 1090-Lng-A-T | 834  | chrX:126811850-126811950 |
| chrX | 126876350 | 126876450 | 1065-Lng-A-T | 96   | chrX:126876350-126876450 |
| chrX | 126963450 | 126963550 | 1065-Lng-B-T | 53   | chrX:126963450-126963550 |
| chrX | 126967350 | 126967450 | 1090-Lng-A-T | 53   | chrX:126967350-126967450 |
| chrX | 126988150 | 126988250 | 1065-Lng-A-T | 89   | chrX:126988150-126988250 |
| chrX | 127210450 | 127210550 | 1223-Lng-A-T | 94   | chrX:127210450-127210550 |
| chrX | 127603050 | 127603150 | 1004-Lng-A-T | 115  | chrX:127603050-127603150 |
| chrX | 127730950 | 127731050 | 846-Lng-A-T  | 170  | chrX:127730950-127731050 |
| chrX | 127735150 | 127735250 | 901-Lng-C-T  | 75   | chrX:127735150-127735250 |
| chrX | 127758550 | 127758650 | 1223-Lng-C-T | 53   | chrX:127758550-127758650 |
| chrX | 127798450 | 127798550 | 901-Lng-A-T  | 83   | chrX:127798450-127798550 |
| chrX | 127862250 | 127862350 | 901-Lng-A-T  | 52   | chrX:127862250-127862350 |
| chrX | 127927150 | 127927250 | 846-Lng-A-T  | 86   | chrX:127927150-127927250 |
| chrX | 127972950 | 127973050 | 1090-Lng-A-T | 93   | chrX:127972950-127973050 |
| chrX | 128126250 | 128126350 | 1223-Lng-B-T | 176  | chrX:128126250-128126350 |
| chrX | 128308850 | 128308950 | 1152-Lng-A-T | 34   | chrX:128308850-128308950 |
| chrX | 128371750 | 128371850 | 846-Lng-A-T  | 50   | chrX:128371750-128371850 |
| chrX | 128556750 | 128556850 | 1167-Lng-A-T | 63   | chrX:128556750-128556850 |
| chrX | 128635350 | 128635450 | 1223-Lng-B-T | 82   | chrX:128635350-128635450 |
| chrX | 128996350 | 128996450 | 1274-Lng-A-T | 112  | chrX:128996350-128996450 |
| chrX | 129289350 | 129289450 | 901-Lng-B-T  | 38   | chrX:129289350-129289450 |
| chrX | 129344850 | 129344950 | 901-Lng-C-T  | 41   | chrX:129344850-129344950 |
| chrX | 129387850 | 129387950 | 901-Lng-B-T  | 86   | chrX:129387850-129387950 |
| chrX | 129696950 | 129697050 | 1065-Lng-B-T | 50   | chrX:129696950-129697050 |
| chrX | 129729850 | 129729950 | 1065-Lng-C-T | 62   | chrX:129729850-129729950 |
| chrX | 129893850 | 129893950 | 1065-Lng-C-T | 67   | chrX:129893850-129893950 |
| chrX | 130013650 | 130013750 | 1223-Lng-D-T | 65   | chrX:130013650-130013750 |

**Table S2: SB Insertion regions**

|      |           |           |              |      |                          |
|------|-----------|-----------|--------------|------|--------------------------|
| chrX | 130151850 | 130151950 | 1223-Lng-A-T | 200  | chrX:130151850-130151950 |
| chrX | 130188950 | 130189050 | 901-Lng-C-T  | 35   | chrX:130188950-130189050 |
| chrX | 130229450 | 130229550 | 901-Lng-A-T  | 56   | chrX:130229450-130229550 |
| chrX | 130710150 | 130710250 | 1223-Lng-A-T | 88   | chrX:130710150-130710250 |
| chrX | 130867350 | 130867450 | 1065-Lng-A-T | 101  | chrX:130867350-130867450 |
| chrX | 130871650 | 130871750 | 1223-Lng-B-T | 257  | chrX:130871650-130871750 |
| chrX | 131053550 | 131053650 | 1065-Lng-B-T | 40   | chrX:131053550-131053650 |
| chrX | 131177150 | 131177250 | 901-Lng-D-T  | 328  | chrX:131177150-131177250 |
| chrX | 131536350 | 131536450 | 1223-Lng-B-T | 50   | chrX:131536350-131536450 |
| chrX | 132543350 | 132543450 | 1065-Lng-A-T | 108  | chrX:132543350-132543450 |
| chrX | 133060650 | 133060750 | 1004-Lng-A-T | 119  | chrX:133060650-133060750 |
| chrX | 133090050 | 133090150 | 1065-Lng-B-T | 63   | chrX:133090050-133090150 |
| chrX | 133310650 | 133310750 | 1004-Lng-A-T | 118  | chrX:133310650-133310750 |
| chrX | 133562250 | 133562350 | 901-Lng-D-T  | 39   | chrX:133562250-133562350 |
| chrX | 133563250 | 133563350 | 901-Lng-B-T  | 302  | chrX:133563250-133563350 |
| chrX | 134203550 | 134203650 | 1065-Lng-B-T | 658  | chrX:134203550-134203650 |
| chrX | 134365550 | 134365650 | 1065-Lng-C-T | 82   | chrX:134365550-134365650 |
| chrX | 134402650 | 134402750 | 901-Lng-B-T  | 163  | chrX:134402650-134402750 |
| chrX | 134409850 | 134409950 | 901-Lng-B-T  | 185  | chrX:134409850-134409950 |
| chrX | 134610350 | 134610450 | 1065-Lng-B-T | 93   | chrX:134610350-134610450 |
| chrX | 134769450 | 134769550 | 901-Lng-C-T  | 87   | chrX:134769450-134769550 |
| chrX | 134967350 | 134967450 | 1188-Lng-A-T | 37   | chrX:134967350-134967450 |
| chrX | 134981250 | 134981350 | 1152-Lng-A-T | 248  | chrX:134981250-134981350 |
| chrX | 135063050 | 135063150 | 1100-Lng-A-T | 169  | chrX:135063050-135063150 |
| chrX | 135265850 | 135265950 | 1065-Lng-B-T | 255  | chrX:135265850-135265950 |
| chrX | 135370350 | 135370450 | 901-Lng-A-T  | 139  | chrX:135370350-135370450 |
| chrX | 135543450 | 135543550 | 1151-Lng-A-T | 85   | chrX:135543450-135543550 |
| chrX | 135692850 | 135692950 | 1090-Lng-A-T | 91   | chrX:135692850-135692950 |
| chrX | 135864350 | 135864450 | 1223-Lng-A-T | 163  | chrX:135864350-135864450 |
| chrX | 135899050 | 135899150 | 1223-Lng-C-T | 50   | chrX:135899050-135899150 |
| chrX | 135905750 | 135905850 | 1100-Lng-B-T | 7152 | chrX:135905750-135905850 |
| chrX | 136125950 | 136126050 | 1223-Lng-C-T | 51   | chrX:136125950-136126050 |
| chrX | 136373750 | 136373850 | 1004-Lng-A-T | 82   | chrX:136373750-136373850 |
| chrX | 136426450 | 136426550 | 901-Lng-A-T  | 64   | chrX:136426450-136426550 |
| chrX | 136541750 | 136541850 | 901-Lng-B-T  | 135  | chrX:136541750-136541850 |
| chrX | 136629950 | 136630050 | 1065-Lng-A-T | 345  | chrX:136629950-136630050 |
| chrX | 136715250 | 136715350 | 1274-Lng-A-T | 174  | chrX:136715250-136715350 |
| chrX | 136775450 | 136775550 | 1274-Lng-A-T | 152  | chrX:136775450-136775550 |
| chrX | 136995450 | 136995550 | 1090-Lng-B-T | 134  | chrX:136995450-136995550 |
| chrX | 137062850 | 137062950 | 1151-Lng-A-T | 89   | chrX:137062850-137062950 |
| chrX | 137220850 | 137220950 | 1274-Lng-A-T | 185  | chrX:137220850-137220950 |
| chrX | 137520050 | 137520150 | 1090-Lng-A-T | 1034 | chrX:137520050-137520150 |
| chrX | 137742750 | 137742850 | 901-Lng-C-T  | 47   | chrX:137742750-137742850 |
| chrX | 137810850 | 137810950 | 1152-Lng-A-T | 75   | chrX:137810850-137810950 |
| chrX | 137910750 | 137910850 | 1274-Lng-A-T | 58   | chrX:137910750-137910850 |
| chrX | 137911350 | 137911450 | 1090-Lng-A-T | 103  | chrX:137911350-137911450 |

**Table S2: SB Insertion regions**

|      |           |           |              |      |                          |
|------|-----------|-----------|--------------|------|--------------------------|
| chrX | 137918550 | 137918650 | 846-Lng-A-T  | 70   | chrX:137918550-137918650 |
| chrX | 137923150 | 137923250 | 1090-Lng-B-T | 382  | chrX:137923150-137923250 |
| chrX | 138080650 | 138080750 | 1065-Lng-B-T | 50   | chrX:138080650-138080750 |
| chrX | 138183650 | 138183750 | 1152-Lng-A-T | 93   | chrX:138183650-138183750 |
| chrX | 138747550 | 138747650 | 1188-Lng-A-T | 59   | chrX:138747550-138747650 |
| chrX | 138751850 | 138751950 | 901-Lng-A-T  | 86   | chrX:138751850-138751950 |
| chrX | 138822950 | 138823050 | 1152-Lng-A-T | 180  | chrX:138822950-138823050 |
| chrX | 138929450 | 138929550 | 1223-Lng-D-T | 52   | chrX:138929450-138929550 |
| chrX | 138932850 | 138932950 | 1223-Lng-C-T | 201  | chrX:138932850-138932950 |
| chrX | 139007750 | 139007850 | 1065-Lng-A-T | 79   | chrX:139007750-139007850 |
| chrX | 139080650 | 139080750 | 901-Lng-A-T  | 99   | chrX:139080650-139080750 |
| chrX | 139114650 | 139114750 | 1167-Lng-A-T | 47   | chrX:139114650-139114750 |
| chrX | 139204950 | 139205050 | 1100-Lng-A-T | 127  | chrX:139204950-139205050 |
| chrX | 139328450 | 139328550 | 1065-Lng-C-T | 100  | chrX:139328450-139328550 |
| chrX | 139533650 | 139533750 | 1223-Lng-A-T | 704  | chrX:139533650-139533750 |
| chrX | 139556250 | 139556350 | 901-Lng-A-T  | 60   | chrX:139556250-139556350 |
| chrX | 139711650 | 139711750 | 1223-Lng-A-T | 1613 | chrX:139711650-139711750 |
| chrX | 139833150 | 139833250 | 901-Lng-D-T  | 667  | chrX:139833150-139833250 |
| chrX | 139846350 | 139846450 | 846-Lng-A-T  | 48   | chrX:139846350-139846450 |
| chrX | 139917550 | 139917650 | 846-Lng-A-T  | 309  | chrX:139917550-139917650 |
| chrX | 139917550 | 139917650 | 1065-Lng-A-T | 50   | chrX:139917550-139917650 |
| chrX | 139917550 | 139917650 | 1100-Lng-A-T | 51   | chrX:139917550-139917650 |
| chrX | 139917550 | 139917650 | 1072-Lng-A-T | 108  | chrX:139917550-139917650 |
| chrX | 139917550 | 139917650 | 1065-Lng-B-T | 381  | chrX:139917550-139917650 |
| chrX | 139917550 | 139917650 | 1274-Lng-A-T | 98   | chrX:139917550-139917650 |
| chrX | 139917550 | 139917650 | 901-Lng-B-T  | 73   | chrX:139917550-139917650 |
| chrX | 139917550 | 139917650 | 901-Lng-C-T  | 74   | chrX:139917550-139917650 |
| chrX | 139917550 | 139917650 | 1004-Lng-A-T | 441  | chrX:139917550-139917650 |
| chrX | 139917550 | 139917650 | 1100-Lng-B-T | 436  | chrX:139917550-139917650 |
| chrX | 139917550 | 139917650 | 1090-Lng-A-T | 496  | chrX:139917550-139917650 |
| chrX | 139917550 | 139917650 | 1100-Lng-A-T | 63   | chrX:139917550-139917650 |
| chrX | 139917550 | 139917650 | 1223-Lng-D-T | 51   | chrX:139917550-139917650 |
| chrX | 139917550 | 139917650 | 1065-Lng-B-T | 94   | chrX:139917550-139917650 |
| chrX | 139917550 | 139917650 | 901-Lng-A-T  | 104  | chrX:139917550-139917650 |
| chrX | 139917550 | 139917650 | 1152-Lng-A-T | 494  | chrX:139917550-139917650 |
| chrX | 139917550 | 139917650 | 1065-Lng-C-T | 278  | chrX:139917550-139917650 |
| chrX | 139917550 | 139917650 | 1004-Lng-A-T | 160  | chrX:139917550-139917650 |
| chrX | 139917550 | 139917650 | 1100-Lng-B-T | 52   | chrX:139917550-139917650 |
| chrX | 139917550 | 139917650 | 901-Lng-C-T  | 96   | chrX:139917550-139917650 |
| chrX | 139917550 | 139917650 | 1090-Lng-A-T | 60   | chrX:139917550-139917650 |
| chrX | 139965350 | 139965450 | 901-Lng-B-T  | 140  | chrX:139965350-139965450 |
| chrX | 139970050 | 139970150 | 1100-Lng-A-T | 114  | chrX:139970050-139970150 |
| chrX | 140007850 | 140007950 | 1223-Lng-B-T | 109  | chrX:140007850-140007950 |
| chrX | 140081150 | 140081250 | 1223-Lng-A-T | 186  | chrX:140081150-140081250 |
| chrX | 140266250 | 140266350 | 1223-Lng-A-T | 90   | chrX:140266250-140266350 |
| chrX | 140334450 | 140334550 | 1065-Lng-B-T | 69   | chrX:140334450-140334550 |



**Table S2: SB Insertion regions**

|      |           |           |              |      |                          |
|------|-----------|-----------|--------------|------|--------------------------|
| chrX | 140480150 | 140480250 | 1090-Lng-B-T | 166  | chrX:140480150-140480250 |
| chrX | 140507550 | 140507650 | 846-Lng-A-T  | 110  | chrX:140507550-140507650 |
| chrX | 140638250 | 140638350 | 901-Lng-C-T  | 56   | chrX:140638250-140638350 |
| chrX | 140696950 | 140697050 | 846-Lng-A-T  | 142  | chrX:140696950-140697050 |
| chrX | 141183550 | 141183650 | 1065-Lng-A-T | 75   | chrX:141183550-141183650 |
| chrX | 141279050 | 141279150 | 901-Lng-C-T  | 34   | chrX:141279050-141279150 |
| chrX | 141324050 | 141324150 | 1065-Lng-B-T | 91   | chrX:141324050-141324150 |
| chrX | 141550550 | 141550650 | 901-Lng-B-T  | 211  | chrX:141550550-141550650 |
| chrX | 141555850 | 141555950 | 1004-Lng-A-T | 87   | chrX:141555850-141555950 |
| chrX | 141612450 | 141612550 | 1004-Lng-A-T | 77   | chrX:141612450-141612550 |
| chrX | 141687050 | 141687150 | 901-Lng-B-T  | 149  | chrX:141687050-141687150 |
| chrX | 141723550 | 141723650 | 901-Lng-C-T  | 49   | chrX:141723550-141723650 |
| chrX | 142071750 | 142071850 | 1223-Lng-A-T | 75   | chrX:142071750-142071850 |
| chrX | 142089550 | 142089650 | 1072-Lng-A-T | 57   | chrX:142089550-142089650 |
| chrX | 142267550 | 142267650 | 1223-Lng-A-T | 2117 | chrX:142267550-142267650 |
| chrX | 142558150 | 142558250 | 846-Lng-A-T  | 45   | chrX:142558150-142558250 |
| chrX | 142599550 | 142599650 | 901-Lng-C-T  | 55   | chrX:142599550-142599650 |
| chrX | 143177950 | 143178050 | 901-Lng-B-T  | 158  | chrX:143177950-143178050 |
| chrX | 143347350 | 143347450 | 901-Lng-D-T  | 58   | chrX:143347350-143347450 |
| chrX | 143351750 | 143351850 | 1152-Lng-A-T | 52   | chrX:143351750-143351850 |
| chrX | 143835650 | 143835750 | 1065-Lng-B-T | 51   | chrX:143835650-143835750 |
| chrX | 144129550 | 144129650 | 1151-Lng-A-T | 326  | chrX:144129550-144129650 |
| chrX | 144149450 | 144149550 | 1188-Lng-A-T | 111  | chrX:144149450-144149550 |
| chrX | 146718550 | 146718650 | 1274-Lng-A-T | 137  | chrX:146718550-146718650 |
| chrX | 146835950 | 146836050 | 901-Lng-A-T  | 58   | chrX:146835950-146836050 |
| chrX | 147013750 | 147013850 | 901-Lng-D-T  | 77   | chrX:147013750-147013850 |
| chrX | 147427250 | 147427350 | 1223-Lng-C-T | 48   | chrX:147427250-147427350 |
| chrX | 147781550 | 147781650 | 1151-Lng-A-T | 211  | chrX:147781550-147781650 |
| chrX | 147785150 | 147785250 | 1223-Lng-B-T | 39   | chrX:147785150-147785250 |
| chrX | 147793550 | 147793650 | 1223-Lng-D-T | 46   | chrX:147793550-147793650 |
| chrX | 148008250 | 148008350 | 901-Lng-A-T  | 101  | chrX:148008250-148008350 |
| chrX | 148020050 | 148020150 | 1274-Lng-A-T | 74   | chrX:148020050-148020150 |
| chrX | 148201550 | 148201650 | 1090-Lng-A-T | 53   | chrX:148201550-148201650 |
| chrX | 148262950 | 148263050 | 1065-Lng-A-T | 57   | chrX:148262950-148263050 |
| chrX | 148269550 | 148269650 | 901-Lng-B-T  | 124  | chrX:148269550-148269650 |
| chrX | 148327150 | 148327250 | 1223-Lng-B-T | 263  | chrX:148327150-148327250 |
| chrX | 148584750 | 148584850 | 1100-Lng-A-T | 247  | chrX:148584750-148584850 |
| chrX | 148828750 | 148828850 | 901-Lng-C-T  | 62   | chrX:148828750-148828850 |
| chrX | 149088850 | 149088950 | 1274-Lng-A-T | 215  | chrX:149088850-149088950 |
| chrX | 149105650 | 149105750 | 1100-Lng-A-T | 98   | chrX:149105650-149105750 |
| chrX | 149107350 | 149107450 | 901-Lng-B-T  | 115  | chrX:149107350-149107450 |
| chrX | 149142850 | 149142950 | 1004-Lng-A-T | 56   | chrX:149142850-149142950 |
| chrX | 149161750 | 149161850 | 1065-Lng-B-T | 58   | chrX:149161750-149161850 |
| chrX | 149230350 | 149230450 | 1223-Lng-B-T | 417  | chrX:149230350-149230450 |
| chrX | 149618750 | 149618850 | 1090-Lng-B-T | 120  | chrX:149618750-149618850 |
| chrX | 149739350 | 149739450 | 901-Lng-B-T  | 93   | chrX:149739350-149739450 |

**Table S2: SB Insertion regions**

|      |           |           |              |     |                          |
|------|-----------|-----------|--------------|-----|--------------------------|
| chrX | 150184450 | 150184550 | 1223-Lng-C-T | 60  | chrX:150184450-150184550 |
| chrX | 150670750 | 150670850 | 1223-Lng-D-T | 40  | chrX:150670750-150670850 |
| chrX | 150727350 | 150727450 | 1090-Lng-A-T | 69  | chrX:150727350-150727450 |
| chrX | 150953850 | 150953950 | 1090-Lng-A-T | 122 | chrX:150953850-150953950 |
| chrX | 151368050 | 151368150 | 901-Lng-A-T  | 175 | chrX:151368050-151368150 |
| chrX | 151779550 | 151779650 | 1223-Lng-D-T | 60  | chrX:151779550-151779650 |
| chrX | 151844450 | 151844550 | 901-Lng-A-T  | 51  | chrX:151844450-151844550 |
| chrX | 152092850 | 152092950 | 901-Lng-B-T  | 191 | chrX:152092850-152092950 |
| chrX | 152144050 | 152144150 | 1065-Lng-C-T | 76  | chrX:152144050-152144150 |
| chrX | 152406250 | 152406350 | 1065-Lng-B-T | 45  | chrX:152406250-152406350 |
| chrX | 152795250 | 152795350 | 1223-Lng-B-T | 302 | chrX:152795250-152795350 |
| chrX | 152955550 | 152955650 | 1223-Lng-B-T | 364 | chrX:152955550-152955650 |
| chrX | 152960250 | 152960350 | 1223-Lng-B-T | 45  | chrX:152960250-152960350 |
| chrX | 153411650 | 153411750 | 901-Lng-C-T  | 64  | chrX:153411650-153411750 |
| chrX | 153438950 | 153439050 | 1065-Lng-A-T | 93  | chrX:153438950-153439050 |
| chrX | 153596750 | 153596850 | 1090-Lng-A-T | 321 | chrX:153596750-153596850 |
| chrX | 153879650 | 153879750 | 1152-Lng-A-T | 34  | chrX:153879650-153879750 |
| chrX | 153906750 | 153906850 | 1152-Lng-A-T | 88  | chrX:153906750-153906850 |
| chrX | 153950450 | 153950550 | 901-Lng-B-T  | 500 | chrX:153950450-153950550 |
| chrX | 153976650 | 153976750 | 901-Lng-A-T  | 683 | chrX:153976650-153976750 |
| chrX | 154193150 | 154193250 | 1065-Lng-A-T | 73  | chrX:154193150-154193250 |
| chrX | 154310550 | 154310650 | 1223-Lng-B-T | 42  | chrX:154310550-154310650 |
| chrX | 154449650 | 154449750 | 1152-Lng-A-T | 97  | chrX:154449650-154449750 |
| chrX | 154496850 | 154496950 | 1274-Lng-A-T | 53  | chrX:154496850-154496950 |
| chrX | 154859050 | 154859150 | 901-Lng-B-T  | 245 | chrX:154859050-154859150 |
| chrX | 154938150 | 154938250 | 1223-Lng-C-T | 72  | chrX:154938150-154938250 |
| chrX | 155520250 | 155520350 | 901-Lng-A-T  | 157 | chrX:155520250-155520350 |
| chrX | 155677650 | 155677750 | 1090-Lng-B-T | 879 | chrX:155677650-155677750 |
| chrX | 155846250 | 155846350 | 1223-Lng-D-T | 44  | chrX:155846250-155846350 |
| chrX | 155931350 | 155931450 | 1065-Lng-A-T | 161 | chrX:155931350-155931450 |
| chrX | 156002050 | 156002150 | 1274-Lng-A-T | 53  | chrX:156002050-156002150 |
| chrX | 156036550 | 156036650 | 1065-Lng-A-T | 54  | chrX:156036550-156036650 |
| chrX | 156131750 | 156131850 | 846-Lng-A-T  | 88  | chrX:156131750-156131850 |
| chrX | 156244550 | 156244650 | 1274-Lng-A-T | 107 | chrX:156244550-156244650 |
| chrX | 156393050 | 156393150 | 901-Lng-A-T  | 72  | chrX:156393050-156393150 |
| chrX | 156488550 | 156488650 | 901-Lng-C-T  | 41  | chrX:156488550-156488650 |
| chrX | 156892450 | 156892550 | 1223-Lng-B-T | 263 | chrX:156892450-156892550 |
| chrX | 156964150 | 156964250 | 1065-Lng-A-T | 64  | chrX:156964150-156964250 |
| chrX | 156992050 | 156992150 | 1065-Lng-B-T | 57  | chrX:156992050-156992150 |
| chrX | 157070250 | 157070350 | 1223-Lng-C-T | 44  | chrX:157070250-157070350 |
| chrX | 157073350 | 157073450 | 901-Lng-A-T  | 132 | chrX:157073350-157073450 |
| chrX | 157085450 | 157085550 | 846-Lng-A-T  | 135 | chrX:157085450-157085550 |
| chrX | 157273450 | 157273550 | 901-Lng-A-T  | 77  | chrX:157273450-157273550 |
| chrX | 157308350 | 157308450 | 1188-Lng-A-T | 36  | chrX:157308350-157308450 |
| chrX | 157381950 | 157382050 | 1223-Lng-D-T | 47  | chrX:157381950-157382050 |
| chrX | 157420450 | 157420550 | 901-Lng-A-T  | 316 | chrX:157420450-157420550 |

**Table S2: SB Insertion regions**

|      |           |           |              |     |                          |
|------|-----------|-----------|--------------|-----|--------------------------|
| chrX | 157447150 | 157447250 | 1100-Lng-A-T | 162 | chrX:157447150-157447250 |
| chrX | 157465050 | 157465150 | 1065-Lng-A-T | 498 | chrX:157465050-157465150 |
| chrX | 157573350 | 157573450 | 1223-Lng-C-T | 60  | chrX:157573350-157573450 |
| chrX | 157763950 | 157764050 | 901-Lng-C-T  | 54  | chrX:157763950-157764050 |
| chrX | 158181850 | 158181950 | 1065-Lng-A-T | 51  | chrX:158181850-158181950 |
| chrX | 158531850 | 158531950 | 1223-Lng-C-T | 58  | chrX:158531850-158531950 |
| chrX | 158815950 | 158816050 | 1065-Lng-C-T | 79  | chrX:158815950-158816050 |
| chrX | 159075750 | 159075850 | 1065-Lng-A-T | 321 | chrX:159075750-159075850 |
| chrX | 159094250 | 159094350 | 1090-Lng-A-T | 125 | chrX:159094250-159094350 |
| chrX | 159238350 | 159238450 | 901-Lng-D-T  | 668 | chrX:159238350-159238450 |
| chrX | 159251550 | 159251650 | 901-Lng-D-T  | 986 | chrX:159251550-159251650 |
| chrX | 159349950 | 159350050 | 1065-Lng-B-T | 51  | chrX:159349950-159350050 |
| chrX | 159415050 | 159415150 | 1065-Lng-B-T | 67  | chrX:159415050-159415150 |
| chrX | 159431350 | 159431450 | 1223-Lng-B-T | 151 | chrX:159431350-159431450 |
| chrX | 159436650 | 159436750 | 1065-Lng-B-T | 61  | chrX:159436650-159436750 |
| chrX | 159758850 | 159758950 | 1274-Lng-A-T | 57  | chrX:159758850-159758950 |
| chrX | 159789750 | 159789850 | 1100-Lng-A-T | 108 | chrX:159789750-159789850 |
| chrX | 159815750 | 159815850 | 1223-Lng-B-T | 167 | chrX:159815750-159815850 |
| chrX | 159861250 | 159861350 | 846-Lng-A-T  | 156 | chrX:159861250-159861350 |
| chrX | 160388350 | 160388450 | 1274-Lng-A-T | 146 | chrX:160388350-160388450 |
| chrX | 160417350 | 160417450 | 846-Lng-A-T  | 149 | chrX:160417350-160417450 |
| chrX | 160423050 | 160423150 | 1065-Lng-A-T | 65  | chrX:160423050-160423150 |
| chrX | 160521650 | 160521750 | 901-Lng-B-T  | 109 | chrX:160521650-160521750 |
| chrX | 160723850 | 160723950 | 901-Lng-C-T  | 63  | chrX:160723850-160723950 |
| chrX | 160782050 | 160782150 | 901-Lng-B-T  | 163 | chrX:160782050-160782150 |
| chrX | 160835750 | 160835850 | 1167-Lng-A-T | 109 | chrX:160835750-160835850 |
| chrX | 160851050 | 160851150 | 1223-Lng-C-T | 55  | chrX:160851050-160851150 |
| chrX | 161010450 | 161010550 | 846-Lng-A-T  | 170 | chrX:161010450-161010550 |
| chrX | 161156150 | 161156250 | 901-Lng-D-T  | 190 | chrX:161156150-161156250 |
| chrX | 161410150 | 161410250 | 1223-Lng-B-T | 118 | chrX:161410150-161410250 |
| chrX | 161438050 | 161438150 | 1090-Lng-B-T | 109 | chrX:161438050-161438150 |
| chrX | 161492850 | 161492950 | 1223-Lng-A-T | 162 | chrX:161492850-161492950 |
| chrX | 161502150 | 161502250 | 846-Lng-A-T  | 60  | chrX:161502150-161502250 |
| chrX | 161635850 | 161635950 | 1090-Lng-B-T | 703 | chrX:161635850-161635950 |
| chrX | 161741150 | 161741250 | 1065-Lng-B-T | 75  | chrX:161741150-161741250 |
| chrX | 161802250 | 161802350 | 1223-Lng-B-T | 45  | chrX:161802250-161802350 |
| chrX | 161894050 | 161894150 | 1152-Lng-A-T | 75  | chrX:161894050-161894150 |
| chrX | 161985450 | 161985550 | 901-Lng-B-T  | 176 | chrX:161985450-161985550 |
| chrX | 162118850 | 162118950 | 901-Lng-B-T  | 228 | chrX:162118850-162118950 |
| chrX | 162131650 | 162131750 | 1065-Lng-A-T | 37  | chrX:162131650-162131750 |
| chrX | 162422650 | 162422750 | 1151-Lng-A-T | 59  | chrX:162422650-162422750 |
| chrX | 162441050 | 162441150 | 846-Lng-A-T  | 169 | chrX:162441050-162441150 |
| chrX | 162643550 | 162643650 | 1151-Lng-A-T | 423 | chrX:162643550-162643650 |
| chrX | 162760250 | 162760350 | 1065-Lng-A-T | 46  | chrX:162760250-162760350 |
| chrX | 162786650 | 162786750 | 1274-Lng-A-T | 50  | chrX:162786650-162786750 |
| chrX | 162848350 | 162848450 | 1188-Lng-A-T | 53  | chrX:162848350-162848450 |

**Table S2: SB Insertion regions**

|      |           |           |              |       |                          |
|------|-----------|-----------|--------------|-------|--------------------------|
| chrX | 162872950 | 162873050 | 1100-Lng-A-T | 57    | chrX:162872950-162873050 |
| chrX | 162886650 | 162886750 | 1090-Lng-A-T | 168   | chrX:162886650-162886750 |
| chrX | 162894150 | 162894250 | 901-Lng-B-T  | 98    | chrX:162894150-162894250 |
| chrX | 162899250 | 162899350 | 901-Lng-D-T  | 234   | chrX:162899250-162899350 |
| chrX | 162907950 | 162908050 | 1152-Lng-A-T | 104   | chrX:162907950-162908050 |
| chrX | 162909650 | 162909750 | 1188-Lng-A-T | 108   | chrX:162909650-162909750 |
| chrX | 162913450 | 162913550 | 1100-Lng-A-T | 123   | chrX:162913450-162913550 |
| chrX | 162959550 | 162959650 | 1065-Lng-B-T | 49    | chrX:162959550-162959650 |
| chrX | 162999250 | 162999350 | 1100-Lng-B-T | 11675 | chrX:162999250-162999350 |
| chrX | 163039350 | 163039450 | 1072-Lng-A-T | 117   | chrX:163039350-163039450 |
| chrX | 163269250 | 163269350 | 1274-Lng-A-T | 51    | chrX:163269250-163269350 |
| chrX | 163308150 | 163308250 | 1065-Lng-B-T | 242   | chrX:163308150-163308250 |
| chrX | 163431150 | 163431250 | 1004-Lng-A-T | 113   | chrX:163431150-163431250 |
| chrX | 163460450 | 163460550 | 1167-Lng-A-T | 84    | chrX:163460450-163460550 |
| chrX | 163523150 | 163523250 | 1223-Lng-A-T | 112   | chrX:163523150-163523250 |
| chrX | 163545750 | 163545850 | 1223-Lng-A-T | 1116  | chrX:163545750-163545850 |
| chrX | 163752250 | 163752350 | 1065-Lng-B-T | 71    | chrX:163752250-163752350 |
| chrX | 163788250 | 163788350 | 1152-Lng-A-T | 68    | chrX:163788250-163788350 |
| chrX | 164080650 | 164080750 | 1065-Lng-C-T | 1425  | chrX:164080650-164080750 |
| chrX | 164204150 | 164204250 | 1274-Lng-A-T | 49    | chrX:164204150-164204250 |
| chrX | 164210750 | 164210850 | 1223-Lng-B-T | 128   | chrX:164210750-164210850 |
| chrX | 164328650 | 164328750 | 1065-Lng-A-T | 94    | chrX:164328650-164328750 |
| chrX | 164400750 | 164400850 | 1065-Lng-B-T | 56    | chrX:164400750-164400850 |
| chrX | 164480150 | 164480250 | 1065-Lng-C-T | 80    | chrX:164480150-164480250 |
| chrX | 164667350 | 164667450 | 1065-Lng-B-T | 61    | chrX:164667350-164667450 |
| chrX | 164742450 | 164742550 | 1152-Lng-A-T | 82    | chrX:164742450-164742550 |
| chrX | 164744450 | 164744550 | 901-Lng-A-T  | 92    | chrX:164744450-164744550 |
| chrX | 165098750 | 165098850 | 1188-Lng-A-T | 96    | chrX:165098750-165098850 |
| chrX | 165237650 | 165237750 | 901-Lng-A-T  | 76    | chrX:165237650-165237750 |
| chrX | 165273250 | 165273350 | 1223-Lng-A-T | 75    | chrX:165273250-165273350 |
| chrX | 165309950 | 165310050 | 1065-Lng-A-T | 464   | chrX:165309950-165310050 |
| chrX | 165381850 | 165381950 | 901-Lng-B-T  | 42    | chrX:165381850-165381950 |
| chrX | 165739950 | 165740050 | 1151-Lng-A-T | 75    | chrX:165739950-165740050 |
| chrX | 166002050 | 166002150 | 1151-Lng-A-T | 344   | chrX:166002050-166002150 |
| chrX | 166087850 | 166087950 | 901-Lng-A-T  | 121   | chrX:166087850-166087950 |
| chrX | 166126250 | 166126350 | 1223-Lng-B-T | 46    | chrX:166126250-166126350 |
| chrX | 166419950 | 166420050 | 846-Lng-A-T  | 64    | chrX:166419950-166420050 |
| chrY | 60350     | 60450     | 1274-Lng-A-T | 166   | chrY:60350-60450         |
| chrY | 258350    | 258450    | 1072-Lng-A-T | 72    | chrY:258350-258450       |
| chrY | 351050    | 351150    | 1100-Lng-A-T | 53    | chrY:351050-351150       |
| chrY | 511950    | 512050    | 1100-Lng-A-T | 130   | chrY:511950-512050       |
| chrY | 603050    | 603150    | 1188-Lng-A-T | 35    | chrY:603050-603150       |
| chrY | 607550    | 607650    | 1152-Lng-A-T | 122   | chrY:607550-607650       |
| chrY | 616750    | 616850    | 1072-Lng-A-T | 147   | chrY:616750-616850       |
| chrY | 618450    | 618550    | 1100-Lng-A-T | 84    | chrY:618450-618550       |
| chrY | 646050    | 646150    | 1065-Lng-B-T | 70    | chrY:646050-646150       |

**Table S2: SB Insertion regions**

|      |         |         |              |     |                      |
|------|---------|---------|--------------|-----|----------------------|
| chrY | 662350  | 662450  | 1274-Lng-A-T | 53  | chrY:662350-662450   |
| chrY | 1019650 | 1019750 | 1004-Lng-A-T | 189 | chrY:1019650-1019750 |
| chrY | 1317950 | 1318050 | 1004-Lng-A-T | 67  | chrY:1317950-1318050 |
| chrY | 1633650 | 1633750 | 1274-Lng-A-T | 174 | chrY:1633650-1633750 |
| chrY | 1635050 | 1635150 | 1072-Lng-A-T | 166 | chrY:1635050-1635150 |
| chrY | 1714850 | 1714950 | 1152-Lng-A-T | 94  | chrY:1714850-1714950 |
| chrY | 1744650 | 1744750 | 1090-Lng-A-T | 124 | chrY:1744650-1744750 |
| chrY | 1791950 | 1792050 | 1152-Lng-A-T | 124 | chrY:1791950-1792050 |
| chrY | 1996550 | 1996650 | 1004-Lng-A-T | 249 | chrY:1996550-1996650 |
| chrY | 2005450 | 2005550 | 1274-Lng-A-T | 76  | chrY:2005450-2005550 |
| chrY | 2496150 | 2496250 | 1072-Lng-A-T | 56  | chrY:2496150-2496250 |
| chrY | 2506550 | 2506650 | 1100-Lng-A-T | 69  | chrY:2506550-2506650 |
| chrY | 2782050 | 2782150 | 1167-Lng-A-T | 102 | chrY:2782050-2782150 |
| chrY | 2782850 | 2782950 | 1152-Lng-A-T | 80  | chrY:2782850-2782950 |
| chrY | 2788650 | 2788750 | 1274-Lng-A-T | 53  | chrY:2788650-2788750 |
| chrY | 2794050 | 2794150 | 1152-Lng-A-T | 119 | chrY:2794050-2794150 |
| chrY | 2855250 | 2855350 | 1100-Lng-A-T | 60  | chrY:2855250-2855350 |
| chrY | 2855850 | 2855950 | 1274-Lng-A-T | 51  | chrY:2855850-2855950 |
| chrY | 2856050 | 2856150 | 1090-Lng-A-T | 111 | chrY:2856050-2856150 |
| chrY | 2856550 | 2856650 | 1072-Lng-A-T | 106 | chrY:2856550-2856650 |
| chrY | 2858950 | 2859050 | 1167-Lng-A-T | 58  | chrY:2858950-2859050 |
| chrY | 2859150 | 2859250 | 1004-Lng-A-T | 70  | chrY:2859150-2859250 |
| chrY | 2862450 | 2862550 | 1004-Lng-A-T | 82  | chrY:2862450-2862550 |
| chrY | 2867850 | 2867950 | 1090-Lng-B-T | 63  | chrY:2867850-2867950 |
| chrY | 2869950 | 2870050 | 1072-Lng-A-T | 69  | chrY:2869950-2870050 |
| chrY | 2875950 | 2876050 | 1274-Lng-A-T | 120 | chrY:2875950-2876050 |
| chrY | 2876250 | 2876350 | 1167-Lng-A-T | 54  | chrY:2876250-2876350 |
| chrY | 2881150 | 2881250 | 1188-Lng-A-T | 35  | chrY:2881150-2881250 |
| chrY | 2883950 | 2884050 | 1090-Lng-A-T | 58  | chrY:2883950-2884050 |
| chrY | 2888950 | 2889050 | 1072-Lng-A-T | 71  | chrY:2888950-2889050 |
| chrY | 2890350 | 2890450 | 1100-Lng-A-T | 90  | chrY:2890350-2890450 |
| chrY | 2892050 | 2892150 | 1152-Lng-A-T | 50  | chrY:2892050-2892150 |

1 Chromosome addresses are based on the GRCm38/mm10 genome build
